# Supplementary material for: Phyletic Distribution and Lineage-Specific Domain Architectures of Archaeal Two-Component Signal Transduction Systems
Source: PubMed Central journal article supplement (PMC5847659; doi:10.1128/jb.00681-17), 2018-03-12
Supplement: JB.00681-17_zjb999094653s1.pdf [file JB.00681-17_zjb999094653s1.pdf]

|                                        |          |         |                |            |            |            |           |            |           |           |            |           |           |
|----------------------------------------|----------|---------|----------------|------------|------------|------------|-----------|------------|-----------|-----------|------------|-----------|-----------|
| <b>Euryarchaeota</b>                   |          |         |                |            |            |            |           |            |           |           |            |           |           |
| <b>Archaeoglobi</b>                    |          |         | <b>15,162</b>  | <b>38</b>  | <b>42</b>  | <b>32</b>  | <b>5</b>  | <b>1</b>   | <b>0</b>  | <b>0</b>  | <b>0</b>   | <b>0</b>  | <b>4</b>  |
| Archaeoglobus fulgidus DSM 4304        | AE000782 | 224325  | 2400           | 13         | 12         | 9          | 1         | 1          | 0         | 0         | 0          | 0         | 1         |
| Archaeoglobus profundus DSM 5631       | CP001857 | 572546  | 1818           | 3          | 7          | 4          | 1         | 0          | 0         | 0         | 0          | 0         | 2         |
| Archaeoglobus sulfaticallidus PM70-1   | CP005290 | 387631  | 2213           | 4          | 5          | 4          | 0         | 0          | 0         | 0         | 0          | 0         | 1         |
| Archaeoglobus veneficus SNP6           | CP002588 | 693661  | 2065           | 4          | 3          | 2          | 1         | 0          | 0         | 0         | 0          | 0         | 0         |
| Ferroglobus placidus DSM 10642         | CP001899 | 589924  | 2463           | 4          | 4          | 3          | 1         | 0          | 0         | 0         | 0          | 0         | 0         |
| Geoglobus acetivorans SBH6             | CP009552 | 565033  | 2,218          | 5          | 8          | 7          | 1         | 0          | 0         | 0         | 0          | 0         | 0         |
| Geoglobus ahangari                     | CP011267 | 113653  | 1,985          | 4          | 3          | 3          | 0         | 0          | 0         | 0         | 0          | 0         | 0         |
|                                        |          |         |                |            |            |            |           |            |           |           |            |           |           |
| <b>Halobacteria</b>                    |          |         | <b>123,786</b> | <b>745</b> | <b>695</b> | <b>163</b> | <b>35</b> | <b>230</b> | <b>51</b> | <b>11</b> | <b>110</b> | <b>81</b> | <b>14</b> |
| Halalkalicoccus jeotgali B3            | CP002062 | 795797  | 3,873          | 6          | 14         | 4          | 0         | 2          | 2         | 1         | 2          | 3         | 0         |
| Halanaeroarchaeum sulfurireducens HSR2 | CP008874 | 1604004 | 2,228          | 27         | 8          | 1          | 1         | 3          | 1         | 0         | 2          | 0         | 0         |
| Haloarcula hispanica ATCC 33960        | CP002921 | 634497  | 3,865          | 26         | 36         | 3          | 1         | 18         | 6         | 0         | 6          | 2         | 0         |
| Haloarcula marismortui ATCC 43049      | AY596297 | 272569  | 4,240          | 37         | 45         | 7          | 1         | 21         | 7         | 1         | 6          | 2         | 0         |
| Haloarcula sp. CBA1115                 | CP010529 | 1592728 | 3,916          | 26         | 36         | 3          | 1         | 19         | 5         | 0         | 6          | 2         | 0         |
| Halobacterium hubeiense                | LN831302 | 1407499 | 3,143          | 18         | 19         | 2          | 1         | 6          | 2         | 0         | 6          | 2         | 0         |
| Halobacterium salinarum NRC-1          | AE004437 | 64091   | 2,622          | 11         | 8          | 1          | 1         | 2          | 0         | 0         | 3          | 1         | 0         |
| Halobacterium sp. DL1                  | CP007060 | 751944  | 3,280          | 18         | 17         | 5          | 1         | 4          | 1         | 0         | 4          | 1         | 1         |
| Halobiforma lacisalsi AJ5              | CP019285 | 358396  | 4,097          | 25         | 22         | 8          | 2         | 6          | 0         | 0         | 2          | 4         | 0         |
| Halodesulfurarchaeum formicicum        | CP016804 | 1873524 | 2079           | 15         | 6          | 1          | 1         | 2          | 0         | 0         | 1          | 1         | 0         |
| Haloferax gibbonsii ATCC 33959         | CP011947 | 1227459 | 3,744          | 27         | 24         | 3          | 1         | 10         | 3         | 0         | 2          | 4         | 1         |
| Haloferax mediterranei ATCC 33500      | CP001868 | 523841  | 3,752          | 22         | 17         | 3          | 1         | 4          | 3         | 0         | 1          | 4         | 1         |
| Haloferax volcanii DS2                 | CP001956 | 309800  | 4,042          | 15         | 22         | 4          | 1         | 8          | 4         | 1         | 2          | 1         | 1         |
| Halogeometricum borinquense DSM 11551  | CP001690 | 469382  | 3,898          | 21         | 25         | 4          | 1         | 8          | 3         | 1         | 3          | 3         | 2         |
| Halomicrobium mukohataei DSM 12286     | CP001688 | 485914  | 3,349          | 21         | 25         | 3          | 1         | 8          | 1         | 0         | 9          | 1         | 2         |
| Halopiger xanaduensis SH-6             | CP002839 | 797210  | 4,221          | 26         | 18         | 10         | 2         | 2          | 0         | 0         | 2          | 2         | 0         |
| Haloquadratum walsbyi DSM 16790        | AM180088 | 768065  | 2,560          | 4          | 6          | 1          | 0         | 3          | 0         | 1         | 0          | 1         | 0         |
| Halorhabdus tiamatea SARL4B            | HF571520 | 1033806 | 3,023          | 18         | 17         | 4          | 1         | 7          | 0         | 0         | 4          | 1         | 0         |
| Halorhabdus utahensis DSM 12940        | CP001687 | 519442  | 2,998          | 31         | 29         | 4          | 1         | 11         | 4         | 0         | 7          | 2         | 0         |



|                                                     |          |         |                |            |            |            |           |            |           |           |          |          |            |
|-----------------------------------------------------|----------|---------|----------------|------------|------------|------------|-----------|------------|-----------|-----------|----------|----------|------------|
| Methanothermobacter marburgensis str. Marburg       | CP001710 | 79929   | 1,757          | 11         | 11         | 1          | 0         | 5          | 1         | 0         | 0        | 0        | 4          |
| Methanothermobacter sp. CaT2                        | AP011952 | 866790  | 1,725          | 12         | 10         | 1          | 0         | 4          | 0         | 0         | 0        | 0        | 5          |
| Methanothermobacter thermautotrophicus str. Delta H | AE000666 | 187420  | 1,873          | 13         | 10         | 1          | 0         | 3          | 2         | 0         | 0        | 0        | 4          |
| Methanothermobacter wolfeii                         | LT608329 | 145261  | 1,665          | 14         | 10         | 1          | 0         | 3          | 2         | 0         | 0        | 0        | 4          |
| Methanothermus fervidus DSM 2088                    | CP002278 | 523846  | 1,285          | 0          | 0          | 0          | 0         | 0          | 0         | 0         | 0        | 0        | 0          |
|                                                     |          |         |                |            |            |            |           |            |           |           |          |          |            |
| <b>Methanococci</b>                                 |          |         | <b>19,966</b>  | <b>19</b>  | <b>23</b>  | <b>15</b>  | <b>8</b>  | <b>0</b>   | <b>0</b>  | <b>0</b>  | <b>0</b> | <b>0</b> | <b>0</b>   |
| Methanocaldococcus bathoardescens                   | CP009149 | 1301915 | 1,637          | 1          | 2          | 1          | 1         | 0          | 0         | 0         | 0        | 0        | 0          |
| Methanocaldococcus fervens AG86                     | CP001696 | 573064  | 1,581          | 2          | 3          | 2          | 1         | 0          | 0         | 0         | 0        | 0        | 0          |
| Methanocaldococcus infernus ME                      | CP002009 | 573063  | 1,442          | 1          | 2          | 1          | 1         | 0          | 0         | 0         | 0        | 0        | 0          |
| Methanocaldococcus jannaschii DSM 2661              | L77117   | 243232  | 1,786          | 0          | 0          | 0          | 0         | 0          | 0         | 0         | 0        | 0        | 0          |
| Methanocaldococcus sp. FS406-22                     | CP001901 | 644281  | 1,816          | 1          | 1          | 1          | 0         | 0          | 0         | 0         | 0        | 0        | 0          |
| Methanocaldococcus vulcanius M7                     | CP001787 | 579137  | 1,742          | 1          | 2          | 1          | 1         | 0          | 0         | 0         | 0        | 0        | 0          |
| Methanococcus aeolicus Nankai-3                     | CP000743 | 419665  | 1,490          | 1          | 1          | 1          | 0         | 0          | 0         | 0         | 0        | 0        | 0          |
| Methanococcus maripaludis S2                        | BX950229 | 402880  | 1,722          | 3          | 3          | 2          | 1         | 0          | 0         | 0         | 0        | 0        | 0          |
| Methanococcus vannielii SB                          | CP000742 | 406327  | 1,678          | 5          | 3          | 2          | 1         | 0          | 0         | 0         | 0        | 0        | 0          |
| Methanococcus voltae A3                             | CP002057 | 456320  | 1,717          | 2          | 3          | 2          | 1         | 0          | 0         | 0         | 0        | 0        | 0          |
| Methanothermococcus okinawensis IH1                 | CP002792 | 647113  | 1,576          | 2          | 3          | 2          | 1         | 0          | 0         | 0         | 0        | 0        | 0          |
| Methanotorris igneus Kol 5                          | CP002737 | 880724  | 1,779          | 0          | 0          | 0          | 0         | 0          | 0         | 0         | 0        | 0        | 0          |
|                                                     |          |         |                |            |            |            |           |            |           |           |          |          |            |
| <b>Methanomicrobia</b>                              |          |         | <b>108,246</b> | <b>998</b> | <b>697</b> | <b>300</b> | <b>33</b> | <b>175</b> | <b>62</b> | <b>20</b> | <b>0</b> | <b>0</b> | <b>107</b> |
| Methanocella arvoryzae MRE50                        | AM114193 | 351160  | 3,103          | 45         | 14         | 9          | 1         | 0          | 1         | 0         | 0        | 0        | 3          |
| Methanocella conradii HZ254                         | CP003243 | 1041930 | 2,456          | 19         | 9          | 8          | 0         | 0          | 0         | 0         | 0        | 0        | 1          |
| Methanocella paludicola SANAE                       | AP011532 | 304371  | 3,004          | 51         | 8          | 6          | 0         | 1          | 0         | 0         | 0        | 0        | 1          |
| Methanococcoides burtonii DSM 6242                  | CP000300 | 259564  | 2406           | 26         | 18         | 8          | 1         | 4          | 2         | 1         | 0        | 0        | 2          |
| Methanococcoides methylutens MM1                    | CP009518 | 1434104 | 2,203          | 27         | 14         | 7          | 0         | 4          | 1         | 1         | 0        | 0        | 1          |
| Methanocorpusculum labreanum Z                      | CP000559 | 410358  | 1,739          | 1          | 1          | 0          | 0         | 0          | 0         | 0         | 0        | 0        | 1          |
| Methanoculleus bourgensis MS2                       | HE964772 | 1201294 | 2,538          | 14         | 7          | 1          | 1         | 4          | 0         | 0         | 0        | 0        | 1          |

|                                              |          |         |       |    |    |    |   |    |   |   |   |   |    |
|----------------------------------------------|----------|---------|-------|----|----|----|---|----|---|---|---|---|----|
| Methanoculleus marisnigri JR1                | CP000562 | 368407  | 2,489 | 24 | 10 | 3  | 1 | 4  | 0 | 0 | 0 | 0 | 2  |
| Methanoculleus sp. MAB1                      | LT158599 | 86622   | 3,450 | 15 | 5  | 1  | 1 | 1  | 1 | 0 | 0 | 0 | 1  |
| Methanofollis liminatans DSM 4140            | CM001555 | 28892   | 2,396 | 17 | 20 | 4  | 1 | 9  | 4 | 0 | 0 | 0 | 2  |
| Methanohalobium evestigatum Z-7303           | CP002069 | 644295  | 2,254 | 28 | 11 | 7  | 1 | 0  | 0 | 0 | 0 | 0 | 3  |
| Methanohalophilus halophilus Z-7982          | CP017921 | 2177    | 1,987 | 26 | 12 | 7  | 0 | 0  | 1 | 1 | 0 | 0 | 3  |
| Methanohalophilus mahii DSM 5219             | CP001994 | 547558  | 1,987 | 22 | 13 | 7  | 0 | 2  | 1 | 1 | 0 | 0 | 2  |
| Methanolacinia petrolearia DSM 11571         | CP002117 | 679926  | 2,785 | 32 | 30 | 7  | 1 | 10 | 6 | 0 | 0 | 0 | 6  |
| Methanolobus psychrophilus R15               | CP003083 | 1094980 | 2,841 | 36 | 20 | 8  | 1 | 5  | 2 | 1 | 0 | 0 | 3  |
| Methanomethylovorans hollandica DSM 15978    | CP003362 | 867904  | 2,525 | 11 | 9  | 4  | 1 | 2  | 1 | 1 | 0 | 0 | 0  |
| Methanoplanus limicola DSM 2279              | CM001436 | 937775  | 2,967 | 32 | 39 | 6  | 1 | 18 | 6 | 0 | 0 | 0 | 8  |
| Methanoregula boonei 6A8                     | CP000780 | 456442  | 2,450 | 30 | 63 | 15 | 1 | 22 | 6 | 0 | 0 | 0 | 19 |
| Methanoregula formicica SMSP                 | CP003167 | 593750  | 2,816 | 30 | 40 | 5  | 1 | 20 | 8 | 1 | 0 | 0 | 5  |
| Methanosaeta concilii GP6                    | CP002565 | 990316  | 2,858 | 8  | 4  | 3  | 0 | 0  | 0 | 0 | 0 | 0 | 1  |
| Methanosaeta harundinacea 6Ac                | CP003117 | 1110509 | 2,399 | 2  | 6  | 2  | 0 | 1  | 1 | 1 | 0 | 0 | 1  |
| Methanosaeta thermophila PT                  | CP000477 | 349307  | 1,696 | 7  | 4  | 3  | 0 | 0  | 0 | 0 | 0 | 0 | 1  |
| Methanosalsum zhilinae DSM 4017              | CP002101 | 679901  | 1,976 | 28 | 9  | 5  | 1 | 0  | 2 | 0 | 0 | 0 | 1  |
| Methanosarcina acetivorans C2A               | AE010299 | 188937  | 4,540 | 51 | 17 | 12 | 2 | 2  | 0 | 0 | 0 | 0 | 1  |
| Methanosarcina barkeri str. Fusaro           | CP000099 | 269797  | 3,625 | 25 | 12 | 8  | 1 | 1  | 0 | 1 | 0 | 0 | 1  |
| Methanosarcina horonobensis HB-1 = JCM 15518 | CP009516 | 1434110 | 4,095 | 67 | 23 | 17 | 1 | 3  | 0 | 1 | 0 | 0 | 1  |
| Methanosarcina lacustris Z-7289              | CP009515 | 1434111 | 3,264 | 18 | 10 | 7  | 1 | 0  | 0 | 1 | 0 | 0 | 1  |
| Methanosarcina mazei Go1                     | AE008384 | 192952  | 3,371 | 33 | 15 | 10 | 2 | 1  | 0 | 1 | 0 | 0 | 1  |
| Methanosarcina siciliae C2J                  | CP009508 | 1434118 | 4,401 | 43 | 17 | 11 | 2 | 2  | 0 | 1 | 0 | 0 | 1  |
| Methanosarcina sp. 795                       | CP011449 | 1653396 | 2,416 | 15 | 14 | 10 | 1 | 0  | 0 | 1 | 0 | 0 | 2  |
| Methanosarcina sp. Kolksee                   | CP009524 | 1434099 | 3,476 | 21 | 15 | 11 | 1 | 1  | 0 | 1 | 0 | 0 | 1  |
| Methanosarcina sp. MTP4                      | CP009505 | 1434100 | 3,250 | 28 | 16 | 13 | 1 | 1  | 0 | 0 | 0 | 0 | 1  |
| Methanosarcina sp. WH1                       | CP009504 | 1434102 | 3,198 | 22 | 15 | 11 | 1 | 1  | 0 | 1 | 0 | 0 | 1  |
| Methanosarcina sp. WWM596                    | CP009503 | 1434103 | 3,408 | 22 | 16 | 11 | 1 | 1  | 0 | 1 | 0 | 0 | 2  |
| Methanosarcina thermophila CHTI-55           | CP009502 | 1434121 | 2,545 | 21 | 16 | 11 | 1 | 1  | 0 | 2 | 0 | 0 | 1  |







|                                             |            |         |                |              |              |            |            |            |            |           |            |           |            |
|---------------------------------------------|------------|---------|----------------|--------------|--------------|------------|------------|------------|------------|-----------|------------|-----------|------------|
| <b>Thaumarchaeota</b>                       |            |         | 36,321         | 175          | 224          | 172        | 7          | 1          | 0          | 1         | 0          | 0         | 43         |
| Candidatus Caldiarchaeum subterraneum       | BA000048   | 311458  | 1,730          | 0            | 0            | 0          | 0          | 0          | 0          | 0         | 0          | 0         | 0          |
| Candidatus Nitrocosmicus oleophilus         | CP012850   | 1353260 | 3,725          | 22           | 24           | 16         | 0          | 0          | 0          | 0         | 0          | 0         | 8          |
| Candidatus Nitrosoarchaeum limnia SFB1      | CM001158   | 1007084 | 2,038          | 26           | 33           | 28         | 1          | 1          | 0          | 0         | 0          | 0         | 3          |
| Candidatus Nitrosomarinus catalina          | CP021324   | 1898749 | 1,677          | 0            | 1            | 0          | 0          | 0          | 0          | 0         | 0          | 0         | 1          |
| Candidatus Nitrosopelagicus brevis          | CP007026   | 1410606 | 1,445          | 0            | 0            | 0          | 0          | 0          | 0          | 0         | 0          | 0         | 0          |
| Candidatus Nitrosopumilus adriaticus        | CP011070   | 1580092 | 2,184          | 22           | 34           | 28         | 1          | 0          | 0          | 0         | 0          | 0         | 5          |
| Candidatus Nitrosopumilus koreensis AR1     | CP003842   | 1229908 | 1,890          | 12           | 15           | 12         | 0          | 0          | 0          | 0         | 0          | 0         | 3          |
| Candidatus Nitrosopumilus piranensis        | CP010868   | 1582439 | 2,161          | 2            | 3            | 1          | 0          | 0          | 0          | 0         | 0          | 0         | 2          |
| Candidatus Nitrosopumilus sediminis         | CP003843   | 1229909 | 1,974          | 6            | 9            | 5          | 0          | 0          | 0          | 0         | 0          | 0         | 4          |
| Candidatus Nitrososphaera evergladensis SR1 | CP007174   | 1459636 | 3,499          | 19           | 19           | 12         | 1          | 0          | 0          | 0         | 0          | 0         | 6          |
| Candidatus Nitrososphaera gargensis Ga9.2   | CP002408   | 1237085 | 3,565          | 19           | 31           | 25         | 1          | 0          | 0          | 0         | 0          | 0         | 5          |
| Candidatus Nitrosotalea devanaterrea        | LN890280   | 1078905 | 2103           | 19           | 19           | 16         | 1          | 0          | 0          | 0         | 0          | 0         | 2          |
| Candidatus Nitrosotenuis cloacae            | CP011097   | 1603555 | 1,717          | 6            | 15           | 12         | 1          | 0          | 0          | 0         | 0          | 0         | 2          |
| Cenarchaeum symbiosum A                     | DP000238   | 414004  | 2,017          | 0            | 0            | 0          | 0          | 0          | 0          | 0         | 0          | 0         | 0          |
| Nitrosopumilus maritimus SCM1               | CP000866   | 436308  | 1,795          | 12           | 10           | 9          | 0          | 0          | 0          | 0         | 0          | 0         | 1          |
| Nitrososphaera viennensis EN76              | CP007536   | 926571  | 2801           | 10           | 11           | 8          | 1          | 0          | 0          | 1         | 0          | 0         | 1          |
|                                             |            |         |                |              |              |            |            |            |            |           |            |           |            |
| <b>unclassified Archaea</b>                 |            |         | <b>5,604</b>   | <b>0</b>     | <b>0</b>     | <b>0</b>   | <b>0</b>   | <b>0</b>   | <b>0</b>   | <b>0</b>  | <b>0</b>   | <b>0</b>  | <b>0</b>   |
| archaeon GW2011_AR10                        | CP010424   | 1579370 | 1,339          | 0            | 0            | 0          | 0          | 0          | 0          | 0         | 0          | 0         | 0          |
| archaeon GW2011_AR15                        | CP010425   | 1579373 | 1,308          | 0            | 0            | 0          | 0          | 0          | 0          | 0         | 0          | 0         | 0          |
| archaeon GW2011_AR20                        | CP010426   | 1579378 | 1,010          | 0            | 0            | 0          | 0          | 0          | 0          | 0         | 0          | 0         | 0          |
| Uncultured archaeon clone ASS_A1            | CP009479   | 115547  | 1,947          | 0            | 0            | 0          | 0          | 0          | 0          | 0         | 0          | 0         | 0          |
|                                             |            |         |                |              |              |            |            |            |            |           |            |           |            |
| <b>TOTAL</b>                                | <b>218</b> |         | <b>511,588</b> | <b>2,139</b> | <b>1,875</b> | <b>740</b> | <b>102</b> | <b>445</b> | <b>141</b> | <b>33</b> | <b>110</b> | <b>81</b> | <b>222</b> |

<sup>a</sup> – Based in its 16S rRNA sequence, halophilic archaeon DL31 belongs to the family *Halorubraceae*, class *Halobacteria*.

**Table S5. Details of the sequence analysis of the newly described archaeal domains**

| Domain name | Query ID (GenBank entry, aa boundaries)                  | Program used <sup>a</sup> | Hit ID and its annotation                                                                                     | HHpred probability (Pr) or PSI-BLAST E-value (E) | Comment                                                                                                                                                                                                                                                                                                          |
|-------------|----------------------------------------------------------|---------------------------|---------------------------------------------------------------------------------------------------------------|--------------------------------------------------|------------------------------------------------------------------------------------------------------------------------------------------------------------------------------------------------------------------------------------------------------------------------------------------------------------------|
| AcidOD1     | MSA of four sequences related to ADD08891.1 (122-194 aa) | HHpred                    | PDB: 4UN1_A; Putative transcriptional regulator, AsnC family (126-165 aa)                                     | Pr= 71.79                                        | Partial overlap with the ligand binding domain of the Lrp/AsnC family regulators                                                                                                                                                                                                                                 |
| HalOD2      | ACV46423.1 (114-195 aa)                                  | HHpred                    | PF08663.9, HalX domain                                                                                        | Pr=85.79                                         | A HalX-related domain, followed by a Zn-finger                                                                                                                                                                                                                                                                   |
|             | ACV46423.1 (196-253 aa)                                  | HHpred                    | PF13240.5, Zinc-ribbon domain                                                                                 | Pr=96.38                                         |                                                                                                                                                                                                                                                                                                                  |
| MetOD1      | AAM05831.1 (133-292 aa)                                  | HHpred                    | PDB: 5FRW_A; Phenol-responsive sensory domain of PoxR. TIGR02019; BchJ; Bacteriochlorophyll 4-vinyl reductase | Pr=98.52                                         | Related to the V4R (PF02830) hydrocarbon-binding domain                                                                                                                                                                                                                                                          |
| MetOD3      | ABS55483.1 (20-200 aa)                                   | TMHMM                     | Transmembrane helix, at positions 174..196                                                                    |                                                  | Membrane-anchored Ig-like domain, possibly involved in sugar binding (lectin-like). Ig-like domains are often seen in membrane- and S-layer-associated proteins                                                                                                                                                  |
|             |                                                          | HHpred                    | PF10648.8, Gmad2; Immunoglobulin-like domain of bacterial spore germination                                   | Pr=53.38                                         |                                                                                                                                                                                                                                                                                                                  |
| NitrOD1     | AFS82515.1 (114-198 aa)                                  | PSI-BLAST                 | KEQ56625.1, AsnC family transcriptional regulator protein                                                     | E=0.67                                           | Related to the ligand binding domain of the Lrp/AsnC family regulators                                                                                                                                                                                                                                           |
| NitrOD2     | AIC16890.1 (1-100 aa)                                    | PSI-BLAST, HHPred         | AFU59294.1, hypothetical protein Ngar_c23690                                                                  | E=0.023                                          | Second iteration of the PSI-BLAST (with E=0.1 inclusion threshold) returns a hit to the Ngar_c23690 protein. When Ngar_c23690 is used as query for an HHpred search, it reveals similarity with the DUF3227 domain (Pr= 88.03%), which was recently shown to belong to the archaeal Death domain-like family (1) |
| NitrOD3     | AIF83507.1 (1-142 aa)                                    | HHpred                    | PDB: 3KYE_A; Roadblock/LC7 domain                                                                             | Pr= 68.3                                         | Related to the Roadblock/LC7 domain, expansion in Thaumarchaea                                                                                                                                                                                                                                                   |
| NitrOD4     | AFS80878.1 (1-96 aa)                                     | PSI-BLAST                 | AFU59889.1, hypothetical protein Ngar_c29710 (194-263 aa)                                                     | E=0.003                                          | Second iteration of the PSI-BLAST returns a hit to the Ngar_c29710 protein. When used as query for HHpred, this protein reveals similarity with the DUF3227 family (Pr=97%), which was recently shown to belong to the archaeal Death domain-like family (1)                                                     |

|         |                            |        |                                                                                                                 |          |                                                                                                                                    |
|---------|----------------------------|--------|-----------------------------------------------------------------------------------------------------------------|----------|------------------------------------------------------------------------------------------------------------------------------------|
| NitrOD5 | ABX12603.1<br>(127-216 aa) | HHpred | PF11537.7;<br>Protein of unknown<br>function (DUF3227)                                                          | Pr=95.52 | DUF3227 family was shown to<br>belong to archaeal Death<br>domain-like family (1)                                                  |
| TackOD1 | AFS80801.1<br>(126-318 aa) | HHPred | PDB: 2JNE_A; <i>E. coli</i><br>Yfgj bound to two Zn <sup>+2</sup> .<br>PF12773;<br>Double zinc ribbon<br>domain | Pr=97.56 | Similar to the Double zinc<br>ribbon (PF12773) domain, in<br>bacteria often fused to the<br>GGDEF (diguanylate cyclase)<br>domains |

<sup>a</sup> - PSI\_BLAST searches were run against NCBI's non-redundant protein database with the following parameters: inclusion threshold E= 0.01; taxonomy restriction: "archaea" only; no low complexity filtering; composition based statistics: off, unless stated otherwise in comments. HHpred was run with default parameters with three HHblits iterations, against PDB, Pfam and CDD database. TMHMM 2.0 was run with default parameters.

#### Reference

1. **Makarova KS, Galperin MY, Koonin EV.** 2017. Proposed role for KaiC-like ATPases as major signal transduction hubs in Archaea. mBio01959-17, in press.

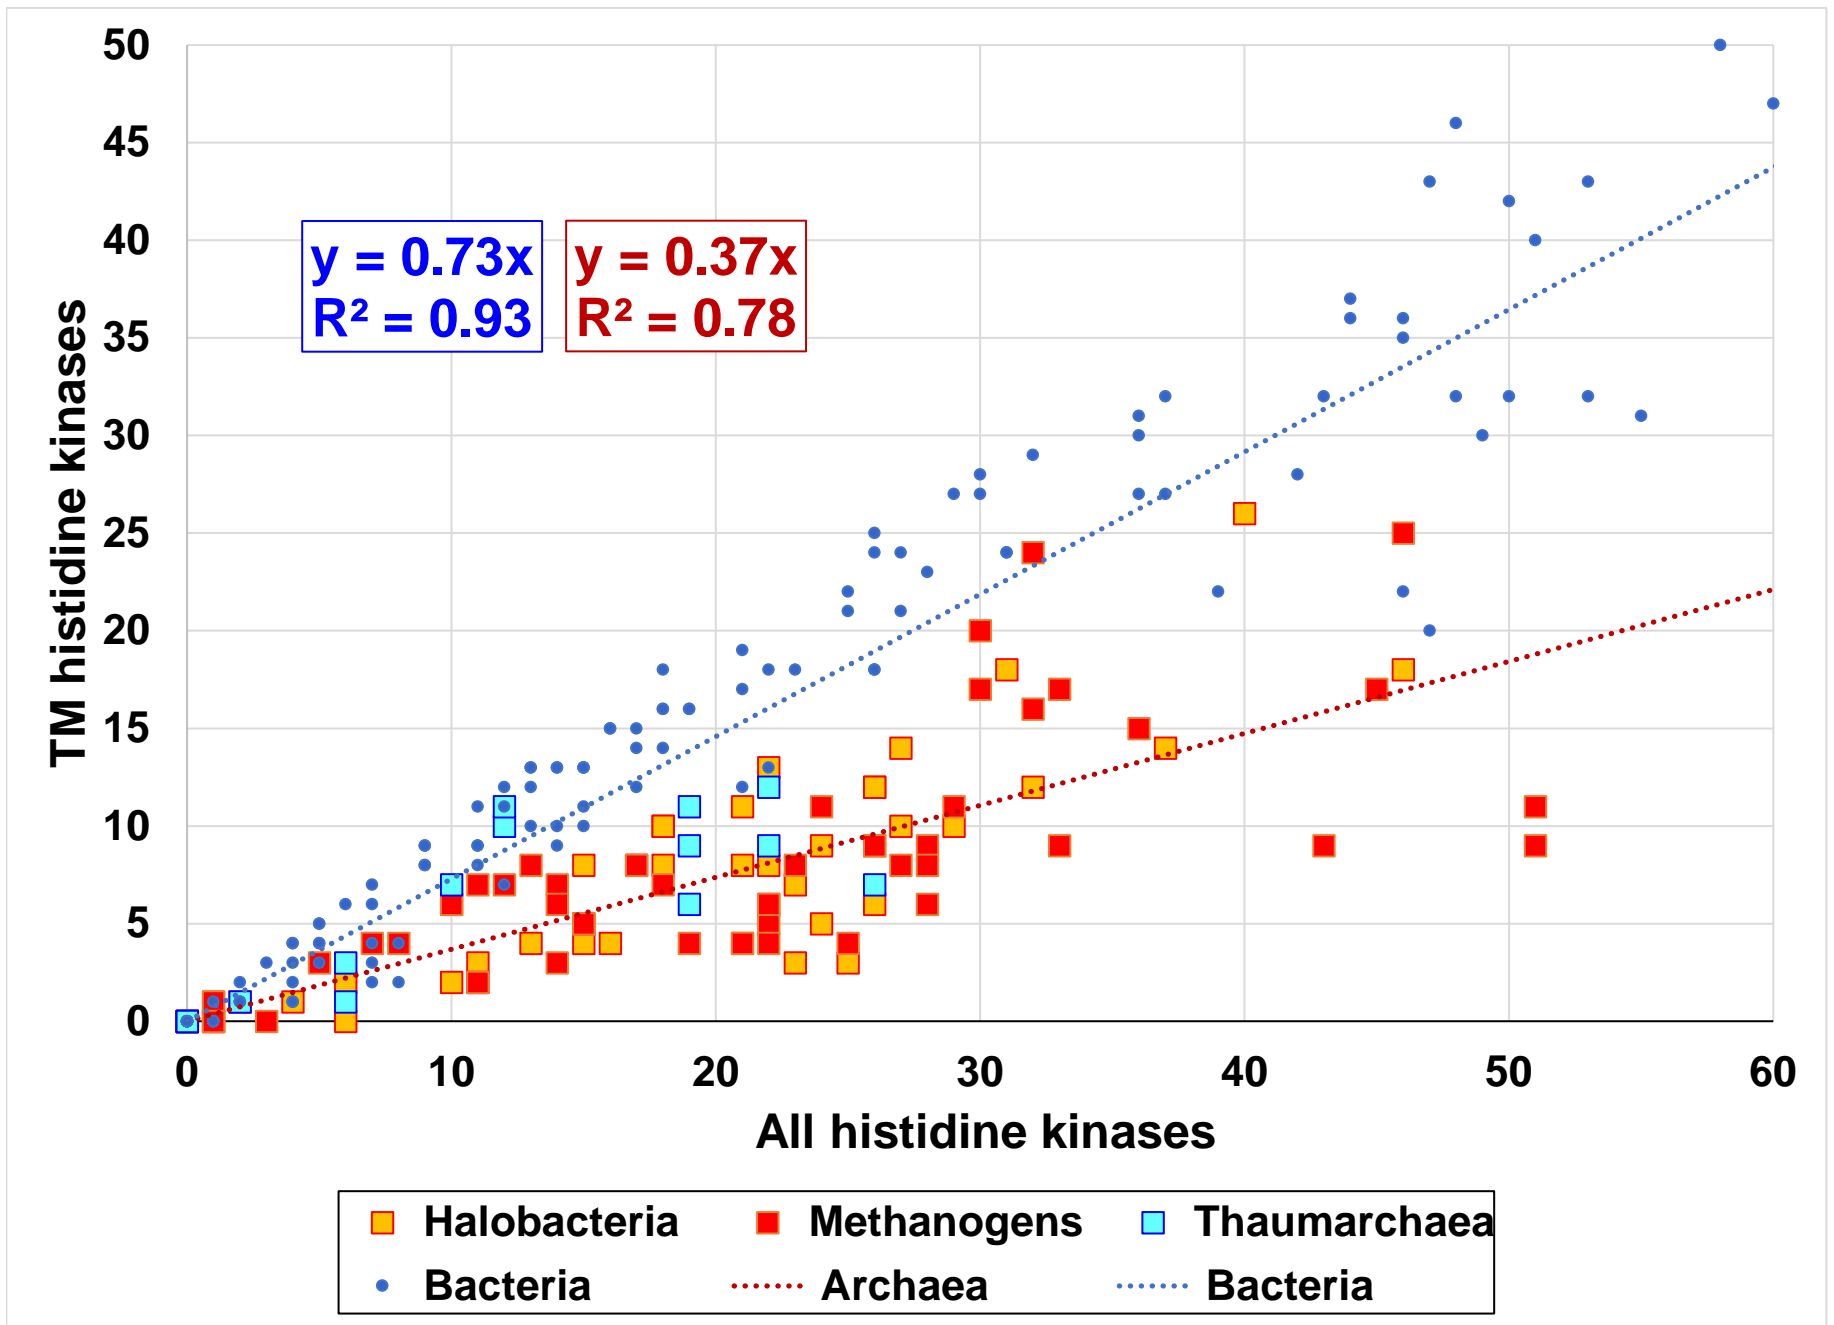

Figure S1. Transmembrane histidine kinase content in bacteria and archaea

**A**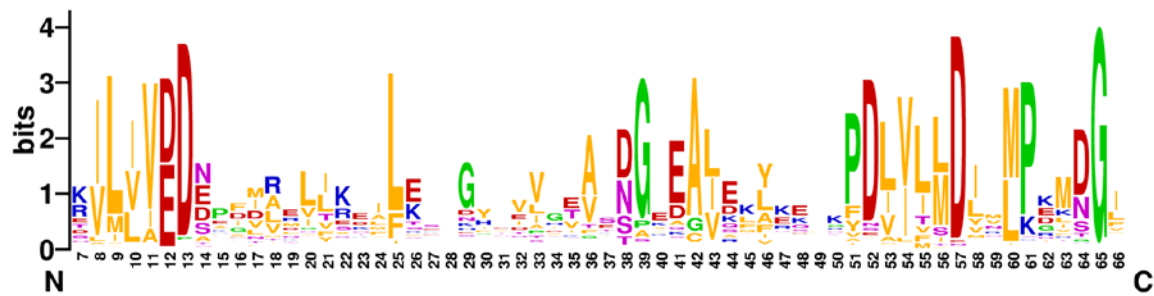**C****B**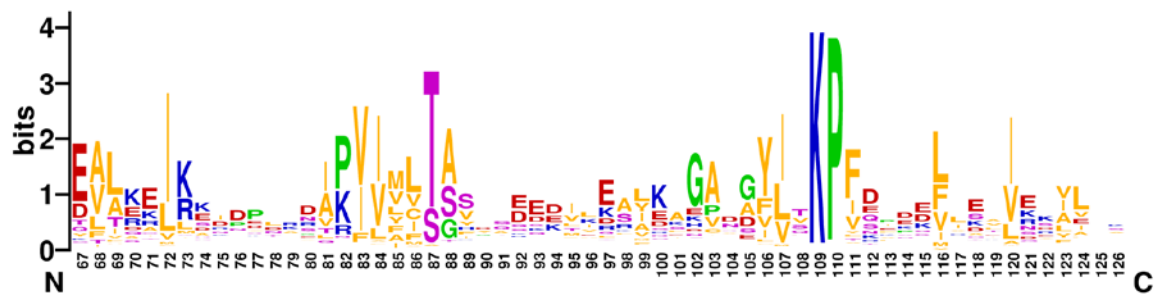**C**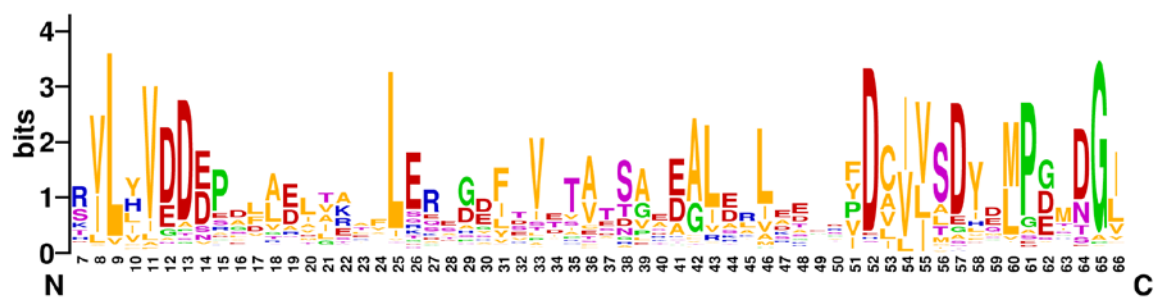**C**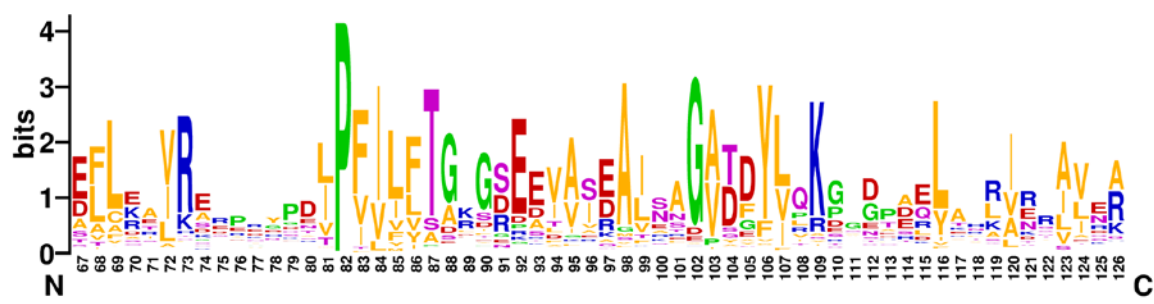**C**

**Figure S2. Sequence conservation in archaeal receiver domains.**

A, response regulators with stand-alone REC domains;  
 B, REC domains of the response regulators with the REC-(PAS/GAF)<sub>n</sub>-HisKA-HATPase domain architectures

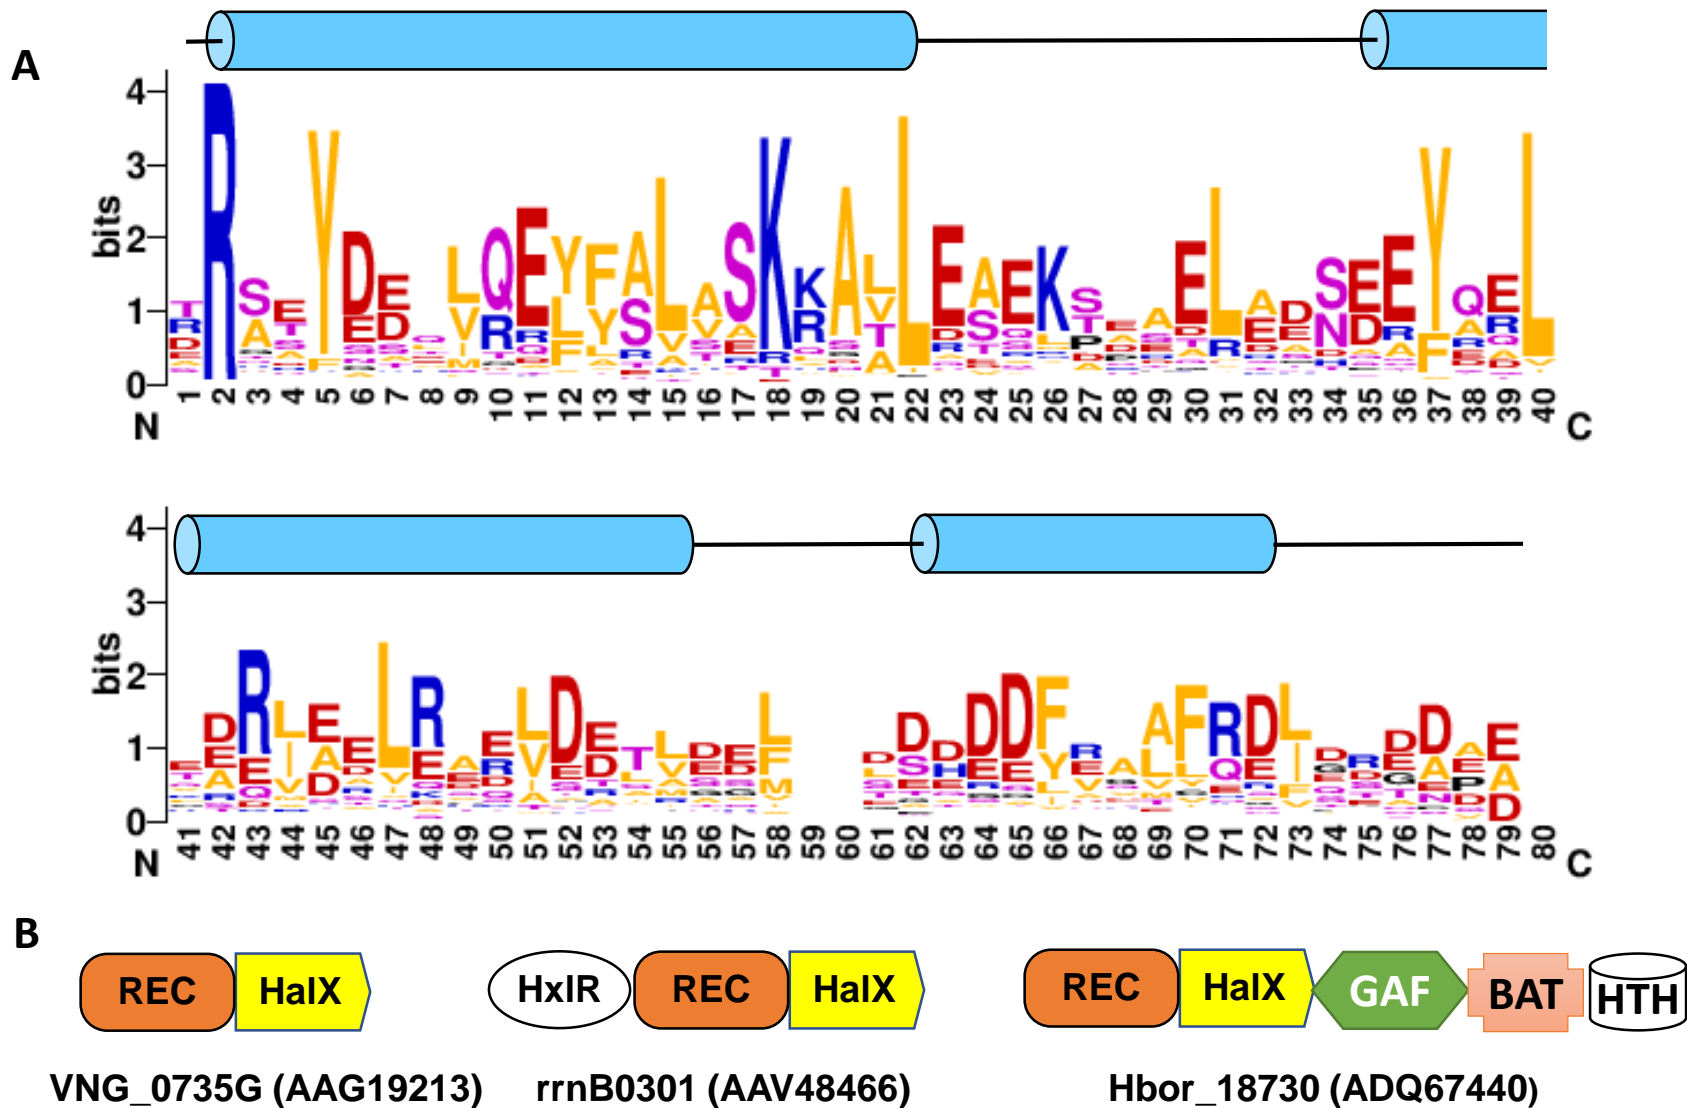

**Figure S3. Sequence conservation and domain architectures of the HalX (PF08663) domain.**  
 A. Sequence logo of HalX, blue cylinders on top indicate  $\alpha$ -helices predicted by the JPred program.  
 B. Examples of HalX domain architectures

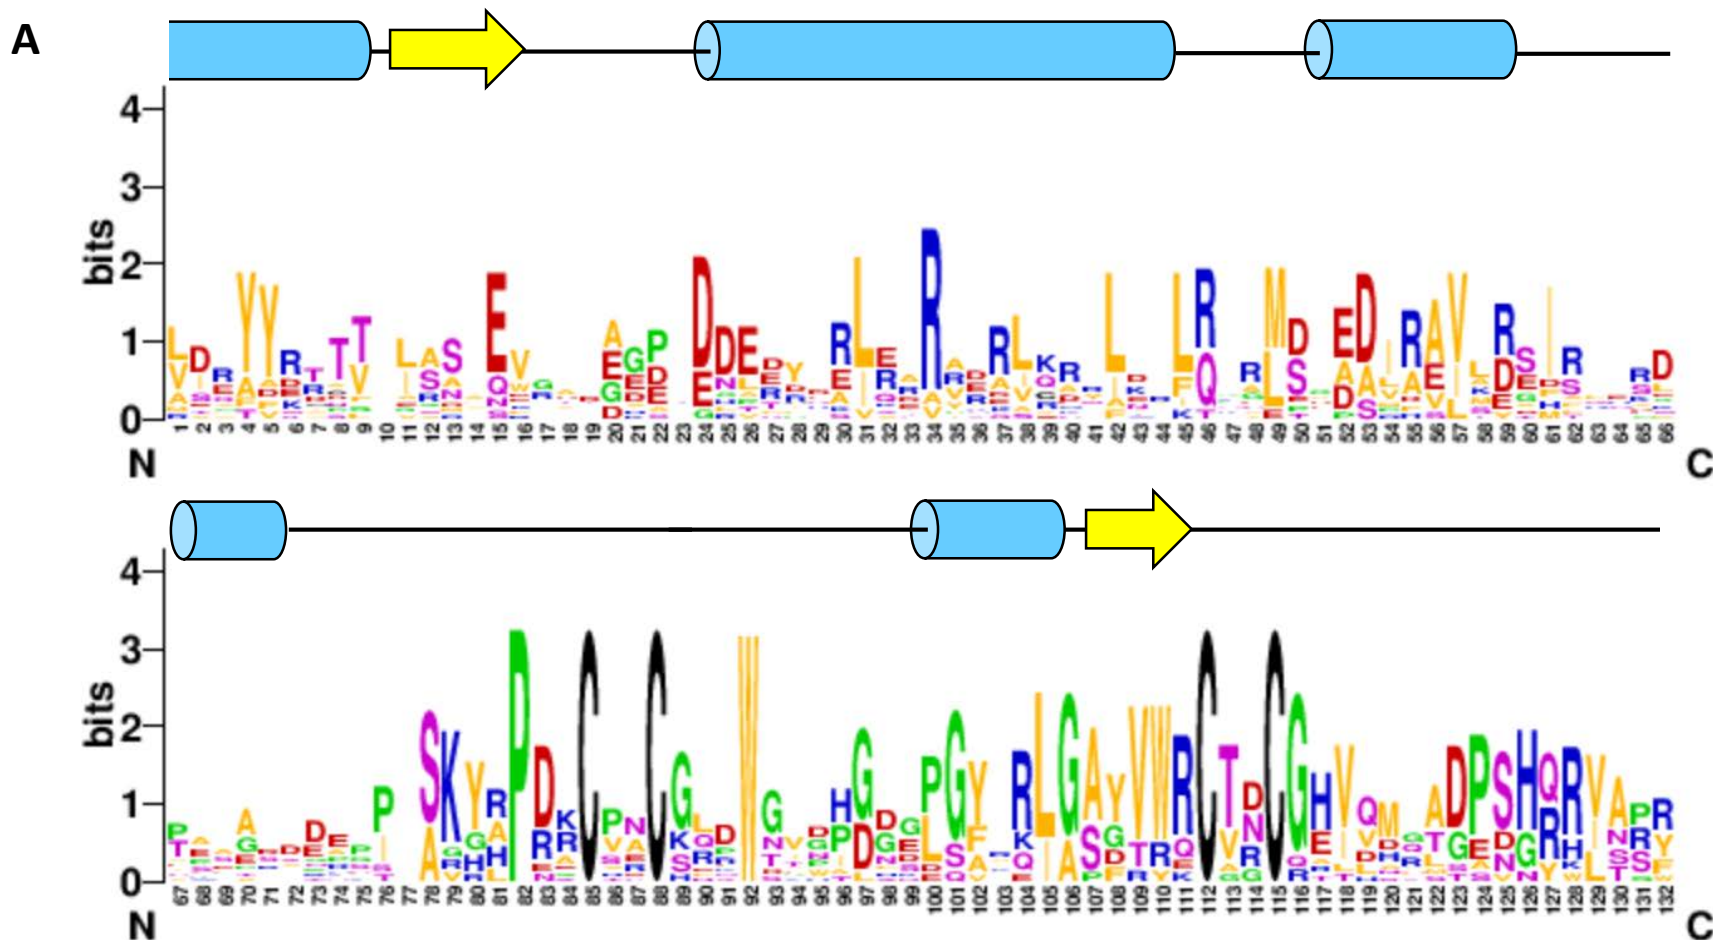

**Figure S4. Sequence conservation in the HalOD2 domain.** Residue numbering is based on the sequence of the response regulator Hmuk\_0286 from *Halomicrobium mukohataei*. Logo position 1 corresponds to Leu122 of Hmuk\_0286 (GenBank: ACV46423). Blue cylinders and yellow arrows indicate  $\alpha$ -helices and  $\beta$ -strands, respectively, predicted by the JPred program.

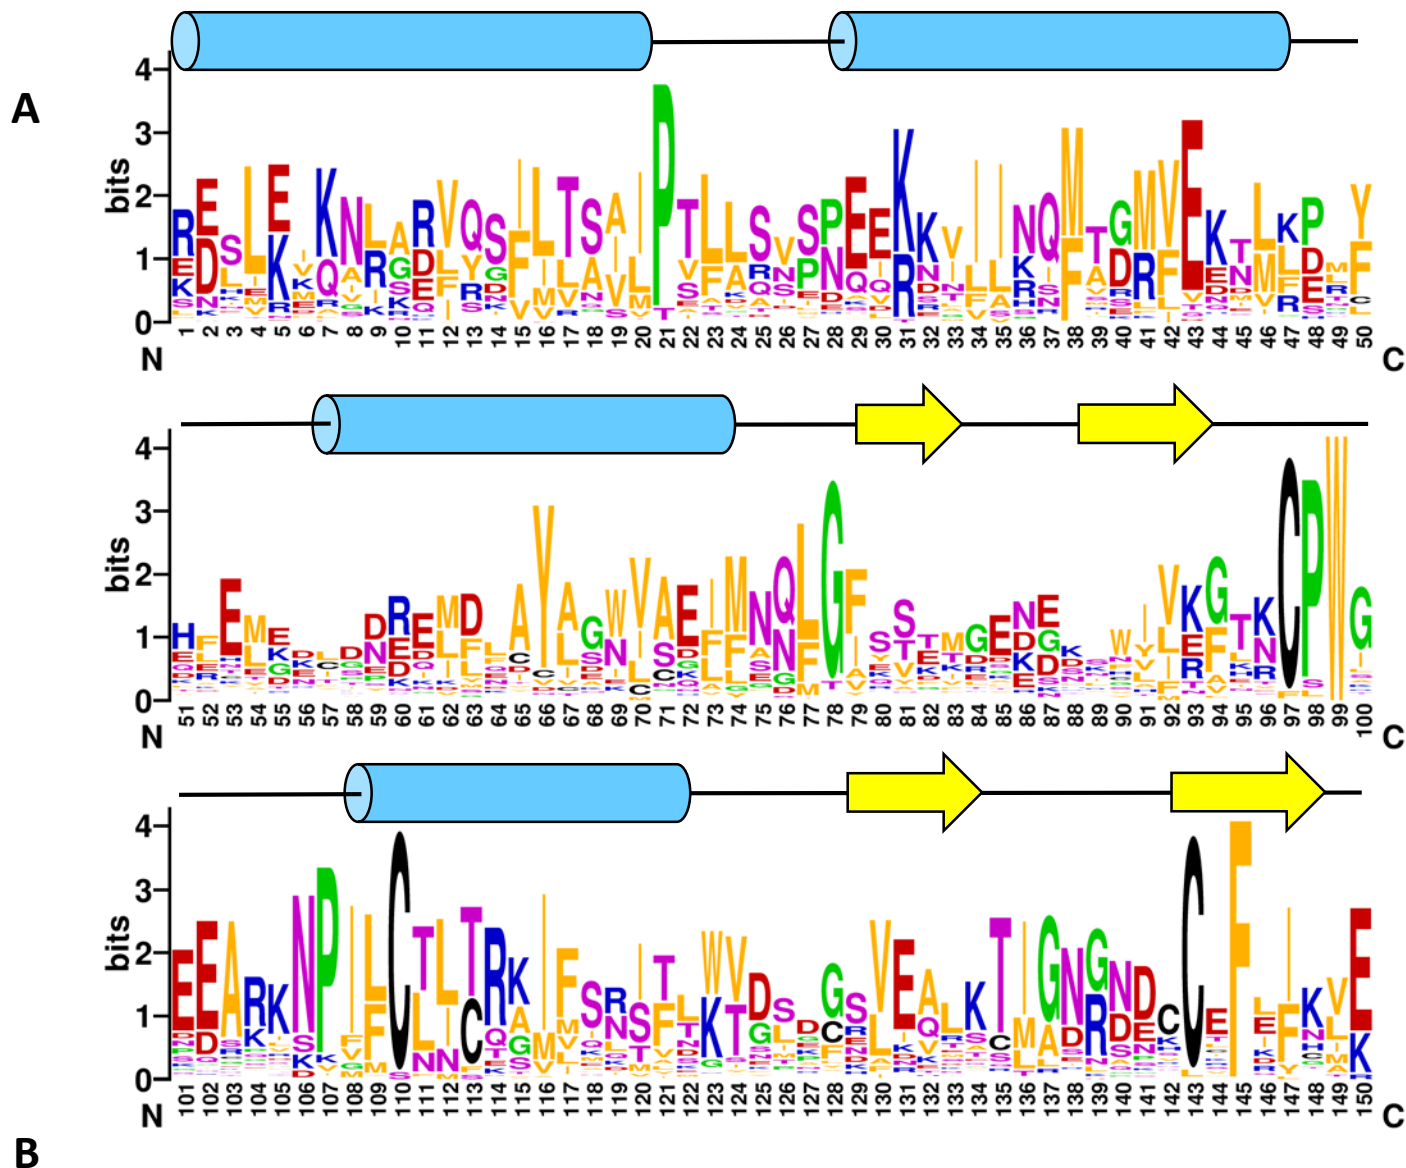

**Figure S5. Sequence conservation of the MetOD1 domain and its domain combinations.** The residue numbering is based on the sequence of MTH\_447, the first position corresponds to the Lys128 of the GenBank entry AAB84953

**MTH\_447 (AAB84953)**

**MTH\_440 (AAB84946)**

**Metev\_2349(ADI75160)**



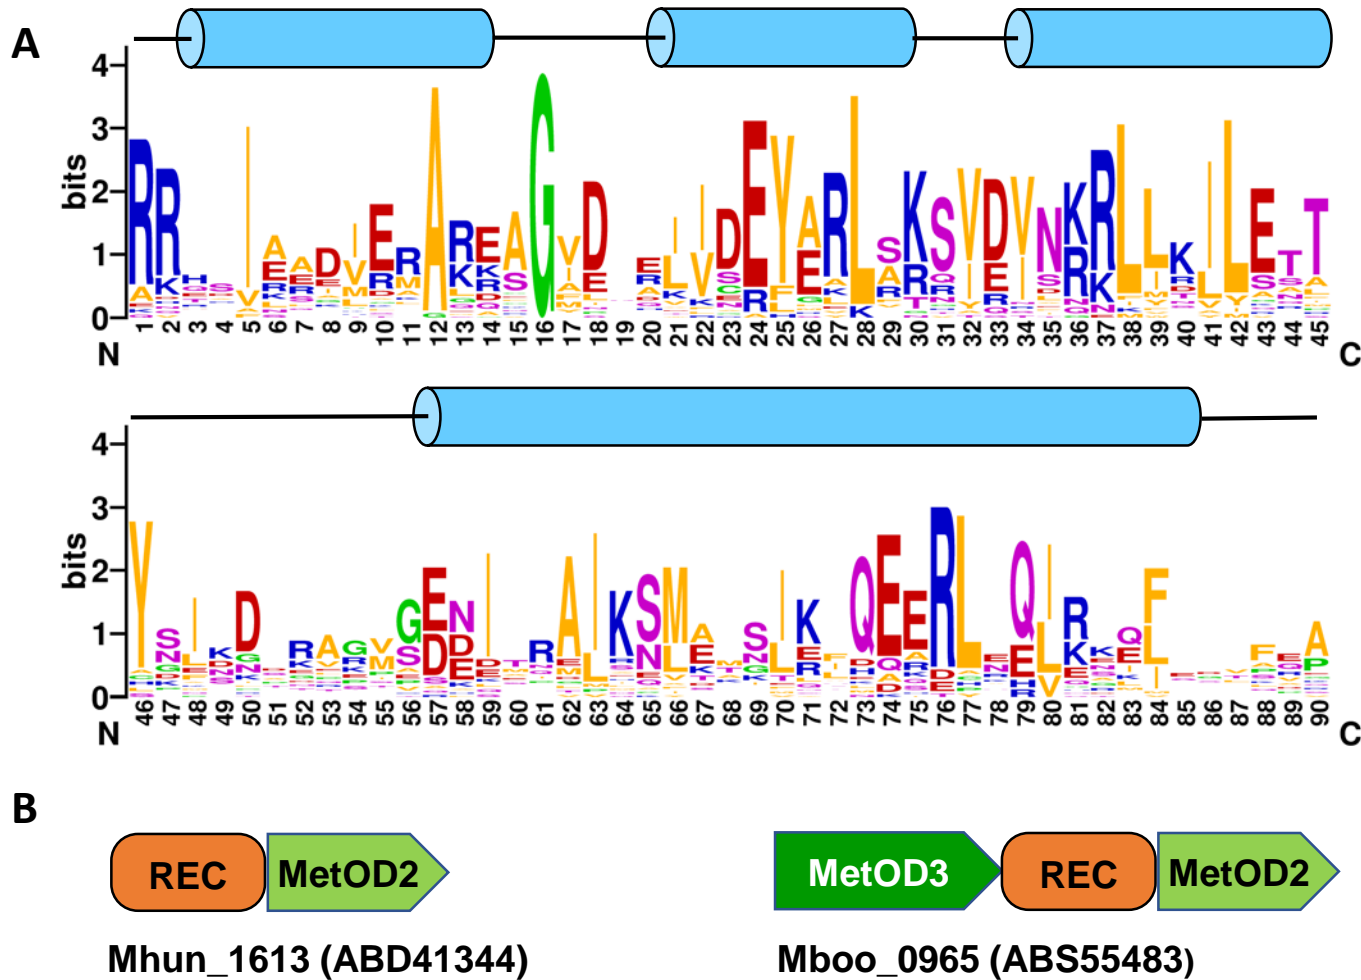

**Figure S6. Sequence conservation of the MetOD2 domain and its domain combinations.** The residue numbering is based on the sequence of Mhun\_1613, the first position corresponds to Arg124 of the GenBank entry ABD41344. The cylinders on top indicate  $\alpha$ -helices predicted by JPred.

A

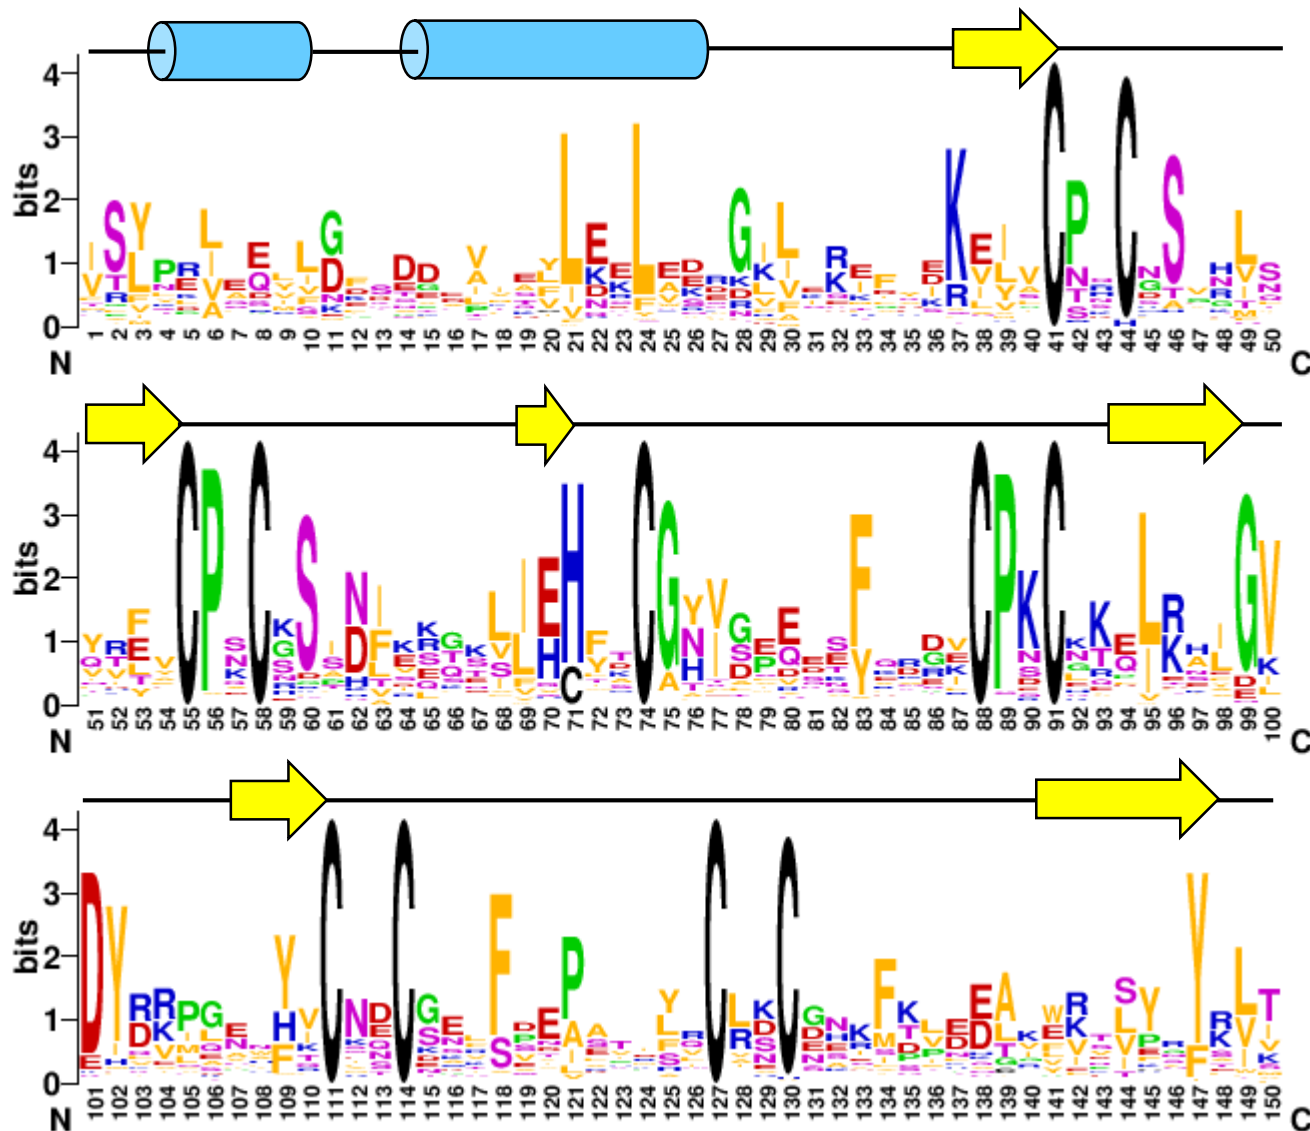

**Figure S7. Sequence conservation of the TackOD1 domain.** The residue numbering is based on the sequence of NKOR\_04565 protein from *Candidatus Nitrosopumilus koreensis* AR1, the first position corresponds to Ile167 of the GenBank entry AFS80801
