# Supplementary material for: Phyletic Distribution and Lineage-Specific Domain Architectures of Archaeal Two-Component Signal Transduction Systems
Source: PubMed Central journal article supplement (PMC5847659; doi:10.1128/jb.00681-17), 2018-03-12
Supplement: JB.00681-17_zjb999094653s2.pdf [file JB.00681-17_zjb999094653s2.pdf]

Table S2. Histidine kinases and response regulators encoded in complete genomes of [Archaea](#)

|                                                                            |                       |
|----------------------------------------------------------------------------|-----------------------|
| <b><u>Archaea</u></b>                                                      |                       |
| <b><u>Candidatus Micrarchaeota</u></b>                                     |                       |
| . <a href="#">Candidatus Micrarchaeota archaeon Mial4</a> .....            | <u>1 HK, 1 RR</u>     |
| <b><u>Candidatus Nanohaloarchaeota</u></b>                                 |                       |
| . <a href="#">Nanohaloarchaea archaeon SG9</a> .....                       | 0 hits                |
| <b><u>Candidatus Korarchaeota</u></b>                                      |                       |
| . <a href="#">Candidatus Korarchaeum cryptofilum OPF8</a> .....            | 0 hits                |
| <b><u>Crenarchaeota</u></b>                                                |                       |
| 44 completely sequenced genomes .....                                      | 0 hits                |
| <b><u>Euryarchaeota</u></b>                                                |                       |
| . <a href="#">Aciduliprofundum boonei T469</a> .....                       | <u>2 HKs, 4 RRs</u>   |
| . <a href="#">Aciduliprofundum sp. MAR08-339i</a> .....                    | <u>2 HKs, 4 RRs</u>   |
| <b><u>Archaeoglobi</u></b>                                                 |                       |
| . <a href="#">Archaeoglobus fulgidus DSM 4304</a> .....                    | <u>13 HKs, 12 RRs</u> |
| . <a href="#">Archaeoglobus profundus DSM 5631</a> .....                   | <u>3 HKs, 7 RRs</u>   |
| . <a href="#">Archaeoglobus sulfaticallidus PM70-1i</a> .....              | <u>4 HKs, 5 RRs</u>   |
| . <a href="#">Archaeoglobus veneficus SNP6i</a> .....                      | <u>4 HKs, 3 RRs</u>   |
| . <a href="#">Ferroglobus placidus DSM 10642</a> .....                     | <u>4 HKs, 4 RRs</u>   |
| . <a href="#">Geoglobus acetivorans</a> .....                              | <u>5 HKs, 8 RRs</u>   |
| . <a href="#">Geoglobus ahangari</a> .....                                 | <u>4 HKs, 3 RRs</u>   |
| <b><u>Halobacteria</u></b>                                                 |                       |
| . <a href="#">Halalkalicoccus jeotgali B3</a> .....                        | <u>6 HKs, 14 RRs</u>  |
| . <a href="#">Halanaeroarchaeum sulfurireducens</a> .....                  | <u>27 HKs, 8 RRs</u>  |
| . <a href="#">Haloarcula hispanica ATCC 33960</a> .....                    | <u>26 HKs, 35 RRs</u> |
| . <a href="#">Haloarcula marismortui ATCC 43049</a> .....                  | <u>37 HKs, 45 RRs</u> |
| . <a href="#">Haloarcula sp. CBA1115</a> .....                             | <u>26 HKs, 36 RRs</u> |
| . <a href="#">Halobacterium hubeiense</a> .....                            | <u>18 HKs, 19 RRs</u> |
| . <a href="#">Halobacterium salinarum NRC-1</a> .....                      | <u>11 HKs, 9 RRs</u>  |
| . <a href="#">Halobacterium sp. DL1</a> .....                              | <u>18 HKs, 17 RRs</u> |
| . <a href="#">Halobiforma lacisalsi AJ5</a> .....                          | <u>25 HKs, 22 RRs</u> |
| . <a href="#">Halodesulfurarchaeum formicicum</a> .....                    | <u>15 HKs, 6 RRs</u>  |
| . <a href="#">Haloferax gibbonsii ARA6</a> .....                           | <u>27 HKs, 22 RRs</u> |
| . <a href="#">Haloferax mediterranei ATCC 33500</a> .....                  | <u>22 HKs, 14 RRs</u> |
| . <a href="#">Haloferax volcanii DS2</a> .....                             | <u>15 HKs, 22 RRs</u> |
| . <a href="#">Halogeometricum borinquense DSM 11551</a> .....              | <u>21 HKs, 25 RRs</u> |
| . <a href="#">Halomicrobium mukohataei DSM 12286</a> .....                 | <u>21 HKs, 24 RRs</u> |
| . <a href="#">Halopiger xanaduensis SH-6</a> .....                         | <u>26 HKs, 18 RRs</u> |
| . <a href="#">Haloquadratum walsbyi DSM 16790</a> .....                    | <u>4 HKs, 5 RRs</u>   |
| . <a href="#">Halorhabdus tiamatea SARL4B</a> .....                        | <u>18 HKs, 17 RRs</u> |
| . <a href="#">Halorhabdus utahensis DSM 12940</a> .....                    | <u>31 HKs, 29 RRs</u> |
| . <a href="#">Halorientalis sp. IM1011</a> .....                           | <u>40 HKs, 29 RRs</u> |
| . <a href="#">Halorubrum lacusprofundi ATCC 49239</a> .....                | <u>32 HKs, 9 RRs</u>  |
| . <a href="#">Halostagnicola larsenii XH-48</a> .....                      | <u>11 HKs, 15 RRs</u> |
| . <a href="#">Haloterrigena daqingensis</a> .....                          | <u>15 HKs, 16 RRs</u> |
| . <a href="#">Haloterrigena turkmenica DSM 5511</a> .....                  | <u>46 HKs, 30 RRs</u> |
| . <a href="#">Halovivax ruber XH-70</a> .....                              | <u>17 HKs, 10 RRs</u> |
| . <a href="#">Natrialba magadii ATCC 43099</a> .....                       | <u>16 HKs, 23 RRs</u> |
| . <a href="#">Natrialbaceae archaeon JW/NM-HA 15</a> .....                 | <u>29 HKs, 22 RRs</u> |
| . <a href="#">Natrinema pellirubrum DSM 15624</a> .....                    | <u>22 HKs, 18 RRs</u> |
| . <a href="#">Natrinema sp. J7-2</a> .....                                 | <u>10 HKs, 15 RRs</u> |
| . <a href="#">Natronobacterium gregoryi SP2</a> .....                      | <u>6 HKs, 15 RRs</u>  |
| . <a href="#">Natronococcus occultus SP4</a> .....                         | <u>23 HKs, 25 RRs</u> |
| . <a href="#">Natronomonas moolapensis 8.8.11</a> .....                    | <u>24 HKs, 26 RRs</u> |
| . <a href="#">Natronomonas pharaonis DSM 2160</a> .....                    | <u>24 HKs, 22 RRs</u> |
| . <a href="#">Salinararchaeum sp. Harcht-Bsk1</a> .....                    | <u>23 HKs, 16 RRs</u> |
| . <a href="#">halophilic archaeon DL31</a> .....                           | <u>13 HKs, 6 RRs</u>  |
| <b><u>Methanobacteria</u></b>                                              |                       |
| . <a href="#">Methanobacterium congolense</a> .....                        | <u>10 HKs, 9 RRs</u>  |
| . <a href="#">Methanobacterium formicicum BRM9</a> .....                   | <u>23 HKs, 35 RRs</u> |
| . <a href="#">Methanobacterium lacus AL-21</a> .....                       | <u>29 HKs, 33 RRs</u> |
| . <a href="#">Methanobacterium paludis SWAN1</a> .....                     | <u>10 HKs, 7 RRs</u>  |
| . <a href="#">Methanobacterium sp. MBl</a> .....                           | <u>14 HKs, 18 RRs</u> |
| . <a href="#">Methanobrevibacter millerae</a> .....                        | <u>3 HKs, 2 RRs</u>   |
| . <a href="#">Methanobrevibacter olleyae</a> .....                         | 0 hits                |
| . <a href="#">Methanobrevibacter ruminantium M1</a> .....                  | 0 hits                |
| . <a href="#">Methanobrevibacter smithii ATCC 35061</a> .....              | 0 hits                |
| . <a href="#">Methanobrevibacter sp. AbM4</a> .....                        | <u>1 HK, 4 RRs</u>    |
| . <a href="#">Methanobrevibacter sp. YE315</a> .....                       | 0 hits                |
| . <a href="#">Methanosphaera stadtmanae DSM 3091</a> .....                 | 0 hits                |
| . <a href="#">Methanothermobacter marburgensis str. Marburg</a> .....      | <u>11 HKs, 11 RRs</u> |
| . <a href="#">Methanothermobacter thermoautotrophicus str. Delta H</a> ... | <u>12 HKs, 8 RRs</u>  |
| . <a href="#">Methanothermobacter wolfeii</a> .....                        | <u>13 HKs, 10 RRs</u> |
| . <a href="#">Methanothermobacter sp. CaT2</a> .....                       | <u>14 HKs, 10 RRs</u> |
| . <a href="#">Methanothermus fervidus DSM 2088</a> .....                   | 0 hits                |
| <b><u>Methanococci</u></b>                                                 |                       |
| . <a href="#">Methanocaldococcus bathoardescens</a> .....                  | <u>1 HK, 2 RRs</u>    |

|                                                              |                |
|--------------------------------------------------------------|----------------|
| · <a href="#">Methanocaldococcus fervens</a> AG86            | 2 HKs, 3 RRs   |
| · <a href="#">Methanocaldococcus infernus</a> ME             | 1 HK, 2 RRs    |
| · <a href="#">Methanocaldococcus jannaschii</a> DSM 2661     | 0 hits         |
| · <a href="#">Methanocaldococcus</a> sp. FS406-22            | 1 HK, 1 RR     |
| · <a href="#">Methanocaldococcus vulcanius</a> M7            | 1 HK, 2 RRs    |
| · <a href="#">Methanococcus aeolicus</a> Nankai-3            | 1 HK, 1 RR     |
| · <a href="#">Methanococcus maripaludis</a> S2               | 3 HKs, 3 RRs   |
| · <a href="#">Methanococcus vanniellii</a> SB                | 5 HKs, 3 RRs   |
| · <a href="#">Methanococcus voltae</a> A3                    | 2 HKs, 3 RRs   |
| · <a href="#">Methanothermococcus okinawensis</a>            | 2 HKs, 3 RRs   |
| · <a href="#">Methanotorris igneus</a>                       | 0 hits         |
| <b><u>Methanomicrobia</u></b>                                |                |
| · <a href="#">Methanocella arvoryzae</a> MRE50               | 45 HKs, 14 RRs |
| · <a href="#">Methanocella conradii</a> H2254                | 19 HKs, 9 RRs  |
| · <a href="#">Methanocella paludicola</a> SANAE              | 51 HKs, 7 RRs  |
| · <a href="#">Methanococcoides burtonii</a> DSM 6242         | 26 HKs, 18 RRs |
| · <a href="#">Methanococcoides methylutens</a> MM1           | 27 HKs, 12 RRs |
| · <a href="#">Methanocorpusculum labreanum</a> Z             | 1 HK, 1 RR     |
| · <a href="#">Methanoculleus bourgensis</a> MS2              | 14 HKs, 5 RRs  |
| · <a href="#">Methanoculleus marisnigri</a> JR1              | 24 HKs, 7 RRs  |
| · <a href="#">Methanoculleus</a> sp. MAB1                    | 15 HKs, 4 RRs  |
| · <a href="#">Methanofollis liminatans</a> DSM 4140          | 17 HKs, 18 RRs |
| · <a href="#">Methanohalobium evestigatum</a> Z-7303         | 28 HKs, 11 RRs |
| · <a href="#">Methanohalophilus halophilus</a> strain Z-7982 | 26 HKs, 12 RRs |
| · <a href="#">Methanohalophilus mahii</a> DSM 5219           | 22 HKs, 11 RRs |
| · <a href="#">Methanolacinia petrolearia</a> DSM 11571       | 32 HKs, 19 RRs |
| · <a href="#">Methanolobus psychrophilus</a> R15             | 36 HKs, 18 RRs |
| · <a href="#">Methanomethylovorans hollandica</a> DSM 15978  | 11 HKs, 8 RRs  |
| · <a href="#">Methanoplanus limicola</a> DSM 2279            | 32 HKs, 30 RRs |
| · <a href="#">Methanoregula boonei</a> 6A8                   | 30 HKs, 63 RRs |
| · <a href="#">Methanoregula formicica</a>                    | 30 HKs, 38 RRs |
| · <a href="#">Methanosaeta concilii</a> GP6                  | 8 HKs, 4 RRs   |
| · <a href="#">Methanosaeta harundinacea</a>                  | 2 HKs, 6 RRs   |
| · <a href="#">Methanosaeta thermophila</a> PT                | 7 HKs, 4 RRs   |
| · <a href="#">Methanosalsum zhilinae</a>                     | 28 HKs, 9 RRs  |
| · <a href="#">Methanosarcina acetivorans</a> C2A             | 51 HKs, 15 RRs |
| · <a href="#">Methanosarcina barkeri</a> str. fusaro         | 25 HKs, 11 RRs |
| · <a href="#">Methanosarcina horonobensis</a>                | 67 HKs, 9 RRs  |
| · <a href="#">Methanosarcina lacustris</a>                   | 18 HKs, 16 RRs |
| · <a href="#">Methanosarcina mazei</a> Gol                   | 33 HKs, 14 RRs |
| · <a href="#">Methanosarcina siciliae</a>                    | 43 HKs, 16 RRs |
| · <a href="#">Methanosarcina</a> sp. 795                     | 15 HKs, 14 RRs |
| · <a href="#">Methanosarcina</a> sp. Kolksee                 | 21 HKs, 16 RRs |
| · <a href="#">Methanosarcina</a> sp. MTP4                    | 28 HKs, 16 RRs |
| · <a href="#">Methanosarcina</a> sp. WH1                     | 22 HKs, 15 RRs |
| · <a href="#">Methanosarcina</a> sp. WWM596                  | 22 HKs, 16 RRs |
| · <a href="#">Methanosarcina thermophila</a> CHTI-55         | 21 HKs, 16 RRs |
| · <a href="#">Methanosarcina vacuolata</a> Z-761             | 22 HKs, 14 RRs |
| · <a href="#">Methanosphaerula palustris</a> EI-9c           | 33 HKs, 44 RRs |
| · <a href="#">Methanospirillum hungatei</a> JF-1             | 46 HKs, 87 RRs |
| <b><u>Methanopyri</u></b>                                    |                |
| · <a href="#">Methanopyrus kandleri</a> AV19                 | 0 hits         |
| <b><u>Thermococci</u></b>                                    |                |
| · <a href="#">Palaeococcus pacificus</a> DY20341             | 1 HK, 2 RRs    |
| · <a href="#">Pyrococcus abyssi</a> GE5                      | 1 HK, 2 RRs    |
| · <a href="#">Pyrococcus furiosus</a> DSM 3638               | 0 hits         |
| · <a href="#">Pyrococcus horikoshii</a> OT3                  | 1 HK, 2 RRs    |
| · <a href="#">Pyrococcus kukulkanii</a>                      | 1 HK, 2 RRs    |
| · <a href="#">Pyrococcus</a> sp. NA2                         | 1 HK, 2 RRs    |
| · <a href="#">Pyrococcus</a> sp. ST04                        | 1 HK, 2 RRs    |
| · <a href="#">Pyrococcus yayanosii</a> CH1                   | 1 HK, 2 RRs    |
| · <a href="#">Thermococcus barophilus</a>                    | 1 HK, 2 RRs    |
| · <a href="#">Thermococcus chitonophagus</a>                 | 0 hits         |
| · <a href="#">Thermococcus cleftensis</a>                    | 0 hits         |
| · <a href="#">Thermococcus eurythermalis</a>                 | 1 HK, 2 RRs    |
| · <a href="#">Thermococcus gammatolerans</a> EJ3             | 1 HK, 1 RR     |
| · <a href="#">Thermococcus guaymasensis</a> DSM 11113        | 1 HK, 1 RR     |
| · <a href="#">Thermococcus kodakarensis</a> KOD1             | 1 HK, 2 RRs    |
| · <a href="#">Thermococcus litoralis</a> DSM 5473            | 1 HK, 2 RRs    |
| · <a href="#">Thermococcus nautili</a>                       | 1 HK, 2 RRs    |
| · <a href="#">Thermococcus onnurineus</a> NA1                | 1 HK, 2 RRs    |
| · <a href="#">Thermococcus paralvinellae</a>                 | 0 hits         |
| · <a href="#">Thermococcus peptonophilus</a> JCM 9653        | 1 HK, 2 RRs    |
| · <a href="#">Thermococcus piezophilus</a>                   | 0 hits         |
| · <a href="#">Thermococcus sibiricus</a> MM 739              | 0 hits         |
| · <a href="#">Thermococcus</a> sp. 2319x1                    | 0 hits         |
| · <a href="#">Thermococcus</a> sp. 4557                      | 0 hits         |
| · <a href="#">Thermococcus</a> sp. AM4                       | 1 HK, 1 RR     |
| <b><u>Thermoplasmata</u></b>                                 |                |

|                                                                            |                |
|----------------------------------------------------------------------------|----------------|
| . <a href="#">Ca. Methanomassiliicoccus intestinalis Issoire-Mx1</a> ..... | 0 hits         |
| . <a href="#">Ca. Methanomethylophilus alvus Mx1201</a> .....              | 0 HKs, 1 RR    |
| . <a href="#">Ca. Methanoplasma termitum MpT1</a> .....                    | 0 HKs, 1 RR    |
| . <a href="#">Cuniculiplasma divulgatum</a> .....                          | 0 hits         |
| . <a href="#">Ferroplasma acidarmanus fer1</a> .....                       | 0 hits         |
| . <a href="#">Ferroplasma acidiphilum</a> .....                            | 0 hits         |
| . <a href="#">methanogenic archaeon ISO4-H5</a> .....                      | 3 HKs, 1 RR    |
| . <a href="#">Picrophilus torridus DSM 9790</a> .....                      | 0 hits         |
| . <a href="#">Thermoplasma acidophilum DSM 1728</a> .....                  | 0 hits         |
| . <a href="#">Thermoplasma volcanium GSS1</a> .....                        | 0 hits         |
| . <a href="#">Thermoplasmatales archaeon BRNA1</a> .....                   | 0 HKs, 1 RR    |
| <b><u>unclassified Euryarchaeota</u></b>                                   |                |
| . <a href="#">uncultured marine group II euryarchaeote</a> .....           | 0 HKs, 3 RRs   |
| <b><u>Nanoarchaeota</u></b>                                                |                |
| . <a href="#">Ca. Nanopusillus acidilobi</a> .....                         | 0 hits         |
| . <a href="#">Nanoarchaeum equitans Kin4-M</a> .....                       | 0 hits         |
| <b><u>Thaumarchaeota</u></b>                                               |                |
| . <a href="#">Ca. Caldiarchaeum subterraneum</a> .....                     | 0 hits         |
| . <a href="#">Ca. Nitrocosmicus oleophilus</a> .....                       | 22 HKs, 24 RRs |
| . <a href="#">Ca. Nitrosoarchaeum limnia SFB1</a> .....                    | 26 HKs, 33 RRs |
| . <a href="#">Ca. Nitrosomarinus catalina</a> .....                        | 0 hits         |
| . <a href="#">Ca. Nitrosopelagicus brevis</a> .....                        | 0 hits         |
| . <a href="#">Ca. Nitrosopumilus adriaticus</a> .....                      | 16 HKs, 34 RRs |
| . <a href="#">Ca. Nitrosopumilus koreensis AR1</a> .....                   | 12 HKs, 15 RRs |
| . <a href="#">Ca. Nitrosopumilus piranensis</a> .....                      | 2 HKs, 3 RRs   |
| . <a href="#">Ca. Nitrosopumilus sediminis</a> .....                       | 6 HKs, 10 RRs  |
| . <a href="#">Ca. Nitrososphaera evergladensis SR1</a> .....               | 19 HKs, 19 RRs |
| . <a href="#">Ca. Nitrososphaera gargensis Ga9.2</a> .....                 | 19 HKs, 31 RRs |
| . <a href="#">Ca. Nitrosotalea devanaterrea</a> .....                      | 18 HKs, 19 RRs |
| . <a href="#">Ca. Nitrosotenuis cloacae strain SAT1</a> .....              | 6 HKs, 15 RRs  |
| . <a href="#">Cenarchaeum symbiosum</a> .....                              | 0 hits         |
| . <a href="#">Nitrosopumilus maritimus SCM1</a> .....                      | 11 HKs, 10 RRs |
| . <a href="#">Nitrososphaera viennensis EN76</a> .....                     | 10 HKs, 11 RRs |
| <b><u>Unclassified archaea</u></b>                                         |                |
| . <a href="#">archaeon GW2011 AR10</a> .....                               | 0 hits         |
| . <a href="#">archaeon GW2011 AR15</a> .....                               | 0 hits         |
| . <a href="#">archaeon GW2011 AR20</a> .....                               | 0 hits         |
| . <a href="#">uncultured archaeon clone ASS A1</a> .....                   | 0 hits         |

Hybrid histidine kinases, containing the REC domain at their C-termini, are counted as HKs; REC-HisK combinations with REC domains on their N-termini (with or without central PAS and/or GAF domains) are counted as RRs.

Proteins marked with \* indicate inactivated or truncated REC domains, not included in the total count

#### **Candidatus Micrarchaeota**

##### **Candidatus Micrarchaeota archaeon Mia14**

#### **HisK, no REC**

Mia14\_0098 [AS113441](#) GAF nad PAS sensor-containing signal trans... [CDD](#) [UniProt](#) [Pfam](#) [InterPro](#)

#### **wHTH-REC**

Mia14\_0100 [AS113443](#) response regulator receiver [Candidatus Mi... [CDD](#) [UniProt](#) [Pfam](#) [InterPro](#) (wHTH-REC-bGlyc)

#### **Euryarchaeota**

##### **Aciduliprofundum boonei T469**

#### **HisKin**

Aboo\_0120 [ADD07932](#) response regulator receiver protein [Acidul... [CDD](#) [UniProt](#) [Pfam](#) [InterPro](#)

Aboo\_0497 [ADD08308](#) response regulator receiver protein [Acidul... [CDD](#) [UniProt](#) [Pfam](#) [InterPro](#)

#### **REC only**

Aboo\_0851 [ADD08660](#) response regulator receiver protein [Acidul... [CDD](#) [UniProt](#) [Pfam](#) [InterPro](#)

Aboo\_1193 [ADD09002](#) response regulator receiver protein [Acidul... [CDD](#) [UniProt](#) [Pfam](#) [InterPro](#)

Aboo\_1536 [ADD09342](#) response regulator receiver protein [Acidul... [CDD](#) [UniProt](#) [Pfam](#) [InterPro](#)

#### **Other RRs**

Aboo\_1082 [ADD08891](#) response regulator receiver protein [Acidul... [CDD](#) [UniProt](#) [Pfam](#) [InterPro](#) (REC-AcidOD1)

##### **Aciduliprofundum sp. MAR08-339**

#### **HisKin**

AciM339\_0928 [AGB04801](#) response regulator receiver protein [Aci... [CDD](#) [UniProt](#) [Pfam](#) [InterPro](#)

AciM339\_1357 [AGB05216](#) response regulator receiver protein [Aci... [CDD](#) [UniProt](#) [Pfam](#) [InterPro](#)

#### **REC only**

AciM339\_0598 [AGB04482](#) response regulator with CheY-like receiv... [CDD](#) [UniProt](#) [Pfam](#) [InterPro](#)

AciM339\_1529 [AGB05382](#) response regulator containing CheY-like ... [CDD](#) [UniProt](#) [Pfam](#) [InterPro](#)

AciM339\_1569 [AGB05418](#) response regulator with CheY-like receiv... [CDD](#) [UniProt](#) [Pfam](#) [InterPro](#)

\*AciM339\_1015 [AGB04887](#) response regulator with CheY-like receiv... [CDD](#) [UniProt](#) [Pfam](#) [InterPro](#)

#### **Other RRs**

AciM339\_1390 [AGB05246](#) response regulator with CheY-like receiv... [CDD](#) [UniProt](#) [Pfam](#) [InterPro](#) (REC-AcidOD1)

### Archaeoglobus fulgidus DSM 4304

#### HisK, no REC

|          |                          |                                               |                     |                         |                      |                          |
|----------|--------------------------|-----------------------------------------------|---------------------|-------------------------|----------------------|--------------------------|
| AF_0021  | <a href="#">AAB91205</a> | signal-transducing histidine kinase [Archa... | <a href="#">CDD</a> | <a href="#">UniProt</a> | <a href="#">Pfam</a> | <a href="#">InterPro</a> |
| AF_0208  | <a href="#">AAB91025</a> | signal-transducing histidine kinase [Archa... | <a href="#">CDD</a> | <a href="#">UniProt</a> | <a href="#">Pfam</a> | <a href="#">InterPro</a> |
| AF_0450  | <a href="#">AAB90782</a> | signal-transducing histidine kinase [Archa... | <a href="#">CDD</a> | <a href="#">UniProt</a> | <a href="#">Pfam</a> | <a href="#">InterPro</a> |
| AF_0770  | <a href="#">AAB90464</a> | signal-transducing histidine kinase [Archa... | <a href="#">CDD</a> | <a href="#">UniProt</a> | <a href="#">Pfam</a> | <a href="#">InterPro</a> |
| AF_0893  | <a href="#">AAB90347</a> | signal-transducing histidine kinase [Archa... | <a href="#">CDD</a> | <a href="#">UniProt</a> | <a href="#">Pfam</a> | <a href="#">InterPro</a> |
| AF_1040  | <a href="#">AAB90200</a> | chemotaxis histidine kinase (cheA) [Archae... | <a href="#">CDD</a> | <a href="#">UniProt</a> | <a href="#">Pfam</a> | <a href="#">InterPro</a> |
| AF_1184  | <a href="#">AAB90059</a> | signal-transducing histidine kinase [Archa... | <a href="#">CDD</a> | <a href="#">UniProt</a> | <a href="#">Pfam</a> | <a href="#">InterPro</a> |
| AF_1452  | <a href="#">AAB89797</a> | signal-transducing histidine kinase [Archa... | <a href="#">CDD</a> | <a href="#">UniProt</a> | <a href="#">Pfam</a> | <a href="#">InterPro</a> |
| AF_1515  | <a href="#">AAB89730</a> | signal-transducing histidine kinase [Archa... | <a href="#">CDD</a> | <a href="#">UniProt</a> | <a href="#">Pfam</a> | <a href="#">InterPro</a> |
| AF_1639  | <a href="#">AAB89602</a> | signal-transducing histidine kinase [Archa... | <a href="#">CDD</a> | <a href="#">UniProt</a> | <a href="#">Pfam</a> | <a href="#">InterPro</a> |
| AF_1721  | <a href="#">AAB89530</a> | signal-transducing histidine kinase [Archa... | <a href="#">CDD</a> | <a href="#">UniProt</a> | <a href="#">Pfam</a> | <a href="#">InterPro</a> |
| AF_2032  | <a href="#">AAB89224</a> | signal-transducing histidine kinase, putat... | <a href="#">CDD</a> | <a href="#">UniProt</a> | <a href="#">Pfam</a> | <a href="#">InterPro</a> |
| AF_2109  | <a href="#">AAB89139</a> | signal-transducing histidine kinase [Archa... | <a href="#">CDD</a> | <a href="#">UniProt</a> | <a href="#">Pfam</a> | <a href="#">InterPro</a> |
| *AF_0881 |                          | (not translated, marked as frameshifted)      |                     |                         |                      |                          |

#### HisKA, no HATPase

|         |                          |                                               |                     |                         |                      |                          |
|---------|--------------------------|-----------------------------------------------|---------------------|-------------------------|----------------------|--------------------------|
| AF_0277 | <a href="#">AAB90955</a> | signal-transducing histidine kinase, putat... | <a href="#">CDD</a> | <a href="#">UniProt</a> | <a href="#">Pfam</a> | <a href="#">InterPro</a> |
| AF_0410 | <a href="#">AAB90824</a> | signal-transducing histidine kinase, putat... | <a href="#">CDD</a> | <a href="#">UniProt</a> | <a href="#">Pfam</a> | <a href="#">InterPro</a> |
| AF_0448 | <a href="#">AAB90784</a> | signal-transducing histidine kinase, putat... | <a href="#">CDD</a> | <a href="#">UniProt</a> | <a href="#">Pfam</a> | <a href="#">InterPro</a> |
| AF_1035 | <a href="#">AAB90205</a> | chemotaxis histidine kinase, putative [Arc... | <a href="#">CDD</a> | <a href="#">UniProt</a> | <a href="#">Pfam</a> | <a href="#">InterPro</a> |
| AF_1046 | <a href="#">AAB90196</a> | predicted coding region AF_1046 [Archaeogl... | <a href="#">CDD</a> | <a href="#">UniProt</a> | <a href="#">Pfam</a> | <a href="#">InterPro</a> |
| AF_1766 | <a href="#">AAB89485</a> | amino-acid ABC transporter, periplasmic bi... | <a href="#">CDD</a> | <a href="#">UniProt</a> | <a href="#">Pfam</a> | <a href="#">InterPro</a> |
| AF_2420 | <a href="#">AAB91242</a> | signal-transducing histidine kinase, putat... | <a href="#">CDD</a> | <a href="#">UniProt</a> | <a href="#">Pfam</a> | <a href="#">InterPro</a> |

#### REC only

|         |                          |                                                |                     |                         |                      |                          |
|---------|--------------------------|------------------------------------------------|---------------------|-------------------------|----------------------|--------------------------|
| AF_0449 | <a href="#">AAB90783</a> | response regulator [Archaeoglobus fulgidus...] | <a href="#">CDD</a> | <a href="#">UniProt</a> | <a href="#">Pfam</a> | <a href="#">InterPro</a> |
| AF_1042 | <a href="#">AAB90207</a> | chemotaxis response regulator (cheY) [Arch...  | <a href="#">CDD</a> | <a href="#">UniProt</a> | <a href="#">Pfam</a> | <a href="#">InterPro</a> |
| AF_1063 | <a href="#">AAB90176</a> | response regulator [Archaeoglobus fulgidus...] | <a href="#">CDD</a> | <a href="#">UniProt</a> | <a href="#">Pfam</a> | <a href="#">InterPro</a> |
| AF_1256 | <a href="#">AAB89986</a> | response regulator [Archaeoglobus fulgidus...] | <a href="#">CDD</a> | <a href="#">UniProt</a> | <a href="#">Pfam</a> | <a href="#">InterPro</a> |
| AF_1384 | <a href="#">AAB89861</a> | response regulator [Archaeoglobus fulgidus...] | <a href="#">CDD</a> | <a href="#">UniProt</a> | <a href="#">Pfam</a> | <a href="#">InterPro</a> |
| AF_1473 | <a href="#">AAB89775</a> | response regulator [Archaeoglobus fulgidus...] | <a href="#">CDD</a> | <a href="#">UniProt</a> | <a href="#">Pfam</a> | <a href="#">InterPro</a> |
| AF_1898 | <a href="#">AAB89351</a> | response regulator [Archaeoglobus fulgidus...] | <a href="#">CDD</a> | <a href="#">UniProt</a> | <a href="#">Pfam</a> | <a href="#">InterPro</a> |
| AF_2249 | <a href="#">AAB89010</a> | response regulator [Archaeoglobus fulgidus...] | <a href="#">CDD</a> | <a href="#">UniProt</a> | <a href="#">Pfam</a> | <a href="#">InterPro</a> |
| AF_2419 | <a href="#">AAB91243</a> | response regulator [Archaeoglobus fulgidus...] | <a href="#">CDD</a> | <a href="#">UniProt</a> | <a href="#">Pfam</a> | <a href="#">InterPro</a> |

#### REC-HisK

|         |                          |                                              |                     |                         |                      |                          |
|---------|--------------------------|----------------------------------------------|---------------------|-------------------------|----------------------|--------------------------|
| AF_1483 | <a href="#">AAB89763</a> | signal-transducing histidine kinase [Archa.. | <a href="#">CDD</a> | <a href="#">UniProt</a> | <a href="#">Pfam</a> | <a href="#">InterPro</a> |
|---------|--------------------------|----------------------------------------------|---------------------|-------------------------|----------------------|--------------------------|

#### REC-CheB

|         |                          |                                               |                     |                         |                      |                          |
|---------|--------------------------|-----------------------------------------------|---------------------|-------------------------|----------------------|--------------------------|
| AF_1041 | <a href="#">AAB90199</a> | protein-glutamate methylesterase [Archaeog... | <a href="#">CDD</a> | <a href="#">UniProt</a> | <a href="#">Pfam</a> | <a href="#">InterPro</a> |
|---------|--------------------------|-----------------------------------------------|---------------------|-------------------------|----------------------|--------------------------|

#### Other RRs

|         |                          |                                               |                     |                         |                      |                          |                     |
|---------|--------------------------|-----------------------------------------------|---------------------|-------------------------|----------------------|--------------------------|---------------------|
| AF_1472 | <a href="#">AAB89776</a> | signal-transducing histidine kinase [Archa... | <a href="#">CDD</a> | <a href="#">UniProt</a> | <a href="#">Pfam</a> | <a href="#">InterPro</a> | (REC-PAS-GAF-HisKA) |
|---------|--------------------------|-----------------------------------------------|---------------------|-------------------------|----------------------|--------------------------|---------------------|

### Archaeoglobus profundus DSM 5631

#### HisK, no REC

|            |                          |                                               |                     |                         |                      |                          |
|------------|--------------------------|-----------------------------------------------|---------------------|-------------------------|----------------------|--------------------------|
| Arcpr_0538 | <a href="#">ADB57604</a> | PAS/PAC sensor signal transduction histidi... | <a href="#">CDD</a> | <a href="#">UniProt</a> | <a href="#">Pfam</a> | <a href="#">InterPro</a> |
| Arcpr_0624 | <a href="#">ADB57689</a> | PAS/PAC sensor signal transduction histidi... | <a href="#">CDD</a> | <a href="#">UniProt</a> | <a href="#">Pfam</a> | <a href="#">InterPro</a> |
| Arcpr_1374 | <a href="#">ADB58423</a> | CheA signal transduction histidine kinase ... | <a href="#">CDD</a> | <a href="#">UniProt</a> | <a href="#">Pfam</a> | <a href="#">InterPro</a> |

#### REC only

|            |                          |                                               |                     |                         |                      |                          |
|------------|--------------------------|-----------------------------------------------|---------------------|-------------------------|----------------------|--------------------------|
| Arcpr_0537 | <a href="#">ADB57603</a> | response regulator receiver protein [Archa... | <a href="#">CDD</a> | <a href="#">UniProt</a> | <a href="#">Pfam</a> | <a href="#">InterPro</a> |
| Arcpr_0540 | <a href="#">ADB57606</a> | response regulator receiver protein [Archa... | <a href="#">CDD</a> | <a href="#">UniProt</a> | <a href="#">Pfam</a> | <a href="#">InterPro</a> |
| Arcpr_0996 | <a href="#">ADB58057</a> | response regulator receiver protein [Archa... | <a href="#">CDD</a> | <a href="#">UniProt</a> | <a href="#">Pfam</a> | <a href="#">InterPro</a> |
| Arcpr_1376 | <a href="#">ADB58425</a> | response regulator receiver protein [Archa... | <a href="#">CDD</a> | <a href="#">UniProt</a> | <a href="#">Pfam</a> | <a href="#">InterPro</a> |

#### REC-CheB

|            |                          |                                               |                     |                         |                      |                          |
|------------|--------------------------|-----------------------------------------------|---------------------|-------------------------|----------------------|--------------------------|
| Arcpr_1375 | <a href="#">ADB58424</a> | response regulator receiver protein [Archa... | <a href="#">CDD</a> | <a href="#">UniProt</a> | <a href="#">Pfam</a> | <a href="#">InterPro</a> |
|------------|--------------------------|-----------------------------------------------|---------------------|-------------------------|----------------------|--------------------------|

#### Other RRs

|            |                          |                                               |                     |                         |                      |                          |             |
|------------|--------------------------|-----------------------------------------------|---------------------|-------------------------|----------------------|--------------------------|-------------|
| Arcpr_0541 | <a href="#">ADB57607</a> | response regulator receiver modulated CheB... | <a href="#">CDD</a> | <a href="#">UniProt</a> | <a href="#">Pfam</a> | <a href="#">InterPro</a> | (REC-HisKA) |
| Arcpr_1453 | <a href="#">ADB58501</a> | putative PAS/PAC sensor protein [Archaeogl... | <a href="#">CDD</a> | <a href="#">UniProt</a> | <a href="#">Pfam</a> | <a href="#">InterPro</a> | (REC-HisKA) |

### Archaeoglobus sulfaticallidus PM70-1

#### HisK, no REC

|             |                          |                                              |                     |                         |                      |                          |
|-------------|--------------------------|----------------------------------------------|---------------------|-------------------------|----------------------|--------------------------|
| Asulf_01122 | <a href="#">AGK61122</a> | PAS domain S-box [Archaeoglobus sulfatica... | <a href="#">CDD</a> | <a href="#">UniProt</a> | <a href="#">Pfam</a> | <a href="#">InterPro</a> |
| Asulf_01671 | <a href="#">AGK61644</a> | PAS domain S-box [Archaeoglobus sulfatica... | <a href="#">CDD</a> | <a href="#">UniProt</a> | <a href="#">Pfam</a> | <a href="#">InterPro</a> |
| Asulf_01711 | <a href="#">AGK61682</a> | PAS domain S-box [Archaeoglobus sulfatica... | <a href="#">CDD</a> | <a href="#">UniProt</a> | <a href="#">Pfam</a> | <a href="#">InterPro</a> |
| Asulf_01766 | <a href="#">AGK61737</a> | hypothetical protein Asulf_01766 [Archaeo... | <a href="#">CDD</a> | <a href="#">UniProt</a> | <a href="#">Pfam</a> | <a href="#">InterPro</a> |

#### HisKA, no HATPase

|             |                          |                                              |                     |                         |                      |                          |
|-------------|--------------------------|----------------------------------------------|---------------------|-------------------------|----------------------|--------------------------|
| Asulf_00181 | <a href="#">AGK60216</a> | PAS domain S-box [Archaeoglobus sulfatica... | <a href="#">CDD</a> | <a href="#">UniProt</a> | <a href="#">Pfam</a> | <a href="#">InterPro</a> |
| Asulf_01632 | <a href="#">AGK61607</a> | PAS domain S-box [Archaeoglobus sulfatica... | <a href="#">CDD</a> | <a href="#">UniProt</a> | <a href="#">Pfam</a> | <a href="#">InterPro</a> |
| Asulf_01672 | <a href="#">AGK61645</a> | PAS domain S-box [Archaeoglobus sulfatica... | <a href="#">CDD</a> | <a href="#">UniProt</a> | <a href="#">Pfam</a> | <a href="#">InterPro</a> |
| Asulf_01680 | <a href="#">AGK61652</a> | PAS domain S-box [Archaeoglobus sulfatica... | <a href="#">CDD</a> | <a href="#">UniProt</a> | <a href="#">Pfam</a> | <a href="#">InterPro</a> |
| Asulf_02212 | <a href="#">AGK62165</a> | PAS domain S-box [Archaeoglobus sulfatica... | <a href="#">CDD</a> | <a href="#">UniProt</a> | <a href="#">Pfam</a> | <a href="#">InterPro</a> |

#### REC only

|              |                          |                                              |                     |                         |                      |                          |
|--------------|--------------------------|----------------------------------------------|---------------------|-------------------------|----------------------|--------------------------|
| Asulf_01219  | <a href="#">AGK61217</a> | hypothetical protein Asulf_01219 [Archaeo... | <a href="#">CDD</a> | <a href="#">UniProt</a> | <a href="#">Pfam</a> | <a href="#">InterPro</a> |
| Asulf_01271  | <a href="#">AGK61267</a> | hypothetical protein Asulf_01271 [Archaeo... | <a href="#">CDD</a> | <a href="#">UniProt</a> | <a href="#">Pfam</a> | <a href="#">InterPro</a> |
| Asulf_01865  | <a href="#">AGK61833</a> | hypothetical protein Asulf_01865 [Archaeo... | <a href="#">CDD</a> | <a href="#">UniProt</a> | <a href="#">Pfam</a> | <a href="#">InterPro</a> |
| Asulf_02176  | <a href="#">AGK62129</a> | hypothetical protein Asulf_02176 [Archaeo... | <a href="#">CDD</a> | <a href="#">UniProt</a> | <a href="#">Pfam</a> | <a href="#">InterPro</a> |
| *Asulf_00749 | <a href="#">AGK60762</a> | hypothetical protein Asulf_00749 [Archaeo... | <a href="#">CDD</a> | <a href="#">UniProt</a> | <a href="#">Pfam</a> | <a href="#">InterPro</a> |

#### Other RRs

Asulf\_00750 [AGK60763](#) PAS domain S-box [Archaeoglobus sulfatica... [CDD](#) [UniProt](#) [Pfam](#) [InterPro](#) (REC-PAS-PAS-PAS-GAF-HisKA)

---

#### Archaeoglobus veneficus SNP6

##### HisK, no REC

Arcve\_0187 [AEA46226](#) PAS/PAC sensor signal transduction histidi... [CDD](#) [UniProt](#) [Pfam](#) [InterPro](#)  
Arcve\_0189 [AEA46228](#) PAS/PAC sensor signal transduction histidi... [CDD](#) [UniProt](#) [Pfam](#) [InterPro](#)  
Arcve\_0380 [AEA46413](#) PAS/PAC sensor signal transduction histidi... [CDD](#) [UniProt](#) [Pfam](#) [InterPro](#)  
Arcve\_1463 [AEA47466](#) CheA signal transduction histidine kinase ... [CDD](#) [UniProt](#) [Pfam](#) [InterPro](#)

##### HisKA, no HATPase

Arcve\_0186 [AEA46225](#) PAS sensor protein [Archaeoglobus veneficu... [CDD](#) [UniProt](#) [Pfam](#) [InterPro](#)  
Arcve\_0534 [AEA46561](#) PAS sensor protein [Archaeoglobus veneficu... [CDD](#) [UniProt](#) [Pfam](#) [InterPro](#)

##### REC only

Arcve\_0190 [AEA46229](#) response regulator receiver protein [Archa... [CDD](#) [UniProt](#) [Pfam](#) [InterPro](#)  
Arcve\_1461 [AEA47464](#) response regulator receiver protein [Archa... [CDD](#) [UniProt](#) [Pfam](#) [InterPro](#)

##### REC-CheB

Arcve\_1462 [AEA47465](#) response regulator receiver modulated CheB... [CDD](#) [UniProt](#) [Pfam](#) [InterPro](#)

---

#### Candidatus Methanomassiliicoccus intestinalis Issoire-Mx1

##### Other RRs

\*MMINT\_05120 [AGN25892](#) PAS domain S-box [Candidatus Methanomassi... [CDD](#) [UniProt](#) [Pfam](#) [InterPro](#)

---

#### Candidatus Methanomethylophilus alvus Mx1201

##### Other RRs

MMALV\_04780 [AGI85220](#) hypothetical protein MMALV\_04780 [Candida... [CDD](#) [UniProt](#) [Pfam](#) [InterPro](#) (REC-xDUF835)

---

#### Candidatus Methanoplasma termitum

##### Other RRs

Mpt1\_c03930 [AIZ56287](#) regulator of Rpos [Candidatus Methanoplas... [CDD](#) [UniProt](#) [Pfam](#) [InterPro](#) (REC-DUF835)

---

#### Ferroglobus placidus DSM 10642

##### HisK, no REC

Ferp\_0280 [ADC64461](#) integral membrane sensor signal transducti... [CDD](#) [UniProt](#) [Pfam](#) [InterPro](#)  
Ferp\_1075 [ADC65234](#) CheA signal transduction histidine kinase ... [CDD](#) [UniProt](#) [Pfam](#) [InterPro](#)  
Ferp\_1359 [ADC65510](#) PAS/PAC sensor signal transduction histidi... [CDD](#) [UniProt](#) [Pfam](#) [InterPro](#)  
Ferp\_1726 [ADC65870](#) PAS/PAC sensor signal transduction histidi... [CDD](#) [UniProt](#) [Pfam](#) [InterPro](#)

##### HisKA, no HATPase

Ferp\_1360 [ADC65511](#) putative PAS/PAC sensor protein [Ferroglob... [CDD](#) [UniProt](#) [Pfam](#) [InterPro](#)

##### REC only

Ferp\_0251 [ADC64433](#) response regulator receiver protein [Ferrog... [CDD](#) [UniProt](#) [Pfam](#) [InterPro](#)  
Ferp\_1077 [ADC65236](#) response regulator receiver protein [Ferrog... [CDD](#) [UniProt](#) [Pfam](#) [InterPro](#)  
Ferp\_1725 [ADC65869](#) response regulator receiver protein [Ferrog... [CDD](#) [UniProt](#) [Pfam](#) [InterPro](#)

##### REC-CheB

Ferp\_1076 [ADC65235](#) response regulator protein-glutamate methyl... [CDD](#) [UniProt](#) [Pfam](#) [InterPro](#)

---

#### Geoglobus acetivorans

##### HisK, no REC

GACE\_0482 [AIY89536](#) signal-transducing histidine kinase [Geogl... [CDD](#) [UniProt](#) [Pfam](#) [InterPro](#)  
GACE\_0668 [AIY89720](#) Signal transduction histidine kinase CheA ... [CDD](#) [UniProt](#) [Pfam](#) [InterPro](#)  
GACE\_1270 [AIY90311](#) signal-transducing histidine kinase [Geogl... [CDD](#) [UniProt](#) [Pfam](#) [InterPro](#)  
GACE\_1553 [AIY90588](#) signal-transducing histidine kinase [Geogl... [CDD](#) [UniProt](#) [Pfam](#) [InterPro](#)  
GACE\_1579 [AIY90614](#) signal-transducing histidine kinase [Geogl... [CDD](#) [UniProt](#) [Pfam](#) [InterPro](#)

##### HisKA, no HATPase

GACE\_0662 [AIY89714](#) hypothetical protein GACE\_0662 [Geoglobus ... [CDD](#) [UniProt](#) [Pfam](#) [InterPro](#)  
GACE\_0824 [AIY89873](#) signal-transducing histidine kinase, putat... [CDD](#) [UniProt](#) [Pfam](#) [InterPro](#)  
GACE\_0973 [AIY90019](#) signal-transducing histidine kinase, putat... [CDD](#) [UniProt](#) [Pfam](#) [InterPro](#)  
GACE\_1241 [AIY90280](#) signal-transducing histidine kinase, putat... [CDD](#) [UniProt](#) [Pfam](#) [InterPro](#)  
GACE\_1965 [AIY90990](#) histidine kinase [Geoglobus acetivorans] ... [CDD](#) [UniProt](#) [Pfam](#) [InterPro](#)

##### REC only

GACE\_0483 [AIY89537](#) Signal transduction response regulator [Geo... [CDD](#) [UniProt](#) [Pfam](#) [InterPro](#)  
GACE\_0624 [AIY89676](#) Signal transduction response regulator [Geo... [CDD](#) [UniProt](#) [Pfam](#) [InterPro](#)  
GACE\_0666 [AIY89718](#) Chemotaxis regulator [Geoglobus acetivorans... [CDD](#) [UniProt](#) [Pfam](#) [InterPro](#)  
GACE\_0823 [AIY89872](#) Signal transduction response regulator [Geo... [CDD](#) [UniProt](#) [Pfam](#) [InterPro](#)  
GACE\_0970 [AIY90016](#) Signal transduction response regulator [Geo... [CDD](#) [UniProt](#) [Pfam](#) [InterPro](#)  
GACE\_1067 [AIY90111](#) Chemotaxis regulator [Geoglobus acetivorans... [CDD](#) [UniProt](#) [Pfam](#) [InterPro](#)  
GACE\_1240 [AIY90279](#) Signal transduction response regulator [Geo... [CDD](#) [UniProt](#) [Pfam](#) [InterPro](#)

##### REC-CheB

GACE\_0667 [AIY89719](#) Chemotaxis response regulator protein-gluta... [CDD](#) [UniProt](#) [Pfam](#) [InterPro](#)

---

#### Geoglobus ahangari

##### HisK, no REC

GAH\_00133 [AKG92508](#) Signal transduction histidine kinase [Geog... [CDD](#) [UniProt](#) [Pfam](#) [InterPro](#)

---

|                         |                          |                                                |     |                         |                      |                          |
|-------------------------|--------------------------|------------------------------------------------|-----|-------------------------|----------------------|--------------------------|
| GAH_00453               | <a href="#">AKG92195</a> | Signal transduction histidine kinase [Geog...  | CDD | <a href="#">UniProt</a> | <a href="#">Pfam</a> | <a href="#">InterPro</a> |
| GAH_01483               | <a href="#">AKG91226</a> | Signal transduction histidine kinase [Geog...  | CDD | <a href="#">UniProt</a> | <a href="#">Pfam</a> | <a href="#">InterPro</a> |
| GAH_01739               | <a href="#">AKG90980</a> | PAS domain S-box [Geoglobus ahangari] ...      | CDD | <a href="#">UniProt</a> | <a href="#">Pfam</a> | <a href="#">InterPro</a> |
| <b>HisK, no HATPase</b> |                          |                                                |     |                         |                      |                          |
| GAH_00707               | <a href="#">AKG91958</a> | ABC-type amino acid transport [Geoglobus a...  | CDD | <a href="#">UniProt</a> | <a href="#">Pfam</a> | <a href="#">InterPro</a> |
| <b>REC only</b>         |                          |                                                |     |                         |                      |                          |
| GAH_01741               | <a href="#">AKG90978</a> | Response regulator receiver domain [Geoglog... | CDD | <a href="#">UniProt</a> | <a href="#">Pfam</a> | <a href="#">InterPro</a> |
| GAH_01904               | <a href="#">AKG90820</a> | Response regulator receiver domain [Geoglog... | CDD | <a href="#">UniProt</a> | <a href="#">Pfam</a> | <a href="#">InterPro</a> |
| GAH_01962               | <a href="#">AKG90765</a> | Response regulator receiver domain [Geoglog... | CDD | <a href="#">UniProt</a> | <a href="#">Pfam</a> | <a href="#">InterPro</a> |

### Halalkalicoccus jeotgali B3

|                      |                          |                                             |     |                         |                      |                                          |
|----------------------|--------------------------|---------------------------------------------|-----|-------------------------|----------------------|------------------------------------------|
| <b>HisK, no REC</b>  |                          |                                             |     |                         |                      |                                          |
| HacjB3_01570         | <a href="#">ADJ13707</a> | sensory transduction histidine kinase [H... | CDD | <a href="#">UniProt</a> | <a href="#">Pfam</a> | <a href="#">InterPro</a>                 |
| HacjB3_03485         | <a href="#">ADJ14088</a> | HTR-like protein [Halalkalicoccus jeotga... | CDD | <a href="#">UniProt</a> | <a href="#">Pfam</a> | <a href="#">InterPro</a>                 |
| HacjB3_07670         | <a href="#">ADJ14919</a> | histidine kinase [Halalkalicoccus jeotga... | CDD | <a href="#">UniProt</a> | <a href="#">Pfam</a> | <a href="#">InterPro</a>                 |
| HacjB3_07685         | <a href="#">ADJ14922</a> | HTR-like protein [Halalkalicoccus jeotga... | CDD | <a href="#">UniProt</a> | <a href="#">Pfam</a> | <a href="#">InterPro</a>                 |
| HacjB3_09455         | <a href="#">ADJ15274</a> | signal-transducing histidine kinase-like... | CDD | <a href="#">UniProt</a> | <a href="#">Pfam</a> | <a href="#">InterPro</a>                 |
| HacjB3_12375         | <a href="#">ADJ15856</a> | integral membrane sensor signal transduc... | CDD | <a href="#">UniProt</a> | <a href="#">Pfam</a> | <a href="#">InterPro</a>                 |
| <b>REC only</b>      |                          |                                             |     |                         |                      |                                          |
| HacjB3_03480         | <a href="#">ADJ14087</a> | multi-sensor signal transduction histidi... | CDD | <a href="#">UniProt</a> | <a href="#">Pfam</a> | <a href="#">InterPro</a>                 |
| HacjB3_06575         | <a href="#">ADJ14706</a> | response regulator receiver protein [Hal... | CDD | <a href="#">UniProt</a> | <a href="#">Pfam</a> | <a href="#">InterPro</a>                 |
| HacjB3_08175         | <a href="#">ADJ15018</a> | response regulator receiver protein [Hal... | CDD | <a href="#">UniProt</a> | <a href="#">Pfam</a> | <a href="#">InterPro</a>                 |
| HacjB3_12380         | <a href="#">ADJ15857</a> | response regulator receiver protein [Hal... | CDD | <a href="#">UniProt</a> | <a href="#">Pfam</a> | <a href="#">InterPro</a>                 |
| <b>REC-HisK</b>      |                          |                                             |     |                         |                      |                                          |
| HacjB3_01630         | <a href="#">ADJ13719</a> | signal-transducing histidine kinase-like... | CDD | <a href="#">UniProt</a> | <a href="#">Pfam</a> | <a href="#">InterPro</a>                 |
| HacjB3_06595         | <a href="#">ADJ14708</a> | HTR-like protein [Halalkalicoccus jeotga... | CDD | <a href="#">UniProt</a> | <a href="#">Pfam</a> | <a href="#">InterPro</a>                 |
| <b>REC-PAS</b>       |                          |                                             |     |                         |                      |                                          |
| HacjB3_05800         | <a href="#">ADJ14551</a> | HTR-like protein [Halalkalicoccus jeotga... | CDD | <a href="#">UniProt</a> | <a href="#">Pfam</a> | <a href="#">InterPro</a>                 |
| HacjB3_08460         | <a href="#">ADJ15075</a> | multi-sensor signal transduction histidi... | CDD | <a href="#">UniProt</a> | <a href="#">Pfam</a> | <a href="#">InterPro</a>                 |
| <b>REC-HalX</b>      |                          |                                             |     |                         |                      |                                          |
| HacjB3_06600         | <a href="#">ADJ14709</a> | response regulator receiver protein [Hal... | CDD | <a href="#">UniProt</a> | <a href="#">Pfam</a> | <a href="#">InterPro</a>                 |
| HacjB3_10100         | <a href="#">ADJ15403</a> | response regulator receiver protein [Hal... | CDD | <a href="#">UniProt</a> | <a href="#">Pfam</a> | <a href="#">InterPro</a>                 |
| <b>Hx1R-REC-HalX</b> |                          |                                             |     |                         |                      |                                          |
| HacjB3_01620         | <a href="#">ADJ13717</a> | HoxA-like transcriptional regulator [Hal... | CDD | <a href="#">UniProt</a> | <a href="#">Pfam</a> | <a href="#">InterPro</a> (wHTH-REC-HalX) |
| <b>Bat</b>           |                          |                                             |     |                         |                      |                                          |
| HacjB3_00310         | <a href="#">ADJ13455</a> | putative PAS/PAC sensor protein [Halalka... | CDD | <a href="#">UniProt</a> | <a href="#">Pfam</a> | <a href="#">InterPro</a>                 |
| HacjB3_04505         | <a href="#">ADJ14292</a> | putative PAS/PAC sensor protein [Halalka... | CDD | <a href="#">UniProt</a> | <a href="#">Pfam</a> | <a href="#">InterPro</a>                 |
| HacjB3_18828         | <a href="#">ADJ17105</a> | bacterio-opsin activator-like protein (p... | CDD | <a href="#">UniProt</a> | <a href="#">Pfam</a> | <a href="#">InterPro</a>                 |

### Halanaeroarchaeum sulfurireducens

|                     |                          |                                                  |     |                         |                      |                          |
|---------------------|--------------------------|--------------------------------------------------|-----|-------------------------|----------------------|--------------------------|
| <b>HisK, no REC</b> |                          |                                                  |     |                         |                      |                          |
| HLASF_0096          | <a href="#">AKH96610</a> | signal-transducing histidine kinase [Halan...    | CDD | <a href="#">UniProt</a> | <a href="#">Pfam</a> | <a href="#">InterPro</a> |
| HLASF_0153          | <a href="#">AKH96666</a> | PAS/PAC sensor signal transduction histidi...    | CDD | <a href="#">UniProt</a> | <a href="#">Pfam</a> | <a href="#">InterPro</a> |
| HLASF_0190          | <a href="#">AKH96701</a> | histidine kinase [Halanaeroarchaeum sulfur...    | CDD | <a href="#">UniProt</a> | <a href="#">Pfam</a> | <a href="#">InterPro</a> |
| HLASF_0252          | <a href="#">AKH96761</a> | signal-transducing histidine kinase/respon...    | CDD | <a href="#">UniProt</a> | <a href="#">Pfam</a> | <a href="#">InterPro</a> |
| HLASF_0293          | <a href="#">AKH96800</a> | PAS domain s-box [Halanaeroarchaeum sulfur...    | CDD | <a href="#">UniProt</a> | <a href="#">Pfam</a> | <a href="#">InterPro</a> |
| HLASF_0431          | <a href="#">AKH96937</a> | putative signal-transducing histidine kina...    | CDD | <a href="#">UniProt</a> | <a href="#">Pfam</a> | <a href="#">InterPro</a> |
| HLASF_0463          | <a href="#">AKH96968</a> | multi-sensor signal transduction histidine...    | CDD | <a href="#">UniProt</a> | <a href="#">Pfam</a> | <a href="#">InterPro</a> |
| HLASF_0784          | <a href="#">AKH97279</a> | signal-transducing histidine kinase [Halan...    | CDD | <a href="#">UniProt</a> | <a href="#">Pfam</a> | <a href="#">InterPro</a> |
| HLASF_0844          | <a href="#">AKH97337</a> | PAS domain S-box [Halanaeroarchaeum sulfur...    | CDD | <a href="#">UniProt</a> | <a href="#">Pfam</a> | <a href="#">InterPro</a> |
| HLASF_0887          | <a href="#">AKH97379</a> | signal-transducing histidine kinase/respon...    | CDD | <a href="#">UniProt</a> | <a href="#">Pfam</a> | <a href="#">InterPro</a> |
| HLASF_0982          | <a href="#">AKH97472</a> | PAS/PAC sensor signal transduction histidi...    | CDD | <a href="#">UniProt</a> | <a href="#">Pfam</a> | <a href="#">InterPro</a> |
| HLASF_0986          | <a href="#">AKH97476</a> | signal-transducing histidine kinase [Halan...    | CDD | <a href="#">UniProt</a> | <a href="#">Pfam</a> | <a href="#">InterPro</a> |
| HLASF_1036          | <a href="#">AKH97525</a> | multi-sensor signal transduction histidine...    | CDD | <a href="#">UniProt</a> | <a href="#">Pfam</a> | <a href="#">InterPro</a> |
| HLASF_1137          | <a href="#">AKH97625</a> | PAS-PAC-PAC sensing his kinase [Halanaeroa...    | CDD | <a href="#">UniProt</a> | <a href="#">Pfam</a> | <a href="#">InterPro</a> |
| HLASF_1151          | <a href="#">AKH97639</a> | histidine kinase [Halanaeroarchaeum sulfur...    | CDD | <a href="#">UniProt</a> | <a href="#">Pfam</a> | <a href="#">InterPro</a> |
| HLASF_1363          | <a href="#">AKH97849</a> | chemotaxis protein CheA [Halanaeroarchaeum...    | CDD | <a href="#">UniProt</a> | <a href="#">Pfam</a> | <a href="#">InterPro</a> |
| HLASF_1594          | <a href="#">AKH98072</a> | PAS/PAC sensor signal transduction histidi...    | CDD | <a href="#">UniProt</a> | <a href="#">Pfam</a> | <a href="#">InterPro</a> |
| HLASF_1667          | <a href="#">AKH98143</a> | PAS/PAC sensor signal transduction histidi...    | CDD | <a href="#">UniProt</a> | <a href="#">Pfam</a> | <a href="#">InterPro</a> |
| HLASF_1729          | <a href="#">AKH98204</a> | signal-transducing histidine kinase [Halan...    | CDD | <a href="#">UniProt</a> | <a href="#">Pfam</a> | <a href="#">InterPro</a> |
| HLASF_1768          | <a href="#">AKH98240</a> | signal-transducing histidine kinase [Halan...    | CDD | <a href="#">UniProt</a> | <a href="#">Pfam</a> | <a href="#">InterPro</a> |
| HLASF_1769          | <a href="#">AKH98241</a> | PAS/PAC sensor signal transduction histidi...    | CDD | <a href="#">UniProt</a> | <a href="#">Pfam</a> | <a href="#">InterPro</a> |
| HLASF_1890          | <a href="#">AKH98361</a> | signal-transducing histidine kinase [Halan...    | CDD | <a href="#">UniProt</a> | <a href="#">Pfam</a> | <a href="#">InterPro</a> |
| HLASF_1899          | <a href="#">AKH98370</a> | PAS/PAC sensor signal transduction histidi...    | CDD | <a href="#">UniProt</a> | <a href="#">Pfam</a> | <a href="#">InterPro</a> |
| HLASF_1937          | <a href="#">AKH98407</a> | GAF sensor signal transduction histidine k...    | CDD | <a href="#">UniProt</a> | <a href="#">Pfam</a> | <a href="#">InterPro</a> |
| HLASF_2065          | <a href="#">AKH98527</a> | histidine kinase [Halanaeroarchaeum sulfur...    | CDD | <a href="#">UniProt</a> | <a href="#">Pfam</a> | <a href="#">InterPro</a> |
| HLASF_3032          | <a href="#">AKH98658</a> | signal-transducing histidine kinase-like p...    | CDD | <a href="#">UniProt</a> | <a href="#">Pfam</a> | <a href="#">InterPro</a> |
| HLASF_3033          | <a href="#">AKH98659</a> | PAS/PAC sensor signal transduction histidi...    | CDD | <a href="#">UniProt</a> | <a href="#">Pfam</a> | <a href="#">InterPro</a> |
| <b>REC only</b>     |                          |                                                  |     |                         |                      |                          |
| HLASF_1365          | <a href="#">AKH97851</a> | chemotaxis protein CheY [Halanaeroarchaeum...    | CDD | <a href="#">UniProt</a> | <a href="#">Pfam</a> | <a href="#">InterPro</a> |
| <b>REC-HisK</b>     |                          |                                                  |     |                         |                      |                          |
| HLASF_0290          | <a href="#">AKH96797</a> | PAS/PAC sensor signal transduction histidi...    | CDD | <a href="#">UniProt</a> | <a href="#">Pfam</a> | <a href="#">InterPro</a> |
| HLASF_0294          | <a href="#">AKH96801</a> | multi-sensor signal transduction histidine...    | CDD | <a href="#">UniProt</a> | <a href="#">Pfam</a> | <a href="#">InterPro</a> |
| HLASF_3082          | <a href="#">AKH98708</a> | PAS/PAC sensor signal transduction histidi...    | CDD | <a href="#">UniProt</a> | <a href="#">Pfam</a> | <a href="#">InterPro</a> |
| <b>REC-CheB</b>     |                          |                                                  |     |                         |                      |                          |
| HLASF_1364          | <a href="#">AKH97850</a> | chemotaxis-specific methyltransferase CheB [H... | CDD | <a href="#">UniProt</a> | <a href="#">Pfam</a> | <a href="#">InterPro</a> |
| <b>REC-PAS</b>      |                          |                                                  |     |                         |                      |                          |

|                 |                          |                                               |                     |                         |                      |                          |
|-----------------|--------------------------|-----------------------------------------------|---------------------|-------------------------|----------------------|--------------------------|
| HLASF_0292      | <a href="#">AKH96799</a> | PAS/PAC sensor signal transduction histidi... | <a href="#">CDD</a> | <a href="#">UniProt</a> | <a href="#">Pfam</a> | <a href="#">InterPro</a> |
| <b>REC-HalX</b> |                          |                                               |                     |                         |                      |                          |
| HLASF_0332      | <a href="#">AKH96839</a> | response regulator receiver protein [Halan... | <a href="#">CDD</a> | <a href="#">UniProt</a> | <a href="#">Pfam</a> | <a href="#">InterPro</a> |
| HLASF_1337      | <a href="#">AKH97823</a> | response regulator receiver protein [Halan... | <a href="#">CDD</a> | <a href="#">UniProt</a> | <a href="#">Pfam</a> | <a href="#">InterPro</a> |

### Haloarcula hispanica ATCC 33960

#### **HisK, no REC**

|          |                          |                                               |                     |                         |                      |                          |
|----------|--------------------------|-----------------------------------------------|---------------------|-------------------------|----------------------|--------------------------|
| HAH_0071 | <a href="#">AEM55704</a> | HTR-like protein [Haloarcula hispanica ATC... | <a href="#">CDD</a> | <a href="#">UniProt</a> | <a href="#">Pfam</a> | <a href="#">InterPro</a> |
| HAH_0206 | <a href="#">AEM55839</a> | signal-transducing histidine kinase [Haloa... | <a href="#">CDD</a> | <a href="#">UniProt</a> | <a href="#">Pfam</a> | <a href="#">InterPro</a> |
| HAH_0589 | <a href="#">AEM56212</a> | signal-transducing histidine kinase-like p... | <a href="#">CDD</a> | <a href="#">UniProt</a> | <a href="#">Pfam</a> | <a href="#">InterPro</a> |
| HAH_0606 | <a href="#">AEM56229</a> | signal-transducing histidine kinase [Haloa... | <a href="#">CDD</a> | <a href="#">UniProt</a> | <a href="#">Pfam</a> | <a href="#">InterPro</a> |
| HAH_0667 | <a href="#">AEM56290</a> | putative signal-transducing histidine kina... | <a href="#">CDD</a> | <a href="#">UniProt</a> | <a href="#">Pfam</a> | <a href="#">InterPro</a> |
| HAH_0703 | <a href="#">AEM56326</a> | putative signal-transducing histidine kina... | <a href="#">CDD</a> | <a href="#">UniProt</a> | <a href="#">Pfam</a> | <a href="#">InterPro</a> |
| HAH_0841 | <a href="#">AEM56461</a> | HTR-like protein [Haloarcula hispanica ATC... | <a href="#">CDD</a> | <a href="#">UniProt</a> | <a href="#">Pfam</a> | <a href="#">InterPro</a> |
| HAH_0880 | <a href="#">AEM56498</a> | signal-transducing histidine kinase-like p... | <a href="#">CDD</a> | <a href="#">UniProt</a> | <a href="#">Pfam</a> | <a href="#">InterPro</a> |
| HAH_0991 | <a href="#">AEM56609</a> | putative light-sensing histidine kinase [H... | <a href="#">CDD</a> | <a href="#">UniProt</a> | <a href="#">Pfam</a> | <a href="#">InterPro</a> |
| HAH_1163 | <a href="#">AEM56778</a> | membrane associated histidine kinase [Halo... | <a href="#">CDD</a> | <a href="#">UniProt</a> | <a href="#">Pfam</a> | <a href="#">InterPro</a> |
| HAH_1220 | <a href="#">AEM56835</a> | putative GAF-PAC signal-transducing histid... | <a href="#">CDD</a> | <a href="#">UniProt</a> | <a href="#">Pfam</a> | <a href="#">InterPro</a> |
| HAH_1223 | <a href="#">AEM56838</a> | sensory transduction histidine kinase [Hal... | <a href="#">CDD</a> | <a href="#">UniProt</a> | <a href="#">Pfam</a> | <a href="#">InterPro</a> |
| HAH_1592 | <a href="#">AEM57199</a> | putative signal-transducing histidine kina... | <a href="#">CDD</a> | <a href="#">UniProt</a> | <a href="#">Pfam</a> | <a href="#">InterPro</a> |
| HAH_1615 | <a href="#">AEM57222</a> | HTR-like protein [Haloarcula hispanica ATC... | <a href="#">CDD</a> | <a href="#">UniProt</a> | <a href="#">Pfam</a> | <a href="#">InterPro</a> |
| HAH_1618 | <a href="#">AEM57225</a> | HTR-like protein [Haloarcula hispanica ATC... | <a href="#">CDD</a> | <a href="#">UniProt</a> | <a href="#">Pfam</a> | <a href="#">InterPro</a> |
| HAH_1706 | <a href="#">AEM57309</a> | putative signal-transducing histidine kina... | <a href="#">CDD</a> | <a href="#">UniProt</a> | <a href="#">Pfam</a> | <a href="#">InterPro</a> |
| HAH_1721 | <a href="#">AEM57323</a> | HTR-like protein [Haloarcula hispanica ATC... | <a href="#">CDD</a> | <a href="#">UniProt</a> | <a href="#">Pfam</a> | <a href="#">InterPro</a> |
| HAH_1966 | <a href="#">AEM57563</a> | HTR-like protein [Haloarcula hispanica ATC... | <a href="#">CDD</a> | <a href="#">UniProt</a> | <a href="#">Pfam</a> | <a href="#">InterPro</a> |
| HAH_2073 | <a href="#">AEM57667</a> | PAS-PAC-PAC sensing histidine kinase [Halo... | <a href="#">CDD</a> | <a href="#">UniProt</a> | <a href="#">Pfam</a> | <a href="#">InterPro</a> |
| HAH_2228 | <a href="#">AEM57817</a> | membrane bound histidine kinase A [Haloarc... | <a href="#">CDD</a> | <a href="#">UniProt</a> | <a href="#">Pfam</a> | <a href="#">InterPro</a> |
| HAH_2681 | <a href="#">AEM58266</a> | chemotaxis protein CheA [Haloarcula hispan... | <a href="#">CDD</a> | <a href="#">UniProt</a> | <a href="#">Pfam</a> | <a href="#">InterPro</a> |
| HAH_2781 | <a href="#">AEM58361</a> | histidine kinase [Haloarcula hispanica ATC... | <a href="#">CDD</a> | <a href="#">UniProt</a> | <a href="#">Pfam</a> | <a href="#">InterPro</a> |
| HAH_2893 | <a href="#">AEM58470</a> | adaptive-response sensory-kinase [Haloarcu... | <a href="#">CDD</a> | <a href="#">UniProt</a> | <a href="#">Pfam</a> | <a href="#">InterPro</a> |
| HAH_2907 | <a href="#">AEM58484</a> | protein kinase-like protein [Haloarcula hi... | <a href="#">CDD</a> | <a href="#">UniProt</a> | <a href="#">Pfam</a> | <a href="#">InterPro</a> |
| HAH_3035 | <a href="#">AEM58609</a> | adaptive-response sensory-kinase [Haloarcu... | <a href="#">CDD</a> | <a href="#">UniProt</a> | <a href="#">Pfam</a> | <a href="#">InterPro</a> |
| HAH_5014 | <a href="#">AEM59148</a> | PAS domain S-box (plasmid) [Haloarcula his... | <a href="#">CDD</a> | <a href="#">UniProt</a> | <a href="#">Pfam</a> | <a href="#">InterPro</a> |

#### **REC only**

|          |                          |                                               |                     |                         |                      |                          |
|----------|--------------------------|-----------------------------------------------|---------------------|-------------------------|----------------------|--------------------------|
| HAH_1222 | <a href="#">AEM56837</a> | response regulator receiver [Haloarcula hi... | <a href="#">CDD</a> | <a href="#">UniProt</a> | <a href="#">Pfam</a> | <a href="#">InterPro</a> |
| HAH_2067 | <a href="#">AEM57661</a> | HTR-like protein [Haloarcula hispanica ATC... | <a href="#">CDD</a> | <a href="#">UniProt</a> | <a href="#">Pfam</a> | <a href="#">InterPro</a> |
| HAH_2670 | <a href="#">AEM58255</a> | chemotaxis protein CheY [Haloarcula hispan... | <a href="#">CDD</a> | <a href="#">UniProt</a> | <a href="#">Pfam</a> | <a href="#">InterPro</a> |

#### **REC-HisK**

|          |                          |                                               |                     |                         |                      |                          |
|----------|--------------------------|-----------------------------------------------|---------------------|-------------------------|----------------------|--------------------------|
| HAH_0600 | <a href="#">AEM56223</a> | HTR-like protein [Haloarcula hispanica ATC... | <a href="#">CDD</a> | <a href="#">UniProt</a> | <a href="#">Pfam</a> | <a href="#">InterPro</a> |
| HAH_0612 | <a href="#">AEM56235</a> | HTR-like protein [Haloarcula hispanica ATC... | <a href="#">CDD</a> | <a href="#">UniProt</a> | <a href="#">Pfam</a> | <a href="#">InterPro</a> |
| HAH_0833 | <a href="#">AEM56453</a> | HTR-like protein [Haloarcula hispanica ATC... | <a href="#">CDD</a> | <a href="#">UniProt</a> | <a href="#">Pfam</a> | <a href="#">InterPro</a> |
| HAH_1041 | <a href="#">AEM56659</a> | signal transducing histidine kinase [Haloa... | <a href="#">CDD</a> | <a href="#">UniProt</a> | <a href="#">Pfam</a> | <a href="#">InterPro</a> |
| HAH_1151 | <a href="#">AEM56766</a> | HTR-like protein [Haloarcula hispanica ATC... | <a href="#">CDD</a> | <a href="#">UniProt</a> | <a href="#">Pfam</a> | <a href="#">InterPro</a> |
| HAH_1165 | <a href="#">AEM56780</a> | signal transducing histidine kinase [Haloa... | <a href="#">CDD</a> | <a href="#">UniProt</a> | <a href="#">Pfam</a> | <a href="#">InterPro</a> |
| HAH_1221 | <a href="#">AEM56836</a> | signal-transducing histidine kinase [Haloa... | <a href="#">CDD</a> | <a href="#">UniProt</a> | <a href="#">Pfam</a> | <a href="#">InterPro</a> |
| HAH_1275 | <a href="#">AEM56890</a> | HTR-like protein [Haloarcula hispanica ATC... | <a href="#">CDD</a> | <a href="#">UniProt</a> | <a href="#">Pfam</a> | <a href="#">InterPro</a> |
| HAH_1439 | <a href="#">AEM57049</a> | HTR-like protein [Haloarcula hispanica ATC... | <a href="#">CDD</a> | <a href="#">UniProt</a> | <a href="#">Pfam</a> | <a href="#">InterPro</a> |
| HAH_1487 | <a href="#">AEM57096</a> | HTR-like protein [Haloarcula hispanica ATC... | <a href="#">CDD</a> | <a href="#">UniProt</a> | <a href="#">Pfam</a> | <a href="#">InterPro</a> |
| HAH_2068 | <a href="#">AEM57662</a> | putative light- and oxygen-sensing transcr... | <a href="#">CDD</a> | <a href="#">UniProt</a> | <a href="#">Pfam</a> | <a href="#">InterPro</a> |
| HAH_2167 | <a href="#">AEM57757</a> | HTR-like protein [Haloarcula hispanica ATC... | <a href="#">CDD</a> | <a href="#">UniProt</a> | <a href="#">Pfam</a> | <a href="#">InterPro</a> |
| HAH_2332 | <a href="#">AEM57920</a> | HTR-like protein [Haloarcula hispanica ATC... | <a href="#">CDD</a> | <a href="#">UniProt</a> | <a href="#">Pfam</a> | <a href="#">InterPro</a> |
| HAH_2810 | <a href="#">AEM58390</a> | HTR-like protein [Haloarcula hispanica ATC... | <a href="#">CDD</a> | <a href="#">UniProt</a> | <a href="#">Pfam</a> | <a href="#">InterPro</a> |
| HAH_2849 | <a href="#">AEM58428</a> | putative light and redox sensing histidine... | <a href="#">CDD</a> | <a href="#">UniProt</a> | <a href="#">Pfam</a> | <a href="#">InterPro</a> |
| HAH_2964 | <a href="#">AEM58538</a> | adaptive-response sensory-kinase [Haloarcu... | <a href="#">CDD</a> | <a href="#">UniProt</a> | <a href="#">Pfam</a> | <a href="#">InterPro</a> |
| HAH_5035 | <a href="#">AEM59169</a> | light and oxygen sensing histidine kinase ... | <a href="#">CDD</a> | <a href="#">UniProt</a> | <a href="#">Pfam</a> | <a href="#">InterPro</a> |
| HAH_5036 | <a href="#">AEM59170</a> | HTR-like protein (plasmid) [Haloarcula his... | <a href="#">CDD</a> | <a href="#">UniProt</a> | <a href="#">Pfam</a> | <a href="#">InterPro</a> |

#### **REC-CheB**

|          |                          |                                               |                     |                         |                      |                          |
|----------|--------------------------|-----------------------------------------------|---------------------|-------------------------|----------------------|--------------------------|
| HAH_2680 | <a href="#">AEM58265</a> | chemotaxis response regulator protein-glut... | <a href="#">CDD</a> | <a href="#">UniProt</a> | <a href="#">Pfam</a> | <a href="#">InterPro</a> |
|----------|--------------------------|-----------------------------------------------|---------------------|-------------------------|----------------------|--------------------------|

#### **REC-PAS\GAF**

|          |                          |                                               |                     |                         |                      |                          |
|----------|--------------------------|-----------------------------------------------|---------------------|-------------------------|----------------------|--------------------------|
| HAH_0305 | <a href="#">AEM55931</a> | HTR-like protein [Haloarcula hispanica ATC... | <a href="#">CDD</a> | <a href="#">UniProt</a> | <a href="#">Pfam</a> | <a href="#">InterPro</a> |
| HAH_1327 | <a href="#">AEM56941</a> | HTR-like protein [Haloarcula hispanica ATC... | <a href="#">CDD</a> | <a href="#">UniProt</a> | <a href="#">Pfam</a> | <a href="#">InterPro</a> |
| HAH_1746 | <a href="#">AEM57348</a> | conserved hypothetical protein [Haloarcula... | <a href="#">CDD</a> | <a href="#">UniProt</a> | <a href="#">Pfam</a> | <a href="#">InterPro</a> |
| HAH_2599 | <a href="#">AEM58185</a> | HTR-like protein [Haloarcula hispanica ATC... | <a href="#">CDD</a> | <a href="#">UniProt</a> | <a href="#">Pfam</a> | <a href="#">InterPro</a> |
| HAH_3048 | <a href="#">AEM58622</a> | HTR-like protein [Haloarcula hispanica ATC... | <a href="#">CDD</a> | <a href="#">UniProt</a> | <a href="#">Pfam</a> | <a href="#">InterPro</a> |
| HAH_1089 | <a href="#">AEM56707</a> | HTR-like protein [Haloarcula hispanica ATC... | <a href="#">CDD</a> | <a href="#">UniProt</a> | <a href="#">Pfam</a> | <a href="#">InterPro</a> |

#### **REC-HalX**

|          |                          |                                               |                     |                         |                      |                          |
|----------|--------------------------|-----------------------------------------------|---------------------|-------------------------|----------------------|--------------------------|
| HAH_0545 | <a href="#">AEM56169</a> | HoxA-like transcriptional regulator [Haloa... | <a href="#">CDD</a> | <a href="#">UniProt</a> | <a href="#">Pfam</a> | <a href="#">InterPro</a> |
| HAH_0617 | <a href="#">AEM56240</a> | signal receiver domain-containing protein ... | <a href="#">CDD</a> | <a href="#">UniProt</a> | <a href="#">Pfam</a> | <a href="#">InterPro</a> |
| HAH_1093 | <a href="#">AEM56711</a> | HoxA-like transcriptional regulator [Haloa... | <a href="#">CDD</a> | <a href="#">UniProt</a> | <a href="#">Pfam</a> | <a href="#">InterPro</a> |
| HAH_1107 | <a href="#">AEM56724</a> | HoxA-like transcriptional regulator [Haloa... | <a href="#">CDD</a> | <a href="#">UniProt</a> | <a href="#">Pfam</a> | <a href="#">InterPro</a> |
| HAH_1725 | <a href="#">AEM57327</a> | HoxA-like transcriptional regulator / resp... | <a href="#">CDD</a> | <a href="#">UniProt</a> | <a href="#">Pfam</a> | <a href="#">InterPro</a> |
| HAH_2172 | <a href="#">AEM57761</a> | HoxA-like transcriptional regulator [Haloa... | <a href="#">CDD</a> | <a href="#">UniProt</a> | <a href="#">Pfam</a> | <a href="#">InterPro</a> |

#### **Bat**

|          |                          |                                               |                     |                         |                      |                          |
|----------|--------------------------|-----------------------------------------------|---------------------|-------------------------|----------------------|--------------------------|
| HAH_5032 | <a href="#">AEM59166</a> | bacterio-opsin activator-like protein (pla... | <a href="#">CDD</a> | <a href="#">UniProt</a> | <a href="#">Pfam</a> | <a href="#">InterPro</a> |
| HAH_5327 | <a href="#">AEM59460</a> | bacterio-opsin activator-like protein (pla... | <a href="#">CDD</a> | <a href="#">UniProt</a> | <a href="#">Pfam</a> | <a href="#">InterPro</a> |

### Haloarcula marismortui ATCC 43049

**HisK, no REC**

|           |                          |                                               |                     |                         |                      |                          |
|-----------|--------------------------|-----------------------------------------------|---------------------|-------------------------|----------------------|--------------------------|
| rrnAC0086 | <a href="#">AAV45164</a> | HTR-like protein [Haloarcula marismortui A... | <a href="#">CDD</a> | <a href="#">UniProt</a> | <a href="#">Pfam</a> | <a href="#">InterPro</a> |
| rrnAC0247 | <a href="#">AAV45304</a> | putative light-sensing histidine kinase [H... | <a href="#">CDD</a> | <a href="#">UniProt</a> | <a href="#">Pfam</a> | <a href="#">InterPro</a> |
| rrnAC0413 | <a href="#">AAV45448</a> | gaf-pac signal-transducing histidine kinas... | <a href="#">CDD</a> | <a href="#">UniProt</a> | <a href="#">Pfam</a> | <a href="#">InterPro</a> |
| rrnAC0130 | <a href="#">AAV45202</a> | signal-transducing histidine kinase-like [... | <a href="#">CDD</a> | <a href="#">UniProt</a> | <a href="#">Pfam</a> | <a href="#">InterPro</a> |
| rrnAC0301 | <a href="#">AAV45356</a> | signal transducing his kinase [Haloarcula ... | <a href="#">CDD</a> | <a href="#">UniProt</a> | <a href="#">Pfam</a> | <a href="#">InterPro</a> |
| rrnAC0410 | <a href="#">AAV45445</a> | sensory transduction histidine kinase [Hal... | <a href="#">CDD</a> | <a href="#">UniProt</a> | <a href="#">Pfam</a> | <a href="#">InterPro</a> |
| rrnAC0477 | <a href="#">AAV45502</a> | membrane associated histidine kinase [Halo... | <a href="#">CDD</a> | <a href="#">UniProt</a> | <a href="#">Pfam</a> | <a href="#">InterPro</a> |
| rrnAC0789 | <a href="#">AAV45776</a> | putative PAS/PAC sensing his kinase [Haloa... | <a href="#">CDD</a> | <a href="#">UniProt</a> | <a href="#">Pfam</a> | <a href="#">InterPro</a> |
| rrnAC0964 | <a href="#">AAV45935</a> | signal-transducing histidine kinase-like [... | <a href="#">CDD</a> | <a href="#">UniProt</a> | <a href="#">Pfam</a> | <a href="#">InterPro</a> |
| rrnAC0988 | <a href="#">AAV45956</a> | HTR-like protein [Haloarcula marismortui A... | <a href="#">CDD</a> | <a href="#">UniProt</a> | <a href="#">Pfam</a> | <a href="#">InterPro</a> |
| rrnAC0991 | <a href="#">AAV45959</a> | HTR-like protein [Haloarcula marismortui A... | <a href="#">CDD</a> | <a href="#">UniProt</a> | <a href="#">Pfam</a> | <a href="#">InterPro</a> |
| rrnAC1096 | <a href="#">AAV46056</a> | signal-transducing histidine kinase-like [... | <a href="#">CDD</a> | <a href="#">UniProt</a> | <a href="#">Pfam</a> | <a href="#">InterPro</a> |
| rrnAC1114 | <a href="#">AAV46071</a> | HTR-like protein [Haloarcula marismortui A... | <a href="#">CDD</a> | <a href="#">UniProt</a> | <a href="#">Pfam</a> | <a href="#">InterPro</a> |
| rrnAC1346 | <a href="#">AAV46277</a> | signal-transducing histidine kinase-like [... | <a href="#">CDD</a> | <a href="#">UniProt</a> | <a href="#">Pfam</a> | <a href="#">InterPro</a> |
| rrnAC1391 | <a href="#">AAV46320</a> | HTR-like protein [Haloarcula marismortui A... | <a href="#">CDD</a> | <a href="#">UniProt</a> | <a href="#">Pfam</a> | <a href="#">InterPro</a> |
| rrnAC1486 | <a href="#">AAV46411</a> | signal-transducing histidine kinase-like [... | <a href="#">CDD</a> | <a href="#">UniProt</a> | <a href="#">Pfam</a> | <a href="#">InterPro</a> |
| rrnAC1501 | <a href="#">AAV46423</a> | pas-pac-pac sensing his kinase [Haloarcula... | <a href="#">CDD</a> | <a href="#">UniProt</a> | <a href="#">Pfam</a> | <a href="#">InterPro</a> |
| rrnAC1693 | <a href="#">AAV46601</a> | membrane bound his kinase A [Haloarcula ma... | <a href="#">CDD</a> | <a href="#">UniProt</a> | <a href="#">Pfam</a> | <a href="#">InterPro</a> |
| rrnAC2205 | <a href="#">AAV47041</a> | chemotaxis protein CheA [Haloarcula marism... | <a href="#">CDD</a> | <a href="#">UniProt</a> | <a href="#">Pfam</a> | <a href="#">InterPro</a> |
| rrnAC2219 | <a href="#">AAV47052</a> | PhoR protein-like [Haloarcula marismortui ... | <a href="#">CDD</a> | <a href="#">UniProt</a> | <a href="#">Pfam</a> | <a href="#">InterPro</a> |
| rrnAC2337 | <a href="#">AAV47159</a> | histidine kinase [Haloarcula marismortui A... | <a href="#">CDD</a> | <a href="#">UniProt</a> | <a href="#">Pfam</a> | <a href="#">InterPro</a> |
| rrnAC2461 | <a href="#">AAV47268</a> | adaptive-response sensory-kinase [Haloarcu... | <a href="#">CDD</a> | <a href="#">UniProt</a> | <a href="#">Pfam</a> | <a href="#">InterPro</a> |
| rrnAC2477 | <a href="#">AAV47283</a> | protein kinase-like [Haloarcula marismortu... | <a href="#">CDD</a> | <a href="#">UniProt</a> | <a href="#">Pfam</a> | <a href="#">InterPro</a> |
| rrnAC2616 | <a href="#">AAV47403</a> | adaptive-response sensory-kinase [Haloarcu... | <a href="#">CDD</a> | <a href="#">UniProt</a> | <a href="#">Pfam</a> | <a href="#">InterPro</a> |
| rrnAC2694 | <a href="#">AAV47465</a> | unknown [Haloarcula marismortui ATCC 43049... | <a href="#">CDD</a> | <a href="#">UniProt</a> | <a href="#">Pfam</a> | <a href="#">InterPro</a> |
| rrnAC2789 | <a href="#">AAV47546</a> | HTR-like protein [Haloarcula marismortui A... | <a href="#">CDD</a> | <a href="#">UniProt</a> | <a href="#">Pfam</a> | <a href="#">InterPro</a> |
| rrnAC2945 | <a href="#">AAV47680</a> | signal-transducing histidine kinase [Haloa... | <a href="#">CDD</a> | <a href="#">UniProt</a> | <a href="#">Pfam</a> | <a href="#">InterPro</a> |
| rrnAC2997 | <a href="#">AAV47726</a> | membrane bound his kinase A [Haloarcula ma... | <a href="#">CDD</a> | <a href="#">UniProt</a> | <a href="#">Pfam</a> | <a href="#">InterPro</a> |
| rrnAC3347 | <a href="#">AAV48037</a> | signal-transducing histidine kinase-like [... | <a href="#">CDD</a> | <a href="#">UniProt</a> | <a href="#">Pfam</a> | <a href="#">InterPro</a> |
| rrnAC3349 | <a href="#">AAV48038</a> | signal-transducing histidine kinase-like [... | <a href="#">CDD</a> | <a href="#">UniProt</a> | <a href="#">Pfam</a> | <a href="#">InterPro</a> |
| rrnAC3370 | <a href="#">AAV48057</a> | signal transducing histidine kinase [Haloa... | <a href="#">CDD</a> | <a href="#">UniProt</a> | <a href="#">Pfam</a> | <a href="#">InterPro</a> |
| rrnAC3482 | <a href="#">AAV48156</a> | putative signal-transducing histidine kina... | <a href="#">CDD</a> | <a href="#">UniProt</a> | <a href="#">Pfam</a> | <a href="#">InterPro</a> |
| rrnB0133  | <a href="#">AAV48329</a> | putative redox sensing protein [Haloarcula... | <a href="#">CDD</a> | <a href="#">UniProt</a> | <a href="#">Pfam</a> | <a href="#">InterPro</a> |
| rrnB0156  | <a href="#">AAV48345</a> | putative light and redox sensing histidine... | <a href="#">CDD</a> | <a href="#">UniProt</a> | <a href="#">Pfam</a> | <a href="#">InterPro</a> |
| rrnB0180  | <a href="#">AAV48366</a> | putative 22-domain light- and oxygen-sensi... | <a href="#">CDD</a> | <a href="#">UniProt</a> | <a href="#">Pfam</a> | <a href="#">InterPro</a> |
| rrnB0295  | <a href="#">AAV48462</a> | gaf only light sensing his kinase [Haloarc... | <a href="#">CDD</a> | <a href="#">UniProt</a> | <a href="#">Pfam</a> | <a href="#">InterPro</a> |
| rrnB0299  | <a href="#">AAV48465</a> | nineteen domain light and oxygen sensing h... | <a href="#">CDD</a> | <a href="#">UniProt</a> | <a href="#">Pfam</a> | <a href="#">InterPro</a> |
| *rrnB0178 | <a href="#">AAV48365</a> | unknown [Haloarcula marismortui ATCC 43049... | <a href="#">CDD</a> | <a href="#">UniProt</a> | <a href="#">Pfam</a> | <a href="#">InterPro</a> |

**REC only**

|           |                          |                                               |                     |                         |                      |                          |
|-----------|--------------------------|-----------------------------------------------|---------------------|-------------------------|----------------------|--------------------------|
| rrnAC0411 | <a href="#">AAV45446</a> | response regulator receiver [Haloarcula ma... | <a href="#">CDD</a> | <a href="#">UniProt</a> | <a href="#">Pfam</a> | <a href="#">InterPro</a> |
| rrnAC1494 | <a href="#">AAV46417</a> | HTR-like protein [Haloarcula marismortui A... | <a href="#">CDD</a> | <a href="#">UniProt</a> | <a href="#">Pfam</a> | <a href="#">InterPro</a> |
| rrnAC2168 | <a href="#">AAV47011</a> | unknown [Haloarcula marismortui ATCC 43049... | <a href="#">CDD</a> | <a href="#">UniProt</a> | <a href="#">Pfam</a> | <a href="#">InterPro</a> |
| rrnAC2194 | <a href="#">AAV47032</a> | chemotaxis protein CheY [Haloarcula marism... | <a href="#">CDD</a> | <a href="#">UniProt</a> | <a href="#">Pfam</a> | <a href="#">InterPro</a> |
| rrnB0297  | <a href="#">AAV48464</a> | two-component response regulator [Haloarcu... | <a href="#">CDD</a> | <a href="#">UniProt</a> | <a href="#">Pfam</a> | <a href="#">InterPro</a> |
| rrnB0302  | <a href="#">AAV48467</a> | response regulator [Haloarcula marismortui... | <a href="#">CDD</a> | <a href="#">UniProt</a> | <a href="#">Pfam</a> | <a href="#">InterPro</a> |
| pNG4019   | <a href="#">AAV44395</a> | HTR-type protein [Haloarcula marismortui A... | <a href="#">CDD</a> | <a href="#">UniProt</a> | <a href="#">Pfam</a> | <a href="#">InterPro</a> |

**REC-HisK**

|           |                          |                                               |                     |                         |                      |                          |
|-----------|--------------------------|-----------------------------------------------|---------------------|-------------------------|----------------------|--------------------------|
| pNG7155   | <a href="#">AAV44863</a> | HTR-type protein [Haloarcula marismortui A... | <a href="#">CDD</a> | <a href="#">UniProt</a> | <a href="#">Pfam</a> | <a href="#">InterPro</a> |
| pNG7156   | <a href="#">AAV44864</a> | 11-domain light and oxygen sensing his kin... | <a href="#">CDD</a> | <a href="#">UniProt</a> | <a href="#">Pfam</a> | <a href="#">InterPro</a> |
| rrnAC0075 | <a href="#">AAV45155</a> | HTR-type protein [Haloarcula marismortui A... | <a href="#">CDD</a> | <a href="#">UniProt</a> | <a href="#">Pfam</a> | <a href="#">InterPro</a> |
| rrnAC0412 | <a href="#">AAV45447</a> | signal-transducing histidine kinase [Haloa... | <a href="#">CDD</a> | <a href="#">UniProt</a> | <a href="#">Pfam</a> | <a href="#">InterPro</a> |
| rrnAC0475 | <a href="#">AAV45500</a> | signal transducing his kinase [Haloarcula ... | <a href="#">CDD</a> | <a href="#">UniProt</a> | <a href="#">Pfam</a> | <a href="#">InterPro</a> |
| rrnAC0487 | <a href="#">AAV45512</a> | HTR-type protein [Haloarcula marismortui A... | <a href="#">CDD</a> | <a href="#">UniProt</a> | <a href="#">Pfam</a> | <a href="#">InterPro</a> |
| rrnAC0574 | <a href="#">AAV45588</a> | HTR-type protein [Haloarcula marismortui A... | <a href="#">CDD</a> | <a href="#">UniProt</a> | <a href="#">Pfam</a> | <a href="#">InterPro</a> |
| rrnAC0794 | <a href="#">AAV45781</a> | HTR-like protein [Haloarcula marismortui A... | <a href="#">CDD</a> | <a href="#">UniProt</a> | <a href="#">Pfam</a> | <a href="#">InterPro</a> |
| rrnAC0848 | <a href="#">AAV45829</a> | HTR-type protein [Haloarcula marismortui A... | <a href="#">CDD</a> | <a href="#">UniProt</a> | <a href="#">Pfam</a> | <a href="#">InterPro</a> |
| rrnAC1495 | <a href="#">AAV46418</a> | putative light- and oxygen-sensing transcr... | <a href="#">CDD</a> | <a href="#">UniProt</a> | <a href="#">Pfam</a> | <a href="#">InterPro</a> |
| rrnAC1626 | <a href="#">AAV46539</a> | HTR-type protein [Haloarcula marismortui A... | <a href="#">CDD</a> | <a href="#">UniProt</a> | <a href="#">Pfam</a> | <a href="#">InterPro</a> |
| rrnAC1806 | <a href="#">AAV46695</a> | HTR-type protein [Haloarcula marismortui A... | <a href="#">CDD</a> | <a href="#">UniProt</a> | <a href="#">Pfam</a> | <a href="#">InterPro</a> |
| rrnAC2044 | <a href="#">AAV46901</a> | HTR-type protein [Haloarcula marismortui A... | <a href="#">CDD</a> | <a href="#">UniProt</a> | <a href="#">Pfam</a> | <a href="#">InterPro</a> |
| rrnAC2372 | <a href="#">AAV47188</a> | HTR-type protein [Haloarcula marismortui A... | <a href="#">CDD</a> | <a href="#">UniProt</a> | <a href="#">Pfam</a> | <a href="#">InterPro</a> |
| rrnAC2416 | <a href="#">AAV47229</a> | putative light and redox sensing histidine... | <a href="#">CDD</a> | <a href="#">UniProt</a> | <a href="#">Pfam</a> | <a href="#">InterPro</a> |
| rrnAC2533 | <a href="#">AAV47335</a> | adaptive-response sensory-kinase [Haloarcu... | <a href="#">CDD</a> | <a href="#">UniProt</a> | <a href="#">Pfam</a> | <a href="#">InterPro</a> |
| rrnAC2692 | <a href="#">AAV47464</a> | oxygen and light sensing his kinase [Haloa... | <a href="#">CDD</a> | <a href="#">UniProt</a> | <a href="#">Pfam</a> | <a href="#">InterPro</a> |
| rrnAC3050 | <a href="#">AAV47770</a> | HTR-type protein [Haloarcula marismortui A... | <a href="#">CDD</a> | <a href="#">UniProt</a> | <a href="#">Pfam</a> | <a href="#">InterPro</a> |
| rrnAC3361 | <a href="#">AAV48050</a> | HTR-type protein [Haloarcula marismortui A... | <a href="#">CDD</a> | <a href="#">UniProt</a> | <a href="#">Pfam</a> | <a href="#">InterPro</a> |
| rrnAC3379 | <a href="#">AAV48063</a> | HTR-type protein [Haloarcula marismortui A... | <a href="#">CDD</a> | <a href="#">UniProt</a> | <a href="#">Pfam</a> | <a href="#">InterPro</a> |
| rrnB0296  | <a href="#">AAV48463</a> | signal-transducing histidine kinase-like [... | <a href="#">CDD</a> | <a href="#">UniProt</a> | <a href="#">Pfam</a> | <a href="#">InterPro</a> |

**REC-CheB**

|           |                          |                                               |                     |                         |                      |                          |
|-----------|--------------------------|-----------------------------------------------|---------------------|-------------------------|----------------------|--------------------------|
| rrnAC2204 | <a href="#">AAV47040</a> | protein-glutamate methylesterase [Haloarcu... | <a href="#">CDD</a> | <a href="#">UniProt</a> | <a href="#">Pfam</a> | <a href="#">InterPro</a> |
|-----------|--------------------------|-----------------------------------------------|---------------------|-------------------------|----------------------|--------------------------|

**REC-PAS/GAF**

|           |                          |                                               |                     |                         |                      |                          |
|-----------|--------------------------|-----------------------------------------------|---------------------|-------------------------|----------------------|--------------------------|
| rrnAC0339 | <a href="#">AAV45387</a> | HTR-type protein [Haloarcula marismortui A... | <a href="#">CDD</a> | <a href="#">UniProt</a> | <a href="#">Pfam</a> | <a href="#">InterPro</a> |
| rrnAC0356 | <a href="#">AAV45402</a> | HTR-type protein [Haloarcula marismortui A... | <a href="#">CDD</a> | <a href="#">UniProt</a> | <a href="#">Pfam</a> | <a href="#">InterPro</a> |
| rrnAC0674 | <a href="#">AAV45676</a> | HTR-type protein [Haloarcula marismortui A... | <a href="#">CDD</a> | <a href="#">UniProt</a> | <a href="#">Pfam</a> | <a href="#">InterPro</a> |
| rrnAC1142 | <a href="#">AAV46094</a> | unknown [Haloarcula marismortui ATCC 43049... | <a href="#">CDD</a> | <a href="#">UniProt</a> | <a href="#">Pfam</a> | <a href="#">InterPro</a> |
| rrnAC2109 | <a href="#">AAV46960</a> | HTR-type protein [Haloarcula marismortui A... | <a href="#">CDD</a> | <a href="#">UniProt</a> | <a href="#">Pfam</a> | <a href="#">InterPro</a> |
| rrnAC2211 | <a href="#">AAV47045</a> | HTR-type protein [Haloarcula marismortui A... | <a href="#">CDD</a> | <a href="#">UniProt</a> | <a href="#">Pfam</a> | <a href="#">InterPro</a> |
| rrnAC3271 | <a href="#">AAV47967</a> | small putative GAF containing sensor [Halo... | <a href="#">CDD</a> | <a href="#">UniProt</a> | <a href="#">Pfam</a> | <a href="#">InterPro</a> |



**REC-HalX**

|           |                          |                                               |                     |                         |                      |                          |
|-----------|--------------------------|-----------------------------------------------|---------------------|-------------------------|----------------------|--------------------------|
| rrnAC0361 | <a href="#">AAV45406</a> | HoxA-type transcriptional regulator [Haloa... | <a href="#">CDD</a> | <a href="#">UniProt</a> | <a href="#">Pfam</a> | <a href="#">InterPro</a> |
| rrnAC0536 | <a href="#">AAV45554</a> | HoxA-type transcriptional regulator [Haloa... | <a href="#">CDD</a> | <a href="#">UniProt</a> | <a href="#">Pfam</a> | <a href="#">InterPro</a> |
| rrnAC1118 | <a href="#">AAV46075</a> | HoxA-type transcriptional regulator [Haloa... | <a href="#">CDD</a> | <a href="#">UniProt</a> | <a href="#">Pfam</a> | <a href="#">InterPro</a> |
| rrnAC1630 | <a href="#">AAV46544</a> | HoxA-type transcriptional regulator [Haloa... | <a href="#">CDD</a> | <a href="#">UniProt</a> | <a href="#">Pfam</a> | <a href="#">InterPro</a> |
| rrnAC3308 | <a href="#">AAV47999</a> | HoxA-type transcriptional regulator [Haloa... | <a href="#">CDD</a> | <a href="#">UniProt</a> | <a href="#">Pfam</a> | <a href="#">InterPro</a> |
| rrnAC3385 | <a href="#">AAV48068</a> | signal receiver domain protein [Haloarcula... | <a href="#">CDD</a> | <a href="#">UniProt</a> | <a href="#">Pfam</a> | <a href="#">InterPro</a> |

**Bat**

|         |                          |                                               |                     |                         |                      |                          |
|---------|--------------------------|-----------------------------------------------|---------------------|-------------------------|----------------------|--------------------------|
| pNG7159 | <a href="#">AAV44867</a> | bacterio-opsin activator-like protein (pla... | <a href="#">CDD</a> | <a href="#">UniProt</a> | <a href="#">Pfam</a> | <a href="#">InterPro</a> |
| pNG7223 | <a href="#">AAV44926</a> | bacterio-opsin activator-like protein (pla... | <a href="#">CDD</a> | <a href="#">UniProt</a> | <a href="#">Pfam</a> | <a href="#">InterPro</a> |

**HxlR-REC-HalX**

|          |                          |                                               |                     |                         |                      |                          |                |
|----------|--------------------------|-----------------------------------------------|---------------------|-------------------------|----------------------|--------------------------|----------------|
| rrnB0301 | <a href="#">AAV48466</a> | HoxA-type transcriptional regulator [Haloa... | <a href="#">CDD</a> | <a href="#">UniProt</a> | <a href="#">Pfam</a> | <a href="#">InterPro</a> | (WTH-REC-HalX) |
|----------|--------------------------|-----------------------------------------------|---------------------|-------------------------|----------------------|--------------------------|----------------|

**Haloarcula sp. CBA1115****HisK, no REC**

|            |                          |                                               |                     |                         |                      |                          |
|------------|--------------------------|-----------------------------------------------|---------------------|-------------------------|----------------------|--------------------------|
| SG26_02335 | <a href="#">AJF24630</a> | chemotaxis protein CheY [Haloarcula sp. CB... | <a href="#">CDD</a> | <a href="#">UniProt</a> | <a href="#">Pfam</a> | <a href="#">InterPro</a> |
| SG26_02855 | <a href="#">AJF24726</a> | peptidylprolyl isomerase [Haloarcula sp. C... | <a href="#">CDD</a> | <a href="#">UniProt</a> | <a href="#">Pfam</a> | <a href="#">InterPro</a> |
| SG26_03720 | <a href="#">AJF24880</a> | histidine kinase [Haloarcula sp. CBA1115] ... | <a href="#">CDD</a> | <a href="#">UniProt</a> | <a href="#">Pfam</a> | <a href="#">InterPro</a> |
| SG26_05915 | <a href="#">AJF25298</a> | chemotaxis protein CheA [Haloarcula sp. CB... | <a href="#">CDD</a> | <a href="#">UniProt</a> | <a href="#">Pfam</a> | <a href="#">InterPro</a> |
| SG26_06410 | <a href="#">AJF25385</a> | histidine kinase [Haloarcula sp. CBA1115] ... | <a href="#">CDD</a> | <a href="#">UniProt</a> | <a href="#">Pfam</a> | <a href="#">InterPro</a> |
| SG26_06835 | <a href="#">AJF25462</a> | histidine kinase [Haloarcula sp. CBA1115] ... | <a href="#">CDD</a> | <a href="#">UniProt</a> | <a href="#">Pfam</a> | <a href="#">InterPro</a> |
| SG26_07545 | <a href="#">AJF25594</a> | histidine kinase [Haloarcula sp. CBA1115] ... | <a href="#">CDD</a> | <a href="#">UniProt</a> | <a href="#">Pfam</a> | <a href="#">InterPro</a> |
| SG26_08310 | <a href="#">AJF25729</a> | chemotaxis protein CheY [Haloarcula sp. CB... | <a href="#">CDD</a> | <a href="#">UniProt</a> | <a href="#">Pfam</a> | <a href="#">InterPro</a> |
| SG26_08955 | <a href="#">AJF25848</a> | histidine kinase [Haloarcula sp. CBA1115] ... | <a href="#">CDD</a> | <a href="#">UniProt</a> | <a href="#">Pfam</a> | <a href="#">InterPro</a> |
| SG26_10810 | <a href="#">AJF26181</a> | histidine kinase [Haloarcula sp. CBA1115] ... | <a href="#">CDD</a> | <a href="#">UniProt</a> | <a href="#">Pfam</a> | <a href="#">InterPro</a> |
| SG26_10895 | <a href="#">AJF26197</a> | signal transduction protein [Haloarcula sp... | <a href="#">CDD</a> | <a href="#">UniProt</a> | <a href="#">Pfam</a> | <a href="#">InterPro</a> |
| SG26_11375 | <a href="#">AJF26288</a> | histidine kinase [Haloarcula sp. CBA1115] ... | <a href="#">CDD</a> | <a href="#">UniProt</a> | <a href="#">Pfam</a> | <a href="#">InterPro</a> |
| SG26_12065 | <a href="#">AJF26413</a> | chemotaxis protein CheY [Haloarcula sp. CB... | <a href="#">CDD</a> | <a href="#">UniProt</a> | <a href="#">Pfam</a> | <a href="#">InterPro</a> |
| SG26_12245 | <a href="#">AJF26445</a> | histidine kinase [Haloarcula sp. CBA1115] ... | <a href="#">CDD</a> | <a href="#">UniProt</a> | <a href="#">Pfam</a> | <a href="#">InterPro</a> |
| SG26_12770 | <a href="#">AJF26538</a> | histidine kinase [Haloarcula sp. CBA1115] ... | <a href="#">CDD</a> | <a href="#">UniProt</a> | <a href="#">Pfam</a> | <a href="#">InterPro</a> |
| SG26_13610 | <a href="#">AJF26696</a> | histidine kinase [Haloarcula sp. CBA1115] ... | <a href="#">CDD</a> | <a href="#">UniProt</a> | <a href="#">Pfam</a> | <a href="#">InterPro</a> |
| SG26_13895 | <a href="#">AJF26748</a> | histidine kinase [Haloarcula sp. CBA1115] ... | <a href="#">CDD</a> | <a href="#">UniProt</a> | <a href="#">Pfam</a> | <a href="#">InterPro</a> |
| SG26_13910 | <a href="#">AJF26750</a> | histidine kinase [Haloarcula sp. CBA1115] ... | <a href="#">CDD</a> | <a href="#">UniProt</a> | <a href="#">Pfam</a> | <a href="#">InterPro</a> |
| SG26_16040 | <a href="#">AJF27140</a> | chemotaxis protein CheY [Haloarcula sp. CB... | <a href="#">CDD</a> | <a href="#">UniProt</a> | <a href="#">Pfam</a> | <a href="#">InterPro</a> |
| SG26_16050 | <a href="#">AJF27142</a> | chemotaxis protein CheY [Haloarcula sp. CB... | <a href="#">CDD</a> | <a href="#">UniProt</a> | <a href="#">Pfam</a> | <a href="#">InterPro</a> |
| SG26_16440 | <a href="#">AJF27207</a> | histidine kinase [Haloarcula sp. CBA1115] ... | <a href="#">CDD</a> | <a href="#">UniProt</a> | <a href="#">Pfam</a> | <a href="#">InterPro</a> |
| SG26_16520 | <a href="#">AJF27221</a> | chemotaxis protein CheY [Haloarcula sp. CB... | <a href="#">CDD</a> | <a href="#">UniProt</a> | <a href="#">Pfam</a> | <a href="#">InterPro</a> |
| SG26_06905 | <a href="#">AJF27389</a> | protein kinase [Haloarcula sp. CBA1115] ...   | <a href="#">CDD</a> | <a href="#">UniProt</a> | <a href="#">Pfam</a> | <a href="#">InterPro</a> |
| SG26_11200 | <a href="#">AJF27435</a> | histidine kinase [Haloarcula sp. CBA1115] ... | <a href="#">CDD</a> | <a href="#">UniProt</a> | <a href="#">Pfam</a> | <a href="#">InterPro</a> |
| SG26_15945 | <a href="#">AJF27479</a> | histidine kinase [Haloarcula sp. CBA1115] ... | <a href="#">CDD</a> | <a href="#">UniProt</a> | <a href="#">Pfam</a> | <a href="#">InterPro</a> |
| SG26_17995 | <a href="#">AJF27656</a> | diguanylate cyclase (plasmid) [Haloarcula ... | <a href="#">CDD</a> | <a href="#">UniProt</a> | <a href="#">Pfam</a> | <a href="#">InterPro</a> |

**REC only**

|            |                          |                                               |                     |                         |                      |                          |
|------------|--------------------------|-----------------------------------------------|---------------------|-------------------------|----------------------|--------------------------|
| SG26_02825 | <a href="#">AJF24721</a> | chemotaxis protein CheY [Haloarcula sp. CB... | <a href="#">CDD</a> | <a href="#">UniProt</a> | <a href="#">Pfam</a> | <a href="#">InterPro</a> |
| SG26_05860 | <a href="#">AJF25288</a> | regulator [Haloarcula sp. CBA1115] .....      | <a href="#">CDD</a> | <a href="#">UniProt</a> | <a href="#">Pfam</a> | <a href="#">InterPro</a> |
| SG26_13905 | <a href="#">AJF27459</a> | chemotaxis protein CheY [Haloarcula sp. CB... | <a href="#">CDD</a> | <a href="#">UniProt</a> | <a href="#">Pfam</a> | <a href="#">InterPro</a> |

**REC-HisK**

|            |                          |                                               |                     |                         |                      |                          |
|------------|--------------------------|-----------------------------------------------|---------------------|-------------------------|----------------------|--------------------------|
| SG26_02830 | <a href="#">AJF24722</a> | transcriptional regulator [Haloarcula sp. ... | <a href="#">CDD</a> | <a href="#">UniProt</a> | <a href="#">Pfam</a> | <a href="#">InterPro</a> |
| SG26_03360 | <a href="#">AJF24813</a> | hypothetical protein SG26_03360 [Haloarcul... | <a href="#">CDD</a> | <a href="#">UniProt</a> | <a href="#">Pfam</a> | <a href="#">InterPro</a> |
| SG26_03415 | <a href="#">AJF24824</a> | chemotaxis protein CheY [Haloarcula sp. CB... | <a href="#">CDD</a> | <a href="#">UniProt</a> | <a href="#">Pfam</a> | <a href="#">InterPro</a> |
| SG26_04210 | <a href="#">AJF24974</a> | chemotaxis protein CheY [Haloarcula sp. CB... | <a href="#">CDD</a> | <a href="#">UniProt</a> | <a href="#">Pfam</a> | <a href="#">InterPro</a> |
| SG26_06545 | <a href="#">AJF25411</a> | chemotaxis protein CheY [Haloarcula sp. CB... | <a href="#">CDD</a> | <a href="#">UniProt</a> | <a href="#">Pfam</a> | <a href="#">InterPro</a> |
| SG26_06625 | <a href="#">AJF25424</a> | histidine kinase [Haloarcula sp. CBA1115] ... | <a href="#">CDD</a> | <a href="#">UniProt</a> | <a href="#">Pfam</a> | <a href="#">InterPro</a> |
| SG26_07185 | <a href="#">AJF25525</a> | histidine kinase [Haloarcula sp. CBA1115] ... | <a href="#">CDD</a> | <a href="#">UniProt</a> | <a href="#">Pfam</a> | <a href="#">InterPro</a> |
| SG26_10865 | <a href="#">AJF26191</a> | chemotaxis protein CheY [Haloarcula sp. CB... | <a href="#">CDD</a> | <a href="#">UniProt</a> | <a href="#">Pfam</a> | <a href="#">InterPro</a> |
| SG26_10925 | <a href="#">AJF26203</a> | chemotaxis protein CheY [Haloarcula sp. CB... | <a href="#">CDD</a> | <a href="#">UniProt</a> | <a href="#">Pfam</a> | <a href="#">InterPro</a> |
| SG26_12025 | <a href="#">AJF26406</a> | chemotaxis protein CheY [Haloarcula sp. CB... | <a href="#">CDD</a> | <a href="#">UniProt</a> | <a href="#">Pfam</a> | <a href="#">InterPro</a> |
| SG26_13550 | <a href="#">AJF26684</a> | chemotaxis protein CheY [Haloarcula sp. CB... | <a href="#">CDD</a> | <a href="#">UniProt</a> | <a href="#">Pfam</a> | <a href="#">InterPro</a> |
| SG26_13620 | <a href="#">AJF26698</a> | signal transduction protein [Haloarcula sp... | <a href="#">CDD</a> | <a href="#">UniProt</a> | <a href="#">Pfam</a> | <a href="#">InterPro</a> |
| SG26_13900 | <a href="#">AJF26749</a> | histidine kinase [Haloarcula sp. CBA1115] ... | <a href="#">CDD</a> | <a href="#">UniProt</a> | <a href="#">Pfam</a> | <a href="#">InterPro</a> |
| SG26_15195 | <a href="#">AJF26981</a> | chemotaxis protein CheY [Haloarcula sp. CB... | <a href="#">CDD</a> | <a href="#">UniProt</a> | <a href="#">Pfam</a> | <a href="#">InterPro</a> |
| SG26_15430 | <a href="#">AJF27026</a> | chemotaxis protein CheY [Haloarcula sp. CB... | <a href="#">CDD</a> | <a href="#">UniProt</a> | <a href="#">Pfam</a> | <a href="#">InterPro</a> |
| SG26_13020 | <a href="#">AJF27451</a> | signal transduction protein [Haloarcula sp... | <a href="#">CDD</a> | <a href="#">UniProt</a> | <a href="#">Pfam</a> | <a href="#">InterPro</a> |
| SG26_14170 | <a href="#">AJF27467</a> | chemotaxis protein CheY [Haloarcula sp. CB... | <a href="#">CDD</a> | <a href="#">UniProt</a> | <a href="#">Pfam</a> | <a href="#">InterPro</a> |
| SG26_17900 | <a href="#">AJF27638</a> | histidine kinase (plasmid) [Haloarcula sp...  | <a href="#">CDD</a> | <a href="#">UniProt</a> | <a href="#">Pfam</a> | <a href="#">InterPro</a> |
| SG26_17895 | <a href="#">AJF27814</a> | chemotaxis protein CheY (plasmid) [Haloarc... | <a href="#">CDD</a> | <a href="#">UniProt</a> | <a href="#">Pfam</a> | <a href="#">InterPro</a> |

**REC-CheB**

|            |                          |                                               |                     |                         |                      |                          |
|------------|--------------------------|-----------------------------------------------|---------------------|-------------------------|----------------------|--------------------------|
| SG26_05910 | <a href="#">AJF25297</a> | chemotaxis protein [Haloarcula sp. CBA1115... | <a href="#">CDD</a> | <a href="#">UniProt</a> | <a href="#">Pfam</a> | <a href="#">InterPro</a> |
|------------|--------------------------|-----------------------------------------------|---------------------|-------------------------|----------------------|--------------------------|

**REC-PAS\GAF**

|            |                          |                                               |                     |                         |                      |                          |
|------------|--------------------------|-----------------------------------------------|---------------------|-------------------------|----------------------|--------------------------|
| SG26_05495 | <a href="#">AJF25221</a> | chemotaxis protein CheY [Haloarcula sp. CB... | <a href="#">CDD</a> | <a href="#">UniProt</a> | <a href="#">Pfam</a> | <a href="#">InterPro</a> |
| SG26_07610 | <a href="#">AJF25606</a> | HTR-like protein [Haloarcula sp. CBA1115] ... | <a href="#">CDD</a> | <a href="#">UniProt</a> | <a href="#">Pfam</a> | <a href="#">InterPro</a> |
| SG26_14645 | <a href="#">AJF26875</a> | chemotaxis protein CheY [Haloarcula sp. CB... | <a href="#">CDD</a> | <a href="#">UniProt</a> | <a href="#">Pfam</a> | <a href="#">InterPro</a> |
| SG26_16640 | <a href="#">AJF27244</a> | hypothetical protein SG26_16640 [Haloarcul... | <a href="#">CDD</a> | <a href="#">UniProt</a> | <a href="#">Pfam</a> | <a href="#">InterPro</a> |
| SG26_13250 | <a href="#">AJF26631</a> | chemotaxis protein CheY [Haloarcula sp. CB... | <a href="#">CDD</a> | <a href="#">UniProt</a> | <a href="#">Pfam</a> | <a href="#">InterPro</a> |

**REC-HalX**

|            |                          |                                               |                     |                         |                      |                          |
|------------|--------------------------|-----------------------------------------------|---------------------|-------------------------|----------------------|--------------------------|
| SG26_03440 | <a href="#">AJF24828</a> | DNA-binding protein [Haloarcula sp. CBA11...  | <a href="#">CDD</a> | <a href="#">UniProt</a> | <a href="#">Pfam</a> | <a href="#">InterPro</a> |
| SG26_10610 | <a href="#">AJF26145</a> | DNA-binding protein [Haloarcula sp. CBA11...  | <a href="#">CDD</a> | <a href="#">UniProt</a> | <a href="#">Pfam</a> | <a href="#">InterPro</a> |
| SG26_10950 | <a href="#">AJF26208</a> | histidine kinase [Haloarcula sp. CBA1115] ... | <a href="#">CDD</a> | <a href="#">UniProt</a> | <a href="#">Pfam</a> | <a href="#">InterPro</a> |
| SG26_13270 | <a href="#">AJF26633</a> | HoxA transcriptional regulator [Haloarcula... | <a href="#">CDD</a> | <a href="#">UniProt</a> | <a href="#">Pfam</a> | <a href="#">InterPro</a> |

|            |                          |                                                |                     |                         |                      |                          |
|------------|--------------------------|------------------------------------------------|---------------------|-------------------------|----------------------|--------------------------|
| SG26_13340 | <a href="#">AJF26645</a> | HoxA transcriptional regulator [Haloarcula...] | <a href="#">CDD</a> | <a href="#">UniProt</a> | <a href="#">Pfam</a> | <a href="#">InterPro</a> |
| SG26_16540 | <a href="#">AJF27225</a> | DNA-binding protein [Haloarcula sp. CBA111...] | <a href="#">CDD</a> | <a href="#">UniProt</a> | <a href="#">Pfam</a> | <a href="#">InterPro</a> |
| <b>BAT</b> |                          |                                                |                     |                         |                      |                          |
| SG26_17910 | <a href="#">AJF27640</a> | bacterio-opsin activator (plasmid) [Haloar...] | <a href="#">CDD</a> | <a href="#">UniProt</a> | <a href="#">Pfam</a> | <a href="#">InterPro</a> |
| SG26_18225 | <a href="#">AJF27697</a> | bacterio-opsin activator (plasmid) [Haloar...] | <a href="#">CDD</a> | <a href="#">UniProt</a> | <a href="#">Pfam</a> | <a href="#">InterPro</a> |

### Halobacterium hubeiense

#### **HisK, no REC**

|           |                          |                                                |                     |                         |                      |                          |
|-----------|--------------------------|------------------------------------------------|---------------------|-------------------------|----------------------|--------------------------|
| HHUB_1728 | <a href="#">CQH51403</a> | histidine kinase [Halobacterium hubeiense]...  | <a href="#">CDD</a> | <a href="#">UniProt</a> | <a href="#">Pfam</a> | <a href="#">InterPro</a> |
| HHUB_1729 | <a href="#">CQH51412</a> | sensor box histidine kinase [Halobacterium...] | <a href="#">CDD</a> | <a href="#">UniProt</a> | <a href="#">Pfam</a> | <a href="#">InterPro</a> |
| HHUB_1816 | <a href="#">CQH52193</a> | histidine kinase [Halobacterium hubeiense]...  | <a href="#">CDD</a> | <a href="#">UniProt</a> | <a href="#">Pfam</a> | <a href="#">InterPro</a> |
| HHUB_1911 | <a href="#">CQH52992</a> | sensor box histidine kinase [Halobacterium...] | <a href="#">CDD</a> | <a href="#">UniProt</a> | <a href="#">Pfam</a> | <a href="#">InterPro</a> |
| HHUB_2038 | <a href="#">CQH54053</a> | sensor box histidine kinase [Halobacterium...] | <a href="#">CDD</a> | <a href="#">UniProt</a> | <a href="#">Pfam</a> | <a href="#">InterPro</a> |
| HHUB_2095 | <a href="#">CQH54516</a> | sensor box histidine kinase [Halobacterium...] | <a href="#">CDD</a> | <a href="#">UniProt</a> | <a href="#">Pfam</a> | <a href="#">InterPro</a> |
| HHUB_2110 | <a href="#">CQH54635</a> | sensor box histidine kinase [Halobacterium...] | <a href="#">CDD</a> | <a href="#">UniProt</a> | <a href="#">Pfam</a> | <a href="#">InterPro</a> |
| HHUB_2152 | <a href="#">CQH54925</a> | taxis sensor histidine kinase CheA [Haloba...] | <a href="#">CDD</a> | <a href="#">UniProt</a> | <a href="#">Pfam</a> | <a href="#">InterPro</a> |
| HHUB_2376 | <a href="#">CQH56406</a> | sensor box histidine kinase [Halobacterium...] | <a href="#">CDD</a> | <a href="#">UniProt</a> | <a href="#">Pfam</a> | <a href="#">InterPro</a> |
| HHUB_2520 | <a href="#">CQH57351</a> | sensor box histidine kinase [Halobacterium...] | <a href="#">CDD</a> | <a href="#">UniProt</a> | <a href="#">Pfam</a> | <a href="#">InterPro</a> |
| HHUB_2546 | <a href="#">CQH57478</a> | sensor box histidine kinase [Halobacterium...] | <a href="#">CDD</a> | <a href="#">UniProt</a> | <a href="#">Pfam</a> | <a href="#">InterPro</a> |
| HHUB_2629 | <a href="#">CQH57920</a> | histidine kinase [Halobacterium hubeiense]...  | <a href="#">CDD</a> | <a href="#">UniProt</a> | <a href="#">Pfam</a> | <a href="#">InterPro</a> |
| HHUB_3249 | <a href="#">CQH60575</a> | sensor box histidine kinase [Halobacterium...] | <a href="#">CDD</a> | <a href="#">UniProt</a> | <a href="#">Pfam</a> | <a href="#">InterPro</a> |
| HHUB_3290 | <a href="#">CQH60769</a> | histidine kinase [Halobacterium hubeiense]...  | <a href="#">CDD</a> | <a href="#">UniProt</a> | <a href="#">Pfam</a> | <a href="#">InterPro</a> |
| HHUB_3476 | <a href="#">CQH61531</a> | sensor box histidine kinase [Halobacterium...] | <a href="#">CDD</a> | <a href="#">UniProt</a> | <a href="#">Pfam</a> | <a href="#">InterPro</a> |
| HHUB_3576 | <a href="#">CQH61886</a> | MEDS domain histidine kinase [Halobacteriu...] | <a href="#">CDD</a> | <a href="#">UniProt</a> | <a href="#">Pfam</a> | <a href="#">InterPro</a> |
| HHUB_4136 | <a href="#">CQH63613</a> | sensor box histidine kinase (plasmid) [Hal...] | <a href="#">CDD</a> | <a href="#">UniProt</a> | <a href="#">Pfam</a> | <a href="#">InterPro</a> |
| HHUB_4197 | <a href="#">CQH63826</a> | MEDS domain histidine kinase (plasmid) [Ha...] | <a href="#">CDD</a> | <a href="#">UniProt</a> | <a href="#">Pfam</a> | <a href="#">InterPro</a> |

#### **REC only**

|           |                          |                                                |                     |                         |                      |                          |
|-----------|--------------------------|------------------------------------------------|---------------------|-------------------------|----------------------|--------------------------|
| HHUB_2154 | <a href="#">CQH54936</a> | response regulator CheY [Halobacterium hub...] | <a href="#">CDD</a> | <a href="#">UniProt</a> | <a href="#">Pfam</a> | <a href="#">InterPro</a> |
| HHUB_2521 | <a href="#">CQH57358</a> | receiver box response regulator [Halobacte...] | <a href="#">CDD</a> | <a href="#">UniProt</a> | <a href="#">Pfam</a> | <a href="#">InterPro</a> |

#### **REC-HisK**

|           |                          |                                                |                     |                         |                      |                          |
|-----------|--------------------------|------------------------------------------------|---------------------|-------------------------|----------------------|--------------------------|
| HHUB_1789 | <a href="#">CQH51931</a> | receiver/sensor box histidine kinase [Halo...] | <a href="#">CDD</a> | <a href="#">UniProt</a> | <a href="#">Pfam</a> | <a href="#">InterPro</a> |
| HHUB_1988 | <a href="#">CQH53656</a> | receiver/sensor box histidine kinase [Halo...] | <a href="#">CDD</a> | <a href="#">UniProt</a> | <a href="#">Pfam</a> | <a href="#">InterPro</a> |
| HHUB_2058 | <a href="#">CQH54205</a> | receiver/sensor box histidine kinase [Halo...] | <a href="#">CDD</a> | <a href="#">UniProt</a> | <a href="#">Pfam</a> | <a href="#">InterPro</a> |
| HHUB_2176 | <a href="#">CQH55070</a> | sensor box histidine kinase [Halobacterium...] | <a href="#">CDD</a> | <a href="#">UniProt</a> | <a href="#">Pfam</a> | <a href="#">InterPro</a> |
| HHUB_2382 | <a href="#">CQH56443</a> | receiver/sensor box histidine kinase [Halo...] | <a href="#">CDD</a> | <a href="#">UniProt</a> | <a href="#">Pfam</a> | <a href="#">InterPro</a> |
| HHUB_2407 | <a href="#">CQH56616</a> | receiver/sensor box histidine kinase [Halo...] | <a href="#">CDD</a> | <a href="#">UniProt</a> | <a href="#">Pfam</a> | <a href="#">InterPro</a> |

#### **REC-CheB**

|           |                          |                                                   |                     |                         |                      |                          |
|-----------|--------------------------|---------------------------------------------------|---------------------|-------------------------|----------------------|--------------------------|
| HHUB_2153 | <a href="#">CQH54930</a> | protein-glutamate methyltransferase CheB [Hal...] | <a href="#">CDD</a> | <a href="#">UniProt</a> | <a href="#">Pfam</a> | <a href="#">InterPro</a> |
|-----------|--------------------------|---------------------------------------------------|---------------------|-------------------------|----------------------|--------------------------|

#### **REC-PAS\GAF**

|           |                          |                                                |                     |                         |                      |                          |
|-----------|--------------------------|------------------------------------------------|---------------------|-------------------------|----------------------|--------------------------|
| HHUB_2544 | <a href="#">CQH57469</a> | receiver/sensor box [Halobacterium hubeien...] | <a href="#">CDD</a> | <a href="#">UniProt</a> | <a href="#">Pfam</a> | <a href="#">InterPro</a> |
| HHUB_1699 | <a href="#">CQH51141</a> | receiver box response regulator [Halobacte...] | <a href="#">CDD</a> | <a href="#">UniProt</a> | <a href="#">Pfam</a> | <a href="#">InterPro</a> |

#### **REC-HalX**

|           |                          |                                                |                     |                         |                      |                          |
|-----------|--------------------------|------------------------------------------------|---------------------|-------------------------|----------------------|--------------------------|
| HHUB_1730 | <a href="#">CQH51423</a> | receiver box response regulator [Halobacte...] | <a href="#">CDD</a> | <a href="#">UniProt</a> | <a href="#">Pfam</a> | <a href="#">InterPro</a> |
| HHUB_1910 | <a href="#">CQH52985</a> | receiver box response regulator [Halobacte...] | <a href="#">CDD</a> | <a href="#">UniProt</a> | <a href="#">Pfam</a> | <a href="#">InterPro</a> |
| HHUB_1912 | <a href="#">CQH53000</a> | receiver box response regulator [Halobacte...] | <a href="#">CDD</a> | <a href="#">UniProt</a> | <a href="#">Pfam</a> | <a href="#">InterPro</a> |
| HHUB_2096 | <a href="#">CQH54524</a> | receiver box response regulator [Halobacte...] | <a href="#">CDD</a> | <a href="#">UniProt</a> | <a href="#">Pfam</a> | <a href="#">InterPro</a> |
| HHUB_2174 | <a href="#">CQH55056</a> | receiver box response regulator [Halobacte...] | <a href="#">CDD</a> | <a href="#">UniProt</a> | <a href="#">Pfam</a> | <a href="#">InterPro</a> |
| HHUB_2545 | <a href="#">CQH57473</a> | receiver box response regulator [Halobacte...] | <a href="#">CDD</a> | <a href="#">UniProt</a> | <a href="#">Pfam</a> | <a href="#">InterPro</a> |

#### **BAT**

|           |                          |                                               |                     |                         |                      |                          |
|-----------|--------------------------|-----------------------------------------------|---------------------|-------------------------|----------------------|--------------------------|
| HHUB_2522 | <a href="#">CQH57367</a> | receiver/sensor/bat box HTH-10 family tran... | <a href="#">CDD</a> | <a href="#">UniProt</a> | <a href="#">Pfam</a> | <a href="#">InterPro</a> |
| HHUB_4212 | <a href="#">CQH63873</a> | receiver/sensor/bat box HTH-10 family tran... | <a href="#">CDD</a> | <a href="#">UniProt</a> | <a href="#">Pfam</a> | <a href="#">InterPro</a> |

### Halobacterium salinarum NRC-1

#### **HisK, no REC**

|           |                          |                                                |                     |                         |                      |                          |
|-----------|--------------------------|------------------------------------------------|---------------------|-------------------------|----------------------|--------------------------|
| VNG_0716G | <a href="#">AAG19197</a> | sensory histidine protein kinase homolog [...] | <a href="#">CDD</a> | <a href="#">UniProt</a> | <a href="#">Pfam</a> | <a href="#">InterPro</a> |
| VNG_0736G | <a href="#">AAG19214</a> | signal-transducing histidine kinase homolo...  | <a href="#">CDD</a> | <a href="#">UniProt</a> | <a href="#">Pfam</a> | <a href="#">InterPro</a> |
| VNG_0916G | <a href="#">AAG19348</a> | adaptive-response sensory-kinase [Halobact...] | <a href="#">CDD</a> | <a href="#">UniProt</a> | <a href="#">Pfam</a> | <a href="#">InterPro</a> |
| VNG_0971G | <a href="#">AAG19393</a> | chemotaxis protein [Halobacterium salinaru...] | <a href="#">CDD</a> | <a href="#">UniProt</a> | <a href="#">Pfam</a> | <a href="#">InterPro</a> |
| VNG_1175G | <a href="#">AAG19550</a> | PhoR protein homolog [Halobacterium salina...] | <a href="#">CDD</a> | <a href="#">UniProt</a> | <a href="#">Pfam</a> | <a href="#">InterPro</a> |
| VNG_1193C | <a href="#">AAG19566</a> | conserved hypothetical protein [Halobacter...] | <a href="#">CDD</a> | <a href="#">UniProt</a> | <a href="#">Pfam</a> | <a href="#">InterPro</a> |
| VNG_1234C | <a href="#">AAG19596</a> | conserved hypothetical protein [Halobacter...] | <a href="#">CDD</a> | <a href="#">UniProt</a> | <a href="#">Pfam</a> | <a href="#">InterPro</a> |
| VNG_1374G | <a href="#">AAG19701</a> | signal-transducing histidine kinase homolo...  | <a href="#">CDD</a> | <a href="#">UniProt</a> | <a href="#">Pfam</a> | <a href="#">InterPro</a> |
| VNG_1375C | <a href="#">AAG19702</a> | conserved hypothetical protein [Halobacter...] | <a href="#">CDD</a> | <a href="#">UniProt</a> | <a href="#">Pfam</a> | <a href="#">InterPro</a> |
| VNG_2037C | <a href="#">AAG20198</a> | conserved hypothetical protein [Halobacter...] | <a href="#">CDD</a> | <a href="#">UniProt</a> | <a href="#">Pfam</a> | <a href="#">InterPro</a> |
| VNG_2180C | <a href="#">AAG20315</a> | conserved hypothetical protein [Halobacter...] | <a href="#">CDD</a> | <a href="#">UniProt</a> | <a href="#">Pfam</a> | <a href="#">InterPro</a> |

#### **REC only**

|           |                          |                                                       |                     |                         |                      |                          |
|-----------|--------------------------|-------------------------------------------------------|---------------------|-------------------------|----------------------|--------------------------|
| VNG_0974G | <a href="#">AAG19395</a> | <b>chemotaxis protein CheY</b> [Halobacterium sal...] | <a href="#">CDD</a> | <a href="#">UniProt</a> | <a href="#">Pfam</a> | <a href="#">InterPro</a> |
|-----------|--------------------------|-------------------------------------------------------|---------------------|-------------------------|----------------------|--------------------------|

#### **REC-HisK**

|           |                          |                                                |                     |                         |                      |                          |
|-----------|--------------------------|------------------------------------------------|---------------------|-------------------------|----------------------|--------------------------|
| VNG_2334C | <a href="#">AAG20440</a> | conserved hypothetical protein [Halobacter...] | <a href="#">CDD</a> | <a href="#">UniProt</a> | <a href="#">Pfam</a> | <a href="#">InterPro</a> |
| VNG_6035G | <a href="#">AAG20731</a> | Htr-like protein (plasmid) [Halobacterium ...] | <a href="#">CDD</a> | <a href="#">UniProt</a> | <a href="#">Pfam</a> | <a href="#">InterPro</a> |

#### **REC-CheB**

|           |                          |                                                       |                     |                         |                      |                          |
|-----------|--------------------------|-------------------------------------------------------|---------------------|-------------------------|----------------------|--------------------------|
| VNG_0973G | <a href="#">AAG19394</a> | <b>chemotaxis protein CheB</b> [Halobacterium sal...] | <a href="#">CDD</a> | <a href="#">UniProt</a> | <a href="#">Pfam</a> | <a href="#">InterPro</a> |
|-----------|--------------------------|-------------------------------------------------------|---------------------|-------------------------|----------------------|--------------------------|

#### **REC-HalX**

|           |                          |                                                |                     |                         |                      |                          |
|-----------|--------------------------|------------------------------------------------|---------------------|-------------------------|----------------------|--------------------------|
| VNG_0735G | <a href="#">AAG19213</a> | HoxA-like transcriptional regulator [Halob...] | <a href="#">CDD</a> | <a href="#">UniProt</a> | <a href="#">Pfam</a> | <a href="#">InterPro</a> |
| VNG_0917G | <a href="#">AAG19349</a> | transcriptional regulatory protein [Haloba...] | <a href="#">CDD</a> | <a href="#">UniProt</a> | <a href="#">Pfam</a> | <a href="#">InterPro</a> |
| VNG_2036G | <a href="#">AAG20197</a> | HoxA-like transcriptional regulator [Halob...] | <a href="#">CDD</a> | <a href="#">UniProt</a> | <a href="#">Pfam</a> | <a href="#">InterPro</a> |

#### **BAT**

| VNG_1464G                           | <a href="#">AAG19769</a> | <b>Bacterioopsin transcriptional activator Ba...</b> | <a href="#">CDD</a> | <a href="#">UniProt</a> | <a href="#">Pfam</a> | <a href="#">InterPro</a>              |
|-------------------------------------|--------------------------|------------------------------------------------------|---------------------|-------------------------|----------------------|---------------------------------------|
| <b><u>Halobacterium sp. DL1</u></b> |                          |                                                      |                     |                         |                      |                                       |
| <b>HisK, no REC</b>                 |                          |                                                      |                     |                         |                      |                                       |
| HALDL1_01605                        | <a href="#">AHG02470</a> | histidine kinase [Halobacterium sp. DL1]...          | <a href="#">CDD</a> | <a href="#">UniProt</a> | <a href="#">Pfam</a> | <a href="#">InterPro</a>              |
| HALDL1_07930                        | <a href="#">AHG03532</a> | histidine kinase [Halobacterium sp. DL1]...          | <a href="#">CDD</a> | <a href="#">UniProt</a> | <a href="#">Pfam</a> | <a href="#">InterPro</a>              |
| HALDL1_08070                        | <a href="#">AHG03556</a> | ATPase [Halobacterium sp. DL1] ...                   | <a href="#">CDD</a> | <a href="#">UniProt</a> | <a href="#">Pfam</a> | <a href="#">InterPro</a>              |
| HALDL1_08930                        | <a href="#">AHG03710</a> | chemotaxis protein CheY [Halobacterium s...          | <a href="#">CDD</a> | <a href="#">UniProt</a> | <a href="#">Pfam</a> | <a href="#">InterPro</a>              |
| HALDL1_09165                        | <a href="#">AHG03752</a> | chemotaxis protein CheA [Halobacterium s...          | <a href="#">CDD</a> | <a href="#">UniProt</a> | <a href="#">Pfam</a> | <a href="#">InterPro</a>              |
| HALDL1_09575                        | <a href="#">AHG03823</a> | histidine kinase [Halobacterium sp. DL1]...          | <a href="#">CDD</a> | <a href="#">UniProt</a> | <a href="#">Pfam</a> | <a href="#">InterPro</a>              |
| HALDL1_10925                        | <a href="#">AHG04054</a> | histidine kinase [Halobacterium sp. DL1]...          | <a href="#">CDD</a> | <a href="#">UniProt</a> | <a href="#">Pfam</a> | <a href="#">InterPro</a>              |
| HALDL1_12055                        | <a href="#">AHG04244</a> | ATPase [Halobacterium sp. DL1] ...                   | <a href="#">CDD</a> | <a href="#">UniProt</a> | <a href="#">Pfam</a> | <a href="#">InterPro</a>              |
| HALDL1_12510                        | <a href="#">AHG04326</a> | histidine kinase [Halobacterium sp. DL1]...          | <a href="#">CDD</a> | <a href="#">UniProt</a> | <a href="#">Pfam</a> | <a href="#">InterPro</a>              |
| HALDL1_13135                        | <a href="#">AHG04433</a> | histidine kinase [Halobacterium sp. DL1]...          | <a href="#">CDD</a> | <a href="#">UniProt</a> | <a href="#">Pfam</a> | <a href="#">InterPro</a>              |
| HALDL1_13475                        | <a href="#">AHG04491</a> | histidine kinase [Halobacterium sp. DL1]...          | <a href="#">CDD</a> | <a href="#">UniProt</a> | <a href="#">Pfam</a> | <a href="#">InterPro</a>              |
| HALDL1_13795                        | <a href="#">AHG04538</a> | histidine kinase [Halobacterium sp. DL1]...          | <a href="#">CDD</a> | <a href="#">UniProt</a> | <a href="#">Pfam</a> | <a href="#">InterPro</a>              |
| HALDL1_14765                        | <a href="#">AHG04711</a> | histidine kinase [Halobacterium sp. DL1]...          | <a href="#">CDD</a> | <a href="#">UniProt</a> | <a href="#">Pfam</a> | <a href="#">InterPro</a>              |
| HALDL1_14850                        | <a href="#">AHG04722</a> | histidine kinase [Halobacterium sp. DL1]...          | <a href="#">CDD</a> | <a href="#">UniProt</a> | <a href="#">Pfam</a> | <a href="#">InterPro</a>              |
| HALDL1_15195                        | <a href="#">AHG04785</a> | histidine kinase [Halobacterium sp. DL1]...          | <a href="#">CDD</a> | <a href="#">UniProt</a> | <a href="#">Pfam</a> | <a href="#">InterPro</a>              |
| HALDL1_16045                        | <a href="#">AHG04933</a> | histidine kinase [Halobacterium sp. DL1]...          | <a href="#">CDD</a> | <a href="#">UniProt</a> | <a href="#">Pfam</a> | <a href="#">InterPro</a>              |
| HALDL1_16380                        | <a href="#">AHG05000</a> | histidine kinase [Halobacterium sp. DL1]...          | <a href="#">CDD</a> | <a href="#">UniProt</a> | <a href="#">Pfam</a> | <a href="#">InterPro</a>              |
| HALDL1_14015                        | <a href="#">AHG05376</a> | hypothetical protein HALDL1_14015 [Halob...          | <a href="#">CDD</a> | <a href="#">UniProt</a> | <a href="#">Pfam</a> | <a href="#">InterPro</a>              |
| <b>REC only</b>                     |                          |                                                      |                     |                         |                      |                                       |
| HALDL1_09175                        | <a href="#">AHG03754</a> | chemotaxis protein CheY [Halobacterium s...          | <a href="#">CDD</a> | <a href="#">UniProt</a> | <a href="#">Pfam</a> | <a href="#">InterPro</a>              |
| HALDL1_11895                        | <a href="#">AHG04219</a> | chemotaxis protein CheY [Halobacterium s...          | <a href="#">CDD</a> | <a href="#">UniProt</a> | <a href="#">Pfam</a> | <a href="#">InterPro</a>              |
| HALDL1_15945                        | <a href="#">AHG04916</a> | histidine kinase [Halobacterium sp. DL1]...          | <a href="#">CDD</a> | <a href="#">UniProt</a> | <a href="#">Pfam</a> | <a href="#">InterPro</a>              |
| HALDL1_15340                        | <a href="#">AHG04813</a> | response regulator [Halobacterium sp. DL...          | <a href="#">CDD</a> | <a href="#">UniProt</a> | <a href="#">Pfam</a> | <a href="#">InterPro</a>              |
| HALDL1_16385                        | <a href="#">AHG05001</a> | chemotaxis protein CheY [Halobacterium s...          | <a href="#">CDD</a> | <a href="#">UniProt</a> | <a href="#">Pfam</a> | <a href="#">InterPro</a>              |
| <b>REC-HisK</b>                     |                          |                                                      |                     |                         |                      |                                       |
| HALDL1_02160                        | <a href="#">AHG05087</a> | hypothetical protein HALDL1_02160 [Halob...          | <a href="#">CDD</a> | <a href="#">UniProt</a> | <a href="#">Pfam</a> | <a href="#">InterPro</a>              |
| HALDL1_05165                        | <a href="#">AHG05182</a> | hypothetical protein HALDL1_05165 [Halob...          | <a href="#">CDD</a> | <a href="#">UniProt</a> | <a href="#">Pfam</a> | <a href="#">InterPro</a>              |
| HALDL1_13390                        | <a href="#">AHG05353</a> | hypothetical protein HALDL1_13390 [Halob...          | <a href="#">CDD</a> | <a href="#">UniProt</a> | <a href="#">Pfam</a> | <a href="#">InterPro</a>              |
| HALDL1_15400                        | <a href="#">AHG05403</a> | hypothetical protein HALDL1_15400 [Halob...          | <a href="#">CDD</a> | <a href="#">UniProt</a> | <a href="#">Pfam</a> | <a href="#">InterPro</a>              |
| <b>REC-CheB</b>                     |                          |                                                      |                     |                         |                      |                                       |
| HALDL1_09170                        | <a href="#">AHG03753</a> | chemotaxis protein [Halobacterium sp. DL...          | <a href="#">CDD</a> | <a href="#">UniProt</a> | <a href="#">Pfam</a> | <a href="#">InterPro</a>              |
| <b>REC-PAS</b>                      |                          |                                                      |                     |                         |                      |                                       |
| HALDL1_08820                        | <a href="#">AHG05257</a> | hypothetical protein HALDL1_08820 [Halob...          | <a href="#">CDD</a> | <a href="#">UniProt</a> | <a href="#">Pfam</a> | <a href="#">InterPro</a>              |
| <b>REC-HalX</b>                     |                          |                                                      |                     |                         |                      |                                       |
| HALDL1_08065                        | <a href="#">AHG03555</a> | DNA-binding protein [Halobacterium sp. D...          | <a href="#">CDD</a> | <a href="#">UniProt</a> | <a href="#">Pfam</a> | <a href="#">InterPro</a>              |
| HALDL1_08935                        | <a href="#">AHG03711</a> | DNA-binding protein [Halobacterium sp. D...          | <a href="#">CDD</a> | <a href="#">UniProt</a> | <a href="#">Pfam</a> | <a href="#">InterPro</a>              |
| HALDL1_09570                        | <a href="#">AHG03822</a> | DNA-binding protein [Halobacterium sp. D...          | <a href="#">CDD</a> | <a href="#">UniProt</a> | <a href="#">Pfam</a> | <a href="#">InterPro</a>              |
| HALDL1_13790                        | <a href="#">AHG04537</a> | DNA-binding protein [Halobacterium sp. D...          | <a href="#">CDD</a> | <a href="#">UniProt</a> | <a href="#">Pfam</a> | <a href="#">InterPro</a>              |
| <b>BAT</b>                          |                          |                                                      |                     |                         |                      |                                       |
| HALDL1_11890                        | <a href="#">AHG05321</a> | hypothetical protein HALDL1_11890 [Halob...          | <a href="#">CDD</a> | <a href="#">UniProt</a> | <a href="#">Pfam</a> | <a href="#">InterPro</a>              |
| <b>REC-HalOD1</b>                   |                          |                                                      |                     |                         |                      |                                       |
| HALDL1_15395                        | <a href="#">AHG04822</a> | chemotaxis protein CheY [Halobacterium s...          | <a href="#">CDD</a> | <a href="#">UniProt</a> | <a href="#">Pfam</a> | <a href="#">InterPro</a> (REC-HalOD1) |

|                                         |                          |                                               |                     |                         |                      |                          |
|-----------------------------------------|--------------------------|-----------------------------------------------|---------------------|-------------------------|----------------------|--------------------------|
| <b><u>Halobiforma lacisalsi AJ5</u></b> |                          |                                               |                     |                         |                      |                          |
| <b>HisK, no REC</b>                     |                          |                                               |                     |                         |                      |                          |
| C445_00475                              | <a href="#">EMA37876</a> | signal transduction histidine kinase CheA ... | <a href="#">CDD</a> | <a href="#">UniProt</a> | <a href="#">Pfam</a> | <a href="#">InterPro</a> |
| C445_00500                              | <a href="#">EMA37881</a> | signal-transducing histidine kinase [Halob... | <a href="#">CDD</a> | <a href="#">UniProt</a> | <a href="#">Pfam</a> | <a href="#">InterPro</a> |
| C445_00711                              | <a href="#">EMA37365</a> | PAS/PAC sensor signal transduction histidi... | <a href="#">CDD</a> | <a href="#">UniProt</a> | <a href="#">Pfam</a> | <a href="#">InterPro</a> |
| C445_02616                              | <a href="#">EMA37097</a> | HTR-like protein [Halobiforma lacisalsi AJ... | <a href="#">CDD</a> | <a href="#">UniProt</a> | <a href="#">Pfam</a> | <a href="#">InterPro</a> |
| C445_03238                              | <a href="#">EMA36412</a> | signal-transducing histidine kinase [Halob... | <a href="#">CDD</a> | <a href="#">UniProt</a> | <a href="#">Pfam</a> | <a href="#">InterPro</a> |
| C445_03768                              | <a href="#">EMA35943</a> | signal-transducing histidine kinase [Halob... | <a href="#">CDD</a> | <a href="#">UniProt</a> | <a href="#">Pfam</a> | <a href="#">InterPro</a> |
| C445_04353                              | <a href="#">EMA36058</a> | PAS/PAC sensor signal transduction histidi... | <a href="#">CDD</a> | <a href="#">UniProt</a> | <a href="#">Pfam</a> | <a href="#">InterPro</a> |
| C445_04493                              | <a href="#">EMA36086</a> | multi-sensor signal transduction histidine... | <a href="#">CDD</a> | <a href="#">UniProt</a> | <a href="#">Pfam</a> | <a href="#">InterPro</a> |
| C445_04793                              | <a href="#">EMA36146</a> | chemotaxis protein CheA [Halobiforma lacis... | <a href="#">CDD</a> | <a href="#">UniProt</a> | <a href="#">Pfam</a> | <a href="#">InterPro</a> |
| C445_05838                              | <a href="#">EMA35216</a> | 11-domain light and oxygen sensing his kin... | <a href="#">CDD</a> | <a href="#">UniProt</a> | <a href="#">Pfam</a> | <a href="#">InterPro</a> |
| C445_05878                              | <a href="#">EMA35224</a> | signal-transducing histidine kinase [Halob... | <a href="#">CDD</a> | <a href="#">UniProt</a> | <a href="#">Pfam</a> | <a href="#">InterPro</a> |
| C445_06568                              | <a href="#">EMA34890</a> | GAF sensor signal transduction histidine k... | <a href="#">CDD</a> | <a href="#">UniProt</a> | <a href="#">Pfam</a> | <a href="#">InterPro</a> |
| C445_06900                              | <a href="#">EMA34630</a> | multi-sensor signal transduction histidine... | <a href="#">CDD</a> | <a href="#">UniProt</a> | <a href="#">Pfam</a> | <a href="#">InterPro</a> |
| C445_08994                              | <a href="#">EMA33813</a> | GAF sensor signal transduction histidine k... | <a href="#">CDD</a> | <a href="#">UniProt</a> | <a href="#">Pfam</a> | <a href="#">InterPro</a> |
| C445_10797                              | <a href="#">EMA32599</a> | multi-sensor signal transduction histidine... | <a href="#">CDD</a> | <a href="#">UniProt</a> | <a href="#">Pfam</a> | <a href="#">InterPro</a> |
| C445_12901                              | <a href="#">EMA32213</a> | multi-sensor signal transduction histidine... | <a href="#">CDD</a> | <a href="#">UniProt</a> | <a href="#">Pfam</a> | <a href="#">InterPro</a> |
| C445_13570                              | <a href="#">EMA31847</a> | signal-transducing histidine kinase [Halob... | <a href="#">CDD</a> | <a href="#">UniProt</a> | <a href="#">Pfam</a> | <a href="#">InterPro</a> |
| C445_14287                              | <a href="#">EMA31658</a> | multi-sensor signal transduction histidine... | <a href="#">CDD</a> | <a href="#">UniProt</a> | <a href="#">Pfam</a> | <a href="#">InterPro</a> |
| C445_14317                              | <a href="#">EMA31664</a> | multi-sensor signal transduction histidine... | <a href="#">CDD</a> | <a href="#">UniProt</a> | <a href="#">Pfam</a> | <a href="#">InterPro</a> |
| C445_14874                              | <a href="#">EMA31200</a> | PAS sensor protein [Halobiforma lacisalsi ... | <a href="#">CDD</a> | <a href="#">UniProt</a> | <a href="#">Pfam</a> | <a href="#">InterPro</a> |
| C445_16569                              | <a href="#">EMA30442</a> | histidine kinase, partial [Halobiforma lac... | <a href="#">CDD</a> | <a href="#">UniProt</a> | <a href="#">Pfam</a> | <a href="#">InterPro</a> |
| C445_16579                              | <a href="#">EMA30177</a> | PAS sensor protein [Halobiforma lacisalsi ... | <a href="#">CDD</a> | <a href="#">UniProt</a> | <a href="#">Pfam</a> | <a href="#">InterPro</a> |
| C445_18181                              | <a href="#">EMA28579</a> | PAS/PAC sensor signal transduction histidi... | <a href="#">CDD</a> | <a href="#">UniProt</a> | <a href="#">Pfam</a> | <a href="#">InterPro</a> |
| C445_20027                              | <a href="#">EMA27973</a> | PAS/PAC sensor signal transduction histidi... | <a href="#">CDD</a> | <a href="#">UniProt</a> | <a href="#">Pfam</a> | <a href="#">InterPro</a> |
| C445_20052                              | <a href="#">EMA27978</a> | PAS/PAC sensor signal transduction histidi... | <a href="#">CDD</a> | <a href="#">UniProt</a> | <a href="#">Pfam</a> | <a href="#">InterPro</a> |
| <b>REC only</b>                         |                          |                                               |                     |                         |                      |                          |
| C445_00470                              | <a href="#">EMA37875</a> | response regulator receiver protein [Halob... | <a href="#">CDD</a> | <a href="#">UniProt</a> | <a href="#">Pfam</a> | <a href="#">InterPro</a> |
| C445_02181                              | <a href="#">EMA37012</a> | response regulator receiver protein [Halob... | <a href="#">CDD</a> | <a href="#">UniProt</a> | <a href="#">Pfam</a> | <a href="#">InterPro</a> |

|                 |                          |                                               |     |                         |                      |                          |
|-----------------|--------------------------|-----------------------------------------------|-----|-------------------------|----------------------|--------------------------|
| C445_04498      | <a href="#">EMA36087</a> | response regulator receiver protein [Halob... | CDD | <a href="#">UniProt</a> | <a href="#">Pfam</a> | <a href="#">InterPro</a> |
| C445_04818      | <a href="#">EMA35526</a> | response regulator receiver protein [Halob... | CDD | <a href="#">UniProt</a> | <a href="#">Pfam</a> | <a href="#">InterPro</a> |
| C445_12896      | <a href="#">EMA32212</a> | response regulator receiver protein [Halob... | CDD | <a href="#">UniProt</a> | <a href="#">Pfam</a> | <a href="#">InterPro</a> |
| C445_14202      | <a href="#">EMA31641</a> | response regulator receiver protein [Halob... | CDD | <a href="#">UniProt</a> | <a href="#">Pfam</a> | <a href="#">InterPro</a> |
| C445_14322      | <a href="#">EMA31665</a> | response regulator receiver protein [Halob... | CDD | <a href="#">UniProt</a> | <a href="#">Pfam</a> | <a href="#">InterPro</a> |
| C445_20037      | <a href="#">EMA27975</a> | response regulator receiver protein [Halob... | CDD | <a href="#">UniProt</a> | <a href="#">Pfam</a> | <a href="#">InterPro</a> |
| <b>REC-HisK</b> |                          |                                               |     |                         |                      |                          |
| C445_03228      | <a href="#">EMA36410</a> | multi-sensor signal transduction histidine... | CDD | <a href="#">UniProt</a> | <a href="#">Pfam</a> | <a href="#">InterPro</a> |
| C445_04538      | <a href="#">EMA36095</a> | putative signal-transducing histidine kina... | CDD | <a href="#">UniProt</a> | <a href="#">Pfam</a> | <a href="#">InterPro</a> |
| C445_09720      | <a href="#">EMA33056</a> | HTR-like protein [Halobiforma lacisalsi AJ... | CDD | <a href="#">UniProt</a> | <a href="#">Pfam</a> | <a href="#">InterPro</a> |
| C445_12756      | <a href="#">EMA32184</a> | multi-sensor signal transduction histidine... | CDD | <a href="#">UniProt</a> | <a href="#">Pfam</a> | <a href="#">InterPro</a> |
| C445_18196      | <a href="#">EMA28582</a> | signal-transducing histidine kinase [Halob... | CDD | <a href="#">UniProt</a> | <a href="#">Pfam</a> | <a href="#">InterPro</a> |
| C445_20390      | <a href="#">EMA27376</a> | pas domain s-box [Halobiforma lacisalsi AJ... | CDD | <a href="#">UniProt</a> | <a href="#">Pfam</a> | <a href="#">InterPro</a> |
| <b>REC-CheB</b> |                          |                                               |     |                         |                      |                          |
| C445_00480      | <a href="#">EMA37877</a> | chemotaxis-specific methylesterase [Halobi... | CDD | <a href="#">UniProt</a> | <a href="#">Pfam</a> | <a href="#">InterPro</a> |
| C445_04813      | <a href="#">EMA35525</a> | chemotaxis-specific methylesterase [Halobi... | CDD | <a href="#">UniProt</a> | <a href="#">Pfam</a> | <a href="#">InterPro</a> |
| <b>REC-HalX</b> |                          |                                               |     |                         |                      |                          |
| C445_04553      | <a href="#">EMA36098</a> | response regulator receiver protein [Halob... | CDD | <a href="#">UniProt</a> | <a href="#">Pfam</a> | <a href="#">InterPro</a> |
| C445_14869      | <a href="#">EMA31199</a> | response regulator receiver protein [Halob... | CDD | <a href="#">UniProt</a> | <a href="#">Pfam</a> | <a href="#">InterPro</a> |
| <b>BAT</b>      |                          |                                               |     |                         |                      |                          |
| C445_00941      | <a href="#">EMA37411</a> | PAS/PAC sensor protein [Halobiforma lacisa... | CDD | <a href="#">UniProt</a> | <a href="#">Pfam</a> | <a href="#">InterPro</a> |
| C445_06400      | <a href="#">EMA35105</a> | response regulator receiver modulated GAF ... | CDD | <a href="#">UniProt</a> | <a href="#">Pfam</a> | <a href="#">InterPro</a> |
| C445_12891      | <a href="#">EMA32211</a> | response regulator receiver modulated GAF ... | CDD | <a href="#">UniProt</a> | <a href="#">Pfam</a> | <a href="#">InterPro</a> |
| C445_16011      | <a href="#">EMA30827</a> | PAS/PAC sensor protein [Halobiforma lacisa... | CDD | <a href="#">UniProt</a> | <a href="#">Pfam</a> | <a href="#">InterPro</a> |

### Halodesulfurarchaeum formicum

#### **HisK, no REC**

|           |                          |                                               |     |                         |                      |                          |
|-----------|--------------------------|-----------------------------------------------|-----|-------------------------|----------------------|--------------------------|
| HTSR_0110 | <a href="#">AOW79319</a> | PAS/PAC sensor signal transduction histidi... | CDD | <a href="#">UniProt</a> | <a href="#">Pfam</a> | <a href="#">InterPro</a> |
| HTSR_0391 | <a href="#">AOW79591</a> | signal-transducing histidine kinase [Halod... | CDD | <a href="#">UniProt</a> | <a href="#">Pfam</a> | <a href="#">InterPro</a> |
| HTSR_0452 | <a href="#">AOW79652</a> | PAS/PAC sensor signal transduction histidi... | CDD | <a href="#">UniProt</a> | <a href="#">Pfam</a> | <a href="#">InterPro</a> |
| HTSR_0469 | <a href="#">AOW79668</a> | signal transduction histidine kinase [Halo... | CDD | <a href="#">UniProt</a> | <a href="#">Pfam</a> | <a href="#">InterPro</a> |
| HTSR_0473 | <a href="#">AOW79672</a> | signal-transducing histidine kinase [Halod... | CDD | <a href="#">UniProt</a> | <a href="#">Pfam</a> | <a href="#">InterPro</a> |
| HTSR_0485 | <a href="#">AOW79682</a> | multi-sensor signal transduction histidine... | CDD | <a href="#">UniProt</a> | <a href="#">Pfam</a> | <a href="#">InterPro</a> |
| HTSR_0621 | <a href="#">AOW79814</a> | integral membrane sensor signal transducti... | CDD | <a href="#">UniProt</a> | <a href="#">Pfam</a> | <a href="#">InterPro</a> |
| HTSR_0688 | <a href="#">AOW79880</a> | signal-transducing histidine kinase [Halod... | CDD | <a href="#">UniProt</a> | <a href="#">Pfam</a> | <a href="#">InterPro</a> |
| HTSR_0987 | <a href="#">AOW80171</a> | signal transduction histidine kinase [Halo... | CDD | <a href="#">UniProt</a> | <a href="#">Pfam</a> | <a href="#">InterPro</a> |
| HTSR_1224 | <a href="#">AOW80402</a> | PAS domain-containing sensor histidine kin... | CDD | <a href="#">UniProt</a> | <a href="#">Pfam</a> | <a href="#">InterPro</a> |
| HTSR_1520 | <a href="#">AOW80694</a> | two-component sensor histidine kinase [Hal... | CDD | <a href="#">UniProt</a> | <a href="#">Pfam</a> | <a href="#">InterPro</a> |
| HTSR_1655 | <a href="#">AOW80825</a> | PAS domain-containing sensor histidine kin... | CDD | <a href="#">UniProt</a> | <a href="#">Pfam</a> | <a href="#">InterPro</a> |
| HTSR_1685 | <a href="#">AOW80855</a> | PAS sensor histidine kinase [Halodesulfura... | CDD | <a href="#">UniProt</a> | <a href="#">Pfam</a> | <a href="#">InterPro</a> |
| HTSR_1904 | <a href="#">AOW81068</a> | histidine kinase [Halodesulfurarchaeum for... | CDD | <a href="#">UniProt</a> | <a href="#">Pfam</a> | <a href="#">InterPro</a> |
| HTSR_2060 | <a href="#">AOW81220</a> | two-component sensor histidine kinase [Hal... | CDD | <a href="#">UniProt</a> | <a href="#">Pfam</a> | <a href="#">InterPro</a> |

#### **REC only**

|           |                          |                                                |     |                         |                      |                          |
|-----------|--------------------------|------------------------------------------------|-----|-------------------------|----------------------|--------------------------|
| HTSR_1368 | <a href="#">AOW80544</a> | chemotaxis protein CheY [Halodesulfurarchae... | CDD | <a href="#">UniProt</a> | <a href="#">Pfam</a> | <a href="#">InterPro</a> |
|-----------|--------------------------|------------------------------------------------|-----|-------------------------|----------------------|--------------------------|

#### **REC-HisK**

|           |                          |                                                |     |                         |                      |                          |
|-----------|--------------------------|------------------------------------------------|-----|-------------------------|----------------------|--------------------------|
| HTSR_1116 | <a href="#">AOW80296</a> | multi-sensor signal transduction histidine ... | CDD | <a href="#">UniProt</a> | <a href="#">Pfam</a> | <a href="#">InterPro</a> |
| HTSR_1800 | <a href="#">AOW80966</a> | multi-sensor signal transduction histidine ... | CDD | <a href="#">UniProt</a> | <a href="#">Pfam</a> | <a href="#">InterPro</a> |

#### **REC-CheB**

|           |                          |                                                |     |                         |                      |                          |
|-----------|--------------------------|------------------------------------------------|-----|-------------------------|----------------------|--------------------------|
| HTSR_1369 | <a href="#">AOW80545</a> | chemotaxis-specific methylesterase CheB [Ha... | CDD | <a href="#">UniProt</a> | <a href="#">Pfam</a> | <a href="#">InterPro</a> |
|-----------|--------------------------|------------------------------------------------|-----|-------------------------|----------------------|--------------------------|

#### **REC-HalX**

|           |                          |                                                |     |                         |                      |                          |
|-----------|--------------------------|------------------------------------------------|-----|-------------------------|----------------------|--------------------------|
| HTSR_1559 | <a href="#">AOW80732</a> | response regulator receiver protein [Halode... | CDD | <a href="#">UniProt</a> | <a href="#">Pfam</a> | <a href="#">InterPro</a> |
|-----------|--------------------------|------------------------------------------------|-----|-------------------------|----------------------|--------------------------|

#### **BAT**

|           |                          |                                                |     |                         |                      |                          |
|-----------|--------------------------|------------------------------------------------|-----|-------------------------|----------------------|--------------------------|
| HTSR_0470 | <a href="#">AOW79669</a> | PAS sensor histidine kinase [Halodesulfurar... | CDD | <a href="#">UniProt</a> | <a href="#">Pfam</a> | <a href="#">InterPro</a> |
|-----------|--------------------------|------------------------------------------------|-----|-------------------------|----------------------|--------------------------|

### Haloferax gibbonsii ATCC 33959

#### **HisK, no REC**

|             |                          |                                              |     |                         |                      |                          |
|-------------|--------------------------|----------------------------------------------|-----|-------------------------|----------------------|--------------------------|
| ABY42_00525 | <a href="#">AKU06301</a> | HTR-like protein [Haloferax gibbonsii] ...   | CDD | <a href="#">UniProt</a> | <a href="#">Pfam</a> | <a href="#">InterPro</a> |
| ABY42_00840 | <a href="#">AKU06356</a> | HTR-like protein [Haloferax gibbonsii] ...   | CDD | <a href="#">UniProt</a> | <a href="#">Pfam</a> | <a href="#">InterPro</a> |
| ABY42_00970 | <a href="#">AKU06382</a> | histidine kinase [Haloferax gibbonsii] ...   | CDD | <a href="#">UniProt</a> | <a href="#">Pfam</a> | <a href="#">InterPro</a> |
| ABY42_02650 | <a href="#">AKU06692</a> | histidine kinase [Haloferax gibbonsii] ...   | CDD | <a href="#">UniProt</a> | <a href="#">Pfam</a> | <a href="#">InterPro</a> |
| ABY42_02935 | <a href="#">AKU06745</a> | histidine kinase [Haloferax gibbonsii] ...   | CDD | <a href="#">UniProt</a> | <a href="#">Pfam</a> | <a href="#">InterPro</a> |
| ABY42_03010 | <a href="#">AKU06760</a> | histidine kinase [Haloferax gibbonsii] ...   | CDD | <a href="#">UniProt</a> | <a href="#">Pfam</a> | <a href="#">InterPro</a> |
| ABY42_05880 | <a href="#">AKU07293</a> | histidine kinase [Haloferax gibbonsii] ...   | CDD | <a href="#">UniProt</a> | <a href="#">Pfam</a> | <a href="#">InterPro</a> |
| ABY42_05985 | <a href="#">AKU07312</a> | chemotaxis protein CheA [Haloferax gibbon... | CDD | <a href="#">UniProt</a> | <a href="#">Pfam</a> | <a href="#">InterPro</a> |
| ABY42_06650 | <a href="#">AKU07434</a> | bacterio-opsin activator [Haloferax gibbo... | CDD | <a href="#">UniProt</a> | <a href="#">Pfam</a> | <a href="#">InterPro</a> |
| ABY42_06845 | <a href="#">AKU07471</a> | histidine kinase [Haloferax gibbonsii] ...   | CDD | <a href="#">UniProt</a> | <a href="#">Pfam</a> | <a href="#">InterPro</a> |
| ABY42_06950 | <a href="#">AKU07489</a> | histidine kinase [Haloferax gibbonsii] ...   | CDD | <a href="#">UniProt</a> | <a href="#">Pfam</a> | <a href="#">InterPro</a> |
| ABY42_08095 | <a href="#">AKU07712</a> | histidine kinase [Haloferax gibbonsii] ...   | CDD | <a href="#">UniProt</a> | <a href="#">Pfam</a> | <a href="#">InterPro</a> |
| ABY42_08810 | <a href="#">AKU07839</a> | chemotaxis protein CheY [Haloferax gibbon... | CDD | <a href="#">UniProt</a> | <a href="#">Pfam</a> | <a href="#">InterPro</a> |
| ABY42_08880 | <a href="#">AKU07851</a> | histidine kinase [Haloferax gibbonsii] ...   | CDD | <a href="#">UniProt</a> | <a href="#">Pfam</a> | <a href="#">InterPro</a> |
| ABY42_09550 | <a href="#">AKU07973</a> | histidine kinase [Haloferax gibbonsii] ...   | CDD | <a href="#">UniProt</a> | <a href="#">Pfam</a> | <a href="#">InterPro</a> |
| ABY42_10615 | <a href="#">AKU08166</a> | histidine kinase [Haloferax gibbonsii] ...   | CDD | <a href="#">UniProt</a> | <a href="#">Pfam</a> | <a href="#">InterPro</a> |
| ABY42_11660 | <a href="#">AKU08355</a> | chemotaxis protein CheY [Haloferax gibbon... | CDD | <a href="#">UniProt</a> | <a href="#">Pfam</a> | <a href="#">InterPro</a> |
| ABY42_12560 | <a href="#">AKU08523</a> | transcriptional regulator [Haloferax gibb... | CDD | <a href="#">UniProt</a> | <a href="#">Pfam</a> | <a href="#">InterPro</a> |
| ABY42_14485 | <a href="#">AKU08884</a> | chemotaxis protein [Haloferax gibbonsii] ... | CDD | <a href="#">UniProt</a> | <a href="#">Pfam</a> | <a href="#">InterPro</a> |
| ABY42_06335 | <a href="#">AKU09049</a> | histidine kinase [Haloferax gibbonsii] ...   | CDD | <a href="#">UniProt</a> | <a href="#">Pfam</a> | <a href="#">InterPro</a> |
| ABY42_16170 | <a href="#">AKU09336</a> | histidine kinase (plasmid) [Haloferax gib... | CDD | <a href="#">UniProt</a> | <a href="#">Pfam</a> | <a href="#">InterPro</a> |

|                    |                          |                                              |                     |                         |                      |                                       |
|--------------------|--------------------------|----------------------------------------------|---------------------|-------------------------|----------------------|---------------------------------------|
| ABY42_16475        | <a href="#">AKU09389</a> | hypothetical protein ABY42_16475 (plasmid... | <a href="#">CDD</a> | <a href="#">UniProt</a> | <a href="#">Pfam</a> | <a href="#">InterPro</a>              |
| ABY42_16585        | <a href="#">AKU09408</a> | histidine kinase (plasmid) [Haloferax gib... | <a href="#">CDD</a> | <a href="#">UniProt</a> | <a href="#">Pfam</a> | <a href="#">InterPro</a>              |
| ABY42_16950        | <a href="#">AKU09468</a> | histidine kinase (plasmid) [Haloferax gib... | <a href="#">CDD</a> | <a href="#">UniProt</a> | <a href="#">Pfam</a> | <a href="#">InterPro</a>              |
| ABY42_16975        | <a href="#">AKU09473</a> | HTR-like protein (plasmid) [Haloferax gib... | <a href="#">CDD</a> | <a href="#">UniProt</a> | <a href="#">Pfam</a> | <a href="#">InterPro</a>              |
| ABY42_18000        | <a href="#">AKU09698</a> | histidine kinase (plasmid) [Haloferax gib... | <a href="#">CDD</a> | <a href="#">UniProt</a> | <a href="#">Pfam</a> | <a href="#">InterPro</a>              |
| ABY42_18255        | <a href="#">AKU09807</a> | HTR-like protein (plasmid) [Haloferax gib... | <a href="#">CDD</a> | <a href="#">UniProt</a> | <a href="#">Pfam</a> | <a href="#">InterPro</a>              |
| <b>REC only</b>    |                          |                                              |                     |                         |                      |                                       |
| ABY42_05905        | <a href="#">AKU07298</a> | regulator [Haloferax gibbonsii] .....        | <a href="#">CDD</a> | <a href="#">UniProt</a> | <a href="#">Pfam</a> | <a href="#">InterPro</a>              |
| ABY42_06660        | <a href="#">AKU07436</a> | response regulator [Haloferax gibbonsii] ... | <a href="#">CDD</a> | <a href="#">UniProt</a> | <a href="#">Pfam</a> | <a href="#">InterPro</a>              |
| ABY42_09885        | <a href="#">AKU08035</a> | histidine kinase [Haloferax gibbonsii] ..... | <a href="#">CDD</a> | <a href="#">UniProt</a> | <a href="#">Pfam</a> | <a href="#">InterPro</a>              |
| <b>REC-HisK</b>    |                          |                                              |                     |                         |                      |                                       |
| ABY42_01350        | <a href="#">AKU06453</a> | histidine kinase [Haloferax gibbonsii] ..... | <a href="#">CDD</a> | <a href="#">UniProt</a> | <a href="#">Pfam</a> | <a href="#">InterPro</a>              |
| ABY42_02495        | <a href="#">AKU06663</a> | histidine kinase [Haloferax gibbonsii] ..... | <a href="#">CDD</a> | <a href="#">UniProt</a> | <a href="#">Pfam</a> | <a href="#">InterPro</a>              |
| ABY42_07090        | <a href="#">AKU07514</a> | chemotaxis protein CheY [Haloferax gibbon... | <a href="#">CDD</a> | <a href="#">UniProt</a> | <a href="#">Pfam</a> | <a href="#">InterPro</a>              |
| ABY42_08375        | <a href="#">AKU07764</a> | chemotaxis protein CheY [Haloferax gibbon... | <a href="#">CDD</a> | <a href="#">UniProt</a> | <a href="#">Pfam</a> | <a href="#">InterPro</a>              |
| ABY42_10725        | <a href="#">AKU08181</a> | HTR-like protein [Haloferax gibbonsii].....  | <a href="#">CDD</a> | <a href="#">UniProt</a> | <a href="#">Pfam</a> | <a href="#">InterPro</a>              |
| ABY42_10995        | <a href="#">AKU08230</a> | histidine kinase [Haloferax gibbonsii] ...   | <a href="#">CDD</a> | <a href="#">UniProt</a> | <a href="#">Pfam</a> | <a href="#">InterPro</a>              |
| ABY42_13320        | <a href="#">AKU08667</a> | histidine kinase [Haloferax gibbonsii].....  | <a href="#">CDD</a> | <a href="#">UniProt</a> | <a href="#">Pfam</a> | <a href="#">InterPro</a>              |
| ABY42_16180        | <a href="#">AKU09338</a> | HTR-like protein (plasmid) [Haloferax gib... | <a href="#">CDD</a> | <a href="#">UniProt</a> | <a href="#">Pfam</a> | <a href="#">InterPro</a>              |
| ABY42_17520        | <a href="#">AKU09606</a> | PAS sensor protein (plasmid) [Haloferax g... | <a href="#">CDD</a> | <a href="#">UniProt</a> | <a href="#">Pfam</a> | <a href="#">InterPro</a>              |
| ABY42_17580        | <a href="#">AKU09618</a> | histidine kinase (plasmid) [Haloferax gib... | <a href="#">CDD</a> | <a href="#">UniProt</a> | <a href="#">Pfam</a> | <a href="#">InterPro</a>              |
| <b>REC-CheB</b>    |                          |                                              |                     |                         |                      |                                       |
| ABY42_05990        | <a href="#">AKU09043</a> | chemotaxis protein [Haloferax gibbonsii] ... | <a href="#">CDD</a> | <a href="#">UniProt</a> | <a href="#">Pfam</a> | <a href="#">InterPro</a>              |
| <b>REC-PAS\GAF</b> |                          |                                              |                     |                         |                      |                                       |
| ABY42_10740        | <a href="#">AKU08183</a> | HTR-like protein [Haloferax gibbonsii].....  | <a href="#">CDD</a> | <a href="#">UniProt</a> | <a href="#">Pfam</a> | <a href="#">InterPro</a>              |
| ABY42_11995        | <a href="#">AKU08419</a> | diguanylate cyclase [Haloferax gibbonsii]... | <a href="#">CDD</a> | <a href="#">UniProt</a> | <a href="#">Pfam</a> | <a href="#">InterPro</a>              |
| ABY42_17740        | <a href="#">AKU09648</a> | HTR-like protein (plasmid) [Haloferax gib... | <a href="#">CDD</a> | <a href="#">UniProt</a> | <a href="#">Pfam</a> | <a href="#">InterPro</a>              |
| <b>REC-HalX</b>    |                          |                                              |                     |                         |                      |                                       |
| ABY42_06210        | <a href="#">AKU07352</a> | DNA-binding protein [Haloferax gibbonsii]... | <a href="#">CDD</a> | <a href="#">UniProt</a> | <a href="#">Pfam</a> | <a href="#">InterPro</a>              |
| ABY42_14490        | <a href="#">AKU08885</a> | transcriptional regulator [Haloferax gibb... | <a href="#">CDD</a> | <a href="#">UniProt</a> | <a href="#">Pfam</a> | <a href="#">InterPro</a>              |
| <b>BAT</b>         |                          |                                              |                     |                         |                      |                                       |
| ABY42_06655        | <a href="#">AKU07435</a> | chemotaxis protein CheY [Haloferax gibbon... | <a href="#">CDD</a> | <a href="#">UniProt</a> | <a href="#">Pfam</a> | <a href="#">InterPro</a>              |
| ABY42_09520        | <a href="#">AKU09080</a> | bacterio-opsin activator [Haloferax gibbo... | <a href="#">CDD</a> | <a href="#">UniProt</a> | <a href="#">Pfam</a> | <a href="#">InterPro</a>              |
| ABY42_16590        | <a href="#">AKU09409</a> | bacterio-opsin activator (plasmid) [Halof... | <a href="#">CDD</a> | <a href="#">UniProt</a> | <a href="#">Pfam</a> | <a href="#">InterPro</a>              |
| ABY42_16945        | <a href="#">AKU09467</a> | PAS/PAC sensor protein (plasmid) [Halofer... | <a href="#">CDD</a> | <a href="#">UniProt</a> | <a href="#">Pfam</a> | <a href="#">InterPro</a>              |
| <b>REC-HalOD1</b>  |                          |                                              |                     |                         |                      |                                       |
| ABY42_11475        | <a href="#">AKU08318</a> | chemotaxis protein CheY [Haloferax gibbon... | <a href="#">CDD</a> | <a href="#">UniProt</a> | <a href="#">Pfam</a> | <a href="#">InterPro</a> (REC-HalOD1) |

### Haloferax mediterranei ATCC 33500

#### **HisK, no REC**

|                    |                          |                                               |                     |                         |                      |                          |
|--------------------|--------------------------|-----------------------------------------------|---------------------|-------------------------|----------------------|--------------------------|
| HFX_0175           | <a href="#">AFK17916</a> | HTR-like protein [Haloferax mediterranei A... | <a href="#">CDD</a> | <a href="#">UniProt</a> | <a href="#">Pfam</a> | <a href="#">InterPro</a> |
| HFX_0206           | <a href="#">AFK17947</a> | PAS domain S-box [Haloferax mediterranei A... | <a href="#">CDD</a> | <a href="#">UniProt</a> | <a href="#">Pfam</a> | <a href="#">InterPro</a> |
| HFX_0587           | <a href="#">AFK18312</a> | putative signal-transducing histidine kina... | <a href="#">CDD</a> | <a href="#">UniProt</a> | <a href="#">Pfam</a> | <a href="#">InterPro</a> |
| HFX_1133           | <a href="#">AFK18849</a> | HTR-like protein [Haloferax mediterranei A... | <a href="#">CDD</a> | <a href="#">UniProt</a> | <a href="#">Pfam</a> | <a href="#">InterPro</a> |
| HFX_1211           | <a href="#">AFK18924</a> | PAS domain S-box [Haloferax mediterranei A... | <a href="#">CDD</a> | <a href="#">UniProt</a> | <a href="#">Pfam</a> | <a href="#">InterPro</a> |
| HFX_1232           | <a href="#">AFK18945</a> | taxis sensor histidine kinase cheA / two-c... | <a href="#">CDD</a> | <a href="#">UniProt</a> | <a href="#">Pfam</a> | <a href="#">InterPro</a> |
| HFX_1346           | <a href="#">AFK19057</a> | putative redox sensing protein [Haloferax ... | <a href="#">CDD</a> | <a href="#">UniProt</a> | <a href="#">Pfam</a> | <a href="#">InterPro</a> |
| HFX_1436           | <a href="#">AFK19145</a> | PAS domain S-box [Haloferax mediterranei A... | <a href="#">CDD</a> | <a href="#">UniProt</a> | <a href="#">Pfam</a> | <a href="#">InterPro</a> |
| HFX_1472           | <a href="#">AFK19180</a> | putative signal-transducing histidine kina... | <a href="#">CDD</a> | <a href="#">UniProt</a> | <a href="#">Pfam</a> | <a href="#">InterPro</a> |
| HFX_1751           | <a href="#">AFK19457</a> | PAS domain S-box [Haloferax mediterranei A... | <a href="#">CDD</a> | <a href="#">UniProt</a> | <a href="#">Pfam</a> | <a href="#">InterPro</a> |
| HFX_1895           | <a href="#">AFK19592</a> | HTR-like protein [Haloferax mediterranei A... | <a href="#">CDD</a> | <a href="#">UniProt</a> | <a href="#">Pfam</a> | <a href="#">InterPro</a> |
| HFX_2153           | <a href="#">AFK19842</a> | oxygen and light sensing his kinase [Halof... | <a href="#">CDD</a> | <a href="#">UniProt</a> | <a href="#">Pfam</a> | <a href="#">InterPro</a> |
| HFX_2348           | <a href="#">AFK20035</a> | HTR-like protein [Haloferax mediterranei A... | <a href="#">CDD</a> | <a href="#">UniProt</a> | <a href="#">Pfam</a> | <a href="#">InterPro</a> |
| HFX_2522           | <a href="#">AFK20204</a> | putative light- and oxygen-sensing transcr... | <a href="#">CDD</a> | <a href="#">UniProt</a> | <a href="#">Pfam</a> | <a href="#">InterPro</a> |
| HFX_5121           | <a href="#">AFK20956</a> | histidine kinase (plasmid) [Haloferax medi... | <a href="#">CDD</a> | <a href="#">UniProt</a> | <a href="#">Pfam</a> | <a href="#">InterPro</a> |
| HFX_5211           | <a href="#">AFK21044</a> | signal transduction histidine kinase / two... | <a href="#">CDD</a> | <a href="#">UniProt</a> | <a href="#">Pfam</a> | <a href="#">InterPro</a> |
| HFX_6029           | <a href="#">AFK21156</a> | PAS domain S-box (plasmid) [Haloferax medi... | <a href="#">CDD</a> | <a href="#">UniProt</a> | <a href="#">Pfam</a> | <a href="#">InterPro</a> |
| HFX_6124           | <a href="#">AFK21249</a> | multi-sensor signal transduction histidine... | <a href="#">CDD</a> | <a href="#">UniProt</a> | <a href="#">Pfam</a> | <a href="#">InterPro</a> |
| HFX_6198           | <a href="#">AFK21321</a> | light and oxygen sensing histidine kinase ... | <a href="#">CDD</a> | <a href="#">UniProt</a> | <a href="#">Pfam</a> | <a href="#">InterPro</a> |
| HFX_6272           | <a href="#">AFK21395</a> | signal-transducing histidine kinase-like p... | <a href="#">CDD</a> | <a href="#">UniProt</a> | <a href="#">Pfam</a> | <a href="#">InterPro</a> |
| HFX_0600           | <a href="#">AFK18325</a> | putative PAS/PAC sensing his kinase [Halof... | <a href="#">CDD</a> | <a href="#">UniProt</a> | <a href="#">Pfam</a> | <a href="#">InterPro</a> |
| HFX_1909           | <a href="#">AFK19606</a> | putative signal-transducing histidine kina... | <a href="#">CDD</a> | <a href="#">UniProt</a> | <a href="#">Pfam</a> | <a href="#">InterPro</a> |
| HFX_2053           | <a href="#">AFK19745</a> | histidine kinase [Haloferax mediterranei A... | <a href="#">CDD</a> | <a href="#">UniProt</a> | <a href="#">Pfam</a> | <a href="#">InterPro</a> |
| <b>REC only</b>    |                          |                                               |                     |                         |                      |                          |
| HFX_1216           | <a href="#">AFK18929</a> | response regulator cheY [Haloferax mediter... | <a href="#">CDD</a> | <a href="#">UniProt</a> | <a href="#">Pfam</a> | <a href="#">InterPro</a> |
| HFX_1438           | <a href="#">AFK19147</a> | response regulator / transcription regulat... | <a href="#">CDD</a> | <a href="#">UniProt</a> | <a href="#">Pfam</a> | <a href="#">InterPro</a> |
| HFX_2988           | <a href="#">AFK20652</a> | response regulator receiver [Haloferax med... | <a href="#">CDD</a> | <a href="#">UniProt</a> | <a href="#">Pfam</a> | <a href="#">InterPro</a> |
| <b>REC-HisK</b>    |                          |                                               |                     |                         |                      |                          |
| HFX_1367           | <a href="#">AFK19077</a> | HTR-like protein [Haloferax mediterranei A... | <a href="#">CDD</a> | <a href="#">UniProt</a> | <a href="#">Pfam</a> | <a href="#">InterPro</a> |
| HFX_1521           | <a href="#">AFK19228</a> | adaptive-response sensory-kinase [Halofera... | <a href="#">CDD</a> | <a href="#">UniProt</a> | <a href="#">Pfam</a> | <a href="#">InterPro</a> |
| HFX_1557           | <a href="#">AFK19264</a> | light and oxygen sensing histidine kinase ... | <a href="#">CDD</a> | <a href="#">UniProt</a> | <a href="#">Pfam</a> | <a href="#">InterPro</a> |
| HFX_1805           | <a href="#">AFK19509</a> | PAS domain S-box [Haloferax mediterranei A... | <a href="#">CDD</a> | <a href="#">UniProt</a> | <a href="#">Pfam</a> | <a href="#">InterPro</a> |
| <b>REC-CheB</b>    |                          |                                               |                     |                         |                      |                          |
| HFX_1233           | <a href="#">AFK18946</a> | chemotaxis response regulator containing a... | <a href="#">CDD</a> | <a href="#">UniProt</a> | <a href="#">Pfam</a> | <a href="#">InterPro</a> |
| <b>REC-PAS\GAF</b> |                          |                                               |                     |                         |                      |                          |
| HFX_0350           | <a href="#">AFK18086</a> | HTR-like protein [Haloferax mediterranei A... | <a href="#">CDD</a> | <a href="#">UniProt</a> | <a href="#">Pfam</a> | <a href="#">InterPro</a> |
| HFX_2989           | <a href="#">AFK20653</a> | response regulator with CheY-like receiver... | <a href="#">CDD</a> | <a href="#">UniProt</a> | <a href="#">Pfam</a> | <a href="#">InterPro</a> |
| HFX_6428           | <a href="#">AFK21547</a> | response regulator with CheY-like receiver... | <a href="#">CDD</a> | <a href="#">UniProt</a> | <a href="#">Pfam</a> | <a href="#">InterPro</a> |

|                   |                          |                                               |                     |                         |                      |                          |              |
|-------------------|--------------------------|-----------------------------------------------|---------------------|-------------------------|----------------------|--------------------------|--------------|
| <b>REC-HalX</b>   |                          |                                               |                     |                         |                      |                          |              |
| HFX_1279          | <a href="#">AFK18992</a> | HoxA-like transcriptional regulator [Halof... | <a href="#">CDD</a> | <a href="#">UniProt</a> | <a href="#">Pfam</a> | <a href="#">InterPro</a> |              |
| <b>BAT</b>        |                          |                                               |                     |                         |                      |                          |              |
| HFX_1437          | <a href="#">AFK19146</a> | bacterio-opsin activator [Haloferax medite... | <a href="#">CDD</a> | <a href="#">UniProt</a> | <a href="#">Pfam</a> | <a href="#">InterPro</a> |              |
| HFX_2047          | <a href="#">AFK19739</a> | bacterio-opsin activator-like protein [Hal... | <a href="#">CDD</a> | <a href="#">UniProt</a> | <a href="#">Pfam</a> | <a href="#">InterPro</a> |              |
| HFX_2176          | <a href="#">AFK19865</a> | bacterio-opsin activator-like protein [Hal... | <a href="#">CDD</a> | <a href="#">UniProt</a> | <a href="#">Pfam</a> | <a href="#">InterPro</a> |              |
| HFX_5179          | <a href="#">AFK21013</a> | putative DNA binding protein (plasmid) [Ha... | <a href="#">CDD</a> | <a href="#">UniProt</a> | <a href="#">Pfam</a> | <a href="#">InterPro</a> |              |
| <b>REC-HalOD1</b> |                          |                                               |                     |                         |                      |                          |              |
| HFX_2316          | <a href="#">AFK20003</a> | HTR-like protein [Haloferax mediterranei A... | <a href="#">CDD</a> | <a href="#">UniProt</a> | <a href="#">Pfam</a> | <a href="#">InterPro</a> | (REC-HalOD1) |

### Haloferax volcanii DS2

|                     |                          |                                                  |                     |                         |                      |                          |              |
|---------------------|--------------------------|--------------------------------------------------|---------------------|-------------------------|----------------------|--------------------------|--------------|
| <b>HisK, no REC</b> |                          |                                                  |                     |                         |                      |                          |              |
| HVO_0110            | <a href="#">ADE02962</a> | sensor box histidine kinase [Haloferax vol...    | <a href="#">CDD</a> | <a href="#">UniProt</a> | <a href="#">Pfam</a> | <a href="#">InterPro</a> |              |
| HVO_0632            | <a href="#">ADE03168</a> | sensor box histidine kinase [Haloferax vol...    | <a href="#">CDD</a> | <a href="#">UniProt</a> | <a href="#">Pfam</a> | <a href="#">InterPro</a> |              |
| HVO_1201            | <a href="#">ADE04627</a> | sensor box histidine kinase [Haloferax vol...    | <a href="#">CDD</a> | <a href="#">UniProt</a> | <a href="#">Pfam</a> | <a href="#">InterPro</a> |              |
| HVO_1223            | <a href="#">ADE04296</a> | taxis sensor histidine kinase CheA [Halofe...    | <a href="#">CDD</a> | <a href="#">UniProt</a> | <a href="#">Pfam</a> | <a href="#">InterPro</a> |              |
| HVO_1298            | <a href="#">ADE05096</a> | sensor box histidine kinase [Haloferax vol...    | <a href="#">CDD</a> | <a href="#">UniProt</a> | <a href="#">Pfam</a> | <a href="#">InterPro</a> |              |
| HVO_1356            | <a href="#">ADE05126</a> | sensor box histidine kinase [Haloferax vol...    | <a href="#">CDD</a> | <a href="#">UniProt</a> | <a href="#">Pfam</a> | <a href="#">InterPro</a> |              |
| HVO_1397            | <a href="#">ADE03313</a> | histidine kinase [Haloferax volcanii DS2] ...    | <a href="#">CDD</a> | <a href="#">UniProt</a> | <a href="#">Pfam</a> | <a href="#">InterPro</a> |              |
| HVO_1414            | <a href="#">ADE03864</a> | sensor box histidine kinase [Haloferax vol...    | <a href="#">CDD</a> | <a href="#">UniProt</a> | <a href="#">Pfam</a> | <a href="#">InterPro</a> |              |
| HVO_1811            | <a href="#">ADE03851</a> | sensor box histidine kinase [Haloferax vol...    | <a href="#">CDD</a> | <a href="#">UniProt</a> | <a href="#">Pfam</a> | <a href="#">InterPro</a> |              |
| HVO_2339            | <a href="#">ADE02601</a> | sensor box histidine kinase [Haloferax vol...    | <a href="#">CDD</a> | <a href="#">UniProt</a> | <a href="#">Pfam</a> | <a href="#">InterPro</a> |              |
| HVO_2840            | <a href="#">ADE04018</a> | sensor box histidine kinase [Haloferax vol...    | <a href="#">CDD</a> | <a href="#">UniProt</a> | <a href="#">Pfam</a> | <a href="#">InterPro</a> |              |
| HVO_A0160           | <a href="#">ADE01815</a> | sensor box histidine kinase (plasmid) [Hal...    | <a href="#">CDD</a> | <a href="#">UniProt</a> | <a href="#">Pfam</a> | <a href="#">InterPro</a> |              |
| HVO_B0175           | <a href="#">ADE01614</a> | histidine kinase (plasmid) [Haloferax volc...    | <a href="#">CDD</a> | <a href="#">UniProt</a> | <a href="#">Pfam</a> | <a href="#">InterPro</a> |              |
| HVO_B0196           | <a href="#">ADE01294</a> | histidine kinase (plasmid) [Haloferax volc...    | <a href="#">CDD</a> | <a href="#">UniProt</a> | <a href="#">Pfam</a> | <a href="#">InterPro</a> |              |
| HVO_B0273           | <a href="#">ADE01372</a> | sensor box histidine kinase (plasmid) [Hal...    | <a href="#">CDD</a> | <a href="#">UniProt</a> | <a href="#">Pfam</a> | <a href="#">InterPro</a> |              |
| <b>REC only</b>     |                          |                                                  |                     |                         |                      |                          |              |
| HVO_1207            | <a href="#">ADE02829</a> | response regulator CheY [Haloferax volcani...    | <a href="#">CDD</a> | <a href="#">UniProt</a> | <a href="#">Pfam</a> | <a href="#">InterPro</a> |              |
| HVO_1358            | <a href="#">ADE03521</a> | receiver box response regulator [Haloferax...    | <a href="#">CDD</a> | <a href="#">UniProt</a> | <a href="#">Pfam</a> | <a href="#">InterPro</a> |              |
| HVO_2012            | <a href="#">ADE02718</a> | receiver box response regulator [Haloferax...    | <a href="#">CDD</a> | <a href="#">UniProt</a> | <a href="#">Pfam</a> | <a href="#">InterPro</a> |              |
| HVO_B0153B          | <a href="#">AOP12795</a> | receiver box response regulator (plasmid) ...    | <a href="#">CDD</a> | <a href="#">UniProt</a> | <a href="#">Pfam</a> | <a href="#">InterPro</a> |              |
| <b>REC-HisK</b>     |                          |                                                  |                     |                         |                      |                          |              |
| HVO_0301            | <a href="#">ADE03966</a> | receiver/sensor box histidine kinase [Halo...    | <a href="#">CDD</a> | <a href="#">UniProt</a> | <a href="#">Pfam</a> | <a href="#">InterPro</a> |              |
| HVO_1456            | <a href="#">ADE04984</a> | receiver/sensor box histidine kinase [Halo...    | <a href="#">CDD</a> | <a href="#">UniProt</a> | <a href="#">Pfam</a> | <a href="#">InterPro</a> |              |
| HVO_1713            | <a href="#">ADE04135</a> | receiver/sensor box histidine kinase [Halo...    | <a href="#">CDD</a> | <a href="#">UniProt</a> | <a href="#">Pfam</a> | <a href="#">InterPro</a> |              |
| HVO_2030            | <a href="#">ADE02405</a> | HTR-like protein [Haloferax volcanii DS2] ...    | <a href="#">CDD</a> | <a href="#">UniProt</a> | <a href="#">Pfam</a> | <a href="#">InterPro</a> |              |
| HVO_2660            | <a href="#">ADE03121</a> | receiver/sensor box histidine kinase [Halo...    | <a href="#">CDD</a> | <a href="#">UniProt</a> | <a href="#">Pfam</a> | <a href="#">InterPro</a> |              |
| HVO_A0550           | <a href="#">ADE02147</a> | receiver/sensor box histidine kinase (plas...    | <a href="#">CDD</a> | <a href="#">UniProt</a> | <a href="#">Pfam</a> | <a href="#">InterPro</a> |              |
| HVO_B0143           | <a href="#">ADE01433</a> | receiver/sensor box histidine kinase (plas...    | <a href="#">CDD</a> | <a href="#">UniProt</a> | <a href="#">Pfam</a> | <a href="#">InterPro</a> |              |
| HVO_B0154           | <a href="#">ADE01517</a> | receiver/sensor box histidine kinase (plas...    | <a href="#">CDD</a> | <a href="#">UniProt</a> | <a href="#">Pfam</a> | <a href="#">InterPro</a> |              |
| <b>REC-CheB</b>     |                          |                                                  |                     |                         |                      |                          |              |
| HVO_1224            | <a href="#">ADE03699</a> | protein-glutamate methyltransferase CheB [Hal... | <a href="#">CDD</a> | <a href="#">UniProt</a> | <a href="#">Pfam</a> | <a href="#">InterPro</a> |              |
| <b>REC-PAS\GAF</b>  |                          |                                                  |                     |                         |                      |                          |              |
| HVO_1953            | <a href="#">ADE04799</a> | 11-domain light and oxygen sensing his kin...    | <a href="#">CDD</a> | <a href="#">UniProt</a> | <a href="#">Pfam</a> | <a href="#">InterPro</a> |              |
| HVO_2025            | <a href="#">ADE03702</a> | receiver/sensor box protein [Haloferax vol...    | <a href="#">CDD</a> | <a href="#">UniProt</a> | <a href="#">Pfam</a> | <a href="#">InterPro</a> |              |
| HVO_A0540           | <a href="#">ADE01917</a> | homolog to receiver/sensor box histidine k...    | <a href="#">CDD</a> | <a href="#">UniProt</a> | <a href="#">Pfam</a> | <a href="#">InterPro</a> |              |
| HVO_A0587           | <a href="#">ADE01998</a> | receiver/sensor box protein (plasmid) [Hal...    | <a href="#">CDD</a> | <a href="#">UniProt</a> | <a href="#">Pfam</a> | <a href="#">InterPro</a> |              |
| <b>REC-HalX</b>     |                          |                                                  |                     |                         |                      |                          |              |
| HVO_1271            | <a href="#">ADE05178</a> | receiver box response regulator [Haloferax...    | <a href="#">CDD</a> | <a href="#">UniProt</a> | <a href="#">Pfam</a> | <a href="#">InterPro</a> |              |
| HVO_2838            | <a href="#">ADE04759</a> | receiver box response regulator [Haloferax...    | <a href="#">CDD</a> | <a href="#">UniProt</a> | <a href="#">Pfam</a> | <a href="#">InterPro</a> |              |
| <b>REC-HTH 10</b>   |                          |                                                  |                     |                         |                      |                          |              |
| HVO_B0272           | <a href="#">ADE01630</a> | receiver box HTH-10 family transcription r...    | <a href="#">CDD</a> | <a href="#">UniProt</a> | <a href="#">Pfam</a> | <a href="#">InterPro</a> |              |
| <b>BAT</b>          |                          |                                                  |                     |                         |                      |                          |              |
| HVO_1357            | <a href="#">ADE03360</a> | receiver/bat box HTH-10 family transcripti...    | <a href="#">CDD</a> | <a href="#">UniProt</a> | <a href="#">Pfam</a> | <a href="#">InterPro</a> |              |
| <b>REC-HalOD1</b>   |                          |                                                  |                     |                         |                      |                          |              |
| HVO_2306            | <a href="#">ADE02288</a> | receiver box response regulator [Haloferax...    | <a href="#">CDD</a> | <a href="#">UniProt</a> | <a href="#">Pfam</a> | <a href="#">InterPro</a> | (REC-HalOD1) |

### Halogeometricum borinquense DSM 11551

|                     |                          |                                               |                     |                         |                      |                          |  |
|---------------------|--------------------------|-----------------------------------------------|---------------------|-------------------------|----------------------|--------------------------|--|
| <b>HisK, no REC</b> |                          |                                               |                     |                         |                      |                          |  |
| Hbor_00580          | <a href="#">ADQ65671</a> | PAS domain S-box [Halogeometricum borinque... | <a href="#">CDD</a> | <a href="#">UniProt</a> | <a href="#">Pfam</a> | <a href="#">InterPro</a> |  |
| Hbor_05520          | <a href="#">ADQ66153</a> | PAS domain S-box [Halogeometricum borinque... | <a href="#">CDD</a> | <a href="#">UniProt</a> | <a href="#">Pfam</a> | <a href="#">InterPro</a> |  |
| Hbor_06340          | <a href="#">ADQ66234</a> | PAS domain S-box [Halogeometricum borinque... | <a href="#">CDD</a> | <a href="#">UniProt</a> | <a href="#">Pfam</a> | <a href="#">InterPro</a> |  |
| Hbor_07060          | <a href="#">ADQ66304</a> | signal transduction histidine kinase [Halo... | <a href="#">CDD</a> | <a href="#">UniProt</a> | <a href="#">Pfam</a> | <a href="#">InterPro</a> |  |
| Hbor_08410          | <a href="#">ADQ66437</a> | signal transduction histidine kinase [Halo... | <a href="#">CDD</a> | <a href="#">UniProt</a> | <a href="#">Pfam</a> | <a href="#">InterPro</a> |  |
| Hbor_09050          | <a href="#">ADQ66500</a> | histidine kinase with PAS domain [Halogeom... | <a href="#">CDD</a> | <a href="#">UniProt</a> | <a href="#">Pfam</a> | <a href="#">InterPro</a> |  |
| Hbor_10620          | <a href="#">ADQ66654</a> | PAS domain S-box [Halogeometricum borinque... | <a href="#">CDD</a> | <a href="#">UniProt</a> | <a href="#">Pfam</a> | <a href="#">InterPro</a> |  |
| Hbor_11910          | <a href="#">ADQ66780</a> | PAS domain S-box [Halogeometricum borinque... | <a href="#">CDD</a> | <a href="#">UniProt</a> | <a href="#">Pfam</a> | <a href="#">InterPro</a> |  |
| Hbor_15540          | <a href="#">ADQ67124</a> | PAS domain S-box [Halogeometricum borinque... | <a href="#">CDD</a> | <a href="#">UniProt</a> | <a href="#">Pfam</a> | <a href="#">InterPro</a> |  |
| Hbor_17680          | <a href="#">ADQ67336</a> | PAS domain S-box [Halogeometricum borinque... | <a href="#">CDD</a> | <a href="#">UniProt</a> | <a href="#">Pfam</a> | <a href="#">InterPro</a> |  |
| Hbor_18740          | <a href="#">ADQ67441</a> | PAS domain S-box [Halogeometricum borinque... | <a href="#">CDD</a> | <a href="#">UniProt</a> | <a href="#">Pfam</a> | <a href="#">InterPro</a> |  |
| Hbor_20180          | <a href="#">ADQ67584</a> | chemotaxis protein histidine kinase-like p... | <a href="#">CDD</a> | <a href="#">UniProt</a> | <a href="#">Pfam</a> | <a href="#">InterPro</a> |  |
| Hbor_20420          | <a href="#">ADQ67608</a> | PAS domain S-box [Halogeometricum borinque... | <a href="#">CDD</a> | <a href="#">UniProt</a> | <a href="#">Pfam</a> | <a href="#">InterPro</a> |  |
| Hbor_23440          | <a href="#">ADQ67904</a> | PAS domain S-box [Halogeometricum borinque... | <a href="#">CDD</a> | <a href="#">UniProt</a> | <a href="#">Pfam</a> | <a href="#">InterPro</a> |  |
| Hbor_25510          | <a href="#">ADQ68105</a> | PAS domain S-box [Halogeometricum borinque... | <a href="#">CDD</a> | <a href="#">UniProt</a> | <a href="#">Pfam</a> | <a href="#">InterPro</a> |  |
| Hbor_26640          | <a href="#">ADQ68216</a> | histidine kinase [Halogeometricum borinque... | <a href="#">CDD</a> | <a href="#">UniProt</a> | <a href="#">Pfam</a> | <a href="#">InterPro</a> |  |
| Hbor_30190          | <a href="#">ADQ68556</a> | PAS domain S-box (plasmid) [Halogeometricu... | <a href="#">CDD</a> | <a href="#">UniProt</a> | <a href="#">Pfam</a> | <a href="#">InterPro</a> |  |

|                    |                          |                                               |     |                         |                      |                                          |
|--------------------|--------------------------|-----------------------------------------------|-----|-------------------------|----------------------|------------------------------------------|
| Hbor_31860         | <a href="#">ADQ68721</a> | PAS domain S-box (plasmid) [Halogeometricu... | CDD | <a href="#">UniProt</a> | <a href="#">Pfam</a> | <a href="#">InterPro</a>                 |
| Hbor_32000         | <a href="#">ADQ68735</a> | PAS domain S-box (plasmid) [Halogeometricu... | CDD | <a href="#">UniProt</a> | <a href="#">Pfam</a> | <a href="#">InterPro</a>                 |
| Hbor_32650         | <a href="#">ADQ68796</a> | signal transduction histidine kinase (plas... | CDD | <a href="#">UniProt</a> | <a href="#">Pfam</a> | <a href="#">InterPro</a>                 |
| Hbor_33990         | <a href="#">ADQ68921</a> | PAS domain S-box (plasmid) [Halogeometricu... | CDD | <a href="#">UniProt</a> | <a href="#">Pfam</a> | <a href="#">InterPro</a>                 |
| <b>REC only</b>    |                          |                                               |     |                         |                      |                                          |
| Hbor_18720         | <a href="#">ADQ67439</a> | response regulator with CheY-like receiver... | CDD | <a href="#">UniProt</a> | <a href="#">Pfam</a> | <a href="#">InterPro</a>                 |
| Hbor_20350         | <a href="#">ADQ67601</a> | response regulator containing CheY-like re... | CDD | <a href="#">UniProt</a> | <a href="#">Pfam</a> | <a href="#">InterPro</a>                 |
| Hbor_28770         | <a href="#">ADQ68418</a> | CheY-like receiver domain-containing prote... | CDD | <a href="#">UniProt</a> | <a href="#">Pfam</a> | <a href="#">InterPro</a>                 |
| Hbor_31840         | <a href="#">ADQ68719</a> | response regulator with CheY-like receiver... | CDD | <a href="#">UniProt</a> | <a href="#">Pfam</a> | <a href="#">InterPro</a>                 |
| <b>REC-HisK</b>    |                          |                                               |     |                         |                      |                                          |
| Hbor_00810         | <a href="#">ADQ65694</a> | PAS domain S-box [Halogeometricum borinque... | CDD | <a href="#">UniProt</a> | <a href="#">Pfam</a> | <a href="#">InterPro</a>                 |
| Hbor_10850         | <a href="#">ADQ66675</a> | fused histidine kinase with GAF domain/res... | CDD | <a href="#">UniProt</a> | <a href="#">Pfam</a> | <a href="#">InterPro</a>                 |
| Hbor_14940         | <a href="#">ADQ67068</a> | PAS domain S-box [Halogeometricum borinque... | CDD | <a href="#">UniProt</a> | <a href="#">Pfam</a> | <a href="#">InterPro</a>                 |
| Hbor_26680         | <a href="#">ADQ68220</a> | signal transduction histidine kinase [Halo... | CDD | <a href="#">UniProt</a> | <a href="#">Pfam</a> | <a href="#">InterPro</a>                 |
| Hbor_31450         | <a href="#">ADQ68680</a> | PAS domain S-box (plasmid) [Halogeometricu... | CDD | <a href="#">UniProt</a> | <a href="#">Pfam</a> | <a href="#">InterPro</a>                 |
| Hbor_32190         | <a href="#">ADQ68751</a> | PAS domain S-box (plasmid) [Halogeometricu... | CDD | <a href="#">UniProt</a> | <a href="#">Pfam</a> | <a href="#">InterPro</a>                 |
| Hbor_34840         | <a href="#">ADQ69004</a> | PAS domain S-box (plasmid) [Halogeometricu... | CDD | <a href="#">UniProt</a> | <a href="#">Pfam</a> | <a href="#">InterPro</a>                 |
| Hbor_37050         | <a href="#">ADQ69411</a> | PAS domain S-box (plasmid) [Halogeometricu... | CDD | <a href="#">UniProt</a> | <a href="#">Pfam</a> | <a href="#">InterPro</a>                 |
| <b>REC-CheB</b>    |                          |                                               |     |                         |                      |                                          |
| Hbor_20170         | <a href="#">ADQ67583</a> | chemotaxis response regulator containing a... | CDD | <a href="#">UniProt</a> | <a href="#">Pfam</a> | <a href="#">InterPro</a>                 |
| <b>REC-PAS\GAF</b> |                          |                                               |     |                         |                      |                                          |
| Hbor_28780         | <a href="#">ADQ68419</a> | response regulator with CheY-like receiver... | CDD | <a href="#">UniProt</a> | <a href="#">Pfam</a> | <a href="#">InterPro</a>                 |
| Hbor_32010         | <a href="#">ADQ68736</a> | PAS domain S-box (plasmid) [Halogeometricu... | CDD | <a href="#">UniProt</a> | <a href="#">Pfam</a> | <a href="#">InterPro</a>                 |
| Hbor_32660         | <a href="#">ADQ68797</a> | PAS domain S-box (plasmid) [Halogeometricu... | CDD | <a href="#">UniProt</a> | <a href="#">Pfam</a> | <a href="#">InterPro</a>                 |
| <b>REC-HalX</b>    |                          |                                               |     |                         |                      |                                          |
| Hbor_14340         | <a href="#">ADQ67014</a> | response regulator with CheY-like receiver... | CDD | <a href="#">UniProt</a> | <a href="#">Pfam</a> | <a href="#">InterPro</a>                 |
| Hbor_19590         | <a href="#">ADQ67525</a> | response regulator with CheY-like receiver... | CDD | <a href="#">UniProt</a> | <a href="#">Pfam</a> | <a href="#">InterPro</a>                 |
| Hbor_31650         | <a href="#">ADQ68700</a> | response regulator with CheY-like receiver... | CDD | <a href="#">UniProt</a> | <a href="#">Pfam</a> | <a href="#">InterPro</a>                 |
| <b>HxLR-REC</b>    |                          |                                               |     |                         |                      |                                          |
| Hbor_26690         | <a href="#">ADQ68221</a> | predicted transcriptional regulator [Halog... | CDD | <a href="#">UniProt</a> | <a href="#">Pfam</a> | <a href="#">InterPro</a> (wHTH-REC)      |
| <b>BAT</b>         |                          |                                               |     |                         |                      |                                          |
| Hbor_18730         | <a href="#">ADQ67440</a> | predicted DNA binding protein [Halogeometr... | CDD | <a href="#">UniProt</a> | <a href="#">Pfam</a> | <a href="#">InterPro</a>                 |
| Hbor_32330         | <a href="#">ADQ68765</a> | predicted DNA binding protein (plasmid) [H... | CDD | <a href="#">UniProt</a> | <a href="#">Pfam</a> | <a href="#">InterPro</a>                 |
| Hbor_09190         | <a href="#">ADQ66514</a> | PAS domain S-box [Halogeometricum borinque... | CDD | <a href="#">UniProt</a> | <a href="#">Pfam</a> | <a href="#">InterPro</a>                 |
| <b>REC-HalOD1</b>  |                          |                                               |     |                         |                      |                                          |
| Hbor_07210         | <a href="#">ADQ66319</a> | response regulator with CheY-like receiver... | CDD | <a href="#">UniProt</a> | <a href="#">Pfam</a> | <a href="#">InterPro</a> (REC-HalOD1)    |
| <b>Other RRs</b>   |                          |                                               |     |                         |                      |                                          |
| Hbor_14290         | <a href="#">ADQ67009</a> | PAS domain S-box [Halogeometricum borinque... | CDD | <a href="#">UniProt</a> | <a href="#">Pfam</a> | <a href="#">InterPro</a> (REC-PAS-HisKA) |

### Halomicrobium mukohataei DSM 12286

#### **HisK, no REC**

|           |                          |                                               |     |                         |                      |                          |
|-----------|--------------------------|-----------------------------------------------|-----|-------------------------|----------------------|--------------------------|
| Hmuk_0028 | <a href="#">ACV46179</a> | histidine kinase [Halomicrobium mukohataei... | CDD | <a href="#">UniProt</a> | <a href="#">Pfam</a> | <a href="#">InterPro</a> |
| Hmuk_0178 | <a href="#">ACV46315</a> | histidine kinase [Halomicrobium mukohataei... | CDD | <a href="#">UniProt</a> | <a href="#">Pfam</a> | <a href="#">InterPro</a> |
| Hmuk_0249 | <a href="#">ACV46386</a> | CheA signal transduction histidine kinase ... | CDD | <a href="#">UniProt</a> | <a href="#">Pfam</a> | <a href="#">InterPro</a> |
| Hmuk_0501 | <a href="#">ACV46635</a> | histidine kinase [Halomicrobium mukohataei... | CDD | <a href="#">UniProt</a> | <a href="#">Pfam</a> | <a href="#">InterPro</a> |
| Hmuk_0502 | <a href="#">ACV46636</a> | PAS/PAC sensor signal transduction histidi... | CDD | <a href="#">UniProt</a> | <a href="#">Pfam</a> | <a href="#">InterPro</a> |
| Hmuk_0626 | <a href="#">ACV46758</a> | PAS/PAC sensor signal transduction histidi... | CDD | <a href="#">UniProt</a> | <a href="#">Pfam</a> | <a href="#">InterPro</a> |
| Hmuk_0715 | <a href="#">ACV46846</a> | PAS/PAC sensor signal transduction histidi... | CDD | <a href="#">UniProt</a> | <a href="#">Pfam</a> | <a href="#">InterPro</a> |
| Hmuk_0851 | <a href="#">ACV46982</a> | PAS/PAC sensor signal transduction histidi... | CDD | <a href="#">UniProt</a> | <a href="#">Pfam</a> | <a href="#">InterPro</a> |
| Hmuk_0999 | <a href="#">ACV47127</a> | histidine kinase [Halomicrobium mukohataei... | CDD | <a href="#">UniProt</a> | <a href="#">Pfam</a> | <a href="#">InterPro</a> |
| Hmuk_1333 | <a href="#">ACV47454</a> | histidine kinase [Halomicrobium mukohataei... | CDD | <a href="#">UniProt</a> | <a href="#">Pfam</a> | <a href="#">InterPro</a> |
| Hmuk_1512 | <a href="#">ACV47627</a> | PAS/PAC sensor signal transduction histidi... | CDD | <a href="#">UniProt</a> | <a href="#">Pfam</a> | <a href="#">InterPro</a> |
| Hmuk_1570 | <a href="#">ACV47684</a> | PAS/PAC sensor signal transduction histidi... | CDD | <a href="#">UniProt</a> | <a href="#">Pfam</a> | <a href="#">InterPro</a> |
| Hmuk_1643 | <a href="#">ACV47757</a> | GAF sensor signal transduction histidine k... | CDD | <a href="#">UniProt</a> | <a href="#">Pfam</a> | <a href="#">InterPro</a> |
| Hmuk_2066 | <a href="#">ACV48179</a> | PAS/PAC sensor signal transduction histidi... | CDD | <a href="#">UniProt</a> | <a href="#">Pfam</a> | <a href="#">InterPro</a> |
| Hmuk_2120 | <a href="#">ACV48233</a> | histidine kinase [Halomicrobium mukohataei... | CDD | <a href="#">UniProt</a> | <a href="#">Pfam</a> | <a href="#">InterPro</a> |
| Hmuk_2229 | <a href="#">ACV48342</a> | PAS/PAC sensor signal transduction histidi... | CDD | <a href="#">UniProt</a> | <a href="#">Pfam</a> | <a href="#">InterPro</a> |
| Hmuk_2243 | <a href="#">ACV48356</a> | histidine kinase [Halomicrobium mukohataei... | CDD | <a href="#">UniProt</a> | <a href="#">Pfam</a> | <a href="#">InterPro</a> |
| Hmuk_2385 | <a href="#">ACV48495</a> | histidine kinase [Halomicrobium mukohataei... | CDD | <a href="#">UniProt</a> | <a href="#">Pfam</a> | <a href="#">InterPro</a> |
| Hmuk_2491 | <a href="#">ACV48599</a> | multi-sensor signal transduction histidine... | CDD | <a href="#">UniProt</a> | <a href="#">Pfam</a> | <a href="#">InterPro</a> |
| Hmuk_2916 | <a href="#">ACV49021</a> | multi-sensor signal transduction histidine... | CDD | <a href="#">UniProt</a> | <a href="#">Pfam</a> | <a href="#">InterPro</a> |
| Hmuk_2976 | <a href="#">ACV49081</a> | PAS/PAC sensor signal transduction histidi... | CDD | <a href="#">UniProt</a> | <a href="#">Pfam</a> | <a href="#">InterPro</a> |

#### **REC only**

|           |                          |                                               |     |                         |                      |                          |
|-----------|--------------------------|-----------------------------------------------|-----|-------------------------|----------------------|--------------------------|
| Hmuk_0237 | <a href="#">ACV46374</a> | response regulator receiver protein [Halom... | CDD | <a href="#">UniProt</a> | <a href="#">Pfam</a> | <a href="#">InterPro</a> |
| Hmuk_0731 | <a href="#">ACV46862</a> | response regulator receiver protein [Halom... | CDD | <a href="#">UniProt</a> | <a href="#">Pfam</a> | <a href="#">InterPro</a> |
| Hmuk_1899 | <a href="#">ACV48012</a> | response regulator receiver protein [Halom... | CDD | <a href="#">UniProt</a> | <a href="#">Pfam</a> | <a href="#">InterPro</a> |

#### **REC-HisK**

|           |                          |                                               |     |                         |                      |                          |
|-----------|--------------------------|-----------------------------------------------|-----|-------------------------|----------------------|--------------------------|
| Hmuk_0184 | <a href="#">ACV46321</a> | histidine kinase [Halomicrobium mukohataei... | CDD | <a href="#">UniProt</a> | <a href="#">Pfam</a> | <a href="#">InterPro</a> |
| Hmuk_0418 | <a href="#">ACV46552</a> | multi-sensor signal transduction histidine... | CDD | <a href="#">UniProt</a> | <a href="#">Pfam</a> | <a href="#">InterPro</a> |
| Hmuk_1670 | <a href="#">ACV47784</a> | multi-sensor signal transduction histidine... | CDD | <a href="#">UniProt</a> | <a href="#">Pfam</a> | <a href="#">InterPro</a> |
| Hmuk_1762 | <a href="#">ACV47876</a> | multi-sensor signal transduction histidine... | CDD | <a href="#">UniProt</a> | <a href="#">Pfam</a> | <a href="#">InterPro</a> |
| Hmuk_1898 | <a href="#">ACV48011</a> | multi-sensor signal transduction histidine... | CDD | <a href="#">UniProt</a> | <a href="#">Pfam</a> | <a href="#">InterPro</a> |
| Hmuk_2699 | <a href="#">ACV48805</a> | multi-sensor signal transduction histidine... | CDD | <a href="#">UniProt</a> | <a href="#">Pfam</a> | <a href="#">InterPro</a> |
| Hmuk_2813 | <a href="#">ACV48918</a> | multi-sensor signal transduction histidine... | CDD | <a href="#">UniProt</a> | <a href="#">Pfam</a> | <a href="#">InterPro</a> |
| Hmuk_3311 | <a href="#">ACV49406</a> | multi-sensor signal transduction histidine... | CDD | <a href="#">UniProt</a> | <a href="#">Pfam</a> | <a href="#">InterPro</a> |

#### **REC-CheB**

|           |                          |                                               |     |                         |                      |                          |
|-----------|--------------------------|-----------------------------------------------|-----|-------------------------|----------------------|--------------------------|
| Hmuk_0248 | <a href="#">ACV46385</a> | response regulator receiver modulated CheB... | CDD | <a href="#">UniProt</a> | <a href="#">Pfam</a> | <a href="#">InterPro</a> |
|-----------|--------------------------|-----------------------------------------------|-----|-------------------------|----------------------|--------------------------|

#### **REC-PAS**

|                   |                          |                                               |     |                         |                      |                                              |
|-------------------|--------------------------|-----------------------------------------------|-----|-------------------------|----------------------|----------------------------------------------|
| Hmuk_3154         | <a href="#">ACV49259</a> | putative PAS/PAC sensor protein [Halomicro... | CDD | <a href="#">UniProt</a> | <a href="#">Pfam</a> | <a href="#">InterPro</a>                     |
| <b>REC-HalX</b>   |                          |                                               |     |                         |                      |                                              |
| Hmuk_0173         | <a href="#">ACV46310</a> | response regulator receiver protein [Halom... | CDD | <a href="#">UniProt</a> | <a href="#">Pfam</a> | <a href="#">InterPro</a>                     |
| Hmuk_1584         | <a href="#">ACV47698</a> | response regulator receiver protein [Halom... | CDD | <a href="#">UniProt</a> | <a href="#">Pfam</a> | <a href="#">InterPro</a>                     |
| Hmuk_1664         | <a href="#">ACV47778</a> | response regulator receiver protein [Halom... | CDD | <a href="#">UniProt</a> | <a href="#">Pfam</a> | <a href="#">InterPro</a>                     |
| Hmuk_1750         | <a href="#">ACV47864</a> | response regulator receiver protein [Halom... | CDD | <a href="#">UniProt</a> | <a href="#">Pfam</a> | <a href="#">InterPro</a>                     |
| Hmuk_1820         | <a href="#">ACV47934</a> | response regulator receiver protein [Halom... | CDD | <a href="#">UniProt</a> | <a href="#">Pfam</a> | <a href="#">InterPro</a>                     |
| Hmuk_1875         | <a href="#">ACV47989</a> | response regulator receiver protein [Halom... | CDD | <a href="#">UniProt</a> | <a href="#">Pfam</a> | <a href="#">InterPro</a>                     |
| Hmuk_2371         | <a href="#">ACV48483</a> | response regulator receiver protein [Halom... | CDD | <a href="#">UniProt</a> | <a href="#">Pfam</a> | <a href="#">InterPro</a>                     |
| Hmuk_2545         | <a href="#">ACV48653</a> | response regulator receiver protein [Halom... | CDD | <a href="#">UniProt</a> | <a href="#">Pfam</a> | <a href="#">InterPro</a>                     |
| Hmuk_2559         | <a href="#">ACV48665</a> | response regulator receiver protein [Halom... | CDD | <a href="#">UniProt</a> | <a href="#">Pfam</a> | <a href="#">InterPro</a>                     |
| <b>BAT</b>        |                          |                                               |     |                         |                      |                                              |
| Hmuk_3382         | <a href="#">ACV49467</a> | putative PAS/PAC sensor protein (plasmid) ... | CDD | <a href="#">UniProt</a> | <a href="#">Pfam</a> | <a href="#">InterPro</a>                     |
| <b>REC-HalOD2</b> |                          |                                               |     |                         |                      |                                              |
| Hmuk_0286         | <a href="#">ACV46423</a> | response regulator receiver protein [Halom... | CDD | <a href="#">UniProt</a> | <a href="#">Pfam</a> | <a href="#">InterPro</a> (REC-HalOD2)        |
| <b>Other RRs</b>  |                          |                                               |     |                         |                      |                                              |
| Hmuk_0285         | <a href="#">ACV46422</a> | response regulator receiver protein [Halom... | CDD | <a href="#">UniProt</a> | <a href="#">Pfam</a> | <a href="#">InterPro</a> (REC-PAS-PAS-HisKA) |

### Halopiger xanaduensis SH-6

#### **HisK, no REC**

|            |                          |                                               |     |                         |                      |                          |
|------------|--------------------------|-----------------------------------------------|-----|-------------------------|----------------------|--------------------------|
| Halxa_0710 | <a href="#">AEH35349</a> | multi-sensor signal transduction histidine... | CDD | <a href="#">UniProt</a> | <a href="#">Pfam</a> | <a href="#">InterPro</a> |
| Halxa_0853 | <a href="#">AEH35492</a> | multi-sensor signal transduction histidine... | CDD | <a href="#">UniProt</a> | <a href="#">Pfam</a> | <a href="#">InterPro</a> |
| Halxa_0871 | <a href="#">AEH35509</a> | GAF sensor signal transduction histidine k... | CDD | <a href="#">UniProt</a> | <a href="#">Pfam</a> | <a href="#">InterPro</a> |
| Halxa_1160 | <a href="#">AEH35793</a> | GAF sensor signal transduction histidine k... | CDD | <a href="#">UniProt</a> | <a href="#">Pfam</a> | <a href="#">InterPro</a> |
| Halxa_1205 | <a href="#">AEH35838</a> | PAS/PAC sensor signal transduction histidi... | CDD | <a href="#">UniProt</a> | <a href="#">Pfam</a> | <a href="#">InterPro</a> |
| Halxa_1517 | <a href="#">AEH36149</a> | integral membrane sensor signal transducti... | CDD | <a href="#">UniProt</a> | <a href="#">Pfam</a> | <a href="#">InterPro</a> |
| Halxa_1872 | <a href="#">AEH36500</a> | multi-sensor signal transduction histidine... | CDD | <a href="#">UniProt</a> | <a href="#">Pfam</a> | <a href="#">InterPro</a> |
| Halxa_2070 | <a href="#">AEH36695</a> | PAS/PAC sensor signal transduction histidi... | CDD | <a href="#">UniProt</a> | <a href="#">Pfam</a> | <a href="#">InterPro</a> |
| Halxa_2205 | <a href="#">AEH36830</a> | GAF sensor signal transduction histidine k... | CDD | <a href="#">UniProt</a> | <a href="#">Pfam</a> | <a href="#">InterPro</a> |
| Halxa_2555 | <a href="#">AEH37173</a> | CheA signal transduction histidine kinase ... | CDD | <a href="#">UniProt</a> | <a href="#">Pfam</a> | <a href="#">InterPro</a> |
| Halxa_2598 | <a href="#">AEH37216</a> | integral membrane sensor signal transducti... | CDD | <a href="#">UniProt</a> | <a href="#">Pfam</a> | <a href="#">InterPro</a> |
| Halxa_2606 | <a href="#">AEH37224</a> | multi-sensor signal transduction histidine... | CDD | <a href="#">UniProt</a> | <a href="#">Pfam</a> | <a href="#">InterPro</a> |
| Halxa_2975 | <a href="#">AEH37591</a> | multi-sensor signal transduction histidine... | CDD | <a href="#">UniProt</a> | <a href="#">Pfam</a> | <a href="#">InterPro</a> |
| Halxa_3261 | <a href="#">AEH37873</a> | PAS sensor protein [Halopiger xanaduensis ... | CDD | <a href="#">UniProt</a> | <a href="#">Pfam</a> | <a href="#">InterPro</a> |
| Halxa_3340 | <a href="#">AEH37952</a> | histidine kinase [Halopiger xanaduensis SH... | CDD | <a href="#">UniProt</a> | <a href="#">Pfam</a> | <a href="#">InterPro</a> |
| Halxa_3341 | <a href="#">AEH37953</a> | PAS/PAC sensor signal transduction histidi... | CDD | <a href="#">UniProt</a> | <a href="#">Pfam</a> | <a href="#">InterPro</a> |
| Halxa_3515 | <a href="#">AEH38126</a> | CheA signal transduction histidine kinase ... | CDD | <a href="#">UniProt</a> | <a href="#">Pfam</a> | <a href="#">InterPro</a> |
| Halxa_3601 | <a href="#">AEH38210</a> | multi-sensor signal transduction histidine... | CDD | <a href="#">UniProt</a> | <a href="#">Pfam</a> | <a href="#">InterPro</a> |
| Halxa_3718 | <a href="#">AEH38325</a> | multi-sensor signal transduction histidine... | CDD | <a href="#">UniProt</a> | <a href="#">Pfam</a> | <a href="#">InterPro</a> |
| Halxa_0502 | <a href="#">AEH39102</a> | multi-sensor signal transduction histidine... | CDD | <a href="#">UniProt</a> | <a href="#">Pfam</a> | <a href="#">InterPro</a> |
| Halxa_0520 | <a href="#">AEH39119</a> | PAS/PAC sensor signal transduction histidi... | CDD | <a href="#">UniProt</a> | <a href="#">Pfam</a> | <a href="#">InterPro</a> |
| Halxa_0578 | <a href="#">AEH39168</a> | PAS/PAC sensor signal transduction histidi... | CDD | <a href="#">UniProt</a> | <a href="#">Pfam</a> | <a href="#">InterPro</a> |
| Halxa_0654 | <a href="#">AEH39233</a> | PAS/PAC sensor signal transduction histidi... | CDD | <a href="#">UniProt</a> | <a href="#">Pfam</a> | <a href="#">InterPro</a> |
| Halxa_0655 | <a href="#">AEH39234</a> | PAS/PAC sensor signal transduction histidi... | CDD | <a href="#">UniProt</a> | <a href="#">Pfam</a> | <a href="#">InterPro</a> |
| Halxa_0677 | <a href="#">AEH39250</a> | PAS/PAC sensor signal transduction histidi... | CDD | <a href="#">UniProt</a> | <a href="#">Pfam</a> | <a href="#">InterPro</a> |
| Halxa_0056 | <a href="#">AEH39308</a> | multi-sensor signal transduction histidine... | CDD | <a href="#">UniProt</a> | <a href="#">Pfam</a> | <a href="#">InterPro</a> |

#### **REC only**

|            |                          |                                               |     |                         |                      |                          |
|------------|--------------------------|-----------------------------------------------|-----|-------------------------|----------------------|--------------------------|
| Halxa_0167 | <a href="#">AEH39410</a> | response regulator receiver (plasmid) [Hal... | CDD | <a href="#">UniProt</a> | <a href="#">Pfam</a> | <a href="#">InterPro</a> |
| Halxa_2553 | <a href="#">AEH37171</a> | response regulator receiver protein [Halop... | CDD | <a href="#">UniProt</a> | <a href="#">Pfam</a> | <a href="#">InterPro</a> |
| Halxa_2712 | <a href="#">AEH37329</a> | response regulator receiver protein [Halop... | CDD | <a href="#">UniProt</a> | <a href="#">Pfam</a> | <a href="#">InterPro</a> |
| Halxa_2962 | <a href="#">AEH37578</a> | response regulator receiver protein [Halop... | CDD | <a href="#">UniProt</a> | <a href="#">Pfam</a> | <a href="#">InterPro</a> |
| Halxa_2976 | <a href="#">AEH37592</a> | response regulator receiver [Halopiger xan... | CDD | <a href="#">UniProt</a> | <a href="#">Pfam</a> | <a href="#">InterPro</a> |
| Halxa_3434 | <a href="#">AEH38045</a> | response regulator receiver protein [Halop... | CDD | <a href="#">UniProt</a> | <a href="#">Pfam</a> | <a href="#">InterPro</a> |
| Halxa_3516 | <a href="#">AEH38127</a> | response regulator receiver protein [Halop... | CDD | <a href="#">UniProt</a> | <a href="#">Pfam</a> | <a href="#">InterPro</a> |
| Halxa_3600 | <a href="#">AEH38209</a> | response regulator receiver protein [Halop... | CDD | <a href="#">UniProt</a> | <a href="#">Pfam</a> | <a href="#">InterPro</a> |
| Halxa_4206 | <a href="#">AEH38808</a> | response regulator receiver protein [Halop... | CDD | <a href="#">UniProt</a> | <a href="#">Pfam</a> | <a href="#">InterPro</a> |
| Halxa_4207 | <a href="#">AEH38809</a> | response regulator receiver protein [Halop... | CDD | <a href="#">UniProt</a> | <a href="#">Pfam</a> | <a href="#">InterPro</a> |

#### **REC-HisK**

|            |                          |                                               |     |                         |                      |                          |
|------------|--------------------------|-----------------------------------------------|-----|-------------------------|----------------------|--------------------------|
| Halxa_1706 | <a href="#">AEH36337</a> | multi-sensor signal transduction histidine... | CDD | <a href="#">UniProt</a> | <a href="#">Pfam</a> | <a href="#">InterPro</a> |
| Halxa_3980 | <a href="#">AEH38585</a> | multi-sensor signal transduction histidine... | CDD | <a href="#">UniProt</a> | <a href="#">Pfam</a> | <a href="#">InterPro</a> |

#### **REC-CheB**

|            |                          |                                               |     |                         |                      |                          |
|------------|--------------------------|-----------------------------------------------|-----|-------------------------|----------------------|--------------------------|
| Halxa_2554 | <a href="#">AEH37172</a> | response regulator receiver modulated CheB... | CDD | <a href="#">UniProt</a> | <a href="#">Pfam</a> | <a href="#">InterPro</a> |
| Halxa_3514 | <a href="#">AEH38125</a> | response regulator receiver modulated CheB... | CDD | <a href="#">UniProt</a> | <a href="#">Pfam</a> | <a href="#">InterPro</a> |

#### **REC-HalX**

|            |                          |                                               |     |                         |                      |                          |
|------------|--------------------------|-----------------------------------------------|-----|-------------------------|----------------------|--------------------------|
| Halxa_2594 | <a href="#">AEH37212</a> | response regulator receiver protein [Halop... | CDD | <a href="#">UniProt</a> | <a href="#">Pfam</a> | <a href="#">InterPro</a> |
| Halxa_3262 | <a href="#">AEH37874</a> | HalX domain protein [Halopiger xanaduensis... | CDD | <a href="#">UniProt</a> | <a href="#">Pfam</a> | <a href="#">InterPro</a> |

#### **BAT**

|            |                          |                                               |     |                         |                      |                          |
|------------|--------------------------|-----------------------------------------------|-----|-------------------------|----------------------|--------------------------|
| Halxa_1652 | <a href="#">AEH36284</a> | response regulator receiver modulated GAF ... | CDD | <a href="#">UniProt</a> | <a href="#">Pfam</a> | <a href="#">InterPro</a> |
| Halxa_3599 | <a href="#">AEH38208</a> | response regulator receiver modulated GAF ... | CDD | <a href="#">UniProt</a> | <a href="#">Pfam</a> | <a href="#">InterPro</a> |

### Haloquadratum walsbyi DSM 16790

#### **HisK, no REC**

|          |                          |                                               |     |                         |                      |                          |
|----------|--------------------------|-----------------------------------------------|-----|-------------------------|----------------------|--------------------------|
| HQ_1280A | <a href="#">CAJ51409</a> | sensor box histidine kinase [Haloquadratum... | CDD | <a href="#">UniProt</a> | <a href="#">Pfam</a> | <a href="#">InterPro</a> |
| HQ_1910A | <a href="#">CAJ52038</a> | sensor box histidine kinase [Haloquadratum... | CDD | <a href="#">UniProt</a> | <a href="#">Pfam</a> | <a href="#">InterPro</a> |
| HQ_2749A | <a href="#">CAJ52857</a> | sensor box histidine kinase [Haloquadratum... | CDD | <a href="#">UniProt</a> | <a href="#">Pfam</a> | <a href="#">InterPro</a> |
| HQ_2814A | <a href="#">CAJ52921</a> | sensor box histidine kinase [Haloquadratum... | CDD | <a href="#">UniProt</a> | <a href="#">Pfam</a> | <a href="#">InterPro</a> |



|                 |                          |                                               |                     |                         |                      |                          |            |
|-----------------|--------------------------|-----------------------------------------------|---------------------|-------------------------|----------------------|--------------------------|------------|
| <b>REC only</b> |                          |                                               |                     |                         |                      |                          |            |
| HQ_2751A        | <a href="#">CAJ52859</a> | receiver box response regulator [Haloquadr... | <a href="#">CDD</a> | <a href="#">UniProt</a> | <a href="#">Pfam</a> | <a href="#">InterPro</a> |            |
| <b>REC-HisK</b> |                          |                                               |                     |                         |                      |                          |            |
| HQ_1073A        | <a href="#">CAJ51203</a> | receiver/sensor box histidine kinase [Halo... | <a href="#">CDD</a> | <a href="#">UniProt</a> | <a href="#">Pfam</a> | <a href="#">InterPro</a> |            |
| HQ_2141A        | <a href="#">CAJ52268</a> | receiver/sensor box histidine kinase [Halo... | <a href="#">CDD</a> | <a href="#">UniProt</a> | <a href="#">Pfam</a> | <a href="#">InterPro</a> |            |
| HQ_4020A        | <a href="#">CAJ51110</a> | receiver/sensor box histidine kinase [Halo... | <a href="#">CDD</a> | <a href="#">UniProt</a> | <a href="#">Pfam</a> | <a href="#">InterPro</a> |            |
| <b>Hxlr-REC</b> |                          |                                               |                     |                         |                      |                          |            |
| HQ_1946A        | <a href="#">CAJ52074</a> | HxlR family transcription regulator / rece... | <a href="#">CDD</a> | <a href="#">UniProt</a> | <a href="#">Pfam</a> | <a href="#">InterPro</a> | (wHTH-REC) |
| <b>BAT</b>      |                          |                                               |                     |                         |                      |                          |            |
| HQ_2750A        | <a href="#">CAJ52858</a> | receiver/bat box HTH-10 family transcripti... | <a href="#">CDD</a> | <a href="#">UniProt</a> | <a href="#">Pfam</a> | <a href="#">InterPro</a> |            |

### Halorhabdus tiamatea SARL4B

#### **HisK, no REC**

|            |                          |                                               |                     |                         |                      |                          |  |
|------------|--------------------------|-----------------------------------------------|---------------------|-------------------------|----------------------|--------------------------|--|
| HTIA_0018  | <a href="#">CCQ32170</a> | PAS/PAC sensor signal transduction histidi... | <a href="#">CDD</a> | <a href="#">UniProt</a> | <a href="#">Pfam</a> | <a href="#">InterPro</a> |  |
| HTIA_0112  | <a href="#">CCQ32263</a> | signal transduction histidine kinase [Halo... | <a href="#">CDD</a> | <a href="#">UniProt</a> | <a href="#">Pfam</a> | <a href="#">InterPro</a> |  |
| HTIA_0322  | <a href="#">CCQ32472</a> | PAS/PAC sensor signal transduction histidi... | <a href="#">CDD</a> | <a href="#">UniProt</a> | <a href="#">Pfam</a> | <a href="#">InterPro</a> |  |
| HTIA_0434  | <a href="#">CCQ32580</a> | signal-transducing histidine kinase [Halor... | <a href="#">CDD</a> | <a href="#">UniProt</a> | <a href="#">Pfam</a> | <a href="#">InterPro</a> |  |
| HTIA_0795  | <a href="#">CCQ32935</a> | signal transduction histidine kinase CheA ... | <a href="#">CDD</a> | <a href="#">UniProt</a> | <a href="#">Pfam</a> | <a href="#">InterPro</a> |  |
| HTIA_0884  | <a href="#">CCQ33024</a> | PAS/PAC sensor signal transduction histidi... | <a href="#">CDD</a> | <a href="#">UniProt</a> | <a href="#">Pfam</a> | <a href="#">InterPro</a> |  |
| HTIA_1402  | <a href="#">CCQ33530</a> | histidine kinase [Halorhabdus tiamatea SAR... | <a href="#">CDD</a> | <a href="#">UniProt</a> | <a href="#">Pfam</a> | <a href="#">InterPro</a> |  |
| HTIA_1479  | <a href="#">CCQ33606</a> | signal-transducing histidine kinase [Halor... | <a href="#">CDD</a> | <a href="#">UniProt</a> | <a href="#">Pfam</a> | <a href="#">InterPro</a> |  |
| HTIA_1523  | <a href="#">CCQ33650</a> | histidine kinase [Halorhabdus tiamatea SAR... | <a href="#">CDD</a> | <a href="#">UniProt</a> | <a href="#">Pfam</a> | <a href="#">InterPro</a> |  |
| HTIA_1528  | <a href="#">CCQ33655</a> | integral membrane sensor signal transducti... | <a href="#">CDD</a> | <a href="#">UniProt</a> | <a href="#">Pfam</a> | <a href="#">InterPro</a> |  |
| HTIA_1575  | <a href="#">CCQ33702</a> | PAS/PAC sensor signal transduction histidi... | <a href="#">CDD</a> | <a href="#">UniProt</a> | <a href="#">Pfam</a> | <a href="#">InterPro</a> |  |
| HTIA_1926  | <a href="#">CCQ34044</a> | PAS/PAC sensor signal transduction histidi... | <a href="#">CDD</a> | <a href="#">UniProt</a> | <a href="#">Pfam</a> | <a href="#">InterPro</a> |  |
| HTIA_2045  | <a href="#">CCQ34159</a> | PAS/PAC sensor signal transduction histidi... | <a href="#">CDD</a> | <a href="#">UniProt</a> | <a href="#">Pfam</a> | <a href="#">InterPro</a> |  |
| HTIA_2055  | <a href="#">CCQ34169</a> | signal-transducing histidine kinase [Halor... | <a href="#">CDD</a> | <a href="#">UniProt</a> | <a href="#">Pfam</a> | <a href="#">InterPro</a> |  |
| HTIA_2153  | <a href="#">CCQ34265</a> | membrane bound his kinase A [Halorhabdus t... | <a href="#">CDD</a> | <a href="#">UniProt</a> | <a href="#">Pfam</a> | <a href="#">InterPro</a> |  |
| HTIA_2580  | <a href="#">CCQ34686</a> | signal-transducing histidine kinase-like p... | <a href="#">CDD</a> | <a href="#">UniProt</a> | <a href="#">Pfam</a> | <a href="#">InterPro</a> |  |
| HTIA_2756  | <a href="#">CCQ34858</a> | signal-transducing histidine kinase [Halor... | <a href="#">CDD</a> | <a href="#">UniProt</a> | <a href="#">Pfam</a> | <a href="#">InterPro</a> |  |
| HTIA_p2847 | <a href="#">CCQ34949</a> | histidine kinase (plasmid) [Halorhabdus ti... | <a href="#">CDD</a> | <a href="#">UniProt</a> | <a href="#">Pfam</a> | <a href="#">InterPro</a> |  |

#### **REC only**

|           |                          |                                               |                     |                         |                      |                          |  |
|-----------|--------------------------|-----------------------------------------------|---------------------|-------------------------|----------------------|--------------------------|--|
| HTIA_0228 | <a href="#">CCQ32379</a> | signal transduction response regulator [Ha... | <a href="#">CDD</a> | <a href="#">UniProt</a> | <a href="#">Pfam</a> | <a href="#">InterPro</a> |  |
| HTIA_0805 | <a href="#">CCQ32945</a> | chemotaxis regulator-transmits chemorecept... | <a href="#">CDD</a> | <a href="#">UniProt</a> | <a href="#">Pfam</a> | <a href="#">InterPro</a> |  |
| HTIA_1483 | <a href="#">CCQ33610</a> | response regulator receiver protein [Halor... | <a href="#">CDD</a> | <a href="#">UniProt</a> | <a href="#">Pfam</a> | <a href="#">InterPro</a> |  |
| HTIA_2678 | <a href="#">CCQ34783</a> | signal transduction histidine kinase [Halo... | <a href="#">CDD</a> | <a href="#">UniProt</a> | <a href="#">Pfam</a> | <a href="#">InterPro</a> |  |

#### **REC-HisK**

|           |                          |                                               |                     |                         |                      |                          |  |
|-----------|--------------------------|-----------------------------------------------|---------------------|-------------------------|----------------------|--------------------------|--|
| HTIA_0110 | <a href="#">CCQ32261</a> | multi-sensor signal transduction histidine... | <a href="#">CDD</a> | <a href="#">UniProt</a> | <a href="#">Pfam</a> | <a href="#">InterPro</a> |  |
| HTIA_0113 | <a href="#">CCQ32264</a> | PAS/PAC sensor signal transduction histidi... | <a href="#">CDD</a> | <a href="#">UniProt</a> | <a href="#">Pfam</a> | <a href="#">InterPro</a> |  |
| HTIA_0716 | <a href="#">CCQ32856</a> | multi-sensor signal transduction histidine... | <a href="#">CDD</a> | <a href="#">UniProt</a> | <a href="#">Pfam</a> | <a href="#">InterPro</a> |  |
| HTIA_1478 | <a href="#">CCQ33605</a> | 11-domain light and oxygen sensing his kin... | <a href="#">CDD</a> | <a href="#">UniProt</a> | <a href="#">Pfam</a> | <a href="#">InterPro</a> |  |
| HTIA_1530 | <a href="#">CCQ33657</a> | multi-sensor signal transduction histidine... | <a href="#">CDD</a> | <a href="#">UniProt</a> | <a href="#">Pfam</a> | <a href="#">InterPro</a> |  |
| HTIA_1900 | <a href="#">CCQ34019</a> | multi-sensor signal transduction histidine... | <a href="#">CDD</a> | <a href="#">UniProt</a> | <a href="#">Pfam</a> | <a href="#">InterPro</a> |  |
| HTIA_2537 | <a href="#">CCQ34643</a> | multi-sensor signal transduction histidine... | <a href="#">CDD</a> | <a href="#">UniProt</a> | <a href="#">Pfam</a> | <a href="#">InterPro</a> |  |

#### **REC-CheB**

|           |                          |                                               |                     |                         |                      |                          |  |
|-----------|--------------------------|-----------------------------------------------|---------------------|-------------------------|----------------------|--------------------------|--|
| HTIA_0796 | <a href="#">CCQ32936</a> | chemotaxis response regulator protein-glut... | <a href="#">CDD</a> | <a href="#">UniProt</a> | <a href="#">Pfam</a> | <a href="#">InterPro</a> |  |
|-----------|--------------------------|-----------------------------------------------|---------------------|-------------------------|----------------------|--------------------------|--|

#### **REC-HalX**

|           |                          |                                               |                     |                         |                      |                          |  |
|-----------|--------------------------|-----------------------------------------------|---------------------|-------------------------|----------------------|--------------------------|--|
| HTIA_0537 | <a href="#">CCQ32682</a> | HoxA-like transcriptional regulator [Halor... | <a href="#">CDD</a> | <a href="#">UniProt</a> | <a href="#">Pfam</a> | <a href="#">InterPro</a> |  |
| HTIA_0664 | <a href="#">CCQ32807</a> | HoxA-like transcriptional regulator [Halor... | <a href="#">CDD</a> | <a href="#">UniProt</a> | <a href="#">Pfam</a> | <a href="#">InterPro</a> |  |
| HTIA_1808 | <a href="#">CCQ33932</a> | response regulator receiver protein [Halor... | <a href="#">CDD</a> | <a href="#">UniProt</a> | <a href="#">Pfam</a> | <a href="#">InterPro</a> |  |
| HTIA_2784 | <a href="#">CCQ34886</a> | HalX-type transcriptional regulator [Halor... | <a href="#">CDD</a> | <a href="#">UniProt</a> | <a href="#">Pfam</a> | <a href="#">InterPro</a> |  |

#### **BAT**

|           |                          |                                               |                     |                         |                      |                          |  |
|-----------|--------------------------|-----------------------------------------------|---------------------|-------------------------|----------------------|--------------------------|--|
| HTIA_0508 | <a href="#">CCQ32653</a> | bacterio-opsin activator HTH domain protei... | <a href="#">CDD</a> | <a href="#">UniProt</a> | <a href="#">Pfam</a> | <a href="#">InterPro</a> |  |
|-----------|--------------------------|-----------------------------------------------|---------------------|-------------------------|----------------------|--------------------------|--|

### Halorhabdus utahensis DSM 12940

#### **HisK, no REC**

|           |                          |                                               |                     |                         |                      |                          |  |
|-----------|--------------------------|-----------------------------------------------|---------------------|-------------------------|----------------------|--------------------------|--|
| Huta_0059 | <a href="#">ACV10248</a> | PAS/PAC sensor signal transduction histidi... | <a href="#">CDD</a> | <a href="#">UniProt</a> | <a href="#">Pfam</a> | <a href="#">InterPro</a> |  |
| Huta_0175 | <a href="#">ACV10363</a> | histidine kinase [Halorhabdus utahensis DS... | <a href="#">CDD</a> | <a href="#">UniProt</a> | <a href="#">Pfam</a> | <a href="#">InterPro</a> |  |
| Huta_0199 | <a href="#">ACV10387</a> | PAS/PAC sensor signal transduction histidi... | <a href="#">CDD</a> | <a href="#">UniProt</a> | <a href="#">Pfam</a> | <a href="#">InterPro</a> |  |
| Huta_0253 | <a href="#">ACV10441</a> | histidine kinase [Halorhabdus utahensis DS... | <a href="#">CDD</a> | <a href="#">UniProt</a> | <a href="#">Pfam</a> | <a href="#">InterPro</a> |  |
| Huta_0313 | <a href="#">ACV10500</a> | PAS/PAC sensor signal transduction histidi... | <a href="#">CDD</a> | <a href="#">UniProt</a> | <a href="#">Pfam</a> | <a href="#">InterPro</a> |  |
| Huta_0421 | <a href="#">ACV10608</a> | PAS/PAC sensor signal transduction histidi... | <a href="#">CDD</a> | <a href="#">UniProt</a> | <a href="#">Pfam</a> | <a href="#">InterPro</a> |  |
| Huta_0929 | <a href="#">ACV11112</a> | histidine kinase [Halorhabdus utahensis DS... | <a href="#">CDD</a> | <a href="#">UniProt</a> | <a href="#">Pfam</a> | <a href="#">InterPro</a> |  |
| Huta_0942 | <a href="#">ACV11125</a> | CheA signal transduction histidine kinase ... | <a href="#">CDD</a> | <a href="#">UniProt</a> | <a href="#">Pfam</a> | <a href="#">InterPro</a> |  |
| Huta_0978 | <a href="#">ACV11161</a> | PAS/PAC sensor signal transduction histidi... | <a href="#">CDD</a> | <a href="#">UniProt</a> | <a href="#">Pfam</a> | <a href="#">InterPro</a> |  |
| Huta_1026 | <a href="#">ACV11209</a> | PAS/PAC sensor signal transduction histidi... | <a href="#">CDD</a> | <a href="#">UniProt</a> | <a href="#">Pfam</a> | <a href="#">InterPro</a> |  |
| Huta_1464 | <a href="#">ACV11640</a> | PAS/PAC sensor signal transduction histidi... | <a href="#">CDD</a> | <a href="#">UniProt</a> | <a href="#">Pfam</a> | <a href="#">InterPro</a> |  |
| Huta_1519 | <a href="#">ACV11694</a> | histidine kinase [Halorhabdus utahensis DS... | <a href="#">CDD</a> | <a href="#">UniProt</a> | <a href="#">Pfam</a> | <a href="#">InterPro</a> |  |
| Huta_1570 | <a href="#">ACV11745</a> | GAF sensor signal transduction histidine k... | <a href="#">CDD</a> | <a href="#">UniProt</a> | <a href="#">Pfam</a> | <a href="#">InterPro</a> |  |
| Huta_1591 | <a href="#">ACV11766</a> | PAS/PAC sensor signal transduction histidi... | <a href="#">CDD</a> | <a href="#">UniProt</a> | <a href="#">Pfam</a> | <a href="#">InterPro</a> |  |
| Huta_1646 | <a href="#">ACV11820</a> | histidine kinase [Halorhabdus utahensis DS... | <a href="#">CDD</a> | <a href="#">UniProt</a> | <a href="#">Pfam</a> | <a href="#">InterPro</a> |  |
| Huta_1743 | <a href="#">ACV11915</a> | histidine kinase [Halorhabdus utahensis DS... | <a href="#">CDD</a> | <a href="#">UniProt</a> | <a href="#">Pfam</a> | <a href="#">InterPro</a> |  |
| Huta_1749 | <a href="#">ACV11921</a> | histidine kinase [Halorhabdus utahensis DS... | <a href="#">CDD</a> | <a href="#">UniProt</a> | <a href="#">Pfam</a> | <a href="#">InterPro</a> |  |
| Huta_1771 | <a href="#">ACV11943</a> | PAS/PAC sensor signal transduction histidi... | <a href="#">CDD</a> | <a href="#">UniProt</a> | <a href="#">Pfam</a> | <a href="#">InterPro</a> |  |
| Huta_1802 | <a href="#">ACV11974</a> | signal transduction histidine kinase regul... | <a href="#">CDD</a> | <a href="#">UniProt</a> | <a href="#">Pfam</a> | <a href="#">InterPro</a> |  |
| Huta_1868 | <a href="#">ACV12038</a> | PAS/PAC sensor signal transduction histidi... | <a href="#">CDD</a> | <a href="#">UniProt</a> | <a href="#">Pfam</a> | <a href="#">InterPro</a> |  |
| Huta_2078 | <a href="#">ACV12245</a> | PAS/PAC sensor signal transduction histidi... | <a href="#">CDD</a> | <a href="#">UniProt</a> | <a href="#">Pfam</a> | <a href="#">InterPro</a> |  |

|                    |                          |                                               |                     |                         |                      |                          |
|--------------------|--------------------------|-----------------------------------------------|---------------------|-------------------------|----------------------|--------------------------|
| Huta_2186          | <a href="#">ACV12353</a> | histidine kinase [Halorhabdus utahensis DS... | <a href="#">CDD</a> | <a href="#">UniProt</a> | <a href="#">Pfam</a> | <a href="#">InterPro</a> |
| Huta_2195          | <a href="#">ACV12362</a> | multi-sensor signal transduction histidine... | <a href="#">CDD</a> | <a href="#">UniProt</a> | <a href="#">Pfam</a> | <a href="#">InterPro</a> |
| Huta_2204          | <a href="#">ACV12371</a> | PAS/PAC sensor signal transduction histidi... | <a href="#">CDD</a> | <a href="#">UniProt</a> | <a href="#">Pfam</a> | <a href="#">InterPro</a> |
| Huta_2266          | <a href="#">ACV12433</a> | PAS/PAC sensor signal transduction histidi... | <a href="#">CDD</a> | <a href="#">UniProt</a> | <a href="#">Pfam</a> | <a href="#">InterPro</a> |
| Huta_2318          | <a href="#">ACV12485</a> | PAS/PAC sensor signal transduction histidi... | <a href="#">CDD</a> | <a href="#">UniProt</a> | <a href="#">Pfam</a> | <a href="#">InterPro</a> |
| Huta_2352          | <a href="#">ACV12518</a> | histidine kinase [Halorhabdus utahensis DS... | <a href="#">CDD</a> | <a href="#">UniProt</a> | <a href="#">Pfam</a> | <a href="#">InterPro</a> |
| Huta_2425          | <a href="#">ACV12591</a> | membrane bound his kinase A [Halorhabdus u... | <a href="#">CDD</a> | <a href="#">UniProt</a> | <a href="#">Pfam</a> | <a href="#">InterPro</a> |
| Huta_2850          | <a href="#">ACV13011</a> | histidine kinase [Halorhabdus utahensis DS... | <a href="#">CDD</a> | <a href="#">UniProt</a> | <a href="#">Pfam</a> | <a href="#">InterPro</a> |
| Huta_2881          | <a href="#">ACV13042</a> | PAS/PAC sensor signal transduction histidi... | <a href="#">CDD</a> | <a href="#">UniProt</a> | <a href="#">Pfam</a> | <a href="#">InterPro</a> |
| Huta_2923          | <a href="#">ACV13084</a> | histidine kinase [Halorhabdus utahensis DS... | <a href="#">CDD</a> | <a href="#">UniProt</a> | <a href="#">Pfam</a> | <a href="#">InterPro</a> |
| <b>REC only</b>    |                          |                                               |                     |                         |                      |                          |
| Huta_0953          | <a href="#">ACV11136</a> | response regulator receiver protein [Halor... | <a href="#">CDD</a> | <a href="#">UniProt</a> | <a href="#">Pfam</a> | <a href="#">InterPro</a> |
| Huta_1567          | <a href="#">ACV11742</a> | response regulator receiver protein [Halor... | <a href="#">CDD</a> | <a href="#">UniProt</a> | <a href="#">Pfam</a> | <a href="#">InterPro</a> |
| Huta_1869          | <a href="#">ACV12039</a> | response regulator receiver protein [Halor... | <a href="#">CDD</a> | <a href="#">UniProt</a> | <a href="#">Pfam</a> | <a href="#">InterPro</a> |
| Huta_3023          | <a href="#">ACV13184</a> | response regulator receiver protein [Halor... | <a href="#">CDD</a> | <a href="#">UniProt</a> | <a href="#">Pfam</a> | <a href="#">InterPro</a> |
| <b>REC-HisK</b>    |                          |                                               |                     |                         |                      |                          |
| Huta_0261          | <a href="#">ACV10449</a> | multi-sensor signal transduction histidine... | <a href="#">CDD</a> | <a href="#">UniProt</a> | <a href="#">Pfam</a> | <a href="#">InterPro</a> |
| Huta_0330          | <a href="#">ACV10517</a> | multi-sensor signal transduction histidine... | <a href="#">CDD</a> | <a href="#">UniProt</a> | <a href="#">Pfam</a> | <a href="#">InterPro</a> |
| Huta_0496          | <a href="#">ACV10683</a> | multi-sensor signal transduction histidine... | <a href="#">CDD</a> | <a href="#">UniProt</a> | <a href="#">Pfam</a> | <a href="#">InterPro</a> |
| Huta_0888          | <a href="#">ACV11071</a> | multi-sensor signal transduction histidine... | <a href="#">CDD</a> | <a href="#">UniProt</a> | <a href="#">Pfam</a> | <a href="#">InterPro</a> |
| Huta_1511          | <a href="#">ACV11686</a> | multi-sensor signal transduction histidine... | <a href="#">CDD</a> | <a href="#">UniProt</a> | <a href="#">Pfam</a> | <a href="#">InterPro</a> |
| Huta_1571          | <a href="#">ACV11746</a> | multi-sensor signal transduction histidine... | <a href="#">CDD</a> | <a href="#">UniProt</a> | <a href="#">Pfam</a> | <a href="#">InterPro</a> |
| Huta_1870          | <a href="#">ACV12040</a> | response regulator receiver sensor signal ... | <a href="#">CDD</a> | <a href="#">UniProt</a> | <a href="#">Pfam</a> | <a href="#">InterPro</a> |
| Huta_2351          | <a href="#">ACV12517</a> | multi-sensor signal transduction histidine... | <a href="#">CDD</a> | <a href="#">UniProt</a> | <a href="#">Pfam</a> | <a href="#">InterPro</a> |
| Huta_2409          | <a href="#">ACV12575</a> | multi-sensor signal transduction histidine... | <a href="#">CDD</a> | <a href="#">UniProt</a> | <a href="#">Pfam</a> | <a href="#">InterPro</a> |
| Huta_2488          | <a href="#">ACV12652</a> | multi-sensor signal transduction histidine... | <a href="#">CDD</a> | <a href="#">UniProt</a> | <a href="#">Pfam</a> | <a href="#">InterPro</a> |
| Huta_3020          | <a href="#">ACV13181</a> | multi-sensor signal transduction histidine... | <a href="#">CDD</a> | <a href="#">UniProt</a> | <a href="#">Pfam</a> | <a href="#">InterPro</a> |
| <b>REC-CheB</b>    |                          |                                               |                     |                         |                      |                          |
| Huta_0943          | <a href="#">ACV11126</a> | response regulator receiver modulated CheB... | <a href="#">CDD</a> | <a href="#">UniProt</a> | <a href="#">Pfam</a> | <a href="#">InterPro</a> |
| <b>REC-PAS/GAF</b> |                          |                                               |                     |                         |                      |                          |
| Huta_0510          | <a href="#">ACV10697</a> | putative PAS/PAC sensor protein [Halorhabd... | <a href="#">CDD</a> | <a href="#">UniProt</a> | <a href="#">Pfam</a> | <a href="#">InterPro</a> |
| Huta_1892          | <a href="#">ACV12061</a> | putative PAS/PAC sensor protein [Halorhabd... | <a href="#">CDD</a> | <a href="#">UniProt</a> | <a href="#">Pfam</a> | <a href="#">InterPro</a> |
| Huta_2350          | <a href="#">ACV12516</a> | putative GAF sensor protein [Halorhabdus u... | <a href="#">CDD</a> | <a href="#">UniProt</a> | <a href="#">Pfam</a> | <a href="#">InterPro</a> |
| Huta_2566          | <a href="#">ACV12730</a> | response regulator receiver modulated GAF ... | <a href="#">CDD</a> | <a href="#">UniProt</a> | <a href="#">Pfam</a> | <a href="#">InterPro</a> |
| <b>REC-HalX</b>    |                          |                                               |                     |                         |                      |                          |
| Huta_0359          | <a href="#">ACV10546</a> | response regulator receiver protein [Halor... | <a href="#">CDD</a> | <a href="#">UniProt</a> | <a href="#">Pfam</a> | <a href="#">InterPro</a> |
| Huta_0772          | <a href="#">ACV10957</a> | response regulator receiver protein [Halor... | <a href="#">CDD</a> | <a href="#">UniProt</a> | <a href="#">Pfam</a> | <a href="#">InterPro</a> |
| Huta_1740          | <a href="#">ACV11912</a> | response regulator receiver protein [Halor... | <a href="#">CDD</a> | <a href="#">UniProt</a> | <a href="#">Pfam</a> | <a href="#">InterPro</a> |
| Huta_1770          | <a href="#">ACV11942</a> | response regulator receiver protein [Halor... | <a href="#">CDD</a> | <a href="#">UniProt</a> | <a href="#">Pfam</a> | <a href="#">InterPro</a> |
| Huta_1773          | <a href="#">ACV11945</a> | response regulator receiver protein [Halor... | <a href="#">CDD</a> | <a href="#">UniProt</a> | <a href="#">Pfam</a> | <a href="#">InterPro</a> |
| Huta_1858          | <a href="#">ACV12028</a> | response regulator receiver protein [Halor... | <a href="#">CDD</a> | <a href="#">UniProt</a> | <a href="#">Pfam</a> | <a href="#">InterPro</a> |
| Huta_2885          | <a href="#">ACV13046</a> | response regulator receiver protein [Halor... | <a href="#">CDD</a> | <a href="#">UniProt</a> | <a href="#">Pfam</a> | <a href="#">InterPro</a> |
| <b>BAT</b>         |                          |                                               |                     |                         |                      |                          |
| Huta_0317          | <a href="#">ACV10504</a> | putative PAS/PAC sensor protein [Halorhabd... | <a href="#">CDD</a> | <a href="#">UniProt</a> | <a href="#">Pfam</a> | <a href="#">InterPro</a> |
| Huta_2079          | <a href="#">ACV12246</a> | putative PAS/PAC sensor protein [Halorhabd... | <a href="#">CDD</a> | <a href="#">UniProt</a> | <a href="#">Pfam</a> | <a href="#">InterPro</a> |

### Halorientalis sp. IM1011

#### **HisK, no REC**

|             |                          |                                              |                     |                         |                      |                          |
|-------------|--------------------------|----------------------------------------------|---------------------|-------------------------|----------------------|--------------------------|
| BV210_01020 | <a href="#">AQL41381</a> | hypothetical protein BV210_01020 [Halorie... | <a href="#">CDD</a> | <a href="#">UniProt</a> | <a href="#">Pfam</a> | <a href="#">InterPro</a> |
| BV210_01525 | <a href="#">AQL41472</a> | histidine kinase [Halorientalis sp. IM101... | <a href="#">CDD</a> | <a href="#">UniProt</a> | <a href="#">Pfam</a> | <a href="#">InterPro</a> |
| BV210_02185 | <a href="#">AQL41594</a> | hypothetical protein BV210_02185 [Halorie... | <a href="#">CDD</a> | <a href="#">UniProt</a> | <a href="#">Pfam</a> | <a href="#">InterPro</a> |
| BV210_02225 | <a href="#">AQL41602</a> | hypothetical protein BV210_02225 [Halorie... | <a href="#">CDD</a> | <a href="#">UniProt</a> | <a href="#">Pfam</a> | <a href="#">InterPro</a> |
| BV210_03255 | <a href="#">AQL41792</a> | hypothetical protein BV210_03255 [Halorie... | <a href="#">CDD</a> | <a href="#">UniProt</a> | <a href="#">Pfam</a> | <a href="#">InterPro</a> |
| BV210_03425 | <a href="#">AQL41822</a> | histidine kinase [Halorientalis sp. IM101... | <a href="#">CDD</a> | <a href="#">UniProt</a> | <a href="#">Pfam</a> | <a href="#">InterPro</a> |
| BV210_03465 | <a href="#">AQL41829</a> | hypothetical protein BV210_03465 [Halorie... | <a href="#">CDD</a> | <a href="#">UniProt</a> | <a href="#">Pfam</a> | <a href="#">InterPro</a> |
| BV210_03490 | <a href="#">AQL41834</a> | hypothetical protein BV210_03490 [Halorie... | <a href="#">CDD</a> | <a href="#">UniProt</a> | <a href="#">Pfam</a> | <a href="#">InterPro</a> |
| BV210_04000 | <a href="#">AQL41928</a> | hypothetical protein BV210_04000 [Halorie... | <a href="#">CDD</a> | <a href="#">UniProt</a> | <a href="#">Pfam</a> | <a href="#">InterPro</a> |
| BV210_05560 | <a href="#">AQL44485</a> | diguanylate cyclase [Halorientalis sp. IM... | <a href="#">CDD</a> | <a href="#">UniProt</a> | <a href="#">Pfam</a> | <a href="#">InterPro</a> |
| BV210_05580 | <a href="#">AQL42215</a> | hypothetical protein BV210_05580 [Halorie... | <a href="#">CDD</a> | <a href="#">UniProt</a> | <a href="#">Pfam</a> | <a href="#">InterPro</a> |
| BV210_05725 | <a href="#">AQL42242</a> | hypothetical protein BV210_05725 [Halorie... | <a href="#">CDD</a> | <a href="#">UniProt</a> | <a href="#">Pfam</a> | <a href="#">InterPro</a> |
| BV210_07575 | <a href="#">AQL42576</a> | hypothetical protein BV210_07575 [Halorie... | <a href="#">CDD</a> | <a href="#">UniProt</a> | <a href="#">Pfam</a> | <a href="#">InterPro</a> |
| BV210_08000 | <a href="#">AQL42656</a> | hypothetical protein BV210_08000 [Halorie... | <a href="#">CDD</a> | <a href="#">UniProt</a> | <a href="#">Pfam</a> | <a href="#">InterPro</a> |
| BV210_08470 | <a href="#">AQL42742</a> | hypothetical protein BV210_08470 [Halorie... | <a href="#">CDD</a> | <a href="#">UniProt</a> | <a href="#">Pfam</a> | <a href="#">InterPro</a> |
| BV210_08685 | <a href="#">AQL42782</a> | hypothetical protein BV210_08685 [Halorie... | <a href="#">CDD</a> | <a href="#">UniProt</a> | <a href="#">Pfam</a> | <a href="#">InterPro</a> |
| BV210_08815 | <a href="#">AQL42805</a> | hypothetical protein BV210_08815 [Halorie... | <a href="#">CDD</a> | <a href="#">UniProt</a> | <a href="#">Pfam</a> | <a href="#">InterPro</a> |
| BV210_08875 | <a href="#">AQL42817</a> | hypothetical protein BV210_08875 [Halorie... | <a href="#">CDD</a> | <a href="#">UniProt</a> | <a href="#">Pfam</a> | <a href="#">InterPro</a> |
| BV210_09240 | <a href="#">AQL42886</a> | hypothetical protein BV210_09240 [Halorie... | <a href="#">CDD</a> | <a href="#">UniProt</a> | <a href="#">Pfam</a> | <a href="#">InterPro</a> |
| BV210_09745 | <a href="#">AQL42979</a> | hypothetical protein BV210_09745 [Halorie... | <a href="#">CDD</a> | <a href="#">UniProt</a> | <a href="#">Pfam</a> | <a href="#">InterPro</a> |
| BV210_10135 | <a href="#">AQL43053</a> | hypothetical protein BV210_10135 [Halorie... | <a href="#">CDD</a> | <a href="#">UniProt</a> | <a href="#">Pfam</a> | <a href="#">InterPro</a> |
| BV210_10340 | <a href="#">AQL43087</a> | chemotaxis protein CheA [Halorientalis sp... | <a href="#">CDD</a> | <a href="#">UniProt</a> | <a href="#">Pfam</a> | <a href="#">InterPro</a> |
| BV210_10560 | <a href="#">AQL43129</a> | hypothetical protein BV210_10560 [Halorie... | <a href="#">CDD</a> | <a href="#">UniProt</a> | <a href="#">Pfam</a> | <a href="#">InterPro</a> |
| BV210_10935 | <a href="#">AQL43201</a> | histidine kinase [Halorientalis sp. IM101... | <a href="#">CDD</a> | <a href="#">UniProt</a> | <a href="#">Pfam</a> | <a href="#">InterPro</a> |
| BV210_11115 | <a href="#">AQL43234</a> | hypothetical protein BV210_11115 [Halorie... | <a href="#">CDD</a> | <a href="#">UniProt</a> | <a href="#">Pfam</a> | <a href="#">InterPro</a> |
| BV210_12030 | <a href="#">AQL43373</a> | hypothetical protein BV210_12030 [Halorie... | <a href="#">CDD</a> | <a href="#">UniProt</a> | <a href="#">Pfam</a> | <a href="#">InterPro</a> |
| BV210_12210 | <a href="#">AQL43408</a> | hypothetical protein BV210_12210 [Halorie... | <a href="#">CDD</a> | <a href="#">UniProt</a> | <a href="#">Pfam</a> | <a href="#">InterPro</a> |
| BV210_12340 | <a href="#">AQL43432</a> | hypothetical protein BV210_12340 [Halorie... | <a href="#">CDD</a> | <a href="#">UniProt</a> | <a href="#">Pfam</a> | <a href="#">InterPro</a> |
| BV210_12765 | <a href="#">AQL43513</a> | hypothetical protein BV210_12765 [Halorie... | <a href="#">CDD</a> | <a href="#">UniProt</a> | <a href="#">Pfam</a> | <a href="#">InterPro</a> |
| BV210_13050 | <a href="#">AQL43566</a> | histidine kinase [Halorientalis sp. IM101... | <a href="#">CDD</a> | <a href="#">UniProt</a> | <a href="#">Pfam</a> | <a href="#">InterPro</a> |

|                      |                          |                                              |     |                         |                      |                                          |
|----------------------|--------------------------|----------------------------------------------|-----|-------------------------|----------------------|------------------------------------------|
| BV210_13185          | <a href="#">AQL43591</a> | hypothetical protein BV210_13185 [Halorie... | CDD | <a href="#">UniProt</a> | <a href="#">Pfam</a> | <a href="#">InterPro</a>                 |
| BV210_13315          | <a href="#">AQL43616</a> | hypothetical protein BV210_13315 [Halorie... | CDD | <a href="#">UniProt</a> | <a href="#">Pfam</a> | <a href="#">InterPro</a>                 |
| BV210_13825          | <a href="#">AQL43716</a> | hypothetical protein BV210_13825 [Halorie... | CDD | <a href="#">UniProt</a> | <a href="#">Pfam</a> | <a href="#">InterPro</a>                 |
| BV210_14240          | <a href="#">AQL43791</a> | hypothetical protein BV210_14240 [Halorie... | CDD | <a href="#">UniProt</a> | <a href="#">Pfam</a> | <a href="#">InterPro</a>                 |
| BV210_14565          | <a href="#">AQL43852</a> | hypothetical protein BV210_14565 [Halorie... | CDD | <a href="#">UniProt</a> | <a href="#">Pfam</a> | <a href="#">InterPro</a>                 |
| BV210_14660          | <a href="#">AQL43870</a> | hypothetical protein BV210_14660 [Halorie... | CDD | <a href="#">UniProt</a> | <a href="#">Pfam</a> | <a href="#">InterPro</a>                 |
| BV210_14670          | <a href="#">AQL43872</a> | hypothetical protein BV210_14670 [Halorie... | CDD | <a href="#">UniProt</a> | <a href="#">Pfam</a> | <a href="#">InterPro</a>                 |
| BV210_15625          | <a href="#">AQL44584</a> | hypothetical protein BV210_15625 [Halorie... | CDD | <a href="#">UniProt</a> | <a href="#">Pfam</a> | <a href="#">InterPro</a>                 |
| BV210_17915          | <a href="#">AQL44642</a> | hypothetical protein BV210_17915 (plasmid... | CDD | <a href="#">UniProt</a> | <a href="#">Pfam</a> | <a href="#">InterPro</a>                 |
| BV210_18265          | <a href="#">AQL44701</a> | hypothetical protein BV210_18265 (plasmid... | CDD | <a href="#">UniProt</a> | <a href="#">Pfam</a> | <a href="#">InterPro</a>                 |
| <b>REC only</b>      |                          |                                              |     |                         |                      |                                          |
| BV210_10385          | <a href="#">AQL43096</a> | response regulator [Halorientalis sp. IM1... | CDD | <a href="#">UniProt</a> | <a href="#">Pfam</a> | <a href="#">InterPro</a>                 |
| BV210_17890          | <a href="#">AQL44639</a> | hypothetical protein BV210_17890 (plasmid... | CDD | <a href="#">UniProt</a> | <a href="#">Pfam</a> | <a href="#">InterPro</a>                 |
| BV210_01025          | <a href="#">AQL41382</a> | two-component system response regulator [... | CDD | <a href="#">UniProt</a> | <a href="#">Pfam</a> | <a href="#">InterPro</a>                 |
| <b>REC-HisK</b>      |                          |                                              |     |                         |                      |                                          |
| BV210_00825          | <a href="#">AQL41345</a> | hybrid sensor histidine kinase/response r... | CDD | <a href="#">UniProt</a> | <a href="#">Pfam</a> | <a href="#">InterPro</a>                 |
| BV210_01030          | <a href="#">AQL41383</a> | hypothetical protein BV210_01030 [Halorie... | CDD | <a href="#">UniProt</a> | <a href="#">Pfam</a> | <a href="#">InterPro</a>                 |
| BV210_01800          | <a href="#">AQL41523</a> | hypothetical protein BV210_01800 [Halorie... | CDD | <a href="#">UniProt</a> | <a href="#">Pfam</a> | <a href="#">InterPro</a>                 |
| BV210_03535          | <a href="#">AQL41843</a> | hypothetical protein BV210_03535 [Halorie... | CDD | <a href="#">UniProt</a> | <a href="#">Pfam</a> | <a href="#">InterPro</a>                 |
| BV210_08710          | <a href="#">AQL42785</a> | hypothetical protein BV210_08710 [Halorie... | CDD | <a href="#">UniProt</a> | <a href="#">Pfam</a> | <a href="#">InterPro</a>                 |
| BV210_13280          | <a href="#">AQL43610</a> | hypothetical protein BV210_13280 [Halorie... | CDD | <a href="#">UniProt</a> | <a href="#">Pfam</a> | <a href="#">InterPro</a>                 |
| BV210_13800          | <a href="#">AQL43711</a> | hypothetical protein BV210_13800 [Halorie... | CDD | <a href="#">UniProt</a> | <a href="#">Pfam</a> | <a href="#">InterPro</a>                 |
| BV210_14335          | <a href="#">AQL43809</a> | hypothetical protein BV210_14335 [Halorie... | CDD | <a href="#">UniProt</a> | <a href="#">Pfam</a> | <a href="#">InterPro</a>                 |
| BV210_15870          | <a href="#">AQL44090</a> | hypothetical protein BV210_15870 [Halorie... | CDD | <a href="#">UniProt</a> | <a href="#">Pfam</a> | <a href="#">InterPro</a>                 |
| BV210_16005          | <a href="#">AQL44117</a> | hypothetical protein BV210_16005 [Halorie... | CDD | <a href="#">UniProt</a> | <a href="#">Pfam</a> | <a href="#">InterPro</a>                 |
| BV210_17885          | <a href="#">AQL44638</a> | histidine kinase (plasmid) [Halorientalis... | CDD | <a href="#">UniProt</a> | <a href="#">Pfam</a> | <a href="#">InterPro</a>                 |
| BV210_17970          | <a href="#">AQL44653</a> | hypothetical protein BV210_17970 (plasmid... | CDD | <a href="#">UniProt</a> | <a href="#">Pfam</a> | <a href="#">InterPro</a>                 |
| <b>REC-CheB</b>      |                          |                                              |     |                         |                      |                                          |
| BV210_10345          | <a href="#">AQL43088</a> | chemotaxis response regulator protein-glu... | CDD | <a href="#">UniProt</a> | <a href="#">Pfam</a> | <a href="#">InterPro</a>                 |
| <b>REC-PAS</b>       |                          |                                              |     |                         |                      |                                          |
| BV210_03535          | <a href="#">AQL41843</a> | hypothetical protein BV210_03535 [Halorie... | CDD | <a href="#">UniProt</a> | <a href="#">Pfam</a> | <a href="#">InterPro</a>                 |
| BV210_09375          | <a href="#">AQL42912</a> | hypothetical protein BV210_09375 [Halorie... | CDD | <a href="#">UniProt</a> | <a href="#">Pfam</a> | <a href="#">InterPro</a>                 |
| BV210_14340          | <a href="#">AQL43810</a> | hypothetical protein BV210_14340 [Halorie... | CDD | <a href="#">UniProt</a> | <a href="#">Pfam</a> | <a href="#">InterPro</a>                 |
| <b>REC-HalX</b>      |                          |                                              |     |                         |                      |                                          |
| BV210_00205          | <a href="#">AQL44418</a> | HoxA transcriptional regulator [Halorient... | CDD | <a href="#">UniProt</a> | <a href="#">Pfam</a> | <a href="#">InterPro</a>                 |
| BV210_01670          | <a href="#">AQL41501</a> | hypothetical protein BV210_01670 [Halorie... | CDD | <a href="#">UniProt</a> | <a href="#">Pfam</a> | <a href="#">InterPro</a>                 |
| BV210_12200          | <a href="#">AQL43406</a> | DNA-binding protein [Halorientalis sp. IM... | CDD | <a href="#">UniProt</a> | <a href="#">Pfam</a> | <a href="#">InterPro</a>                 |
| BV210_12205          | <a href="#">AQL43407</a> | hypothetical protein BV210_12205 [Halorie... | CDD | <a href="#">UniProt</a> | <a href="#">Pfam</a> | <a href="#">InterPro</a>                 |
| BV210_12410          | <a href="#">AQL43442</a> | response regulator [Halorientalis sp. IM1... | CDD | <a href="#">UniProt</a> | <a href="#">Pfam</a> | <a href="#">InterPro</a>                 |
| BV210_13180          | <a href="#">AQL43590</a> | response regulator [Halorientalis sp. IM1... | CDD | <a href="#">UniProt</a> | <a href="#">Pfam</a> | <a href="#">InterPro</a>                 |
| BV210_14620          | <a href="#">AQL43862</a> | DNA-binding protein [Halorientalis sp. IM... | CDD | <a href="#">UniProt</a> | <a href="#">Pfam</a> | <a href="#">InterPro</a>                 |
| <b>BAT</b>           |                          |                                              |     |                         |                      |                                          |
| BV210_00260          | <a href="#">AQL41236</a> | hypothetical protein BV210_00260 [Halorie... | CDD | <a href="#">UniProt</a> | <a href="#">Pfam</a> | <a href="#">InterPro</a>                 |
| BV210_01770          | <a href="#">AQL41517</a> | bacterio-opsin activator [Halorientalis s... | CDD | <a href="#">UniProt</a> | <a href="#">Pfam</a> | <a href="#">InterPro</a>                 |
| <b>HxlR-REC-HalX</b> |                          |                                              |     |                         |                      |                                          |
| BV210_17895          | <a href="#">AQL44640</a> | HoxA transcriptional regulator (plasmid) ... | CDD | <a href="#">UniProt</a> | <a href="#">Pfam</a> | <a href="#">InterPro</a> (wHTH-REC-HalX) |
| <b>REC-HalOD2</b>    |                          |                                              |     |                         |                      |                                          |
| BV210_03540          | <a href="#">AQL41844</a> | hypothetical protein BV210_03540 [Halorie... | CDD | <a href="#">UniProt</a> | <a href="#">Pfam</a> | <a href="#">InterPro</a> (REC-HalOD2)    |

### Halorubrum lacusprofundi ATCC 49239

#### HisK, no REC

|           |                          |                                               |     |                         |                      |                          |
|-----------|--------------------------|-----------------------------------------------|-----|-------------------------|----------------------|--------------------------|
| Hlac_0258 | <a href="#">ACM55863</a> | PAS/PAC sensor signal transduction histidi... | CDD | <a href="#">UniProt</a> | <a href="#">Pfam</a> | <a href="#">InterPro</a> |
| Hlac_0318 | <a href="#">ACM55922</a> | putative PAS/PAC sensor protein [Halorubru... | CDD | <a href="#">UniProt</a> | <a href="#">Pfam</a> | <a href="#">InterPro</a> |
| Hlac_0469 | <a href="#">ACM56071</a> | PAS/PAC sensor signal transduction histidi... | CDD | <a href="#">UniProt</a> | <a href="#">Pfam</a> | <a href="#">InterPro</a> |
| Hlac_0718 | <a href="#">ACM56320</a> | PAS/PAC sensor signal transduction histidi... | CDD | <a href="#">UniProt</a> | <a href="#">Pfam</a> | <a href="#">InterPro</a> |
| Hlac_0919 | <a href="#">ACM56517</a> | GAF sensor signal transduction histidine k... | CDD | <a href="#">UniProt</a> | <a href="#">Pfam</a> | <a href="#">InterPro</a> |
| Hlac_0920 | <a href="#">ACM56518</a> | multi-sensor signal transduction histidine... | CDD | <a href="#">UniProt</a> | <a href="#">Pfam</a> | <a href="#">InterPro</a> |
| Hlac_1000 | <a href="#">ACM56597</a> | histidine kinase [Halorubrum lacusprofundi... | CDD | <a href="#">UniProt</a> | <a href="#">Pfam</a> | <a href="#">InterPro</a> |
| Hlac_1231 | <a href="#">ACM56823</a> | histidine kinase [Halorubrum lacusprofundi... | CDD | <a href="#">UniProt</a> | <a href="#">Pfam</a> | <a href="#">InterPro</a> |
| Hlac_1440 | <a href="#">ACM57028</a> | PAS/PAC sensor signal transduction histidi... | CDD | <a href="#">UniProt</a> | <a href="#">Pfam</a> | <a href="#">InterPro</a> |
| Hlac_1519 | <a href="#">ACM57107</a> | histidine kinase [Halorubrum lacusprofundi... | CDD | <a href="#">UniProt</a> | <a href="#">Pfam</a> | <a href="#">InterPro</a> |
| Hlac_1704 | <a href="#">ACM57288</a> | histidine kinase [Halorubrum lacusprofundi... | CDD | <a href="#">UniProt</a> | <a href="#">Pfam</a> | <a href="#">InterPro</a> |
| Hlac_1800 | <a href="#">ACM57379</a> | histidine kinase [Halorubrum lacusprofundi... | CDD | <a href="#">UniProt</a> | <a href="#">Pfam</a> | <a href="#">InterPro</a> |
| Hlac_1809 | <a href="#">ACM57388</a> | histidine kinase [Halorubrum lacusprofundi... | CDD | <a href="#">UniProt</a> | <a href="#">Pfam</a> | <a href="#">InterPro</a> |
| Hlac_1908 | <a href="#">ACM57486</a> | multi-sensor signal transduction histidine... | CDD | <a href="#">UniProt</a> | <a href="#">Pfam</a> | <a href="#">InterPro</a> |
| Hlac_1946 | <a href="#">ACM57524</a> | PAS/PAC sensor signal transduction histidi... | CDD | <a href="#">UniProt</a> | <a href="#">Pfam</a> | <a href="#">InterPro</a> |
| Hlac_2051 | <a href="#">ACM57629</a> | PAS/PAC sensor signal transduction histidi... | CDD | <a href="#">UniProt</a> | <a href="#">Pfam</a> | <a href="#">InterPro</a> |
| Hlac_2126 | <a href="#">ACM57703</a> | PAS/PAC sensor signal transduction histidi... | CDD | <a href="#">UniProt</a> | <a href="#">Pfam</a> | <a href="#">InterPro</a> |
| Hlac_2158 | <a href="#">ACM57735</a> | histidine kinase [Halorubrum lacusprofundi... | CDD | <a href="#">UniProt</a> | <a href="#">Pfam</a> | <a href="#">InterPro</a> |
| Hlac_2263 | <a href="#">ACM57839</a> | CheA signal transduction histidine kinase ... | CDD | <a href="#">UniProt</a> | <a href="#">Pfam</a> | <a href="#">InterPro</a> |
| Hlac_2389 | <a href="#">ACM57964</a> | histidine kinase [Halorubrum lacusprofundi... | CDD | <a href="#">UniProt</a> | <a href="#">Pfam</a> | <a href="#">InterPro</a> |
| Hlac_2596 | <a href="#">ACM58168</a> | PAS/PAC sensor signal transduction histidi... | CDD | <a href="#">UniProt</a> | <a href="#">Pfam</a> | <a href="#">InterPro</a> |
| Hlac_2652 | <a href="#">ACM58223</a> | signal transduction histidine kinase regul... | CDD | <a href="#">UniProt</a> | <a href="#">Pfam</a> | <a href="#">InterPro</a> |
| Hlac_2684 | <a href="#">ACM58255</a> | PAS/PAC sensor signal transduction histidi... | CDD | <a href="#">UniProt</a> | <a href="#">Pfam</a> | <a href="#">InterPro</a> |
| Hlac_2889 | <a href="#">ACM58447</a> | histidine kinase [Halorubrum lacusprofundi... | CDD | <a href="#">UniProt</a> | <a href="#">Pfam</a> | <a href="#">InterPro</a> |
| Hlac_3302 | <a href="#">ACM58826</a> | histidine kinase (plasmid) [Halorubrum lac... | CDD | <a href="#">UniProt</a> | <a href="#">Pfam</a> | <a href="#">InterPro</a> |
| Hlac_3597 | <a href="#">ACM59104</a> | PAS/PAC sensor signal transduction histidi... | CDD | <a href="#">UniProt</a> | <a href="#">Pfam</a> | <a href="#">InterPro</a> |
| Hlac_3605 | <a href="#">ACM59111</a> | PAS/PAC sensor signal transduction histidi... | CDD | <a href="#">UniProt</a> | <a href="#">Pfam</a> | <a href="#">InterPro</a> |

|                 |                          |                                               |     |                         |                      |                          |
|-----------------|--------------------------|-----------------------------------------------|-----|-------------------------|----------------------|--------------------------|
| Hlac_3606       | <a href="#">ACM59112</a> | histidine kinase (plasmid) [Halorubrum lac... | CDD | <a href="#">UniProt</a> | <a href="#">Pfam</a> | <a href="#">InterPro</a> |
| Hlac_3654       | <a href="#">ACM59156</a> | PAS/PAC sensor signal transduction histidi... | CDD | <a href="#">UniProt</a> | <a href="#">Pfam</a> | <a href="#">InterPro</a> |
| Hlac_3655       | <a href="#">ACM59157</a> | PAS/PAC sensor signal transduction histidi... | CDD | <a href="#">UniProt</a> | <a href="#">Pfam</a> | <a href="#">InterPro</a> |
| Hlac_3657       | <a href="#">ACM59159</a> | PAS/PAC sensor signal transduction histidi... | CDD | <a href="#">UniProt</a> | <a href="#">Pfam</a> | <a href="#">InterPro</a> |
| Hlac_3664       | <a href="#">ACM59164</a> | PAS/PAC sensor signal transduction histidi... | CDD | <a href="#">UniProt</a> | <a href="#">Pfam</a> | <a href="#">InterPro</a> |
| <b>REC only</b> |                          |                                               |     |                         |                      |                          |
| Hlac_0694       | <a href="#">ACM56296</a> | response regulator receiver protein [Halor... | CDD | <a href="#">UniProt</a> | <a href="#">Pfam</a> | <a href="#">InterPro</a> |
| Hlac_2561       | <a href="#">ACM58133</a> | response regulator receiver protein [Halor... | CDD | <a href="#">UniProt</a> | <a href="#">Pfam</a> | <a href="#">InterPro</a> |
| <b>REC-HisK</b> |                          |                                               |     |                         |                      |                          |
| Hlac_1004       | <a href="#">ACM56601</a> | multi-sensor signal transduction histidine... | CDD | <a href="#">UniProt</a> | <a href="#">Pfam</a> | <a href="#">InterPro</a> |
| Hlac_1349       | <a href="#">ACM56941</a> | multi-sensor signal transduction histidine... | CDD | <a href="#">UniProt</a> | <a href="#">Pfam</a> | <a href="#">InterPro</a> |
| <b>REC-CheB</b> |                          |                                               |     |                         |                      |                          |
| Hlac_2262       | <a href="#">ACM57838</a> | response regulator receiver modulated CheB... | CDD | <a href="#">UniProt</a> | <a href="#">Pfam</a> | <a href="#">InterPro</a> |
| <b>REC-HalX</b> |                          |                                               |     |                         |                      |                          |
| Hlac_1208       | <a href="#">ACM56802</a> | response regulator receiver protein [Halor... | CDD | <a href="#">UniProt</a> | <a href="#">Pfam</a> | <a href="#">InterPro</a> |
| Hlac_2012       | <a href="#">ACM57590</a> | response regulator receiver protein [Halor... | CDD | <a href="#">UniProt</a> | <a href="#">Pfam</a> | <a href="#">InterPro</a> |
| Hlac_2553       | <a href="#">ACM58125</a> | response regulator receiver protein [Halor... | CDD | <a href="#">UniProt</a> | <a href="#">Pfam</a> | <a href="#">InterPro</a> |
| <b>BAT</b>      |                          |                                               |     |                         |                      |                          |
| Hlac_3274       | <a href="#">ACM58800</a> | response regulator receiver protein (plasm... | CDD | <a href="#">UniProt</a> | <a href="#">Pfam</a> | <a href="#">InterPro</a> |

### Halostagnicola larsenii XH-48

#### **HisK, no REC**

|             |                          |                                              |     |                         |                      |                          |
|-------------|--------------------------|----------------------------------------------|-----|-------------------------|----------------------|--------------------------|
| HALLA_00410 | <a href="#">AHG01785</a> | hypothetical protein HALLA_00410 (plasmid... | CDD | <a href="#">UniProt</a> | <a href="#">Pfam</a> | <a href="#">InterPro</a> |
| HALLA_01675 | <a href="#">AHG02037</a> | hypothetical protein HALLA_01675 (plasmid... | CDD | <a href="#">UniProt</a> | <a href="#">Pfam</a> | <a href="#">InterPro</a> |
| HALLA_07140 | <a href="#">AHF98659</a> | histidine kinase [Halostagnicola larsenii... | CDD | <a href="#">UniProt</a> | <a href="#">Pfam</a> | <a href="#">InterPro</a> |
| HALLA_08845 | <a href="#">AHF98957</a> | histidine kinase [Halostagnicola larsenii... | CDD | <a href="#">UniProt</a> | <a href="#">Pfam</a> | <a href="#">InterPro</a> |
| HALLA_10825 | <a href="#">AHF99276</a> | histidine kinase [Halostagnicola larsenii... | CDD | <a href="#">UniProt</a> | <a href="#">Pfam</a> | <a href="#">InterPro</a> |
| HALLA_11420 | <a href="#">AHF99383</a> | histidine kinase [Halostagnicola larsenii... | CDD | <a href="#">UniProt</a> | <a href="#">Pfam</a> | <a href="#">InterPro</a> |
| HALLA_13025 | <a href="#">AHF99575</a> | histidine kinase [Halostagnicola larsenii... | CDD | <a href="#">UniProt</a> | <a href="#">Pfam</a> | <a href="#">InterPro</a> |
| HALLA_13485 | <a href="#">AHF99643</a> | histidine kinase [Halostagnicola larsenii... | CDD | <a href="#">UniProt</a> | <a href="#">Pfam</a> | <a href="#">InterPro</a> |
| HALLA_14880 | <a href="#">AHF99883</a> | histidine kinase [Halostagnicola larsenii... | CDD | <a href="#">UniProt</a> | <a href="#">Pfam</a> | <a href="#">InterPro</a> |
| HALLA_16575 | <a href="#">AHG00173</a> | chemotaxis protein CheA [Halostagnicola l... | CDD | <a href="#">UniProt</a> | <a href="#">Pfam</a> | <a href="#">InterPro</a> |
| HALLA_19755 | <a href="#">AHG00692</a> | histidine kinase [Halostagnicola larsenii... | CDD | <a href="#">UniProt</a> | <a href="#">Pfam</a> | <a href="#">InterPro</a> |

#### **REC only**

|             |                          |                                              |     |                         |                      |                          |
|-------------|--------------------------|----------------------------------------------|-----|-------------------------|----------------------|--------------------------|
| HALLA_00975 | <a href="#">AHG01898</a> | chemotaxis protein CheY (plasmid) [Halost... | CDD | <a href="#">UniProt</a> | <a href="#">Pfam</a> | <a href="#">InterPro</a> |
| HALLA_07145 | <a href="#">AHF98660</a> | chemotaxis protein CheY [Halostagnicola l... | CDD | <a href="#">UniProt</a> | <a href="#">Pfam</a> | <a href="#">InterPro</a> |
| HALLA_09815 | <a href="#">AHF99097</a> | DNA-binding protein [Halostagnicola larse... | CDD | <a href="#">UniProt</a> | <a href="#">Pfam</a> | <a href="#">InterPro</a> |
| HALLA_13235 | <a href="#">AHF99612</a> | chemotaxis protein CheY [Halostagnicola l... | CDD | <a href="#">UniProt</a> | <a href="#">Pfam</a> | <a href="#">InterPro</a> |
| HALLA_16190 | <a href="#">AHG00109</a> | chemotaxis protein CheY [Halostagnicola l... | CDD | <a href="#">UniProt</a> | <a href="#">Pfam</a> | <a href="#">InterPro</a> |
| HALLA_18040 | <a href="#">AHG00415</a> | chemotaxis protein CheY [Halostagnicola l... | CDD | <a href="#">UniProt</a> | <a href="#">Pfam</a> | <a href="#">InterPro</a> |
| HALLA_20920 | <a href="#">AHG02369</a> | histidine kinase (plasmid) [Halostagnicol... | CDD | <a href="#">UniProt</a> | <a href="#">Pfam</a> | <a href="#">InterPro</a> |

#### **REC-HisK**

|             |                          |                                              |     |                         |                      |                          |
|-------------|--------------------------|----------------------------------------------|-----|-------------------------|----------------------|--------------------------|
| HALLA_15625 | <a href="#">AHG01075</a> | hypothetical protein HALLA_15625 [Halosta... | CDD | <a href="#">UniProt</a> | <a href="#">Pfam</a> | <a href="#">InterPro</a> |
| HALLA_20480 | <a href="#">AHG02281</a> | hypothetical protein HALLA_20480 (plasmid... | CDD | <a href="#">UniProt</a> | <a href="#">Pfam</a> | <a href="#">InterPro</a> |

#### **REC-CheB**

|             |                          |                                              |     |                         |                      |                          |
|-------------|--------------------------|----------------------------------------------|-----|-------------------------|----------------------|--------------------------|
| HALLA_16560 | <a href="#">AHG00171</a> | chemotaxis protein [Halostagnicola larsen... | CDD | <a href="#">UniProt</a> | <a href="#">Pfam</a> | <a href="#">InterPro</a> |
|-------------|--------------------------|----------------------------------------------|-----|-------------------------|----------------------|--------------------------|

#### **REC-HalX**

|             |                          |                                              |     |                         |                      |                          |
|-------------|--------------------------|----------------------------------------------|-----|-------------------------|----------------------|--------------------------|
| HALLA_02410 | <a href="#">AHG01250</a> | hypothetical protein HALLA_02410 (plasmid... | CDD | <a href="#">UniProt</a> | <a href="#">Pfam</a> | <a href="#">InterPro</a> |
|-------------|--------------------------|----------------------------------------------|-----|-------------------------|----------------------|--------------------------|

#### **BAT**

|             |                          |                                              |     |                         |                      |                          |
|-------------|--------------------------|----------------------------------------------|-----|-------------------------|----------------------|--------------------------|
| HALLA_00405 | <a href="#">AHG01784</a> | hypothetical protein HALLA_00405 (plasmid... | CDD | <a href="#">UniProt</a> | <a href="#">Pfam</a> | <a href="#">InterPro</a> |
| HALLA_07150 | <a href="#">AHF98661</a> | diguanylate cyclase [Halostagnicola larse... | CDD | <a href="#">UniProt</a> | <a href="#">Pfam</a> | <a href="#">InterPro</a> |
| HALLA_15955 | <a href="#">AHG00073</a> | bacterio-opsin activator [Halostagnicola ... | CDD | <a href="#">UniProt</a> | <a href="#">Pfam</a> | <a href="#">InterPro</a> |

#### **Other RRs**

|             |                          |                                              |     |                         |                      |                                     |
|-------------|--------------------------|----------------------------------------------|-----|-------------------------|----------------------|-------------------------------------|
| HALLA_02415 | <a href="#">AHG01251</a> | hypothetical protein HALLA_02415 (plasmid... | CDD | <a href="#">UniProt</a> | <a href="#">Pfam</a> | <a href="#">InterPro</a> (REC-KaiC) |
|-------------|--------------------------|----------------------------------------------|-----|-------------------------|----------------------|-------------------------------------|

### Haloterrigena daqingensis

#### **HisK, no REC**

|             |                          |                                              |     |                         |                      |                          |
|-------------|--------------------------|----------------------------------------------|-----|-------------------------|----------------------|--------------------------|
| BB347_00640 | <a href="#">APX95228</a> | histidine kinase [Haloterrigena daqingens... | CDD | <a href="#">UniProt</a> | <a href="#">Pfam</a> | <a href="#">InterPro</a> |
| BB347_01435 | <a href="#">APX95380</a> | histidine kinase [Haloterrigena daqingens... | CDD | <a href="#">UniProt</a> | <a href="#">Pfam</a> | <a href="#">InterPro</a> |
| BB347_02130 | <a href="#">APX95506</a> | histidine kinase [Haloterrigena daqingens... | CDD | <a href="#">UniProt</a> | <a href="#">Pfam</a> | <a href="#">InterPro</a> |
| BB347_02240 | <a href="#">APX95526</a> | histidine kinase [Haloterrigena daqingens... | CDD | <a href="#">UniProt</a> | <a href="#">Pfam</a> | <a href="#">InterPro</a> |
| BB347_02910 | <a href="#">APX95646</a> | two-component sensor histidine kinase [Ha... | CDD | <a href="#">UniProt</a> | <a href="#">Pfam</a> | <a href="#">InterPro</a> |
| BB347_03165 | <a href="#">APX95695</a> | histidine kinase [Haloterrigena daqingens... | CDD | <a href="#">UniProt</a> | <a href="#">Pfam</a> | <a href="#">InterPro</a> |
| BB347_03520 | <a href="#">APX95757</a> | histidine kinase [Haloterrigena daqingens... | CDD | <a href="#">UniProt</a> | <a href="#">Pfam</a> | <a href="#">InterPro</a> |
| BB347_03870 | <a href="#">APX95824</a> | histidine kinase [Haloterrigena daqingens... | CDD | <a href="#">UniProt</a> | <a href="#">Pfam</a> | <a href="#">InterPro</a> |
| BB347_04065 | <a href="#">APX95859</a> | histidine kinase [Haloterrigena daqingens... | CDD | <a href="#">UniProt</a> | <a href="#">Pfam</a> | <a href="#">InterPro</a> |
| BB347_09065 | <a href="#">APX96754</a> | histidine kinase [Haloterrigena daqingens... | CDD | <a href="#">UniProt</a> | <a href="#">Pfam</a> | <a href="#">InterPro</a> |
| BB347_14305 | <a href="#">APX97690</a> | histidine kinase [Haloterrigena daqingens... | CDD | <a href="#">UniProt</a> | <a href="#">Pfam</a> | <a href="#">InterPro</a> |
| BB347_16020 | <a href="#">APX97995</a> | two-component sensor histidine kinase [Ha... | CDD | <a href="#">UniProt</a> | <a href="#">Pfam</a> | <a href="#">InterPro</a> |
| BB347_16315 | <a href="#">APX98051</a> | PAS domain-containing sensor histidine ki... | CDD | <a href="#">UniProt</a> | <a href="#">Pfam</a> | <a href="#">InterPro</a> |
| BB347_06115 | <a href="#">APX98154</a> | PAS domain-containing sensor histidine ki... | CDD | <a href="#">UniProt</a> | <a href="#">Pfam</a> | <a href="#">InterPro</a> |
| BB347_16855 | <a href="#">APX98378</a> | histidine kinase (plasmid) [Haloterrigena... | CDD | <a href="#">UniProt</a> | <a href="#">Pfam</a> | <a href="#">InterPro</a> |

#### **REC only**

|             |                          |                                              |     |                         |                      |                          |
|-------------|--------------------------|----------------------------------------------|-----|-------------------------|----------------------|--------------------------|
| BB347_00645 | <a href="#">APX95229</a> | two-component system response regulator [... | CDD | <a href="#">UniProt</a> | <a href="#">Pfam</a> | <a href="#">InterPro</a> |
| BB347_00805 | <a href="#">APX95260</a> | response regulator [Haloterrigena daqinge... | CDD | <a href="#">UniProt</a> | <a href="#">Pfam</a> | <a href="#">InterPro</a> |
| BB347_01860 | <a href="#">APX95458</a> | response regulator [Haloterrigena daqinge... | CDD | <a href="#">UniProt</a> | <a href="#">Pfam</a> | <a href="#">InterPro</a> |
| BB347_04595 | <a href="#">APX95954</a> | response regulator [Haloterrigena daqinge... | CDD | <a href="#">UniProt</a> | <a href="#">Pfam</a> | <a href="#">InterPro</a> |

|                 |                          |                                              |                     |                         |                      |                          |
|-----------------|--------------------------|----------------------------------------------|---------------------|-------------------------|----------------------|--------------------------|
| BB347_05765     | <a href="#">APX98152</a> | response regulator [Haloterrigena daqinge... | <a href="#">CDD</a> | <a href="#">UniProt</a> | <a href="#">Pfam</a> | <a href="#">InterPro</a> |
| BB347_06110     | <a href="#">APX96233</a> | response regulator [Haloterrigena daqinge... | <a href="#">CDD</a> | <a href="#">UniProt</a> | <a href="#">Pfam</a> | <a href="#">InterPro</a> |
| BB347_16815     | <a href="#">APX98370</a> | response regulator (plasmid) [Haloterrige... | <a href="#">CDD</a> | <a href="#">UniProt</a> | <a href="#">Pfam</a> | <a href="#">InterPro</a> |
| <b>REC-HisK</b> |                          |                                              |                     |                         |                      |                          |
| BB347_00005     | <a href="#">APX95111</a> | hybrid sensor histidine kinase/response r... | <a href="#">CDD</a> | <a href="#">UniProt</a> | <a href="#">Pfam</a> | <a href="#">InterPro</a> |
| <b>REC-CheB</b> |                          |                                              |                     |                         |                      |                          |
| BB347_01855     | <a href="#">APX95457</a> | chemotaxis response regulator protein-glu... | <a href="#">CDD</a> | <a href="#">UniProt</a> | <a href="#">Pfam</a> | <a href="#">InterPro</a> |
| <b>REC-HalX</b> |                          |                                              |                     |                         |                      |                          |
| BB347_03875     | <a href="#">APX95825</a> | DNA-binding protein [Haloterrigena daqing... | <a href="#">CDD</a> | <a href="#">UniProt</a> | <a href="#">Pfam</a> | <a href="#">InterPro</a> |
| BB347_00960     | <a href="#">APX95290</a> | HoxA transcriptional regulator [Haloterr...  | <a href="#">CDD</a> | <a href="#">UniProt</a> | <a href="#">Pfam</a> | <a href="#">InterPro</a> |
| <b>BAT</b>      |                          |                                              |                     |                         |                      |                          |
| BB347_00650     | <a href="#">APX95230</a> | diguanylate cyclase [Haloterrigena daqing... | <a href="#">CDD</a> | <a href="#">UniProt</a> | <a href="#">Pfam</a> | <a href="#">InterPro</a> |
| BB347_09670     | <a href="#">APX96866</a> | bacterio-opsin activator [Haloterrigena d... | <a href="#">CDD</a> | <a href="#">UniProt</a> | <a href="#">Pfam</a> | <a href="#">InterPro</a> |
| BB347_12125     | <a href="#">APX97299</a> | diguanylate cyclase [Haloterrigena daqing... | <a href="#">CDD</a> | <a href="#">UniProt</a> | <a href="#">Pfam</a> | <a href="#">InterPro</a> |
| BB347_16770     | <a href="#">APX98361</a> | histidine kinase (plasmid) [Haloterrigena... | <a href="#">CDD</a> | <a href="#">UniProt</a> | <a href="#">Pfam</a> | <a href="#">InterPro</a> |
| BB347_17085     | <a href="#">APX98421</a> | hypothetical protein BB347_17085 (plasmid... | <a href="#">CDD</a> | <a href="#">UniProt</a> | <a href="#">Pfam</a> | <a href="#">InterPro</a> |

### Haloterrigena turkmenica DSM 5511

#### **HisK, no REC**

|                 |                          |                                               |                     |                         |                      |                          |
|-----------------|--------------------------|-----------------------------------------------|---------------------|-------------------------|----------------------|--------------------------|
| Htur_0183       | <a href="#">ADB59084</a> | integral membrane sensor signal transducti... | <a href="#">CDD</a> | <a href="#">UniProt</a> | <a href="#">Pfam</a> | <a href="#">InterPro</a> |
| Htur_0209       | <a href="#">ADB59110</a> | multi-sensor signal transduction histidine... | <a href="#">CDD</a> | <a href="#">UniProt</a> | <a href="#">Pfam</a> | <a href="#">InterPro</a> |
| Htur_0255       | <a href="#">ADB59156</a> | multi-sensor signal transduction histidine... | <a href="#">CDD</a> | <a href="#">UniProt</a> | <a href="#">Pfam</a> | <a href="#">InterPro</a> |
| Htur_0270       | <a href="#">ADB59171</a> | PAS/PAC sensor signal transduction histidi... | <a href="#">CDD</a> | <a href="#">UniProt</a> | <a href="#">Pfam</a> | <a href="#">InterPro</a> |
| Htur_0375       | <a href="#">ADB59275</a> | integral membrane sensor signal transducti... | <a href="#">CDD</a> | <a href="#">UniProt</a> | <a href="#">Pfam</a> | <a href="#">InterPro</a> |
| Htur_0519       | <a href="#">ADB59417</a> | multi-sensor signal transduction histidine... | <a href="#">CDD</a> | <a href="#">UniProt</a> | <a href="#">Pfam</a> | <a href="#">InterPro</a> |
| Htur_0546       | <a href="#">ADB59444</a> | integral membrane sensor signal transducti... | <a href="#">CDD</a> | <a href="#">UniProt</a> | <a href="#">Pfam</a> | <a href="#">InterPro</a> |
| Htur_0906       | <a href="#">ADB59801</a> | multi-sensor signal transduction histidine... | <a href="#">CDD</a> | <a href="#">UniProt</a> | <a href="#">Pfam</a> | <a href="#">InterPro</a> |
| Htur_0958       | <a href="#">ADB59852</a> | CheA signal transduction histidine kinase ... | <a href="#">CDD</a> | <a href="#">UniProt</a> | <a href="#">Pfam</a> | <a href="#">InterPro</a> |
| Htur_0970       | <a href="#">ADB59864</a> | multi-sensor signal transduction histidine... | <a href="#">CDD</a> | <a href="#">UniProt</a> | <a href="#">Pfam</a> | <a href="#">InterPro</a> |
| Htur_1021       | <a href="#">ADB59913</a> | multi-sensor signal transduction histidine... | <a href="#">CDD</a> | <a href="#">UniProt</a> | <a href="#">Pfam</a> | <a href="#">InterPro</a> |
| Htur_1080       | <a href="#">ADB59972</a> | GAF sensor signal transduction histidine k... | <a href="#">CDD</a> | <a href="#">UniProt</a> | <a href="#">Pfam</a> | <a href="#">InterPro</a> |
| Htur_1083       | <a href="#">ADB59975</a> | GAF sensor signal transduction histidine k... | <a href="#">CDD</a> | <a href="#">UniProt</a> | <a href="#">Pfam</a> | <a href="#">InterPro</a> |
| Htur_1263       | <a href="#">ADB60153</a> | histidine kinase [Haloterrigena turkmenica... | <a href="#">CDD</a> | <a href="#">UniProt</a> | <a href="#">Pfam</a> | <a href="#">InterPro</a> |
| Htur_1265       | <a href="#">ADB60155</a> | integral membrane sensor signal transducti... | <a href="#">CDD</a> | <a href="#">UniProt</a> | <a href="#">Pfam</a> | <a href="#">InterPro</a> |
| Htur_1537       | <a href="#">ADB60423</a> | putative PAS/PAC sensor protein [Haloterr...  | <a href="#">CDD</a> | <a href="#">UniProt</a> | <a href="#">Pfam</a> | <a href="#">InterPro</a> |
| Htur_1725       | <a href="#">ADB60610</a> | integral membrane sensor signal transducti... | <a href="#">CDD</a> | <a href="#">UniProt</a> | <a href="#">Pfam</a> | <a href="#">InterPro</a> |
| Htur_1881       | <a href="#">ADB60766</a> | multi-sensor signal transduction histidine... | <a href="#">CDD</a> | <a href="#">UniProt</a> | <a href="#">Pfam</a> | <a href="#">InterPro</a> |
| Htur_1974       | <a href="#">ADB60858</a> | multi-sensor signal transduction histidine... | <a href="#">CDD</a> | <a href="#">UniProt</a> | <a href="#">Pfam</a> | <a href="#">InterPro</a> |
| Htur_2049       | <a href="#">ADB60933</a> | histidine kinase [Haloterrigena turkmenica... | <a href="#">CDD</a> | <a href="#">UniProt</a> | <a href="#">Pfam</a> | <a href="#">InterPro</a> |
| Htur_2215       | <a href="#">ADB61095</a> | PAS/PAC sensor signal transduction histidi... | <a href="#">CDD</a> | <a href="#">UniProt</a> | <a href="#">Pfam</a> | <a href="#">InterPro</a> |
| Htur_2280       | <a href="#">ADB61160</a> | PAS/PAC sensor signal transduction histidi... | <a href="#">CDD</a> | <a href="#">UniProt</a> | <a href="#">Pfam</a> | <a href="#">InterPro</a> |
| Htur_2292       | <a href="#">ADB61172</a> | multi-sensor signal transduction histidine... | <a href="#">CDD</a> | <a href="#">UniProt</a> | <a href="#">Pfam</a> | <a href="#">InterPro</a> |
| Htur_2359       | <a href="#">ADB61237</a> | PAS/PAC sensor signal transduction histidi... | <a href="#">CDD</a> | <a href="#">UniProt</a> | <a href="#">Pfam</a> | <a href="#">InterPro</a> |
| Htur_2509       | <a href="#">ADB61386</a> | integral membrane sensor signal transducti... | <a href="#">CDD</a> | <a href="#">UniProt</a> | <a href="#">Pfam</a> | <a href="#">InterPro</a> |
| Htur_2519       | <a href="#">ADB61396</a> | multi-sensor signal transduction histidine... | <a href="#">CDD</a> | <a href="#">UniProt</a> | <a href="#">Pfam</a> | <a href="#">InterPro</a> |
| Htur_2594       | <a href="#">ADB61471</a> | multi-sensor signal transduction histidine... | <a href="#">CDD</a> | <a href="#">UniProt</a> | <a href="#">Pfam</a> | <a href="#">InterPro</a> |
| Htur_2774       | <a href="#">ADB61647</a> | multi-sensor signal transduction histidine... | <a href="#">CDD</a> | <a href="#">UniProt</a> | <a href="#">Pfam</a> | <a href="#">InterPro</a> |
| Htur_2820       | <a href="#">ADB61691</a> | histidine kinase [Haloterrigena turkmenica... | <a href="#">CDD</a> | <a href="#">UniProt</a> | <a href="#">Pfam</a> | <a href="#">InterPro</a> |
| Htur_2827       | <a href="#">ADB61698</a> | multi-sensor signal transduction histidine... | <a href="#">CDD</a> | <a href="#">UniProt</a> | <a href="#">Pfam</a> | <a href="#">InterPro</a> |
| Htur_2907       | <a href="#">ADB61776</a> | multi-sensor signal transduction histidine... | <a href="#">CDD</a> | <a href="#">UniProt</a> | <a href="#">Pfam</a> | <a href="#">InterPro</a> |
| Htur_2911       | <a href="#">ADB61780</a> | multi-sensor signal transduction histidine... | <a href="#">CDD</a> | <a href="#">UniProt</a> | <a href="#">Pfam</a> | <a href="#">InterPro</a> |
| Htur_2936       | <a href="#">ADB61805</a> | multi-sensor signal transduction histidine... | <a href="#">CDD</a> | <a href="#">UniProt</a> | <a href="#">Pfam</a> | <a href="#">InterPro</a> |
| Htur_2998       | <a href="#">ADB61866</a> | integral membrane sensor signal transducti... | <a href="#">CDD</a> | <a href="#">UniProt</a> | <a href="#">Pfam</a> | <a href="#">InterPro</a> |
| Htur_3059       | <a href="#">ADB61925</a> | multi-sensor signal transduction histidine... | <a href="#">CDD</a> | <a href="#">UniProt</a> | <a href="#">Pfam</a> | <a href="#">InterPro</a> |
| Htur_3150       | <a href="#">ADB62015</a> | integral membrane sensor signal transducti... | <a href="#">CDD</a> | <a href="#">UniProt</a> | <a href="#">Pfam</a> | <a href="#">InterPro</a> |
| Htur_3223       | <a href="#">ADB62087</a> | multi-sensor signal transduction histidine... | <a href="#">CDD</a> | <a href="#">UniProt</a> | <a href="#">Pfam</a> | <a href="#">InterPro</a> |
| Htur_3424       | <a href="#">ADB62287</a> | integral membrane sensor signal transducti... | <a href="#">CDD</a> | <a href="#">UniProt</a> | <a href="#">Pfam</a> | <a href="#">InterPro</a> |
| Htur_3436       | <a href="#">ADB62299</a> | histidine kinase [Haloterrigena turkmenica... | <a href="#">CDD</a> | <a href="#">UniProt</a> | <a href="#">Pfam</a> | <a href="#">InterPro</a> |
| Htur_3488       | <a href="#">ADB62350</a> | integral membrane sensor signal transducti... | <a href="#">CDD</a> | <a href="#">UniProt</a> | <a href="#">Pfam</a> | <a href="#">InterPro</a> |
| Htur_3658       | <a href="#">ADB62520</a> | histidine kinase [Haloterrigena turkmenica... | <a href="#">CDD</a> | <a href="#">UniProt</a> | <a href="#">Pfam</a> | <a href="#">InterPro</a> |
| Htur_3966       | <a href="#">ADB62820</a> | PAS/PAC sensor signal transduction histidi... | <a href="#">CDD</a> | <a href="#">UniProt</a> | <a href="#">Pfam</a> | <a href="#">InterPro</a> |
| Htur_4049       | <a href="#">ADB62889</a> | PAS/PAC sensor signal transduction histidi... | <a href="#">CDD</a> | <a href="#">UniProt</a> | <a href="#">Pfam</a> | <a href="#">InterPro</a> |
| Htur_4329       | <a href="#">ADB63144</a> | multi-sensor signal transduction histidine... | <a href="#">CDD</a> | <a href="#">UniProt</a> | <a href="#">Pfam</a> | <a href="#">InterPro</a> |
| Htur_4970       | <a href="#">ADB63704</a> | PAS/PAC sensor signal transduction histidi... | <a href="#">CDD</a> | <a href="#">UniProt</a> | <a href="#">Pfam</a> | <a href="#">InterPro</a> |
| Htur_5232       | <a href="#">ADB63863</a> | multi-sensor signal transduction histidine... | <a href="#">CDD</a> | <a href="#">UniProt</a> | <a href="#">Pfam</a> | <a href="#">InterPro</a> |
| <b>REC only</b> |                          |                                               |                     |                         |                      |                          |
| Htur_0362       | <a href="#">ADB59262</a> | response regulator receiver protein [Halot... | <a href="#">CDD</a> | <a href="#">UniProt</a> | <a href="#">Pfam</a> | <a href="#">InterPro</a> |
| Htur_0517       | <a href="#">ADB59415</a> | response regulator receiver protein [Halot... | <a href="#">CDD</a> | <a href="#">UniProt</a> | <a href="#">Pfam</a> | <a href="#">InterPro</a> |
| Htur_0524       | <a href="#">ADB59422</a> | response regulator receiver protein [Halot... | <a href="#">CDD</a> | <a href="#">UniProt</a> | <a href="#">Pfam</a> | <a href="#">InterPro</a> |
| Htur_0708       | <a href="#">ADB59605</a> | response regulator receiver protein [Halot... | <a href="#">CDD</a> | <a href="#">UniProt</a> | <a href="#">Pfam</a> | <a href="#">InterPro</a> |
| Htur_0749       | <a href="#">ADB59646</a> | response regulator receiver protein [Halot... | <a href="#">CDD</a> | <a href="#">UniProt</a> | <a href="#">Pfam</a> | <a href="#">InterPro</a> |
| Htur_0960       | <a href="#">ADB59854</a> | response regulator receiver protein [Halot... | <a href="#">CDD</a> | <a href="#">UniProt</a> | <a href="#">Pfam</a> | <a href="#">InterPro</a> |
| Htur_1247       | <a href="#">ADB60137</a> | response regulator receiver protein [Halot... | <a href="#">CDD</a> | <a href="#">UniProt</a> | <a href="#">Pfam</a> | <a href="#">InterPro</a> |
| Htur_1743       | <a href="#">ADB60628</a> | response regulator receiver protein [Halot... | <a href="#">CDD</a> | <a href="#">UniProt</a> | <a href="#">Pfam</a> | <a href="#">InterPro</a> |
| Htur_1954       | <a href="#">ADB60839</a> | response regulator receiver protein [Halot... | <a href="#">CDD</a> | <a href="#">UniProt</a> | <a href="#">Pfam</a> | <a href="#">InterPro</a> |
| Htur_2026       | <a href="#">ADB60910</a> | response regulator receiver protein [Halot... | <a href="#">CDD</a> | <a href="#">UniProt</a> | <a href="#">Pfam</a> | <a href="#">InterPro</a> |
| Htur_2120       | <a href="#">ADB61003</a> | response regulator receiver protein [Halot... | <a href="#">CDD</a> | <a href="#">UniProt</a> | <a href="#">Pfam</a> | <a href="#">InterPro</a> |
| Htur_2303       | <a href="#">ADB61183</a> | response regulator receiver protein [Halot... | <a href="#">CDD</a> | <a href="#">UniProt</a> | <a href="#">Pfam</a> | <a href="#">InterPro</a> |

|                 |                          |                                               |     |                         |                      |                          |
|-----------------|--------------------------|-----------------------------------------------|-----|-------------------------|----------------------|--------------------------|
| Htur_3139       | <a href="#">ADB62004</a> | response regulator receiver protein [Halot... | CDD | <a href="#">UniProt</a> | <a href="#">Pfam</a> | <a href="#">InterPro</a> |
| Htur_3985       | <a href="#">ADB62834</a> | response regulator receiver protein [Halot... | CDD | <a href="#">UniProt</a> | <a href="#">Pfam</a> | <a href="#">InterPro</a> |
| Htur_4516       | <a href="#">ADB63324</a> | response regulator receiver protein [Halot... | CDD | <a href="#">UniProt</a> | <a href="#">Pfam</a> | <a href="#">InterPro</a> |
| Htur_4530       | <a href="#">ADB63335</a> | response regulator receiver protein [Halot... | CDD | <a href="#">UniProt</a> | <a href="#">Pfam</a> | <a href="#">InterPro</a> |
| Htur_4797       | <a href="#">ADB63567</a> | response regulator receiver protein [Halot... | CDD | <a href="#">UniProt</a> | <a href="#">Pfam</a> | <a href="#">InterPro</a> |
| Htur_5237       | <a href="#">ADB63868</a> | response regulator receiver protein [Halot... | CDD | <a href="#">UniProt</a> | <a href="#">Pfam</a> | <a href="#">InterPro</a> |
| *Htur_4286      | <a href="#">ADB63103</a> | response regulator receiver protein [Halot... | CDD | <a href="#">UniProt</a> | <a href="#">Pfam</a> | <a href="#">InterPro</a> |
| <b>REC-HisK</b> |                          |                                               |     |                         |                      |                          |
| Htur_0657       | <a href="#">ADB59554</a> | multi-sensor signal transduction histidine... | CDD | <a href="#">UniProt</a> | <a href="#">Pfam</a> | <a href="#">InterPro</a> |
| Htur_3297       | <a href="#">ADB62161</a> | multi-sensor signal transduction histidine... | CDD | <a href="#">UniProt</a> | <a href="#">Pfam</a> | <a href="#">InterPro</a> |
| Htur_3337       | <a href="#">ADB62201</a> | multi-sensor signal transduction histidine... | CDD | <a href="#">UniProt</a> | <a href="#">Pfam</a> | <a href="#">InterPro</a> |
| <b>REC-CheB</b> |                          |                                               |     |                         |                      |                          |
| Htur_0959       | <a href="#">ADB59853</a> | response regulator receiver modulated CheB... | CDD | <a href="#">UniProt</a> | <a href="#">Pfam</a> | <a href="#">InterPro</a> |
| <b>REC-HalX</b> |                          |                                               |     |                         |                      |                          |
| Htur_0917       | <a href="#">ADB59811</a> | response regulator receiver protein [Halot... | CDD | <a href="#">UniProt</a> | <a href="#">Pfam</a> | <a href="#">InterPro</a> |
| Htur_1264       | <a href="#">ADB60154</a> | response regulator receiver protein [Halot... | CDD | <a href="#">UniProt</a> | <a href="#">Pfam</a> | <a href="#">InterPro</a> |
| Htur_1538       | <a href="#">ADB60424</a> | response regulator receiver protein [Halot... | CDD | <a href="#">UniProt</a> | <a href="#">Pfam</a> | <a href="#">InterPro</a> |
| Htur_2134       | <a href="#">ADB61017</a> | response regulator receiver protein [Halot... | CDD | <a href="#">UniProt</a> | <a href="#">Pfam</a> | <a href="#">InterPro</a> |
| <b>BAT</b>      |                          |                                               |     |                         |                      |                          |
| Htur_0128       | <a href="#">ADB59029</a> | Response regulator receiver modulated GAF ... | CDD | <a href="#">UniProt</a> | <a href="#">Pfam</a> | <a href="#">InterPro</a> |
| Htur_0348       | <a href="#">ADB59249</a> | Response regulator receiver modulated GAF ... | CDD | <a href="#">UniProt</a> | <a href="#">Pfam</a> | <a href="#">InterPro</a> |
| Htur_0709       | <a href="#">ADB59606</a> | Response regulator receiver modulated GAF ... | CDD | <a href="#">UniProt</a> | <a href="#">Pfam</a> | <a href="#">InterPro</a> |
| Htur_2813       | <a href="#">ADB61685</a> | putative PAS/PAC sensor protein [Haloterri... | CDD | <a href="#">UniProt</a> | <a href="#">Pfam</a> | <a href="#">InterPro</a> |

### Halovivax ruber XH-70

#### HisK, no REC

|            |                          |                                               |     |                         |                      |                          |
|------------|--------------------------|-----------------------------------------------|-----|-------------------------|----------------------|--------------------------|
| Halru_0043 | <a href="#">AGB14697</a> | PAS domain S-box [Halovivax ruber XH-70] ...  | CDD | <a href="#">UniProt</a> | <a href="#">Pfam</a> | <a href="#">InterPro</a> |
| Halru_0110 | <a href="#">AGB14762</a> | signal transduction histidine kinase [Halo... | CDD | <a href="#">UniProt</a> | <a href="#">Pfam</a> | <a href="#">InterPro</a> |
| Halru_0140 | <a href="#">AGB14792</a> | PAS domain S-box [Halovivax ruber XH-70] ...  | CDD | <a href="#">UniProt</a> | <a href="#">Pfam</a> | <a href="#">InterPro</a> |
| Halru_0212 | <a href="#">AGB14858</a> | signal transduction histidine kinase [Halo... | CDD | <a href="#">UniProt</a> | <a href="#">Pfam</a> | <a href="#">InterPro</a> |
| Halru_0313 | <a href="#">AGB14957</a> | PAS domain S-box [Halovivax ruber XH-70] ...  | CDD | <a href="#">UniProt</a> | <a href="#">Pfam</a> | <a href="#">InterPro</a> |
| Halru_0412 | <a href="#">AGB15055</a> | PAS domain S-box [Halovivax ruber XH-70] ...  | CDD | <a href="#">UniProt</a> | <a href="#">Pfam</a> | <a href="#">InterPro</a> |
| Halru_0509 | <a href="#">AGB15144</a> | signal transduction histidine kinase [Halo... | CDD | <a href="#">UniProt</a> | <a href="#">Pfam</a> | <a href="#">InterPro</a> |
| Halru_0510 | <a href="#">AGB15145</a> | PAS domain S-box [Halovivax ruber XH-70] ...  | CDD | <a href="#">UniProt</a> | <a href="#">Pfam</a> | <a href="#">InterPro</a> |
| Halru_0750 | <a href="#">AGB15377</a> | bacteriophytochrome (light-regulated signa... | CDD | <a href="#">UniProt</a> | <a href="#">Pfam</a> | <a href="#">InterPro</a> |
| Halru_0813 | <a href="#">AGB15439</a> | PAS domain S-box [Halovivax ruber XH-70] ...  | CDD | <a href="#">UniProt</a> | <a href="#">Pfam</a> | <a href="#">InterPro</a> |
| Halru_1039 | <a href="#">AGB15657</a> | histidine kinase [Halovivax ruber XH-70] ...  | CDD | <a href="#">UniProt</a> | <a href="#">Pfam</a> | <a href="#">InterPro</a> |
| Halru_1142 | <a href="#">AGB15759</a> | PAS domain S-box [Halovivax ruber XH-70] ...  | CDD | <a href="#">UniProt</a> | <a href="#">Pfam</a> | <a href="#">InterPro</a> |
| Halru_1267 | <a href="#">AGB15881</a> | histidine kinase with PAS domain [Haloviva... | CDD | <a href="#">UniProt</a> | <a href="#">Pfam</a> | <a href="#">InterPro</a> |
| Halru_1286 | <a href="#">AGB15900</a> | chemotaxis protein histidine kinase-like p... | CDD | <a href="#">UniProt</a> | <a href="#">Pfam</a> | <a href="#">InterPro</a> |
| Halru_2424 | <a href="#">AGB17006</a> | PAS domain S-box [Halovivax ruber XH-70] ...  | CDD | <a href="#">UniProt</a> | <a href="#">Pfam</a> | <a href="#">InterPro</a> |
| Halru_2446 | <a href="#">AGB17028</a> | PAS domain S-box [Halovivax ruber XH-70] ...  | CDD | <a href="#">UniProt</a> | <a href="#">Pfam</a> | <a href="#">InterPro</a> |
| Halru_2589 | <a href="#">AGB17170</a> | PAS domain S-box [Halovivax ruber XH-70] ...  | CDD | <a href="#">UniProt</a> | <a href="#">Pfam</a> | <a href="#">InterPro</a> |

#### REC only

|            |                          |                                               |     |                         |                      |                          |
|------------|--------------------------|-----------------------------------------------|-----|-------------------------|----------------------|--------------------------|
| Halru_1284 | <a href="#">AGB15898</a> | response regulator containing CheY-like re... | CDD | <a href="#">UniProt</a> | <a href="#">Pfam</a> | <a href="#">InterPro</a> |
| Halru_2111 | <a href="#">AGB16702</a> | response regulator with CheY-like receiver... | CDD | <a href="#">UniProt</a> | <a href="#">Pfam</a> | <a href="#">InterPro</a> |

#### REC-HisK

|            |                          |                                              |     |                         |                      |                          |
|------------|--------------------------|----------------------------------------------|-----|-------------------------|----------------------|--------------------------|
| Halru_0583 | <a href="#">AGB15216</a> | PAS domain S-box [Halovivax ruber XH-70].... | CDD | <a href="#">UniProt</a> | <a href="#">Pfam</a> | <a href="#">InterPro</a> |
| Halru_2261 | <a href="#">AGB16847</a> | PAS domain S-box [Halovivax ruber XH-70].... | CDD | <a href="#">UniProt</a> | <a href="#">Pfam</a> | <a href="#">InterPro</a> |
| Halru_2318 | <a href="#">AGB16903</a> | PAS domain S-box [Halovivax ruber XH-70].... | CDD | <a href="#">UniProt</a> | <a href="#">Pfam</a> | <a href="#">InterPro</a> |

#### REC-CheB

|            |                          |                                               |     |                         |                      |                          |
|------------|--------------------------|-----------------------------------------------|-----|-------------------------|----------------------|--------------------------|
| Halru_1285 | <a href="#">AGB15899</a> | chemotaxis response regulator containing a... | CDD | <a href="#">UniProt</a> | <a href="#">Pfam</a> | <a href="#">InterPro</a> |
|------------|--------------------------|-----------------------------------------------|-----|-------------------------|----------------------|--------------------------|

#### REC-HalX

|            |                          |                                               |     |                         |                      |                          |
|------------|--------------------------|-----------------------------------------------|-----|-------------------------|----------------------|--------------------------|
| Halru_1141 | <a href="#">AGB15758</a> | response regulator with CheY-like receiver... | CDD | <a href="#">UniProt</a> | <a href="#">Pfam</a> | <a href="#">InterPro</a> |
| Halru_1332 | <a href="#">AGB15945</a> | response regulator with CheY-like receiver... | CDD | <a href="#">UniProt</a> | <a href="#">Pfam</a> | <a href="#">InterPro</a> |
| Halru_0139 | <a href="#">AGB14791</a> | response regulator with CheY-like receiver... | CDD | <a href="#">UniProt</a> | <a href="#">Pfam</a> | <a href="#">InterPro</a> |

#### BAT

|            |                          |                                               |     |                         |                      |                          |
|------------|--------------------------|-----------------------------------------------|-----|-------------------------|----------------------|--------------------------|
| Halru_0454 | <a href="#">AGB15092</a> | response regulator with CheY-like receiver... | CDD | <a href="#">UniProt</a> | <a href="#">Pfam</a> | <a href="#">InterPro</a> |
|------------|--------------------------|-----------------------------------------------|-----|-------------------------|----------------------|--------------------------|

### halophilic archaeon DL31

#### HisK, no REC

|            |                          |                                               |     |                         |                      |                          |
|------------|--------------------------|-----------------------------------------------|-----|-------------------------|----------------------|--------------------------|
| Halar_0348 | <a href="#">AENO7604</a> | PAS/PAC sensor signal transduction histidi... | CDD | <a href="#">UniProt</a> | <a href="#">Pfam</a> | <a href="#">InterPro</a> |
| Halar_0535 | <a href="#">AENO7772</a> | PAS/PAC sensor signal transduction histidi... | CDD | <a href="#">UniProt</a> | <a href="#">Pfam</a> | <a href="#">InterPro</a> |
| Halar_1252 | <a href="#">AENO5001</a> | multi-sensor signal transduction histidine... | CDD | <a href="#">UniProt</a> | <a href="#">Pfam</a> | <a href="#">InterPro</a> |
| Halar_1860 | <a href="#">AENO5570</a> | integral membrane sensor signal transducti... | CDD | <a href="#">UniProt</a> | <a href="#">Pfam</a> | <a href="#">InterPro</a> |
| Halar_1910 | <a href="#">AENO5619</a> | PAS/PAC sensor signal transduction histidi... | CDD | <a href="#">UniProt</a> | <a href="#">Pfam</a> | <a href="#">InterPro</a> |
| Halar_2090 | <a href="#">AENO5774</a> | integral membrane sensor signal transducti... | CDD | <a href="#">UniProt</a> | <a href="#">Pfam</a> | <a href="#">InterPro</a> |
| Halar_2135 | <a href="#">AENO5817</a> | histidine kinase [halophilic archaeon DL31... | CDD | <a href="#">UniProt</a> | <a href="#">Pfam</a> | <a href="#">InterPro</a> |
| Halar_2293 | <a href="#">AENO5965</a> | histidine kinase [halophilic archaeon DL31... | CDD | <a href="#">UniProt</a> | <a href="#">Pfam</a> | <a href="#">InterPro</a> |
| Halar_2384 | <a href="#">AENO6047</a> | PAS/PAC sensor signal transduction histidi... | CDD | <a href="#">UniProt</a> | <a href="#">Pfam</a> | <a href="#">InterPro</a> |
| Halar_2680 | <a href="#">AENO6325</a> | multi-sensor signal transduction histidine... | CDD | <a href="#">UniProt</a> | <a href="#">Pfam</a> | <a href="#">InterPro</a> |
| Halar_2797 | <a href="#">AENO6432</a> | multi-sensor signal transduction histidine... | CDD | <a href="#">UniProt</a> | <a href="#">Pfam</a> | <a href="#">InterPro</a> |
| Halar_3242 | <a href="#">AENO6855</a> | multi-sensor signal transduction histidine... | CDD | <a href="#">UniProt</a> | <a href="#">Pfam</a> | <a href="#">InterPro</a> |
| Halar_3393 | <a href="#">AENO6996</a> | multi-sensor signal transduction histidine... | CDD | <a href="#">UniProt</a> | <a href="#">Pfam</a> | <a href="#">InterPro</a> |

#### REC only

|            |                          |                                               |     |                         |                      |                          |
|------------|--------------------------|-----------------------------------------------|-----|-------------------------|----------------------|--------------------------|
| Halar_0350 | <a href="#">AENO7606</a> | response regulator receiver protein (plasm... | CDD | <a href="#">UniProt</a> | <a href="#">Pfam</a> | <a href="#">InterPro</a> |
|------------|--------------------------|-----------------------------------------------|-----|-------------------------|----------------------|--------------------------|

#### REC-HisK

|                 |                          |                                               |                     |                         |                      |                          |
|-----------------|--------------------------|-----------------------------------------------|---------------------|-------------------------|----------------------|--------------------------|
| Halar_0299      | <a href="#">AENO7558</a> | multi-sensor signal transduction histidine... | <a href="#">CDD</a> | <a href="#">UniProt</a> | <a href="#">Pfam</a> | <a href="#">InterPro</a> |
| Halar_1537      | <a href="#">AENO5269</a> | multi-sensor signal transduction histidine... | <a href="#">CDD</a> | <a href="#">UniProt</a> | <a href="#">Pfam</a> | <a href="#">InterPro</a> |
| Halar_3160      | <a href="#">AENO6776</a> | multi-sensor signal transduction histidine... | <a href="#">CDD</a> | <a href="#">UniProt</a> | <a href="#">Pfam</a> | <a href="#">InterPro</a> |
| <b>REC-HalX</b> |                          |                                               |                     |                         |                      |                          |
| Halar_1479      | <a href="#">AENO5212</a> | response regulator receiver protein [halop... | <a href="#">CDD</a> | <a href="#">UniProt</a> | <a href="#">Pfam</a> | <a href="#">InterPro</a> |
| <b>BAT</b>      |                          |                                               |                     |                         |                      |                          |
| Halar_2454      | <a href="#">AENO6108</a> | putative PAS/PAC sensor protein [halophili... | <a href="#">CDD</a> | <a href="#">UniProt</a> | <a href="#">Pfam</a> | <a href="#">InterPro</a> |

### [Methanobacterium congolense isolate Buetzberg](#)

#### **HisK, no REC**

|           |                          |                                               |                     |                         |                      |                          |
|-----------|--------------------------|-----------------------------------------------|---------------------|-------------------------|----------------------|--------------------------|
| MCBB_0068 | <a href="#">SCG84656</a> | putative sensor histidine kinase pdtaS [Me... | <a href="#">CDD</a> | <a href="#">UniProt</a> | <a href="#">Pfam</a> | <a href="#">InterPro</a> |
| MCBB_0614 | <a href="#">SCG85187</a> | putative sensor histidine kinase pdtaS [Me... | <a href="#">CDD</a> | <a href="#">UniProt</a> | <a href="#">Pfam</a> | <a href="#">InterPro</a> |
| MCBB_0628 | <a href="#">SCG85201</a> | Signal transduction histidine kinase [Meth... | <a href="#">CDD</a> | <a href="#">UniProt</a> | <a href="#">Pfam</a> | <a href="#">InterPro</a> |
| MCBB_0815 | <a href="#">SCG85380</a> | putative sensor histidine kinase pdtaS [Me... | <a href="#">CDD</a> | <a href="#">UniProt</a> | <a href="#">Pfam</a> | <a href="#">InterPro</a> |
| MCBB_1261 | <a href="#">SCG85819</a> | putative sensor histidine kinase pdtaS [Me... | <a href="#">CDD</a> | <a href="#">UniProt</a> | <a href="#">Pfam</a> | <a href="#">InterPro</a> |
| MCBB_1296 | <a href="#">SCG85854</a> | Methyl sulfide methyltransferase-associate... | <a href="#">CDD</a> | <a href="#">UniProt</a> | <a href="#">Pfam</a> | <a href="#">InterPro</a> |
| MCBB_1518 | <a href="#">SCG86073</a> | putative sensor histidine kinase pdtaS [Me... | <a href="#">CDD</a> | <a href="#">UniProt</a> | <a href="#">Pfam</a> | <a href="#">InterPro</a> |
| MCBB_1772 | <a href="#">SCG86323</a> | putative sensor histidine kinase pdtaS [Me... | <a href="#">CDD</a> | <a href="#">UniProt</a> | <a href="#">Pfam</a> | <a href="#">InterPro</a> |
| MCBB_1872 | <a href="#">SCG86421</a> | putative sensor histidine kinase pdtaS [Me... | <a href="#">CDD</a> | <a href="#">UniProt</a> | <a href="#">Pfam</a> | <a href="#">InterPro</a> |
| MCBB_2314 | <a href="#">SCG86852</a> | putative sensor histidine kinase pdtaS [Me... | <a href="#">CDD</a> | <a href="#">UniProt</a> | <a href="#">Pfam</a> | <a href="#">InterPro</a> |

#### **REC only**

|           |                          |                                               |                     |                         |                      |                          |
|-----------|--------------------------|-----------------------------------------------|---------------------|-------------------------|----------------------|--------------------------|
| MCBB_1548 | <a href="#">SCG86103</a> | putative histidine kinase 1 [Methanobacter... | <a href="#">CDD</a> | <a href="#">UniProt</a> | <a href="#">Pfam</a> | <a href="#">InterPro</a> |
| MCBB_1688 | <a href="#">SCG86243</a> | Phyllosphere-induced regulator PhyR [Metha... | <a href="#">CDD</a> | <a href="#">UniProt</a> | <a href="#">Pfam</a> | <a href="#">InterPro</a> |

#### **REC-HisK**

|           |                          |                                               |                     |                         |                      |                          |
|-----------|--------------------------|-----------------------------------------------|---------------------|-------------------------|----------------------|--------------------------|
| MCBB_0649 | <a href="#">SCG85222</a> | putative sensor histidine kinase pdtaS [Me... | <a href="#">CDD</a> | <a href="#">UniProt</a> | <a href="#">Pfam</a> | <a href="#">InterPro</a> |
| MCBB_0916 | <a href="#">SCG85476</a> | Signal transduction histidine kinase [Meth... | <a href="#">CDD</a> | <a href="#">UniProt</a> | <a href="#">Pfam</a> | <a href="#">InterPro</a> |
| MCBB_2021 | <a href="#">SCG86569</a> | putative transcriptional regulatory protei... | <a href="#">CDD</a> | <a href="#">UniProt</a> | <a href="#">Pfam</a> | <a href="#">InterPro</a> |
| MCBB_2060 | <a href="#">SCG86603</a> | putative sensor histidine kinase pdtaS [Me... | <a href="#">CDD</a> | <a href="#">UniProt</a> | <a href="#">Pfam</a> | <a href="#">InterPro</a> |

#### **REC-PAS**

|           |                          |                                               |                     |                         |                      |                          |
|-----------|--------------------------|-----------------------------------------------|---------------------|-------------------------|----------------------|--------------------------|
| MCBB_0027 | <a href="#">SCG84616</a> | putative transcriptional regulatory protei... | <a href="#">CDD</a> | <a href="#">UniProt</a> | <a href="#">Pfam</a> | <a href="#">InterPro</a> |
|-----------|--------------------------|-----------------------------------------------|---------------------|-------------------------|----------------------|--------------------------|

#### **REC-MetOD1**

|           |                          |                                               |                     |                         |                      |                          |                  |
|-----------|--------------------------|-----------------------------------------------|---------------------|-------------------------|----------------------|--------------------------|------------------|
| MCBB_1096 | <a href="#">SCG85655</a> | putative transcriptional regulatory protei... | <a href="#">CDD</a> | <a href="#">UniProt</a> | <a href="#">Pfam</a> | <a href="#">InterPro</a> | (REC-PAS-MetOD1) |
| MCBB_1432 | <a href="#">SCG85988</a> | putative transcriptional regulatory protei... | <a href="#">CDD</a> | <a href="#">UniProt</a> | <a href="#">Pfam</a> | <a href="#">InterPro</a> | (REC-MetOD1)     |

### [Methanobacterium formicicum BRM9](#)

#### **HisK, no REC**

|           |                          |                                                |                     |                         |                      |                          |
|-----------|--------------------------|------------------------------------------------|---------------------|-------------------------|----------------------|--------------------------|
| BRM9_0417 | <a href="#">AIS31244</a> | signal transduction histidine kinase [Meth...  | <a href="#">CDD</a> | <a href="#">UniProt</a> | <a href="#">Pfam</a> | <a href="#">InterPro</a> |
| BRM9_0432 | <a href="#">AIS31257</a> | histidine kinase/PAS domain-containing pro...  | <a href="#">CDD</a> | <a href="#">UniProt</a> | <a href="#">Pfam</a> | <a href="#">InterPro</a> |
| BRM9_0435 | <a href="#">AIS31260</a> | histidine kinase/PAS domain-containing pro...  | <a href="#">CDD</a> | <a href="#">UniProt</a> | <a href="#">Pfam</a> | <a href="#">InterPro</a> |
| BRM9_0748 | <a href="#">AIS31568</a> | signal transduction histidine kinase [Meth...  | <a href="#">CDD</a> | <a href="#">UniProt</a> | <a href="#">Pfam</a> | <a href="#">InterPro</a> |
| BRM9_0978 | <a href="#">AIS31795</a> | two component system histidine kinase [Met...  | <a href="#">CDD</a> | <a href="#">UniProt</a> | <a href="#">Pfam</a> | <a href="#">InterPro</a> |
| BRM9_1002 | <a href="#">AIS31818</a> | histidine kinase/PAS domain-containing pro...  | <a href="#">CDD</a> | <a href="#">UniProt</a> | <a href="#">Pfam</a> | <a href="#">InterPro</a> |
| BRM9_1005 | <a href="#">AIS31821</a> | histidine kinase/PAS domain-containing pro...  | <a href="#">CDD</a> | <a href="#">UniProt</a> | <a href="#">Pfam</a> | <a href="#">InterPro</a> |
| BRM9_1036 | <a href="#">AIS31852</a> | histidine kinase/PAS domain-containing pro...  | <a href="#">CDD</a> | <a href="#">UniProt</a> | <a href="#">Pfam</a> | <a href="#">InterPro</a> |
| BRM9_1139 | <a href="#">AIS31955</a> | histidine kinase/PAS domain-containing pro...  | <a href="#">CDD</a> | <a href="#">UniProt</a> | <a href="#">Pfam</a> | <a href="#">InterPro</a> |
| BRM9_1209 | <a href="#">AIS32024</a> | histidine kinase/PAS domain-containing pro...  | <a href="#">CDD</a> | <a href="#">UniProt</a> | <a href="#">Pfam</a> | <a href="#">InterPro</a> |
| BRM9_1224 | <a href="#">AIS32039</a> | histidine kinase/PAS domain-containing pro...  | <a href="#">CDD</a> | <a href="#">UniProt</a> | <a href="#">Pfam</a> | <a href="#">InterPro</a> |
| BRM9_1237 | <a href="#">AIS32052</a> | histidine kinase/PAS domain-containing pro...  | <a href="#">CDD</a> | <a href="#">UniProt</a> | <a href="#">Pfam</a> | <a href="#">InterPro</a> |
| BRM9_1350 | <a href="#">AIS32165</a> | signal transduction histidine kinase [Meth...  | <a href="#">CDD</a> | <a href="#">UniProt</a> | <a href="#">Pfam</a> | <a href="#">InterPro</a> |
| BRM9_1404 | <a href="#">AIS32218</a> | two component system histidine kinase [Meth... | <a href="#">CDD</a> | <a href="#">UniProt</a> | <a href="#">Pfam</a> | <a href="#">InterPro</a> |
| BRM9_1491 | <a href="#">AIS32305</a> | histidine kinase/PAS domain-containing pro...  | <a href="#">CDD</a> | <a href="#">UniProt</a> | <a href="#">Pfam</a> | <a href="#">InterPro</a> |
| BRM9_1636 | <a href="#">AIS32448</a> | signal transduction histidine kinase [Meth...  | <a href="#">CDD</a> | <a href="#">UniProt</a> | <a href="#">Pfam</a> | <a href="#">InterPro</a> |
| BRM9_1659 | <a href="#">AIS32471</a> | histidine kinase/PAS domain-containing pro...  | <a href="#">CDD</a> | <a href="#">UniProt</a> | <a href="#">Pfam</a> | <a href="#">InterPro</a> |
| BRM9_1746 | <a href="#">AIS32556</a> | histidine kinase/PAS domain-containing pro...  | <a href="#">CDD</a> | <a href="#">UniProt</a> | <a href="#">Pfam</a> | <a href="#">InterPro</a> |
| BRM9_1755 | <a href="#">AIS32565</a> | histidine kinase/PAS domain-containing pro...  | <a href="#">CDD</a> | <a href="#">UniProt</a> | <a href="#">Pfam</a> | <a href="#">InterPro</a> |
| BRM9_1925 | <a href="#">AIS32729</a> | histidine kinase/PAS domain-containing pro...  | <a href="#">CDD</a> | <a href="#">UniProt</a> | <a href="#">Pfam</a> | <a href="#">InterPro</a> |
| BRM9_1948 | <a href="#">AIS32752</a> | signal transduction histidine kinase [Meth...  | <a href="#">CDD</a> | <a href="#">UniProt</a> | <a href="#">Pfam</a> | <a href="#">InterPro</a> |
| BRM9_2038 | <a href="#">AIS32840</a> | signal transduction histidine kinase [Meth...  | <a href="#">CDD</a> | <a href="#">UniProt</a> | <a href="#">Pfam</a> | <a href="#">InterPro</a> |
| BRM9_2109 | <a href="#">AIS32911</a> | histidine kinase/PAS domain-containing pro...  | <a href="#">CDD</a> | <a href="#">UniProt</a> | <a href="#">Pfam</a> | <a href="#">InterPro</a> |

#### **REC only**

|           |                          |                                               |                     |                         |                      |                          |
|-----------|--------------------------|-----------------------------------------------|---------------------|-------------------------|----------------------|--------------------------|
| BRM9_0637 | <a href="#">AIS31460</a> | response regulator domain containing prote... | <a href="#">CDD</a> | <a href="#">UniProt</a> | <a href="#">Pfam</a> | <a href="#">InterPro</a> |
| BRM9_0976 | <a href="#">AIS31793</a> | response regulator domain-containing prote... | <a href="#">CDD</a> | <a href="#">UniProt</a> | <a href="#">Pfam</a> | <a href="#">InterPro</a> |
| BRM9_1035 | <a href="#">AIS31851</a> | response regulator domain-containing prote... | <a href="#">CDD</a> | <a href="#">UniProt</a> | <a href="#">Pfam</a> | <a href="#">InterPro</a> |
| BRM9_1148 | <a href="#">AIS31964</a> | response regulator domain-containing prote... | <a href="#">CDD</a> | <a href="#">UniProt</a> | <a href="#">Pfam</a> | <a href="#">InterPro</a> |
| BRM9_1234 | <a href="#">AIS32049</a> | response regulator domain-containing prote... | <a href="#">CDD</a> | <a href="#">UniProt</a> | <a href="#">Pfam</a> | <a href="#">InterPro</a> |
| BRM9_1405 | <a href="#">AIS32219</a> | two component system response regulator [M... | <a href="#">CDD</a> | <a href="#">UniProt</a> | <a href="#">Pfam</a> | <a href="#">InterPro</a> |
| BRM9_1846 | <a href="#">AIS32654</a> | response regulator domain-containing prote... | <a href="#">CDD</a> | <a href="#">UniProt</a> | <a href="#">Pfam</a> | <a href="#">InterPro</a> |

#### **REC-HisK**

|            |                          |                                               |                     |                         |                      |                          |
|------------|--------------------------|-----------------------------------------------|---------------------|-------------------------|----------------------|--------------------------|
| BRM9_0252  | <a href="#">AIS31081</a> | histidine kinase/PAS domain-containing pro... | <a href="#">CDD</a> | <a href="#">UniProt</a> | <a href="#">Pfam</a> | <a href="#">InterPro</a> |
| BRM9_0860  | <a href="#">AIS31677</a> | histidine kinase/PAS domain-containing pro... | <a href="#">CDD</a> | <a href="#">UniProt</a> | <a href="#">Pfam</a> | <a href="#">InterPro</a> |
| BRM9_0975  | <a href="#">AIS31792</a> | two component system histidine kinase/resp... | <a href="#">CDD</a> | <a href="#">UniProt</a> | <a href="#">Pfam</a> | <a href="#">InterPro</a> |
| BRM9_1144  | <a href="#">AIS31960</a> | histidine kinase/GAF/PAS domain-containin ... | <a href="#">CDD</a> | <a href="#">UniProt</a> | <a href="#">Pfam</a> | <a href="#">InterPro</a> |
| BRM9_1406  | <a href="#">AIS32220</a> | histidine kinase/PAS domain-containing pro... | <a href="#">CDD</a> | <a href="#">UniProt</a> | <a href="#">Pfam</a> | <a href="#">InterPro</a> |
| BRM9_2138  | <a href="#">AIS32940</a> | histidine kinase/response regulator hybrid... | <a href="#">CDD</a> | <a href="#">UniProt</a> | <a href="#">Pfam</a> | <a href="#">InterPro</a> |
| *BRM9_0748 | <a href="#">AIS31568</a> | signal transduction histidine kinase [Meth... | <a href="#">CDD</a> | <a href="#">UniProt</a> | <a href="#">Pfam</a> | <a href="#">InterPro</a> |

#### **REC-PAS**

|           |                          |                                               |                     |                         |                      |                          |
|-----------|--------------------------|-----------------------------------------------|---------------------|-------------------------|----------------------|--------------------------|
| BRM9_0068 | <a href="#">AIS30901</a> | response regulator/PAS domain-containing p... | <a href="#">CDD</a> | <a href="#">UniProt</a> | <a href="#">Pfam</a> | <a href="#">InterPro</a> |
|-----------|--------------------------|-----------------------------------------------|---------------------|-------------------------|----------------------|--------------------------|

|                    |                          |                                               |                     |                         |                      |                          |                  |
|--------------------|--------------------------|-----------------------------------------------|---------------------|-------------------------|----------------------|--------------------------|------------------|
| BRM9_0069          | <a href="#">AIS30902</a> | response regulator/PAS domain-containing p... | <a href="#">CDD</a> | <a href="#">UniProt</a> | <a href="#">Pfam</a> | <a href="#">InterPro</a> |                  |
| BRM9_0349          | <a href="#">AIS31176</a> | response regulator/PAS domain-containing p... | <a href="#">CDD</a> | <a href="#">UniProt</a> | <a href="#">Pfam</a> | <a href="#">InterPro</a> |                  |
| BRM9_0433          | <a href="#">AIS31258</a> | PAS domain-containing protein [Methanobact... | <a href="#">CDD</a> | <a href="#">UniProt</a> | <a href="#">Pfam</a> | <a href="#">InterPro</a> |                  |
| BRM9_0977          | <a href="#">AIS31794</a> | two component system response regulator [M... | <a href="#">CDD</a> | <a href="#">UniProt</a> | <a href="#">Pfam</a> | <a href="#">InterPro</a> |                  |
| BRM9_1034          | <a href="#">AIS31850</a> | response regulator/PAS domain-containing p... | <a href="#">CDD</a> | <a href="#">UniProt</a> | <a href="#">Pfam</a> | <a href="#">InterPro</a> |                  |
| BRM9_1049          | <a href="#">AIS31865</a> | PAS domain-containing protein [Methanobact... | <a href="#">CDD</a> | <a href="#">UniProt</a> | <a href="#">Pfam</a> | <a href="#">InterPro</a> |                  |
| BRM9_1233          | <a href="#">AIS32048</a> | response regulator/PAS domain-containing p... | <a href="#">CDD</a> | <a href="#">UniProt</a> | <a href="#">Pfam</a> | <a href="#">InterPro</a> |                  |
| BRM9_1414          | <a href="#">AIS32228</a> | PAS domain-containing protein [Methanobact... | <a href="#">CDD</a> | <a href="#">UniProt</a> | <a href="#">Pfam</a> | <a href="#">InterPro</a> |                  |
| <b>REC-GAF-PAS</b> |                          |                                               |                     |                         |                      |                          |                  |
| BRM9_1144          | <a href="#">AIS31960</a> | histidine kinase/GAF/PAS domain-containing... | <a href="#">CDD</a> | <a href="#">UniProt</a> | <a href="#">Pfam</a> | <a href="#">InterPro</a> |                  |
| <b>REC-BcsA</b>    |                          |                                               |                     |                         |                      |                          |                  |
| BRM9_1475          | <a href="#">AIS32289</a> | glycosyl transferase GT2 family with respo... | <a href="#">CDD</a> | <a href="#">UniProt</a> | <a href="#">Pfam</a> | <a href="#">InterPro</a> | (REC-BcsA)       |
| <b>REC-MetOD1</b>  |                          |                                               |                     |                         |                      |                          |                  |
| BRM9_1223          | <a href="#">AIS32038</a> | response regulator domain-containing prote... | <a href="#">CDD</a> | <a href="#">UniProt</a> | <a href="#">Pfam</a> | <a href="#">InterPro</a> | (REC-MetOD1)     |
| BRM9_1398          | <a href="#">AIS32213</a> | response regulator/PAS domain-containing p... | <a href="#">CDD</a> | <a href="#">UniProt</a> | <a href="#">Pfam</a> | <a href="#">InterPro</a> | (REC-PAS-MetOD1) |
| BRM9_1407          | <a href="#">AIS32221</a> | response regulator domain-containing prote... | <a href="#">CDD</a> | <a href="#">UniProt</a> | <a href="#">Pfam</a> | <a href="#">InterPro</a> | (REC-MetOD1)     |

### Methanobacterium lacus AL-21

#### **HisK, no REC**

|            |                          |                                               |                     |                         |                      |                          |  |
|------------|--------------------------|-----------------------------------------------|---------------------|-------------------------|----------------------|--------------------------|--|
| Metbo_0409 | <a href="#">ADZ08661</a> | signal transduction histidine kinase [Meth... | <a href="#">CDD</a> | <a href="#">UniProt</a> | <a href="#">Pfam</a> | <a href="#">InterPro</a> |  |
| Metbo_0448 | <a href="#">ADZ08700</a> | signal transduction histidine kinase [Meth... | <a href="#">CDD</a> | <a href="#">UniProt</a> | <a href="#">Pfam</a> | <a href="#">InterPro</a> |  |
| Metbo_0507 | <a href="#">ADZ08759</a> | signal transduction histidine kinase [Meth... | <a href="#">CDD</a> | <a href="#">UniProt</a> | <a href="#">Pfam</a> | <a href="#">InterPro</a> |  |
| Metbo_0937 | <a href="#">ADZ09184</a> | PAS/PAC sensor signal transduction histidi... | <a href="#">CDD</a> | <a href="#">UniProt</a> | <a href="#">Pfam</a> | <a href="#">InterPro</a> |  |
| Metbo_1039 | <a href="#">ADZ09286</a> | signal transduction histidine kinase [Meth... | <a href="#">CDD</a> | <a href="#">UniProt</a> | <a href="#">Pfam</a> | <a href="#">InterPro</a> |  |
| Metbo_1049 | <a href="#">ADZ09296</a> | PAS/PAC sensor signal transduction histidi... | <a href="#">CDD</a> | <a href="#">UniProt</a> | <a href="#">Pfam</a> | <a href="#">InterPro</a> |  |
| Metbo_1102 | <a href="#">ADZ09347</a> | histidine kinase [Methanobacterium lacus] ... | <a href="#">CDD</a> | <a href="#">UniProt</a> | <a href="#">Pfam</a> | <a href="#">InterPro</a> |  |
| Metbo_1235 | <a href="#">ADZ09477</a> | PAS/PAC sensor signal transduction histidi... | <a href="#">CDD</a> | <a href="#">UniProt</a> | <a href="#">Pfam</a> | <a href="#">InterPro</a> |  |
| Metbo_1328 | <a href="#">ADZ09569</a> | PAS/PAC sensor signal transduction histidi... | <a href="#">CDD</a> | <a href="#">UniProt</a> | <a href="#">Pfam</a> | <a href="#">InterPro</a> |  |
| Metbo_1329 | <a href="#">ADZ09570</a> | signal transduction histidine kinase [Meth... | <a href="#">CDD</a> | <a href="#">UniProt</a> | <a href="#">Pfam</a> | <a href="#">InterPro</a> |  |
| Metbo_1353 | <a href="#">ADZ09593</a> | signal transduction histidine kinase [Meth... | <a href="#">CDD</a> | <a href="#">UniProt</a> | <a href="#">Pfam</a> | <a href="#">InterPro</a> |  |
| Metbo_1417 | <a href="#">ADZ09656</a> | signal transduction histidine kinase [Meth... | <a href="#">CDD</a> | <a href="#">UniProt</a> | <a href="#">Pfam</a> | <a href="#">InterPro</a> |  |
| Metbo_1430 | <a href="#">ADZ09668</a> | signal transduction histidine kinase [Meth... | <a href="#">CDD</a> | <a href="#">UniProt</a> | <a href="#">Pfam</a> | <a href="#">InterPro</a> |  |
| Metbo_1445 | <a href="#">ADZ09683</a> | PAS/PAC sensor signal transduction histidi... | <a href="#">CDD</a> | <a href="#">UniProt</a> | <a href="#">Pfam</a> | <a href="#">InterPro</a> |  |
| Metbo_1514 | <a href="#">ADZ09745</a> | PAS/PAC sensor signal transduction histidi... | <a href="#">CDD</a> | <a href="#">UniProt</a> | <a href="#">Pfam</a> | <a href="#">InterPro</a> |  |
| Metbo_1550 | <a href="#">ADZ09778</a> | signal transduction histidine kinase [Meth... | <a href="#">CDD</a> | <a href="#">UniProt</a> | <a href="#">Pfam</a> | <a href="#">InterPro</a> |  |
| Metbo_1593 | <a href="#">ADZ09820</a> | signal transduction histidine kinase [Meth... | <a href="#">CDD</a> | <a href="#">UniProt</a> | <a href="#">Pfam</a> | <a href="#">InterPro</a> |  |
| Metbo_1622 | <a href="#">ADZ09849</a> | multi-sensor signal transduction histidine... | <a href="#">CDD</a> | <a href="#">UniProt</a> | <a href="#">Pfam</a> | <a href="#">InterPro</a> |  |
| Metbo_1624 | <a href="#">ADZ09851</a> | multi-sensor signal transduction histidine... | <a href="#">CDD</a> | <a href="#">UniProt</a> | <a href="#">Pfam</a> | <a href="#">InterPro</a> |  |
| Metbo_1625 | <a href="#">ADZ09852</a> | PAS/PAC sensor signal transduction histidi... | <a href="#">CDD</a> | <a href="#">UniProt</a> | <a href="#">Pfam</a> | <a href="#">InterPro</a> |  |
| Metbo_1666 | <a href="#">ADZ09892</a> | integral membrane sensor signal transducti... | <a href="#">CDD</a> | <a href="#">UniProt</a> | <a href="#">Pfam</a> | <a href="#">InterPro</a> |  |
| Metbo_1676 | <a href="#">ADZ09902</a> | signal transduction histidine kinase [Meth... | <a href="#">CDD</a> | <a href="#">UniProt</a> | <a href="#">Pfam</a> | <a href="#">InterPro</a> |  |
| Metbo_1775 | <a href="#">ADZ09998</a> | PAS/PAC sensor signal transduction histidi... | <a href="#">CDD</a> | <a href="#">UniProt</a> | <a href="#">Pfam</a> | <a href="#">InterPro</a> |  |
| Metbo_1783 | <a href="#">ADZ10005</a> | PAS/PAC sensor signal transduction histidi... | <a href="#">CDD</a> | <a href="#">UniProt</a> | <a href="#">Pfam</a> | <a href="#">InterPro</a> |  |
| Metbo_1823 | <a href="#">ADZ10045</a> | signal transduction histidine kinase [Meth... | <a href="#">CDD</a> | <a href="#">UniProt</a> | <a href="#">Pfam</a> | <a href="#">InterPro</a> |  |
| Metbo_1846 | <a href="#">ADZ10068</a> | signal transduction histidine kinase [Meth... | <a href="#">CDD</a> | <a href="#">UniProt</a> | <a href="#">Pfam</a> | <a href="#">InterPro</a> |  |
| Metbo_1865 | <a href="#">ADZ10086</a> | signal transduction histidine kinase [Meth... | <a href="#">CDD</a> | <a href="#">UniProt</a> | <a href="#">Pfam</a> | <a href="#">InterPro</a> |  |
| Metbo_2284 | <a href="#">ADZ10498</a> | multi-sensor signal transduction histidine... | <a href="#">CDD</a> | <a href="#">UniProt</a> | <a href="#">Pfam</a> | <a href="#">InterPro</a> |  |
| Metbo_2320 | <a href="#">ADZ10534</a> | signal transduction histidine kinase [Meth... | <a href="#">CDD</a> | <a href="#">UniProt</a> | <a href="#">Pfam</a> | <a href="#">InterPro</a> |  |

#### **REC only**

|            |                          |                                               |                     |                         |                      |                          |  |
|------------|--------------------------|-----------------------------------------------|---------------------|-------------------------|----------------------|--------------------------|--|
| Metbo_1044 | <a href="#">ADZ09291</a> | response regulator receiver protein [Metha... | <a href="#">CDD</a> | <a href="#">UniProt</a> | <a href="#">Pfam</a> | <a href="#">InterPro</a> |  |
| Metbo_1079 | <a href="#">ADZ09324</a> | response regulator receiver [Methanobacter... | <a href="#">CDD</a> | <a href="#">UniProt</a> | <a href="#">Pfam</a> | <a href="#">InterPro</a> |  |
| Metbo_1223 | <a href="#">ADZ09465</a> | response regulator receiver protein [Metha... | <a href="#">CDD</a> | <a href="#">UniProt</a> | <a href="#">Pfam</a> | <a href="#">InterPro</a> |  |
| Metbo_1236 | <a href="#">ADZ09478</a> | response regulator receiver protein [Metha... | <a href="#">CDD</a> | <a href="#">UniProt</a> | <a href="#">Pfam</a> | <a href="#">InterPro</a> |  |
| Metbo_1101 | <a href="#">ADZ09346</a> | response regulator receiver protein [Metha... | <a href="#">CDD</a> | <a href="#">UniProt</a> | <a href="#">Pfam</a> | <a href="#">InterPro</a> |  |
| Metbo_1592 | <a href="#">ADZ09819</a> | response regulator receiver [Methanobacter... | <a href="#">CDD</a> | <a href="#">UniProt</a> | <a href="#">Pfam</a> | <a href="#">InterPro</a> |  |
| Metbo_1635 | <a href="#">ADZ09861</a> | hypothetical protein Metbo_1635 [Methanoba... | <a href="#">CDD</a> | <a href="#">UniProt</a> | <a href="#">Pfam</a> | <a href="#">InterPro</a> |  |
| Metbo_1742 | <a href="#">ADZ09965</a> | response regulator receiver protein [Metha... | <a href="#">CDD</a> | <a href="#">UniProt</a> | <a href="#">Pfam</a> | <a href="#">InterPro</a> |  |

#### **REC-HisK**

|            |                          |                                               |                     |                         |                      |                          |  |
|------------|--------------------------|-----------------------------------------------|---------------------|-------------------------|----------------------|--------------------------|--|
| Metbo_0326 | <a href="#">ADZ08578</a> | signal transduction histidine kinase [Meth... | <a href="#">CDD</a> | <a href="#">UniProt</a> | <a href="#">Pfam</a> | <a href="#">InterPro</a> |  |
| Metbo_0757 | <a href="#">ADZ09008</a> | signal transduction histidine kinase [Meth... | <a href="#">CDD</a> | <a href="#">UniProt</a> | <a href="#">Pfam</a> | <a href="#">InterPro</a> |  |
| Metbo_1100 | <a href="#">ADZ09345</a> | signal transduction histidine kinase [Meth... | <a href="#">CDD</a> | <a href="#">UniProt</a> | <a href="#">Pfam</a> | <a href="#">InterPro</a> |  |
| Metbo_1412 | <a href="#">ADZ09651</a> | signal transduction histidine kinase [Meth... | <a href="#">CDD</a> | <a href="#">UniProt</a> | <a href="#">Pfam</a> | <a href="#">InterPro</a> |  |
| Metbo_1429 | <a href="#">ADZ09667</a> | signal transduction histidine kinase [Meth... | <a href="#">CDD</a> | <a href="#">UniProt</a> | <a href="#">Pfam</a> | <a href="#">InterPro</a> |  |
| Metbo_1591 | <a href="#">ADZ09818</a> | signal transduction histidine kinase [Meth... | <a href="#">CDD</a> | <a href="#">UniProt</a> | <a href="#">Pfam</a> | <a href="#">InterPro</a> |  |
| Metbo_1755 | <a href="#">ADZ09978</a> | signal transduction histidine kinase [Meth... | <a href="#">CDD</a> | <a href="#">UniProt</a> | <a href="#">Pfam</a> | <a href="#">InterPro</a> |  |
| Metbo_1895 | <a href="#">ADZ10115</a> | signal transduction histidine kinase [Meth... | <a href="#">CDD</a> | <a href="#">UniProt</a> | <a href="#">Pfam</a> | <a href="#">InterPro</a> |  |
| Metbo_1896 | <a href="#">ADZ10116</a> | signal transduction histidine kinase [Meth... | <a href="#">CDD</a> | <a href="#">UniProt</a> | <a href="#">Pfam</a> | <a href="#">InterPro</a> |  |

#### **REC-PAS**

|            |                          |                                               |                     |                         |                      |                          |  |
|------------|--------------------------|-----------------------------------------------|---------------------|-------------------------|----------------------|--------------------------|--|
| Metbo_0064 | <a href="#">ADZ08317</a> | putative PAS/PAC sensor protein [Methanoba... | <a href="#">CDD</a> | <a href="#">UniProt</a> | <a href="#">Pfam</a> | <a href="#">InterPro</a> |  |
| Metbo_0065 | <a href="#">ADZ08318</a> | putative PAS/PAC sensor protein [Methanoba... | <a href="#">CDD</a> | <a href="#">UniProt</a> | <a href="#">Pfam</a> | <a href="#">InterPro</a> |  |
| Metbo_1237 | <a href="#">ADZ09479</a> | putative PAS/PAC sensor protein [Methanoba... | <a href="#">CDD</a> | <a href="#">UniProt</a> | <a href="#">Pfam</a> | <a href="#">InterPro</a> |  |
| Metbo_1351 | <a href="#">ADZ09591</a> | putative PAS/PAC sensor protein [Methanoba... | <a href="#">CDD</a> | <a href="#">UniProt</a> | <a href="#">Pfam</a> | <a href="#">InterPro</a> |  |
| Metbo_1352 | <a href="#">ADZ09592</a> | putative PAS/PAC sensor protein [Methanoba... | <a href="#">CDD</a> | <a href="#">UniProt</a> | <a href="#">Pfam</a> | <a href="#">InterPro</a> |  |
| Metbo_1828 | <a href="#">ADZ10050</a> | putative PAS/PAC sensor protein [Methanoba... | <a href="#">CDD</a> | <a href="#">UniProt</a> | <a href="#">Pfam</a> | <a href="#">InterPro</a> |  |
| Metbo_1872 | <a href="#">ADZ10093</a> | putative PAS/PAC sensor protein [Methanoba... | <a href="#">CDD</a> | <a href="#">UniProt</a> | <a href="#">Pfam</a> | <a href="#">InterPro</a> |  |
| Metbo_2061 | <a href="#">ADZ10280</a> | putative PAS/PAC sensor protein [Methanoba... | <a href="#">CDD</a> | <a href="#">UniProt</a> | <a href="#">Pfam</a> | <a href="#">InterPro</a> |  |
| Metbo_2319 | <a href="#">ADZ10533</a> | PAS sensor protein [Methanobacterium lacus... | <a href="#">CDD</a> | <a href="#">UniProt</a> | <a href="#">Pfam</a> | <a href="#">InterPro</a> |  |

#### **REC-BcsA**



|                   |                          |                                               |                     |                         |                      |                          |                  |
|-------------------|--------------------------|-----------------------------------------------|---------------------|-------------------------|----------------------|--------------------------|------------------|
| Metbo_0838        | <a href="#">ADZ09088</a> | response regulator receiver protein [Metha... | <a href="#">CDD</a> | <a href="#">UniProt</a> | <a href="#">Pfam</a> | <a href="#">InterPro</a> | (REC-BcsA)       |
| <b>REC-MetOD1</b> |                          |                                               |                     |                         |                      |                          |                  |
| Metbo_0747        | <a href="#">ADZ08998</a> | response regulator receiver protein [Metha... | <a href="#">CDD</a> | <a href="#">UniProt</a> | <a href="#">Pfam</a> | <a href="#">InterPro</a> | (REC-MetOD1)     |
| Metbo_1099        | <a href="#">ADZ09344</a> | response regulator receiver protein [Metha... | <a href="#">CDD</a> | <a href="#">UniProt</a> | <a href="#">Pfam</a> | <a href="#">InterPro</a> | (REC-MetOD1)     |
| Metbo_1144        | <a href="#">ADZ09388</a> | putative PAS/PAC sensor protein [Methanoba... | <a href="#">CDD</a> | <a href="#">UniProt</a> | <a href="#">Pfam</a> | <a href="#">InterPro</a> | (REC-PAS-MetOD1) |
| <b>Other RRs</b>  |                          |                                               |                     |                         |                      |                          |                  |
| Metbo_1354        | <a href="#">ADZ09594</a> | response regulator receiver [Methanobacter... | <a href="#">CDD</a> | <a href="#">UniProt</a> | <a href="#">Pfam</a> | <a href="#">InterPro</a> | (REC-Smc)        |
| Metbo_1869        | <a href="#">ADZ10090</a> | response regulator receiver protein [Metha... | <a href="#">CDD</a> | <a href="#">UniProt</a> | <a href="#">Pfam</a> | <a href="#">InterPro</a> | (REC-MetOD4)     |
| Metbo_1895        | <a href="#">ADZ10115</a> | signal transduction histidine kinase [Meth... | <a href="#">CDD</a> | <a href="#">UniProt</a> | <a href="#">Pfam</a> | <a href="#">InterPro</a> | (REC-HisK-PAS)   |

### Methanobacterium paludis SWAN1

#### **HisK, no REC**

|            |                          |                                               |                     |                         |                      |                          |  |
|------------|--------------------------|-----------------------------------------------|---------------------|-------------------------|----------------------|--------------------------|--|
| MSWAN_0174 | <a href="#">AEG17220</a> | signal transduction histidine kinase [Meth... | <a href="#">CDD</a> | <a href="#">UniProt</a> | <a href="#">Pfam</a> | <a href="#">InterPro</a> |  |
| MSWAN_0184 | <a href="#">AEG17230</a> | signal transduction histidine kinase [Meth... | <a href="#">CDD</a> | <a href="#">UniProt</a> | <a href="#">Pfam</a> | <a href="#">InterPro</a> |  |
| MSWAN_0338 | <a href="#">AEG17382</a> | signal transduction histidine kinase [Meth... | <a href="#">CDD</a> | <a href="#">UniProt</a> | <a href="#">Pfam</a> | <a href="#">InterPro</a> |  |
| MSWAN_1140 | <a href="#">AEG18158</a> | signal transduction histidine kinase [Meth... | <a href="#">CDD</a> | <a href="#">UniProt</a> | <a href="#">Pfam</a> | <a href="#">InterPro</a> |  |
| MSWAN_1308 | <a href="#">AEG18325</a> | signal transduction histidine kinase [Meth... | <a href="#">CDD</a> | <a href="#">UniProt</a> | <a href="#">Pfam</a> | <a href="#">InterPro</a> |  |
| MSWAN_1334 | <a href="#">AEG18349</a> | signal transduction histidine kinase [Meth... | <a href="#">CDD</a> | <a href="#">UniProt</a> | <a href="#">Pfam</a> | <a href="#">InterPro</a> |  |
| MSWAN_1380 | <a href="#">AEG18394</a> | signal transduction histidine kinase [Meth... | <a href="#">CDD</a> | <a href="#">UniProt</a> | <a href="#">Pfam</a> | <a href="#">InterPro</a> |  |
| MSWAN_1544 | <a href="#">AEG18558</a> | signal transduction histidine kinase [Meth... | <a href="#">CDD</a> | <a href="#">UniProt</a> | <a href="#">Pfam</a> | <a href="#">InterPro</a> |  |
| MSWAN_1581 | <a href="#">AEG18594</a> | signal transduction histidine kinase [Meth... | <a href="#">CDD</a> | <a href="#">UniProt</a> | <a href="#">Pfam</a> | <a href="#">InterPro</a> |  |
| MSWAN_1892 | <a href="#">AEG18901</a> | signal transduction histidine kinase [Meth... | <a href="#">CDD</a> | <a href="#">UniProt</a> | <a href="#">Pfam</a> | <a href="#">InterPro</a> |  |

#### **REC only**

|            |                          |                                               |                     |                         |                      |                          |  |
|------------|--------------------------|-----------------------------------------------|---------------------|-------------------------|----------------------|--------------------------|--|
| MSWAN_0629 | <a href="#">AEG17665</a> | response regulator receiver [Methanobacter... | <a href="#">CDD</a> | <a href="#">UniProt</a> | <a href="#">Pfam</a> | <a href="#">InterPro</a> |  |
| MSWAN_0852 | <a href="#">AEG17879</a> | response regulator receiver [Methanobacter... | <a href="#">CDD</a> | <a href="#">UniProt</a> | <a href="#">Pfam</a> | <a href="#">InterPro</a> |  |
| MSWAN_1141 | <a href="#">AEG18159</a> | response regulator receiver protein [Metha... | <a href="#">CDD</a> | <a href="#">UniProt</a> | <a href="#">Pfam</a> | <a href="#">InterPro</a> |  |
| MSWAN_1161 | <a href="#">AEG18179</a> | response regulator receiver [Methanobacter... | <a href="#">CDD</a> | <a href="#">UniProt</a> | <a href="#">Pfam</a> | <a href="#">InterPro</a> |  |

#### **REC-PAS**

|            |                          |                                               |                     |                         |                      |                          |  |
|------------|--------------------------|-----------------------------------------------|---------------------|-------------------------|----------------------|--------------------------|--|
| MSWAN_0023 | <a href="#">AEG17071</a> | putative PAS/PAC sensor protein [Methanoba... | <a href="#">CDD</a> | <a href="#">UniProt</a> | <a href="#">Pfam</a> | <a href="#">InterPro</a> |  |
|------------|--------------------------|-----------------------------------------------|---------------------|-------------------------|----------------------|--------------------------|--|

#### **REC-MetOD1**

|            |                          |                                               |                     |                         |                      |                          |                  |
|------------|--------------------------|-----------------------------------------------|---------------------|-------------------------|----------------------|--------------------------|------------------|
| MSWAN_1059 | <a href="#">AEG18080</a> | putative PAS/PAC sensor protein [Methanoba... | <a href="#">CDD</a> | <a href="#">UniProt</a> | <a href="#">Pfam</a> | <a href="#">InterPro</a> | (REC-PAS-MetOD1) |
| MSWAN_1497 | <a href="#">AEG18511</a> | response regulator receiver protein [Metha... | <a href="#">CDD</a> | <a href="#">UniProt</a> | <a href="#">Pfam</a> | <a href="#">InterPro</a> | (REC-MetOD1)     |

### Methanobacterium sp. MB1

#### **HisK, no REC**

|             |                          |                                               |                     |                         |                      |                          |  |
|-------------|--------------------------|-----------------------------------------------|---------------------|-------------------------|----------------------|--------------------------|--|
| *MBMB1_0321 | <a href="#">CDG64431</a> | hypothetical protein MBMB1_0321 [Methanoba... | <a href="#">CDD</a> | <a href="#">UniProt</a> | <a href="#">Pfam</a> | <a href="#">InterPro</a> |  |
| MBMB1_0322  | <a href="#">CDG64432</a> | hypothetical protein MBMB1_0322 [Methanoba... | <a href="#">CDD</a> | <a href="#">UniProt</a> | <a href="#">Pfam</a> | <a href="#">InterPro</a> |  |
| MBMB1_0533  | <a href="#">CDG64640</a> | hypothetical protein MBMB1_0533 [Methanoba... | <a href="#">CDD</a> | <a href="#">UniProt</a> | <a href="#">Pfam</a> | <a href="#">InterPro</a> |  |
| MBMB1_0598  | <a href="#">CDG64705</a> | signal transduction histidine kinase [Meth... | <a href="#">CDD</a> | <a href="#">UniProt</a> | <a href="#">Pfam</a> | <a href="#">InterPro</a> |  |
| MBMB1_0705  | <a href="#">CDG64809</a> | hypothetical protein MBMB1_0705 [Methanoba... | <a href="#">CDD</a> | <a href="#">UniProt</a> | <a href="#">Pfam</a> | <a href="#">InterPro</a> |  |
| MBMB1_0843  | <a href="#">CDG64946</a> | hypothetical protein MBMB1_0843 [Methanoba... | <a href="#">CDD</a> | <a href="#">UniProt</a> | <a href="#">Pfam</a> | <a href="#">InterPro</a> |  |
| MBMB1_0850  | <a href="#">CDG64953</a> | hypothetical protein MBMB1_0850 [Methanoba... | <a href="#">CDD</a> | <a href="#">UniProt</a> | <a href="#">Pfam</a> | <a href="#">InterPro</a> |  |
| MBMB1_0873  | <a href="#">CDG64975</a> | hypothetical protein MBMB1_0873 [Methanoba... | <a href="#">CDD</a> | <a href="#">UniProt</a> | <a href="#">Pfam</a> | <a href="#">InterPro</a> |  |
| MBMB1_0981  | <a href="#">CDG65083</a> | hypothetical protein MBMB1_0981 [Methanoba... | <a href="#">CDD</a> | <a href="#">UniProt</a> | <a href="#">Pfam</a> | <a href="#">InterPro</a> |  |
| MBMB1_1027  | <a href="#">CDG65128</a> | hypothetical protein MBMB1_1027 [Methanoba... | <a href="#">CDD</a> | <a href="#">UniProt</a> | <a href="#">Pfam</a> | <a href="#">InterPro</a> |  |
| MBMB1_1035  | <a href="#">CDG65136</a> | hypothetical protein MBMB1_1035 [Methanoba... | <a href="#">CDD</a> | <a href="#">UniProt</a> | <a href="#">Pfam</a> | <a href="#">InterPro</a> |  |
| MBMB1_1140  | <a href="#">CDG65241</a> | hypothetical protein MBMB1_1140 [Methanoba... | <a href="#">CDD</a> | <a href="#">UniProt</a> | <a href="#">Pfam</a> | <a href="#">InterPro</a> |  |
| MBMB1_1198  | <a href="#">CDG65298</a> | sensory transduction histidine kinase [Met... | <a href="#">CDD</a> | <a href="#">UniProt</a> | <a href="#">Pfam</a> | <a href="#">InterPro</a> |  |
| MBMB1_1523  | <a href="#">CDG65617</a> | hypothetical protein MBMB1_1523 [Methanoba... | <a href="#">CDD</a> | <a href="#">UniProt</a> | <a href="#">Pfam</a> | <a href="#">InterPro</a> |  |
| MBMB1_1793  | <a href="#">CDG65872</a> | hypothetical protein MBMB1_1793 [Methanoba... | <a href="#">CDD</a> | <a href="#">UniProt</a> | <a href="#">Pfam</a> | <a href="#">InterPro</a> |  |

#### **REC only**

|             |                          |                                               |                     |                         |                      |                          |  |
|-------------|--------------------------|-----------------------------------------------|---------------------|-------------------------|----------------------|--------------------------|--|
| MBMB1_0017  | <a href="#">CDG64137</a> | hypothetical protein MBMB1_0017 [Methanoba... | <a href="#">CDD</a> | <a href="#">UniProt</a> | <a href="#">Pfam</a> | <a href="#">InterPro</a> |  |
| MBMB1_0416  | <a href="#">CDG64526</a> | putative PAS/PAC sensor protein [Methanoba... | <a href="#">CDD</a> | <a href="#">UniProt</a> | <a href="#">Pfam</a> | <a href="#">InterPro</a> |  |
| MBMB1_0721  | <a href="#">CDG64825</a> | hypothetical protein MBMB1_0721 [Methanoba... | <a href="#">CDD</a> | <a href="#">UniProt</a> | <a href="#">Pfam</a> | <a href="#">InterPro</a> |  |
| MBMB1_0849  | <a href="#">CDG64952</a> | hypothetical protein MBMB1_0849 [Methanoba... | <a href="#">CDD</a> | <a href="#">UniProt</a> | <a href="#">Pfam</a> | <a href="#">InterPro</a> |  |
| MBMB1_0872  | <a href="#">CDG64974</a> | response regulator receiver protein [Metha... | <a href="#">CDD</a> | <a href="#">UniProt</a> | <a href="#">Pfam</a> | <a href="#">InterPro</a> |  |
| MBMB1_1199  | <a href="#">CDG65299</a> | response regulator receiver protein [Metha... | <a href="#">CDD</a> | <a href="#">UniProt</a> | <a href="#">Pfam</a> | <a href="#">InterPro</a> |  |
| MBMB1_1401  | <a href="#">CDG65499</a> | hypothetical protein MBMB1_1401 [Methanoba... | <a href="#">CDD</a> | <a href="#">UniProt</a> | <a href="#">Pfam</a> | <a href="#">InterPro</a> |  |
| *MBMB1_1402 | <a href="#">CDG65500</a> | hypothetical protein MBMB1_1402 [Methanoba... | <a href="#">CDD</a> | <a href="#">UniProt</a> | <a href="#">Pfam</a> | <a href="#">InterPro</a> |  |

#### **REC-HisK**

|            |                          |                                               |                     |                         |                      |                          |  |
|------------|--------------------------|-----------------------------------------------|---------------------|-------------------------|----------------------|--------------------------|--|
| MBMB1_0158 | <a href="#">CDG64277</a> | signal transduction histidine kinase [Meth... | <a href="#">CDD</a> | <a href="#">UniProt</a> | <a href="#">Pfam</a> | <a href="#">InterPro</a> |  |
| MBMB1_0726 | <a href="#">CDG64830</a> | hypothetical protein MBMB1_0726 [Methanoba... | <a href="#">CDD</a> | <a href="#">UniProt</a> | <a href="#">Pfam</a> | <a href="#">InterPro</a> |  |
| MBMB1_1200 | <a href="#">CDG65300</a> | sensory transduction regulatory protein [M... | <a href="#">CDD</a> | <a href="#">UniProt</a> | <a href="#">Pfam</a> | <a href="#">InterPro</a> |  |
| MBMB1_2041 | <a href="#">CDG66115</a> | hypothetical protein MBMB1_2041 [Methanoba... | <a href="#">CDD</a> | <a href="#">UniProt</a> | <a href="#">Pfam</a> | <a href="#">InterPro</a> |  |

#### **REC-PAS**

|            |                          |                                               |                     |                         |                      |                          |  |
|------------|--------------------------|-----------------------------------------------|---------------------|-------------------------|----------------------|--------------------------|--|
| MBMB1_0016 | <a href="#">CDG64136</a> | PAS/PAC sensor protein [Methanobacterium s... | <a href="#">CDD</a> | <a href="#">UniProt</a> | <a href="#">Pfam</a> | <a href="#">InterPro</a> |  |
| MBMB1_0871 | <a href="#">CDG64973</a> | putative PAS/PAC sensor protein [Methanoba... | <a href="#">CDD</a> | <a href="#">UniProt</a> | <a href="#">Pfam</a> | <a href="#">InterPro</a> |  |
| MBMB1_1794 | <a href="#">CDG65873</a> | hypothetical protein MBMB1_1794 [Methanoba... | <a href="#">CDD</a> | <a href="#">UniProt</a> | <a href="#">Pfam</a> | <a href="#">InterPro</a> |  |

#### **REC-BcsA**

|            |                          |                                               |                     |                         |                      |                          |            |
|------------|--------------------------|-----------------------------------------------|---------------------|-------------------------|----------------------|--------------------------|------------|
| MBMB1_0720 | <a href="#">CDG64824</a> | sensory transduction regulatory protein [M... | <a href="#">CDD</a> | <a href="#">UniProt</a> | <a href="#">Pfam</a> | <a href="#">InterPro</a> | (REC-BcsA) |
|------------|--------------------------|-----------------------------------------------|---------------------|-------------------------|----------------------|--------------------------|------------|

#### **REC-GAF-PAS**

|            |                          |                                               |                     |                         |                      |                          |  |
|------------|--------------------------|-----------------------------------------------|---------------------|-------------------------|----------------------|--------------------------|--|
| MBMB1_0980 | <a href="#">CDG65082</a> | hypothetical protein MBMB1_0980 [Methanoba... | <a href="#">CDD</a> | <a href="#">UniProt</a> | <a href="#">Pfam</a> | <a href="#">InterPro</a> |  |
|------------|--------------------------|-----------------------------------------------|---------------------|-------------------------|----------------------|--------------------------|--|

#### **REC-MetOD1**

|            |                          |                                               |                     |                         |                      |                          |                  |
|------------|--------------------------|-----------------------------------------------|---------------------|-------------------------|----------------------|--------------------------|------------------|
| MBMB1_1193 | <a href="#">CDG65293</a> | PAS/PAC sensor protein [Methanobacterium s... | <a href="#">CDD</a> | <a href="#">UniProt</a> | <a href="#">Pfam</a> | <a href="#">InterPro</a> | (REC-PAS-MetOD1) |
| MBMB1_1201 | <a href="#">CDG65301</a> | response regulator receiver protein [Metha... | <a href="#">CDD</a> | <a href="#">UniProt</a> | <a href="#">Pfam</a> | <a href="#">InterPro</a> | (REC-MetOD1)     |

### Methanobrevibacter millerae

#### HisK, no REC

|                 |                          |                                               |                     |                         |                      |                                     |
|-----------------|--------------------------|-----------------------------------------------|---------------------|-------------------------|----------------------|-------------------------------------|
| sm9_0230        | <a href="#">ALT68035</a> | signal transduction histidine kinase [Meth... | <a href="#">CDD</a> | <a href="#">UniProt</a> | <a href="#">Pfam</a> | <a href="#">InterPro</a>            |
| sm9_1617        | <a href="#">ALT69385</a> | signal transduction histidine kinase [Meth... | <a href="#">CDD</a> | <a href="#">UniProt</a> | <a href="#">Pfam</a> | <a href="#">InterPro</a>            |
| sm9_1618        | <a href="#">ALT69386</a> | signal transduction histidine kinase [Meth... | <a href="#">CDD</a> | <a href="#">UniProt</a> | <a href="#">Pfam</a> | <a href="#">InterPro</a>            |
| <b>REC only</b> |                          |                                               |                     |                         |                      |                                     |
| sm9_1619        | <a href="#">ALT69387</a> | response regulator receiver domain-contain... | <a href="#">CDD</a> | <a href="#">UniProt</a> | <a href="#">Pfam</a> | <a href="#">InterPro</a>            |
| <b>REC-BcsA</b> |                          |                                               |                     |                         |                      |                                     |
| sm9_1620        | <a href="#">ALT69388</a> | glycosyl transferase GT2 family with respo... | <a href="#">CDD</a> | <a href="#">UniProt</a> | <a href="#">Pfam</a> | <a href="#">InterPro</a> (REC-BcsA) |

---

### Methanobrevibacter sp. AbM4

#### HisK, no REC

|                 |                          |                                               |                     |                         |                      |                                     |
|-----------------|--------------------------|-----------------------------------------------|---------------------|-------------------------|----------------------|-------------------------------------|
| Abm4_0570       | <a href="#">AGN16467</a> | two-component system histidine kinase [Met... | <a href="#">CDD</a> | <a href="#">UniProt</a> | <a href="#">Pfam</a> | <a href="#">InterPro</a>            |
| <b>REC only</b> |                          |                                               |                     |                         |                      |                                     |
| Abm4_0571       | <a href="#">AGN16468</a> | two-component system response regulator [M... | <a href="#">CDD</a> | <a href="#">UniProt</a> | <a href="#">Pfam</a> | <a href="#">InterPro</a>            |
| Abm4_0572       | <a href="#">AGN16469</a> | response regulator domain-containing prote... | <a href="#">CDD</a> | <a href="#">UniProt</a> | <a href="#">Pfam</a> | <a href="#">InterPro</a>            |
| <b>REC-BcsA</b> |                          |                                               |                     |                         |                      |                                     |
| Abm4_0589       | <a href="#">AGN16484</a> | response regulator/glycosyl transferase GT... | <a href="#">CDD</a> | <a href="#">UniProt</a> | <a href="#">Pfam</a> | <a href="#">InterPro</a> (REC-BcsA) |
| Abm4_0573       | <a href="#">AGN16470</a> | response regulator/glycosyl transferase GT... | <a href="#">CDD</a> | <a href="#">UniProt</a> | <a href="#">Pfam</a> | <a href="#">InterPro</a> (REC-BcsA) |

---

### Methanocaldococcus bathoardescens

#### HisK, no REC

|                 |                          |                                               |                     |                         |                      |                          |
|-----------------|--------------------------|-----------------------------------------------|---------------------|-------------------------|----------------------|--------------------------|
| JH146_0930      | <a href="#">AIJ05775</a> | CheA signal transduction histidine kinase ... | <a href="#">CDD</a> | <a href="#">UniProt</a> | <a href="#">Pfam</a> | <a href="#">InterPro</a> |
| <b>REC only</b> |                          |                                               |                     |                         |                      |                          |
| JH146_0940      | <a href="#">AIJ05785</a> | response regulator receiver protein [Metha... | <a href="#">CDD</a> | <a href="#">UniProt</a> | <a href="#">Pfam</a> | <a href="#">InterPro</a> |
| <b>REC-CheB</b> |                          |                                               |                     |                         |                      |                          |
| JH146_0932      | <a href="#">AIJ05777</a> | response regulator receiver modulated CheB... | <a href="#">CDD</a> | <a href="#">UniProt</a> | <a href="#">Pfam</a> | <a href="#">InterPro</a> |

---

### Methanocaldococcus fervens AG86

#### HisK, no REC

|                 |                          |                                               |                     |                         |                      |                          |
|-----------------|--------------------------|-----------------------------------------------|---------------------|-------------------------|----------------------|--------------------------|
| Mefer_0640      | <a href="#">ACV24459</a> | CheA signal transduction histidine kinase ... | <a href="#">CDD</a> | <a href="#">UniProt</a> | <a href="#">Pfam</a> | <a href="#">InterPro</a> |
| Mefer_0648      | <a href="#">ACV24467</a> | integral membrane sensor signal transducti... | <a href="#">CDD</a> | <a href="#">UniProt</a> | <a href="#">Pfam</a> | <a href="#">InterPro</a> |
| <b>REC only</b> |                          |                                               |                     |                         |                      |                          |
| Mefer_0647      | <a href="#">ACV24466</a> | response regulator receiver protein [Metha... | <a href="#">CDD</a> | <a href="#">UniProt</a> | <a href="#">Pfam</a> | <a href="#">InterPro</a> |
| Mefer_1110      | <a href="#">ACV24921</a> | response regulator receiver protein [Metha... | <a href="#">CDD</a> | <a href="#">UniProt</a> | <a href="#">Pfam</a> | <a href="#">InterPro</a> |
| <b>REC-CheB</b> |                          |                                               |                     |                         |                      |                          |
| Mefer_0641      | <a href="#">ACV24460</a> | response regulator receiver modulated CheB... | <a href="#">CDD</a> | <a href="#">UniProt</a> | <a href="#">Pfam</a> | <a href="#">InterPro</a> |

---

### Methanocaldococcus infernus ME

#### HisK, no REC

|                 |                          |                                               |                     |                         |                      |                          |
|-----------------|--------------------------|-----------------------------------------------|---------------------|-------------------------|----------------------|--------------------------|
| Metin_0774      | <a href="#">ADG13440</a> | CheA signal transduction histidine kinase ... | <a href="#">CDD</a> | <a href="#">UniProt</a> | <a href="#">Pfam</a> | <a href="#">InterPro</a> |
| <b>REC only</b> |                          |                                               |                     |                         |                      |                          |
| Metin_0247      | <a href="#">ADG12917</a> | response regulator receiver protein [Metha... | <a href="#">CDD</a> | <a href="#">UniProt</a> | <a href="#">Pfam</a> | <a href="#">InterPro</a> |
| <b>REC-CheB</b> |                          |                                               |                     |                         |                      |                          |
| Metin_0773      | <a href="#">ADG13439</a> | response regulator receiver protein [Metha... | <a href="#">CDD</a> | <a href="#">UniProt</a> | <a href="#">Pfam</a> | <a href="#">InterPro</a> |

---

### Methanocaldococcus sp. FS406-22

#### HisK, no REC

|                 |                          |                                            |                     |                         |                      |                          |
|-----------------|--------------------------|--------------------------------------------|---------------------|-------------------------|----------------------|--------------------------|
| MFS40622_0241   | <a href="#">ADC68937</a> | integral membrane sensor signal transdu... | <a href="#">CDD</a> | <a href="#">UniProt</a> | <a href="#">Pfam</a> | <a href="#">InterPro</a> |
| <b>REC only</b> |                          |                                            |                     |                         |                      |                          |
| MFS40622_0242   | <a href="#">ADC68938</a> | response regulator receiver protein [Me... | <a href="#">CDD</a> | <a href="#">UniProt</a> | <a href="#">Pfam</a> | <a href="#">InterPro</a> |

---

### Methanocaldococcus vulcanius M7

#### HisK, no REC

|                 |                          |                                               |                     |                         |                      |                          |
|-----------------|--------------------------|-----------------------------------------------|---------------------|-------------------------|----------------------|--------------------------|
| Metvu_0258      | <a href="#">ACX72125</a> | CheA signal transduction histidine kinase ... | <a href="#">CDD</a> | <a href="#">UniProt</a> | <a href="#">Pfam</a> | <a href="#">InterPro</a> |
| <b>REC only</b> |                          |                                               |                     |                         |                      |                          |
| Metvu_1497      | <a href="#">ACX73350</a> | response regulator receiver protein [Metha... | <a href="#">CDD</a> | <a href="#">UniProt</a> | <a href="#">Pfam</a> | <a href="#">InterPro</a> |
| <b>REC-CheB</b> |                          |                                               |                     |                         |                      |                          |
| Metvu_0257      | <a href="#">ACX72124</a> | chemotaxis response regulator protein-glut... | <a href="#">CDD</a> | <a href="#">UniProt</a> | <a href="#">Pfam</a> | <a href="#">InterPro</a> |

---

### Methanocella arvoryzae MRE50

#### HisK, no REC

|        |                          |                                               |                     |                         |                      |                          |
|--------|--------------------------|-----------------------------------------------|---------------------|-------------------------|----------------------|--------------------------|
| LRC113 | <a href="#">CAJ35133</a> | predicted signal transduction histidine ki... | <a href="#">CDD</a> | <a href="#">UniProt</a> | <a href="#">Pfam</a> | <a href="#">InterPro</a> |
| LRC120 | <a href="#">CAJ35139</a> | predicted signal transduction histidine ki... | <a href="#">CDD</a> | <a href="#">UniProt</a> | <a href="#">Pfam</a> | <a href="#">InterPro</a> |
| LRC135 | <a href="#">CAJ35150</a> | predicted signal transduction histidine ki... | <a href="#">CDD</a> | <a href="#">UniProt</a> | <a href="#">Pfam</a> | <a href="#">InterPro</a> |
| LRC318 | <a href="#">CAJ35292</a> | putative signal transduction histidine kin... | <a href="#">CDD</a> | <a href="#">UniProt</a> | <a href="#">Pfam</a> | <a href="#">InterPro</a> |
| LRC339 | <a href="#">CAJ35311</a> | putative signal transduction histidine kin... | <a href="#">CDD</a> | <a href="#">UniProt</a> | <a href="#">Pfam</a> | <a href="#">InterPro</a> |
| LRC393 | <a href="#">CAJ35355</a> | predicted signal transduction histidine ki... | <a href="#">CDD</a> | <a href="#">UniProt</a> | <a href="#">Pfam</a> | <a href="#">InterPro</a> |
| LRC522 | <a href="#">CAJ35461</a> | putative signal transduction histidine kin... | <a href="#">CDD</a> | <a href="#">UniProt</a> | <a href="#">Pfam</a> | <a href="#">InterPro</a> |
| LRC571 | <a href="#">CAJ35501</a> | chemotaxis histidine kinase [Methanocella ... | <a href="#">CDD</a> | <a href="#">UniProt</a> | <a href="#">Pfam</a> | <a href="#">InterPro</a> |
| LRC596 | <a href="#">CAJ35520</a> | predicted signal transduction histidine ki... | <a href="#">CDD</a> | <a href="#">UniProt</a> | <a href="#">Pfam</a> | <a href="#">InterPro</a> |
| RCIX2  | <a href="#">CAJ35524</a> | predicted signal transduction histidine ki... | <a href="#">CDD</a> | <a href="#">UniProt</a> | <a href="#">Pfam</a> | <a href="#">InterPro</a> |

|                    |                          |                                                  |                     |                         |                      |                                        |
|--------------------|--------------------------|--------------------------------------------------|---------------------|-------------------------|----------------------|----------------------------------------|
| RCIX121            | <a href="#">CAJ35620</a> | predicted signal transduction histidine ki...    | <a href="#">CDD</a> | <a href="#">UniProt</a> | <a href="#">Pfam</a> | <a href="#">InterPro</a>               |
| RCIX156            | <a href="#">CAJ35647</a> | predicted signal transduction histidine ki...    | <a href="#">CDD</a> | <a href="#">UniProt</a> | <a href="#">Pfam</a> | <a href="#">InterPro</a>               |
| RCIX160            | <a href="#">CAJ35650</a> | predicted signal transduction histidine ki...    | <a href="#">CDD</a> | <a href="#">UniProt</a> | <a href="#">Pfam</a> | <a href="#">InterPro</a>               |
| RCIX170            | <a href="#">CAJ35658</a> | predicted signal transduction histidine ki...    | <a href="#">CDD</a> | <a href="#">UniProt</a> | <a href="#">Pfam</a> | <a href="#">InterPro</a>               |
| RCIX420            | <a href="#">CAJ35860</a> | predicted signal transduction histidine ki...    | <a href="#">CDD</a> | <a href="#">UniProt</a> | <a href="#">Pfam</a> | <a href="#">InterPro</a>               |
| RCIX484            | <a href="#">CAJ35913</a> | putative signal transduction histidine kin...    | <a href="#">CDD</a> | <a href="#">UniProt</a> | <a href="#">Pfam</a> | <a href="#">InterPro</a>               |
| RCIX485            | <a href="#">CAJ35914</a> | putative signal transduction histidine kin...    | <a href="#">CDD</a> | <a href="#">UniProt</a> | <a href="#">Pfam</a> | <a href="#">InterPro</a>               |
| RCIX512            | <a href="#">CAJ35938</a> | putative signal transduction histidine kin...    | <a href="#">CDD</a> | <a href="#">UniProt</a> | <a href="#">Pfam</a> | <a href="#">InterPro</a>               |
| RCIX604            | <a href="#">CAJ36011</a> | putative signal transduction histidine kin...    | <a href="#">CDD</a> | <a href="#">UniProt</a> | <a href="#">Pfam</a> | <a href="#">InterPro</a>               |
| RCIX850            | <a href="#">CAJ36211</a> | putative signal transduction histidine kin...    | <a href="#">CDD</a> | <a href="#">UniProt</a> | <a href="#">Pfam</a> | <a href="#">InterPro</a>               |
| RCIX980            | <a href="#">CAJ36316</a> | putative signal transduction histidine kin...    | <a href="#">CDD</a> | <a href="#">UniProt</a> | <a href="#">Pfam</a> | <a href="#">InterPro</a>               |
| RCIX1081           | <a href="#">CAJ36399</a> | predicted signal transduction histidine ki...    | <a href="#">CDD</a> | <a href="#">UniProt</a> | <a href="#">Pfam</a> | <a href="#">InterPro</a>               |
| RCIX1082           | <a href="#">CAJ36400</a> | putative signal transduction histidine kin...    | <a href="#">CDD</a> | <a href="#">UniProt</a> | <a href="#">Pfam</a> | <a href="#">InterPro</a>               |
| RCIX1084           | <a href="#">CAJ36401</a> | putative signal transduction histidine kin...    | <a href="#">CDD</a> | <a href="#">UniProt</a> | <a href="#">Pfam</a> | <a href="#">InterPro</a>               |
| RCIX1160           | <a href="#">CAJ36480</a> | putative signal transduction histidine kin...    | <a href="#">CDD</a> | <a href="#">UniProt</a> | <a href="#">Pfam</a> | <a href="#">InterPro</a>               |
| RCIX1237           | <a href="#">CAJ36539</a> | putative signal transduction histidine kin...    | <a href="#">CDD</a> | <a href="#">UniProt</a> | <a href="#">Pfam</a> | <a href="#">InterPro</a>               |
| RCIX1277           | <a href="#">CAJ36574</a> | predicted signal transduction histidine ki...    | <a href="#">CDD</a> | <a href="#">UniProt</a> | <a href="#">Pfam</a> | <a href="#">InterPro</a>               |
| RCIX1290           | <a href="#">CAJ36583</a> | predicted signal transduction histidine ki...    | <a href="#">CDD</a> | <a href="#">UniProt</a> | <a href="#">Pfam</a> | <a href="#">InterPro</a>               |
| RCIX1688           | <a href="#">CAJ36909</a> | putative signal transduction histidine kin...    | <a href="#">CDD</a> | <a href="#">UniProt</a> | <a href="#">Pfam</a> | <a href="#">InterPro</a>               |
| RCIX1713           | <a href="#">CAJ36932</a> | putative signal transduction histidine kin...    | <a href="#">CDD</a> | <a href="#">UniProt</a> | <a href="#">Pfam</a> | <a href="#">InterPro</a>               |
| RCIX1753           | <a href="#">CAJ36961</a> | putative signal transduction histidine kin...    | <a href="#">CDD</a> | <a href="#">UniProt</a> | <a href="#">Pfam</a> | <a href="#">InterPro</a>               |
| RCIX1976           | <a href="#">CAJ37138</a> | signal transduction serine/threonine kinas...    | <a href="#">CDD</a> | <a href="#">UniProt</a> | <a href="#">Pfam</a> | <a href="#">InterPro</a>               |
| RCIX2013           | <a href="#">CAJ37166</a> | putative signal transduction histidine kin...    | <a href="#">CDD</a> | <a href="#">UniProt</a> | <a href="#">Pfam</a> | <a href="#">InterPro</a>               |
| RCIX2191           | <a href="#">CAJ37312</a> | putative signal transduction histidine kin...    | <a href="#">CDD</a> | <a href="#">UniProt</a> | <a href="#">Pfam</a> | <a href="#">InterPro</a>               |
| RCIX2208           | <a href="#">CAJ37327</a> | putative signal transduction histidine kin...    | <a href="#">CDD</a> | <a href="#">UniProt</a> | <a href="#">Pfam</a> | <a href="#">InterPro</a>               |
| RCIX2210           | <a href="#">CAJ37329</a> | putative signal transduction histidine kin...    | <a href="#">CDD</a> | <a href="#">UniProt</a> | <a href="#">Pfam</a> | <a href="#">InterPro</a>               |
| RCIX2211           | <a href="#">CAJ37330</a> | putative signal transduction histidine kin...    | <a href="#">CDD</a> | <a href="#">UniProt</a> | <a href="#">Pfam</a> | <a href="#">InterPro</a>               |
| RRC13              | <a href="#">CAJ37807</a> | putative signal transduction histidine kin...    | <a href="#">CDD</a> | <a href="#">UniProt</a> | <a href="#">Pfam</a> | <a href="#">InterPro</a>               |
| RRC48              | <a href="#">CAJ37831</a> | putative signal transduction histidine kin...    | <a href="#">CDD</a> | <a href="#">UniProt</a> | <a href="#">Pfam</a> | <a href="#">InterPro</a>               |
| RRC186             | <a href="#">CAJ37936</a> | putative signal transduction histidine kin...    | <a href="#">CDD</a> | <a href="#">UniProt</a> | <a href="#">Pfam</a> | <a href="#">InterPro</a>               |
| RRC192             | <a href="#">CAJ37939</a> | putative signal transduction histidine kin...    | <a href="#">CDD</a> | <a href="#">UniProt</a> | <a href="#">Pfam</a> | <a href="#">InterPro</a>               |
| RRC193             | <a href="#">CAJ37940</a> | putative signal transduction histidine kin...    | <a href="#">CDD</a> | <a href="#">UniProt</a> | <a href="#">Pfam</a> | <a href="#">InterPro</a>               |
| RRC194             | <a href="#">CAJ37941</a> | putative signal transduction histidine kin...    | <a href="#">CDD</a> | <a href="#">UniProt</a> | <a href="#">Pfam</a> | <a href="#">InterPro</a>               |
| RRC287             | <a href="#">CAJ38021</a> | predicted signal transduction receptor [Me...    | <a href="#">CDD</a> | <a href="#">UniProt</a> | <a href="#">Pfam</a> | <a href="#">InterPro</a>               |
| RRC477             | <a href="#">CAJ38171</a> | putative signal transduction histidine kin...    | <a href="#">CDD</a> | <a href="#">UniProt</a> | <a href="#">Pfam</a> | <a href="#">InterPro</a>               |
| <b>REC only</b>    |                          |                                                  |                     |                         |                      |                                        |
| LRC569             | <a href="#">CAJ35499</a> | chemotaxis response regulator [Methanocell...    | <a href="#">CDD</a> | <a href="#">UniProt</a> | <a href="#">Pfam</a> | <a href="#">InterPro</a>               |
| LRC597             | <a href="#">CAJ35521</a> | hypothetical protein LRC597 [Methanocella ...    | <a href="#">CDD</a> | <a href="#">UniProt</a> | <a href="#">Pfam</a> | <a href="#">InterPro</a>               |
| RRC476             | <a href="#">CAJ38170</a> | putative response regulator (CheY-like) [M...    | <a href="#">CDD</a> | <a href="#">UniProt</a> | <a href="#">Pfam</a> | <a href="#">InterPro</a>               |
| RRC490             | <a href="#">CAJ38182</a> | two-component system response regulator [M...    | <a href="#">CDD</a> | <a href="#">UniProt</a> | <a href="#">Pfam</a> | <a href="#">InterPro</a>               |
| RCIX443            | <a href="#">CAJ35876</a> | putative response regulator (CheY-like) [M...    | <a href="#">CDD</a> | <a href="#">UniProt</a> | <a href="#">Pfam</a> | <a href="#">InterPro</a>               |
| RCIX1840           | <a href="#">CAJ37025</a> | putative response regulator (CheY-like) [M...    | <a href="#">CDD</a> | <a href="#">UniProt</a> | <a href="#">Pfam</a> | <a href="#">InterPro</a>               |
| RCIX2162           | <a href="#">CAJ37286</a> | putative response regulator (CheY-like) [M...    | <a href="#">CDD</a> | <a href="#">UniProt</a> | <a href="#">Pfam</a> | <a href="#">InterPro</a>               |
| RCIX2509           | <a href="#">CAJ37575</a> | predicted response regulator [Methanocella...    | <a href="#">CDD</a> | <a href="#">UniProt</a> | <a href="#">Pfam</a> | <a href="#">InterPro</a>               |
| RCIX2510           | <a href="#">CAJ37576</a> | predicted response regulator [Methanocella...    | <a href="#">CDD</a> | <a href="#">UniProt</a> | <a href="#">Pfam</a> | <a href="#">InterPro</a>               |
| <b>REC-CheB</b>    |                          |                                                  |                     |                         |                      |                                        |
| LRC570             | <a href="#">CAJ35500</a> | chemotaxis methyltransferase [Methanocella ar... | <a href="#">CDD</a> | <a href="#">UniProt</a> | <a href="#">Pfam</a> | <a href="#">InterPro</a>               |
| <b>REC-PAS/GAF</b> |                          |                                                  |                     |                         |                      |                                        |
| RRC407             | <a href="#">CAJ38113</a> | putative signal transduction protein [Meth...    | <a href="#">CDD</a> | <a href="#">UniProt</a> | <a href="#">Pfam</a> | <a href="#">InterPro</a>               |
| <b>Other RRs</b>   |                          |                                                  |                     |                         |                      |                                        |
| RCIX981            | <a href="#">CAJ36317</a> | putative signal transduction protein [Meth...    | <a href="#">CDD</a> | <a href="#">UniProt</a> | <a href="#">Pfam</a> | <a href="#">InterPro</a> (REC-PAS-GAF- |
| DUF835)            |                          |                                                  |                     |                         |                      |                                        |
| RCIX1890           | <a href="#">CAJ37065</a> | putative response regulator [Methanocella ...    | <a href="#">CDD</a> | <a href="#">UniProt</a> | <a href="#">Pfam</a> | <a href="#">InterPro</a> (REC-MetOD2)  |
| RCIX2113           | <a href="#">CAJ37246</a> | putative signal transduction protein [Meth...    | <a href="#">CDD</a> | <a href="#">UniProt</a> | <a href="#">Pfam</a> | <a href="#">InterPro</a> (REC-PAS-GAF- |
| DUF835)            |                          |                                                  |                     |                         |                      |                                        |

### Methanocella conradii HZ254

#### **HisK, no REC**

|          |                          |                                               |                     |                         |                      |                          |
|----------|--------------------------|-----------------------------------------------|---------------------|-------------------------|----------------------|--------------------------|
| Mtc_0427 | <a href="#">AFC99194</a> | putative PAS sensor signal transduction hi... | <a href="#">CDD</a> | <a href="#">UniProt</a> | <a href="#">Pfam</a> | <a href="#">InterPro</a> |
| Mtc_0845 | <a href="#">AFC99606</a> | GAF sensor signal transduction histidine k... | <a href="#">CDD</a> | <a href="#">UniProt</a> | <a href="#">Pfam</a> | <a href="#">InterPro</a> |
| Mtc_1041 | <a href="#">AFC99797</a> | Putative signal transduction histidine kin... | <a href="#">CDD</a> | <a href="#">UniProt</a> | <a href="#">Pfam</a> | <a href="#">InterPro</a> |
| Mtc_1115 | <a href="#">AFC99871</a> | Putative signal transduction histidine kin... | <a href="#">CDD</a> | <a href="#">UniProt</a> | <a href="#">Pfam</a> | <a href="#">InterPro</a> |
| Mtc_1316 | <a href="#">AFD00070</a> | putative PAS sensor signal transduction hi... | <a href="#">CDD</a> | <a href="#">UniProt</a> | <a href="#">Pfam</a> | <a href="#">InterPro</a> |
| Mtc_1320 | <a href="#">AFD00074</a> | putative PAS sensor signal transduction hi... | <a href="#">CDD</a> | <a href="#">UniProt</a> | <a href="#">Pfam</a> | <a href="#">InterPro</a> |
| Mtc_1498 | <a href="#">AFD00250</a> | Putative signal transduction histidine kin... | <a href="#">CDD</a> | <a href="#">UniProt</a> | <a href="#">Pfam</a> | <a href="#">InterPro</a> |
| Mtc_1573 | <a href="#">AFD00325</a> | putative PAS sensor signal transduction hi... | <a href="#">CDD</a> | <a href="#">UniProt</a> | <a href="#">Pfam</a> | <a href="#">InterPro</a> |
| Mtc_1616 | <a href="#">AFD00366</a> | Putative signal transduction histidine kin... | <a href="#">CDD</a> | <a href="#">UniProt</a> | <a href="#">Pfam</a> | <a href="#">InterPro</a> |
| Mtc_1630 | <a href="#">AFD00379</a> | putative PAS sensor signal transduction hi... | <a href="#">CDD</a> | <a href="#">UniProt</a> | <a href="#">Pfam</a> | <a href="#">InterPro</a> |
| Mtc_1919 | <a href="#">AFD00659</a> | Putative signal transduction histidine kin... | <a href="#">CDD</a> | <a href="#">UniProt</a> | <a href="#">Pfam</a> | <a href="#">InterPro</a> |
| Mtc_1951 | <a href="#">AFD00691</a> | putative PAS sensor signal transduction hi... | <a href="#">CDD</a> | <a href="#">UniProt</a> | <a href="#">Pfam</a> | <a href="#">InterPro</a> |
| Mtc_2005 | <a href="#">AFD00745</a> | putative PAS sensor signal transduction hi... | <a href="#">CDD</a> | <a href="#">UniProt</a> | <a href="#">Pfam</a> | <a href="#">InterPro</a> |
| Mtc_2045 | <a href="#">AFD00784</a> | Putative signal transduction histidine kin... | <a href="#">CDD</a> | <a href="#">UniProt</a> | <a href="#">Pfam</a> | <a href="#">InterPro</a> |
| Mtc_2055 | <a href="#">AFD00794</a> | putative PAS sensor signal transduction hi... | <a href="#">CDD</a> | <a href="#">UniProt</a> | <a href="#">Pfam</a> | <a href="#">InterPro</a> |
| Mtc_2109 | <a href="#">AFD00847</a> | putative PAS sensor signal transduction hi... | <a href="#">CDD</a> | <a href="#">UniProt</a> | <a href="#">Pfam</a> | <a href="#">InterPro</a> |
| Mtc_2288 | <a href="#">AFD01023</a> | Putative signal transduction histidine kin... | <a href="#">CDD</a> | <a href="#">UniProt</a> | <a href="#">Pfam</a> | <a href="#">InterPro</a> |
| Mtc_2385 | <a href="#">AFD01116</a> | putative PAS sensor signal transduction hi... | <a href="#">CDD</a> | <a href="#">UniProt</a> | <a href="#">Pfam</a> | <a href="#">InterPro</a> |
| Mtc_2386 | <a href="#">AFD01117</a> | putative PAS sensor signal transduction hi... | <a href="#">CDD</a> | <a href="#">UniProt</a> | <a href="#">Pfam</a> | <a href="#">InterPro</a> |

#### **REC only**

|                  |                          |                    |                            |     |                         |                      |                          |              |
|------------------|--------------------------|--------------------|----------------------------|-----|-------------------------|----------------------|--------------------------|--------------|
| Mtc_0021         | <a href="#">AFC98796</a> | Response regulator | [Methanocella conradii ... | CDD | <a href="#">UniProt</a> | <a href="#">Pfam</a> | <a href="#">InterPro</a> |              |
| Mtc_0391         | <a href="#">AFC99161</a> | Response regulator | [Methanocella conradii ... | CDD | <a href="#">UniProt</a> | <a href="#">Pfam</a> | <a href="#">InterPro</a> |              |
| Mtc_0429         | <a href="#">AFC99196</a> | Response regulator | [Methanocella conradii ... | CDD | <a href="#">UniProt</a> | <a href="#">Pfam</a> | <a href="#">InterPro</a> |              |
| Mtc_0831         | <a href="#">AFC99592</a> | Response regulator | [Methanocella conradii ... | CDD | <a href="#">UniProt</a> | <a href="#">Pfam</a> | <a href="#">InterPro</a> |              |
| Mtc_1156         | <a href="#">AFC99912</a> | Response regulator | [Methanocella conradii ... | CDD | <a href="#">UniProt</a> | <a href="#">Pfam</a> | <a href="#">InterPro</a> |              |
| Mtc_1960         | <a href="#">AFD00700</a> | Response regulator | [Methanocella conradii ... | CDD | <a href="#">UniProt</a> | <a href="#">Pfam</a> | <a href="#">InterPro</a> |              |
| Mtc_2141         | <a href="#">AFD00879</a> | Response regulator | [Methanocella conradii ... | CDD | <a href="#">UniProt</a> | <a href="#">Pfam</a> | <a href="#">InterPro</a> |              |
| Mtc_2363         | <a href="#">AFD01096</a> | Response regulator | [Methanocella conradii ... | CDD | <a href="#">UniProt</a> | <a href="#">Pfam</a> | <a href="#">InterPro</a> |              |
| <b>Other RRs</b> |                          |                    |                            |     |                         |                      |                          |              |
| Mtc_0800         | <a href="#">AFC99561</a> | Response regulator | [Methanocella conradii ... | CDD | <a href="#">UniProt</a> | <a href="#">Pfam</a> | <a href="#">InterPro</a> | (REC-MetOD2) |

**Methanocella paludicola SANAE**

**HisK, no REC**

|          |                          |                           |                     |     |                         |                      |                          |  |
|----------|--------------------------|---------------------------|---------------------|-----|-------------------------|----------------------|--------------------------|--|
| MCP_0034 | <a href="#">BAI60106</a> | putative histidine kinase | [Methanocella pa... | CDD | <a href="#">UniProt</a> | <a href="#">Pfam</a> | <a href="#">InterPro</a> |  |
| MCP_0052 | <a href="#">BAI60124</a> | putative histidine kinase | [Methanocella pa... | CDD | <a href="#">UniProt</a> | <a href="#">Pfam</a> | <a href="#">InterPro</a> |  |
| MCP_0054 | <a href="#">BAI60126</a> | putative histidine kinase | [Methanocella pa... | CDD | <a href="#">UniProt</a> | <a href="#">Pfam</a> | <a href="#">InterPro</a> |  |
| MCP_0354 | <a href="#">BAI60426</a> | putative histidine kinase | [Methanocella pa... | CDD | <a href="#">UniProt</a> | <a href="#">Pfam</a> | <a href="#">InterPro</a> |  |
| MCP_0357 | <a href="#">BAI60429</a> | putative histidine kinase | [Methanocella pa... | CDD | <a href="#">UniProt</a> | <a href="#">Pfam</a> | <a href="#">InterPro</a> |  |
| MCP_0535 | <a href="#">BAI60607</a> | putative histidine kinase | [Methanocella pa... | CDD | <a href="#">UniProt</a> | <a href="#">Pfam</a> | <a href="#">InterPro</a> |  |
| MCP_0536 | <a href="#">BAI60608</a> | putative histidine kinase | [Methanocella pa... | CDD | <a href="#">UniProt</a> | <a href="#">Pfam</a> | <a href="#">InterPro</a> |  |
| MCP_0578 | <a href="#">BAI60650</a> | putative histidine kinase | [Methanocella pa... | CDD | <a href="#">UniProt</a> | <a href="#">Pfam</a> | <a href="#">InterPro</a> |  |
| MCP_0602 | <a href="#">BAI60674</a> | putative histidine kinase | [Methanocella pa... | CDD | <a href="#">UniProt</a> | <a href="#">Pfam</a> | <a href="#">InterPro</a> |  |
| MCP_0751 | <a href="#">BAI60823</a> | putative histidine kinase | [Methanocella pa... | CDD | <a href="#">UniProt</a> | <a href="#">Pfam</a> | <a href="#">InterPro</a> |  |
| MCP_0753 | <a href="#">BAI60825</a> | putative histidine kinase | [Methanocella pa... | CDD | <a href="#">UniProt</a> | <a href="#">Pfam</a> | <a href="#">InterPro</a> |  |
| MCP_0834 | <a href="#">BAI60906</a> | putative histidine kinase | [Methanocella pa... | CDD | <a href="#">UniProt</a> | <a href="#">Pfam</a> | <a href="#">InterPro</a> |  |
| MCP_1032 | <a href="#">BAI61104</a> | putative histidine kinase | [Methanocella pa... | CDD | <a href="#">UniProt</a> | <a href="#">Pfam</a> | <a href="#">InterPro</a> |  |
| MCP_1179 | <a href="#">BAI61251</a> | putative histidine kinase | [Methanocella pa... | CDD | <a href="#">UniProt</a> | <a href="#">Pfam</a> | <a href="#">InterPro</a> |  |
| MCP_1198 | <a href="#">BAI61270</a> | putative histidine kinase | [Methanocella pa... | CDD | <a href="#">UniProt</a> | <a href="#">Pfam</a> | <a href="#">InterPro</a> |  |
| MCP_1286 | <a href="#">BAI61358</a> | putative histidine kinase | [Methanocella pa... | CDD | <a href="#">UniProt</a> | <a href="#">Pfam</a> | <a href="#">InterPro</a> |  |
| MCP_1287 | <a href="#">BAI61359</a> | putative histidine kinase | [Methanocella pa... | CDD | <a href="#">UniProt</a> | <a href="#">Pfam</a> | <a href="#">InterPro</a> |  |
| MCP_1288 | <a href="#">BAI61360</a> | putative histidine kinase | [Methanocella pa... | CDD | <a href="#">UniProt</a> | <a href="#">Pfam</a> | <a href="#">InterPro</a> |  |
| MCP_1307 | <a href="#">BAI61379</a> | putative histidine kinase | [Methanocella pa... | CDD | <a href="#">UniProt</a> | <a href="#">Pfam</a> | <a href="#">InterPro</a> |  |
| MCP_1342 | <a href="#">BAI61414</a> | putative histidine kinase | [Methanocella pa... | CDD | <a href="#">UniProt</a> | <a href="#">Pfam</a> | <a href="#">InterPro</a> |  |
| MCP_1350 | <a href="#">BAI61422</a> | putative histidine kinase | [Methanocella pa... | CDD | <a href="#">UniProt</a> | <a href="#">Pfam</a> | <a href="#">InterPro</a> |  |
| MCP_1351 | <a href="#">BAI61423</a> | putative histidine kinase | [Methanocella pa... | CDD | <a href="#">UniProt</a> | <a href="#">Pfam</a> | <a href="#">InterPro</a> |  |
| MCP_1387 | <a href="#">BAI61459</a> | putative histidine kinase | [Methanocella pa... | CDD | <a href="#">UniProt</a> | <a href="#">Pfam</a> | <a href="#">InterPro</a> |  |
| MCP_1388 | <a href="#">BAI61460</a> | putative histidine kinase | [Methanocella pa... | CDD | <a href="#">UniProt</a> | <a href="#">Pfam</a> | <a href="#">InterPro</a> |  |
| MCP_1413 | <a href="#">BAI61485</a> | putative histidine kinase | [Methanocella pa... | CDD | <a href="#">UniProt</a> | <a href="#">Pfam</a> | <a href="#">InterPro</a> |  |
| MCP_1426 | <a href="#">BAI61498</a> | putative histidine kinase | [Methanocella pa... | CDD | <a href="#">UniProt</a> | <a href="#">Pfam</a> | <a href="#">InterPro</a> |  |
| MCP_1443 | <a href="#">BAI61515</a> | putative histidine kinase | [Methanocella pa... | CDD | <a href="#">UniProt</a> | <a href="#">Pfam</a> | <a href="#">InterPro</a> |  |
| MCP_1543 | <a href="#">BAI61615</a> | putative histidine kinase | [Methanocella pa... | CDD | <a href="#">UniProt</a> | <a href="#">Pfam</a> | <a href="#">InterPro</a> |  |
| MCP_1544 | <a href="#">BAI61616</a> | putative histidine kinase | [Methanocella pa... | CDD | <a href="#">UniProt</a> | <a href="#">Pfam</a> | <a href="#">InterPro</a> |  |
| MCP_1546 | <a href="#">BAI61618</a> | putative histidine kinase | [Methanocella pa... | CDD | <a href="#">UniProt</a> | <a href="#">Pfam</a> | <a href="#">InterPro</a> |  |
| MCP_1547 | <a href="#">BAI61619</a> | putative histidine kinase | [Methanocella pa... | CDD | <a href="#">UniProt</a> | <a href="#">Pfam</a> | <a href="#">InterPro</a> |  |
| MCP_1614 | <a href="#">BAI61686</a> | putative histidine kinase | [Methanocella pa... | CDD | <a href="#">UniProt</a> | <a href="#">Pfam</a> | <a href="#">InterPro</a> |  |
| MCP_1615 | <a href="#">BAI61687</a> | putative histidine kinase | [Methanocella pa... | CDD | <a href="#">UniProt</a> | <a href="#">Pfam</a> | <a href="#">InterPro</a> |  |
| MCP_1624 | <a href="#">BAI61696</a> | putative histidine kinase | [Methanocella pa... | CDD | <a href="#">UniProt</a> | <a href="#">Pfam</a> | <a href="#">InterPro</a> |  |
| MCP_1665 | <a href="#">BAI61737</a> | putative histidine kinase | [Methanocella pa... | CDD | <a href="#">UniProt</a> | <a href="#">Pfam</a> | <a href="#">InterPro</a> |  |
| MCP_1757 | <a href="#">BAI61829</a> | putative histidine kinase | [Methanocella pa... | CDD | <a href="#">UniProt</a> | <a href="#">Pfam</a> | <a href="#">InterPro</a> |  |
| MCP_1783 | <a href="#">BAI61855</a> | putative histidine kinase | [Methanocella pa... | CDD | <a href="#">UniProt</a> | <a href="#">Pfam</a> | <a href="#">InterPro</a> |  |
| MCP_1809 | <a href="#">BAI61881</a> | putative histidine kinase | [Methanocella pa... | CDD | <a href="#">UniProt</a> | <a href="#">Pfam</a> | <a href="#">InterPro</a> |  |
| MCP_1856 | <a href="#">BAI61928</a> | putative histidine kinase | [Methanocella pa... | CDD | <a href="#">UniProt</a> | <a href="#">Pfam</a> | <a href="#">InterPro</a> |  |
| MCP_1858 | <a href="#">BAI61930</a> | putative histidine kinase | [Methanocella pa... | CDD | <a href="#">UniProt</a> | <a href="#">Pfam</a> | <a href="#">InterPro</a> |  |
| MCP_1908 | <a href="#">BAI61980</a> | putative histidine kinase | [Methanocella pa... | CDD | <a href="#">UniProt</a> | <a href="#">Pfam</a> | <a href="#">InterPro</a> |  |
| MCP_2068 | <a href="#">BAI62140</a> | putative histidine kinase | [Methanocella pa... | CDD | <a href="#">UniProt</a> | <a href="#">Pfam</a> | <a href="#">InterPro</a> |  |
| MCP_2192 | <a href="#">BAI62264</a> | putative histidine kinase | [Methanocella pa... | CDD | <a href="#">UniProt</a> | <a href="#">Pfam</a> | <a href="#">InterPro</a> |  |
| MCP_2193 | <a href="#">BAI62265</a> | putative histidine kinase | [Methanocella pa... | CDD | <a href="#">UniProt</a> | <a href="#">Pfam</a> | <a href="#">InterPro</a> |  |
| MCP_2197 | <a href="#">BAI62269</a> | putative histidine kinase | [Methanocella pa... | CDD | <a href="#">UniProt</a> | <a href="#">Pfam</a> | <a href="#">InterPro</a> |  |
| MCP_2198 | <a href="#">BAI62270</a> | putative histidine kinase | [Methanocella pa... | CDD | <a href="#">UniProt</a> | <a href="#">Pfam</a> | <a href="#">InterPro</a> |  |
| MCP_2199 | <a href="#">BAI62271</a> | putative histidine kinase | [Methanocella pa... | CDD | <a href="#">UniProt</a> | <a href="#">Pfam</a> | <a href="#">InterPro</a> |  |
| MCP_2202 | <a href="#">BAI62274</a> | putative histidine kinase | [Methanocella pa... | CDD | <a href="#">UniProt</a> | <a href="#">Pfam</a> | <a href="#">InterPro</a> |  |
| MCP_2254 | <a href="#">BAI62326</a> | putative histidine kinase | [Methanocella pa... | CDD | <a href="#">UniProt</a> | <a href="#">Pfam</a> | <a href="#">InterPro</a> |  |
| MCP_2616 | <a href="#">BAI62688</a> | putative histidine kinase | [Methanocella pa... | CDD | <a href="#">UniProt</a> | <a href="#">Pfam</a> | <a href="#">InterPro</a> |  |
| MCP_2784 | <a href="#">BAI62856</a> | putative histidine kinase | [Methanocella pa... | CDD | <a href="#">UniProt</a> | <a href="#">Pfam</a> | <a href="#">InterPro</a> |  |

**REC only**

|           |                          |                             |                   |     |                         |                      |                          |  |
|-----------|--------------------------|-----------------------------|-------------------|-----|-------------------------|----------------------|--------------------------|--|
| MCP_1156  | <a href="#">BAI61228</a> | putative response regulator | [Methanocella ... | CDD | <a href="#">UniProt</a> | <a href="#">Pfam</a> | <a href="#">InterPro</a> |  |
| MCP_1545  | <a href="#">BAI61617</a> | putative response regulator | [Methanocella ... | CDD | <a href="#">UniProt</a> | <a href="#">Pfam</a> | <a href="#">InterPro</a> |  |
| MCP_1650  | <a href="#">BAI61722</a> | putative response regulator | [Methanocella ... | CDD | <a href="#">UniProt</a> | <a href="#">Pfam</a> | <a href="#">InterPro</a> |  |
| MCP_1750  | <a href="#">BAI61822</a> | putative response regulator | [Methanocella ... | CDD | <a href="#">UniProt</a> | <a href="#">Pfam</a> | <a href="#">InterPro</a> |  |
| MCP_2023  | <a href="#">BAI62095</a> | putative response regulator | [Methanocella ... | CDD | <a href="#">UniProt</a> | <a href="#">Pfam</a> | <a href="#">InterPro</a> |  |
| MCP_2581  | <a href="#">BAI62653</a> | putative response regulator | [Methanocella ... | CDD | <a href="#">UniProt</a> | <a href="#">Pfam</a> | <a href="#">InterPro</a> |  |
| *MCP_2605 | <a href="#">BAI62677</a> | putative response regulator | [Methanocella ... | CDD | <a href="#">UniProt</a> | <a href="#">Pfam</a> | <a href="#">InterPro</a> |  |

**REC-HisK**

|                  |                          |                                      |                   |     |                         |                      |                          |              |
|------------------|--------------------------|--------------------------------------|-------------------|-----|-------------------------|----------------------|--------------------------|--------------|
| MCP_2132         | <a href="#">BAI62204</a> | putative hybrid sensor and regulator | [Meth...          | CDD | <a href="#">UniProt</a> | <a href="#">Pfam</a> | <a href="#">InterPro</a> |              |
| <b>Other RRs</b> |                          |                                      |                   |     |                         |                      |                          |              |
| MCP_0475         | <a href="#">BAI60547</a> | putative response regulator          | [Methanocella ... | CDD | <a href="#">UniProt</a> | <a href="#">Pfam</a> | <a href="#">InterPro</a> | (REC-MetOD2) |

### Methanococcoides burtonii DSM 6242

#### HisK, no REC

|           |                          |                                               |     |                         |                      |                          |
|-----------|--------------------------|-----------------------------------------------|-----|-------------------------|----------------------|--------------------------|
| Mbur_0083 | <a href="#">ABE51103</a> | HATPase domain-containing multisensor sign... | CDD | <a href="#">UniProt</a> | <a href="#">Pfam</a> | <a href="#">InterPro</a> |
| Mbur_0262 | <a href="#">ABE51269</a> | PAS sensor signal transduction histidine k... | CDD | <a href="#">UniProt</a> | <a href="#">Pfam</a> | <a href="#">InterPro</a> |
| Mbur_0312 | <a href="#">ABE51314</a> | Signal transduction histidine kinase [Meth... | CDD | <a href="#">UniProt</a> | <a href="#">Pfam</a> | <a href="#">InterPro</a> |
| Mbur_0361 | <a href="#">ABE51356</a> | Chemotaxis protein CheA [Methanococcoides ... | CDD | <a href="#">UniProt</a> | <a href="#">Pfam</a> | <a href="#">InterPro</a> |
| Mbur_0380 | <a href="#">ABE51375</a> | Histidine kinase domain protein [Methanoco... | CDD | <a href="#">UniProt</a> | <a href="#">Pfam</a> | <a href="#">InterPro</a> |
| Mbur_0400 | <a href="#">ABE51392</a> | Signal transduction histidine kinase [Meth... | CDD | <a href="#">UniProt</a> | <a href="#">Pfam</a> | <a href="#">InterPro</a> |
| Mbur_0510 | <a href="#">ABE51492</a> | HATPase domain-containing external sensor ... | CDD | <a href="#">UniProt</a> | <a href="#">Pfam</a> | <a href="#">InterPro</a> |
| Mbur_0639 | <a href="#">ABE51610</a> | pleC (non-motile and phage-resistance prot... | CDD | <a href="#">UniProt</a> | <a href="#">Pfam</a> | <a href="#">InterPro</a> |
| Mbur_0694 | <a href="#">ABE51659</a> | Signal transduction histidine kinase [Meth... | CDD | <a href="#">UniProt</a> | <a href="#">Pfam</a> | <a href="#">InterPro</a> |
| Mbur_0768 | <a href="#">ABE51727</a> | pleC-like signal transduction histidine ki... | CDD | <a href="#">UniProt</a> | <a href="#">Pfam</a> | <a href="#">InterPro</a> |
| Mbur_0820 | <a href="#">ABE51775</a> | pleC (Non-motile and phage-resistance prot... | CDD | <a href="#">UniProt</a> | <a href="#">Pfam</a> | <a href="#">InterPro</a> |
| Mbur_0842 | <a href="#">ABE51795</a> | Multisensor signal transduction histidine ... | CDD | <a href="#">UniProt</a> | <a href="#">Pfam</a> | <a href="#">InterPro</a> |
| Mbur_0913 | <a href="#">ABE51858</a> | GAF-containing Multisensor signal transduc... | CDD | <a href="#">UniProt</a> | <a href="#">Pfam</a> | <a href="#">InterPro</a> |
| Mbur_0950 | <a href="#">ABE51892</a> | fixL-like, HATPase domain-containing PAS s... | CDD | <a href="#">UniProt</a> | <a href="#">Pfam</a> | <a href="#">InterPro</a> |
| Mbur_0955 | <a href="#">ABE51897</a> | Multisensor signal transduction histidine ... | CDD | <a href="#">UniProt</a> | <a href="#">Pfam</a> | <a href="#">InterPro</a> |
| Mbur_0958 | <a href="#">ABE51900</a> | ATP-binding region, ATPase-like protein [M... | CDD | <a href="#">UniProt</a> | <a href="#">Pfam</a> | <a href="#">InterPro</a> |
| Mbur_1023 | <a href="#">ABE51958</a> | signal transduction histidine kinase, with... | CDD | <a href="#">UniProt</a> | <a href="#">Pfam</a> | <a href="#">InterPro</a> |
| Mbur_1024 | <a href="#">ABE51959</a> | HATPase domain-containing multisensor sign... | CDD | <a href="#">UniProt</a> | <a href="#">Pfam</a> | <a href="#">InterPro</a> |
| Mbur_1166 | <a href="#">ABE52089</a> | pleC-like multisensor signal transduction ... | CDD | <a href="#">UniProt</a> | <a href="#">Pfam</a> | <a href="#">InterPro</a> |
| Mbur_1247 | <a href="#">ABE52169</a> | Multisensor signal transduction histidine ... | CDD | <a href="#">UniProt</a> | <a href="#">Pfam</a> | <a href="#">InterPro</a> |
| Mbur_1264 | <a href="#">ABE52185</a> | Sensor protein yyG-like multisensor signal... | CDD | <a href="#">UniProt</a> | <a href="#">Pfam</a> | <a href="#">InterPro</a> |
| Mbur_2119 | <a href="#">ABE52992</a> | HATPase domain-containing multisensor sign... | CDD | <a href="#">UniProt</a> | <a href="#">Pfam</a> | <a href="#">InterPro</a> |
| Mbur_2120 | <a href="#">ABE52993</a> | bvgS precursor-like multisensor signal tra... | CDD | <a href="#">UniProt</a> | <a href="#">Pfam</a> | <a href="#">InterPro</a> |
| Mbur_2201 | <a href="#">ABE53066</a> | Multisensor signal transduction histidine ... | CDD | <a href="#">UniProt</a> | <a href="#">Pfam</a> | <a href="#">InterPro</a> |
| Mbur_2286 | <a href="#">ABE53146</a> | Multisensor signal transduction histidine ... | CDD | <a href="#">UniProt</a> | <a href="#">Pfam</a> | <a href="#">InterPro</a> |
| Mbur_2403 | <a href="#">ABE53254</a> | luxQ-like PAS sensor signal transduction h... | CDD | <a href="#">UniProt</a> | <a href="#">Pfam</a> | <a href="#">InterPro</a> |

#### REC only

|           |                          |                                               |     |                         |                      |                          |
|-----------|--------------------------|-----------------------------------------------|-----|-------------------------|----------------------|--------------------------|
| Mbur_0359 | <a href="#">ABE51354</a> | CheY like protein [Methanococcoides burton... | CDD | <a href="#">UniProt</a> | <a href="#">Pfam</a> | <a href="#">InterPro</a> |
| Mbur_0834 | <a href="#">ABE51788</a> | response regulator receiver domain [Methan... | CDD | <a href="#">UniProt</a> | <a href="#">Pfam</a> | <a href="#">InterPro</a> |
| Mbur_0841 | <a href="#">ABE51794</a> | response regulator receiver domain [Methan... | CDD | <a href="#">UniProt</a> | <a href="#">Pfam</a> | <a href="#">InterPro</a> |
| Mbur_1557 | <a href="#">ABE52463</a> | response regulator receiver domain [Methan... | CDD | <a href="#">UniProt</a> | <a href="#">Pfam</a> | <a href="#">InterPro</a> |
| Mbur_2107 | <a href="#">ABE52981</a> | response regulator receiver domain [Methan... | CDD | <a href="#">UniProt</a> | <a href="#">Pfam</a> | <a href="#">InterPro</a> |
| Mbur_2285 | <a href="#">ABE53145</a> | response regulator receiver domain [Methan... | CDD | <a href="#">UniProt</a> | <a href="#">Pfam</a> | <a href="#">InterPro</a> |
| Mbur_2294 | <a href="#">ABE53151</a> | response regulator receiver domain [Methan... | CDD | <a href="#">UniProt</a> | <a href="#">Pfam</a> | <a href="#">InterPro</a> |
| Mbur_2445 | <a href="#">ABE53296</a> | response regulator receiver domain [Methan... | CDD | <a href="#">UniProt</a> | <a href="#">Pfam</a> | <a href="#">InterPro</a> |

#### REC-HisK

|           |                          |                                               |     |                         |                      |                          |
|-----------|--------------------------|-----------------------------------------------|-----|-------------------------|----------------------|--------------------------|
| Mbur_1775 | <a href="#">ABE52664</a> | multisensor signal transduction histidine ... | CDD | <a href="#">UniProt</a> | <a href="#">Pfam</a> | <a href="#">InterPro</a> |
| Mbur_1899 | <a href="#">ABE52781</a> | multisensor signal transduction histidine ... | CDD | <a href="#">UniProt</a> | <a href="#">Pfam</a> | <a href="#">InterPro</a> |
| Mbur_2108 | <a href="#">ABE52982</a> | multisensor signal transduction histidine ... | CDD | <a href="#">UniProt</a> | <a href="#">Pfam</a> | <a href="#">InterPro</a> |
| Mbur_2414 | <a href="#">ABE53265</a> | multisensor signal transduction histidine ... | CDD | <a href="#">UniProt</a> | <a href="#">Pfam</a> | <a href="#">InterPro</a> |

#### REC-CheB

|           |                          |                                                  |     |                         |                      |                          |
|-----------|--------------------------|--------------------------------------------------|-----|-------------------------|----------------------|--------------------------|
| Mbur_0360 | <a href="#">ABE51355</a> | Protein-glutamate methyltransferase CheB [Met... | CDD | <a href="#">UniProt</a> | <a href="#">Pfam</a> | <a href="#">InterPro</a> |
|-----------|--------------------------|--------------------------------------------------|-----|-------------------------|----------------------|--------------------------|

#### REC-PAS

|           |                          |                                               |     |                         |                      |                          |
|-----------|--------------------------|-----------------------------------------------|-----|-------------------------|----------------------|--------------------------|
| Mbur_0825 | <a href="#">ABE51779</a> | response regulator receiver domain-contain... | CDD | <a href="#">UniProt</a> | <a href="#">Pfam</a> | <a href="#">InterPro</a> |
| Mbur_0883 | <a href="#">ABE51832</a> | response regulator receiver domain-contain... | CDD | <a href="#">UniProt</a> | <a href="#">Pfam</a> | <a href="#">InterPro</a> |

#### HTH-REC

|           |                          |                                                      |     |                         |                      |                                       |
|-----------|--------------------------|------------------------------------------------------|-----|-------------------------|----------------------|---------------------------------------|
| Mbur_0695 | <a href="#">ABE51660</a> | <b>LtrR, low temperature responsive response</b> ... | CDD | <a href="#">UniProt</a> | <a href="#">Pfam</a> | <a href="#">InterPro</a> (HTH_11-REC) |
|-----------|--------------------------|------------------------------------------------------|-----|-------------------------|----------------------|---------------------------------------|

#### REC-MetOD1

|           |                          |                                               |     |                         |                      |                                       |
|-----------|--------------------------|-----------------------------------------------|-----|-------------------------|----------------------|---------------------------------------|
| Mbur_0878 | <a href="#">ABE51827</a> | response regulator receiver domain-contain... | CDD | <a href="#">UniProt</a> | <a href="#">Pfam</a> | <a href="#">InterPro</a> (REC-MetOD1) |
|-----------|--------------------------|-----------------------------------------------|-----|-------------------------|----------------------|---------------------------------------|

#### Other RRs

|           |                          |                                               |     |                         |                      |                                     |
|-----------|--------------------------|-----------------------------------------------|-----|-------------------------|----------------------|-------------------------------------|
| Mbur_2185 | <a href="#">ABE53050</a> | response regulator receiver domain-contain... | CDD | <a href="#">UniProt</a> | <a href="#">Pfam</a> | <a href="#">InterPro</a> (KaiC-REC) |
|-----------|--------------------------|-----------------------------------------------|-----|-------------------------|----------------------|-------------------------------------|

### Methanococcoides methylutens MM1

#### HisK, no REC

|            |                          |                                               |     |                         |                      |                          |
|------------|--------------------------|-----------------------------------------------|-----|-------------------------|----------------------|--------------------------|
| MCMEM_0377 | <a href="#">AKB84430</a> | Sensory transduction histidine kinase [Met... | CDD | <a href="#">UniProt</a> | <a href="#">Pfam</a> | <a href="#">InterPro</a> |
| MCMEM_0435 | <a href="#">AKB84488</a> | Sensory transduction histidine kinase [Met... | CDD | <a href="#">UniProt</a> | <a href="#">Pfam</a> | <a href="#">InterPro</a> |
| MCMEM_0824 | <a href="#">AKB84877</a> | Sensory transduction histidine kinase [Met... | CDD | <a href="#">UniProt</a> | <a href="#">Pfam</a> | <a href="#">InterPro</a> |
| MCMEM_0922 | <a href="#">AKB84975</a> | Sensory transduction histidine kinase [Met... | CDD | <a href="#">UniProt</a> | <a href="#">Pfam</a> | <a href="#">InterPro</a> |
| MCMEM_0972 | <a href="#">AKB85025</a> | hypothetical protein MCMEM_0972 [Methanoco... | CDD | <a href="#">UniProt</a> | <a href="#">Pfam</a> | <a href="#">InterPro</a> |
| MCMEM_1047 | <a href="#">AKB85100</a> | Adenylate cyclase [Methanococcoides methyl... | CDD | <a href="#">UniProt</a> | <a href="#">Pfam</a> | <a href="#">InterPro</a> |
| MCMEM_1159 | <a href="#">AKB85212</a> | hypothetical protein MCMEM_1159 [Methanoco... | CDD | <a href="#">UniProt</a> | <a href="#">Pfam</a> | <a href="#">InterPro</a> |
| MCMEM_1168 | <a href="#">AKB85221</a> | hypothetical protein MCMEM_1168 [Methanoco... | CDD | <a href="#">UniProt</a> | <a href="#">Pfam</a> | <a href="#">InterPro</a> |
| MCMEM_1188 | <a href="#">AKB85241</a> | Sensory transduction histidine kinase [Met... | CDD | <a href="#">UniProt</a> | <a href="#">Pfam</a> | <a href="#">InterPro</a> |
| MCMEM_1247 | <a href="#">AKB85300</a> | sensory transduction histidine kinase [Met... | CDD | <a href="#">UniProt</a> | <a href="#">Pfam</a> | <a href="#">InterPro</a> |
| MCMEM_1299 | <a href="#">AKB85352</a> | Sensory transduction histidine kinase [Met... | CDD | <a href="#">UniProt</a> | <a href="#">Pfam</a> | <a href="#">InterPro</a> |
| MCMEM_1317 | <a href="#">AKB85370</a> | hypothetical protein MCMEM_1317 [Methanoco... | CDD | <a href="#">UniProt</a> | <a href="#">Pfam</a> | <a href="#">InterPro</a> |
| MCMEM_1411 | <a href="#">AKB85464</a> | hypothetical protein MCMEM_1411 [Methanoco... | CDD | <a href="#">UniProt</a> | <a href="#">Pfam</a> | <a href="#">InterPro</a> |
| MCMEM_1415 | <a href="#">AKB85468</a> | hypothetical protein MCMEM_1415 [Methanoco... | CDD | <a href="#">UniProt</a> | <a href="#">Pfam</a> | <a href="#">InterPro</a> |
| MCMEM_1453 | <a href="#">AKB85506</a> | sensory transduction histidine kinase [Met... | CDD | <a href="#">UniProt</a> | <a href="#">Pfam</a> | <a href="#">InterPro</a> |
| MCMEM_1462 | <a href="#">AKB85515</a> | sensory transduction histidine kinase [Met... | CDD | <a href="#">UniProt</a> | <a href="#">Pfam</a> | <a href="#">InterPro</a> |
| MCMEM_1504 | <a href="#">AKB85557</a> | Sensory transduction histidine kinase [Met... | CDD | <a href="#">UniProt</a> | <a href="#">Pfam</a> | <a href="#">InterPro</a> |
| MCMEM_1505 | <a href="#">AKB85558</a> | hypothetical protein MCMEM_1505 [Methanoco... | CDD | <a href="#">UniProt</a> | <a href="#">Pfam</a> | <a href="#">InterPro</a> |
| MCMEM_1624 | <a href="#">AKB85677</a> | sensory transduction histidine kinase [Met... | CDD | <a href="#">UniProt</a> | <a href="#">Pfam</a> | <a href="#">InterPro</a> |
| MCMEM_1635 | <a href="#">AKB85688</a> | hypothetical protein MCMEM_1635 [Methanoco... | CDD | <a href="#">UniProt</a> | <a href="#">Pfam</a> | <a href="#">InterPro</a> |
| MCMEM_1950 | <a href="#">AKB86003</a> | hypothetical protein MCMEM_1950 [Methanoco... | CDD | <a href="#">UniProt</a> | <a href="#">Pfam</a> | <a href="#">InterPro</a> |
| MCMEM_1951 | <a href="#">AKB86004</a> | hypothetical protein MCMEM_1951 [Methanoco... | CDD | <a href="#">UniProt</a> | <a href="#">Pfam</a> | <a href="#">InterPro</a> |

|                    |                          |                                               |     |                         |                      |                                     |
|--------------------|--------------------------|-----------------------------------------------|-----|-------------------------|----------------------|-------------------------------------|
| MCMEM_2043         | <a href="#">AKB86096</a> | Sensory transduction histidine kinase [Met... | CDD | <a href="#">UniProt</a> | <a href="#">Pfam</a> | <a href="#">InterPro</a>            |
| MCMEM_2044         | <a href="#">AKB86097</a> | Sensory transduction histidine kinase [Met... | CDD | <a href="#">UniProt</a> | <a href="#">Pfam</a> | <a href="#">InterPro</a>            |
| MCMEM_2046         | <a href="#">AKB86099</a> | hypothetical protein MCMEM_2046 [Methanoco... | CDD | <a href="#">UniProt</a> | <a href="#">Pfam</a> | <a href="#">InterPro</a>            |
| MCMEM_2069         | <a href="#">AKB86122</a> | hypothetical protein MCMEM_2069 [Methanoco... | CDD | <a href="#">UniProt</a> | <a href="#">Pfam</a> | <a href="#">InterPro</a>            |
| <b>Hybrid HisK</b> |                          |                                               |     |                         |                      |                                     |
| MCMEM_1707         | <a href="#">AKB85760</a> | hypothetical protein MCMEM_1707 [Methanoco... | CDD | <a href="#">UniProt</a> | <a href="#">Pfam</a> | <a href="#">InterPro</a>            |
| <b>REC only</b>    |                          |                                               |     |                         |                      |                                     |
| MCMEM_0434         | <a href="#">AKB84487</a> | response regulator receiver [Methanococci...  | CDD | <a href="#">UniProt</a> | <a href="#">Pfam</a> | <a href="#">InterPro</a>            |
| MCMEM_0441         | <a href="#">AKB84494</a> | sensory transduction regulatory protein [M... | CDD | <a href="#">UniProt</a> | <a href="#">Pfam</a> | <a href="#">InterPro</a>            |
| MCMEM_0964         | <a href="#">AKB85017</a> | Response regulator receiver [Methanococci...  | CDD | <a href="#">UniProt</a> | <a href="#">Pfam</a> | <a href="#">InterPro</a>            |
| MCMEM_0971         | <a href="#">AKB85024</a> | response regulator receiver [Methanococci...  | CDD | <a href="#">UniProt</a> | <a href="#">Pfam</a> | <a href="#">InterPro</a>            |
| MCMEM_0304         | <a href="#">AKB84357</a> | Two-component response regulator [Methanoc... | CDD | <a href="#">UniProt</a> | <a href="#">Pfam</a> | <a href="#">InterPro</a>            |
| MCMEM_2068         | <a href="#">AKB86121</a> | response regulator receiver [Methanococci...  | CDD | <a href="#">UniProt</a> | <a href="#">Pfam</a> | <a href="#">InterPro</a>            |
| MCMEM_0583         | <a href="#">AKB84636</a> | DNA-binding response regulator KdpE [Metha... | CDD | <a href="#">UniProt</a> | <a href="#">Pfam</a> | <a href="#">InterPro</a>            |
| <b>REC-HisK</b>    |                          |                                               |     |                         |                      |                                     |
| MCMEM_0032         | <a href="#">AKB84085</a> | Sensory transduction histidine kinase [Met... | CDD | <a href="#">UniProt</a> | <a href="#">Pfam</a> | <a href="#">InterPro</a>            |
| MCMEM_0128         | <a href="#">AKB84181</a> | Pole remodelling regulatory diguanylate cy... | CDD | <a href="#">UniProt</a> | <a href="#">Pfam</a> | <a href="#">InterPro</a>            |
| MCMEM_0305         | <a href="#">AKB84358</a> | hypothetical protein MCMEM_0305 [Methanoco... | CDD | <a href="#">UniProt</a> | <a href="#">Pfam</a> | <a href="#">InterPro</a>            |
| MCMEM_0556         | <a href="#">AKB84609</a> | Sensory transduction histidine kinase [Met... | CDD | <a href="#">UniProt</a> | <a href="#">Pfam</a> | <a href="#">InterPro</a>            |
| <b>REC-PAS</b>     |                          |                                               |     |                         |                      |                                     |
| MCMEM_1276         | <a href="#">AKB85329</a> | response regulator receiver [Methanococci...  | CDD | <a href="#">UniProt</a> | <a href="#">Pfam</a> | <a href="#">InterPro</a>            |
| <b>HTH-REC</b>     |                          |                                               |     |                         |                      |                                     |
| MCMEM_1410         | <a href="#">AKB85463</a> | Phosphate regulon transcriptional regulato... | CDD | <a href="#">UniProt</a> | <a href="#">Pfam</a> | <a href="#">InterPro</a>            |
| <b>Other RRs</b>   |                          |                                               |     |                         |                      |                                     |
| MCMEM_0362         | <a href="#">AKB84415</a> | Phosphate regulon transcriptional regulato... | CDD | <a href="#">UniProt</a> | <a href="#">Pfam</a> | <a href="#">InterPro</a> (KaiC-REC) |

### [Methanococcus aeolicus Nankai-3](#)

#### **HisK, no REC**

Maeo\_1437 [ABR57013](#) integral membrane sensor signal transducti... CDD [UniProt](#) [Pfam](#) [InterPro](#)

#### **REC only**

Maeo\_1436 [ABR57012](#) response regulator receiver protein [Metha... CDD [UniProt](#) [Pfam](#) [InterPro](#)

### [Methanococcus maripaludis S2](#)

#### **HisK, no REC**

MMP0927 [CAF30483](#) Chemotaxis protein CheA [Methanococcus mar... CDD [UniProt](#) [Pfam](#) [InterPro](#)

MMP1120 [CAF30676](#) ATP-binding protein, ATPase-like:Histidine... CDD [UniProt](#) [Pfam](#) [InterPro](#)

MMP1303 [CAF30859](#) Sensory transduction histidine kinase [Met... CDD [UniProt](#) [Pfam](#) [InterPro](#)

#### **REC only**

MMP1304 [CAF30860](#) Response regulator receiver [Methanococcus... CDD [UniProt](#) [Pfam](#) [InterPro](#)

MMP0933 [CAF30489](#) chemotaxis protein CheY [Methanococcus mar... CDD [UniProt](#) [Pfam](#) [InterPro](#)

#### **REC-CheB**

MMP0926 [CAF30482](#) chemotaxis protein CheB [Methanococcus mar... CDD [UniProt](#) [Pfam](#) [InterPro](#)

### [Methanococcus vannielii SB](#)

#### **HisK, no REC**

Mevan\_0140 [ABR54051](#) integral membrane sensor signal transducti... CDD [UniProt](#) [Pfam](#) [InterPro](#)

Mevan\_0142 [ABR54053](#) PAS/PAC sensor signal transduction histidi... CDD [UniProt](#) [Pfam](#) [InterPro](#)

Mevan\_0220 [ABR54130](#) CheA signal transduction histidine kinase ... CDD [UniProt](#) [Pfam](#) [InterPro](#)

Mevan\_0444 [ABR54351](#) integral membrane sensor signal transducti... CDD [UniProt](#) [Pfam](#) [InterPro](#)

Mevan\_0613 [ABR54519](#) integral membrane sensor signal transducti... CDD [UniProt](#) [Pfam](#) [InterPro](#)

#### **REC only**

Mevan\_0256 [ABR54165](#) response regulator receiver protein [Metha... CDD [UniProt](#) [Pfam](#) [InterPro](#)

Mevan\_0614 [ABR54520](#) response regulator receiver protein [Metha... CDD [UniProt](#) [Pfam](#) [InterPro](#)

#### **REC-CheB**

Mevan\_0219 [ABR54129](#) response regulator receiver modulated CheB... CDD [UniProt](#) [Pfam](#) [InterPro](#)

### [Methanococcus voltae A3](#)

#### **HisK, no REC**

Mvol\_0817 [ADI36476](#) integral membrane sensor signal transducti... CDD [UniProt](#) [Pfam](#) [InterPro](#)

Mvol\_0949 [ADI36606](#) CheA signal transduction histidine kinase ... CDD [UniProt](#) [Pfam](#) [InterPro](#)

#### **REC only**

Mvol\_0816 [ADI36475](#) response regulator receiver protein [Metha... CDD [UniProt](#) [Pfam](#) [InterPro](#)

Mvol\_0954 [ADI36611](#) response regulator receiver protein [Metha... CDD [UniProt](#) [Pfam](#) [InterPro](#)

#### **REC-CheB**

Mvol\_0948 [ADI36605](#) response regulator receiver modulated CheB... CDD [UniProt](#) [Pfam](#) [InterPro](#)

### [Methanocorpusculum labreanum Z](#)

#### **HisK, no REC**

Mlab\_1181 [ABN07350](#) histidine kinase [Methanocorpusculum labre... CDD [UniProt](#) [Pfam](#) [InterPro](#)

#### **Other RRs**

Mlab\_1182 [ABN07351](#) response regulator receiver protein [Metha... CDD [UniProt](#) [Pfam](#) [InterPro](#) (no hits in archaea)

## Methanoculleus bourgensis MS2

### **HisK, no REC**

|            |                          |                                               |                     |                         |                      |                          |
|------------|--------------------------|-----------------------------------------------|---------------------|-------------------------|----------------------|--------------------------|
| BN140_0081 | <a href="#">CCJ35004</a> | multi-sensor signal transduction histidine... | <a href="#">CDD</a> | <a href="#">UniProt</a> | <a href="#">Pfam</a> | <a href="#">InterPro</a> |
| BN140_0242 | <a href="#">CCJ35165</a> | sensor histidine kinase [Methanoculleus bo... | <a href="#">CDD</a> | <a href="#">UniProt</a> | <a href="#">Pfam</a> | <a href="#">InterPro</a> |
| BN140_0345 | <a href="#">CCJ35268</a> | multi-sensor signal transduction histidine... | <a href="#">CDD</a> | <a href="#">UniProt</a> | <a href="#">Pfam</a> | <a href="#">InterPro</a> |
| BN140_0614 | <a href="#">CCJ35537</a> | Signal transduction histidine kinase [Meth... | <a href="#">CDD</a> | <a href="#">UniProt</a> | <a href="#">Pfam</a> | <a href="#">InterPro</a> |
| BN140_0740 | <a href="#">CCJ35663</a> | multi-sensor signal transduction histidine... | <a href="#">CDD</a> | <a href="#">UniProt</a> | <a href="#">Pfam</a> | <a href="#">InterPro</a> |
| BN140_1222 | <a href="#">CCJ36145</a> | multi-sensor signal transduction histidine... | <a href="#">CDD</a> | <a href="#">UniProt</a> | <a href="#">Pfam</a> | <a href="#">InterPro</a> |
| BN140_1315 | <a href="#">CCJ36238</a> | multi-sensor signal transduction histidine... | <a href="#">CDD</a> | <a href="#">UniProt</a> | <a href="#">Pfam</a> | <a href="#">InterPro</a> |
| BN140_1385 | <a href="#">CCJ36308</a> | multi-sensor signal transduction histidine... | <a href="#">CDD</a> | <a href="#">UniProt</a> | <a href="#">Pfam</a> | <a href="#">InterPro</a> |
| BN140_1881 | <a href="#">CCJ36804</a> | two-component system, chemotaxis family, s... | <a href="#">CDD</a> | <a href="#">UniProt</a> | <a href="#">Pfam</a> | <a href="#">InterPro</a> |
| BN140_2059 | <a href="#">CCJ36982</a> | multi-sensor signal transduction histidine... | <a href="#">CDD</a> | <a href="#">UniProt</a> | <a href="#">Pfam</a> | <a href="#">InterPro</a> |
| BN140_2065 | <a href="#">CCJ36988</a> | multi-sensor signal transduction histidine... | <a href="#">CDD</a> | <a href="#">UniProt</a> | <a href="#">Pfam</a> | <a href="#">InterPro</a> |
| BN140_2169 | <a href="#">CCJ37092</a> | putative PAS/PAC sensor protein [Methanocu... | <a href="#">CDD</a> | <a href="#">UniProt</a> | <a href="#">Pfam</a> | <a href="#">InterPro</a> |
| BN140_2482 | <a href="#">CCJ37405</a> | integral membrane sensor signal transducti... | <a href="#">CDD</a> | <a href="#">UniProt</a> | <a href="#">Pfam</a> | <a href="#">InterPro</a> |
| BN140_2483 | <a href="#">CCJ37406</a> | Osmosensitive K+ channel histidine kinase ... | <a href="#">CDD</a> | <a href="#">UniProt</a> | <a href="#">Pfam</a> | <a href="#">InterPro</a> |

### **HisKA, no HATPase**

|            |                          |                                               |                     |                         |                      |                          |
|------------|--------------------------|-----------------------------------------------|---------------------|-------------------------|----------------------|--------------------------|
| BN140_0148 | <a href="#">CCJ35071</a> | putative PAS/PAC sensor protein [Methanocu... | <a href="#">CDD</a> | <a href="#">UniProt</a> | <a href="#">Pfam</a> | <a href="#">InterPro</a> |
| BN140_0356 | <a href="#">CCJ35279</a> | putative PAS/PAC sensor protein [Methanocu... | <a href="#">CDD</a> | <a href="#">UniProt</a> | <a href="#">Pfam</a> | <a href="#">InterPro</a> |
| BN140_2063 | <a href="#">CCJ36986</a> | putative PAS/PAC sensor protein [Methanocu... | <a href="#">CDD</a> | <a href="#">UniProt</a> | <a href="#">Pfam</a> | <a href="#">InterPro</a> |
| BN140_2404 | <a href="#">CCJ37327</a> | Signal transduction histidine kinase [Meth... | <a href="#">CDD</a> | <a href="#">UniProt</a> | <a href="#">Pfam</a> | <a href="#">InterPro</a> |

### **REC only**

|            |                          |                                               |                     |                         |                      |                          |
|------------|--------------------------|-----------------------------------------------|---------------------|-------------------------|----------------------|--------------------------|
| BN140_1883 | <a href="#">CCJ36806</a> | two-component system, chemotaxis family, r... | <a href="#">CDD</a> | <a href="#">UniProt</a> | <a href="#">Pfam</a> | <a href="#">InterPro</a> |
|------------|--------------------------|-----------------------------------------------|---------------------|-------------------------|----------------------|--------------------------|

### **REC-HisK**

|            |                          |                                               |                     |                         |                      |                          |
|------------|--------------------------|-----------------------------------------------|---------------------|-------------------------|----------------------|--------------------------|
| BN140_0479 | <a href="#">CCJ35402</a> | multi-sensor signal transduction histidine... | <a href="#">CDD</a> | <a href="#">UniProt</a> | <a href="#">Pfam</a> | <a href="#">InterPro</a> |
| BN140_0971 | <a href="#">CCJ35894</a> | multi-sensor signal transduction histidine... | <a href="#">CDD</a> | <a href="#">UniProt</a> | <a href="#">Pfam</a> | <a href="#">InterPro</a> |
| BN140_2006 | <a href="#">CCJ36929</a> | multi-sensor signal transduction histidine... | <a href="#">CDD</a> | <a href="#">UniProt</a> | <a href="#">Pfam</a> | <a href="#">InterPro</a> |
| BN140_2153 | <a href="#">CCJ37076</a> | multi-sensor signal transduction histidine... | <a href="#">CDD</a> | <a href="#">UniProt</a> | <a href="#">Pfam</a> | <a href="#">InterPro</a> |

### **REC-CheB**

|            |                          |                                               |                     |                         |                      |                          |
|------------|--------------------------|-----------------------------------------------|---------------------|-------------------------|----------------------|--------------------------|
| BN140_1882 | <a href="#">CCJ36805</a> | two-component system, chemotaxis family, r... | <a href="#">CDD</a> | <a href="#">UniProt</a> | <a href="#">Pfam</a> | <a href="#">InterPro</a> |
|------------|--------------------------|-----------------------------------------------|---------------------|-------------------------|----------------------|--------------------------|

### **Other RRs**

|            |                          |                                               |                     |                         |                      |                          |              |
|------------|--------------------------|-----------------------------------------------|---------------------|-------------------------|----------------------|--------------------------|--------------|
| BN140_0178 | <a href="#">CCJ35101</a> | response regulator receiver protein [Metha... | <a href="#">CDD</a> | <a href="#">UniProt</a> | <a href="#">Pfam</a> | <a href="#">InterPro</a> | (REC-MetOD2) |
|------------|--------------------------|-----------------------------------------------|---------------------|-------------------------|----------------------|--------------------------|--------------|

## Methanoculleus marisnigri JRI

### **HisK, no REC**

|            |                          |                                               |                     |                         |                      |                          |
|------------|--------------------------|-----------------------------------------------|---------------------|-------------------------|----------------------|--------------------------|
| Memar_0157 | <a href="#">ABN56092</a> | multi-sensor signal transduction histidine... | <a href="#">CDD</a> | <a href="#">UniProt</a> | <a href="#">Pfam</a> | <a href="#">InterPro</a> |
| Memar_0236 | <a href="#">ABN56170</a> | putative PAS/PAC sensor protein [Methanocu... | <a href="#">CDD</a> | <a href="#">UniProt</a> | <a href="#">Pfam</a> | <a href="#">InterPro</a> |
| Memar_0324 | <a href="#">ABN56257</a> | multi-sensor signal transduction histidine... | <a href="#">CDD</a> | <a href="#">UniProt</a> | <a href="#">Pfam</a> | <a href="#">InterPro</a> |
| Memar_0519 | <a href="#">ABN56452</a> | PAS/PAC sensor signal transduction histidi... | <a href="#">CDD</a> | <a href="#">UniProt</a> | <a href="#">Pfam</a> | <a href="#">InterPro</a> |
| Memar_0864 | <a href="#">ABN56797</a> | multi-sensor signal transduction histidine... | <a href="#">CDD</a> | <a href="#">UniProt</a> | <a href="#">Pfam</a> | <a href="#">InterPro</a> |
| Memar_0884 | <a href="#">ABN56817</a> | PAS/PAC sensor signal transduction histidi... | <a href="#">CDD</a> | <a href="#">UniProt</a> | <a href="#">Pfam</a> | <a href="#">InterPro</a> |
| Memar_0912 | <a href="#">ABN56845</a> | PAS/PAC sensor signal transduction histidi... | <a href="#">CDD</a> | <a href="#">UniProt</a> | <a href="#">Pfam</a> | <a href="#">InterPro</a> |
| Memar_0943 | <a href="#">ABN56876</a> | CheA signal transduction histidine kinases... | <a href="#">CDD</a> | <a href="#">UniProt</a> | <a href="#">Pfam</a> | <a href="#">InterPro</a> |
| Memar_1136 | <a href="#">ABN57068</a> | multi-sensor signal transduction histidine... | <a href="#">CDD</a> | <a href="#">UniProt</a> | <a href="#">Pfam</a> | <a href="#">InterPro</a> |
| Memar_1347 | <a href="#">ABN57277</a> | multi-sensor signal transduction histidine... | <a href="#">CDD</a> | <a href="#">UniProt</a> | <a href="#">Pfam</a> | <a href="#">InterPro</a> |
| Memar_1351 | <a href="#">ABN57281</a> | multi-sensor signal transduction histidine... | <a href="#">CDD</a> | <a href="#">UniProt</a> | <a href="#">Pfam</a> | <a href="#">InterPro</a> |
| Memar_1434 | <a href="#">ABN57363</a> | multi-sensor signal transduction histidine... | <a href="#">CDD</a> | <a href="#">UniProt</a> | <a href="#">Pfam</a> | <a href="#">InterPro</a> |
| Memar_1528 | <a href="#">ABN57457</a> | PAS/PAC sensor signal transduction histidi... | <a href="#">CDD</a> | <a href="#">UniProt</a> | <a href="#">Pfam</a> | <a href="#">InterPro</a> |
| Memar_1707 | <a href="#">ABN57634</a> | GAF sensor signal transduction histidine k... | <a href="#">CDD</a> | <a href="#">UniProt</a> | <a href="#">Pfam</a> | <a href="#">InterPro</a> |
| Memar_1777 | <a href="#">ABN57703</a> | PAS/PAC sensor signal transduction histidi... | <a href="#">CDD</a> | <a href="#">UniProt</a> | <a href="#">Pfam</a> | <a href="#">InterPro</a> |
| Memar_1981 | <a href="#">ABN57907</a> | PAS/PAC sensor signal transduction histidi... | <a href="#">CDD</a> | <a href="#">UniProt</a> | <a href="#">Pfam</a> | <a href="#">InterPro</a> |
| Memar_2020 | <a href="#">ABN57946</a> | multi-sensor signal transduction histidine... | <a href="#">CDD</a> | <a href="#">UniProt</a> | <a href="#">Pfam</a> | <a href="#">InterPro</a> |
| Memar_2025 | <a href="#">ABN57951</a> | multi-sensor signal transduction histidine... | <a href="#">CDD</a> | <a href="#">UniProt</a> | <a href="#">Pfam</a> | <a href="#">InterPro</a> |
| Memar_2127 | <a href="#">ABN58050</a> | multi-sensor signal transduction histidine... | <a href="#">CDD</a> | <a href="#">UniProt</a> | <a href="#">Pfam</a> | <a href="#">InterPro</a> |
| Memar_2182 | <a href="#">ABN58105</a> | multi-sensor signal transduction histidine... | <a href="#">CDD</a> | <a href="#">UniProt</a> | <a href="#">Pfam</a> | <a href="#">InterPro</a> |
| Memar_2343 | <a href="#">ABN58266</a> | integral membrane sensor signal transducti... | <a href="#">CDD</a> | <a href="#">UniProt</a> | <a href="#">Pfam</a> | <a href="#">InterPro</a> |
| Memar_2344 | <a href="#">ABN58267</a> | integral membrane sensor signal transducti... | <a href="#">CDD</a> | <a href="#">UniProt</a> | <a href="#">Pfam</a> | <a href="#">InterPro</a> |
| Memar_2345 | <a href="#">ABN58268</a> | integral membrane sensor signal transducti... | <a href="#">CDD</a> | <a href="#">UniProt</a> | <a href="#">Pfam</a> | <a href="#">InterPro</a> |

### **Hybrid HisK**

|            |                          |                                               |                     |                         |                      |                          |
|------------|--------------------------|-----------------------------------------------|---------------------|-------------------------|----------------------|--------------------------|
| Memar_0238 | <a href="#">ABN56172</a> | CheA signal transduction histidine kinase ... | <a href="#">CDD</a> | <a href="#">UniProt</a> | <a href="#">Pfam</a> | <a href="#">InterPro</a> |
|------------|--------------------------|-----------------------------------------------|---------------------|-------------------------|----------------------|--------------------------|

### **HisKA, no HATPase**

|            |                          |                                               |                     |                         |                      |                          |
|------------|--------------------------|-----------------------------------------------|---------------------|-------------------------|----------------------|--------------------------|
| Memar_0270 | <a href="#">ABN56204</a> | putative PAS/PAC sensor protein [Methanocu... | <a href="#">CDD</a> | <a href="#">UniProt</a> | <a href="#">Pfam</a> | <a href="#">InterPro</a> |
| Memar_0421 | <a href="#">ABN56354</a> | putative PAS/PAC sensor protein [Methanocu... | <a href="#">CDD</a> | <a href="#">UniProt</a> | <a href="#">Pfam</a> | <a href="#">InterPro</a> |
| Memar_1139 | <a href="#">ABN57071</a> | putative PAS/PAC sensor protein [Methanocu... | <a href="#">CDD</a> | <a href="#">UniProt</a> | <a href="#">Pfam</a> | <a href="#">InterPro</a> |
| Memar_1158 | <a href="#">ABN57089</a> | putative PAS/PAC sensor protein [Methanocu... | <a href="#">CDD</a> | <a href="#">UniProt</a> | <a href="#">Pfam</a> | <a href="#">InterPro</a> |
| Memar_1348 | <a href="#">ABN57278</a> | putative PAS/PAC sensor protein [Methanocu... | <a href="#">CDD</a> | <a href="#">UniProt</a> | <a href="#">Pfam</a> | <a href="#">InterPro</a> |
| Memar_1355 | <a href="#">ABN57285</a> | signal transduction histidine kinase, nitr... | <a href="#">CDD</a> | <a href="#">UniProt</a> | <a href="#">Pfam</a> | <a href="#">InterPro</a> |
| Memar_2294 | <a href="#">ABN58217</a> | signal transduction histidine kinase, nitr... | <a href="#">CDD</a> | <a href="#">UniProt</a> | <a href="#">Pfam</a> | <a href="#">InterPro</a> |

### **REC only**

|            |                          |                                               |                     |                         |                      |                          |
|------------|--------------------------|-----------------------------------------------|---------------------|-------------------------|----------------------|--------------------------|
| Memar_0945 | <a href="#">ABN56878</a> | response regulator receiver protein [Metha... | <a href="#">CDD</a> | <a href="#">UniProt</a> | <a href="#">Pfam</a> | <a href="#">InterPro</a> |
| Memar_2024 | <a href="#">ABN57950</a> | response regulator receiver protein [Metha... | <a href="#">CDD</a> | <a href="#">UniProt</a> | <a href="#">Pfam</a> | <a href="#">InterPro</a> |
| Memar_2126 | <a href="#">ABN58049</a> | response regulator receiver protein [Metha... | <a href="#">CDD</a> | <a href="#">UniProt</a> | <a href="#">Pfam</a> | <a href="#">InterPro</a> |

### **REC-HisK**

|            |                          |                                               |                     |                         |                      |                          |
|------------|--------------------------|-----------------------------------------------|---------------------|-------------------------|----------------------|--------------------------|
| Memar_0237 | <a href="#">ABN56171</a> | response regulator receiver protein [Metha... | <a href="#">CDD</a> | <a href="#">UniProt</a> | <a href="#">Pfam</a> | <a href="#">InterPro</a> |
| Memar_0872 | <a href="#">ABN56805</a> | multi-sensor signal transduction histidine... | <a href="#">CDD</a> | <a href="#">UniProt</a> | <a href="#">Pfam</a> | <a href="#">InterPro</a> |
| Memar_1339 | <a href="#">ABN57269</a> | multi-sensor signal transduction histidine... | <a href="#">CDD</a> | <a href="#">UniProt</a> | <a href="#">Pfam</a> | <a href="#">InterPro</a> |
| Memar_1906 | <a href="#">ABN57832</a> | multi-sensor signal transduction histidine... | <a href="#">CDD</a> | <a href="#">UniProt</a> | <a href="#">Pfam</a> | <a href="#">InterPro</a> |

### **REC-CheB**

|                  |                          |                                               |                     |                         |                      |                                       |
|------------------|--------------------------|-----------------------------------------------|---------------------|-------------------------|----------------------|---------------------------------------|
| Memar_0944       | <a href="#">ABN56877</a> | response regulator receiver protein [Metha... | <a href="#">CDD</a> | <a href="#">UniProt</a> | <a href="#">Pfam</a> | <a href="#">InterPro</a>              |
| <b>Other RRs</b> |                          |                                               |                     |                         |                      |                                       |
| Memar_0295       | <a href="#">ABN56229</a> | response regulator receiver protein [Metha... | <a href="#">CDD</a> | <a href="#">UniProt</a> | <a href="#">Pfam</a> | <a href="#">InterPro</a> (REC-MetOD2) |
| Memar_0309       | <a href="#">ABN56242</a> | response regulator receiver protein [Metha... | <a href="#">CDD</a> | <a href="#">UniProt</a> | <a href="#">Pfam</a> | <a href="#">InterPro</a> (REC-MetOD2) |

### Methanoculleus sp. MAB1

#### **HisK, no REC**

|            |                          |                                               |                     |                         |                      |                          |
|------------|--------------------------|-----------------------------------------------|---------------------|-------------------------|----------------------|--------------------------|
| MMAB1_0115 | <a href="#">CVK31332</a> | Multi-sensor signal transduction histidine... | <a href="#">CDD</a> | <a href="#">UniProt</a> | <a href="#">Pfam</a> | <a href="#">InterPro</a> |
| MMAB1_0302 | <a href="#">CVK31519</a> | Sensor histidine kinase ResE [Methanoculle... | <a href="#">CDD</a> | <a href="#">UniProt</a> | <a href="#">Pfam</a> | <a href="#">InterPro</a> |
| MMAB1_0432 | <a href="#">CVK31649</a> | Multi-sensor signal transduction histidine... | <a href="#">CDD</a> | <a href="#">UniProt</a> | <a href="#">Pfam</a> | <a href="#">InterPro</a> |
| MMAB1_0448 | <a href="#">CVK31665</a> | Putative PAS/PAC sensor protein (fragment)... | <a href="#">CDD</a> | <a href="#">UniProt</a> | <a href="#">Pfam</a> | <a href="#">InterPro</a> |
| MMAB1_0595 | <a href="#">CVK31812</a> | membrane protein of unknown function [Meth... | <a href="#">CDD</a> | <a href="#">UniProt</a> | <a href="#">Pfam</a> | <a href="#">InterPro</a> |
| MMAB1_0797 | <a href="#">CVK32011</a> | Aerobic respiration control sensor protein... | <a href="#">CDD</a> | <a href="#">UniProt</a> | <a href="#">Pfam</a> | <a href="#">InterPro</a> |
| MMAB1_0945 | <a href="#">CVK32159</a> | Sensor protein kdpD [Methanoculleus sp. MA... | <a href="#">CDD</a> | <a href="#">UniProt</a> | <a href="#">Pfam</a> | <a href="#">InterPro</a> |
| MMAB1_1547 | <a href="#">CVK32760</a> | Multi-sensor signal transduction histidine... | <a href="#">CDD</a> | <a href="#">UniProt</a> | <a href="#">Pfam</a> | <a href="#">InterPro</a> |
| MMAB1_1671 | <a href="#">CVK32884</a> | Alginate biosynthesis sensor protein kinB ... | <a href="#">CDD</a> | <a href="#">UniProt</a> | <a href="#">Pfam</a> | <a href="#">InterPro</a> |
| MMAB1_1773 | <a href="#">CVK32986</a> | Two-component system protein A [Methanocul... | <a href="#">CDD</a> | <a href="#">UniProt</a> | <a href="#">Pfam</a> | <a href="#">InterPro</a> |
| MMAB1_2418 | <a href="#">CVK33631</a> | Two-component system, chemotaxis family, s... | <a href="#">CDD</a> | <a href="#">UniProt</a> | <a href="#">Pfam</a> | <a href="#">InterPro</a> |
| MMAB1_2671 | <a href="#">CVK33884</a> | Sporulation kinase A [Methanoculleus sp. M... | <a href="#">CDD</a> | <a href="#">UniProt</a> | <a href="#">Pfam</a> | <a href="#">InterPro</a> |
| MMAB1_2680 | <a href="#">CVK33893</a> | Multi-sensor signal transduction histidine... | <a href="#">CDD</a> | <a href="#">UniProt</a> | <a href="#">Pfam</a> | <a href="#">InterPro</a> |
| MMAB1_2853 | <a href="#">CVK34066</a> | Signal transduction histidine-protein kina... | <a href="#">CDD</a> | <a href="#">UniProt</a> | <a href="#">Pfam</a> | <a href="#">InterPro</a> |
| MMAB1_3343 | <a href="#">CVK34556</a> | Signal transduction histidine-protein kina... | <a href="#">CDD</a> | <a href="#">UniProt</a> | <a href="#">Pfam</a> | <a href="#">InterPro</a> |
| MMAB1_3344 | <a href="#">CVK34557</a> | Sensor protein kdpD [Methanoculleus sp. MA... | <a href="#">CDD</a> | <a href="#">UniProt</a> | <a href="#">Pfam</a> | <a href="#">InterPro</a> |

#### **HisKA, no HATPase**

|            |                          |                                               |                     |                         |                      |                          |
|------------|--------------------------|-----------------------------------------------|---------------------|-------------------------|----------------------|--------------------------|
| MMAB1_0192 | <a href="#">CVK31409</a> | putative PAS/PAC sensor protein [Methanocu... | <a href="#">CDD</a> | <a href="#">UniProt</a> | <a href="#">Pfam</a> | <a href="#">InterPro</a> |
| MMAB1_2678 | <a href="#">CVK33891</a> | putative PAS/PAC sensor protein [Methanocu... | <a href="#">CDD</a> | <a href="#">UniProt</a> | <a href="#">Pfam</a> | <a href="#">InterPro</a> |
| MMAB1_2873 | <a href="#">CVK34086</a> | Sporulation kinase A [Methanoculleus sp. M... | <a href="#">CDD</a> | <a href="#">UniProt</a> | <a href="#">Pfam</a> | <a href="#">InterPro</a> |
| MMAB1_2961 | <a href="#">CVK34174</a> | putative PAS/PAC sensor protein [Methanocu... | <a href="#">CDD</a> | <a href="#">UniProt</a> | <a href="#">Pfam</a> | <a href="#">InterPro</a> |
| MMAB1_3199 | <a href="#">CVK34412</a> | putative PAS/PAC sensor protein [Methanocu... | <a href="#">CDD</a> | <a href="#">UniProt</a> | <a href="#">Pfam</a> | <a href="#">InterPro</a> |

#### **REC only**

|            |                          |                                               |                     |                         |                      |                          |
|------------|--------------------------|-----------------------------------------------|---------------------|-------------------------|----------------------|--------------------------|
| MMAB1_2420 | <a href="#">CVK33633</a> | regulator of chemotaxis and motility [Meth... | <a href="#">CDD</a> | <a href="#">UniProt</a> | <a href="#">Pfam</a> | <a href="#">InterPro</a> |
|------------|--------------------------|-----------------------------------------------|---------------------|-------------------------|----------------------|--------------------------|

#### **REC-HisK**

|            |                          |                                               |                     |                         |                      |                          |
|------------|--------------------------|-----------------------------------------------|---------------------|-------------------------|----------------------|--------------------------|
| MMAB1_2597 | <a href="#">CVK33810</a> | Sensor protein kdpD [Methanoculleus sp. MA... | <a href="#">CDD</a> | <a href="#">UniProt</a> | <a href="#">Pfam</a> | <a href="#">InterPro</a> |
|------------|--------------------------|-----------------------------------------------|---------------------|-------------------------|----------------------|--------------------------|

#### **REC-CheB**

|            |                          |                                               |                     |                         |                      |                          |
|------------|--------------------------|-----------------------------------------------|---------------------|-------------------------|----------------------|--------------------------|
| MMAB1_2419 | <a href="#">CVK33632</a> | Chemotaxis response regulator protein-glut... | <a href="#">CDD</a> | <a href="#">UniProt</a> | <a href="#">Pfam</a> | <a href="#">InterPro</a> |
|------------|--------------------------|-----------------------------------------------|---------------------|-------------------------|----------------------|--------------------------|

#### **REC-PAS**

|            |                          |                                               |                     |                         |                      |                                    |
|------------|--------------------------|-----------------------------------------------|---------------------|-------------------------|----------------------|------------------------------------|
| MMAB1_2854 | <a href="#">CVK34067</a> | protein of unknown function [Methanoculleu... | <a href="#">CDD</a> | <a href="#">UniProt</a> | <a href="#">Pfam</a> | <a href="#">InterPro</a> (REC-PAS) |
|------------|--------------------------|-----------------------------------------------|---------------------|-------------------------|----------------------|------------------------------------|

#### **Other RRs**

|            |                          |                                            |                     |                         |                      |                                       |
|------------|--------------------------|--------------------------------------------|---------------------|-------------------------|----------------------|---------------------------------------|
| MMAB1_0227 | <a href="#">CVK31444</a> | Protein pilH [Methanoculleus sp. MAB1] ... | <a href="#">CDD</a> | <a href="#">UniProt</a> | <a href="#">Pfam</a> | <a href="#">InterPro</a> (REC-MetOD2) |
|------------|--------------------------|--------------------------------------------|---------------------|-------------------------|----------------------|---------------------------------------|

### Methanofollis liminatans DSM 4140

#### **HisK, no REC**

|            |                          |                                               |                     |                         |                      |                          |
|------------|--------------------------|-----------------------------------------------|---------------------|-------------------------|----------------------|--------------------------|
| Metli_0189 | <a href="#">EJG06164</a> | histidine kinase [Methanofollis liminatans... | <a href="#">CDD</a> | <a href="#">UniProt</a> | <a href="#">Pfam</a> | <a href="#">InterPro</a> |
| Metli_0420 | <a href="#">EJG06388</a> | PAS/PAC sensor signal transduction histidi... | <a href="#">CDD</a> | <a href="#">UniProt</a> | <a href="#">Pfam</a> | <a href="#">InterPro</a> |
| Metli_0960 | <a href="#">EJG06918</a> | PAS/PAC sensor signal transduction histidi... | <a href="#">CDD</a> | <a href="#">UniProt</a> | <a href="#">Pfam</a> | <a href="#">InterPro</a> |
| Metli_1172 | <a href="#">EJG07128</a> | histidine kinase [Methanofollis liminatans... | <a href="#">CDD</a> | <a href="#">UniProt</a> | <a href="#">Pfam</a> | <a href="#">InterPro</a> |
| Metli_1245 | <a href="#">EJG07201</a> | CheA signal transduction histidine kinase ... | <a href="#">CDD</a> | <a href="#">UniProt</a> | <a href="#">Pfam</a> | <a href="#">InterPro</a> |
| Metli_1399 | <a href="#">EJG07351</a> | Cache sensor signal transduction histidine... | <a href="#">CDD</a> | <a href="#">UniProt</a> | <a href="#">Pfam</a> | <a href="#">InterPro</a> |
| Metli_1751 | <a href="#">EJG07695</a> | histidine kinase [Methanofollis liminatans... | <a href="#">CDD</a> | <a href="#">UniProt</a> | <a href="#">Pfam</a> | <a href="#">InterPro</a> |
| Metli_1822 | <a href="#">EJG07766</a> | histidine kinase [Methanofollis liminatans... | <a href="#">CDD</a> | <a href="#">UniProt</a> | <a href="#">Pfam</a> | <a href="#">InterPro</a> |
| Metli_2158 | <a href="#">EJG08099</a> | GAF sensor signal transduction histidine k... | <a href="#">CDD</a> | <a href="#">UniProt</a> | <a href="#">Pfam</a> | <a href="#">InterPro</a> |
| Metli_2218 | <a href="#">EJG08159</a> | multi-sensor signal transduction histidine... | <a href="#">CDD</a> | <a href="#">UniProt</a> | <a href="#">Pfam</a> | <a href="#">InterPro</a> |
| Metli_2328 | <a href="#">EJG08266</a> | PAS/PAC sensor signal transduction histidi... | <a href="#">CDD</a> | <a href="#">UniProt</a> | <a href="#">Pfam</a> | <a href="#">InterPro</a> |
| Metli_2453 | <a href="#">EJG08390</a> | PAS/PAC sensor signal transduction histidi... | <a href="#">CDD</a> | <a href="#">UniProt</a> | <a href="#">Pfam</a> | <a href="#">InterPro</a> |
| Metli_2464 | <a href="#">EJG08401</a> | multi-sensor signal transduction histidine... | <a href="#">CDD</a> | <a href="#">UniProt</a> | <a href="#">Pfam</a> | <a href="#">InterPro</a> |

#### **Hybrid HisK**

|            |                          |                                               |                     |                         |                      |                          |
|------------|--------------------------|-----------------------------------------------|---------------------|-------------------------|----------------------|--------------------------|
| Metli_0113 | <a href="#">EJG06091</a> | PAS/PAC sensor hybrid histidine kinase [Me... | <a href="#">CDD</a> | <a href="#">UniProt</a> | <a href="#">Pfam</a> | <a href="#">InterPro</a> |
| Metli_1831 | <a href="#">EJG07775</a> | PAS/PAC sensor hybrid histidine kinase [Me... | <a href="#">CDD</a> | <a href="#">UniProt</a> | <a href="#">Pfam</a> | <a href="#">InterPro</a> |
| Metli_1888 | <a href="#">EJG07832</a> | PAS/PAC sensor hybrid histidine kinase [Me... | <a href="#">CDD</a> | <a href="#">UniProt</a> | <a href="#">Pfam</a> | <a href="#">InterPro</a> |
| Metli_2455 | <a href="#">EJG08392</a> | CheA signal transduction histidine kinase ... | <a href="#">CDD</a> | <a href="#">UniProt</a> | <a href="#">Pfam</a> | <a href="#">InterPro</a> |

#### **HisKA, no HATPase**

|            |                          |                                               |                     |                         |                      |                          |
|------------|--------------------------|-----------------------------------------------|---------------------|-------------------------|----------------------|--------------------------|
| Metli_0101 | <a href="#">EJG06079</a> | putative PAS/PAC sensor protein [Methanofo... | <a href="#">CDD</a> | <a href="#">UniProt</a> | <a href="#">Pfam</a> | <a href="#">InterPro</a> |
|------------|--------------------------|-----------------------------------------------|---------------------|-------------------------|----------------------|--------------------------|

#### **REC only**

|            |                          |                                               |                     |                         |                      |                          |
|------------|--------------------------|-----------------------------------------------|---------------------|-------------------------|----------------------|--------------------------|
| Metli_0541 | <a href="#">EJG06509</a> | response regulator receiver protein [Metha... | <a href="#">CDD</a> | <a href="#">UniProt</a> | <a href="#">Pfam</a> | <a href="#">InterPro</a> |
| Metli_1243 | <a href="#">EJG07199</a> | response regulator receiver protein [Metha... | <a href="#">CDD</a> | <a href="#">UniProt</a> | <a href="#">Pfam</a> | <a href="#">InterPro</a> |
| Metli_1398 | <a href="#">EJG07350</a> | response regulator receiver protein [Metha... | <a href="#">CDD</a> | <a href="#">UniProt</a> | <a href="#">Pfam</a> | <a href="#">InterPro</a> |
| Metli_2274 | <a href="#">EJG08213</a> | response regulator receiver protein [Metha... | <a href="#">CDD</a> | <a href="#">UniProt</a> | <a href="#">Pfam</a> | <a href="#">InterPro</a> |

#### **REC-HisK**

|            |                          |                                               |                     |                         |                      |                          |
|------------|--------------------------|-----------------------------------------------|---------------------|-------------------------|----------------------|--------------------------|
| Metli_0125 | <a href="#">EJG06103</a> | multi-sensor signal transduction histidine... | <a href="#">CDD</a> | <a href="#">UniProt</a> | <a href="#">Pfam</a> | <a href="#">InterPro</a> |
| Metli_1069 | <a href="#">EJG07026</a> | multi-sensor signal transduction histidine... | <a href="#">CDD</a> | <a href="#">UniProt</a> | <a href="#">Pfam</a> | <a href="#">InterPro</a> |
| Metli_1175 | <a href="#">EJG07131</a> | multi-sensor signal transduction histidine... | <a href="#">CDD</a> | <a href="#">UniProt</a> | <a href="#">Pfam</a> | <a href="#">InterPro</a> |
| Metli_1388 | <a href="#">EJG07340</a> | multi-sensor signal transduction histidine... | <a href="#">CDD</a> | <a href="#">UniProt</a> | <a href="#">Pfam</a> | <a href="#">InterPro</a> |
| Metli_1592 | <a href="#">EJG07540</a> | multi-sensor signal transduction histidine... | <a href="#">CDD</a> | <a href="#">UniProt</a> | <a href="#">Pfam</a> | <a href="#">InterPro</a> |
| Metli_2000 | <a href="#">EJG07942</a> | multi-sensor signal transduction histidine... | <a href="#">CDD</a> | <a href="#">UniProt</a> | <a href="#">Pfam</a> | <a href="#">InterPro</a> |
| Metli_2114 | <a href="#">EJG08055</a> | multi-sensor signal transduction histidine... | <a href="#">CDD</a> | <a href="#">UniProt</a> | <a href="#">Pfam</a> | <a href="#">InterPro</a> |
| Metli_2375 | <a href="#">EJG08313</a> | multi-sensor signal transduction histidine... | <a href="#">CDD</a> | <a href="#">UniProt</a> | <a href="#">Pfam</a> | <a href="#">InterPro</a> |
| Metli_2454 | <a href="#">EJG08391</a> | response regulator receiver sensor signal ... | <a href="#">CDD</a> | <a href="#">UniProt</a> | <a href="#">Pfam</a> | <a href="#">InterPro</a> |



|                    |                          |                                               |                     |                         |                      |                          |              |
|--------------------|--------------------------|-----------------------------------------------|---------------------|-------------------------|----------------------|--------------------------|--------------|
| <b>REC-CheB</b>    |                          |                                               |                     |                         |                      |                          |              |
| Metli_1244         | <a href="#">EJG07200</a> | multi-sensor signal transduction histidine... | <a href="#">CDD</a> | <a href="#">UniProt</a> | <a href="#">Pfam</a> | <a href="#">InterPro</a> |              |
| <b>REC-PAS</b>     |                          |                                               |                     |                         |                      |                          |              |
| Metli_0300         | <a href="#">EJG06272</a> | putative PAS/PAC sensor protein [Methanofo... | <a href="#">CDD</a> | <a href="#">UniProt</a> | <a href="#">Pfam</a> | <a href="#">InterPro</a> |              |
| Metli_1397         | <a href="#">EJG07349</a> | putative PAS/PAC sensor protein [Methanofo... | <a href="#">CDD</a> | <a href="#">UniProt</a> | <a href="#">Pfam</a> | <a href="#">InterPro</a> |              |
| Metli_1585         | <a href="#">EJG07535</a> | putative PAS/PAC sensor protein [Methanofo... | <a href="#">CDD</a> | <a href="#">UniProt</a> | <a href="#">Pfam</a> | <a href="#">InterPro</a> |              |
| Metli_1993         | <a href="#">EJG07935</a> | putative PAS/PAC sensor protein [Methanofo... | <a href="#">CDD</a> | <a href="#">UniProt</a> | <a href="#">Pfam</a> | <a href="#">InterPro</a> |              |
| <b>REC-PAS-GAF</b> |                          |                                               |                     |                         |                      |                          |              |
| Metli_1723         | <a href="#">EJG07667</a> | putative PAS/PAC sensor protein [Methanofo... | <a href="#">CDD</a> | <a href="#">UniProt</a> | <a href="#">Pfam</a> | <a href="#">InterPro</a> |              |
| <b>Other RRs</b>   |                          |                                               |                     |                         |                      |                          |              |
| Metli_1973         | <a href="#">EJG07916</a> | response regulator receiver protein [Metha... | <a href="#">CDD</a> | <a href="#">UniProt</a> | <a href="#">Pfam</a> | <a href="#">InterPro</a> | (REC-MetOD2) |

### [methanogenic archaeon ISO4-H5](#)

|                               |                          |                                               |                     |                         |                      |                          |            |
|-------------------------------|--------------------------|-----------------------------------------------|---------------------|-------------------------|----------------------|--------------------------|------------|
| <b>HisKin</b>                 |                          |                                               |                     |                         |                      |                          |            |
| AR505_0788                    | <a href="#">AMH94509</a> | signal transduction histidine kinase [meth... | <a href="#">CDD</a> | <a href="#">UniProt</a> | <a href="#">Pfam</a> | <a href="#">InterPro</a> |            |
| AR505_0791                    | <a href="#">AMH94512</a> | transcriptional regulator LytS family [met... | <a href="#">CDD</a> | <a href="#">UniProt</a> | <a href="#">Pfam</a> | <a href="#">InterPro</a> |            |
| AR505_1170                    | <a href="#">AMH94885</a> | signal transduction histidine kinase [meth... | <a href="#">CDD</a> | <a href="#">UniProt</a> | <a href="#">Pfam</a> | <a href="#">InterPro</a> |            |
| <b>OmpR family (REC-wHTH)</b> |                          |                                               |                     |                         |                      |                          |            |
| AR505_0790                    | <a href="#">AMH94511</a> | transcriptional regulator LytR family [met... | <a href="#">CDD</a> | <a href="#">UniProt</a> | <a href="#">Pfam</a> | <a href="#">InterPro</a> | (REC-wHTH) |

### [Methanohalobium evestigatum Z-7303](#)

|                     |                          |                                               |                     |                         |                      |                          |              |
|---------------------|--------------------------|-----------------------------------------------|---------------------|-------------------------|----------------------|--------------------------|--------------|
| <b>HisK, no REC</b> |                          |                                               |                     |                         |                      |                          |              |
| Metev_0371          | <a href="#">ADI73293</a> | integral membrane sensor signal transducti... | <a href="#">CDD</a> | <a href="#">UniProt</a> | <a href="#">Pfam</a> | <a href="#">InterPro</a> |              |
| Metev_0374          | <a href="#">ADI73296</a> | histidine kinase [Methanohalobium evestiga... | <a href="#">CDD</a> | <a href="#">UniProt</a> | <a href="#">Pfam</a> | <a href="#">InterPro</a> |              |
| Metev_0376          | <a href="#">ADI73298</a> | multi-sensor signal transduction histidine... | <a href="#">CDD</a> | <a href="#">UniProt</a> | <a href="#">Pfam</a> | <a href="#">InterPro</a> |              |
| Metev_0453          | <a href="#">ADI73368</a> | signal transduction histidine kinase [Meth... | <a href="#">CDD</a> | <a href="#">UniProt</a> | <a href="#">Pfam</a> | <a href="#">InterPro</a> |              |
| Metev_0761          | <a href="#">ADI73662</a> | signal transduction histidine kinase (plas... | <a href="#">CDD</a> | <a href="#">UniProt</a> | <a href="#">Pfam</a> | <a href="#">InterPro</a> |              |
| Metev_0867          | <a href="#">ADI73765</a> | CheA signal transduction histidine kinase ... | <a href="#">CDD</a> | <a href="#">UniProt</a> | <a href="#">Pfam</a> | <a href="#">InterPro</a> |              |
| Metev_0983          | <a href="#">ADI73874</a> | signal transduction histidine kinase [Meth... | <a href="#">CDD</a> | <a href="#">UniProt</a> | <a href="#">Pfam</a> | <a href="#">InterPro</a> |              |
| Metev_1007          | <a href="#">ADI73896</a> | signal transduction histidine kinase [Meth... | <a href="#">CDD</a> | <a href="#">UniProt</a> | <a href="#">Pfam</a> | <a href="#">InterPro</a> |              |
| Metev_1009          | <a href="#">ADI73898</a> | signal transduction histidine kinase [Meth... | <a href="#">CDD</a> | <a href="#">UniProt</a> | <a href="#">Pfam</a> | <a href="#">InterPro</a> |              |
| Metev_1091          | <a href="#">ADI73975</a> | PAS/PAC sensor signal transduction histidi... | <a href="#">CDD</a> | <a href="#">UniProt</a> | <a href="#">Pfam</a> | <a href="#">InterPro</a> |              |
| Metev_1139          | <a href="#">ADI74021</a> | PAS/PAC sensor signal transduction histidi... | <a href="#">CDD</a> | <a href="#">UniProt</a> | <a href="#">Pfam</a> | <a href="#">InterPro</a> |              |
| Metev_1140          | <a href="#">ADI74022</a> | PAS/PAC sensor signal transduction histidi... | <a href="#">CDD</a> | <a href="#">UniProt</a> | <a href="#">Pfam</a> | <a href="#">InterPro</a> |              |
| Metev_1154          | <a href="#">ADI74035</a> | multi-sensor signal transduction histidine... | <a href="#">CDD</a> | <a href="#">UniProt</a> | <a href="#">Pfam</a> | <a href="#">InterPro</a> |              |
| Metev_1155          | <a href="#">ADI74036</a> | PAS/PAC sensor signal transduction histidi... | <a href="#">CDD</a> | <a href="#">UniProt</a> | <a href="#">Pfam</a> | <a href="#">InterPro</a> |              |
| Metev_1156          | <a href="#">ADI74037</a> | PAS/PAC sensor signal transduction histidi... | <a href="#">CDD</a> | <a href="#">UniProt</a> | <a href="#">Pfam</a> | <a href="#">InterPro</a> |              |
| Metev_1164          | <a href="#">ADI74045</a> | PAS/PAC sensor signal transduction histidi... | <a href="#">CDD</a> | <a href="#">UniProt</a> | <a href="#">Pfam</a> | <a href="#">InterPro</a> |              |
| Metev_1165          | <a href="#">ADI74046</a> | signal transduction histidine kinase [Meth... | <a href="#">CDD</a> | <a href="#">UniProt</a> | <a href="#">Pfam</a> | <a href="#">InterPro</a> |              |
| Metev_1291          | <a href="#">ADI74154</a> | signal transduction histidine kinase [Meth... | <a href="#">CDD</a> | <a href="#">UniProt</a> | <a href="#">Pfam</a> | <a href="#">InterPro</a> |              |
| Metev_1454          | <a href="#">ADI74308</a> | signal transduction histidine kinase [Meth... | <a href="#">CDD</a> | <a href="#">UniProt</a> | <a href="#">Pfam</a> | <a href="#">InterPro</a> |              |
| Metev_1536          | <a href="#">ADI74386</a> | multi-sensor signal transduction histidine... | <a href="#">CDD</a> | <a href="#">UniProt</a> | <a href="#">Pfam</a> | <a href="#">InterPro</a> |              |
| Metev_1589          | <a href="#">ADI74434</a> | PAS/PAC sensor signal transduction histidi... | <a href="#">CDD</a> | <a href="#">UniProt</a> | <a href="#">Pfam</a> | <a href="#">InterPro</a> |              |
| Metev_1590          | <a href="#">ADI74435</a> | PAS/PAC sensor signal transduction histidi... | <a href="#">CDD</a> | <a href="#">UniProt</a> | <a href="#">Pfam</a> | <a href="#">InterPro</a> |              |
| Metev_1701          | <a href="#">ADI74540</a> | signal transduction histidine kinase [Meth... | <a href="#">CDD</a> | <a href="#">UniProt</a> | <a href="#">Pfam</a> | <a href="#">InterPro</a> |              |
| Metev_1711          | <a href="#">ADI74550</a> | PAS/PAC sensor signal transduction histidi... | <a href="#">CDD</a> | <a href="#">UniProt</a> | <a href="#">Pfam</a> | <a href="#">InterPro</a> |              |
| Metev_1743          | <a href="#">ADI74581</a> | signal transduction histidine kinase [Meth... | <a href="#">CDD</a> | <a href="#">UniProt</a> | <a href="#">Pfam</a> | <a href="#">InterPro</a> |              |
| Metev_1934          | <a href="#">ADI74764</a> | multi-sensor signal transduction histidine... | <a href="#">CDD</a> | <a href="#">UniProt</a> | <a href="#">Pfam</a> | <a href="#">InterPro</a> |              |
| Metev_2106          | <a href="#">ADI74933</a> | signal transduction histidine kinase [Meth... | <a href="#">CDD</a> | <a href="#">UniProt</a> | <a href="#">Pfam</a> | <a href="#">InterPro</a> |              |
| Metev_2266          | <a href="#">ADI75085</a> | multi-sensor signal transduction histidine... | <a href="#">CDD</a> | <a href="#">UniProt</a> | <a href="#">Pfam</a> | <a href="#">InterPro</a> |              |
| Metev_2315          | <a href="#">ADI75127</a> | signal transduction histidine kinase (plas... | <a href="#">CDD</a> | <a href="#">UniProt</a> | <a href="#">Pfam</a> | <a href="#">InterPro</a> |              |
| <b>REC only</b>     |                          |                                               |                     |                         |                      |                          |              |
| Metev_0049          | <a href="#">ADI72981</a> | response regulator receiver protein [Metha... | <a href="#">CDD</a> | <a href="#">UniProt</a> | <a href="#">Pfam</a> | <a href="#">InterPro</a> |              |
| Metev_0865          | <a href="#">ADI73763</a> | response regulator receiver protein [Metha... | <a href="#">CDD</a> | <a href="#">UniProt</a> | <a href="#">Pfam</a> | <a href="#">InterPro</a> |              |
| Metev_1008          | <a href="#">ADI73897</a> | response regulator receiver protein [Metha... | <a href="#">CDD</a> | <a href="#">UniProt</a> | <a href="#">Pfam</a> | <a href="#">InterPro</a> |              |
| Metev_1010          | <a href="#">ADI73899</a> | response regulator receiver protein [Metha... | <a href="#">CDD</a> | <a href="#">UniProt</a> | <a href="#">Pfam</a> | <a href="#">InterPro</a> |              |
| Metev_1867          | <a href="#">ADI74700</a> | response regulator receiver protein [Metha... | <a href="#">CDD</a> | <a href="#">UniProt</a> | <a href="#">Pfam</a> | <a href="#">InterPro</a> |              |
| Metev_2220          | <a href="#">ADI75046</a> | response regulator receiver protein [Metha... | <a href="#">CDD</a> | <a href="#">UniProt</a> | <a href="#">Pfam</a> | <a href="#">InterPro</a> |              |
| Metev_2337          | <a href="#">ADI75149</a> | response regulator receiver protein [Metha... | <a href="#">CDD</a> | <a href="#">UniProt</a> | <a href="#">Pfam</a> | <a href="#">InterPro</a> |              |
| <b>REC-CheB</b>     |                          |                                               |                     |                         |                      |                          |              |
| Metev_0866          | <a href="#">ADI73764</a> | response regulator receiver modulated CheB... | <a href="#">CDD</a> | <a href="#">UniProt</a> | <a href="#">Pfam</a> | <a href="#">InterPro</a> |              |
| <b>REC-MetOD1</b>   |                          |                                               |                     |                         |                      |                          |              |
| Metev_1159          | <a href="#">ADI74040</a> | response regulator receiver protein [Metha... | <a href="#">CDD</a> | <a href="#">UniProt</a> | <a href="#">Pfam</a> | <a href="#">InterPro</a> | (REC-MetOD1) |
| Metev_1574          | <a href="#">ADI74421</a> | response regulator receiver protein [Metha... | <a href="#">CDD</a> | <a href="#">UniProt</a> | <a href="#">Pfam</a> | <a href="#">InterPro</a> | (REC-MetOD1) |
| <b>Other RRs</b>    |                          |                                               |                     |                         |                      |                          |              |
| Metev_1321          | <a href="#">ADI74181</a> | response regulator receiver protein [Metha... | <a href="#">CDD</a> | <a href="#">UniProt</a> | <a href="#">Pfam</a> | <a href="#">InterPro</a> | (KaiC-REC)   |

### [Methanohalophilus halophilus Z-7982](#)

|                     |                          |                                              |                     |                         |                      |                          |  |
|---------------------|--------------------------|----------------------------------------------|---------------------|-------------------------|----------------------|--------------------------|--|
| <b>HisK, no REC</b> |                          |                                              |                     |                         |                      |                          |  |
| BHR79_00425         | <a href="#">APH38092</a> | hypothetical protein BHR79_00425 [Methano... | <a href="#">CDD</a> | <a href="#">UniProt</a> | <a href="#">Pfam</a> | <a href="#">InterPro</a> |  |
| BHR79_00710         | <a href="#">APH38146</a> | hypothetical protein BHR79_00710 [Methano... | <a href="#">CDD</a> | <a href="#">UniProt</a> | <a href="#">Pfam</a> | <a href="#">InterPro</a> |  |
| BHR79_00945         | <a href="#">APH38186</a> | Two-component sensor histidine kinase, co... | <a href="#">CDD</a> | <a href="#">UniProt</a> | <a href="#">Pfam</a> | <a href="#">InterPro</a> |  |
| BHR79_01420         | <a href="#">APH38273</a> | hypothetical protein BHR79_01420 [Methano... | <a href="#">CDD</a> | <a href="#">UniProt</a> | <a href="#">Pfam</a> | <a href="#">InterPro</a> |  |
| BHR79_01795         | <a href="#">APH38341</a> | hypothetical protein BHR79_01795 [Methano... | <a href="#">CDD</a> | <a href="#">UniProt</a> | <a href="#">Pfam</a> | <a href="#">InterPro</a> |  |
| BHR79_02095         | <a href="#">APH38395</a> | hypothetical protein BHR79_02095 [Methano... | <a href="#">CDD</a> | <a href="#">UniProt</a> | <a href="#">Pfam</a> | <a href="#">InterPro</a> |  |
| BHR79_03265         | <a href="#">APH38600</a> | hypothetical protein BHR79_03265 [Methano... | <a href="#">CDD</a> | <a href="#">UniProt</a> | <a href="#">Pfam</a> | <a href="#">InterPro</a> |  |

|                    |                          |                                              |                     |                         |                      |                          |                  |
|--------------------|--------------------------|----------------------------------------------|---------------------|-------------------------|----------------------|--------------------------|------------------|
| BHR79_03370        | <a href="#">APH38620</a> | hypothetical protein BHR79_03370 [Methano... | <a href="#">CDD</a> | <a href="#">UniProt</a> | <a href="#">Pfam</a> | <a href="#">InterPro</a> |                  |
| BHR79_03665        | <a href="#">APH38671</a> | hypothetical protein BHR79_03665 [Methano... | <a href="#">CDD</a> | <a href="#">UniProt</a> | <a href="#">Pfam</a> | <a href="#">InterPro</a> |                  |
| BHR79_06215        | <a href="#">APH39117</a> | histidine kinase [Methanohalophilus halop... | <a href="#">CDD</a> | <a href="#">UniProt</a> | <a href="#">Pfam</a> | <a href="#">InterPro</a> |                  |
| BHR79_06570        | <a href="#">APH39180</a> | hypothetical protein BHR79_06570 [Methano... | <a href="#">CDD</a> | <a href="#">UniProt</a> | <a href="#">Pfam</a> | <a href="#">InterPro</a> |                  |
| BHR79_06695        | <a href="#">APH39204</a> | hypothetical protein BHR79_06695 [Methano... | <a href="#">CDD</a> | <a href="#">UniProt</a> | <a href="#">Pfam</a> | <a href="#">InterPro</a> |                  |
| BHR79_07285        | <a href="#">APH39303</a> | hypothetical protein BHR79_07285 [Methano... | <a href="#">CDD</a> | <a href="#">UniProt</a> | <a href="#">Pfam</a> | <a href="#">InterPro</a> |                  |
| BHR79_07290        | <a href="#">APH39304</a> | histidine kinase [Methanohalophilus halop... | <a href="#">CDD</a> | <a href="#">UniProt</a> | <a href="#">Pfam</a> | <a href="#">InterPro</a> |                  |
| BHR79_07785        | <a href="#">APH39390</a> | histidine kinase [Methanohalophilus halop... | <a href="#">CDD</a> | <a href="#">UniProt</a> | <a href="#">Pfam</a> | <a href="#">InterPro</a> |                  |
| BHR79_08165        | <a href="#">APH39458</a> | C50 carotenoid epsilon cyclase [Methanoha... | <a href="#">CDD</a> | <a href="#">UniProt</a> | <a href="#">Pfam</a> | <a href="#">InterPro</a> |                  |
| BHR79_08245        | <a href="#">APH39471</a> | hypothetical protein BHR79_08245 [Methano... | <a href="#">CDD</a> | <a href="#">UniProt</a> | <a href="#">Pfam</a> | <a href="#">InterPro</a> |                  |
| BHR79_08250        | <a href="#">APH39472</a> | hypothetical protein BHR79_08250 [Methano... | <a href="#">CDD</a> | <a href="#">UniProt</a> | <a href="#">Pfam</a> | <a href="#">InterPro</a> |                  |
| BHR79_08590        | <a href="#">APH39531</a> | Two-component sensor histidine kinase, co... | <a href="#">CDD</a> | <a href="#">UniProt</a> | <a href="#">Pfam</a> | <a href="#">InterPro</a> |                  |
| BHR79_08905        | <a href="#">APH39586</a> | hypothetical protein BHR79_08905 [Methano... | <a href="#">CDD</a> | <a href="#">UniProt</a> | <a href="#">Pfam</a> | <a href="#">InterPro</a> |                  |
| BHR79_09380        | <a href="#">APH39670</a> | hypothetical protein BHR79_09380 [Methano... | <a href="#">CDD</a> | <a href="#">UniProt</a> | <a href="#">Pfam</a> | <a href="#">InterPro</a> |                  |
| BHR79_09430        | <a href="#">APH39680</a> | histidine kinase [Methanohalophilus halop... | <a href="#">CDD</a> | <a href="#">UniProt</a> | <a href="#">Pfam</a> | <a href="#">InterPro</a> |                  |
| BHR79_10040        | <a href="#">APH39782</a> | hypothetical protein BHR79_10040 [Methano... | <a href="#">CDD</a> | <a href="#">UniProt</a> | <a href="#">Pfam</a> | <a href="#">InterPro</a> |                  |
| BHR79_10050        | <a href="#">APH39783</a> | hypothetical protein BHR79_10050 [Methano... | <a href="#">CDD</a> | <a href="#">UniProt</a> | <a href="#">Pfam</a> | <a href="#">InterPro</a> |                  |
| <b>Hybrid HisK</b> |                          |                                              |                     |                         |                      |                          |                  |
| BHR79_02040        | <a href="#">APH38385</a> | hypothetical protein BHR79_02040 [Methano... | <a href="#">CDD</a> | <a href="#">UniProt</a> | <a href="#">Pfam</a> | <a href="#">InterPro</a> |                  |
| BHR79_07310        | <a href="#">APH39307</a> | hypothetical protein BHR79_07310 [Methano... | <a href="#">CDD</a> | <a href="#">UniProt</a> | <a href="#">Pfam</a> | <a href="#">InterPro</a> |                  |
| <b>REC only</b>    |                          |                                              |                     |                         |                      |                          |                  |
| BHR79_00950        | <a href="#">APH38187</a> | two-component system response regulator [... | <a href="#">CDD</a> | <a href="#">UniProt</a> | <a href="#">Pfam</a> | <a href="#">InterPro</a> |                  |
| BHR79_02035        | <a href="#">APH38384</a> | two-component system response regulator [... | <a href="#">CDD</a> | <a href="#">UniProt</a> | <a href="#">Pfam</a> | <a href="#">InterPro</a> |                  |
| BHR79_04435        | <a href="#">APH38809</a> | two-component system response regulator [... | <a href="#">CDD</a> | <a href="#">UniProt</a> | <a href="#">Pfam</a> | <a href="#">InterPro</a> |                  |
| BHR79_06225        | <a href="#">APH39119</a> | hypothetical protein BHR79_06225 [Methano... | <a href="#">CDD</a> | <a href="#">UniProt</a> | <a href="#">Pfam</a> | <a href="#">InterPro</a> |                  |
| BHR79_06820        | <a href="#">APH39226</a> | two-component system response regulator [... | <a href="#">CDD</a> | <a href="#">UniProt</a> | <a href="#">Pfam</a> | <a href="#">InterPro</a> |                  |
| BHR79_07790        | <a href="#">APH39391</a> | two-component system response regulator [... | <a href="#">CDD</a> | <a href="#">UniProt</a> | <a href="#">Pfam</a> | <a href="#">InterPro</a> |                  |
| BHR79_07890        | <a href="#">APH39407</a> | hypothetical protein BHR79_07890 [Methano... | <a href="#">CDD</a> | <a href="#">UniProt</a> | <a href="#">Pfam</a> | <a href="#">InterPro</a> |                  |
| <b>REC-HisK</b>    |                          |                                              |                     |                         |                      |                          |                  |
| BHR79_00325        | <a href="#">APH38076</a> | hypothetical protein BHR79_00325 [Methano... | <a href="#">CDD</a> | <a href="#">UniProt</a> | <a href="#">Pfam</a> | <a href="#">InterPro</a> |                  |
| BHR79_03895        | <a href="#">APH38715</a> | hypothetical protein BHR79_03895 [Methano... | <a href="#">CDD</a> | <a href="#">UniProt</a> | <a href="#">Pfam</a> | <a href="#">InterPro</a> |                  |
| <b>REC-PAS</b>     |                          |                                              |                     |                         |                      |                          |                  |
| BHR79_08490        | <a href="#">APH39513</a> | response regulator receiver protein [Meth... | <a href="#">CDD</a> | <a href="#">UniProt</a> | <a href="#">Pfam</a> | <a href="#">InterPro</a> |                  |
| <b>HTH-REC</b>     |                          |                                              |                     |                         |                      |                          |                  |
| BHR79_09425        | <a href="#">APH39679</a> | response regulator receiver protein [Meth... | <a href="#">CDD</a> | <a href="#">UniProt</a> | <a href="#">Pfam</a> | <a href="#">InterPro</a> |                  |
| <b>Other RRs</b>   |                          |                                              |                     |                         |                      |                          |                  |
| BHR79_01660        | <a href="#">APH38317</a> | response regulator receiver protein [Meth... | <a href="#">CDD</a> | <a href="#">UniProt</a> | <a href="#">Pfam</a> | <a href="#">InterPro</a> | (KaiC-REC)       |
| BHR79_08240        | <a href="#">APH39470</a> | hypothetical protein BHR79_08240 [Methano... | <a href="#">CDD</a> | <a href="#">UniProt</a> | <a href="#">Pfam</a> | <a href="#">InterPro</a> | (REC-PAS-DUF835) |
| BHR79_08465        | <a href="#">APH39508</a> | response regulator [Methanohalophilus hal... | <a href="#">CDD</a> | <a href="#">UniProt</a> | <a href="#">Pfam</a> | <a href="#">InterPro</a> | (REC-MetOD1)     |

### Methanohalophilus mahii DSM 5219

|                     |                          |                                               |                     |                         |                      |                          |  |
|---------------------|--------------------------|-----------------------------------------------|---------------------|-------------------------|----------------------|--------------------------|--|
| <b>HisK, no REC</b> |                          |                                               |                     |                         |                      |                          |  |
| Mmah_0019           | <a href="#">ADE35557</a> | histidine kinase [Methanohalophilus mahii ... | <a href="#">CDD</a> | <a href="#">UniProt</a> | <a href="#">Pfam</a> | <a href="#">InterPro</a> |  |
| Mmah_0110           | <a href="#">ADE35646</a> | PAS/PAC sensor signal transduction histidi... | <a href="#">CDD</a> | <a href="#">UniProt</a> | <a href="#">Pfam</a> | <a href="#">InterPro</a> |  |
| Mmah_0194           | <a href="#">ADE35729</a> | GAF sensor signal transduction histidine k... | <a href="#">CDD</a> | <a href="#">UniProt</a> | <a href="#">Pfam</a> | <a href="#">InterPro</a> |  |
| Mmah_0285           | <a href="#">ADE35817</a> | PAS/PAC sensor signal transduction histidi... | <a href="#">CDD</a> | <a href="#">UniProt</a> | <a href="#">Pfam</a> | <a href="#">InterPro</a> |  |
| Mmah_0343           | <a href="#">ADE35875</a> | PAS/PAC sensor signal transduction histidi... | <a href="#">CDD</a> | <a href="#">UniProt</a> | <a href="#">Pfam</a> | <a href="#">InterPro</a> |  |
| Mmah_0428           | <a href="#">ADE35959</a> | multi-sensor signal transduction histidine... | <a href="#">CDD</a> | <a href="#">UniProt</a> | <a href="#">Pfam</a> | <a href="#">InterPro</a> |  |
| Mmah_0432           | <a href="#">ADE35962</a> | PAS/PAC sensor signal transduction histidi... | <a href="#">CDD</a> | <a href="#">UniProt</a> | <a href="#">Pfam</a> | <a href="#">InterPro</a> |  |
| Mmah_0496           | <a href="#">ADE36024</a> | signal transduction histidine kinase [Meth... | <a href="#">CDD</a> | <a href="#">UniProt</a> | <a href="#">Pfam</a> | <a href="#">InterPro</a> |  |
| Mmah_0593           | <a href="#">ADE36119</a> | multi-sensor signal transduction histidine... | <a href="#">CDD</a> | <a href="#">UniProt</a> | <a href="#">Pfam</a> | <a href="#">InterPro</a> |  |
| Mmah_0821           | <a href="#">ADE36344</a> | integral membrane sensor signal transducti... | <a href="#">CDD</a> | <a href="#">UniProt</a> | <a href="#">Pfam</a> | <a href="#">InterPro</a> |  |
| Mmah_0831           | <a href="#">ADE36354</a> | PAS/PAC sensor signal transduction histidi... | <a href="#">CDD</a> | <a href="#">UniProt</a> | <a href="#">Pfam</a> | <a href="#">InterPro</a> |  |
| Mmah_0908           | <a href="#">ADE36429</a> | PAS/PAC sensor signal transduction histidi... | <a href="#">CDD</a> | <a href="#">UniProt</a> | <a href="#">Pfam</a> | <a href="#">InterPro</a> |  |
| Mmah_0912           | <a href="#">ADE36433</a> | multi-sensor signal transduction histidine... | <a href="#">CDD</a> | <a href="#">UniProt</a> | <a href="#">Pfam</a> | <a href="#">InterPro</a> |  |
| Mmah_0996           | <a href="#">ADE36515</a> | signal transduction histidine kinase [Meth... | <a href="#">CDD</a> | <a href="#">UniProt</a> | <a href="#">Pfam</a> | <a href="#">InterPro</a> |  |
| Mmah_1063           | <a href="#">ADE36574</a> | multi-sensor signal transduction histidine... | <a href="#">CDD</a> | <a href="#">UniProt</a> | <a href="#">Pfam</a> | <a href="#">InterPro</a> |  |
| Mmah_1151           | <a href="#">ADE36657</a> | signal transduction histidine kinase [Meth... | <a href="#">CDD</a> | <a href="#">UniProt</a> | <a href="#">Pfam</a> | <a href="#">InterPro</a> |  |
| Mmah_1249           | <a href="#">ADE36753</a> | PAS/PAC sensor signal transduction histidi... | <a href="#">CDD</a> | <a href="#">UniProt</a> | <a href="#">Pfam</a> | <a href="#">InterPro</a> |  |
| Mmah_1250           | <a href="#">ADE36754</a> | PAS/PAC sensor signal transduction histidi... | <a href="#">CDD</a> | <a href="#">UniProt</a> | <a href="#">Pfam</a> | <a href="#">InterPro</a> |  |
| Mmah_1394           | <a href="#">ADE36893</a> | PAS/PAC sensor signal transduction histidi... | <a href="#">CDD</a> | <a href="#">UniProt</a> | <a href="#">Pfam</a> | <a href="#">InterPro</a> |  |
| Mmah_1503           | <a href="#">ADE36999</a> | multi-sensor signal transduction histidine... | <a href="#">CDD</a> | <a href="#">UniProt</a> | <a href="#">Pfam</a> | <a href="#">InterPro</a> |  |
| Mmah_1558           | <a href="#">ADE37054</a> | multi-sensor signal transduction histidine... | <a href="#">CDD</a> | <a href="#">UniProt</a> | <a href="#">Pfam</a> | <a href="#">InterPro</a> |  |
| Mmah_1998           | <a href="#">ADE37491</a> | PAS/PAC sensor signal transduction histidi... | <a href="#">CDD</a> | <a href="#">UniProt</a> | <a href="#">Pfam</a> | <a href="#">InterPro</a> |  |
| <b>REC only</b>     |                          |                                               |                     |                         |                      |                          |  |
| Mmah_0297           | <a href="#">ADE35829</a> | response regulator receiver protein [Metha... | <a href="#">CDD</a> | <a href="#">UniProt</a> | <a href="#">Pfam</a> | <a href="#">InterPro</a> |  |
| Mmah_0495           | <a href="#">ADE36023</a> | response regulator receiver protein [Metha... | <a href="#">CDD</a> | <a href="#">UniProt</a> | <a href="#">Pfam</a> | <a href="#">InterPro</a> |  |
| Mmah_1130           | <a href="#">ADE36637</a> | response regulator receiver protein [Metha... | <a href="#">CDD</a> | <a href="#">UniProt</a> | <a href="#">Pfam</a> | <a href="#">InterPro</a> |  |
| Mmah_1150           | <a href="#">ADE36656</a> | response regulator receiver protein [Metha... | <a href="#">CDD</a> | <a href="#">UniProt</a> | <a href="#">Pfam</a> | <a href="#">InterPro</a> |  |
| Mmah_1368           | <a href="#">ADE36867</a> | response regulator receiver protein [Metha... | <a href="#">CDD</a> | <a href="#">UniProt</a> | <a href="#">Pfam</a> | <a href="#">InterPro</a> |  |
| Mmah_1501           | <a href="#">ADE36997</a> | response regulator receiver protein [Metha... | <a href="#">CDD</a> | <a href="#">UniProt</a> | <a href="#">Pfam</a> | <a href="#">InterPro</a> |  |
| Mmah_1843           | <a href="#">ADE37338</a> | response regulator receiver protein [Metha... | <a href="#">CDD</a> | <a href="#">UniProt</a> | <a href="#">Pfam</a> | <a href="#">InterPro</a> |  |
| <b>REC-HisK</b>     |                          |                                               |                     |                         |                      |                          |  |
| Mmah_0609           | <a href="#">ADE36134</a> | multi-sensor signal transduction protein [... | <a href="#">CDD</a> | <a href="#">UniProt</a> | <a href="#">Pfam</a> | <a href="#">InterPro</a> |  |
| Mmah_1948           | <a href="#">ADE37443</a> | multi-sensor signal transduction protein [... | <a href="#">CDD</a> | <a href="#">UniProt</a> | <a href="#">Pfam</a> | <a href="#">InterPro</a> |  |
| <b>REC-PAS</b>      |                          |                                               |                     |                         |                      |                          |  |
| Mmah_1016           | <a href="#">ADE36534</a> | putative PAS/PAC sensor protein [Methanoha... | <a href="#">CDD</a> | <a href="#">UniProt</a> | <a href="#">Pfam</a> | <a href="#">InterPro</a> |  |
| <b>WHTH-REC</b>     |                          |                                               |                     |                         |                      |                          |  |

|                   |                          |                                               |                     |                         |                      |                          |              |
|-------------------|--------------------------|-----------------------------------------------|---------------------|-------------------------|----------------------|--------------------------|--------------|
| Mmah_0822         | <a href="#">ADE36345</a> | response regulator receiver protein [Metha... | <a href="#">CDD</a> | <a href="#">UniProt</a> | <a href="#">Pfam</a> | <a href="#">InterPro</a> | (wHTH-REC)   |
| <b>REC-MetOD1</b> |                          |                                               |                     |                         |                      |                          |              |
| Mmah_1021         | <a href="#">ADE36539</a> | response regulator receiver protein [Metha... | <a href="#">CDD</a> | <a href="#">UniProt</a> | <a href="#">Pfam</a> | <a href="#">InterPro</a> | (REC-MetOD1) |
| <b>Other RRs</b>  |                          |                                               |                     |                         |                      |                          |              |
| Mmah_0369         | <a href="#">ADE35901</a> | response regulator receiver protein [Metha... | <a href="#">CDD</a> | <a href="#">UniProt</a> | <a href="#">Pfam</a> | <a href="#">InterPro</a> | (KaiC-REC)   |

### Methanolicinia petrolearia DSM 11571

#### **HisK, no REC**

|           |                          |                                               |                     |                         |                      |                          |  |
|-----------|--------------------------|-----------------------------------------------|---------------------|-------------------------|----------------------|--------------------------|--|
| Mpet_0012 | <a href="#">ADN34793</a> | signal transduction histidine kinase [Meth... | <a href="#">CDD</a> | <a href="#">UniProt</a> | <a href="#">Pfam</a> | <a href="#">InterPro</a> |  |
| Mpet_0033 | <a href="#">ADN34814</a> | multi-sensor signal transduction histidine... | <a href="#">CDD</a> | <a href="#">UniProt</a> | <a href="#">Pfam</a> | <a href="#">InterPro</a> |  |
| Mpet_0077 | <a href="#">ADN34858</a> | signal transduction histidine kinase [Meth... | <a href="#">CDD</a> | <a href="#">UniProt</a> | <a href="#">Pfam</a> | <a href="#">InterPro</a> |  |
| Mpet_0078 | <a href="#">ADN34859</a> | integral membrane sensor signal transducti... | <a href="#">CDD</a> | <a href="#">UniProt</a> | <a href="#">Pfam</a> | <a href="#">InterPro</a> |  |
| Mpet_0115 | <a href="#">ADN34895</a> | signal transduction histidine kinase regul... | <a href="#">CDD</a> | <a href="#">UniProt</a> | <a href="#">Pfam</a> | <a href="#">InterPro</a> |  |
| Mpet_0121 | <a href="#">ADN34901</a> | multi-sensor signal transduction histidine... | <a href="#">CDD</a> | <a href="#">UniProt</a> | <a href="#">Pfam</a> | <a href="#">InterPro</a> |  |
| Mpet_0171 | <a href="#">ADN34949</a> | signal transduction histidine kinase [Meth... | <a href="#">CDD</a> | <a href="#">UniProt</a> | <a href="#">Pfam</a> | <a href="#">InterPro</a> |  |
| Mpet_0181 | <a href="#">ADN34959</a> | signal transduction histidine kinase [Meth... | <a href="#">CDD</a> | <a href="#">UniProt</a> | <a href="#">Pfam</a> | <a href="#">InterPro</a> |  |
| Mpet_0299 | <a href="#">ADN35075</a> | signal transduction histidine kinase [Meth... | <a href="#">CDD</a> | <a href="#">UniProt</a> | <a href="#">Pfam</a> | <a href="#">InterPro</a> |  |
| Mpet_0442 | <a href="#">ADN35216</a> | multi-sensor signal transduction histidine... | <a href="#">CDD</a> | <a href="#">UniProt</a> | <a href="#">Pfam</a> | <a href="#">InterPro</a> |  |
| Mpet_0585 | <a href="#">ADN35359</a> | multi-sensor signal transduction histidine... | <a href="#">CDD</a> | <a href="#">UniProt</a> | <a href="#">Pfam</a> | <a href="#">InterPro</a> |  |
| Mpet_0596 | <a href="#">ADN35370</a> | PAS/PAC sensor signal transduction histidi... | <a href="#">CDD</a> | <a href="#">UniProt</a> | <a href="#">Pfam</a> | <a href="#">InterPro</a> |  |
| Mpet_0645 | <a href="#">ADN35419</a> | multi-sensor signal transduction histidine... | <a href="#">CDD</a> | <a href="#">UniProt</a> | <a href="#">Pfam</a> | <a href="#">InterPro</a> |  |
| Mpet_0678 | <a href="#">ADN35452</a> | multi-sensor signal transduction histidine... | <a href="#">CDD</a> | <a href="#">UniProt</a> | <a href="#">Pfam</a> | <a href="#">InterPro</a> |  |
| Mpet_0829 | <a href="#">ADN35600</a> | integral membrane sensor signal transducti... | <a href="#">CDD</a> | <a href="#">UniProt</a> | <a href="#">Pfam</a> | <a href="#">InterPro</a> |  |
| Mpet_1108 | <a href="#">ADN35874</a> | multi-sensor signal transduction histidine... | <a href="#">CDD</a> | <a href="#">UniProt</a> | <a href="#">Pfam</a> | <a href="#">InterPro</a> |  |
| Mpet_1128 | <a href="#">ADN35894</a> | PAS/PAC sensor signal transduction histidi... | <a href="#">CDD</a> | <a href="#">UniProt</a> | <a href="#">Pfam</a> | <a href="#">InterPro</a> |  |
| Mpet_1138 | <a href="#">ADN35904</a> | multi-sensor signal transduction histidine... | <a href="#">CDD</a> | <a href="#">UniProt</a> | <a href="#">Pfam</a> | <a href="#">InterPro</a> |  |
| Mpet_1153 | <a href="#">ADN35919</a> | signal transduction histidine kinase [Meth... | <a href="#">CDD</a> | <a href="#">UniProt</a> | <a href="#">Pfam</a> | <a href="#">InterPro</a> |  |
| Mpet_1205 | <a href="#">ADN35966</a> | histidine kinase [Methanolicinia petrolear... | <a href="#">CDD</a> | <a href="#">UniProt</a> | <a href="#">Pfam</a> | <a href="#">InterPro</a> |  |
| Mpet_1492 | <a href="#">ADN36250</a> | PAS/PAC sensor signal transduction histidi... | <a href="#">CDD</a> | <a href="#">UniProt</a> | <a href="#">Pfam</a> | <a href="#">InterPro</a> |  |
| Mpet_1802 | <a href="#">ADN36555</a> | multi-sensor signal transduction histidine... | <a href="#">CDD</a> | <a href="#">UniProt</a> | <a href="#">Pfam</a> | <a href="#">InterPro</a> |  |
| Mpet_2066 | <a href="#">ADN36814</a> | CheA signal transduction histidine kinase ... | <a href="#">CDD</a> | <a href="#">UniProt</a> | <a href="#">Pfam</a> | <a href="#">InterPro</a> |  |
| Mpet_2523 | <a href="#">ADN37267</a> | PAS/PAC sensor signal transduction histidi... | <a href="#">CDD</a> | <a href="#">UniProt</a> | <a href="#">Pfam</a> | <a href="#">InterPro</a> |  |
| Mpet_2600 | <a href="#">ADN37343</a> | integral membrane sensor signal transducti... | <a href="#">CDD</a> | <a href="#">UniProt</a> | <a href="#">Pfam</a> | <a href="#">InterPro</a> |  |
| Mpet_2671 | <a href="#">ADN37414</a> | integral membrane sensor signal transducti... | <a href="#">CDD</a> | <a href="#">UniProt</a> | <a href="#">Pfam</a> | <a href="#">InterPro</a> |  |
| Mpet_2707 | <a href="#">ADN37450</a> | signal transduction histidine kinase [Meth... | <a href="#">CDD</a> | <a href="#">UniProt</a> | <a href="#">Pfam</a> | <a href="#">InterPro</a> |  |
| Mpet_2735 | <a href="#">ADN37478</a> | signal transduction histidine kinase [Meth... | <a href="#">CDD</a> | <a href="#">UniProt</a> | <a href="#">Pfam</a> | <a href="#">InterPro</a> |  |
| Mpet_2799 | <a href="#">ADN37542</a> | putative PAS/PAC sensor protein [Methanola... | <a href="#">CDD</a> | <a href="#">UniProt</a> | <a href="#">Pfam</a> | <a href="#">InterPro</a> |  |
| Mpet_2810 | <a href="#">ADN37553</a> | histidine kinase [Methanolicinia petrolear... | <a href="#">CDD</a> | <a href="#">UniProt</a> | <a href="#">Pfam</a> | <a href="#">InterPro</a> |  |
| Mpet_2819 | <a href="#">ADN37561</a> | multi-sensor signal transduction histidine... | <a href="#">CDD</a> | <a href="#">UniProt</a> | <a href="#">Pfam</a> | <a href="#">InterPro</a> |  |

#### **Hybrid HisK**

|           |                          |                                               |                     |                         |                      |                          |  |
|-----------|--------------------------|-----------------------------------------------|---------------------|-------------------------|----------------------|--------------------------|--|
| Mpet_0061 | <a href="#">ADN34842</a> | multi-sensor hybrid histidine kinase [Meth... | <a href="#">CDD</a> | <a href="#">UniProt</a> | <a href="#">Pfam</a> | <a href="#">InterPro</a> |  |
|-----------|--------------------------|-----------------------------------------------|---------------------|-------------------------|----------------------|--------------------------|--|

#### **HisKA, no HATPase**

|           |                          |                                               |                     |                         |                      |                          |  |
|-----------|--------------------------|-----------------------------------------------|---------------------|-------------------------|----------------------|--------------------------|--|
| Mpet_1496 | <a href="#">ADN36253</a> | putative PAS/PAC sensor protein [Methanola... | <a href="#">CDD</a> | <a href="#">UniProt</a> | <a href="#">Pfam</a> | <a href="#">InterPro</a> |  |
| Mpet_1966 | <a href="#">ADN36716</a> | putative methyl-accepting chemotaxis senso... | <a href="#">CDD</a> | <a href="#">UniProt</a> | <a href="#">Pfam</a> | <a href="#">InterPro</a> |  |
| Mpet_1967 | <a href="#">ADN36717</a> | putative sensor with HAMP domain [Methanol... | <a href="#">CDD</a> | <a href="#">UniProt</a> | <a href="#">Pfam</a> | <a href="#">InterPro</a> |  |
| Mpet_1968 | <a href="#">ADN36718</a> | putative methyl-accepting chemotaxis senso... | <a href="#">CDD</a> | <a href="#">UniProt</a> | <a href="#">Pfam</a> | <a href="#">InterPro</a> |  |
| Mpet_2120 | <a href="#">ADN36868</a> | putative PAS/PAC sensor protein [Methanola... | <a href="#">CDD</a> | <a href="#">UniProt</a> | <a href="#">Pfam</a> | <a href="#">InterPro</a> |  |
| Mpet_2690 | <a href="#">ADN37433</a> | putative PAS/PAC sensor protein [Methanola... | <a href="#">CDD</a> | <a href="#">UniProt</a> | <a href="#">Pfam</a> | <a href="#">InterPro</a> |  |
| Mpet_2746 | <a href="#">ADN37489</a> | putative PAS/PAC sensor protein [Methanola... | <a href="#">CDD</a> | <a href="#">UniProt</a> | <a href="#">Pfam</a> | <a href="#">InterPro</a> |  |

#### **REC only**

|           |                          |                                               |                     |                         |                      |                          |  |
|-----------|--------------------------|-----------------------------------------------|---------------------|-------------------------|----------------------|--------------------------|--|
| Mpet_0013 | <a href="#">ADN34794</a> | response regulator receiver protein [Metha... | <a href="#">CDD</a> | <a href="#">UniProt</a> | <a href="#">Pfam</a> | <a href="#">InterPro</a> |  |
| Mpet_0182 | <a href="#">ADN34960</a> | response regulator receiver protein [Metha... | <a href="#">CDD</a> | <a href="#">UniProt</a> | <a href="#">Pfam</a> | <a href="#">InterPro</a> |  |
| Mpet_0586 | <a href="#">ADN35360</a> | response regulator receiver protein [Metha... | <a href="#">CDD</a> | <a href="#">UniProt</a> | <a href="#">Pfam</a> | <a href="#">InterPro</a> |  |
| Mpet_0594 | <a href="#">ADN35368</a> | response regulator receiver protein [Metha... | <a href="#">CDD</a> | <a href="#">UniProt</a> | <a href="#">Pfam</a> | <a href="#">InterPro</a> |  |
| Mpet_1207 | <a href="#">ADN35968</a> | response regulator receiver protein [Metha... | <a href="#">CDD</a> | <a href="#">UniProt</a> | <a href="#">Pfam</a> | <a href="#">InterPro</a> |  |
| Mpet_2064 | <a href="#">ADN36812</a> | response regulator receiver protein [Metha... | <a href="#">CDD</a> | <a href="#">UniProt</a> | <a href="#">Pfam</a> | <a href="#">InterPro</a> |  |
| Mpet_2121 | <a href="#">ADN36869</a> | response regulator receiver protein [Metha... | <a href="#">CDD</a> | <a href="#">UniProt</a> | <a href="#">Pfam</a> | <a href="#">InterPro</a> |  |

#### **REC-HisK**

|           |                          |                                               |                     |                         |                      |                          |  |
|-----------|--------------------------|-----------------------------------------------|---------------------|-------------------------|----------------------|--------------------------|--|
| Mpet_0180 | <a href="#">ADN34958</a> | signal transduction histidine kinase [Meth... | <a href="#">CDD</a> | <a href="#">UniProt</a> | <a href="#">Pfam</a> | <a href="#">InterPro</a> |  |
| Mpet_0288 | <a href="#">ADN35065</a> | putative PAS/PAC sensor protein [Methanola... | <a href="#">CDD</a> | <a href="#">UniProt</a> | <a href="#">Pfam</a> | <a href="#">InterPro</a> |  |
| Mpet_0399 | <a href="#">ADN35173</a> | multi-sensor signal transduction histidine... | <a href="#">CDD</a> | <a href="#">UniProt</a> | <a href="#">Pfam</a> | <a href="#">InterPro</a> |  |
| Mpet_0602 | <a href="#">ADN35376</a> | multi-sensor signal transduction histidine... | <a href="#">CDD</a> | <a href="#">UniProt</a> | <a href="#">Pfam</a> | <a href="#">InterPro</a> |  |
| Mpet_1059 | <a href="#">ADN35826</a> | signal transduction histidine kinase [Meth... | <a href="#">CDD</a> | <a href="#">UniProt</a> | <a href="#">Pfam</a> | <a href="#">InterPro</a> |  |
| Mpet_1150 | <a href="#">ADN35916</a> | multi-sensor signal transduction histidine... | <a href="#">CDD</a> | <a href="#">UniProt</a> | <a href="#">Pfam</a> | <a href="#">InterPro</a> |  |
| Mpet_1963 | <a href="#">ADN36713</a> | multi-sensor signal transduction histidine... | <a href="#">CDD</a> | <a href="#">UniProt</a> | <a href="#">Pfam</a> | <a href="#">InterPro</a> |  |
| Mpet_2338 | <a href="#">ADN37085</a> | multi-sensor signal transduction histidine... | <a href="#">CDD</a> | <a href="#">UniProt</a> | <a href="#">Pfam</a> | <a href="#">InterPro</a> |  |
| Mpet_2562 | <a href="#">ADN37306</a> | multi-sensor signal transduction histidine... | <a href="#">CDD</a> | <a href="#">UniProt</a> | <a href="#">Pfam</a> | <a href="#">InterPro</a> |  |
| Mpet_2802 | <a href="#">ADN37545</a> | multi-sensor signal transduction histidine... | <a href="#">CDD</a> | <a href="#">UniProt</a> | <a href="#">Pfam</a> | <a href="#">InterPro</a> |  |

#### **REC-CheB**

|           |                          |                                               |                     |                         |                      |                          |  |
|-----------|--------------------------|-----------------------------------------------|---------------------|-------------------------|----------------------|--------------------------|--|
| Mpet_2065 | <a href="#">ADN36813</a> | response regulator receiver modulated CheB... | <a href="#">CDD</a> | <a href="#">UniProt</a> | <a href="#">Pfam</a> | <a href="#">InterPro</a> |  |
|-----------|--------------------------|-----------------------------------------------|---------------------|-------------------------|----------------------|--------------------------|--|

#### **REC-PAS**

|           |                          |                                               |                     |                         |                      |                          |  |
|-----------|--------------------------|-----------------------------------------------|---------------------|-------------------------|----------------------|--------------------------|--|
| Mpet_0059 | <a href="#">ADN34840</a> | putative PAS/PAC sensor protein [Methanola... | <a href="#">CDD</a> | <a href="#">UniProt</a> | <a href="#">Pfam</a> | <a href="#">InterPro</a> |  |
| Mpet_2605 | <a href="#">ADN37348</a> | putative PAS/PAC sensor protein [Methanola... | <a href="#">CDD</a> | <a href="#">UniProt</a> | <a href="#">Pfam</a> | <a href="#">InterPro</a> |  |
| Mpet_0266 | <a href="#">ADN35044</a> | response regulator receiver protein [Metha... | <a href="#">CDD</a> | <a href="#">UniProt</a> | <a href="#">Pfam</a> | <a href="#">InterPro</a> |  |
| Mpet_2524 | <a href="#">ADN37268</a> | putative PAS/PAC sensor protein [Methanola... | <a href="#">CDD</a> | <a href="#">UniProt</a> | <a href="#">Pfam</a> | <a href="#">InterPro</a> |  |
| Mpet_2767 | <a href="#">ADN37510</a> | putative PAS/PAC sensor protein [Methanola... | <a href="#">CDD</a> | <a href="#">UniProt</a> | <a href="#">Pfam</a> | <a href="#">InterPro</a> |  |
| Mpet_2772 | <a href="#">ADN37515</a> | response regulator receiver protein [Metha... | <a href="#">CDD</a> | <a href="#">UniProt</a> | <a href="#">Pfam</a> | <a href="#">InterPro</a> |  |

#### **Other RRs**

|                         |                          |                                               |                     |                         |                      |                          |                   |
|-------------------------|--------------------------|-----------------------------------------------|---------------------|-------------------------|----------------------|--------------------------|-------------------|
| Mpet_0172<br>HisKA)     | <a href="#">ADN34950</a> | putative PAS/PAC sensor protein [Methanola... | <a href="#">CDD</a> | <a href="#">UniProt</a> | <a href="#">Pfam</a> | <a href="#">InterPro</a> | (REC-PAS-PAS-     |
| Mpet_0183               | <a href="#">ADN34961</a> | response regulator receiver protein [Metha... | <a href="#">CDD</a> | <a href="#">UniProt</a> | <a href="#">Pfam</a> | <a href="#">InterPro</a> | (REC-PAS-HisKA)   |
| Mpet_1022<br>HisKA)     | <a href="#">ADN35789</a> | putative PAS/PAC sensor protein [Methanola... | <a href="#">CDD</a> | <a href="#">UniProt</a> | <a href="#">Pfam</a> | <a href="#">InterPro</a> | (REC-PAS-PAS-     |
| Mpet_1107<br>PAS-HisKA) | <a href="#">ADN35873</a> | putative PAS/PAC sensor protein [Methanola... | <a href="#">CDD</a> | <a href="#">UniProt</a> | <a href="#">Pfam</a> | <a href="#">InterPro</a> | (REC-PAS-PAS-GAF- |
| Mpet_1172<br>PAS-HisKA) | <a href="#">ADN35935</a> | putative PAS/PAC sensor protein [Methanola... | <a href="#">CDD</a> | <a href="#">UniProt</a> | <a href="#">Pfam</a> | <a href="#">InterPro</a> | (REC-PAS-PAS-GAF- |
| Mpet_1739               | <a href="#">ADN36492</a> | response regulator receiver protein [Metha... | <a href="#">CDD</a> | <a href="#">UniProt</a> | <a href="#">Pfam</a> | <a href="#">InterPro</a> | (REC-MetOD2)      |

### Methanobolus psychrophilus R15

#### **HisK, no REC**

|           |                          |                                               |                     |                         |                      |                          |  |
|-----------|--------------------------|-----------------------------------------------|---------------------|-------------------------|----------------------|--------------------------|--|
| Mpsy_0054 | <a href="#">AFV22267</a> | multisensor signal transduction histidine ... | <a href="#">CDD</a> | <a href="#">UniProt</a> | <a href="#">Pfam</a> | <a href="#">InterPro</a> |  |
| Mpsy_0073 | <a href="#">AFV22286</a> | multisensor signal transduction histidine ... | <a href="#">CDD</a> | <a href="#">UniProt</a> | <a href="#">Pfam</a> | <a href="#">InterPro</a> |  |
| Mpsy_0208 | <a href="#">AFV22421</a> | multi-sensor hybrid histidine kinase [Meth... | <a href="#">CDD</a> | <a href="#">UniProt</a> | <a href="#">Pfam</a> | <a href="#">InterPro</a> |  |
| Mpsy_0241 | <a href="#">AFV22454</a> | two-component hybrid sensor and regulator ... | <a href="#">CDD</a> | <a href="#">UniProt</a> | <a href="#">Pfam</a> | <a href="#">InterPro</a> |  |
| Mpsy_0354 | <a href="#">AFV22565</a> | PAS/PAC sensor signal transduction histidi... | <a href="#">CDD</a> | <a href="#">UniProt</a> | <a href="#">Pfam</a> | <a href="#">InterPro</a> |  |
| Mpsy_0363 | <a href="#">AFV22574</a> | PAS/PAC sensor signal transduction histidi... | <a href="#">CDD</a> | <a href="#">UniProt</a> | <a href="#">Pfam</a> | <a href="#">InterPro</a> |  |
| Mpsy_0517 | <a href="#">AFV22728</a> | multi-sensor signal transduction histidine... | <a href="#">CDD</a> | <a href="#">UniProt</a> | <a href="#">Pfam</a> | <a href="#">InterPro</a> |  |
| Mpsy_0812 | <a href="#">AFV23021</a> | signal transduction histidine kinase [Meth... | <a href="#">CDD</a> | <a href="#">UniProt</a> | <a href="#">Pfam</a> | <a href="#">InterPro</a> |  |
| Mpsy_0825 | <a href="#">AFV23034</a> | sensory transduction histidine kinase [Met... | <a href="#">CDD</a> | <a href="#">UniProt</a> | <a href="#">Pfam</a> | <a href="#">InterPro</a> |  |
| Mpsy_0872 | <a href="#">AFV23081</a> | PAS/PAC sensor signal transduction histidi... | <a href="#">CDD</a> | <a href="#">UniProt</a> | <a href="#">Pfam</a> | <a href="#">InterPro</a> |  |
| Mpsy_1040 | <a href="#">AFV23249</a> | hypothetical protein Mpsy_1040 [Methanolob... | <a href="#">CDD</a> | <a href="#">UniProt</a> | <a href="#">Pfam</a> | <a href="#">InterPro</a> |  |
| Mpsy_1174 | <a href="#">AFV23382</a> | PAS/PAC sensor signal transduction histidi... | <a href="#">CDD</a> | <a href="#">UniProt</a> | <a href="#">Pfam</a> | <a href="#">InterPro</a> |  |
| Mpsy_1192 | <a href="#">AFV23400</a> | PAS/PAC sensor signal transduction histidi... | <a href="#">CDD</a> | <a href="#">UniProt</a> | <a href="#">Pfam</a> | <a href="#">InterPro</a> |  |
| Mpsy_1204 | <a href="#">AFV23412</a> | PAS/PAC sensor signal transduction histidi... | <a href="#">CDD</a> | <a href="#">UniProt</a> | <a href="#">Pfam</a> | <a href="#">InterPro</a> |  |
| Mpsy_1239 | <a href="#">AFV23447</a> | PAS/PAC sensor signal transduction histidi... | <a href="#">CDD</a> | <a href="#">UniProt</a> | <a href="#">Pfam</a> | <a href="#">InterPro</a> |  |
| Mpsy_1251 | <a href="#">AFV23459</a> | integral membrane sensor signal transducti... | <a href="#">CDD</a> | <a href="#">UniProt</a> | <a href="#">Pfam</a> | <a href="#">InterPro</a> |  |
| Mpsy_1297 | <a href="#">AFV23505</a> | PAS/PAC sensor signal transduction histidi... | <a href="#">CDD</a> | <a href="#">UniProt</a> | <a href="#">Pfam</a> | <a href="#">InterPro</a> |  |
| Mpsy_1547 | <a href="#">AFV23754</a> | multi-sensor signal transduction histidine... | <a href="#">CDD</a> | <a href="#">UniProt</a> | <a href="#">Pfam</a> | <a href="#">InterPro</a> |  |
| Mpsy_1696 | <a href="#">AFV23903</a> | signal transduction histidine kinase [Meth... | <a href="#">CDD</a> | <a href="#">UniProt</a> | <a href="#">Pfam</a> | <a href="#">InterPro</a> |  |
| Mpsy_1718 | <a href="#">AFV23925</a> | sensory transduction histidine kinase [Met... | <a href="#">CDD</a> | <a href="#">UniProt</a> | <a href="#">Pfam</a> | <a href="#">InterPro</a> |  |
| Mpsy_1737 | <a href="#">AFV23944</a> | PAS/PAC sensor signal transduction histidi... | <a href="#">CDD</a> | <a href="#">UniProt</a> | <a href="#">Pfam</a> | <a href="#">InterPro</a> |  |
| Mpsy_2042 | <a href="#">AFV24248</a> | multi-sensor signal transduction histidine... | <a href="#">CDD</a> | <a href="#">UniProt</a> | <a href="#">Pfam</a> | <a href="#">InterPro</a> |  |
| Mpsy_2220 | <a href="#">AFV24424</a> | PAS/PAC sensor signal transduction histidi... | <a href="#">CDD</a> | <a href="#">UniProt</a> | <a href="#">Pfam</a> | <a href="#">InterPro</a> |  |
| Mpsy_2256 | <a href="#">AFV24460</a> | sensory transduction histidine kinase [Met... | <a href="#">CDD</a> | <a href="#">UniProt</a> | <a href="#">Pfam</a> | <a href="#">InterPro</a> |  |
| Mpsy_2598 | <a href="#">AFV24801</a> | signal transduction histidine kinase CheA ... | <a href="#">CDD</a> | <a href="#">UniProt</a> | <a href="#">Pfam</a> | <a href="#">InterPro</a> |  |
| Mpsy_2638 | <a href="#">AFV24841</a> | sensory transduction histidine kinase [Met... | <a href="#">CDD</a> | <a href="#">UniProt</a> | <a href="#">Pfam</a> | <a href="#">InterPro</a> |  |
| Mpsy_2783 | <a href="#">AFV24984</a> | PAS/PAC sensor signal transduction histidi... | <a href="#">CDD</a> | <a href="#">UniProt</a> | <a href="#">Pfam</a> | <a href="#">InterPro</a> |  |
| Mpsy_2808 | <a href="#">AFV25009</a> | PAS/PAC sensor signal transduction histidi... | <a href="#">CDD</a> | <a href="#">UniProt</a> | <a href="#">Pfam</a> | <a href="#">InterPro</a> |  |
| Mpsy_2981 | <a href="#">AFV25180</a> | putative Histidine kinase [Methanobolus ps... | <a href="#">CDD</a> | <a href="#">UniProt</a> | <a href="#">Pfam</a> | <a href="#">InterPro</a> |  |
| Mpsy_3073 | <a href="#">AFV25272</a> | PAS/PAC sensor signal transduction histidi... | <a href="#">CDD</a> | <a href="#">UniProt</a> | <a href="#">Pfam</a> | <a href="#">InterPro</a> |  |

#### **Hybrid HisK**

|           |                          |                                               |                     |                         |                      |                          |  |
|-----------|--------------------------|-----------------------------------------------|---------------------|-------------------------|----------------------|--------------------------|--|
| Mpsy_0031 | <a href="#">AFV22244</a> | PAS domain protein [Methanobolus psychroph... | <a href="#">CDD</a> | <a href="#">UniProt</a> | <a href="#">Pfam</a> | <a href="#">InterPro</a> |  |
| Mpsy_0087 | <a href="#">AFV22300</a> | multi-sensor hybrid histidine kinase [Meth... | <a href="#">CDD</a> | <a href="#">UniProt</a> | <a href="#">Pfam</a> | <a href="#">InterPro</a> |  |
| Mpsy_1288 | <a href="#">AFV23496</a> | two component system histidine kinase [Met... | <a href="#">CDD</a> | <a href="#">UniProt</a> | <a href="#">Pfam</a> | <a href="#">InterPro</a> |  |
| Mpsy_2824 | <a href="#">AFV25023</a> | multi-sensor hybrid histidine kinase [Meth... | <a href="#">CDD</a> | <a href="#">UniProt</a> | <a href="#">Pfam</a> | <a href="#">InterPro</a> |  |
| Mpsy_2980 | <a href="#">AFV25179</a> | multi-sensor hybrid histidine kinase [Meth... | <a href="#">CDD</a> | <a href="#">UniProt</a> | <a href="#">Pfam</a> | <a href="#">InterPro</a> |  |
| Mpsy_3068 | <a href="#">AFV25267</a> | PAS domain protein [Methanobolus psychroph... | <a href="#">CDD</a> | <a href="#">UniProt</a> | <a href="#">Pfam</a> | <a href="#">InterPro</a> |  |

#### **REC only**

|           |                          |                                               |                     |                         |                      |                          |  |
|-----------|--------------------------|-----------------------------------------------|---------------------|-------------------------|----------------------|--------------------------|--|
| Mpsy_0893 | <a href="#">AFV23102</a> | response regulator receiver protein [Metha... | <a href="#">CDD</a> | <a href="#">UniProt</a> | <a href="#">Pfam</a> | <a href="#">InterPro</a> |  |
| Mpsy_1286 | <a href="#">AFV23494</a> | response regulator receiver protein [Metha... | <a href="#">CDD</a> | <a href="#">UniProt</a> | <a href="#">Pfam</a> | <a href="#">InterPro</a> |  |
| Mpsy_1697 | <a href="#">AFV23904</a> | response regulator receiver protein [Metha... | <a href="#">CDD</a> | <a href="#">UniProt</a> | <a href="#">Pfam</a> | <a href="#">InterPro</a> |  |
| Mpsy_1719 | <a href="#">AFV23926</a> | response regulator receiver [Methanobolus ... | <a href="#">CDD</a> | <a href="#">UniProt</a> | <a href="#">Pfam</a> | <a href="#">InterPro</a> |  |
| Mpsy_2043 | <a href="#">AFV24249</a> | response regulator receiver protein [Metha... | <a href="#">CDD</a> | <a href="#">UniProt</a> | <a href="#">Pfam</a> | <a href="#">InterPro</a> |  |
| Mpsy_2344 | <a href="#">AFV24548</a> | response regulator receiver [Methanobolus ... | <a href="#">CDD</a> | <a href="#">UniProt</a> | <a href="#">Pfam</a> | <a href="#">InterPro</a> |  |
| Mpsy_2600 | <a href="#">AFV24803</a> | response regulator receiver protein [Metha... | <a href="#">CDD</a> | <a href="#">UniProt</a> | <a href="#">Pfam</a> | <a href="#">InterPro</a> |  |
| Mpsy_2847 | <a href="#">AFV25046</a> | response regulator receiver protein [Metha... | <a href="#">CDD</a> | <a href="#">UniProt</a> | <a href="#">Pfam</a> | <a href="#">InterPro</a> |  |

#### **REC-HisK**

|           |                          |                                               |                     |                         |                      |                          |  |
|-----------|--------------------------|-----------------------------------------------|---------------------|-------------------------|----------------------|--------------------------|--|
| Mpsy_1340 | <a href="#">AFV23548</a> | multisensor signal transduction histidine ... | <a href="#">CDD</a> | <a href="#">UniProt</a> | <a href="#">Pfam</a> | <a href="#">InterPro</a> |  |
| Mpsy_1428 | <a href="#">AFV23636</a> | PAS/PAC sensor signal transduction histidi... | <a href="#">CDD</a> | <a href="#">UniProt</a> | <a href="#">Pfam</a> | <a href="#">InterPro</a> |  |
| Mpsy_2044 | <a href="#">AFV24250</a> | PAS/PAC sensor signal transduction histidi... | <a href="#">CDD</a> | <a href="#">UniProt</a> | <a href="#">Pfam</a> | <a href="#">InterPro</a> |  |
| Mpsy_2480 | <a href="#">AFV24684</a> | PAS/PAC sensor signal transduction histidi... | <a href="#">CDD</a> | <a href="#">UniProt</a> | <a href="#">Pfam</a> | <a href="#">InterPro</a> |  |
| Mpsy_3013 | <a href="#">AFV25212</a> | multisensor signal transduction histidine ... | <a href="#">CDD</a> | <a href="#">UniProt</a> | <a href="#">Pfam</a> | <a href="#">InterPro</a> |  |

#### **REC-CheB**

|           |                          |                                               |                     |                         |                      |                          |  |
|-----------|--------------------------|-----------------------------------------------|---------------------|-------------------------|----------------------|--------------------------|--|
| Mpsy_2599 | <a href="#">AFV24802</a> | chemotaxis response regulator protein-glut... | <a href="#">CDD</a> | <a href="#">UniProt</a> | <a href="#">Pfam</a> | <a href="#">InterPro</a> |  |
|-----------|--------------------------|-----------------------------------------------|---------------------|-------------------------|----------------------|--------------------------|--|

#### **REC-PAS**

|           |                          |                                               |                     |                         |                      |                          |  |
|-----------|--------------------------|-----------------------------------------------|---------------------|-------------------------|----------------------|--------------------------|--|
| Mpsy_0813 | <a href="#">AFV23022</a> | putative signal transduction protein [Meth... | <a href="#">CDD</a> | <a href="#">UniProt</a> | <a href="#">Pfam</a> | <a href="#">InterPro</a> |  |
| Mpsy_2721 | <a href="#">AFV24922</a> | multisensor signal transduction histidine ... | <a href="#">CDD</a> | <a href="#">UniProt</a> | <a href="#">Pfam</a> | <a href="#">InterPro</a> |  |

#### **HTH-REC**

|           |                          |                                               |                     |                         |                      |                          |  |
|-----------|--------------------------|-----------------------------------------------|---------------------|-------------------------|----------------------|--------------------------|--|
| Mpsy_1252 | <a href="#">AFV23460</a> | response regulator receiver protein [Metha... | <a href="#">CDD</a> | <a href="#">UniProt</a> | <a href="#">Pfam</a> | <a href="#">InterPro</a> |  |
|-----------|--------------------------|-----------------------------------------------|---------------------|-------------------------|----------------------|--------------------------|--|

#### **REC-MetOD1**

|           |                          |                                               |                     |                         |                      |                          |              |
|-----------|--------------------------|-----------------------------------------------|---------------------|-------------------------|----------------------|--------------------------|--------------|
| Mpsy_2767 | <a href="#">AFV24968</a> | response regulator receiver [Methanobolus ... | <a href="#">CDD</a> | <a href="#">UniProt</a> | <a href="#">Pfam</a> | <a href="#">InterPro</a> | (REC-MetOD1) |
|-----------|--------------------------|-----------------------------------------------|---------------------|-------------------------|----------------------|--------------------------|--------------|

#### **Other RRs**

|                      |                          |                                               |                     |                         |                      |                          |               |
|----------------------|--------------------------|-----------------------------------------------|---------------------|-------------------------|----------------------|--------------------------|---------------|
| Mpsy_2343            | <a href="#">AFV24547</a> | response regulator receiver protein [Metha... | <a href="#">CDD</a> | <a href="#">UniProt</a> | <a href="#">Pfam</a> | <a href="#">InterPro</a> | (KaiC-REC)    |
| Mpsy_2611<br>DUF835) | <a href="#">AFV24814</a> | hypothetical protein Mpsy_2611 [Methanolob... | <a href="#">CDD</a> | <a href="#">UniProt</a> | <a href="#">Pfam</a> | <a href="#">InterPro</a> | (REC-PAS-PAS- |

---

**Methanomethylovorans hollandica DSM 15978****HisK, no REC**

|            |                          |                                               |                     |                         |                      |                          |
|------------|--------------------------|-----------------------------------------------|---------------------|-------------------------|----------------------|--------------------------|
| Metho_0017 | <a href="#">AGB48315</a> | PAS domain S-box [Methanomethylovorans hol... | <a href="#">CDD</a> | <a href="#">UniProt</a> | <a href="#">Pfam</a> | <a href="#">InterPro</a> |
| Metho_0348 | <a href="#">AGB48621</a> | PAS domain S-box [Methanomethylovorans hol... | <a href="#">CDD</a> | <a href="#">UniProt</a> | <a href="#">Pfam</a> | <a href="#">InterPro</a> |
| Metho_0372 | <a href="#">AGB48645</a> | PAS domain S-box [Methanomethylovorans hol... | <a href="#">CDD</a> | <a href="#">UniProt</a> | <a href="#">Pfam</a> | <a href="#">InterPro</a> |
| Metho_0391 | <a href="#">AGB48661</a> | histidine kinase [Methanomethylovorans hol... | <a href="#">CDD</a> | <a href="#">UniProt</a> | <a href="#">Pfam</a> | <a href="#">InterPro</a> |
| Metho_1007 | <a href="#">AGB49246</a> | PAS domain S-box [Methanomethylovorans hol... | <a href="#">CDD</a> | <a href="#">UniProt</a> | <a href="#">Pfam</a> | <a href="#">InterPro</a> |
| Metho_1008 | <a href="#">AGB49247</a> | PAS domain S-box [Methanomethylovorans hol... | <a href="#">CDD</a> | <a href="#">UniProt</a> | <a href="#">Pfam</a> | <a href="#">InterPro</a> |
| Metho_1028 | <a href="#">AGB49266</a> | signal transduction histidine kinase [Meth... | <a href="#">CDD</a> | <a href="#">UniProt</a> | <a href="#">Pfam</a> | <a href="#">InterPro</a> |
| Metho_1103 | <a href="#">AGB49338</a> | PAS domain S-box [Methanomethylovorans hol... | <a href="#">CDD</a> | <a href="#">UniProt</a> | <a href="#">Pfam</a> | <a href="#">InterPro</a> |
| Metho_1265 | <a href="#">AGB49493</a> | PAS domain S-box [Methanomethylovorans hol... | <a href="#">CDD</a> | <a href="#">UniProt</a> | <a href="#">Pfam</a> | <a href="#">InterPro</a> |
| Metho_1298 | <a href="#">AGB49521</a> | PAS domain S-box [Methanomethylovorans hol... | <a href="#">CDD</a> | <a href="#">UniProt</a> | <a href="#">Pfam</a> | <a href="#">InterPro</a> |
| Metho_1431 | <a href="#">AGB49638</a> | chemotaxis protein histidine kinase-like p... | <a href="#">CDD</a> | <a href="#">UniProt</a> | <a href="#">Pfam</a> | <a href="#">InterPro</a> |

**REC only**

|            |                          |                                               |                     |                         |                      |                          |
|------------|--------------------------|-----------------------------------------------|---------------------|-------------------------|----------------------|--------------------------|
| Metho_0018 | <a href="#">AGB48316</a> | CheY-like receiver domain-containing prote... | <a href="#">CDD</a> | <a href="#">UniProt</a> | <a href="#">Pfam</a> | <a href="#">InterPro</a> |
| Metho_1029 | <a href="#">AGB49267</a> | CheY-like receiver domain-containing prote... | <a href="#">CDD</a> | <a href="#">UniProt</a> | <a href="#">Pfam</a> | <a href="#">InterPro</a> |
| Metho_1347 | <a href="#">AGB49565</a> | response regulator containing a CheY-like ... | <a href="#">CDD</a> | <a href="#">UniProt</a> | <a href="#">Pfam</a> | <a href="#">InterPro</a> |
| Metho_1429 | <a href="#">AGB49636</a> | chemotaxis response regulator containing a... | <a href="#">CDD</a> | <a href="#">UniProt</a> | <a href="#">Pfam</a> | <a href="#">InterPro</a> |

**REC-HisK**

|            |                          |                                               |                     |                         |                      |                          |
|------------|--------------------------|-----------------------------------------------|---------------------|-------------------------|----------------------|--------------------------|
| Metho_0316 | <a href="#">AGB48590</a> | PAS domain S-box [Methanomethylovorans hol... | <a href="#">CDD</a> | <a href="#">UniProt</a> | <a href="#">Pfam</a> | <a href="#">InterPro</a> |
| Metho_1090 | <a href="#">AGB49325</a> | PAS domain S-box [Methanomethylovorans hol... | <a href="#">CDD</a> | <a href="#">UniProt</a> | <a href="#">Pfam</a> | <a href="#">InterPro</a> |

**REC-CheB**

|            |                          |                                               |                     |                         |                      |                          |
|------------|--------------------------|-----------------------------------------------|---------------------|-------------------------|----------------------|--------------------------|
| Metho_1430 | <a href="#">AGB49637</a> | chemotaxis response regulator protein-glut... | <a href="#">CDD</a> | <a href="#">UniProt</a> | <a href="#">Pfam</a> | <a href="#">InterPro</a> |
|------------|--------------------------|-----------------------------------------------|---------------------|-------------------------|----------------------|--------------------------|

**REC-PAS**

|            |                          |                                               |                     |                         |                      |                          |
|------------|--------------------------|-----------------------------------------------|---------------------|-------------------------|----------------------|--------------------------|
| Metho_1877 | <a href="#">AGB50054</a> | PAS domain S-box [Methanomethylovorans hol... | <a href="#">CDD</a> | <a href="#">UniProt</a> | <a href="#">Pfam</a> | <a href="#">InterPro</a> |
|------------|--------------------------|-----------------------------------------------|---------------------|-------------------------|----------------------|--------------------------|

**Other RRs**

|            |                          |                                               |                     |                         |                      |                                     |
|------------|--------------------------|-----------------------------------------------|---------------------|-------------------------|----------------------|-------------------------------------|
| Metho_0471 | <a href="#">AGB48738</a> | response regulator with CheY-like receiver... | <a href="#">CDD</a> | <a href="#">UniProt</a> | <a href="#">Pfam</a> | <a href="#">InterPro</a> (KaiC-REC) |
|------------|--------------------------|-----------------------------------------------|---------------------|-------------------------|----------------------|-------------------------------------|

---

**Methanoplanus limicola DSM 2279****HisK, no REC**

|             |                          |                                              |                     |                         |                      |                          |
|-------------|--------------------------|----------------------------------------------|---------------------|-------------------------|----------------------|--------------------------|
| Metlim_0040 | <a href="#">EHQ34193</a> | PAS/PAC sensor signal transduction histid... | <a href="#">CDD</a> | <a href="#">UniProt</a> | <a href="#">Pfam</a> | <a href="#">InterPro</a> |
| Metlim_0344 | <a href="#">EHQ34485</a> | PAS/PAC sensor signal transduction histid... | <a href="#">CDD</a> | <a href="#">UniProt</a> | <a href="#">Pfam</a> | <a href="#">InterPro</a> |
| Metlim_0721 | <a href="#">EHQ34844</a> | PAS/PAC sensor signal transduction histid... | <a href="#">CDD</a> | <a href="#">UniProt</a> | <a href="#">Pfam</a> | <a href="#">InterPro</a> |
| Metlim_0814 | <a href="#">EHQ34936</a> | multi-sensor signal transduction histidin... | <a href="#">CDD</a> | <a href="#">UniProt</a> | <a href="#">Pfam</a> | <a href="#">InterPro</a> |
| Metlim_0817 | <a href="#">EHQ34939</a> | PAS/PAC sensor signal transduction histid... | <a href="#">CDD</a> | <a href="#">UniProt</a> | <a href="#">Pfam</a> | <a href="#">InterPro</a> |
| Metlim_0899 | <a href="#">EHQ35021</a> | multi-sensor signal transduction histidin... | <a href="#">CDD</a> | <a href="#">UniProt</a> | <a href="#">Pfam</a> | <a href="#">InterPro</a> |
| Metlim_0909 | <a href="#">EHQ35031</a> | PAS/PAC sensor signal transduction histid... | <a href="#">CDD</a> | <a href="#">UniProt</a> | <a href="#">Pfam</a> | <a href="#">InterPro</a> |
| Metlim_0911 | <a href="#">EHQ35033</a> | histidine kinase [Methanoplanus limicola ... | <a href="#">CDD</a> | <a href="#">UniProt</a> | <a href="#">Pfam</a> | <a href="#">InterPro</a> |
| Metlim_0938 | <a href="#">EHQ35060</a> | histidine kinase [Methanoplanus limicola ... | <a href="#">CDD</a> | <a href="#">UniProt</a> | <a href="#">Pfam</a> | <a href="#">InterPro</a> |
| Metlim_1000 | <a href="#">EHQ35122</a> | PAS/PAC sensor signal transduction histid... | <a href="#">CDD</a> | <a href="#">UniProt</a> | <a href="#">Pfam</a> | <a href="#">InterPro</a> |
| Metlim_1148 | <a href="#">EHQ35259</a> | signal transduction histidine kinase [Met... | <a href="#">CDD</a> | <a href="#">UniProt</a> | <a href="#">Pfam</a> | <a href="#">InterPro</a> |
| Metlim_1168 | <a href="#">EHQ35279</a> | PAS/PAC sensor signal transduction histid... | <a href="#">CDD</a> | <a href="#">UniProt</a> | <a href="#">Pfam</a> | <a href="#">InterPro</a> |
| Metlim_1222 | <a href="#">EHQ35332</a> | integral membrane sensor signal transduct... | <a href="#">CDD</a> | <a href="#">UniProt</a> | <a href="#">Pfam</a> | <a href="#">InterPro</a> |
| Metlim_1317 | <a href="#">EHQ35426</a> | signal transduction histidine kinase [Met... | <a href="#">CDD</a> | <a href="#">UniProt</a> | <a href="#">Pfam</a> | <a href="#">InterPro</a> |
| Metlim_1319 | <a href="#">EHQ35428</a> | signal transduction histidine kinase [Met... | <a href="#">CDD</a> | <a href="#">UniProt</a> | <a href="#">Pfam</a> | <a href="#">InterPro</a> |
| Metlim_1478 | <a href="#">EHQ35581</a> | multi-sensor signal transduction histidin... | <a href="#">CDD</a> | <a href="#">UniProt</a> | <a href="#">Pfam</a> | <a href="#">InterPro</a> |
| Metlim_1502 | <a href="#">EHQ35605</a> | multi-sensor signal transduction histidin... | <a href="#">CDD</a> | <a href="#">UniProt</a> | <a href="#">Pfam</a> | <a href="#">InterPro</a> |
| Metlim_1519 | <a href="#">EHQ35620</a> | multi-sensor signal transduction histidin... | <a href="#">CDD</a> | <a href="#">UniProt</a> | <a href="#">Pfam</a> | <a href="#">InterPro</a> |
| Metlim_1710 | <a href="#">EHQ35811</a> | multi-sensor signal transduction histidin... | <a href="#">CDD</a> | <a href="#">UniProt</a> | <a href="#">Pfam</a> | <a href="#">InterPro</a> |
| Metlim_1992 | <a href="#">EHQ36081</a> | PAS/PAC sensor signal transduction histid... | <a href="#">CDD</a> | <a href="#">UniProt</a> | <a href="#">Pfam</a> | <a href="#">InterPro</a> |
| Metlim_2014 | <a href="#">EHQ36100</a> | multi-sensor signal transduction histidin... | <a href="#">CDD</a> | <a href="#">UniProt</a> | <a href="#">Pfam</a> | <a href="#">InterPro</a> |
| Metlim_2147 | <a href="#">EHQ36222</a> | ATP-binding region ATPase domain protein ... | <a href="#">CDD</a> | <a href="#">UniProt</a> | <a href="#">Pfam</a> | <a href="#">InterPro</a> |
| Metlim_2193 | <a href="#">EHQ36258</a> | integral membrane sensor signal transduct... | <a href="#">CDD</a> | <a href="#">UniProt</a> | <a href="#">Pfam</a> | <a href="#">InterPro</a> |
| Metlim_2233 | <a href="#">EHQ36294</a> | multi-sensor signal transduction histidin... | <a href="#">CDD</a> | <a href="#">UniProt</a> | <a href="#">Pfam</a> | <a href="#">InterPro</a> |
| Metlim_2479 | <a href="#">EHQ36526</a> | multi-sensor signal transduction histidin... | <a href="#">CDD</a> | <a href="#">UniProt</a> | <a href="#">Pfam</a> | <a href="#">InterPro</a> |
| Metlim_2630 | <a href="#">EHQ36671</a> | CheA signal transduction histidine kinase... | <a href="#">CDD</a> | <a href="#">UniProt</a> | <a href="#">Pfam</a> | <a href="#">InterPro</a> |
| Metlim_2717 | <a href="#">EHQ36755</a> | signal transduction histidine kinase [Met... | <a href="#">CDD</a> | <a href="#">UniProt</a> | <a href="#">Pfam</a> | <a href="#">InterPro</a> |
| Metlim_2961 | <a href="#">EHQ36994</a> | PAS/PAC sensor signal transduction histid... | <a href="#">CDD</a> | <a href="#">UniProt</a> | <a href="#">Pfam</a> | <a href="#">InterPro</a> |
| Metlim_2977 | <a href="#">EHQ37009</a> | signal transduction histidine kinase [Met... | <a href="#">CDD</a> | <a href="#">UniProt</a> | <a href="#">Pfam</a> | <a href="#">InterPro</a> |
| Metlim_3018 | <a href="#">EHQ37050</a> | integral membrane sensor signal transduct... | <a href="#">CDD</a> | <a href="#">UniProt</a> | <a href="#">Pfam</a> | <a href="#">InterPro</a> |
| Metlim_3059 | <a href="#">EHQ37091</a> | integral membrane sensor signal transduct... | <a href="#">CDD</a> | <a href="#">UniProt</a> | <a href="#">Pfam</a> | <a href="#">InterPro</a> |

**Hybrid HisK**

|             |                          |                                              |                     |                         |                      |                          |
|-------------|--------------------------|----------------------------------------------|---------------------|-------------------------|----------------------|--------------------------|
| Metlim_2017 | <a href="#">EHQ36103</a> | CheA signal transduction histidine kinase... | <a href="#">CDD</a> | <a href="#">UniProt</a> | <a href="#">Pfam</a> | <a href="#">InterPro</a> |
|-------------|--------------------------|----------------------------------------------|---------------------|-------------------------|----------------------|--------------------------|

**HisKA, no HATPase**

|             |                          |                                              |                     |                         |                      |                          |
|-------------|--------------------------|----------------------------------------------|---------------------|-------------------------|----------------------|--------------------------|
| Metlim_0048 | <a href="#">EHQ34201</a> | PAS sensor protein [Methanoplanus limicol... | <a href="#">CDD</a> | <a href="#">UniProt</a> | <a href="#">Pfam</a> | <a href="#">InterPro</a> |
| Metlim_0685 | <a href="#">EHQ34808</a> | PAS sensor protein [Methanoplanus limicol... | <a href="#">CDD</a> | <a href="#">UniProt</a> | <a href="#">Pfam</a> | <a href="#">InterPro</a> |
| Metlim_1284 | <a href="#">EHQ35393</a> | PAS sensor protein [Methanoplanus limicol... | <a href="#">CDD</a> | <a href="#">UniProt</a> | <a href="#">Pfam</a> | <a href="#">InterPro</a> |
| Metlim_1482 | <a href="#">EHQ35585</a> | PAS sensor protein [Methanoplanus limicol... | <a href="#">CDD</a> | <a href="#">UniProt</a> | <a href="#">Pfam</a> | <a href="#">InterPro</a> |
| Metlim_1987 | <a href="#">EHQ36076</a> | putative PAS/PAC sensor protein [Methanop... | <a href="#">CDD</a> | <a href="#">UniProt</a> | <a href="#">Pfam</a> | <a href="#">InterPro</a> |

**REC only**

|             |                          |                                               |                     |                         |                      |                          |
|-------------|--------------------------|-----------------------------------------------|---------------------|-------------------------|----------------------|--------------------------|
| Metlim_0900 | <a href="#">EHQ35022</a> | response regulator receiver protein [Metha... | <a href="#">CDD</a> | <a href="#">UniProt</a> | <a href="#">Pfam</a> | <a href="#">InterPro</a> |
| Metlim_0907 | <a href="#">EHQ35029</a> | response regulator receiver protein [Metha... | <a href="#">CDD</a> | <a href="#">UniProt</a> | <a href="#">Pfam</a> | <a href="#">InterPro</a> |
| Metlim_1521 | <a href="#">EHQ35622</a> | response regulator receiver protein [Metha... | <a href="#">CDD</a> | <a href="#">UniProt</a> | <a href="#">Pfam</a> | <a href="#">InterPro</a> |
| Metlim_2232 | <a href="#">EHQ36293</a> | response regulator receiver protein [Metha... | <a href="#">CDD</a> | <a href="#">UniProt</a> | <a href="#">Pfam</a> | <a href="#">InterPro</a> |
| Metlim_2583 | <a href="#">EHQ36625</a> | response regulator receiver protein [Metha... | <a href="#">CDD</a> | <a href="#">UniProt</a> | <a href="#">Pfam</a> | <a href="#">InterPro</a> |
| Metlim_2632 | <a href="#">EHQ36673</a> | response regulator receiver protein [Metha... | <a href="#">CDD</a> | <a href="#">UniProt</a> | <a href="#">Pfam</a> | <a href="#">InterPro</a> |

**REC-HisK**

|             |                          |                                               |                     |                         |                      |                          |
|-------------|--------------------------|-----------------------------------------------|---------------------|-------------------------|----------------------|--------------------------|
| Metlim_0842 | <a href="#">EHQ34964</a> | putative PAS/PAC sensor protein [Methanopl... | <a href="#">CDD</a> | <a href="#">UniProt</a> | <a href="#">Pfam</a> | <a href="#">InterPro</a> |
| Metlim_1139 | <a href="#">EHQ35250</a> | signal transduction histidine kinase [Meth... | <a href="#">CDD</a> | <a href="#">UniProt</a> | <a href="#">Pfam</a> | <a href="#">InterPro</a> |
| Metlim_1204 | <a href="#">EHQ35314</a> | multi-sensor signal transduction histidine... | <a href="#">CDD</a> | <a href="#">UniProt</a> | <a href="#">Pfam</a> | <a href="#">InterPro</a> |
| Metlim_1473 | <a href="#">EHQ35576</a> | multi-sensor signal transduction histidin...  | <a href="#">CDD</a> | <a href="#">UniProt</a> | <a href="#">Pfam</a> | <a href="#">InterPro</a> |
| Metlim_1781 | <a href="#">EHQ35882</a> | multi-sensor signal transduction histidin...  | <a href="#">CDD</a> | <a href="#">UniProt</a> | <a href="#">Pfam</a> | <a href="#">InterPro</a> |
| Metlim_1993 | <a href="#">EHQ36082</a> | multi-sensor signal transduction histidin...  | <a href="#">CDD</a> | <a href="#">UniProt</a> | <a href="#">Pfam</a> | <a href="#">InterPro</a> |
| Metlim_2015 | <a href="#">EHQ36101</a> | response regulator receiver sensor signal ... | <a href="#">CDD</a> | <a href="#">UniProt</a> | <a href="#">Pfam</a> | <a href="#">InterPro</a> |
| Metlim_2038 | <a href="#">EHQ36123</a> | multi-sensor signal transduction histidine... | <a href="#">CDD</a> | <a href="#">UniProt</a> | <a href="#">Pfam</a> | <a href="#">InterPro</a> |
| Metlim_2077 | <a href="#">EHQ36162</a> | multi-sensor signal transduction histidine... | <a href="#">CDD</a> | <a href="#">UniProt</a> | <a href="#">Pfam</a> | <a href="#">InterPro</a> |
| Metlim_2136 | <a href="#">EHQ36211</a> | multi-sensor signal transduction histidin...  | <a href="#">CDD</a> | <a href="#">UniProt</a> | <a href="#">Pfam</a> | <a href="#">InterPro</a> |
| Metlim_2137 | <a href="#">EHQ36212</a> | multi-sensor signal transduction histidin...  | <a href="#">CDD</a> | <a href="#">UniProt</a> | <a href="#">Pfam</a> | <a href="#">InterPro</a> |
| Metlim_2140 | <a href="#">EHQ36215</a> | multi-sensor signal transduction histidine... | <a href="#">CDD</a> | <a href="#">UniProt</a> | <a href="#">Pfam</a> | <a href="#">InterPro</a> |
| Metlim_2141 | <a href="#">EHQ36216</a> | putative PAS/PAC sensor protein [Methanopl... | <a href="#">CDD</a> | <a href="#">UniProt</a> | <a href="#">Pfam</a> | <a href="#">InterPro</a> |
| Metlim_2142 | <a href="#">EHQ36217</a> | multi-sensor signal transduction histidine... | <a href="#">CDD</a> | <a href="#">UniProt</a> | <a href="#">Pfam</a> | <a href="#">InterPro</a> |
| Metlim_2143 | <a href="#">EHQ36218</a> | putative PAS/PAC sensor protein [Methanopl... | <a href="#">CDD</a> | <a href="#">UniProt</a> | <a href="#">Pfam</a> | <a href="#">InterPro</a> |
| Metlim_2186 | <a href="#">EHQ36254</a> | response regulator receiver sensor signal ... | <a href="#">CDD</a> | <a href="#">UniProt</a> | <a href="#">Pfam</a> | <a href="#">InterPro</a> |
| Metlim_2231 | <a href="#">EHQ36292</a> | putative PAS/PAC sensor protein [Methanop...  | <a href="#">CDD</a> | <a href="#">UniProt</a> | <a href="#">Pfam</a> | <a href="#">InterPro</a> |
| Metlim_2375 | <a href="#">EHQ36426</a> | multi-sensor signal transduction histidine... | <a href="#">CDD</a> | <a href="#">UniProt</a> | <a href="#">Pfam</a> | <a href="#">InterPro</a> |

**REC-CheB**

|             |                          |                                               |                     |                         |                      |                          |
|-------------|--------------------------|-----------------------------------------------|---------------------|-------------------------|----------------------|--------------------------|
| Metlim_2631 | <a href="#">EHQ36672</a> | response regulator receiver protein [Metha... | <a href="#">CDD</a> | <a href="#">UniProt</a> | <a href="#">Pfam</a> | <a href="#">InterPro</a> |
|-------------|--------------------------|-----------------------------------------------|---------------------|-------------------------|----------------------|--------------------------|

**REC-PAS/GAF**

|             |                          |                                               |                     |                         |                      |                          |
|-------------|--------------------------|-----------------------------------------------|---------------------|-------------------------|----------------------|--------------------------|
| Metlim_0533 | <a href="#">EHQ34668</a> | CheA signal transduction histidine kinase ... | <a href="#">CDD</a> | <a href="#">UniProt</a> | <a href="#">Pfam</a> | <a href="#">InterPro</a> |
| Metlim_0794 | <a href="#">EHQ34917</a> | putative PAS/PAC sensor protein [Methanopl... | <a href="#">CDD</a> | <a href="#">UniProt</a> | <a href="#">Pfam</a> | <a href="#">InterPro</a> |
| Metlim_1147 | <a href="#">EHQ35258</a> | putative PAS/PAC sensor protein [Methanopl... | <a href="#">CDD</a> | <a href="#">UniProt</a> | <a href="#">Pfam</a> | <a href="#">InterPro</a> |
| Metlim_1285 | <a href="#">EHQ35394</a> | putative PAS/PAC sensor protein [Methanopl... | <a href="#">CDD</a> | <a href="#">UniProt</a> | <a href="#">Pfam</a> | <a href="#">InterPro</a> |
| Metlim_2716 | <a href="#">EHQ36754</a> | response regulator receiver protein [Metha... | <a href="#">CDD</a> | <a href="#">UniProt</a> | <a href="#">Pfam</a> | <a href="#">InterPro</a> |
| Metlim_2495 | <a href="#">EHQ36542</a> | response regulator receiver modulated GAF ... | <a href="#">CDD</a> | <a href="#">UniProt</a> | <a href="#">Pfam</a> | <a href="#">InterPro</a> |

**Other RRs**

|             |                          |                                               |                     |                         |                      |                          |                             |
|-------------|--------------------------|-----------------------------------------------|---------------------|-------------------------|----------------------|--------------------------|-----------------------------|
| Metlim_0426 | <a href="#">EHQ34565</a> | putative PAS/PAC sensor protein [Methanopl... | <a href="#">CDD</a> | <a href="#">UniProt</a> | <a href="#">Pfam</a> | <a href="#">InterPro</a> | (REC-PAS-PAS-HisKA)         |
| Metlim_1761 | <a href="#">EHQ35862</a> | response regulator receiver protein [Metha... | <a href="#">CDD</a> | <a href="#">UniProt</a> | <a href="#">Pfam</a> | <a href="#">InterPro</a> | (REC-MetOD2)                |
| Metlim_2029 | <a href="#">EHQ36115</a> | response regulator receiver protein [Metha... | <a href="#">CDD</a> | <a href="#">UniProt</a> | <a href="#">Pfam</a> | <a href="#">InterPro</a> | (REC-MetOD2)                |
| Metlim_2144 | <a href="#">EHQ36219</a> | response regulator receiver protein [Metha... | <a href="#">CDD</a> | <a href="#">UniProt</a> | <a href="#">Pfam</a> | <a href="#">InterPro</a> | (REC-MetOD2)                |
| Metlim_2230 | <a href="#">EHQ36291</a> | response regulator receiver protein [Metha... | <a href="#">CDD</a> | <a href="#">UniProt</a> | <a href="#">Pfam</a> | <a href="#">InterPro</a> | (no archaeal hits)          |
| Metlim_2231 | <a href="#">EHQ36292</a> | putative PAS/PAC sensor protein [Methanopl... | <a href="#">CDD</a> | <a href="#">UniProt</a> | <a href="#">Pfam</a> | <a href="#">InterPro</a> | (REC-PAS-HisKA)             |
| Metlim_3023 | <a href="#">EHQ37055</a> | putative PAS/PAC sensor protein [Methanopl... | <a href="#">CDD</a> | <a href="#">UniProt</a> | <a href="#">Pfam</a> | <a href="#">InterPro</a> | (REC-PAS-xHisKA)            |
| Metlim_3060 | <a href="#">EHQ37092</a> | response regulator receiver protein [Metha... | <a href="#">CDD</a> | <a href="#">UniProt</a> | <a href="#">Pfam</a> | <a href="#">InterPro</a> | (REC-PAS-wHTH-wHTH=DUF1724) |

**Methanoregula boonei 6A8****HisK, no REC**

|           |                          |                                               |                     |                         |                      |                          |
|-----------|--------------------------|-----------------------------------------------|---------------------|-------------------------|----------------------|--------------------------|
| Mboo_0295 | <a href="#">ABS54817</a> | PAS/PAC sensor signal transduction histidi... | <a href="#">CDD</a> | <a href="#">UniProt</a> | <a href="#">Pfam</a> | <a href="#">InterPro</a> |
| Mboo_0328 | <a href="#">ABS54850</a> | putative PAS/PAC sensor protein [Methanore... | <a href="#">CDD</a> | <a href="#">UniProt</a> | <a href="#">Pfam</a> | <a href="#">InterPro</a> |
| Mboo_0467 | <a href="#">ABS54985</a> | multi-sensor signal transduction histidine... | <a href="#">CDD</a> | <a href="#">UniProt</a> | <a href="#">Pfam</a> | <a href="#">InterPro</a> |
| Mboo_0782 | <a href="#">ABS55300</a> | multi-sensor signal transduction histidine... | <a href="#">CDD</a> | <a href="#">UniProt</a> | <a href="#">Pfam</a> | <a href="#">InterPro</a> |
| Mboo_0821 | <a href="#">ABS55339</a> | putative PAS/PAC sensor protein [Methanore... | <a href="#">CDD</a> | <a href="#">UniProt</a> | <a href="#">Pfam</a> | <a href="#">InterPro</a> |
| Mboo_0935 | <a href="#">ABS55453</a> | histidine kinase [Methanoregula boonei 6A8... | <a href="#">CDD</a> | <a href="#">UniProt</a> | <a href="#">Pfam</a> | <a href="#">InterPro</a> |
| Mboo_0936 | <a href="#">ABS55454</a> | signal transduction histidine kinase [Meth... | <a href="#">CDD</a> | <a href="#">UniProt</a> | <a href="#">Pfam</a> | <a href="#">InterPro</a> |
| Mboo_0999 | <a href="#">ABS55517</a> | multi-sensor signal transduction histidine... | <a href="#">CDD</a> | <a href="#">UniProt</a> | <a href="#">Pfam</a> | <a href="#">InterPro</a> |
| Mboo_1008 | <a href="#">ABS55526</a> | signal transduction histidine kinase [Meth... | <a href="#">CDD</a> | <a href="#">UniProt</a> | <a href="#">Pfam</a> | <a href="#">InterPro</a> |
| Mboo_1028 | <a href="#">ABS55546</a> | integral membrane sensor signal transducti... | <a href="#">CDD</a> | <a href="#">UniProt</a> | <a href="#">Pfam</a> | <a href="#">InterPro</a> |
| Mboo_1104 | <a href="#">ABS55622</a> | multi-sensor signal transduction histidine... | <a href="#">CDD</a> | <a href="#">UniProt</a> | <a href="#">Pfam</a> | <a href="#">InterPro</a> |
| Mboo_1112 | <a href="#">ABS55630</a> | multi-sensor signal transduction histidine... | <a href="#">CDD</a> | <a href="#">UniProt</a> | <a href="#">Pfam</a> | <a href="#">InterPro</a> |
| Mboo_1119 | <a href="#">ABS55637</a> | multi-sensor signal transduction histidine... | <a href="#">CDD</a> | <a href="#">UniProt</a> | <a href="#">Pfam</a> | <a href="#">InterPro</a> |
| Mboo_1140 | <a href="#">ABS55658</a> | multi-sensor signal transduction histidine... | <a href="#">CDD</a> | <a href="#">UniProt</a> | <a href="#">Pfam</a> | <a href="#">InterPro</a> |
| Mboo_1231 | <a href="#">ABS55749</a> | integral membrane sensor signal transducti... | <a href="#">CDD</a> | <a href="#">UniProt</a> | <a href="#">Pfam</a> | <a href="#">InterPro</a> |
| Mboo_1244 | <a href="#">ABS55762</a> | PAS/PAC sensor signal transduction histidi... | <a href="#">CDD</a> | <a href="#">UniProt</a> | <a href="#">Pfam</a> | <a href="#">InterPro</a> |
| Mboo_1250 | <a href="#">ABS55768</a> | PAS/PAC sensor signal transduction histidi... | <a href="#">CDD</a> | <a href="#">UniProt</a> | <a href="#">Pfam</a> | <a href="#">InterPro</a> |
| Mboo_1336 | <a href="#">ABS55854</a> | CheA signal transduction histidine kinase ... | <a href="#">CDD</a> | <a href="#">UniProt</a> | <a href="#">Pfam</a> | <a href="#">InterPro</a> |
| Mboo_1359 | <a href="#">ABS55877</a> | signal transduction histidine kinase [Meth... | <a href="#">CDD</a> | <a href="#">UniProt</a> | <a href="#">Pfam</a> | <a href="#">InterPro</a> |
| Mboo_1487 | <a href="#">ABS56005</a> | signal transduction histidine kinase [Meth... | <a href="#">CDD</a> | <a href="#">UniProt</a> | <a href="#">Pfam</a> | <a href="#">InterPro</a> |
| Mboo_1496 | <a href="#">ABS56014</a> | signal transduction histidine kinase [Meth... | <a href="#">CDD</a> | <a href="#">UniProt</a> | <a href="#">Pfam</a> | <a href="#">InterPro</a> |
| Mboo_1516 | <a href="#">ABS56034</a> | signal transduction histidine kinase [Meth... | <a href="#">CDD</a> | <a href="#">UniProt</a> | <a href="#">Pfam</a> | <a href="#">InterPro</a> |
| Mboo_1527 | <a href="#">ABS56045</a> | signal transduction histidine kinase [Meth... | <a href="#">CDD</a> | <a href="#">UniProt</a> | <a href="#">Pfam</a> | <a href="#">InterPro</a> |
| Mboo_1806 | <a href="#">ABS56322</a> | signal transduction histidine kinase [Meth... | <a href="#">CDD</a> | <a href="#">UniProt</a> | <a href="#">Pfam</a> | <a href="#">InterPro</a> |
| Mboo_1810 | <a href="#">ABS56326</a> | PAS/PAC sensor signal transduction histidi... | <a href="#">CDD</a> | <a href="#">UniProt</a> | <a href="#">Pfam</a> | <a href="#">InterPro</a> |
| Mboo_1979 | <a href="#">ABS56493</a> | multi-sensor signal transduction histidine... | <a href="#">CDD</a> | <a href="#">UniProt</a> | <a href="#">Pfam</a> | <a href="#">InterPro</a> |
| Mboo_2061 | <a href="#">ABS56575</a> | signal transduction histidine kinase regul... | <a href="#">CDD</a> | <a href="#">UniProt</a> | <a href="#">Pfam</a> | <a href="#">InterPro</a> |
| Mboo_2200 | <a href="#">ABS56714</a> | histidine kinase [Methanoregula boonei 6A8... | <a href="#">CDD</a> | <a href="#">UniProt</a> | <a href="#">Pfam</a> | <a href="#">InterPro</a> |
| Mboo_2408 | <a href="#">ABS56922</a> | signal transduction histidine kinase [Meth... | <a href="#">CDD</a> | <a href="#">UniProt</a> | <a href="#">Pfam</a> | <a href="#">InterPro</a> |
| Mboo_2409 | <a href="#">ABS56923</a> | integral membrane sensor signal transducti... | <a href="#">CDD</a> | <a href="#">UniProt</a> | <a href="#">Pfam</a> | <a href="#">InterPro</a> |

**HisKA, no HATPase**

|           |                          |                                               |                     |                         |                      |                          |
|-----------|--------------------------|-----------------------------------------------|---------------------|-------------------------|----------------------|--------------------------|
| Mboo_1107 | <a href="#">ABS55625</a> | putative PAS/PAC sensor protein [Methanore... | <a href="#">CDD</a> | <a href="#">UniProt</a> | <a href="#">Pfam</a> | <a href="#">InterPro</a> |
|-----------|--------------------------|-----------------------------------------------|---------------------|-------------------------|----------------------|--------------------------|

**REC only**

|           |                          |                                               |                     |                         |                      |                          |
|-----------|--------------------------|-----------------------------------------------|---------------------|-------------------------|----------------------|--------------------------|
| Mboo_0332 | <a href="#">ABS54853</a> | response regulator receiver protein [Metha... | <a href="#">CDD</a> | <a href="#">UniProt</a> | <a href="#">Pfam</a> | <a href="#">InterPro</a> |
| Mboo_0900 | <a href="#">ABS55418</a> | response regulator receiver protein [Metha... | <a href="#">CDD</a> | <a href="#">UniProt</a> | <a href="#">Pfam</a> | <a href="#">InterPro</a> |

|                              |                          |                                               |     |                         |                      |                          |                   |
|------------------------------|--------------------------|-----------------------------------------------|-----|-------------------------|----------------------|--------------------------|-------------------|
| Mboo_0913                    | <a href="#">ABS55431</a> | response regulator receiver protein [Metha... | CDD | <a href="#">UniProt</a> | <a href="#">Pfam</a> | <a href="#">InterPro</a> |                   |
| Mboo_1023                    | <a href="#">ABS55541</a> | response regulator receiver protein [Metha... | CDD | <a href="#">UniProt</a> | <a href="#">Pfam</a> | <a href="#">InterPro</a> |                   |
| Mboo_1102                    | <a href="#">ABS55620</a> | response regulator receiver protein [Metha... | CDD | <a href="#">UniProt</a> | <a href="#">Pfam</a> | <a href="#">InterPro</a> |                   |
| Mboo_1120                    | <a href="#">ABS55638</a> | response regulator receiver protein [Metha... | CDD | <a href="#">UniProt</a> | <a href="#">Pfam</a> | <a href="#">InterPro</a> |                   |
| Mboo_1246                    | <a href="#">ABS55764</a> | response regulator receiver protein [Metha... | CDD | <a href="#">UniProt</a> | <a href="#">Pfam</a> | <a href="#">InterPro</a> |                   |
| Mboo_1338                    | <a href="#">ABS55856</a> | response regulator receiver protein [Metha... | CDD | <a href="#">UniProt</a> | <a href="#">Pfam</a> | <a href="#">InterPro</a> |                   |
| Mboo_1517                    | <a href="#">ABS56035</a> | response regulator receiver protein [Metha... | CDD | <a href="#">UniProt</a> | <a href="#">Pfam</a> | <a href="#">InterPro</a> |                   |
| Mboo_1697                    | <a href="#">ABS56214</a> | response regulator receiver protein [Metha... | CDD | <a href="#">UniProt</a> | <a href="#">Pfam</a> | <a href="#">InterPro</a> |                   |
| Mboo_1698                    | <a href="#">ABS56215</a> | response regulator receiver protein [Metha... | CDD | <a href="#">UniProt</a> | <a href="#">Pfam</a> | <a href="#">InterPro</a> |                   |
| Mboo_1811                    | <a href="#">ABS56327</a> | response regulator receiver protein [Metha... | CDD | <a href="#">UniProt</a> | <a href="#">Pfam</a> | <a href="#">InterPro</a> |                   |
| Mboo_1814                    | <a href="#">ABS56330</a> | response regulator receiver protein [Metha... | CDD | <a href="#">UniProt</a> | <a href="#">Pfam</a> | <a href="#">InterPro</a> |                   |
| Mboo_2092                    | <a href="#">ABS56606</a> | response regulator receiver protein [Metha... | CDD | <a href="#">UniProt</a> | <a href="#">Pfam</a> | <a href="#">InterPro</a> |                   |
| Mboo_2407                    | <a href="#">ABS56921</a> | response regulator receiver protein [Metha... | CDD | <a href="#">UniProt</a> | <a href="#">Pfam</a> | <a href="#">InterPro</a> |                   |
| <b>FrzZ family (REC-REC)</b> |                          |                                               |     |                         |                      |                          |                   |
| Mboo_2154                    | <a href="#">ABS56668</a> | response regulator receiver protein [Metha... | CDD | <a href="#">UniProt</a> | <a href="#">Pfam</a> | <a href="#">InterPro</a> |                   |
| <b>REC-HisK</b>              |                          |                                               |     |                         |                      |                          |                   |
| Mboo_0161                    | <a href="#">ABS54684</a> | multi-sensor signal transduction histidine... | CDD | <a href="#">UniProt</a> | <a href="#">Pfam</a> | <a href="#">InterPro</a> |                   |
| Mboo_0274                    | <a href="#">ABS54796</a> | multi-sensor signal transduction histidine... | CDD | <a href="#">UniProt</a> | <a href="#">Pfam</a> | <a href="#">InterPro</a> |                   |
| Mboo_0292                    | <a href="#">ABS54814</a> | multi-sensor signal transduction histidine... | CDD | <a href="#">UniProt</a> | <a href="#">Pfam</a> | <a href="#">InterPro</a> |                   |
| Mboo_0309                    | <a href="#">ABS54831</a> | multi-sensor signal transduction histidine... | CDD | <a href="#">UniProt</a> | <a href="#">Pfam</a> | <a href="#">InterPro</a> |                   |
| Mboo_0331                    | <a href="#">ABS54852</a> | multi-sensor signal transduction histidine... | CDD | <a href="#">UniProt</a> | <a href="#">Pfam</a> | <a href="#">InterPro</a> |                   |
| Mboo_0338                    | <a href="#">ABS54859</a> | multi-sensor signal transduction histidine... | CDD | <a href="#">UniProt</a> | <a href="#">Pfam</a> | <a href="#">InterPro</a> |                   |
| Mboo_0339                    | <a href="#">ABS54860</a> | multi-sensor signal transduction histidine... | CDD | <a href="#">UniProt</a> | <a href="#">Pfam</a> | <a href="#">InterPro</a> |                   |
| Mboo_0402                    | <a href="#">ABS54922</a> | multi-sensor signal transduction histidine... | CDD | <a href="#">UniProt</a> | <a href="#">Pfam</a> | <a href="#">InterPro</a> |                   |
| Mboo_0459                    | <a href="#">ABS54977</a> | multi-sensor signal transduction histidine... | CDD | <a href="#">UniProt</a> | <a href="#">Pfam</a> | <a href="#">InterPro</a> |                   |
| Mboo_0640                    | <a href="#">ABS55158</a> | multi-sensor signal transduction histidine... | CDD | <a href="#">UniProt</a> | <a href="#">Pfam</a> | <a href="#">InterPro</a> |                   |
| Mboo_1121                    | <a href="#">ABS55639</a> | multi-sensor signal transduction histidine... | CDD | <a href="#">UniProt</a> | <a href="#">Pfam</a> | <a href="#">InterPro</a> |                   |
| Mboo_1242                    | <a href="#">ABS55760</a> | multi-sensor signal transduction histidine... | CDD | <a href="#">UniProt</a> | <a href="#">Pfam</a> | <a href="#">InterPro</a> |                   |
| Mboo_1360                    | <a href="#">ABS55878</a> | signal transduction histidine kinase [Meth... | CDD | <a href="#">UniProt</a> | <a href="#">Pfam</a> | <a href="#">InterPro</a> |                   |
| Mboo_1463                    | <a href="#">ABS55981</a> | multi-sensor signal transduction histidine... | CDD | <a href="#">UniProt</a> | <a href="#">Pfam</a> | <a href="#">InterPro</a> |                   |
| Mboo_1464                    | <a href="#">ABS55982</a> | multi-sensor signal transduction histidine... | CDD | <a href="#">UniProt</a> | <a href="#">Pfam</a> | <a href="#">InterPro</a> |                   |
| Mboo_1482                    | <a href="#">ABS56000</a> | multi-sensor signal transduction histidine... | CDD | <a href="#">UniProt</a> | <a href="#">Pfam</a> | <a href="#">InterPro</a> |                   |
| Mboo_1502                    | <a href="#">ABS56020</a> | multi-sensor signal transduction histidine... | CDD | <a href="#">UniProt</a> | <a href="#">Pfam</a> | <a href="#">InterPro</a> |                   |
| Mboo_1520                    | <a href="#">ABS56038</a> | multi-sensor signal transduction histidine... | CDD | <a href="#">UniProt</a> | <a href="#">Pfam</a> | <a href="#">InterPro</a> |                   |
| Mboo_1812                    | <a href="#">ABS56328</a> | signal transduction histidine kinase [Meth... | CDD | <a href="#">UniProt</a> | <a href="#">Pfam</a> | <a href="#">InterPro</a> |                   |
| Mboo_2107                    | <a href="#">ABS56621</a> | multi-sensor signal transduction histidine... | CDD | <a href="#">UniProt</a> | <a href="#">Pfam</a> | <a href="#">InterPro</a> |                   |
| Mboo_2110                    | <a href="#">ABS56624</a> | multi-sensor signal transduction histidine... | CDD | <a href="#">UniProt</a> | <a href="#">Pfam</a> | <a href="#">InterPro</a> |                   |
| Mboo_2366                    | <a href="#">ABS56880</a> | multi-sensor signal transduction histidine... | CDD | <a href="#">UniProt</a> | <a href="#">Pfam</a> | <a href="#">InterPro</a> |                   |
| <b>REC-CheB</b>              |                          |                                               |     |                         |                      |                          |                   |
| Mboo_1337                    | <a href="#">ABS55855</a> | response regulator receiver protein [Metha... | CDD | <a href="#">UniProt</a> | <a href="#">Pfam</a> | <a href="#">InterPro</a> |                   |
| <b>REC-PAS/GAF</b>           |                          |                                               |     |                         |                      |                          |                   |
| Mboo_1007                    | <a href="#">ABS55525</a> | putative GAF sensor protein [Methanoregula... | CDD | <a href="#">UniProt</a> | <a href="#">Pfam</a> | <a href="#">InterPro</a> |                   |
| Mboo_1497                    | <a href="#">ABS56015</a> | putative PAS/PAC sensor protein [Methanore... | CDD | <a href="#">UniProt</a> | <a href="#">Pfam</a> | <a href="#">InterPro</a> |                   |
| Mboo_1807                    | <a href="#">ABS56323</a> | putative PAS/PAC sensor protein [Methanore... | CDD | <a href="#">UniProt</a> | <a href="#">Pfam</a> | <a href="#">InterPro</a> |                   |
| Mboo_1808                    | <a href="#">ABS56324</a> | putative PAS/PAC sensor protein [Methanore... | CDD | <a href="#">UniProt</a> | <a href="#">Pfam</a> | <a href="#">InterPro</a> |                   |
| Mboo_1813                    | <a href="#">ABS56329</a> | response regulator receiver protein [Metha... | CDD | <a href="#">UniProt</a> | <a href="#">Pfam</a> | <a href="#">InterPro</a> |                   |
| Mboo_1912                    | <a href="#">ABS56427</a> | response regulator receiver protein [Metha... | CDD | <a href="#">UniProt</a> | <a href="#">Pfam</a> | <a href="#">InterPro</a> |                   |
| <b>Other RRs</b>             |                          |                                               |     |                         |                      |                          |                   |
| Mboo_0795                    | <a href="#">ABS55313</a> | putative PAS/PAC sensor protein [Methanore... | CDD | <a href="#">UniProt</a> | <a href="#">Pfam</a> | <a href="#">InterPro</a> | (REC-PAS-TPR)     |
| Mboo_0887                    | <a href="#">ABS55405</a> | response regulator receiver protein [Metha... | CDD | <a href="#">UniProt</a> | <a href="#">Pfam</a> | <a href="#">InterPro</a> | (REC-Smc)         |
| Mboo_0965                    | <a href="#">ABS55483</a> | response regulator receiver protein [Metha... | CDD | <a href="#">UniProt</a> | <a href="#">Pfam</a> | <a href="#">InterPro</a> | (MetOD3-REC-      |
| MetOD2)                      |                          |                                               |     |                         |                      |                          |                   |
| Mboo_1245                    | <a href="#">ABS55763</a> | putative PAS/PAC sensor protein [Methanore... | CDD | <a href="#">UniProt</a> | <a href="#">Pfam</a> | <a href="#">InterPro</a> | (REC-PAS-GAF)     |
| Mboo_1311                    | <a href="#">ABS55829</a> | putative PAS/PAC sensor protein [Methanore... | CDD | <a href="#">UniProt</a> | <a href="#">Pfam</a> | <a href="#">InterPro</a> | (REC-PAS-xHisKA)  |
| Mboo_1358                    | <a href="#">ABS55876</a> | putative PAS/PAC sensor protein [Methanore... | CDD | <a href="#">UniProt</a> | <a href="#">Pfam</a> | <a href="#">InterPro</a> | (REC-PAS-TPR)     |
| Mboo_1478                    | <a href="#">ABS55996</a> | response regulator receiver protein [Metha... | CDD | <a href="#">UniProt</a> | <a href="#">Pfam</a> | <a href="#">InterPro</a> | (MetOD3-REC-      |
| MetOD2)                      |                          |                                               |     |                         |                      |                          |                   |
| Mboo_1488                    | <a href="#">ABS56006</a> | response regulator receiver protein [Metha... | CDD | <a href="#">UniProt</a> | <a href="#">Pfam</a> | <a href="#">InterPro</a> | (REC-xxx-         |
| HTH/PadR)                    |                          |                                               |     |                         |                      |                          |                   |
| Mboo_1528                    | <a href="#">ABS56046</a> | response regulator receiver protein [Metha... | CDD | <a href="#">UniProt</a> | <a href="#">Pfam</a> | <a href="#">InterPro</a> | (REC-xxx-         |
| HTH/PadR)                    |                          |                                               |     |                         |                      |                          |                   |
| Mboo_1609                    | <a href="#">ABS56126</a> | response regulator receiver protein [Metha... | CDD | <a href="#">UniProt</a> | <a href="#">Pfam</a> | <a href="#">InterPro</a> | (MetOD5-REC)      |
| Mboo_1616                    | <a href="#">ABS56133</a> | putative PAS/PAC sensor protein [Methanore... | CDD | <a href="#">UniProt</a> | <a href="#">Pfam</a> | <a href="#">InterPro</a> | (REC-PAS-PAS-     |
| DisA)                        |                          |                                               |     |                         |                      |                          |                   |
| Mboo_1936                    | <a href="#">ABS56451</a> | response regulator receiver protein [Metha... | CDD | <a href="#">UniProt</a> | <a href="#">Pfam</a> | <a href="#">InterPro</a> | (REC-MetOD2)      |
| Mboo_1937                    | <a href="#">ABS56452</a> | response regulator receiver protein [Metha... | CDD | <a href="#">UniProt</a> | <a href="#">Pfam</a> | <a href="#">InterPro</a> | (REC-MetOD2)      |
| Mboo_1949                    | <a href="#">ABS56464</a> | putative PAS/PAC sensor protein [Methanorg... | CDD | <a href="#">UniProt</a> | <a href="#">Pfam</a> | <a href="#">InterPro</a> | (REC-PAS-TPR)     |
| Mboo_2032                    | <a href="#">ABS56546</a> | response regulator receiver protein [Metha... | CDD | <a href="#">UniProt</a> | <a href="#">Pfam</a> | <a href="#">InterPro</a> | (REC-TPR)         |
| Mboo_2267                    | <a href="#">ABS56781</a> | putative PAS/PAC sensor protein [Methanore... | CDD | <a href="#">UniProt</a> | <a href="#">Pfam</a> | <a href="#">InterPro</a> | (REC-PAS-PAS-xxx) |
| Mboo_2336                    | <a href="#">ABS56850</a> | response regulator receiver protein [Metha... | CDD | <a href="#">UniProt</a> | <a href="#">Pfam</a> | <a href="#">InterPro</a> | (xxx_REC)         |
| Mboo_2365                    | <a href="#">ABS56879</a> | response regulator receiver protein [Metha... | CDD | <a href="#">UniProt</a> | <a href="#">Pfam</a> | <a href="#">InterPro</a> | (REC-MetOD2)      |

### Methanoregula formicica SMSP

#### HisK, no REC

|             |                          |                                              |     |                         |                      |                          |  |
|-------------|--------------------------|----------------------------------------------|-----|-------------------------|----------------------|--------------------------|--|
| Metfor_0128 | <a href="#">AGB01213</a> | PAS domain S-box [Methanoregula formicica... | CDD | <a href="#">UniProt</a> | <a href="#">Pfam</a> | <a href="#">InterPro</a> |  |
| Metfor_0165 | <a href="#">AGB01247</a> | histidine kinase [Methanoregula formicica... | CDD | <a href="#">UniProt</a> | <a href="#">Pfam</a> | <a href="#">InterPro</a> |  |
| Metfor_0385 | <a href="#">AGB01459</a> | PAS domain S-box [Methanoregula formicica... | CDD | <a href="#">UniProt</a> | <a href="#">Pfam</a> | <a href="#">InterPro</a> |  |
| Metfor_0407 | <a href="#">AGB01480</a> | PAS domain S-box [Methanoregula formicica... | CDD | <a href="#">UniProt</a> | <a href="#">Pfam</a> | <a href="#">InterPro</a> |  |

|                    |                          |                                               |     |                         |                      |                          |                     |
|--------------------|--------------------------|-----------------------------------------------|-----|-------------------------|----------------------|--------------------------|---------------------|
| Metfor_0409        | <a href="#">AGB01482</a> | periplasmic component of amino acid ABC-t...  | CDD | <a href="#">UniProt</a> | <a href="#">Pfam</a> | <a href="#">InterPro</a> |                     |
| Metfor_0465        | <a href="#">AGB01537</a> | PAS domain S-box [Methanoregula formicica...  | CDD | <a href="#">UniProt</a> | <a href="#">Pfam</a> | <a href="#">InterPro</a> |                     |
| Metfor_0520        | <a href="#">AGB01590</a> | histidine kinase [Methanoregula formicica...  | CDD | <a href="#">UniProt</a> | <a href="#">Pfam</a> | <a href="#">InterPro</a> |                     |
| Metfor_0557        | <a href="#">AGB01620</a> | PAS domain S-box [Methanoregula formicica...  | CDD | <a href="#">UniProt</a> | <a href="#">Pfam</a> | <a href="#">InterPro</a> |                     |
| Metfor_1106        | <a href="#">AGB02154</a> | bacteriophytochrome (light-regulated sign...  | CDD | <a href="#">UniProt</a> | <a href="#">Pfam</a> | <a href="#">InterPro</a> |                     |
| Metfor_1181        | <a href="#">AGB02255</a> | PAS domain S-box [Methanoregula formicica...  | CDD | <a href="#">UniProt</a> | <a href="#">Pfam</a> | <a href="#">InterPro</a> |                     |
| Metfor_1257        | <a href="#">AGB02300</a> | PAS domain S-box [Methanoregula formicica...  | CDD | <a href="#">UniProt</a> | <a href="#">Pfam</a> | <a href="#">InterPro</a> |                     |
| Metfor_1519        | <a href="#">AGB02552</a> | chemotaxis protein histidine kinase-like ...  | CDD | <a href="#">UniProt</a> | <a href="#">Pfam</a> | <a href="#">InterPro</a> |                     |
| Metfor_1687        | <a href="#">AGB02714</a> | bacteriophytochrome (light-regulated sign...  | CDD | <a href="#">UniProt</a> | <a href="#">Pfam</a> | <a href="#">InterPro</a> |                     |
| Metfor_1755        | <a href="#">AGB02779</a> | PAS domain S-box [Methanoregula formicica...  | CDD | <a href="#">UniProt</a> | <a href="#">Pfam</a> | <a href="#">InterPro</a> |                     |
| Metfor_1887        | <a href="#">AGB02908</a> | PAS domain S-box [Methanoregula formicica...  | CDD | <a href="#">UniProt</a> | <a href="#">Pfam</a> | <a href="#">InterPro</a> |                     |
| Metfor_1974        | <a href="#">AGB02988</a> | PAS domain S-box [Methanoregula formicica...  | CDD | <a href="#">UniProt</a> | <a href="#">Pfam</a> | <a href="#">InterPro</a> |                     |
| Metfor_2040        | <a href="#">AGB03053</a> | PAS domain S-box [Methanoregula formicica...  | CDD | <a href="#">UniProt</a> | <a href="#">Pfam</a> | <a href="#">InterPro</a> |                     |
| Metfor_2139        | <a href="#">AGB03145</a> | PAS domain S-box [Methanoregula formicica...  | CDD | <a href="#">UniProt</a> | <a href="#">Pfam</a> | <a href="#">InterPro</a> |                     |
| Metfor_2145        | <a href="#">AGB03151</a> | PAS domain S-box [Methanoregula formicica...  | CDD | <a href="#">UniProt</a> | <a href="#">Pfam</a> | <a href="#">InterPro</a> |                     |
| Metfor_2161        | <a href="#">AGB03167</a> | PAS domain S-box [Methanoregula formicica...  | CDD | <a href="#">UniProt</a> | <a href="#">Pfam</a> | <a href="#">InterPro</a> |                     |
| Metfor_2184        | <a href="#">AGB03190</a> | PAS domain S-box [Methanoregula formicica...  | CDD | <a href="#">UniProt</a> | <a href="#">Pfam</a> | <a href="#">InterPro</a> |                     |
| Metfor_2191        | <a href="#">AGB03197</a> | PAS domain S-box [Methanoregula formicica...  | CDD | <a href="#">UniProt</a> | <a href="#">Pfam</a> | <a href="#">InterPro</a> |                     |
| Metfor_2187        | <a href="#">AGB03193</a> | PAS domain S-box [Methanoregula formicica...  | CDD | <a href="#">UniProt</a> | <a href="#">Pfam</a> | <a href="#">InterPro</a> |                     |
| Metfor_2193        | <a href="#">AGB03199</a> | PAS domain S-box [Methanoregula formicica...  | CDD | <a href="#">UniProt</a> | <a href="#">Pfam</a> | <a href="#">InterPro</a> |                     |
| Metfor_2194        | <a href="#">AGB03200</a> | PAS domain S-box [Methanoregula formicica...  | CDD | <a href="#">UniProt</a> | <a href="#">Pfam</a> | <a href="#">InterPro</a> |                     |
| Metfor_2269        | <a href="#">AGB03274</a> | PAS domain S-box [Methanoregula formicica...  | CDD | <a href="#">UniProt</a> | <a href="#">Pfam</a> | <a href="#">InterPro</a> |                     |
| Metfor_2327        | <a href="#">AGB03331</a> | signal transduction histidine kinase [Met...  | CDD | <a href="#">UniProt</a> | <a href="#">Pfam</a> | <a href="#">InterPro</a> |                     |
| Metfor_2801        | <a href="#">AGB03784</a> | PAS domain S-box [Methanoregula formicica...  | CDD | <a href="#">UniProt</a> | <a href="#">Pfam</a> | <a href="#">InterPro</a> |                     |
| Metfor_2804        | <a href="#">AGB03787</a> | PAS domain S-box [Methanoregula formicica...  | CDD | <a href="#">UniProt</a> | <a href="#">Pfam</a> | <a href="#">InterPro</a> |                     |
| *Metfor_0342       | <a href="#">AGB01419</a> | histidine kinase, PAS domain-containing pr... | CDD | <a href="#">UniProt</a> | <a href="#">Pfam</a> | <a href="#">InterPro</a> |                     |
| <b>Hybrid HisK</b> |                          |                                               |     |                         |                      |                          |                     |
| Metfor_1885        | <a href="#">AGB02906</a> | chemotaxis protein histidine kinase-like ...  | CDD | <a href="#">UniProt</a> | <a href="#">Pfam</a> | <a href="#">InterPro</a> |                     |
| <b>REC only</b>    |                          |                                               |     |                         |                      |                          |                     |
| Metfor_0758        | <a href="#">AGB01818</a> | response regulator with CheY-like receiver... | CDD | <a href="#">UniProt</a> | <a href="#">Pfam</a> | <a href="#">InterPro</a> |                     |
| Metfor_1517        | <a href="#">AGB02550</a> | response regulator with CheY-like receiver... | CDD | <a href="#">UniProt</a> | <a href="#">Pfam</a> | <a href="#">InterPro</a> |                     |
| Metfor_2138        | <a href="#">AGB03144</a> | CheY-like receiver domain-containing prote... | CDD | <a href="#">UniProt</a> | <a href="#">Pfam</a> | <a href="#">InterPro</a> |                     |
| Metfor_2143        | <a href="#">AGB03149</a> | response regulator with CheY-like receiver... | CDD | <a href="#">UniProt</a> | <a href="#">Pfam</a> | <a href="#">InterPro</a> |                     |
| Metfor_2328        | <a href="#">AGB03332</a> | CheY-like receiver domain-containing prote... | CDD | <a href="#">UniProt</a> | <a href="#">Pfam</a> | <a href="#">InterPro</a> |                     |
| <b>REC-HisK</b>    |                          |                                               |     |                         |                      |                          |                     |
| Metfor_0001        | <a href="#">AGB01089</a> | PAS domain S-box [Methanoregula formicica ... | CDD | <a href="#">UniProt</a> | <a href="#">Pfam</a> | <a href="#">InterPro</a> |                     |
| Metfor_0062        | <a href="#">AGB01148</a> | PAS domain S-box [Methanoregula formicica ... | CDD | <a href="#">UniProt</a> | <a href="#">Pfam</a> | <a href="#">InterPro</a> |                     |
| Metfor_0164        | <a href="#">AGB01246</a> | PAS domain S-box [Methanoregula formicica ... | CDD | <a href="#">UniProt</a> | <a href="#">Pfam</a> | <a href="#">InterPro</a> |                     |
| Metfor_0325        | <a href="#">AGB01402</a> | PAS domain S-box [Methanoregula formicica ... | CDD | <a href="#">UniProt</a> | <a href="#">Pfam</a> | <a href="#">InterPro</a> |                     |
| Metfor_0384        | <a href="#">AGB01458</a> | PAS domain S-box [Methanoregula formicica ... | CDD | <a href="#">UniProt</a> | <a href="#">Pfam</a> | <a href="#">InterPro</a> |                     |
| Metfor_0534        | <a href="#">AGB01604</a> | PAS domain S-box [Methanoregula formicica ... | CDD | <a href="#">UniProt</a> | <a href="#">Pfam</a> | <a href="#">InterPro</a> |                     |
| Metfor_0945        | <a href="#">AGB02000</a> | PAS domain S-box [Methanoregula formicica ... | CDD | <a href="#">UniProt</a> | <a href="#">Pfam</a> | <a href="#">InterPro</a> |                     |
| Metfor_1387        | <a href="#">AGB02426</a> | PAS domain S-box [Methanoregula formicica ... | CDD | <a href="#">UniProt</a> | <a href="#">Pfam</a> | <a href="#">InterPro</a> |                     |
| Metfor_1886        | <a href="#">AGB02907</a> | response regulator containing a CheY-like ... | CDD | <a href="#">UniProt</a> | <a href="#">Pfam</a> | <a href="#">InterPro</a> |                     |
| Metfor_1959        | <a href="#">AGB02974</a> | PAS domain S-box [Methanoregula formicica ... | CDD | <a href="#">UniProt</a> | <a href="#">Pfam</a> | <a href="#">InterPro</a> |                     |
| Metfor_2072        | <a href="#">AGB03081</a> | response regulator containing a CheY-like ... | CDD | <a href="#">UniProt</a> | <a href="#">Pfam</a> | <a href="#">InterPro</a> |                     |
| Metfor_2186        | <a href="#">AGB03192</a> | Response regulator receiver domain protein... | CDD | <a href="#">UniProt</a> | <a href="#">Pfam</a> | <a href="#">InterPro</a> |                     |
| Metfor_2228        | <a href="#">AGB03233</a> | PAS domain S-box [Methanoregula formicica ... | CDD | <a href="#">UniProt</a> | <a href="#">Pfam</a> | <a href="#">InterPro</a> |                     |
| Metfor_2240        | <a href="#">AGB03245</a> | PAS domain S-box [Methanoregula formicica ... | CDD | <a href="#">UniProt</a> | <a href="#">Pfam</a> | <a href="#">InterPro</a> |                     |
| Metfor_2326        | <a href="#">AGB03330</a> | PAS domain S-box [Methanoregula formicica ... | CDD | <a href="#">UniProt</a> | <a href="#">Pfam</a> | <a href="#">InterPro</a> |                     |
| Metfor_2329        | <a href="#">AGB03333</a> | bacteriophytochrome (light-regulated signa... | CDD | <a href="#">UniProt</a> | <a href="#">Pfam</a> | <a href="#">InterPro</a> |                     |
| Metfor_2398        | <a href="#">AGB03400</a> | PAS domain S-box [Methanoregula formicica ... | CDD | <a href="#">UniProt</a> | <a href="#">Pfam</a> | <a href="#">InterPro</a> |                     |
| Metfor_2747        | <a href="#">AGB03732</a> | signal transduction histidine kinase [Meth... | CDD | <a href="#">UniProt</a> | <a href="#">Pfam</a> | <a href="#">InterPro</a> |                     |
| Metfor_2844        | <a href="#">AGB03827</a> | PAS domain S-box [Methanoregula formicica...  | CDD | <a href="#">UniProt</a> | <a href="#">Pfam</a> | <a href="#">InterPro</a> |                     |
| Metfor_2917        | <a href="#">AGB03897</a> | PAS domain S-box [Methanoregula formicica ... | CDD | <a href="#">UniProt</a> | <a href="#">Pfam</a> | <a href="#">InterPro</a> |                     |
| <b>REC-CheB</b>    |                          |                                               |     |                         |                      |                          |                     |
| Metfor_1518        | <a href="#">AGB02551</a> | response regulator with CheY-like receiver... | CDD | <a href="#">UniProt</a> | <a href="#">Pfam</a> | <a href="#">InterPro</a> |                     |
| <b>REC-PAS/GAF</b> |                          |                                               |     |                         |                      |                          |                     |
| Metfor_0046        | <a href="#">AGB01132</a> | CheY-like receiver domain-containing prote... | CDD | <a href="#">UniProt</a> | <a href="#">Pfam</a> | <a href="#">InterPro</a> |                     |
| Metfor_0405        | <a href="#">AGB01478</a> | PAS domain S-box [Methanoregula formicica ... | CDD | <a href="#">UniProt</a> | <a href="#">Pfam</a> | <a href="#">InterPro</a> |                     |
| Metfor_1064        | <a href="#">AGB02113</a> | CheY-like receiver domain-containing prote... | CDD | <a href="#">UniProt</a> | <a href="#">Pfam</a> | <a href="#">InterPro</a> |                     |
| Metfor_1100        | <a href="#">AGB02148</a> | PAS domain S-box [Methanoregula formicica ... | CDD | <a href="#">UniProt</a> | <a href="#">Pfam</a> | <a href="#">InterPro</a> |                     |
| Metfor_1729        | <a href="#">AGB02756</a> | PAS domain S-box [Methanoregula formicica ... | CDD | <a href="#">UniProt</a> | <a href="#">Pfam</a> | <a href="#">InterPro</a> |                     |
| Metfor_2195        | <a href="#">AGB03201</a> | CheY-like receiver domain-containing prote... | CDD | <a href="#">UniProt</a> | <a href="#">Pfam</a> | <a href="#">InterPro</a> |                     |
| Metfor_2227        | <a href="#">AGB03232</a> | PAS domain S-box [Methanoregula formicica ... | CDD | <a href="#">UniProt</a> | <a href="#">Pfam</a> | <a href="#">InterPro</a> |                     |
| Metfor_2717        | <a href="#">AGB03702</a> | PAS domain S-box [Methanoregula formicica ... | CDD | <a href="#">UniProt</a> | <a href="#">Pfam</a> | <a href="#">InterPro</a> |                     |
| <b>REC-wHTH</b>    |                          |                                               |     |                         |                      |                          |                     |
| Metfor_2800        | <a href="#">AGB03783</a> | response regulator with CheY-like receiver... | CDD | <a href="#">UniProt</a> | <a href="#">Pfam</a> | <a href="#">InterPro</a> |                     |
| <b>Other RRs</b>   |                          |                                               |     |                         |                      |                          |                     |
| Metfor_1023        | <a href="#">AGB02074</a> | response regulator with CheY-like receiver... | CDD | <a href="#">UniProt</a> | <a href="#">Pfam</a> | <a href="#">InterPro</a> | (REC-MetOD2)        |
| Metfor_1024        | <a href="#">AGB02075</a> | response regulator containing a CheY-like ... | CDD | <a href="#">UniProt</a> | <a href="#">Pfam</a> | <a href="#">InterPro</a> | (REC-MetOD2)        |
| Metfor_1444        | <a href="#">AGB02479</a> | response regulator containing a CheY-like ... | CDD | <a href="#">UniProt</a> | <a href="#">Pfam</a> | <a href="#">InterPro</a> | (MetOD3-REC-MetOD2) |
| Metfor_1899        | <a href="#">AGB02918</a> | response regulator containing a CheY-like ... | CDD | <a href="#">UniProt</a> | <a href="#">Pfam</a> | <a href="#">InterPro</a> | (MetOD5-REC)        |
| Metfor_2262        | <a href="#">AGB03267</a> | response regulator with CheY-like receiver... | CDD | <a href="#">UniProt</a> | <a href="#">Pfam</a> | <a href="#">InterPro</a> | (REC-Smc)           |

### [Methanosaeta concilii GP6](#)

#### Hybrid HisK



|                  |                          |                                               |                     |                         |                      |                                            |
|------------------|--------------------------|-----------------------------------------------|---------------------|-------------------------|----------------------|--------------------------------------------|
| MCON_0550        | <a href="#">AEB67389</a> | two-component hybrid sensor and regulator ... | <a href="#">CDD</a> | <a href="#">UniProt</a> | <a href="#">Pfam</a> | <a href="#">InterPro</a>                   |
| MCON_1408        | <a href="#">AEB68077</a> | multi-sensor hybrid histidine kinase [Meth... | <a href="#">CDD</a> | <a href="#">UniProt</a> | <a href="#">Pfam</a> | <a href="#">InterPro</a>                   |
| MCON_1632        | <a href="#">AEB68259</a> | signal transduction histidine-protein kina... | <a href="#">CDD</a> | <a href="#">UniProt</a> | <a href="#">Pfam</a> | <a href="#">InterPro</a>                   |
| MCON_1639        | <a href="#">AEB68265</a> | multi-sensor hybrid histidine kinase [Meth... | <a href="#">CDD</a> | <a href="#">UniProt</a> | <a href="#">Pfam</a> | <a href="#">InterPro</a>                   |
| MCON_2222        | <a href="#">AEB68733</a> | two-component hybrid sensor and regulator ... | <a href="#">CDD</a> | <a href="#">UniProt</a> | <a href="#">Pfam</a> | <a href="#">InterPro</a>                   |
| MCON_2375        | <a href="#">AEB68840</a> | two-component hybrid sensor and regulator ... | <a href="#">CDD</a> | <a href="#">UniProt</a> | <a href="#">Pfam</a> | <a href="#">InterPro</a>                   |
| MCON_3111        | <a href="#">AEB69416</a> | two-component hybrid sensor and regulator ... | <a href="#">CDD</a> | <a href="#">UniProt</a> | <a href="#">Pfam</a> | <a href="#">InterPro</a>                   |
| MCON_3220        | <a href="#">AEB69502</a> | histidine-protein kinase [Methanosaeta con... | <a href="#">CDD</a> | <a href="#">UniProt</a> | <a href="#">Pfam</a> | <a href="#">InterPro</a>                   |
| <b>REC only</b>  |                          |                                               |                     |                         |                      |                                            |
| MCON_0419        | <a href="#">AEB67278</a> | response regulator receiver domain protein... | <a href="#">CDD</a> | <a href="#">UniProt</a> | <a href="#">Pfam</a> | <a href="#">InterPro</a>                   |
| MCON_1876        | <a href="#">AEB68464</a> | two-component hybrid sensor and regulator ... | <a href="#">CDD</a> | <a href="#">UniProt</a> | <a href="#">Pfam</a> | <a href="#">InterPro</a>                   |
| MCON_2134        | <a href="#">AEB68665</a> | response regulator receiver domain protein... | <a href="#">CDD</a> | <a href="#">UniProt</a> | <a href="#">Pfam</a> | <a href="#">InterPro</a>                   |
| <b>Other RRs</b> |                          |                                               |                     |                         |                      |                                            |
| MCON_1506        | <a href="#">AEB68159</a> | response regulator domain with PAS sensor,... | <a href="#">CDD</a> | <a href="#">UniProt</a> | <a href="#">Pfam</a> | <a href="#">InterPro</a> (REC-PAS-GAF-xxx) |

#### Methanosaeta harundinacea 6Ac

|                     |                          |                                               |                     |                         |                      |                                             |
|---------------------|--------------------------|-----------------------------------------------|---------------------|-------------------------|----------------------|---------------------------------------------|
| <b>HisK, no REC</b> |                          |                                               |                     |                         |                      |                                             |
| Mhar_0446           | <a href="#">AET63831</a> | Multi-sensor signal transduction histidini... | <a href="#">CDD</a> | <a href="#">UniProt</a> | <a href="#">Pfam</a> | <a href="#">InterPro</a>                    |
| Mhar_1766           | <a href="#">AET65124</a> | PAS/PAC sensor signal transduction histid ... | <a href="#">CDD</a> | <a href="#">UniProt</a> | <a href="#">Pfam</a> | <a href="#">InterPro</a>                    |
| <b>REC only</b>     |                          |                                               |                     |                         |                      |                                             |
| Mhar_0447           | <a href="#">AET63832</a> | FilR2, methanogenesis response regulator p... | <a href="#">CDD</a> | <a href="#">UniProt</a> | <a href="#">Pfam</a> | <a href="#">InterPro</a>                    |
| Mhar_1520           | <a href="#">AET64882</a> | Response regulator receiver protein [Metha... | <a href="#">CDD</a> | <a href="#">UniProt</a> | <a href="#">Pfam</a> | <a href="#">InterPro</a>                    |
| <b>REC-HisK</b>     |                          |                                               |                     |                         |                      |                                             |
| Mhar_0935           | <a href="#">AET64306</a> | Multi-sensor signal transduction histidine... | <a href="#">CDD</a> | <a href="#">UniProt</a> | <a href="#">Pfam</a> | <a href="#">InterPro</a>                    |
| <b>REC-GAF-PAS</b>  |                          |                                               |                     |                         |                      |                                             |
| Mhar_2042           | <a href="#">AET65398</a> | Multi-sensor signal transduction histidine... | <a href="#">CDD</a> | <a href="#">UniProt</a> | <a href="#">Pfam</a> | <a href="#">InterPro</a>                    |
| <b>Other RRs</b>    |                          |                                               |                     |                         |                      |                                             |
| Mhar_0445           | <a href="#">AET63830</a> | FliR1, transcriptional regulator of metano... | <a href="#">CDD</a> | <a href="#">UniProt</a> | <a href="#">Pfam</a> | <a href="#">InterPro</a> (wHTH-DUF1724-REC) |
| Mhar_0169           | <a href="#">AET63560</a> | Response regulator domain with PAS sensor ... | <a href="#">CDD</a> | <a href="#">UniProt</a> | <a href="#">Pfam</a> | <a href="#">InterPro</a> (REC-PAS-xGAF)     |

#### Methanosaeta thermophila PT

|                     |                          |                                               |                     |                         |                      |                                      |
|---------------------|--------------------------|-----------------------------------------------|---------------------|-------------------------|----------------------|--------------------------------------|
| <b>HisK, no REC</b> |                          |                                               |                     |                         |                      |                                      |
| Mthe_0065           | <a href="#">ABK13867</a> | PAS/PAC sensor signal transduction histidi... | <a href="#">CDD</a> | <a href="#">UniProt</a> | <a href="#">Pfam</a> | <a href="#">InterPro</a>             |
| Mthe_0630           | <a href="#">ABK14421</a> | multi-sensor signal transduction histidine... | <a href="#">CDD</a> | <a href="#">UniProt</a> | <a href="#">Pfam</a> | <a href="#">InterPro</a>             |
| Mthe_1493           | <a href="#">ABK15265</a> | PAS/PAC sensor signal transduction histidi... | <a href="#">CDD</a> | <a href="#">UniProt</a> | <a href="#">Pfam</a> | <a href="#">InterPro</a>             |
| Mthe_1517           | <a href="#">ABK15289</a> | integral membrane sensor signal transducti... | <a href="#">CDD</a> | <a href="#">UniProt</a> | <a href="#">Pfam</a> | <a href="#">InterPro</a>             |
| Mthe_1524           | <a href="#">ABK15296</a> | integral membrane sensor signal transducti... | <a href="#">CDD</a> | <a href="#">UniProt</a> | <a href="#">Pfam</a> | <a href="#">InterPro</a>             |
| Mthe_1531           | <a href="#">ABK15303</a> | integral membrane sensor signal transducti... | <a href="#">CDD</a> | <a href="#">UniProt</a> | <a href="#">Pfam</a> | <a href="#">InterPro</a>             |
| <b>Hybrid HisK</b>  |                          |                                               |                     |                         |                      |                                      |
| Mthe_0384           | <a href="#">ABK14177</a> | multi-sensor hybrid histidine kinase [Meth... | <a href="#">CDD</a> | <a href="#">UniProt</a> | <a href="#">Pfam</a> | <a href="#">InterPro</a>             |
| <b>REC only</b>     |                          |                                               |                     |                         |                      |                                      |
| Mthe_0064           | <a href="#">ABK13866</a> | response regulator receiver protein [Metha... | <a href="#">CDD</a> | <a href="#">UniProt</a> | <a href="#">Pfam</a> | <a href="#">InterPro</a>             |
| Mthe_0407           | <a href="#">ABK14200</a> | response regulator receiver protein [Metha... | <a href="#">CDD</a> | <a href="#">UniProt</a> | <a href="#">Pfam</a> | <a href="#">InterPro</a>             |
| Mthe_1248           | <a href="#">ABK15027</a> | response regulator receiver protein [Metha... | <a href="#">CDD</a> | <a href="#">UniProt</a> | <a href="#">Pfam</a> | <a href="#">InterPro</a>             |
| <b>Other RRs</b>    |                          |                                               |                     |                         |                      |                                      |
| Mthe_1109           | <a href="#">ABK14892</a> | response regulator receiver protein [Metha... | <a href="#">CDD</a> | <a href="#">UniProt</a> | <a href="#">Pfam</a> | <a href="#">InterPro</a> (REC-HisKA) |

#### Methanosalsum zhilinae DSM 4017

|                     |                          |                                               |                     |                         |                      |                          |
|---------------------|--------------------------|-----------------------------------------------|---------------------|-------------------------|----------------------|--------------------------|
| <b>HisK, no REC</b> |                          |                                               |                     |                         |                      |                          |
| Mzhil_0129          | <a href="#">AEH60009</a> | signal transduction histidine kinase [Meth... | <a href="#">CDD</a> | <a href="#">UniProt</a> | <a href="#">Pfam</a> | <a href="#">InterPro</a> |
| Mzhil_0133          | <a href="#">AEH60013</a> | signal transduction histidine kinase [Meth... | <a href="#">CDD</a> | <a href="#">UniProt</a> | <a href="#">Pfam</a> | <a href="#">InterPro</a> |
| Mzhil_0360          | <a href="#">AEH60236</a> | multi-sensor signal transduction histidine... | <a href="#">CDD</a> | <a href="#">UniProt</a> | <a href="#">Pfam</a> | <a href="#">InterPro</a> |
| Mzhil_0396          | <a href="#">AEH60271</a> | signal transduction histidine kinase [Meth... | <a href="#">CDD</a> | <a href="#">UniProt</a> | <a href="#">Pfam</a> | <a href="#">InterPro</a> |
| Mzhil_0572          | <a href="#">AEH60439</a> | signal transduction histidine kinase [Meth... | <a href="#">CDD</a> | <a href="#">UniProt</a> | <a href="#">Pfam</a> | <a href="#">InterPro</a> |
| Mzhil_0577          | <a href="#">AEH60444</a> | CheA signal transduction histidine kinase ... | <a href="#">CDD</a> | <a href="#">UniProt</a> | <a href="#">Pfam</a> | <a href="#">InterPro</a> |
| Mzhil_0608          | <a href="#">AEH60475</a> | signal transduction histidine kinase [Meth... | <a href="#">CDD</a> | <a href="#">UniProt</a> | <a href="#">Pfam</a> | <a href="#">InterPro</a> |
| Mzhil_0638          | <a href="#">AEH60505</a> | signal transduction histidine kinase [Meth... | <a href="#">CDD</a> | <a href="#">UniProt</a> | <a href="#">Pfam</a> | <a href="#">InterPro</a> |
| Mzhil_0670          | <a href="#">AEH60537</a> | multi-sensor signal transduction histidine... | <a href="#">CDD</a> | <a href="#">UniProt</a> | <a href="#">Pfam</a> | <a href="#">InterPro</a> |
| Mzhil_0839          | <a href="#">AEH60701</a> | signal transduction histidine kinase [Meth... | <a href="#">CDD</a> | <a href="#">UniProt</a> | <a href="#">Pfam</a> | <a href="#">InterPro</a> |
| Mzhil_0850          | <a href="#">AEH60712</a> | PAS/PAC sensor signal transduction histidi... | <a href="#">CDD</a> | <a href="#">UniProt</a> | <a href="#">Pfam</a> | <a href="#">InterPro</a> |
| Mzhil_0892          | <a href="#">AEH60754</a> | PAS/PAC sensor signal transduction histidi... | <a href="#">CDD</a> | <a href="#">UniProt</a> | <a href="#">Pfam</a> | <a href="#">InterPro</a> |
| Mzhil_0893          | <a href="#">AEH60755</a> | PAS/PAC sensor signal transduction histidi... | <a href="#">CDD</a> | <a href="#">UniProt</a> | <a href="#">Pfam</a> | <a href="#">InterPro</a> |
| Mzhil_0910          | <a href="#">AEH60772</a> | signal transduction histidine kinase [Meth... | <a href="#">CDD</a> | <a href="#">UniProt</a> | <a href="#">Pfam</a> | <a href="#">InterPro</a> |
| Mzhil_0965          | <a href="#">AEH60823</a> | integral membrane sensor signal transducti... | <a href="#">CDD</a> | <a href="#">UniProt</a> | <a href="#">Pfam</a> | <a href="#">InterPro</a> |
| Mzhil_1077          | <a href="#">AEH60933</a> | signal transduction histidine kinase [Meth... | <a href="#">CDD</a> | <a href="#">UniProt</a> | <a href="#">Pfam</a> | <a href="#">InterPro</a> |
| Mzhil_1153          | <a href="#">AEH61009</a> | signal transduction histidine kinase [Meth... | <a href="#">CDD</a> | <a href="#">UniProt</a> | <a href="#">Pfam</a> | <a href="#">InterPro</a> |
| Mzhil_1154          | <a href="#">AEH61010</a> | signal transduction histidine kinase [Meth... | <a href="#">CDD</a> | <a href="#">UniProt</a> | <a href="#">Pfam</a> | <a href="#">InterPro</a> |
| Mzhil_1180          | <a href="#">AEH61036</a> | multi-sensor signal transduction histidine... | <a href="#">CDD</a> | <a href="#">UniProt</a> | <a href="#">Pfam</a> | <a href="#">InterPro</a> |
| Mzhil_1319          | <a href="#">AEH61169</a> | signal transduction histidine kinase [Meth... | <a href="#">CDD</a> | <a href="#">UniProt</a> | <a href="#">Pfam</a> | <a href="#">InterPro</a> |
| Mzhil_1449          | <a href="#">AEH61289</a> | PAS/PAC sensor signal transduction histidi... | <a href="#">CDD</a> | <a href="#">UniProt</a> | <a href="#">Pfam</a> | <a href="#">InterPro</a> |
| Mzhil_1529          | <a href="#">AEH61368</a> | signal transduction histidine kinase [Meth... | <a href="#">CDD</a> | <a href="#">UniProt</a> | <a href="#">Pfam</a> | <a href="#">InterPro</a> |
| Mzhil_1552          | <a href="#">AEH61391</a> | signal transduction histidine kinase [Meth... | <a href="#">CDD</a> | <a href="#">UniProt</a> | <a href="#">Pfam</a> | <a href="#">InterPro</a> |
| Mzhil_1587          | <a href="#">AEH61425</a> | signal transduction histidine kinase [Meth... | <a href="#">CDD</a> | <a href="#">UniProt</a> | <a href="#">Pfam</a> | <a href="#">InterPro</a> |
| Mzhil_1625          | <a href="#">AEH61461</a> | integral membrane sensor signal transducti... | <a href="#">CDD</a> | <a href="#">UniProt</a> | <a href="#">Pfam</a> | <a href="#">InterPro</a> |
| Mzhil_1694          | <a href="#">AEH61529</a> | signal transduction histidine kinase [Meth... | <a href="#">CDD</a> | <a href="#">UniProt</a> | <a href="#">Pfam</a> | <a href="#">InterPro</a> |

|                  |                          |                                               |                     |                         |                      |                                     |
|------------------|--------------------------|-----------------------------------------------|---------------------|-------------------------|----------------------|-------------------------------------|
| Mzhil_1793       | <a href="#">AEH61628</a> | PAS/PAC sensor signal transduction histidi... | <a href="#">CDD</a> | <a href="#">UniProt</a> | <a href="#">Pfam</a> | <a href="#">InterPro</a>            |
| Mzhil_1800       | <a href="#">AEH61635</a> | PAS/PAC sensor signal transduction histidi... | <a href="#">CDD</a> | <a href="#">UniProt</a> | <a href="#">Pfam</a> | <a href="#">InterPro</a>            |
| <b>REC only</b>  |                          |                                               |                     |                         |                      |                                     |
| Mzhil_0575       | <a href="#">AEH60442</a> | response regulator receiver protein [Metha... | <a href="#">CDD</a> | <a href="#">UniProt</a> | <a href="#">Pfam</a> | <a href="#">InterPro</a>            |
| Mzhil_0606       | <a href="#">AEH60473</a> | response regulator receiver protein [Metha... | <a href="#">CDD</a> | <a href="#">UniProt</a> | <a href="#">Pfam</a> | <a href="#">InterPro</a>            |
| Mzhil_0607       | <a href="#">AEH60474</a> | response regulator receiver protein [Metha... | <a href="#">CDD</a> | <a href="#">UniProt</a> | <a href="#">Pfam</a> | <a href="#">InterPro</a>            |
| Mzhil_1530       | <a href="#">AEH61369</a> | response regulator receiver protein [Metha... | <a href="#">CDD</a> | <a href="#">UniProt</a> | <a href="#">Pfam</a> | <a href="#">InterPro</a>            |
| Mzhil_1670       | <a href="#">AEH61505</a> | response regulator receiver protein [Metha... | <a href="#">CDD</a> | <a href="#">UniProt</a> | <a href="#">Pfam</a> | <a href="#">InterPro</a>            |
| <b>REC-CheB</b>  |                          |                                               |                     |                         |                      |                                     |
| Mzhil_0576       | <a href="#">AEH60443</a> | response regulator receiver modulated CheB... | <a href="#">CDD</a> | <a href="#">UniProt</a> | <a href="#">Pfam</a> | <a href="#">InterPro</a>            |
| <b>REC-PAS</b>   |                          |                                               |                     |                         |                      |                                     |
| Mzhil_0343       | <a href="#">AEH60219</a> | putative PAS/PAC sensor protein [Methanosa... | <a href="#">CDD</a> | <a href="#">UniProt</a> | <a href="#">Pfam</a> | <a href="#">InterPro</a>            |
| Mzhil_0637       | <a href="#">AEH60504</a> | putative PAS/PAC sensor protein [Methanosa... | <a href="#">CDD</a> | <a href="#">UniProt</a> | <a href="#">Pfam</a> | <a href="#">InterPro</a>            |
| <b>Other RRs</b> |                          |                                               |                     |                         |                      |                                     |
| Mzhil_1671       | <a href="#">AEH61506</a> | response regulator receiver protein [Metha... | <a href="#">CDD</a> | <a href="#">UniProt</a> | <a href="#">Pfam</a> | <a href="#">InterPro</a> (KaiC-REC) |

---

### Methanosarcina acetivorans C2A

#### HisK, no REC

|         |                          |                                               |                     |                         |                      |                          |
|---------|--------------------------|-----------------------------------------------|---------------------|-------------------------|----------------------|--------------------------|
| MA_0014 | <a href="#">AAM03468</a> | chemotaxis sensor histidine kinase [Methan... | <a href="#">CDD</a> | <a href="#">UniProt</a> | <a href="#">Pfam</a> | <a href="#">InterPro</a> |
| MA_0203 | <a href="#">AAM03656</a> | signal-transducing histidine kinase [Metha... | <a href="#">CDD</a> | <a href="#">UniProt</a> | <a href="#">Pfam</a> | <a href="#">InterPro</a> |
| MA_0490 | <a href="#">AAM03934</a> | sensory transduction histidine kinase [Met... | <a href="#">CDD</a> | <a href="#">UniProt</a> | <a href="#">Pfam</a> | <a href="#">InterPro</a> |
| MA_0551 | <a href="#">AAM03995</a> | sensory transduction histidine kinase [Met... | <a href="#">CDD</a> | <a href="#">UniProt</a> | <a href="#">Pfam</a> | <a href="#">InterPro</a> |
| MA_0552 | <a href="#">AAM03996</a> | sensory transduction histidine kinase [Met... | <a href="#">CDD</a> | <a href="#">UniProt</a> | <a href="#">Pfam</a> | <a href="#">InterPro</a> |
| MA_0619 | <a href="#">AAM04062</a> | sensory transduction histidine kinase [Met... | <a href="#">CDD</a> | <a href="#">UniProt</a> | <a href="#">Pfam</a> | <a href="#">InterPro</a> |
| MA_0620 | <a href="#">AAM04063</a> | sensory transduction histidine kinase [Met... | <a href="#">CDD</a> | <a href="#">UniProt</a> | <a href="#">Pfam</a> | <a href="#">InterPro</a> |
| MA_0758 | <a href="#">AAM04198</a> | sensory transduction histidine kinase [Met... | <a href="#">CDD</a> | <a href="#">UniProt</a> | <a href="#">Pfam</a> | <a href="#">InterPro</a> |
| MA_0759 | <a href="#">AAM04199</a> | sensory transduction histidine kinase [Met... | <a href="#">CDD</a> | <a href="#">UniProt</a> | <a href="#">Pfam</a> | <a href="#">InterPro</a> |
| MA_0777 | <a href="#">AAM04216</a> | signal-transducing histidine kinase [Metha... | <a href="#">CDD</a> | <a href="#">UniProt</a> | <a href="#">Pfam</a> | <a href="#">InterPro</a> |
| MA_0863 | <a href="#">AAM04302</a> | sensory transduction histidine kinase [Met... | <a href="#">CDD</a> | <a href="#">UniProt</a> | <a href="#">Pfam</a> | <a href="#">InterPro</a> |
| MA_0970 | <a href="#">AAM04402</a> | sensory transduction histidine kinase [Met... | <a href="#">CDD</a> | <a href="#">UniProt</a> | <a href="#">Pfam</a> | <a href="#">InterPro</a> |
| MA_1149 | <a href="#">AAM04570</a> | sensory transduction histidine kinase [Met... | <a href="#">CDD</a> | <a href="#">UniProt</a> | <a href="#">Pfam</a> | <a href="#">InterPro</a> |
| MA_1270 | <a href="#">AAM04689</a> | sensory transduction histidine kinase [Met... | <a href="#">CDD</a> | <a href="#">UniProt</a> | <a href="#">Pfam</a> | <a href="#">InterPro</a> |
| MA_1274 | <a href="#">AAM04693</a> | sensory transduction histidine kinase [Met... | <a href="#">CDD</a> | <a href="#">UniProt</a> | <a href="#">Pfam</a> | <a href="#">InterPro</a> |
| MA_1322 | <a href="#">AAM04738</a> | sensory transduction histidine kinase [Met... | <a href="#">CDD</a> | <a href="#">UniProt</a> | <a href="#">Pfam</a> | <a href="#">InterPro</a> |
| MA_1463 | <a href="#">AAM04877</a> | sensory transduction histidine kinase [Met... | <a href="#">CDD</a> | <a href="#">UniProt</a> | <a href="#">Pfam</a> | <a href="#">InterPro</a> |
| MA_1470 | <a href="#">AAM04884</a> | sensory transduction histidine kinase [Met... | <a href="#">CDD</a> | <a href="#">UniProt</a> | <a href="#">Pfam</a> | <a href="#">InterPro</a> |
| MA_1627 | <a href="#">AAM05037</a> | sensory transduction histidine kinase [Met... | <a href="#">CDD</a> | <a href="#">UniProt</a> | <a href="#">Pfam</a> | <a href="#">InterPro</a> |
| MA_1628 | <a href="#">AAM05038</a> | sensory transduction histidine kinase [Met... | <a href="#">CDD</a> | <a href="#">UniProt</a> | <a href="#">Pfam</a> | <a href="#">InterPro</a> |
| MA_1630 | <a href="#">AAM05040</a> | sensory transduction histidine kinase [Met... | <a href="#">CDD</a> | <a href="#">UniProt</a> | <a href="#">Pfam</a> | <a href="#">InterPro</a> |
| MA_1645 | <a href="#">AAM05053</a> | sensory transduction histidine kinase [Met... | <a href="#">CDD</a> | <a href="#">UniProt</a> | <a href="#">Pfam</a> | <a href="#">InterPro</a> |
| MA_1646 | <a href="#">AAM05054</a> | sensory transduction histidine kinase [Met... | <a href="#">CDD</a> | <a href="#">UniProt</a> | <a href="#">Pfam</a> | <a href="#">InterPro</a> |
| MA_1704 | <a href="#">AAM05111</a> | sensory transduction histidine kinase [Met... | <a href="#">CDD</a> | <a href="#">UniProt</a> | <a href="#">Pfam</a> | <a href="#">InterPro</a> |
| MA_1739 | <a href="#">AAM05146</a> | sensory transduction histidine kinase [Met... | <a href="#">CDD</a> | <a href="#">UniProt</a> | <a href="#">Pfam</a> | <a href="#">InterPro</a> |
| MA_1844 | <a href="#">AAM05249</a> | sensory transduction histidine kinase [Met... | <a href="#">CDD</a> | <a href="#">UniProt</a> | <a href="#">Pfam</a> | <a href="#">InterPro</a> |
| MA_1878 | <a href="#">AAM05283</a> | sensory transduction histidine kinase [Met... | <a href="#">CDD</a> | <a href="#">UniProt</a> | <a href="#">Pfam</a> | <a href="#">InterPro</a> |
| MA_1957 | <a href="#">AAM05360</a> | sensory transduction histidine kinase [Met... | <a href="#">CDD</a> | <a href="#">UniProt</a> | <a href="#">Pfam</a> | <a href="#">InterPro</a> |
| MA_1991 | <a href="#">AAM05394</a> | sensory transduction histidine kinase [Met... | <a href="#">CDD</a> | <a href="#">UniProt</a> | <a href="#">Pfam</a> | <a href="#">InterPro</a> |
| MA_2082 | <a href="#">AAM05482</a> | sensory transduction histidine kinase [Met... | <a href="#">CDD</a> | <a href="#">UniProt</a> | <a href="#">Pfam</a> | <a href="#">InterPro</a> |
| MA_2266 | <a href="#">AAM05659</a> | sensory transduction histidine kinase [Met... | <a href="#">CDD</a> | <a href="#">UniProt</a> | <a href="#">Pfam</a> | <a href="#">InterPro</a> |
| MA_2294 | <a href="#">AAM05687</a> | sensory transduction histidine kinase [Met... | <a href="#">CDD</a> | <a href="#">UniProt</a> | <a href="#">Pfam</a> | <a href="#">InterPro</a> |
| MA_2348 | <a href="#">AAM05738</a> | sensory transduction histidine kinase [Met... | <a href="#">CDD</a> | <a href="#">UniProt</a> | <a href="#">Pfam</a> | <a href="#">InterPro</a> |
| MA_2553 | <a href="#">AAM05935</a> | sensory transduction histidine kinase [Met... | <a href="#">CDD</a> | <a href="#">UniProt</a> | <a href="#">Pfam</a> | <a href="#">InterPro</a> |
| MA_2555 | <a href="#">AAM05937</a> | sensory transduction histidine kinase [Met... | <a href="#">CDD</a> | <a href="#">UniProt</a> | <a href="#">Pfam</a> | <a href="#">InterPro</a> |
| MA_2732 | <a href="#">AAM06111</a> | sensory transduction histidine kinase [Met... | <a href="#">CDD</a> | <a href="#">UniProt</a> | <a href="#">Pfam</a> | <a href="#">InterPro</a> |
| MA_2757 | <a href="#">AAM06135</a> | sensory transduction histidine kinase [Met... | <a href="#">CDD</a> | <a href="#">UniProt</a> | <a href="#">Pfam</a> | <a href="#">InterPro</a> |
| MA_2784 | <a href="#">AAM06162</a> | sensory transduction histidine kinase [Met... | <a href="#">CDD</a> | <a href="#">UniProt</a> | <a href="#">Pfam</a> | <a href="#">InterPro</a> |
| MA_2890 | <a href="#">AAM06267</a> | sensory transduction histidine kinase [Met... | <a href="#">CDD</a> | <a href="#">UniProt</a> | <a href="#">Pfam</a> | <a href="#">InterPro</a> |
| MA_3066 | <a href="#">AAM06439</a> | chemotaxis sensor histidine kinase [Methan... | <a href="#">CDD</a> | <a href="#">UniProt</a> | <a href="#">Pfam</a> | <a href="#">InterPro</a> |
| MA_3346 | <a href="#">AAM06715</a> | sensory transduction histidine kinase [Met... | <a href="#">CDD</a> | <a href="#">UniProt</a> | <a href="#">Pfam</a> | <a href="#">InterPro</a> |
| MA_3368 | <a href="#">AAM06737</a> | sensory transduction histidine kinase [Met... | <a href="#">CDD</a> | <a href="#">UniProt</a> | <a href="#">Pfam</a> | <a href="#">InterPro</a> |
| MA_3370 | <a href="#">AAM06739</a> | sensory transduction histidine kinase [Met... | <a href="#">CDD</a> | <a href="#">UniProt</a> | <a href="#">Pfam</a> | <a href="#">InterPro</a> |
| MA_3481 | <a href="#">AAM06847</a> | hypothetical protein MA_3481 [Methanosarci... | <a href="#">CDD</a> | <a href="#">UniProt</a> | <a href="#">Pfam</a> | <a href="#">InterPro</a> |
| MA_3543 | <a href="#">AAM06905</a> | sensory transduction histidine kinase [Met... | <a href="#">CDD</a> | <a href="#">UniProt</a> | <a href="#">Pfam</a> | <a href="#">InterPro</a> |
| MA_3962 | <a href="#">AAM07313</a> | sensory transduction histidine kinase [Met... | <a href="#">CDD</a> | <a href="#">UniProt</a> | <a href="#">Pfam</a> | <a href="#">InterPro</a> |
| MA_4026 | <a href="#">AAM07375</a> | sensory transduction histidine kinase [Met... | <a href="#">CDD</a> | <a href="#">UniProt</a> | <a href="#">Pfam</a> | <a href="#">InterPro</a> |
| MA_4561 | <a href="#">AAM07900</a> | sensory transduction histidine kinase [Met... | <a href="#">CDD</a> | <a href="#">UniProt</a> | <a href="#">Pfam</a> | <a href="#">InterPro</a> |

#### Hybrid HisK

|         |                          |                                               |                     |                         |                      |                          |
|---------|--------------------------|-----------------------------------------------|---------------------|-------------------------|----------------------|--------------------------|
| MA_2013 | <a href="#">AAM05416</a> | sensory transduction histidine kinase [Met... | <a href="#">CDD</a> | <a href="#">UniProt</a> | <a href="#">Pfam</a> | <a href="#">InterPro</a> |
| MA_2256 | <a href="#">AAM05650</a> | sensory transduction histidine kinase [Met... | <a href="#">CDD</a> | <a href="#">UniProt</a> | <a href="#">Pfam</a> | <a href="#">InterPro</a> |
| MA_4377 | <a href="#">AAM07719</a> | sensory transduction histidine kinase [Met... | <a href="#">CDD</a> | <a href="#">UniProt</a> | <a href="#">Pfam</a> | <a href="#">InterPro</a> |

#### REC only

|         |                          |                                               |                     |                         |                      |                          |
|---------|--------------------------|-----------------------------------------------|---------------------|-------------------------|----------------------|--------------------------|
| MA_0016 | <a href="#">AAM03470</a> | chemotaxis response regulator [Methanosarc... | <a href="#">CDD</a> | <a href="#">UniProt</a> | <a href="#">Pfam</a> | <a href="#">InterPro</a> |
| MA_0018 | <a href="#">AAM03472</a> | response regulator receiver [Methanosarcin... | <a href="#">CDD</a> | <a href="#">UniProt</a> | <a href="#">Pfam</a> | <a href="#">InterPro</a> |
| MA_1268 | <a href="#">AAM04687</a> | response regulator receiver [Methanosarcin... | <a href="#">CDD</a> | <a href="#">UniProt</a> | <a href="#">Pfam</a> | <a href="#">InterPro</a> |
| MA_1269 | <a href="#">AAM04688</a> | response regulator receiver [Methanosarcin... | <a href="#">CDD</a> | <a href="#">UniProt</a> | <a href="#">Pfam</a> | <a href="#">InterPro</a> |
| MA_1366 | <a href="#">AAM04782</a> | response regulator receiver [Methanosarcin... | <a href="#">CDD</a> | <a href="#">UniProt</a> | <a href="#">Pfam</a> | <a href="#">InterPro</a> |
| MA_1468 | <a href="#">AAM04882</a> | response regulator receiver [Methanosarcin... | <a href="#">CDD</a> | <a href="#">UniProt</a> | <a href="#">Pfam</a> | <a href="#">InterPro</a> |
| MA_1469 | <a href="#">AAM04883</a> | response regulator receiver [Methanosarcin... | <a href="#">CDD</a> | <a href="#">UniProt</a> | <a href="#">Pfam</a> | <a href="#">InterPro</a> |

|                   |                          |                                               |     |                         |                      |                                       |
|-------------------|--------------------------|-----------------------------------------------|-----|-------------------------|----------------------|---------------------------------------|
| MA_2012           | <a href="#">AAM05415</a> | response regulator receiver [Methanosarcin... | CDD | <a href="#">UniProt</a> | <a href="#">Pfam</a> | <a href="#">InterPro</a>              |
| MA_2861           | <a href="#">AAM06240</a> | response regulator receiver [Methanosarcin... | CDD | <a href="#">UniProt</a> | <a href="#">Pfam</a> | <a href="#">InterPro</a>              |
| MA_3068           | <a href="#">AAM06441</a> | chemotaxis response regulator [Methanosarc... | CDD | <a href="#">UniProt</a> | <a href="#">Pfam</a> | <a href="#">InterPro</a>              |
| MA_4376           | <a href="#">AAM07718</a> | response regulator receiver [Methanosarcin... | CDD | <a href="#">UniProt</a> | <a href="#">Pfam</a> | <a href="#">InterPro</a>              |
| MA_4671           | <a href="#">AAM05649</a> | response regulator receiver [Methanosarcin... | CDD | <a href="#">UniProt</a> | <a href="#">Pfam</a> | <a href="#">InterPro</a>              |
| <b>REC-HisK</b>   |                          |                                               |     |                         |                      |                                       |
| MA_1267           | <a href="#">AAM04686</a> | sensory transduction histidine kinase [Met... | CDD | <a href="#">UniProt</a> | <a href="#">Pfam</a> | <a href="#">InterPro</a>              |
| MA_3405           | <a href="#">AAM06772</a> | sensory transduction histidine kinase [Met... | CDD | <a href="#">UniProt</a> | <a href="#">Pfam</a> | <a href="#">InterPro</a>              |
| <b>REC-CheB</b>   |                          |                                               |     |                         |                      |                                       |
| MA_0015           | <a href="#">AAM03469</a> | chemotaxis protein-glutamate methylesteras... | CDD | <a href="#">UniProt</a> | <a href="#">Pfam</a> | <a href="#">InterPro</a>              |
| MA_3067           | <a href="#">AAM06440</a> | chemotaxis protein-glutamate methylesteras... | CDD | <a href="#">UniProt</a> | <a href="#">Pfam</a> | <a href="#">InterPro</a>              |
| <b>REC-MetOD1</b> |                          |                                               |     |                         |                      |                                       |
| MA_2445           | <a href="#">AAM05831</a> | response regulator receiver [Methanosarcin... | CDD | <a href="#">UniProt</a> | <a href="#">Pfam</a> | <a href="#">InterPro</a> (REC-MetOD1) |

### Methanosarcina barkeri str. fusaro

#### **HisK, no REC**

|            |                          |                                               |     |                         |                      |                          |
|------------|--------------------------|-----------------------------------------------|-----|-------------------------|----------------------|--------------------------|
| Mbar_A0404 | <a href="#">AAZ69387</a> | hypothetical protein Mbar_A0404 [Methanosa... | CDD | <a href="#">UniProt</a> | <a href="#">Pfam</a> | <a href="#">InterPro</a> |
| Mbar_A0679 | <a href="#">AAZ69658</a> | sensory transduction histidine kinase [Met... | CDD | <a href="#">UniProt</a> | <a href="#">Pfam</a> | <a href="#">InterPro</a> |
| Mbar_A0815 | <a href="#">AAZ69792</a> | hypothetical protein Mbar_A0815 [Methanosa... | CDD | <a href="#">UniProt</a> | <a href="#">Pfam</a> | <a href="#">InterPro</a> |
| Mbar_A0984 | <a href="#">AAZ69955</a> | chemotaxis sensor histidine kinase [Methan... | CDD | <a href="#">UniProt</a> | <a href="#">Pfam</a> | <a href="#">InterPro</a> |
| Mbar_A1483 | <a href="#">AAZ70438</a> | sensory transduction histidine kinase [Met... | CDD | <a href="#">UniProt</a> | <a href="#">Pfam</a> | <a href="#">InterPro</a> |
| Mbar_A1535 | <a href="#">AAZ70485</a> | sensory transduction histidine kinase [Met... | CDD | <a href="#">UniProt</a> | <a href="#">Pfam</a> | <a href="#">InterPro</a> |
| Mbar_A1666 | <a href="#">AAZ70610</a> | sensory transduction histidine kinase [Met... | CDD | <a href="#">UniProt</a> | <a href="#">Pfam</a> | <a href="#">InterPro</a> |
| Mbar_A1687 | <a href="#">AAZ70629</a> | signal-transducing histidine kinase [Metha... | CDD | <a href="#">UniProt</a> | <a href="#">Pfam</a> | <a href="#">InterPro</a> |
| Mbar_A1944 | <a href="#">AAZ70883</a> | signal-transducing histidine kinase [Metha... | CDD | <a href="#">UniProt</a> | <a href="#">Pfam</a> | <a href="#">InterPro</a> |
| Mbar_A2184 | <a href="#">AAZ71112</a> | hypothetical protein Mbar_A2184 [Methanosa... | CDD | <a href="#">UniProt</a> | <a href="#">Pfam</a> | <a href="#">InterPro</a> |
| Mbar_A2362 | <a href="#">AAZ71283</a> | hypothetical protein Mbar_A2362 [Methanosa... | CDD | <a href="#">UniProt</a> | <a href="#">Pfam</a> | <a href="#">InterPro</a> |
| Mbar_A2552 | <a href="#">AAZ71465</a> | sensory transduction histidine kinase [Met... | CDD | <a href="#">UniProt</a> | <a href="#">Pfam</a> | <a href="#">InterPro</a> |
| Mbar_A2594 | <a href="#">AAZ71504</a> | hypothetical protein Mbar_A2594 [Methanosa... | CDD | <a href="#">UniProt</a> | <a href="#">Pfam</a> | <a href="#">InterPro</a> |
| Mbar_A2680 | <a href="#">AAZ71584</a> | sensory transduction histidine kinase [Met... | CDD | <a href="#">UniProt</a> | <a href="#">Pfam</a> | <a href="#">InterPro</a> |
| Mbar_A2691 | <a href="#">AAZ71595</a> | hypothetical protein Mbar_A2691 [Methanosa... | CDD | <a href="#">UniProt</a> | <a href="#">Pfam</a> | <a href="#">InterPro</a> |
| Mbar_A2876 | <a href="#">AAZ71776</a> | sensory transduction histidine kinase [Met... | CDD | <a href="#">UniProt</a> | <a href="#">Pfam</a> | <a href="#">InterPro</a> |
| Mbar_A2907 | <a href="#">AAZ71805</a> | sensory transduction histidine kinase [Met... | CDD | <a href="#">UniProt</a> | <a href="#">Pfam</a> | <a href="#">InterPro</a> |
| Mbar_A2935 | <a href="#">AAZ71830</a> | sensory transduction histidine kinase [Met... | CDD | <a href="#">UniProt</a> | <a href="#">Pfam</a> | <a href="#">InterPro</a> |
| Mbar_A3007 | <a href="#">AAZ71901</a> | two component system histidine kinase [Met... | CDD | <a href="#">UniProt</a> | <a href="#">Pfam</a> | <a href="#">InterPro</a> |
| Mbar_A3036 | <a href="#">AAZ71928</a> | sensory transduction histidine kinase [Met... | CDD | <a href="#">UniProt</a> | <a href="#">Pfam</a> | <a href="#">InterPro</a> |
| Mbar_A3037 | <a href="#">AAZ71929</a> | hypothetical protein Mbar_A3037 [Methanosa... | CDD | <a href="#">UniProt</a> | <a href="#">Pfam</a> | <a href="#">InterPro</a> |
| Mbar_A3250 | <a href="#">AAZ72131</a> | sensory transduction histidine kinase [Met... | CDD | <a href="#">UniProt</a> | <a href="#">Pfam</a> | <a href="#">InterPro</a> |
| Mbar_A3447 | <a href="#">AAZ72320</a> | hypothetical protein Mbar_A3447 [Methanosa... | CDD | <a href="#">UniProt</a> | <a href="#">Pfam</a> | <a href="#">InterPro</a> |
| Mbar_A3538 | <a href="#">AAZ72407</a> | hypothetical protein Mbar_A3538 [Methanosa... | CDD | <a href="#">UniProt</a> | <a href="#">Pfam</a> | <a href="#">InterPro</a> |

#### **Hybrid HisK**

|            |                          |                                               |     |                         |                      |                          |
|------------|--------------------------|-----------------------------------------------|-----|-------------------------|----------------------|--------------------------|
| Mbar_A1052 | <a href="#">AAZ70020</a> | sensory transduction histidine kinase [Met... | CDD | <a href="#">UniProt</a> | <a href="#">Pfam</a> | <a href="#">InterPro</a> |
|------------|--------------------------|-----------------------------------------------|-----|-------------------------|----------------------|--------------------------|

#### **REC only**

|            |                          |                                                |     |                         |                      |                          |
|------------|--------------------------|------------------------------------------------|-----|-------------------------|----------------------|--------------------------|
| Mbar_A0988 | <a href="#">AAZ69958</a> | response regulator receiver [Methanosarcin...  | CDD | <a href="#">UniProt</a> | <a href="#">Pfam</a> | <a href="#">InterPro</a> |
| Mbar_A0986 | <a href="#">AAZ69957</a> | chemotaxis response regulator [Methanosarci... | CDD | <a href="#">UniProt</a> | <a href="#">Pfam</a> | <a href="#">InterPro</a> |
| Mbar_A1051 | <a href="#">AAZ70019</a> | response regulator receiver [Methanosarcin...  | CDD | <a href="#">UniProt</a> | <a href="#">Pfam</a> | <a href="#">InterPro</a> |
| Mbar_A2388 | <a href="#">AAZ71309</a> | response regulator receiver [Methanosarcin...  | CDD | <a href="#">UniProt</a> | <a href="#">Pfam</a> | <a href="#">InterPro</a> |
| Mbar_A2510 | <a href="#">AAZ71423</a> | transcriptional regulator [Methanosarcina ...  | CDD | <a href="#">UniProt</a> | <a href="#">Pfam</a> | <a href="#">InterPro</a> |
| Mbar_A3248 | <a href="#">AAZ72129</a> | response regulator receiver [Methanosarcin...  | CDD | <a href="#">UniProt</a> | <a href="#">Pfam</a> | <a href="#">InterPro</a> |
| Mbar_A3321 | <a href="#">AAZ72199</a> | chemotaxis protein [Methanosarcina barkeri...  | CDD | <a href="#">UniProt</a> | <a href="#">Pfam</a> | <a href="#">InterPro</a> |
| Mbar_A3448 | <a href="#">AAZ72321</a> | putative transcriptional regulator [Methan...  | CDD | <a href="#">UniProt</a> | <a href="#">Pfam</a> | <a href="#">InterPro</a> |

#### **REC-HisK**

|            |                          |                                               |     |                         |                      |                          |
|------------|--------------------------|-----------------------------------------------|-----|-------------------------|----------------------|--------------------------|
| Mbar_A3247 | <a href="#">AAZ72128</a> | sensory transduction histidine kinase [Met... | CDD | <a href="#">UniProt</a> | <a href="#">Pfam</a> | <a href="#">InterPro</a> |
|------------|--------------------------|-----------------------------------------------|-----|-------------------------|----------------------|--------------------------|

#### **REC-CheB**

|            |                          |                                               |     |                         |                      |                          |
|------------|--------------------------|-----------------------------------------------|-----|-------------------------|----------------------|--------------------------|
| Mbar_A0985 | <a href="#">AAZ69956</a> | chemotaxis protein-glutamate methylesteras... | CDD | <a href="#">UniProt</a> | <a href="#">Pfam</a> | <a href="#">InterPro</a> |
|------------|--------------------------|-----------------------------------------------|-----|-------------------------|----------------------|--------------------------|

#### **wHTH-REC**

|            |                          |                                               |     |                         |                      |                                     |
|------------|--------------------------|-----------------------------------------------|-----|-------------------------|----------------------|-------------------------------------|
| Mbar_A2896 | <a href="#">AAZ71794</a> | transcriptional regulator [Methanosarcina ... | CDD | <a href="#">UniProt</a> | <a href="#">Pfam</a> | <a href="#">InterPro</a> (wHTH-REC) |
|------------|--------------------------|-----------------------------------------------|-----|-------------------------|----------------------|-------------------------------------|

#### **REC-MetOD1**

|            |                          |                                               |     |                         |                      |                                       |
|------------|--------------------------|-----------------------------------------------|-----|-------------------------|----------------------|---------------------------------------|
| Mbar_A3109 | <a href="#">AAZ71996</a> | response regulator receiver [Methanosarcin... | CDD | <a href="#">UniProt</a> | <a href="#">Pfam</a> | <a href="#">InterPro</a> (REC-MetOD1) |
|------------|--------------------------|-----------------------------------------------|-----|-------------------------|----------------------|---------------------------------------|

### Methanosarcina horonobensis

#### **HisK, no REC**

|            |                          |                                               |     |                         |                      |                          |
|------------|--------------------------|-----------------------------------------------|-----|-------------------------|----------------------|--------------------------|
| MSHOH_0263 | <a href="#">AKB76746</a> | sensory transduction histidine kinase [Met... | CDD | <a href="#">UniProt</a> | <a href="#">Pfam</a> | <a href="#">InterPro</a> |
| MSHOH_0448 | <a href="#">AKB76931</a> | sensory transduction histidine kinase [Met... | CDD | <a href="#">UniProt</a> | <a href="#">Pfam</a> | <a href="#">InterPro</a> |
| MSHOH_0506 | <a href="#">AKB76989</a> | sensory transduction histidine kinase [Met... | CDD | <a href="#">UniProt</a> | <a href="#">Pfam</a> | <a href="#">InterPro</a> |
| MSHOH_0621 | <a href="#">AKB77104</a> | sensory transduction histidine kinase [Met... | CDD | <a href="#">UniProt</a> | <a href="#">Pfam</a> | <a href="#">InterPro</a> |
| MSHOH_0624 | <a href="#">AKB77107</a> | sensory transduction histidine kinase [Met... | CDD | <a href="#">UniProt</a> | <a href="#">Pfam</a> | <a href="#">InterPro</a> |
| MSHOH_0639 | <a href="#">AKB77122</a> | sensory transduction histidine kinase [Met... | CDD | <a href="#">UniProt</a> | <a href="#">Pfam</a> | <a href="#">InterPro</a> |
| MSHOH_0998 | <a href="#">AKB77481</a> | sensory transduction histidine kinase [Met... | CDD | <a href="#">UniProt</a> | <a href="#">Pfam</a> | <a href="#">InterPro</a> |
| MSHOH_1036 | <a href="#">AKB77519</a> | Sensory transduction histidine kinase [Met... | CDD | <a href="#">UniProt</a> | <a href="#">Pfam</a> | <a href="#">InterPro</a> |
| MSHOH_1037 | <a href="#">AKB77520</a> | sensory transduction histidine kinase [Met... | CDD | <a href="#">UniProt</a> | <a href="#">Pfam</a> | <a href="#">InterPro</a> |
| MSHOH_1041 | <a href="#">AKB77524</a> | sensory transduction histidine kinase [Met... | CDD | <a href="#">UniProt</a> | <a href="#">Pfam</a> | <a href="#">InterPro</a> |
| MSHOH_1042 | <a href="#">AKB77525</a> | sensory transduction histidine kinase [Met... | CDD | <a href="#">UniProt</a> | <a href="#">Pfam</a> | <a href="#">InterPro</a> |
| MSHOH_1063 | <a href="#">AKB77546</a> | sensory transduction histidine kinase [Met... | CDD | <a href="#">UniProt</a> | <a href="#">Pfam</a> | <a href="#">InterPro</a> |
| MSHOH_1129 | <a href="#">AKB77612</a> | sensory transduction histidine kinase [Met... | CDD | <a href="#">UniProt</a> | <a href="#">Pfam</a> | <a href="#">InterPro</a> |
| MSHOH_1151 | <a href="#">AKB77634</a> | Signal transduction histidine kinase CheA ... | CDD | <a href="#">UniProt</a> | <a href="#">Pfam</a> | <a href="#">InterPro</a> |
| MSHOH_1339 | <a href="#">AKB77822</a> | sensory transduction histidine kinase [Met... | CDD | <a href="#">UniProt</a> | <a href="#">Pfam</a> | <a href="#">InterPro</a> |

|                    |                          |                                               |     |                         |                      |                          |
|--------------------|--------------------------|-----------------------------------------------|-----|-------------------------|----------------------|--------------------------|
| MSHOH_1364         | <a href="#">AKB77847</a> | sensory transduction histidine kinase [Met... | CDD | <a href="#">UniProt</a> | <a href="#">Pfam</a> | <a href="#">InterPro</a> |
| MSHOH_1404         | <a href="#">AKB77887</a> | Sensory transduction histidine kinase [Met... | CDD | <a href="#">UniProt</a> | <a href="#">Pfam</a> | <a href="#">InterPro</a> |
| MSHOH_1423         | <a href="#">AKB77906</a> | Sensory transduction histidine kinase [Met... | CDD | <a href="#">UniProt</a> | <a href="#">Pfam</a> | <a href="#">InterPro</a> |
| MSHOH_1428         | <a href="#">AKB77911</a> | Sensory transduction histidine kinase [Met... | CDD | <a href="#">UniProt</a> | <a href="#">Pfam</a> | <a href="#">InterPro</a> |
| MSHOH_1508         | <a href="#">AKB77991</a> | hypothetical protein MSHOH_1508 [Methanosa... | CDD | <a href="#">UniProt</a> | <a href="#">Pfam</a> | <a href="#">InterPro</a> |
| MSHOH_1511         | <a href="#">AKB77994</a> | sensory transduction histidine kinase [Met... | CDD | <a href="#">UniProt</a> | <a href="#">Pfam</a> | <a href="#">InterPro</a> |
| MSHOH_1522         | <a href="#">AKB78005</a> | sensory transduction histidine kinase [Met... | CDD | <a href="#">UniProt</a> | <a href="#">Pfam</a> | <a href="#">InterPro</a> |
| MSHOH_1535         | <a href="#">AKB78018</a> | hypothetical protein MSHOH_1535 [Methanosa... | CDD | <a href="#">UniProt</a> | <a href="#">Pfam</a> | <a href="#">InterPro</a> |
| MSHOH_1544         | <a href="#">AKB78027</a> | sensory transduction histidine kinase [Met... | CDD | <a href="#">UniProt</a> | <a href="#">Pfam</a> | <a href="#">InterPro</a> |
| MSHOH_1630         | <a href="#">AKB78113</a> | sensory transduction histidine kinase [Met... | CDD | <a href="#">UniProt</a> | <a href="#">Pfam</a> | <a href="#">InterPro</a> |
| MSHOH_1742         | <a href="#">AKB78225</a> | sensory transduction histidine kinase [Met... | CDD | <a href="#">UniProt</a> | <a href="#">Pfam</a> | <a href="#">InterPro</a> |
| MSHOH_1743         | <a href="#">AKB78226</a> | sensory transduction histidine kinase [Met... | CDD | <a href="#">UniProt</a> | <a href="#">Pfam</a> | <a href="#">InterPro</a> |
| MSHOH_1768         | <a href="#">AKB78251</a> | sensory transduction histidine kinase [Met... | CDD | <a href="#">UniProt</a> | <a href="#">Pfam</a> | <a href="#">InterPro</a> |
| MSHOH_1801         | <a href="#">AKB78284</a> | diguanylate cyclase/phosphodiesterase (GGD... | CDD | <a href="#">UniProt</a> | <a href="#">Pfam</a> | <a href="#">InterPro</a> |
| MSHOH_2086         | <a href="#">AKB78569</a> | Sensory transduction histidine kinase [Met... | CDD | <a href="#">UniProt</a> | <a href="#">Pfam</a> | <a href="#">InterPro</a> |
| MSHOH_2227         | <a href="#">AKB78710</a> | Sensory transduction histidine kinase [Met... | CDD | <a href="#">UniProt</a> | <a href="#">Pfam</a> | <a href="#">InterPro</a> |
| MSHOH_2295         | <a href="#">AKB78778</a> | sensory transduction histidine kinase [Met... | CDD | <a href="#">UniProt</a> | <a href="#">Pfam</a> | <a href="#">InterPro</a> |
| MSHOH_2307         | <a href="#">AKB78790</a> | sensory transduction histidine kinase [Met... | CDD | <a href="#">UniProt</a> | <a href="#">Pfam</a> | <a href="#">InterPro</a> |
| MSHOH_2332         | <a href="#">AKB78815</a> | sensory transduction histidine kinase [Met... | CDD | <a href="#">UniProt</a> | <a href="#">Pfam</a> | <a href="#">InterPro</a> |
| MSHOH_2340         | <a href="#">AKB78823</a> | sensory transduction histidine kinase [Met... | CDD | <a href="#">UniProt</a> | <a href="#">Pfam</a> | <a href="#">InterPro</a> |
| MSHOH_2356         | <a href="#">AKB78839</a> | sensory transduction histidine kinase [Met... | CDD | <a href="#">UniProt</a> | <a href="#">Pfam</a> | <a href="#">InterPro</a> |
| MSHOH_2462         | <a href="#">AKB78945</a> | hypothetical protein MSHOH_2462 [Methanosa... | CDD | <a href="#">UniProt</a> | <a href="#">Pfam</a> | <a href="#">InterPro</a> |
| MSHOH_2471         | <a href="#">AKB78954</a> | sensory transduction histidine kinase [Met... | CDD | <a href="#">UniProt</a> | <a href="#">Pfam</a> | <a href="#">InterPro</a> |
| MSHOH_2501         | <a href="#">AKB78984</a> | sensory transduction histidine kinase [Met... | CDD | <a href="#">UniProt</a> | <a href="#">Pfam</a> | <a href="#">InterPro</a> |
| MSHOH_2503         | <a href="#">AKB78986</a> | hypothetical protein MSHOH_2503 [Methanosa... | CDD | <a href="#">UniProt</a> | <a href="#">Pfam</a> | <a href="#">InterPro</a> |
| MSHOH_2549         | <a href="#">AKB79032</a> | hypothetical protein MSHOH_2549 [Methanosa... | CDD | <a href="#">UniProt</a> | <a href="#">Pfam</a> | <a href="#">InterPro</a> |
| MSHOH_2593         | <a href="#">AKB79076</a> | sensory transduction histidine kinase [Met... | CDD | <a href="#">UniProt</a> | <a href="#">Pfam</a> | <a href="#">InterPro</a> |
| MSHOH_2603         | <a href="#">AKB79086</a> | sensory transduction histidine kinase [Met... | CDD | <a href="#">UniProt</a> | <a href="#">Pfam</a> | <a href="#">InterPro</a> |
| MSHOH_2678         | <a href="#">AKB79161</a> | sensory transduction histidine kinase [Met... | CDD | <a href="#">UniProt</a> | <a href="#">Pfam</a> | <a href="#">InterPro</a> |
| MSHOH_2695         | <a href="#">AKB79178</a> | sensory transduction histidine kinase [Met... | CDD | <a href="#">UniProt</a> | <a href="#">Pfam</a> | <a href="#">InterPro</a> |
| MSHOH_2696         | <a href="#">AKB79179</a> | sensory transduction histidine kinase [Met... | CDD | <a href="#">UniProt</a> | <a href="#">Pfam</a> | <a href="#">InterPro</a> |
| MSHOH_2747         | <a href="#">AKB79230</a> | sensory transduction histidine kinase [Met... | CDD | <a href="#">UniProt</a> | <a href="#">Pfam</a> | <a href="#">InterPro</a> |
| MSHOH_2788         | <a href="#">AKB79271</a> | Sensory transduction histidine kinase [Met... | CDD | <a href="#">UniProt</a> | <a href="#">Pfam</a> | <a href="#">InterPro</a> |
| MSHOH_2796         | <a href="#">AKB79279</a> | sensory transduction histidine kinase [Met... | CDD | <a href="#">UniProt</a> | <a href="#">Pfam</a> | <a href="#">InterPro</a> |
| MSHOH_2797         | <a href="#">AKB79280</a> | sensory transduction histidine kinase [Met... | CDD | <a href="#">UniProt</a> | <a href="#">Pfam</a> | <a href="#">InterPro</a> |
| MSHOH_3148         | <a href="#">AKB79631</a> | Two component system histidine kinase [Met... | CDD | <a href="#">UniProt</a> | <a href="#">Pfam</a> | <a href="#">InterPro</a> |
| MSHOH_3253         | <a href="#">AKB79736</a> | Sensory transduction histidine kinase [Met... | CDD | <a href="#">UniProt</a> | <a href="#">Pfam</a> | <a href="#">InterPro</a> |
| MSHOH_3361         | <a href="#">AKB79844</a> | sensory transduction histidine kinase [Met... | CDD | <a href="#">UniProt</a> | <a href="#">Pfam</a> | <a href="#">InterPro</a> |
| MSHOH_3437         | <a href="#">AKB79920</a> | Signal-transducing histidine kinase [Metha... | CDD | <a href="#">UniProt</a> | <a href="#">Pfam</a> | <a href="#">InterPro</a> |
| MSHOH_3458         | <a href="#">AKB79941</a> | sensory transduction histidine kinase [Met... | CDD | <a href="#">UniProt</a> | <a href="#">Pfam</a> | <a href="#">InterPro</a> |
| MSHOH_3460         | <a href="#">AKB79943</a> | sensory transduction histidine kinase [Met... | CDD | <a href="#">UniProt</a> | <a href="#">Pfam</a> | <a href="#">InterPro</a> |
| MSHOH_3602         | <a href="#">AKB80085</a> | sensory transduction histidine kinase [Met... | CDD | <a href="#">UniProt</a> | <a href="#">Pfam</a> | <a href="#">InterPro</a> |
| MSHOH_3603         | <a href="#">AKB80086</a> | sensory transduction histidine kinase [Met... | CDD | <a href="#">UniProt</a> | <a href="#">Pfam</a> | <a href="#">InterPro</a> |
| MSHOH_3607         | <a href="#">AKB80090</a> | sensory transduction histidine kinase [Met... | CDD | <a href="#">UniProt</a> | <a href="#">Pfam</a> | <a href="#">InterPro</a> |
| MSHOH_3721         | <a href="#">AKB80204</a> | sensory transduction histidine kinase [Met... | CDD | <a href="#">UniProt</a> | <a href="#">Pfam</a> | <a href="#">InterPro</a> |
| MSHOH_3733         | <a href="#">AKB80216</a> | sensory transduction histidine kinase [Met... | CDD | <a href="#">UniProt</a> | <a href="#">Pfam</a> | <a href="#">InterPro</a> |
| MSHOH_3867         | <a href="#">AKB80350</a> | sensory transduction histidine kinase [Met... | CDD | <a href="#">UniProt</a> | <a href="#">Pfam</a> | <a href="#">InterPro</a> |
| MSHOH_4086         | <a href="#">AKB80569</a> | Signal transduction histidine kinase CheA ... | CDD | <a href="#">UniProt</a> | <a href="#">Pfam</a> | <a href="#">InterPro</a> |
| <b>Hybrid HisK</b> |                          |                                               |     |                         |                      |                          |
| MSHOH_0295         | <a href="#">AKB76778</a> | Sensory transduction histidine kinase [Met... | CDD | <a href="#">UniProt</a> | <a href="#">Pfam</a> | <a href="#">InterPro</a> |
| MSHOH_1278         | <a href="#">AKB77761</a> | hypothetical protein MSHOH_1278 [Methanosa... | CDD | <a href="#">UniProt</a> | <a href="#">Pfam</a> | <a href="#">InterPro</a> |
| MSHOH_1413         | <a href="#">AKB77896</a> | hypothetical protein MSHOH_1413 [Methanosa... | CDD | <a href="#">UniProt</a> | <a href="#">Pfam</a> | <a href="#">InterPro</a> |
| MSHOH_1756         | <a href="#">AKB78239</a> | sensory transduction histidine kinase [Met... | CDD | <a href="#">UniProt</a> | <a href="#">Pfam</a> | <a href="#">InterPro</a> |
| <b>REC only</b>    |                          |                                               |     |                         |                      |                          |
| MSHOH_0296         | <a href="#">AKB76779</a> | Two-component response regulator [Methanos... | CDD | <a href="#">UniProt</a> | <a href="#">Pfam</a> | <a href="#">InterPro</a> |
| MSHOH_1040         | <a href="#">AKB77523</a> | Two-component system response regulator [M... | CDD | <a href="#">UniProt</a> | <a href="#">Pfam</a> | <a href="#">InterPro</a> |
| MSHOH_1128         | <a href="#">AKB77611</a> | Response regulator receiver [Methanosarcin... | CDD | <a href="#">UniProt</a> | <a href="#">Pfam</a> | <a href="#">InterPro</a> |
| MSHOH_1149         | <a href="#">AKB77632</a> | Chemotaxis regulator - transmits chemorece... | CDD | <a href="#">UniProt</a> | <a href="#">Pfam</a> | <a href="#">InterPro</a> |
| MSHOH_1168         | <a href="#">AKB77651</a> | Chemotaxis regulator - transmits chemorece... | CDD | <a href="#">UniProt</a> | <a href="#">Pfam</a> | <a href="#">InterPro</a> |
| MSHOH_1279         | <a href="#">AKB77762</a> | two-component response regulator [Methanos... | CDD | <a href="#">UniProt</a> | <a href="#">Pfam</a> | <a href="#">InterPro</a> |
| MSHOH_1412         | <a href="#">AKB77895</a> | response regulator receiver [Methanosarcin... | CDD | <a href="#">UniProt</a> | <a href="#">Pfam</a> | <a href="#">InterPro</a> |
| MSHOH_1550         | <a href="#">AKB78033</a> | Response regulator receiver [Methanosarcin... | CDD | <a href="#">UniProt</a> | <a href="#">Pfam</a> | <a href="#">InterPro</a> |
| MSHOH_2228         | <a href="#">AKB78711</a> | response regulator receiver [Methanosarcin... | CDD | <a href="#">UniProt</a> | <a href="#">Pfam</a> | <a href="#">InterPro</a> |
| MSHOH_2229         | <a href="#">AKB78712</a> | response regulator receiver [Methanosarcin... | CDD | <a href="#">UniProt</a> | <a href="#">Pfam</a> | <a href="#">InterPro</a> |
| MSHOH_2339         | <a href="#">AKB78822</a> | sensory transduction histidine kinase [Met... | CDD | <a href="#">UniProt</a> | <a href="#">Pfam</a> | <a href="#">InterPro</a> |
| MSHOH_2341         | <a href="#">AKB78824</a> | response regulator receiver [Methanosarcin... | CDD | <a href="#">UniProt</a> | <a href="#">Pfam</a> | <a href="#">InterPro</a> |
| MSHOH_2795         | <a href="#">AKB79278</a> | response regulator receiver [Methanosarcin... | CDD | <a href="#">UniProt</a> | <a href="#">Pfam</a> | <a href="#">InterPro</a> |
| MSHOH_4082         | <a href="#">AKB80565</a> | Two-component response regulator [Methanos... | CDD | <a href="#">UniProt</a> | <a href="#">Pfam</a> | <a href="#">InterPro</a> |
| MSHOH_4083         | <a href="#">AKB80566</a> | Chemotaxis regulator - transmits chemorece... | CDD | <a href="#">UniProt</a> | <a href="#">Pfam</a> | <a href="#">InterPro</a> |
| MSHOH_1632         | <a href="#">AKB78115</a> | Two-component system response regulator [M... | CDD | <a href="#">UniProt</a> | <a href="#">Pfam</a> | <a href="#">InterPro</a> |
| MSHOH_4084         | <a href="#">AKB80567</a> | Chemotaxis response regulator protein-glut... | CDD | <a href="#">UniProt</a> | <a href="#">Pfam</a> | <a href="#">InterPro</a> |
| *MSHOH_1757        | <a href="#">AKB78240</a> | response regulator receiver [Methanosarcin... | CDD | <a href="#">UniProt</a> | <a href="#">Pfam</a> | <a href="#">InterPro</a> |
| <b>REC-HisK</b>    |                          |                                               |     |                         |                      |                          |
| MSHOH_1039         | <a href="#">AKB77522</a> | Sensory transduction histidine kinase [Met... | CDD | <a href="#">UniProt</a> | <a href="#">Pfam</a> | <a href="#">InterPro</a> |
| MSHOH_1633         | <a href="#">AKB78116</a> | sensory transduction histidine kinase [Met... | CDD | <a href="#">UniProt</a> | <a href="#">Pfam</a> | <a href="#">InterPro</a> |
| MSHOH_2793         | <a href="#">AKB79276</a> | hypothetical protein MSHOH_2793 [Methanosa... | CDD | <a href="#">UniProt</a> | <a href="#">Pfam</a> | <a href="#">InterPro</a> |
| <b>REC-CheB</b>    |                          |                                               |     |                         |                      |                          |
| MSHOH_1150         | <a href="#">AKB77633</a> | Chemotaxis response regulator protein-glut... | CDD | <a href="#">UniProt</a> | <a href="#">Pfam</a> | <a href="#">InterPro</a> |
| <b>wHTH-REC</b>    |                          |                                               |     |                         |                      |                          |

|                   |                          |                                               |                     |                         |                      |                          |              |
|-------------------|--------------------------|-----------------------------------------------|---------------------|-------------------------|----------------------|--------------------------|--------------|
| MSHOH_2970        | <a href="#">AKB79453</a> | Phosphate regulon transcriptional regulato... | <a href="#">CDD</a> | <a href="#">UniProt</a> | <a href="#">Pfam</a> | <a href="#">InterPro</a> |              |
| <b>REC-MetOD1</b> |                          |                                               |                     |                         |                      |                          |              |
| MSHOH_2111        | <a href="#">AKB78594</a> | Response regulator receiver [Methanosarcin... | <a href="#">CDD</a> | <a href="#">UniProt</a> | <a href="#">Pfam</a> | <a href="#">InterPro</a> | (REC-MetOD1) |

### Methanosarcina lacustris

#### HisK, no REC

|            |                          |                                               |                     |                         |                      |                          |  |
|------------|--------------------------|-----------------------------------------------|---------------------|-------------------------|----------------------|--------------------------|--|
| MSLAZ_0269 | <a href="#">AKB73530</a> | sensory transduction histidine kinase [Met... | <a href="#">CDD</a> | <a href="#">UniProt</a> | <a href="#">Pfam</a> | <a href="#">InterPro</a> |  |
| MSLAZ_0372 | <a href="#">AKB73633</a> | Signal-transducing histidine kinase [Metha... | <a href="#">CDD</a> | <a href="#">UniProt</a> | <a href="#">Pfam</a> | <a href="#">InterPro</a> |  |
| MSLAZ_0583 | <a href="#">AKB73844</a> | sensory transduction histidine kinase [Met... | <a href="#">CDD</a> | <a href="#">UniProt</a> | <a href="#">Pfam</a> | <a href="#">InterPro</a> |  |
| MSLAZ_0695 | <a href="#">AKB73956</a> | Two component system histidine kinase [Met... | <a href="#">CDD</a> | <a href="#">UniProt</a> | <a href="#">Pfam</a> | <a href="#">InterPro</a> |  |
| MSLAZ_0772 | <a href="#">AKB74033</a> | sensory transduction histidine kinase [Met... | <a href="#">CDD</a> | <a href="#">UniProt</a> | <a href="#">Pfam</a> | <a href="#">InterPro</a> |  |
| MSLAZ_0907 | <a href="#">AKB74168</a> | sensory transduction histidine kinase [Met... | <a href="#">CDD</a> | <a href="#">UniProt</a> | <a href="#">Pfam</a> | <a href="#">InterPro</a> |  |
| MSLAZ_1507 | <a href="#">AKB74768</a> | hypothetical protein MSLAZ_1507 [Methanosa... | <a href="#">CDD</a> | <a href="#">UniProt</a> | <a href="#">Pfam</a> | <a href="#">InterPro</a> |  |
| MSLAZ_1509 | <a href="#">AKB74770</a> | sensory transduction histidine kinase [Met... | <a href="#">CDD</a> | <a href="#">UniProt</a> | <a href="#">Pfam</a> | <a href="#">InterPro</a> |  |
| MSLAZ_1663 | <a href="#">AKB74924</a> | Sensory transduction histidine kinase [Met... | <a href="#">CDD</a> | <a href="#">UniProt</a> | <a href="#">Pfam</a> | <a href="#">InterPro</a> |  |
| MSLAZ_1665 | <a href="#">AKB74926</a> | Sensory transduction histidine kinase [Met... | <a href="#">CDD</a> | <a href="#">UniProt</a> | <a href="#">Pfam</a> | <a href="#">InterPro</a> |  |
| MSLAZ_1814 | <a href="#">AKB75075</a> | hypothetical protein MSLAZ_1814 [Methanosa... | <a href="#">CDD</a> | <a href="#">UniProt</a> | <a href="#">Pfam</a> | <a href="#">InterPro</a> |  |
| MSLAZ_1912 | <a href="#">AKB75173</a> | sensory transduction histidine kinase [Met... | <a href="#">CDD</a> | <a href="#">UniProt</a> | <a href="#">Pfam</a> | <a href="#">InterPro</a> |  |
| MSLAZ_1992 | <a href="#">AKB75253</a> | hypothetical protein MSLAZ_1992 [Methanosa... | <a href="#">CDD</a> | <a href="#">UniProt</a> | <a href="#">Pfam</a> | <a href="#">InterPro</a> |  |
| MSLAZ_2115 | <a href="#">AKB75376</a> | Sensory transduction histidine kinase [Met... | <a href="#">CDD</a> | <a href="#">UniProt</a> | <a href="#">Pfam</a> | <a href="#">InterPro</a> |  |
| MSLAZ_2313 | <a href="#">AKB75574</a> | sensory transduction histidine kinase [Met... | <a href="#">CDD</a> | <a href="#">UniProt</a> | <a href="#">Pfam</a> | <a href="#">InterPro</a> |  |
| MSLAZ_2602 | <a href="#">AKB75863</a> | sensory transduction histidine kinase [Met... | <a href="#">CDD</a> | <a href="#">UniProt</a> | <a href="#">Pfam</a> | <a href="#">InterPro</a> |  |
| MSLAZ_3096 | <a href="#">AKB76357</a> | Signal transduction histidine kinase CheA ... | <a href="#">CDD</a> | <a href="#">UniProt</a> | <a href="#">Pfam</a> | <a href="#">InterPro</a> |  |

#### Hybrid HisK

|            |                          |                                               |                     |                         |                      |                          |  |
|------------|--------------------------|-----------------------------------------------|---------------------|-------------------------|----------------------|--------------------------|--|
| MSLAZ_2967 | <a href="#">AKB76228</a> | Sensory transduction histidine kinase [Met... | <a href="#">CDD</a> | <a href="#">UniProt</a> | <a href="#">Pfam</a> | <a href="#">InterPro</a> |  |
|------------|--------------------------|-----------------------------------------------|---------------------|-------------------------|----------------------|--------------------------|--|

#### REC only

|            |                          |                                               |                     |                         |                      |                          |  |
|------------|--------------------------|-----------------------------------------------|---------------------|-------------------------|----------------------|--------------------------|--|
| MSLAZ_0906 | <a href="#">AKB74167</a> | response regulator receiver [Methanosarcin... | <a href="#">CDD</a> | <a href="#">UniProt</a> | <a href="#">Pfam</a> | <a href="#">InterPro</a> |  |
| MSLAZ_1661 | <a href="#">AKB74922</a> | response regulator receiver [Methanosarcin... | <a href="#">CDD</a> | <a href="#">UniProt</a> | <a href="#">Pfam</a> | <a href="#">InterPro</a> |  |
| MSLAZ_1662 | <a href="#">AKB74923</a> | response regulator receiver [Methanosarcin... | <a href="#">CDD</a> | <a href="#">UniProt</a> | <a href="#">Pfam</a> | <a href="#">InterPro</a> |  |
| MSLAZ_1890 | <a href="#">AKB75151</a> | Response regulator receiver [Methanosarcin... | <a href="#">CDD</a> | <a href="#">UniProt</a> | <a href="#">Pfam</a> | <a href="#">InterPro</a> |  |
| MSLAZ_2968 | <a href="#">AKB76229</a> | Two-component response regulator [Methanos... | <a href="#">CDD</a> | <a href="#">UniProt</a> | <a href="#">Pfam</a> | <a href="#">InterPro</a> |  |
| MSLAZ_3098 | <a href="#">AKB76359</a> | Chemotaxis regulator - transmits chemorece... | <a href="#">CDD</a> | <a href="#">UniProt</a> | <a href="#">Pfam</a> | <a href="#">InterPro</a> |  |
| MSLAZ_3099 | <a href="#">AKB76360</a> | Two-component response regulator [Methanos... | <a href="#">CDD</a> | <a href="#">UniProt</a> | <a href="#">Pfam</a> | <a href="#">InterPro</a> |  |

#### REC-CheB

|            |                          |                                               |                     |                         |                      |                          |  |
|------------|--------------------------|-----------------------------------------------|---------------------|-------------------------|----------------------|--------------------------|--|
| MSLAZ_3097 | <a href="#">AKB76358</a> | Chemotaxis response regulator protein-glut... | <a href="#">CDD</a> | <a href="#">UniProt</a> | <a href="#">Pfam</a> | <a href="#">InterPro</a> |  |
|------------|--------------------------|-----------------------------------------------|---------------------|-------------------------|----------------------|--------------------------|--|

#### wHTH-REC

|            |                          |                                               |                     |                         |                      |                          |  |
|------------|--------------------------|-----------------------------------------------|---------------------|-------------------------|----------------------|--------------------------|--|
| MSLAZ_0950 | <a href="#">AKB74211</a> | two-component response regulator [Methanos... | <a href="#">CDD</a> | <a href="#">UniProt</a> | <a href="#">Pfam</a> | <a href="#">InterPro</a> |  |
|------------|--------------------------|-----------------------------------------------|---------------------|-------------------------|----------------------|--------------------------|--|

#### REC-MetOD1

|            |                          |                                               |                     |                         |                      |                          |              |
|------------|--------------------------|-----------------------------------------------|---------------------|-------------------------|----------------------|--------------------------|--------------|
| MSLAZ_1145 | <a href="#">AKB74406</a> | Response regulator receiver [Methanosarcin... | <a href="#">CDD</a> | <a href="#">UniProt</a> | <a href="#">Pfam</a> | <a href="#">InterPro</a> | (REC-MetOD1) |
|------------|--------------------------|-----------------------------------------------|---------------------|-------------------------|----------------------|--------------------------|--------------|

### Methanosarcina mazei Gol

#### HisK, no REC

|         |                          |                                               |                     |                         |                      |                          |  |
|---------|--------------------------|-----------------------------------------------|---------------------|-------------------------|----------------------|--------------------------|--|
| MM_0168 | <a href="#">AAM29864</a> | hypothetical sensory transduction histidin... | <a href="#">CDD</a> | <a href="#">UniProt</a> | <a href="#">Pfam</a> | <a href="#">InterPro</a> |  |
| MM_0169 | <a href="#">AAM29865</a> | hypothetical sensory transduction histidin... | <a href="#">CDD</a> | <a href="#">UniProt</a> | <a href="#">Pfam</a> | <a href="#">InterPro</a> |  |
| MM_0328 | <a href="#">AAM30024</a> | Chemotaxis protein [Methanosarcina mazei G... | <a href="#">CDD</a> | <a href="#">UniProt</a> | <a href="#">Pfam</a> | <a href="#">InterPro</a> |  |
| MM_0518 | <a href="#">AAM30214</a> | hypothetical sensory transduction histidin... | <a href="#">CDD</a> | <a href="#">UniProt</a> | <a href="#">Pfam</a> | <a href="#">InterPro</a> |  |
| MM_0889 | <a href="#">AAM30585</a> | hypothetical protein MM_0889 [Methanosarci... | <a href="#">CDD</a> | <a href="#">UniProt</a> | <a href="#">Pfam</a> | <a href="#">InterPro</a> |  |
| MM_0948 | <a href="#">AAM30644</a> | Sensory transduction histidine kinases [Me... | <a href="#">CDD</a> | <a href="#">UniProt</a> | <a href="#">Pfam</a> | <a href="#">InterPro</a> |  |
| MM_1093 | <a href="#">AAM30789</a> | hypothetical sensory transduction histidin... | <a href="#">CDD</a> | <a href="#">UniProt</a> | <a href="#">Pfam</a> | <a href="#">InterPro</a> |  |
| MM_1325 | <a href="#">AAM31021</a> | Chemotaxis protein [Methanosarcina mazei G... | <a href="#">CDD</a> | <a href="#">UniProt</a> | <a href="#">Pfam</a> | <a href="#">InterPro</a> |  |
| MM_1671 | <a href="#">AAM31367</a> | hypothetical sensory transduction histidin... | <a href="#">CDD</a> | <a href="#">UniProt</a> | <a href="#">Pfam</a> | <a href="#">InterPro</a> |  |
| MM_1777 | <a href="#">AAM31473</a> | hypothetical sensory transduction histidin... | <a href="#">CDD</a> | <a href="#">UniProt</a> | <a href="#">Pfam</a> | <a href="#">InterPro</a> |  |
| MM_1781 | <a href="#">AAM31477</a> | hypothetical sensory transduction histidin... | <a href="#">CDD</a> | <a href="#">UniProt</a> | <a href="#">Pfam</a> | <a href="#">InterPro</a> |  |
| MM_1915 | <a href="#">AAM31611</a> | hypothetical sensory transduction histidin... | <a href="#">CDD</a> | <a href="#">UniProt</a> | <a href="#">Pfam</a> | <a href="#">InterPro</a> |  |
| MM_1931 | <a href="#">AAM31627</a> | sensory transduction protein kinase [Metha... | <a href="#">CDD</a> | <a href="#">UniProt</a> | <a href="#">Pfam</a> | <a href="#">InterPro</a> |  |
| MM_2178 | <a href="#">AAM31874</a> | Two component system histidine kinase [Met... | <a href="#">CDD</a> | <a href="#">UniProt</a> | <a href="#">Pfam</a> | <a href="#">InterPro</a> |  |
| MM_2275 | <a href="#">AAM31971</a> | hypothetical sensory transduction histidin... | <a href="#">CDD</a> | <a href="#">UniProt</a> | <a href="#">Pfam</a> | <a href="#">InterPro</a> |  |
| MM_2276 | <a href="#">AAM31972</a> | hypothetical sensory transduction histidin... | <a href="#">CDD</a> | <a href="#">UniProt</a> | <a href="#">Pfam</a> | <a href="#">InterPro</a> |  |
| MM_2277 | <a href="#">AAM31973</a> | hypothetical sensory transduction histidin... | <a href="#">CDD</a> | <a href="#">UniProt</a> | <a href="#">Pfam</a> | <a href="#">InterPro</a> |  |
| MM_2435 | <a href="#">AAM32131</a> | hypothetical sensory transduction histidin... | <a href="#">CDD</a> | <a href="#">UniProt</a> | <a href="#">Pfam</a> | <a href="#">InterPro</a> |  |
| MM_2515 | <a href="#">AAM32211</a> | hypothetical sensory transduction histidin... | <a href="#">CDD</a> | <a href="#">UniProt</a> | <a href="#">Pfam</a> | <a href="#">InterPro</a> |  |
| MM_2629 | <a href="#">AAM32325</a> | hypothetical sensory transduction histidin... | <a href="#">CDD</a> | <a href="#">UniProt</a> | <a href="#">Pfam</a> | <a href="#">InterPro</a> |  |
| MM_2646 | <a href="#">AAM32342</a> | sensory transduction protein kinase [Metha... | <a href="#">CDD</a> | <a href="#">UniProt</a> | <a href="#">Pfam</a> | <a href="#">InterPro</a> |  |
| MM_2748 | <a href="#">AAM32444</a> | hypothetical sensory transduction histidin... | <a href="#">CDD</a> | <a href="#">UniProt</a> | <a href="#">Pfam</a> | <a href="#">InterPro</a> |  |
| MM_2773 | <a href="#">AAM32469</a> | Two component system histidine kinase [Met... | <a href="#">CDD</a> | <a href="#">UniProt</a> | <a href="#">Pfam</a> | <a href="#">InterPro</a> |  |
| MM_2886 | <a href="#">AAM32582</a> | hypothetical sensory transduction histidin... | <a href="#">CDD</a> | <a href="#">UniProt</a> | <a href="#">Pfam</a> | <a href="#">InterPro</a> |  |
| MM_2955 | <a href="#">AAM32651</a> | hypothetical sensory transduction histidin... | <a href="#">CDD</a> | <a href="#">UniProt</a> | <a href="#">Pfam</a> | <a href="#">InterPro</a> |  |
| MM_2965 | <a href="#">AAM32661</a> | hypothetical sensory transduction histidin... | <a href="#">CDD</a> | <a href="#">UniProt</a> | <a href="#">Pfam</a> | <a href="#">InterPro</a> |  |
| MM_2990 | <a href="#">AAM32686</a> | hypothetical sensory transduction histidin... | <a href="#">CDD</a> | <a href="#">UniProt</a> | <a href="#">Pfam</a> | <a href="#">InterPro</a> |  |
| MM_3099 | <a href="#">AAM32795</a> | Two component system histidine kinase [Met... | <a href="#">CDD</a> | <a href="#">UniProt</a> | <a href="#">Pfam</a> | <a href="#">InterPro</a> |  |
| MM_3101 | <a href="#">AAM32797</a> | Two component system histidine kinase [Met... | <a href="#">CDD</a> | <a href="#">UniProt</a> | <a href="#">Pfam</a> | <a href="#">InterPro</a> |  |
| MM_3158 | <a href="#">AAM32854</a> | hypothetical protein MM_3158 [Methanosarci... | <a href="#">CDD</a> | <a href="#">UniProt</a> | <a href="#">Pfam</a> | <a href="#">InterPro</a> |  |
| MM_3295 | <a href="#">AAM32991</a> | hypothetical sensory transduction histidin... | <a href="#">CDD</a> | <a href="#">UniProt</a> | <a href="#">Pfam</a> | <a href="#">InterPro</a> |  |

#### Hybrid HisK

|         |                          |                                               |                     |                         |                      |                          |  |
|---------|--------------------------|-----------------------------------------------|---------------------|-------------------------|----------------------|--------------------------|--|
| MM_2881 | <a href="#">AAM32577</a> | Sensor histidine kinase/response regulator... | <a href="#">CDD</a> | <a href="#">UniProt</a> | <a href="#">Pfam</a> | <a href="#">InterPro</a> |  |
|---------|--------------------------|-----------------------------------------------|---------------------|-------------------------|----------------------|--------------------------|--|

|         |                          |                                               |                     |                         |                      |                          |  |
|---------|--------------------------|-----------------------------------------------|---------------------|-------------------------|----------------------|--------------------------|--|
| MM_3205 | <a href="#">AAM32901</a> | Two component system histidine kinase [Met... | <a href="#">CDD</a> | <a href="#">UniProt</a> | <a href="#">Pfam</a> | <a href="#">InterPro</a> |  |
|---------|--------------------------|-----------------------------------------------|---------------------|-------------------------|----------------------|--------------------------|--|

#### REC only

|                   |                          |                                                  |     |                         |                      |                                       |
|-------------------|--------------------------|--------------------------------------------------|-----|-------------------------|----------------------|---------------------------------------|
| MM_0049           | <a href="#">AAM29745</a> | conserved protein [Methanosarcina mazei Go...    | CDD | <a href="#">UniProt</a> | <a href="#">Pfam</a> | <a href="#">InterPro</a>              |
| MM_0330           | <a href="#">AAM30026</a> | Chemotaxis protein [Methanosarcina mazei ...     | CDD | <a href="#">UniProt</a> | <a href="#">Pfam</a> | <a href="#">InterPro</a>              |
| MM_1068           | <a href="#">AAM30764</a> | Two-component response regulator [Methanos...    | CDD | <a href="#">UniProt</a> | <a href="#">Pfam</a> | <a href="#">InterPro</a>              |
| MM_1327           | <a href="#">AAM31023</a> | Chemotaxis protein [Methanosarcina mazei ...     | CDD | <a href="#">UniProt</a> | <a href="#">Pfam</a> | <a href="#">InterPro</a>              |
| MM_1328           | <a href="#">AAM31024</a> | Two-component response regulator [Methanos...    | CDD | <a href="#">UniProt</a> | <a href="#">Pfam</a> | <a href="#">InterPro</a>              |
| MM_2516           | <a href="#">AAM32212</a> | putative transcriptional regulator [Methan...    | CDD | <a href="#">UniProt</a> | <a href="#">Pfam</a> | <a href="#">InterPro</a>              |
| MM_2880           | <a href="#">AAM32576</a> | Response regulator [Methanosarcina mazei G...    | CDD | <a href="#">UniProt</a> | <a href="#">Pfam</a> | <a href="#">InterPro</a>              |
| MM_2953           | <a href="#">AAM32649</a> | transcriptional regulator [Methanosarcina ...    | CDD | <a href="#">UniProt</a> | <a href="#">Pfam</a> | <a href="#">InterPro</a>              |
| MM_2954           | <a href="#">AAM32650</a> | transcriptional regulator [Methanosarcina ...    | CDD | <a href="#">UniProt</a> | <a href="#">Pfam</a> | <a href="#">InterPro</a>              |
| MM_3206           | <a href="#">AAM32902</a> | Response regulator receiver domain [Methan...    | CDD | <a href="#">UniProt</a> | <a href="#">Pfam</a> | <a href="#">InterPro</a>              |
| <b>REC-HisK</b>   |                          |                                                  |     |                         |                      |                                       |
| MM_2518           | <a href="#">AAM32214</a> | Sensory transduction histidine kinases [Me...    | CDD | <a href="#">UniProt</a> | <a href="#">Pfam</a> | <a href="#">InterPro</a>              |
| <b>REC-CheB</b>   |                          |                                                  |     |                         |                      |                                       |
| MM_0329           | <a href="#">AAM30025</a> | protein-glutamate methyltransferase [Methanos... | CDD | <a href="#">UniProt</a> | <a href="#">Pfam</a> | <a href="#">InterPro</a>              |
| MM_1326           | <a href="#">AAM31022</a> | protein-glutamate methyltransferase [Methanos... | CDD | <a href="#">UniProt</a> | <a href="#">Pfam</a> | <a href="#">InterPro</a>              |
| <b>wHTH-REC</b>   |                          |                                                  |     |                         |                      |                                       |
| MM_2351           | <a href="#">AAM32047</a> | transcriptional regulator [Methanosarcina ...    | CDD | <a href="#">UniProt</a> | <a href="#">Pfam</a> | <a href="#">InterPro</a> (wHTH-REC)   |
| <b>REC-MetOD1</b> |                          |                                                  |     |                         |                      |                                       |
| MM_3007           | <a href="#">AAM32703</a> | putative transcriptional regulator [Methan...    | CDD | <a href="#">UniProt</a> | <a href="#">Pfam</a> | <a href="#">InterPro</a> (REC-MetOD1) |

### **Methanosarcina siciliae C2J**

|            |                          |                                               |     |                         |                      |                          |
|------------|--------------------------|-----------------------------------------------|-----|-------------------------|----------------------|--------------------------|
| MSSAC_0011 | <a href="#">AKB34601</a> | Sensory transduction histidine kinase [Met... | CDD | <a href="#">UniProt</a> | <a href="#">Pfam</a> | <a href="#">InterPro</a> |
| MSSAC_0014 | <a href="#">AKB34604</a> | sensory transduction histidine kinase [Met... | CDD | <a href="#">UniProt</a> | <a href="#">Pfam</a> | <a href="#">InterPro</a> |
| MSSAC_0177 | <a href="#">AKB34767</a> | sensory transduction histidine kinase [Met... | CDD | <a href="#">UniProt</a> | <a href="#">Pfam</a> | <a href="#">InterPro</a> |
| MSSAC_0198 | <a href="#">AKB34788</a> | sensory transduction histidine kinase [Met... | CDD | <a href="#">UniProt</a> | <a href="#">Pfam</a> | <a href="#">InterPro</a> |
| MSSAC_0426 | <a href="#">AKB35016</a> | sensory transduction histidine kinase [Met... | CDD | <a href="#">UniProt</a> | <a href="#">Pfam</a> | <a href="#">InterPro</a> |
| MSSAC_0427 | <a href="#">AKB35017</a> | hypothetical protein MSSAC_0427 [Methanosa... | CDD | <a href="#">UniProt</a> | <a href="#">Pfam</a> | <a href="#">InterPro</a> |
| MSSAC_0481 | <a href="#">AKB35071</a> | sensory transduction histidine kinase [Met... | CDD | <a href="#">UniProt</a> | <a href="#">Pfam</a> | <a href="#">InterPro</a> |
| MSSAC_0559 | <a href="#">AKB35149</a> | sensory transduction histidine kinase [Met... | CDD | <a href="#">UniProt</a> | <a href="#">Pfam</a> | <a href="#">InterPro</a> |
| MSSAC_0696 | <a href="#">AKB35286</a> | sensory transduction histidine kinase [Met... | CDD | <a href="#">UniProt</a> | <a href="#">Pfam</a> | <a href="#">InterPro</a> |
| MSSAC_0698 | <a href="#">AKB35288</a> | sensory transduction histidine kinase [Met... | CDD | <a href="#">UniProt</a> | <a href="#">Pfam</a> | <a href="#">InterPro</a> |
| MSSAC_0717 | <a href="#">AKB35307</a> | Signal-transducing histidine kinase [Metha... | CDD | <a href="#">UniProt</a> | <a href="#">Pfam</a> | <a href="#">InterPro</a> |
| MSSAC_0796 | <a href="#">AKB35386</a> | hypothetical protein MSSAC_0796 [Methanosa... | CDD | <a href="#">UniProt</a> | <a href="#">Pfam</a> | <a href="#">InterPro</a> |
| MSSAC_0903 | <a href="#">AKB35493</a> | sensory transduction histidine kinase [Met... | CDD | <a href="#">UniProt</a> | <a href="#">Pfam</a> | <a href="#">InterPro</a> |
| MSSAC_1067 | <a href="#">AKB35657</a> | sensory transduction histidine kinase [Met... | CDD | <a href="#">UniProt</a> | <a href="#">Pfam</a> | <a href="#">InterPro</a> |
| MSSAC_1068 | <a href="#">AKB35658</a> | sensory transduction histidine kinase [Met... | CDD | <a href="#">UniProt</a> | <a href="#">Pfam</a> | <a href="#">InterPro</a> |
| MSSAC_1072 | <a href="#">AKB35662</a> | sensory transduction histidine kinase [Met... | CDD | <a href="#">UniProt</a> | <a href="#">Pfam</a> | <a href="#">InterPro</a> |
| MSSAC_1239 | <a href="#">AKB35829</a> | Two component system histidine kinase [Met... | CDD | <a href="#">UniProt</a> | <a href="#">Pfam</a> | <a href="#">InterPro</a> |
| MSSAC_1480 | <a href="#">AKB36070</a> | sensory transduction histidine kinase [Met... | CDD | <a href="#">UniProt</a> | <a href="#">Pfam</a> | <a href="#">InterPro</a> |
| MSSAC_1602 | <a href="#">AKB36192</a> | sensory transduction histidine kinase [Met... | CDD | <a href="#">UniProt</a> | <a href="#">Pfam</a> | <a href="#">InterPro</a> |
| MSSAC_1607 | <a href="#">AKB36197</a> | sensory transduction histidine kinase [Met... | CDD | <a href="#">UniProt</a> | <a href="#">Pfam</a> | <a href="#">InterPro</a> |
| MSSAC_1609 | <a href="#">AKB36199</a> | sensory transduction histidine kinase [Met... | CDD | <a href="#">UniProt</a> | <a href="#">Pfam</a> | <a href="#">InterPro</a> |
| MSSAC_1656 | <a href="#">AKB36246</a> | sensory transduction histidine kinase [Met... | CDD | <a href="#">UniProt</a> | <a href="#">Pfam</a> | <a href="#">InterPro</a> |
| MSSAC_1658 | <a href="#">AKB36248</a> | sensory transduction histidine kinase [Met... | CDD | <a href="#">UniProt</a> | <a href="#">Pfam</a> | <a href="#">InterPro</a> |
| MSSAC_1905 | <a href="#">AKB36495</a> | sensory transduction histidine kinase [Met... | CDD | <a href="#">UniProt</a> | <a href="#">Pfam</a> | <a href="#">InterPro</a> |
| MSSAC_2044 | <a href="#">AKB36634</a> | sensory transduction histidine kinase [Met... | CDD | <a href="#">UniProt</a> | <a href="#">Pfam</a> | <a href="#">InterPro</a> |
| MSSAC_2244 | <a href="#">AKB36834</a> | sensory transduction histidine kinase [Met... | CDD | <a href="#">UniProt</a> | <a href="#">Pfam</a> | <a href="#">InterPro</a> |
| MSSAC_2263 | <a href="#">AKB36853</a> | sensory transduction histidine kinase [Met... | CDD | <a href="#">UniProt</a> | <a href="#">Pfam</a> | <a href="#">InterPro</a> |
| MSSAC_2379 | <a href="#">AKB36969</a> | Sensory transduction histidine kinase [Met... | CDD | <a href="#">UniProt</a> | <a href="#">Pfam</a> | <a href="#">InterPro</a> |
| MSSAC_2382 | <a href="#">AKB36972</a> | Sensory transduction histidine kinase [Met... | CDD | <a href="#">UniProt</a> | <a href="#">Pfam</a> | <a href="#">InterPro</a> |
| MSSAC_2503 | <a href="#">AKB37093</a> | sensory transduction histidine kinase [Met... | CDD | <a href="#">UniProt</a> | <a href="#">Pfam</a> | <a href="#">InterPro</a> |
| MSSAC_2562 | <a href="#">AKB37152</a> | hypothetical protein MSSAC_2562 [Methanosa... | CDD | <a href="#">UniProt</a> | <a href="#">Pfam</a> | <a href="#">InterPro</a> |
| MSSAC_2585 | <a href="#">AKB37175</a> | sensory transduction histidine kinase [Met... | CDD | <a href="#">UniProt</a> | <a href="#">Pfam</a> | <a href="#">InterPro</a> |
| MSSAC_2666 | <a href="#">AKB37256</a> | sensory transduction histidine kinase [Met... | CDD | <a href="#">UniProt</a> | <a href="#">Pfam</a> | <a href="#">InterPro</a> |
| MSSAC_2668 | <a href="#">AKB37258</a> | sensory transduction histidine kinase [Met... | CDD | <a href="#">UniProt</a> | <a href="#">Pfam</a> | <a href="#">InterPro</a> |
| MSSAC_2881 | <a href="#">AKB37471</a> | Sensory transduction histidine kinase [Met... | CDD | <a href="#">UniProt</a> | <a href="#">Pfam</a> | <a href="#">InterPro</a> |
| MSSAC_2891 | <a href="#">AKB37481</a> | hypothetical protein MSSAC_2891 [Methanosa... | CDD | <a href="#">UniProt</a> | <a href="#">Pfam</a> | <a href="#">InterPro</a> |
| MSSAC_2975 | <a href="#">AKB37565</a> | Signal transduction histidine kinase CheA ... | CDD | <a href="#">UniProt</a> | <a href="#">Pfam</a> | <a href="#">InterPro</a> |
| MSSAC_3292 | <a href="#">AKB37882</a> | sensory transduction histidine kinase [Met... | CDD | <a href="#">UniProt</a> | <a href="#">Pfam</a> | <a href="#">InterPro</a> |
| MSSAC_3700 | <a href="#">AKB38290</a> | Sensory transduction histidine kinase [Met... | CDD | <a href="#">UniProt</a> | <a href="#">Pfam</a> | <a href="#">InterPro</a> |
| MSSAC_3755 | <a href="#">AKB38345</a> | sensory transduction histidine kinase [Met... | CDD | <a href="#">UniProt</a> | <a href="#">Pfam</a> | <a href="#">InterPro</a> |
| MSSAC_4240 | <a href="#">AKB38830</a> | sensory transduction histidine kinase [Met... | CDD | <a href="#">UniProt</a> | <a href="#">Pfam</a> | <a href="#">InterPro</a> |
| MSSAC_4337 | <a href="#">AKB38927</a> | Signal transduction histidine kinase CheA ... | CDD | <a href="#">UniProt</a> | <a href="#">Pfam</a> | <a href="#">InterPro</a> |

### **Hybrid HisK**

MSSAC\_4062 [AKB38652](#) Sensory transduction histidine kinase [Met... CDD [UniProt](#) [Pfam](#) [InterPro](#)

### **HisKA, no HATPase**

MSSAC\_1776 [AKB36366](#) Sensory transduction histidine kinase [Met... CDD [UniProt](#) [Pfam](#) [InterPro](#)

### **REC only**

MSSAC\_1073 [AKB35663](#) Two-component system response regulator [M... CDD [UniProt](#) [Pfam](#) [InterPro](#)

MSSAC\_1074 [AKB35664](#) Two-component system response regulator [M... CDD [UniProt](#) [Pfam](#) [InterPro](#)

MSSAC\_1481 [AKB36071](#) response regulator receiver [Methanosarcin... CDD [UniProt](#) [Pfam](#) [InterPro](#)

MSSAC\_2383 [AKB36973](#) response regulator receiver [Methanosarcin... CDD [UniProt](#) [Pfam](#) [InterPro](#)

MSSAC\_2384 [AKB36974](#) response regulator receiver [Methanosarcin... CDD [UniProt](#) [Pfam](#) [InterPro](#)

MSSAC\_2852 [AKB37442](#) Response regulator receiver [Methanosarcin... CDD [UniProt](#) [Pfam](#) [InterPro](#)

MSSAC\_2973 [AKB37563](#) Chemotaxis regulator - transmits chemorece... CDD [UniProt](#) [Pfam](#) [InterPro](#)

MSSAC\_4061 [AKB38651](#) Two-component response regulator [Methanos... CDD [UniProt](#) [Pfam](#) [InterPro](#)

MSSAC\_4339 [AKB38929](#) Chemotaxis regulator - transmits chemorece... CDD [UniProt](#) [Pfam](#) [InterPro](#)

MSSAC\_4340 [AKB38930](#) Two-component response regulator [Methanos... CDD [UniProt](#) [Pfam](#) [InterPro](#)

|                   |                          |                                               |                     |                         |                      |                                       |
|-------------------|--------------------------|-----------------------------------------------|---------------------|-------------------------|----------------------|---------------------------------------|
| *MSSAC_2270       | <a href="#">AKB36860</a> | response regulator receiver [Methanosarcin... | <a href="#">CDD</a> | <a href="#">UniProt</a> | <a href="#">Pfam</a> | <a href="#">InterPro</a>              |
| <b>REC-HisK</b>   |                          |                                               |                     |                         |                      |                                       |
| MSSAC_1075        | <a href="#">AKB35665</a> | Sensory transduction histidine kinase [Met... | <a href="#">CDD</a> | <a href="#">UniProt</a> | <a href="#">Pfam</a> | <a href="#">InterPro</a>              |
| MSSAC_2826        | <a href="#">AKB37416</a> | hypothetical protein MSSAC_2826 [Methanosa... | <a href="#">CDD</a> | <a href="#">UniProt</a> | <a href="#">Pfam</a> | <a href="#">InterPro</a>              |
| <b>REC-CheB</b>   |                          |                                               |                     |                         |                      |                                       |
| MSSAC_2974        | <a href="#">AKB37564</a> | Chemotaxis response regulator protein-glut... | <a href="#">CDD</a> | <a href="#">UniProt</a> | <a href="#">Pfam</a> | <a href="#">InterPro</a>              |
| MSSAC_4338        | <a href="#">AKB38928</a> | Chemotaxis response regulator protein-glut... | <a href="#">CDD</a> | <a href="#">UniProt</a> | <a href="#">Pfam</a> | <a href="#">InterPro</a>              |
| <b>wHTH-REC</b>   |                          |                                               |                     |                         |                      |                                       |
| MSSAC_1372        | <a href="#">AKB35962</a> | response regulator receiver [Methanosarcin... | <a href="#">CDD</a> | <a href="#">UniProt</a> | <a href="#">Pfam</a> | <a href="#">InterPro</a> (wHTH-REC)   |
| <b>REC-MetOD1</b> |                          |                                               |                     |                         |                      |                                       |
| MSSAC_2753        | <a href="#">AKB37343</a> | Response regulator receiver [Methanosarcin... | <a href="#">CDD</a> | <a href="#">UniProt</a> | <a href="#">Pfam</a> | <a href="#">InterPro</a> (REC-MetOD1) |

### Methanosarcina sp. 795

|                              |                          |                                              |                     |                         |                      |                                       |
|------------------------------|--------------------------|----------------------------------------------|---------------------|-------------------------|----------------------|---------------------------------------|
| <b>HisK, no REC</b>          |                          |                                              |                     |                         |                      |                                       |
| AA43_03140                   | <a href="#">ALK04871</a> | chemotaxis protein [Methanosarcina sp. 79... | <a href="#">CDD</a> | <a href="#">UniProt</a> | <a href="#">Pfam</a> | <a href="#">InterPro</a>              |
| AA43_05040                   | <a href="#">ALK05185</a> | hypothetical protein AAY43_05040 [Methano... | <a href="#">CDD</a> | <a href="#">UniProt</a> | <a href="#">Pfam</a> | <a href="#">InterPro</a>              |
| AA43_05080                   | <a href="#">ALK05190</a> | hypothetical protein AAY43_05080 [Methano... | <a href="#">CDD</a> | <a href="#">UniProt</a> | <a href="#">Pfam</a> | <a href="#">InterPro</a>              |
| AA43_07605                   | <a href="#">ALK05587</a> | histidine kinase [Methanosarcina sp. 795]... | <a href="#">CDD</a> | <a href="#">UniProt</a> | <a href="#">Pfam</a> | <a href="#">InterPro</a>              |
| AA43_10675                   | <a href="#">ALK06067</a> | ATPase [Methanosarcina sp. 795] ...          | <a href="#">CDD</a> | <a href="#">UniProt</a> | <a href="#">Pfam</a> | <a href="#">InterPro</a>              |
| AA43_11175                   | <a href="#">ALK06146</a> | ATPase [Methanosarcina sp. 795] ...          | <a href="#">CDD</a> | <a href="#">UniProt</a> | <a href="#">Pfam</a> | <a href="#">InterPro</a>              |
| AA43_12015                   | <a href="#">ALK06271</a> | histidine kinase [Methanosarcina sp. 795]... | <a href="#">CDD</a> | <a href="#">UniProt</a> | <a href="#">Pfam</a> | <a href="#">InterPro</a>              |
| AA43_00695                   | <a href="#">ALK06511</a> | hypothetical protein AAY43_00695 [Methano... | <a href="#">CDD</a> | <a href="#">UniProt</a> | <a href="#">Pfam</a> | <a href="#">InterPro</a>              |
| AA43_01580                   | <a href="#">ALK06525</a> | histidine kinase [Methanosarcina sp. 795]... | <a href="#">CDD</a> | <a href="#">UniProt</a> | <a href="#">Pfam</a> | <a href="#">InterPro</a>              |
| AA43_04720                   | <a href="#">ALK06595</a> | hypothetical protein AAY43_04720 [Methano... | <a href="#">CDD</a> | <a href="#">UniProt</a> | <a href="#">Pfam</a> | <a href="#">InterPro</a>              |
| AA43_05095                   | <a href="#">ALK06604</a> | ATPase [Methanosarcina sp. 795] ...          | <a href="#">CDD</a> | <a href="#">UniProt</a> | <a href="#">Pfam</a> | <a href="#">InterPro</a>              |
| AA43_08800                   | <a href="#">ALK06679</a> | hypothetical protein AAY43_08800 [Methano... | <a href="#">CDD</a> | <a href="#">UniProt</a> | <a href="#">Pfam</a> | <a href="#">InterPro</a>              |
| AA43_09950                   | <a href="#">ALK06704</a> | histidine kinase [Methanosarcina sp. 795]... | <a href="#">CDD</a> | <a href="#">UniProt</a> | <a href="#">Pfam</a> | <a href="#">InterPro</a>              |
| AA43_10595                   | <a href="#">ALK06732</a> | histidine kinase [Methanosarcina sp. 795]... | <a href="#">CDD</a> | <a href="#">UniProt</a> | <a href="#">Pfam</a> | <a href="#">InterPro</a>              |
| AA43_12700                   | <a href="#">ALK06779</a> | hypothetical protein AAY43_12700 [Methano... | <a href="#">CDD</a> | <a href="#">UniProt</a> | <a href="#">Pfam</a> | <a href="#">InterPro</a>              |
| <b>REC only</b>              |                          |                                              |                     |                         |                      |                                       |
| AA43_02695                   | <a href="#">ALK04804</a> | chemotaxis protein CheY [Methanosarcina s... | <a href="#">CDD</a> | <a href="#">UniProt</a> | <a href="#">Pfam</a> | <a href="#">InterPro</a>              |
| AA43_03150                   | <a href="#">ALK04873</a> | chemotaxis protein CheY [Methanosarcina s... | <a href="#">CDD</a> | <a href="#">UniProt</a> | <a href="#">Pfam</a> | <a href="#">InterPro</a>              |
| AA43_03155                   | <a href="#">ALK04874</a> | response regulator receiver protein [Meth... | <a href="#">CDD</a> | <a href="#">UniProt</a> | <a href="#">Pfam</a> | <a href="#">InterPro</a>              |
| AA43_08795                   | <a href="#">ALK05775</a> | response regulator [Methanosarcina sp. 79... | <a href="#">CDD</a> | <a href="#">UniProt</a> | <a href="#">Pfam</a> | <a href="#">InterPro</a>              |
| AA43_09105                   | <a href="#">ALK06687</a> | chemotaxis protein CheY [Methanosarcina s... | <a href="#">CDD</a> | <a href="#">UniProt</a> | <a href="#">Pfam</a> | <a href="#">InterPro</a>              |
| AA43_11180                   | <a href="#">ALK06748</a> | chemotaxis protein CheY [Methanosarcina s... | <a href="#">CDD</a> | <a href="#">UniProt</a> | <a href="#">Pfam</a> | <a href="#">InterPro</a>              |
| AA43_11185                   | <a href="#">ALK06147</a> | chemotaxis protein CheY [Methanosarcina s... | <a href="#">CDD</a> | <a href="#">UniProt</a> | <a href="#">Pfam</a> | <a href="#">InterPro</a>              |
| AA43_11925                   | <a href="#">ALK06257</a> | response regulator receiver protein [Meth... | <a href="#">CDD</a> | <a href="#">UniProt</a> | <a href="#">Pfam</a> | <a href="#">InterPro</a>              |
| AA43_12190                   | <a href="#">ALK06302</a> | chemotaxis protein CheY [Methanosarcina s... | <a href="#">CDD</a> | <a href="#">UniProt</a> | <a href="#">Pfam</a> | <a href="#">InterPro</a>              |
| AA43_12695                   | <a href="#">ALK06378</a> | chemotaxis protein CheY [Methanosarcina s... | <a href="#">CDD</a> | <a href="#">UniProt</a> | <a href="#">Pfam</a> | <a href="#">InterPro</a>              |
| <b>FrzZ family (REC-REC)</b> |                          |                                              |                     |                         |                      |                                       |
| AA43_02690                   | <a href="#">ALK04803</a> | hypothetical protein AAY43_02690 [Methano... | <a href="#">CDD</a> | <a href="#">UniProt</a> | <a href="#">Pfam</a> | <a href="#">InterPro</a> (REC-REC)    |
| <b>REC-CheB</b>              |                          |                                              |                     |                         |                      |                                       |
| AA43_03145                   | <a href="#">ALK04872</a> | chemotaxis protein CheY [Methanosarcina s... | <a href="#">CDD</a> | <a href="#">UniProt</a> | <a href="#">Pfam</a> | <a href="#">InterPro</a>              |
| <b>wHTH-REC</b>              |                          |                                              |                     |                         |                      |                                       |
| AA43_09385                   | <a href="#">ALK05869</a> | response regulator receiver protein [Meth... | <a href="#">CDD</a> | <a href="#">UniProt</a> | <a href="#">Pfam</a> | <a href="#">InterPro</a>              |
| <b>REC-MetOD1</b>            |                          |                                              |                     |                         |                      |                                       |
| AA43_09910                   | <a href="#">ALK05954</a> | response regulator receiver protein [Meth... | <a href="#">CDD</a> | <a href="#">UniProt</a> | <a href="#">Pfam</a> | <a href="#">InterPro</a> (REC-MetOD1) |

### Methanosarcina sp. Kolksee

|                     |                          |                                               |                     |                         |                      |                          |
|---------------------|--------------------------|-----------------------------------------------|---------------------|-------------------------|----------------------|--------------------------|
| <b>HisK, no REC</b> |                          |                                               |                     |                         |                      |                          |
| MSKOL_0340          | <a href="#">AKB46117</a> | sensory transduction histidine kinase [Met... | <a href="#">CDD</a> | <a href="#">UniProt</a> | <a href="#">Pfam</a> | <a href="#">InterPro</a> |
| MSKOL_0357          | <a href="#">AKB46134</a> | Signal-transducing histidine kinase [Metha... | <a href="#">CDD</a> | <a href="#">UniProt</a> | <a href="#">Pfam</a> | <a href="#">InterPro</a> |
| MSKOL_0564          | <a href="#">AKB46341</a> | Sensory transduction histidine kinase [Met... | <a href="#">CDD</a> | <a href="#">UniProt</a> | <a href="#">Pfam</a> | <a href="#">InterPro</a> |
| MSKOL_1045          | <a href="#">AKB46822</a> | Sensory transduction histidine kinase [Met... | <a href="#">CDD</a> | <a href="#">UniProt</a> | <a href="#">Pfam</a> | <a href="#">InterPro</a> |
| MSKOL_1121          | <a href="#">AKB46898</a> | sensory transduction histidine kinase [Met... | <a href="#">CDD</a> | <a href="#">UniProt</a> | <a href="#">Pfam</a> | <a href="#">InterPro</a> |
| MSKOL_1240          | <a href="#">AKB47017</a> | sensory transduction histidine kinase [Met... | <a href="#">CDD</a> | <a href="#">UniProt</a> | <a href="#">Pfam</a> | <a href="#">InterPro</a> |
| MSKOL_1260          | <a href="#">AKB47037</a> | Sensory transduction histidine kinase [Met... | <a href="#">CDD</a> | <a href="#">UniProt</a> | <a href="#">Pfam</a> | <a href="#">InterPro</a> |
| MSKOL_1422          | <a href="#">AKB47199</a> | sensory transduction histidine kinase [Met... | <a href="#">CDD</a> | <a href="#">UniProt</a> | <a href="#">Pfam</a> | <a href="#">InterPro</a> |
| MSKOL_1484          | <a href="#">AKB47261</a> | sensory transduction histidine kinase [Met... | <a href="#">CDD</a> | <a href="#">UniProt</a> | <a href="#">Pfam</a> | <a href="#">InterPro</a> |
| MSKOL_1522          | <a href="#">AKB47299</a> | sensory transduction histidine kinase [Met... | <a href="#">CDD</a> | <a href="#">UniProt</a> | <a href="#">Pfam</a> | <a href="#">InterPro</a> |
| MSKOL_1935          | <a href="#">AKB47712</a> | sensory transduction histidine kinase [Met... | <a href="#">CDD</a> | <a href="#">UniProt</a> | <a href="#">Pfam</a> | <a href="#">InterPro</a> |
| MSKOL_1981          | <a href="#">AKB47758</a> | sensory transduction histidine kinase [Met... | <a href="#">CDD</a> | <a href="#">UniProt</a> | <a href="#">Pfam</a> | <a href="#">InterPro</a> |
| MSKOL_2142          | <a href="#">AKB47919</a> | sensory transduction histidine kinase [Met... | <a href="#">CDD</a> | <a href="#">UniProt</a> | <a href="#">Pfam</a> | <a href="#">InterPro</a> |
| MSKOL_2550          | <a href="#">AKB48327</a> | sensory transduction histidine kinase [Met... | <a href="#">CDD</a> | <a href="#">UniProt</a> | <a href="#">Pfam</a> | <a href="#">InterPro</a> |
| MSKOL_2674          | <a href="#">AKB48451</a> | Sensory transduction histidine kinase [Met... | <a href="#">CDD</a> | <a href="#">UniProt</a> | <a href="#">Pfam</a> | <a href="#">InterPro</a> |
| MSKOL_2698          | <a href="#">AKB48475</a> | sensory transduction histidine kinase [Met... | <a href="#">CDD</a> | <a href="#">UniProt</a> | <a href="#">Pfam</a> | <a href="#">InterPro</a> |
| MSKOL_2796          | <a href="#">AKB48573</a> | sensory transduction histidine kinase [Met... | <a href="#">CDD</a> | <a href="#">UniProt</a> | <a href="#">Pfam</a> | <a href="#">InterPro</a> |
| MSKOL_3109          | <a href="#">AKB48886</a> | sensory transduction histidine kinase [Met... | <a href="#">CDD</a> | <a href="#">UniProt</a> | <a href="#">Pfam</a> | <a href="#">InterPro</a> |
| MSKOL_3208          | <a href="#">AKB48985</a> | Sensory transduction histidine kinase [Met... | <a href="#">CDD</a> | <a href="#">UniProt</a> | <a href="#">Pfam</a> | <a href="#">InterPro</a> |
| MSKOL_3471          | <a href="#">AKB49248</a> | Signal transduction histidine kinase CheA ... | <a href="#">CDD</a> | <a href="#">UniProt</a> | <a href="#">Pfam</a> | <a href="#">InterPro</a> |
| <b>Hybrid HisK</b>  |                          |                                               |                     |                         |                      |                          |
| MSKOL_0213          | <a href="#">AKB45990</a> | Sensory transduction histidine kinase [Met... | <a href="#">CDD</a> | <a href="#">UniProt</a> | <a href="#">Pfam</a> | <a href="#">InterPro</a> |
| <b>REC only</b>     |                          |                                               |                     |                         |                      |                          |
| MSKOL_0214          | <a href="#">AKB45991</a> | Two-component response regulator [Methanos... | <a href="#">CDD</a> | <a href="#">UniProt</a> | <a href="#">Pfam</a> | <a href="#">InterPro</a> |
| MSKOL_1042          | <a href="#">AKB46819</a> | response regulator receiver [Methanosarcin... | <a href="#">CDD</a> | <a href="#">UniProt</a> | <a href="#">Pfam</a> | <a href="#">InterPro</a> |
| MSKOL_1044          | <a href="#">AKB46821</a> | response regulator receiver [Methanosarcin... | <a href="#">CDD</a> | <a href="#">UniProt</a> | <a href="#">Pfam</a> | <a href="#">InterPro</a> |

|                   |                          |                                               |     |                         |                      |                                       |
|-------------------|--------------------------|-----------------------------------------------|-----|-------------------------|----------------------|---------------------------------------|
| MSKOL_1521        | <a href="#">AKB47298</a> | Two-component system response regulator [M... | CDD | <a href="#">UniProt</a> | <a href="#">Pfam</a> | <a href="#">InterPro</a>              |
| MSKOL_1767        | <a href="#">AKB47544</a> | response regulator receiver [Methanosarcin... | CDD | <a href="#">UniProt</a> | <a href="#">Pfam</a> | <a href="#">InterPro</a>              |
| MSKOL_1807        | <a href="#">AKB47584</a> | response regulator receiver [Methanosarcin... | CDD | <a href="#">UniProt</a> | <a href="#">Pfam</a> | <a href="#">InterPro</a>              |
| MSKOL_2198        | <a href="#">AKB47975</a> | Chemotaxis regulator - transmits chemorece... | CDD | <a href="#">UniProt</a> | <a href="#">Pfam</a> | <a href="#">InterPro</a>              |
| MSKOL_2358        | <a href="#">AKB48135</a> | Response regulator receiver [Methanosarcin... | CDD | <a href="#">UniProt</a> | <a href="#">Pfam</a> | <a href="#">InterPro</a>              |
| MSKOL_2859        | <a href="#">AKB48636</a> | Chemotaxis regulator - transmits chemorece... | CDD | <a href="#">UniProt</a> | <a href="#">Pfam</a> | <a href="#">InterPro</a>              |
| MSKOL_3468        | <a href="#">AKB49245</a> | Two-component response regulator [Methanos... | CDD | <a href="#">UniProt</a> | <a href="#">Pfam</a> | <a href="#">InterPro</a>              |
| MSKOL_3469        | <a href="#">AKB49246</a> | Chemotaxis regulator - transmits chemorece... | CDD | <a href="#">UniProt</a> | <a href="#">Pfam</a> | <a href="#">InterPro</a>              |
| <b>REC-HisK</b>   |                          |                                               |     |                         |                      |                                       |
| MSKOL_1520        | <a href="#">AKB47297</a> | Sensory transduction histidine kinase [Met... | CDD | <a href="#">UniProt</a> | <a href="#">Pfam</a> | <a href="#">InterPro</a>              |
| <b>REC-CheB</b>   |                          |                                               |     |                         |                      |                                       |
| MSKOL_3470        | <a href="#">AKB49247</a> | Chemotaxis response regulator protein-glut... | CDD | <a href="#">UniProt</a> | <a href="#">Pfam</a> | <a href="#">InterPro</a>              |
| <b>wHTH-REC</b>   |                          |                                               |     |                         |                      |                                       |
| MSKOL_1760        | <a href="#">AKB47537</a> | response regulator receiver [Methanosarcin... | CDD | <a href="#">UniProt</a> | <a href="#">Pfam</a> | <a href="#">InterPro</a>              |
| <b>REC-MetOD1</b> |                          |                                               |     |                         |                      |                                       |
| MSKOL_2267        | <a href="#">AKB48044</a> | Response regulator receiver [Methanosarcin... | CDD | <a href="#">UniProt</a> | <a href="#">Pfam</a> | <a href="#">InterPro</a> (REC-MetOD1) |

### Methanosarcina sp. MTP4

#### **HisK, no REC**

|            |                          |                                               |     |                         |                      |                          |
|------------|--------------------------|-----------------------------------------------|-----|-------------------------|----------------------|--------------------------|
| MSMTP_0085 | <a href="#">AKB23554</a> | hypothetical protein MSMTP_0085 [Methanosa... | CDD | <a href="#">UniProt</a> | <a href="#">Pfam</a> | <a href="#">InterPro</a> |
| MSMTP_0414 | <a href="#">AKB23883</a> | hypothetical protein MSMTP_0414 [Methanosa... | CDD | <a href="#">UniProt</a> | <a href="#">Pfam</a> | <a href="#">InterPro</a> |
| MSMTP_0825 | <a href="#">AKB24294</a> | sensory transduction histidine kinase [Met... | CDD | <a href="#">UniProt</a> | <a href="#">Pfam</a> | <a href="#">InterPro</a> |
| MSMTP_0939 | <a href="#">AKB24408</a> | sensory transduction histidine kinase [Met... | CDD | <a href="#">UniProt</a> | <a href="#">Pfam</a> | <a href="#">InterPro</a> |
| MSMTP_0940 | <a href="#">AKB24409</a> | sensory transduction histidine kinase [Met... | CDD | <a href="#">UniProt</a> | <a href="#">Pfam</a> | <a href="#">InterPro</a> |
| MSMTP_0942 | <a href="#">AKB24411</a> | sensory transduction histidine kinase [Met... | CDD | <a href="#">UniProt</a> | <a href="#">Pfam</a> | <a href="#">InterPro</a> |
| MSMTP_0943 | <a href="#">AKB24412</a> | sensory transduction histidine kinase [Met... | CDD | <a href="#">UniProt</a> | <a href="#">Pfam</a> | <a href="#">InterPro</a> |
| MSMTP_1396 | <a href="#">AKB24865</a> | sensory transduction histidine kinase [Met... | CDD | <a href="#">UniProt</a> | <a href="#">Pfam</a> | <a href="#">InterPro</a> |
| MSMTP_1411 | <a href="#">AKB24880</a> | sensory transduction histidine kinase [Met... | CDD | <a href="#">UniProt</a> | <a href="#">Pfam</a> | <a href="#">InterPro</a> |
| MSMTP_1460 | <a href="#">AKB24929</a> | sensory transduction histidine kinase [Met... | CDD | <a href="#">UniProt</a> | <a href="#">Pfam</a> | <a href="#">InterPro</a> |
| MSMTP_1504 | <a href="#">AKB24973</a> | sensory transduction histidine kinase [Met... | CDD | <a href="#">UniProt</a> | <a href="#">Pfam</a> | <a href="#">InterPro</a> |
| MSMTP_1620 | <a href="#">AKB25089</a> | hypothetical protein MSMTP_1620 [Methanosa... | CDD | <a href="#">UniProt</a> | <a href="#">Pfam</a> | <a href="#">InterPro</a> |
| MSMTP_1623 | <a href="#">AKB25092</a> | Sensory transduction histidine kinase [Met... | CDD | <a href="#">UniProt</a> | <a href="#">Pfam</a> | <a href="#">InterPro</a> |
| MSMTP_1695 | <a href="#">AKB25164</a> | sensory transduction histidine kinase [Met... | CDD | <a href="#">UniProt</a> | <a href="#">Pfam</a> | <a href="#">InterPro</a> |
| MSMTP_1707 | <a href="#">AKB25176</a> | Sensory transduction histidine kinase [Met... | CDD | <a href="#">UniProt</a> | <a href="#">Pfam</a> | <a href="#">InterPro</a> |
| MSMTP_1722 | <a href="#">AKB25191</a> | sensory transduction histidine kinase [Met... | CDD | <a href="#">UniProt</a> | <a href="#">Pfam</a> | <a href="#">InterPro</a> |
| MSMTP_1802 | <a href="#">AKB25271</a> | hypothetical protein MSMTP_1802 [Methanosa... | CDD | <a href="#">UniProt</a> | <a href="#">Pfam</a> | <a href="#">InterPro</a> |
| MSMTP_1803 | <a href="#">AKB25272</a> | sensory transduction histidine kinase [Met... | CDD | <a href="#">UniProt</a> | <a href="#">Pfam</a> | <a href="#">InterPro</a> |
| MSMTP_1820 | <a href="#">AKB25289</a> | sensory transduction histidine kinase [Met... | CDD | <a href="#">UniProt</a> | <a href="#">Pfam</a> | <a href="#">InterPro</a> |
| MSMTP_2016 | <a href="#">AKB25485</a> | sensory transduction histidine kinase [Met... | CDD | <a href="#">UniProt</a> | <a href="#">Pfam</a> | <a href="#">InterPro</a> |
| MSMTP_2352 | <a href="#">AKB25821</a> | sensory transduction histidine kinase [Met... | CDD | <a href="#">UniProt</a> | <a href="#">Pfam</a> | <a href="#">InterPro</a> |
| MSMTP_2594 | <a href="#">AKB26063</a> | hypothetical protein MSMTP_2594 [Methanosa... | CDD | <a href="#">UniProt</a> | <a href="#">Pfam</a> | <a href="#">InterPro</a> |
| MSMTP_2661 | <a href="#">AKB26130</a> | Signal-transducing histidine kinase [Metha... | CDD | <a href="#">UniProt</a> | <a href="#">Pfam</a> | <a href="#">InterPro</a> |
| MSMTP_2667 | <a href="#">AKB26136</a> | Signal-transducing histidine kinase [Metha... | CDD | <a href="#">UniProt</a> | <a href="#">Pfam</a> | <a href="#">InterPro</a> |
| MSMTP_2678 | <a href="#">AKB26147</a> | sensory transduction histidine kinase [Met... | CDD | <a href="#">UniProt</a> | <a href="#">Pfam</a> | <a href="#">InterPro</a> |
| MSMTP_3240 | <a href="#">AKB26709</a> | Signal transduction histidine kinase CheA ... | CDD | <a href="#">UniProt</a> | <a href="#">Pfam</a> | <a href="#">InterPro</a> |

#### **Hybrid HisK**

|            |                          |                                               |     |                         |                      |                          |
|------------|--------------------------|-----------------------------------------------|-----|-------------------------|----------------------|--------------------------|
| MSMTP_0269 | <a href="#">AKB23738</a> | sensory transduction histidine kinase [Met... | CDD | <a href="#">UniProt</a> | <a href="#">Pfam</a> | <a href="#">InterPro</a> |
| MSMTP_1703 | <a href="#">AKB25172</a> | Two-component sensor histidine kinase PleC... | CDD | <a href="#">UniProt</a> | <a href="#">Pfam</a> | <a href="#">InterPro</a> |

#### **REC only**

|             |                          |                                              |     |                         |                      |                          |
|-------------|--------------------------|----------------------------------------------|-----|-------------------------|----------------------|--------------------------|
| MSMTP_0270  | <a href="#">AKB23739</a> | Two-component response regulator [Methano... | CDD | <a href="#">UniProt</a> | <a href="#">Pfam</a> | <a href="#">InterPro</a> |
| MSMTP_0938  | <a href="#">AKB24407</a> | response regulator receiver [Methanosarci... | CDD | <a href="#">UniProt</a> | <a href="#">Pfam</a> | <a href="#">InterPro</a> |
| MSMTP_0941  | <a href="#">AKB24410</a> | response regulator receiver [Methanosarci... | CDD | <a href="#">UniProt</a> | <a href="#">Pfam</a> | <a href="#">InterPro</a> |
| MSMTP_1102  | <a href="#">AKB24571</a> | response regulator receiver [Methanosarci... | CDD | <a href="#">UniProt</a> | <a href="#">Pfam</a> | <a href="#">InterPro</a> |
| MSMTP_1454  | <a href="#">AKB24923</a> | multi-sensor signal transduction histidin... | CDD | <a href="#">UniProt</a> | <a href="#">Pfam</a> | <a href="#">InterPro</a> |
| MSMTP_1455  | <a href="#">AKB24924</a> | multi-sensor signal transduction histidin... | CDD | <a href="#">UniProt</a> | <a href="#">Pfam</a> | <a href="#">InterPro</a> |
| MSMTP_1621  | <a href="#">AKB25090</a> | response regulator receiver [Methanosarci... | CDD | <a href="#">UniProt</a> | <a href="#">Pfam</a> | <a href="#">InterPro</a> |
| MSMTP_1624  | <a href="#">AKB25093</a> | response regulator receiver [Methanosarci... | CDD | <a href="#">UniProt</a> | <a href="#">Pfam</a> | <a href="#">InterPro</a> |
| MSMTP_1625  | <a href="#">AKB25094</a> | response regulator receiver [Methanosarci... | CDD | <a href="#">UniProt</a> | <a href="#">Pfam</a> | <a href="#">InterPro</a> |
| MSMTP_1704  | <a href="#">AKB25173</a> | Two-component response regulator [Methano... | CDD | <a href="#">UniProt</a> | <a href="#">Pfam</a> | <a href="#">InterPro</a> |
| MSMTP_2159  | <a href="#">AKB25628</a> | Pole remodelling regulatory diguanylate c... | CDD | <a href="#">UniProt</a> | <a href="#">Pfam</a> | <a href="#">InterPro</a> |
| MSMTP_3237  | <a href="#">AKB26706</a> | response regulator receiver [Methanosarci... | CDD | <a href="#">UniProt</a> | <a href="#">Pfam</a> | <a href="#">InterPro</a> |
| MSMTP_3238  | <a href="#">AKB26707</a> | Chemotaxis regulator - transmits chemorec... | CDD | <a href="#">UniProt</a> | <a href="#">Pfam</a> | <a href="#">InterPro</a> |
| *MSMTP_1456 | <a href="#">AKB24925</a> | sensory transduction histidine kinase [Me... | CDD | <a href="#">UniProt</a> | <a href="#">Pfam</a> | <a href="#">InterPro</a> |

#### **REC-HisK**

|            |                          |                                              |     |                         |                      |                          |
|------------|--------------------------|----------------------------------------------|-----|-------------------------|----------------------|--------------------------|
| MSMTP_1293 | <a href="#">AKB24762</a> | hypothetical protein MSMTP_1293 [Methanos... | CDD | <a href="#">UniProt</a> | <a href="#">Pfam</a> | <a href="#">InterPro</a> |
|------------|--------------------------|----------------------------------------------|-----|-------------------------|----------------------|--------------------------|

#### **REC-CheB**

|            |                          |                                              |     |                         |                      |                          |
|------------|--------------------------|----------------------------------------------|-----|-------------------------|----------------------|--------------------------|
| MSMTP_3239 | <a href="#">AKB26708</a> | Chemotaxis response regulator protein-glu... | CDD | <a href="#">UniProt</a> | <a href="#">Pfam</a> | <a href="#">InterPro</a> |
|------------|--------------------------|----------------------------------------------|-----|-------------------------|----------------------|--------------------------|

#### **REC-MetOD1**

|            |                          |                                              |     |                         |                      |                                       |
|------------|--------------------------|----------------------------------------------|-----|-------------------------|----------------------|---------------------------------------|
| MSMTP_1866 | <a href="#">AKB25335</a> | Response regulator receiver [Methanosarci... | CDD | <a href="#">UniProt</a> | <a href="#">Pfam</a> | <a href="#">InterPro</a> (REC-MetOD1) |
|------------|--------------------------|----------------------------------------------|-----|-------------------------|----------------------|---------------------------------------|

### Methanosarcina sp. WH1

#### **HisK, no REC**

|            |                          |                                               |     |                         |                      |                          |
|------------|--------------------------|-----------------------------------------------|-----|-------------------------|----------------------|--------------------------|
| MSWH1_0255 | <a href="#">AKB20526</a> | sensory transduction histidine kinase [Met... | CDD | <a href="#">UniProt</a> | <a href="#">Pfam</a> | <a href="#">InterPro</a> |
| MSWH1_1026 | <a href="#">AKB21297</a> | sensory transduction histidine kinase [Met... | CDD | <a href="#">UniProt</a> | <a href="#">Pfam</a> | <a href="#">InterPro</a> |
| MSWH1_1081 | <a href="#">AKB21352</a> | sensory transduction histidine kinase [Met... | CDD | <a href="#">UniProt</a> | <a href="#">Pfam</a> | <a href="#">InterPro</a> |
| MSWH1_1350 | <a href="#">AKB21621</a> | sensory transduction histidine kinase [Met... | CDD | <a href="#">UniProt</a> | <a href="#">Pfam</a> | <a href="#">InterPro</a> |
| MSWH1_1353 | <a href="#">AKB21624</a> | sensory transduction histidine kinase [Met... | CDD | <a href="#">UniProt</a> | <a href="#">Pfam</a> | <a href="#">InterPro</a> |



|                          |                          |                                               |                     |                         |                      |                                       |
|--------------------------|--------------------------|-----------------------------------------------|---------------------|-------------------------|----------------------|---------------------------------------|
| MSWH1_1358               | <a href="#">AKB21629</a> | Sensory transduction histidine kinase [Met... | <a href="#">CDD</a> | <a href="#">UniProt</a> | <a href="#">Pfam</a> | <a href="#">InterPro</a>              |
| MSWH1_1483               | <a href="#">AKB21754</a> | Sensory transduction histidine kinase [Met... | <a href="#">CDD</a> | <a href="#">UniProt</a> | <a href="#">Pfam</a> | <a href="#">InterPro</a>              |
| MSWH1_1616               | <a href="#">AKB21887</a> | Sensory transduction histidine kinase [Met... | <a href="#">CDD</a> | <a href="#">UniProt</a> | <a href="#">Pfam</a> | <a href="#">InterPro</a>              |
| MSWH1_1618               | <a href="#">AKB21889</a> | sensory transduction histidine kinase [Met... | <a href="#">CDD</a> | <a href="#">UniProt</a> | <a href="#">Pfam</a> | <a href="#">InterPro</a>              |
| MSWH1_1636               | <a href="#">AKB21907</a> | sensory transduction histidine kinase [Met... | <a href="#">CDD</a> | <a href="#">UniProt</a> | <a href="#">Pfam</a> | <a href="#">InterPro</a>              |
| MSWH1_1705               | <a href="#">AKB21976</a> | sensory transduction histidine kinase [Met... | <a href="#">CDD</a> | <a href="#">UniProt</a> | <a href="#">Pfam</a> | <a href="#">InterPro</a>              |
| MSWH1_1972               | <a href="#">AKB22243</a> | sensory transduction histidine kinase [Met... | <a href="#">CDD</a> | <a href="#">UniProt</a> | <a href="#">Pfam</a> | <a href="#">InterPro</a>              |
| MSWH1_1991               | <a href="#">AKB22262</a> | sensory transduction histidine kinase [Met... | <a href="#">CDD</a> | <a href="#">UniProt</a> | <a href="#">Pfam</a> | <a href="#">InterPro</a>              |
| MSWH1_2005               | <a href="#">AKB22276</a> | sensory transduction histidine kinase [Met... | <a href="#">CDD</a> | <a href="#">UniProt</a> | <a href="#">Pfam</a> | <a href="#">InterPro</a>              |
| MSWH1_2555               | <a href="#">AKB22826</a> | sensory transduction histidine kinase [Met... | <a href="#">CDD</a> | <a href="#">UniProt</a> | <a href="#">Pfam</a> | <a href="#">InterPro</a>              |
| MSWH1_2628               | <a href="#">AKB22899</a> | Signal-transducing histidine kinase [Metha... | <a href="#">CDD</a> | <a href="#">UniProt</a> | <a href="#">Pfam</a> | <a href="#">InterPro</a>              |
| MSWH1_2751               | <a href="#">AKB23022</a> | sensory transduction histidine kinase [Met... | <a href="#">CDD</a> | <a href="#">UniProt</a> | <a href="#">Pfam</a> | <a href="#">InterPro</a>              |
| MSWH1_2761               | <a href="#">AKB23032</a> | sensory transduction histidine kinase [Met... | <a href="#">CDD</a> | <a href="#">UniProt</a> | <a href="#">Pfam</a> | <a href="#">InterPro</a>              |
| MSWH1_2864               | <a href="#">AKB23135</a> | sensory transduction histidine kinase [Met... | <a href="#">CDD</a> | <a href="#">UniProt</a> | <a href="#">Pfam</a> | <a href="#">InterPro</a>              |
| MSWH1_3188               | <a href="#">AKB23459</a> | Signal transduction histidine kinase CheA ... | <a href="#">CDD</a> | <a href="#">UniProt</a> | <a href="#">Pfam</a> | <a href="#">InterPro</a>              |
| <b>Hybrid HisK</b>       |                          |                                               |                     |                         |                      |                                       |
| MSWH1_1194               | <a href="#">AKB21465</a> | hypothetical protein MSWH1_1194 [Methanos...  | <a href="#">CDD</a> | <a href="#">UniProt</a> | <a href="#">Pfam</a> | <a href="#">InterPro</a>              |
| MSWH1_1671               | <a href="#">AKB21942</a> | sensory transduction histidine kinase [Me...  | <a href="#">CDD</a> | <a href="#">UniProt</a> | <a href="#">Pfam</a> | <a href="#">InterPro</a>              |
| <b>HisKA, no HATPase</b> |                          |                                               |                     |                         |                      |                                       |
| MSWH1_2372               | <a href="#">AKB22643</a> | Two component system histidine kinase [Met... | <a href="#">CDD</a> | <a href="#">UniProt</a> | <a href="#">Pfam</a> | <a href="#">InterPro</a>              |
| <b>REC only</b>          |                          |                                               |                     |                         |                      |                                       |
| MSWH1_0476               | <a href="#">AKB20747</a> | Two-component response regulator [Methano...  | <a href="#">CDD</a> | <a href="#">UniProt</a> | <a href="#">Pfam</a> | <a href="#">InterPro</a>              |
| MSWH1_1193               | <a href="#">AKB21464</a> | GGDEF/response regulator receiver domain ...  | <a href="#">CDD</a> | <a href="#">UniProt</a> | <a href="#">Pfam</a> | <a href="#">InterPro</a>              |
| MSWH1_1354               | <a href="#">AKB21625</a> | response regulator receiver [Methanosarci...  | <a href="#">CDD</a> | <a href="#">UniProt</a> | <a href="#">Pfam</a> | <a href="#">InterPro</a>              |
| MSWH1_1501               | <a href="#">AKB21772</a> | Response regulator receiver [Methanosarci...  | <a href="#">CDD</a> | <a href="#">UniProt</a> | <a href="#">Pfam</a> | <a href="#">InterPro</a>              |
| *MSWH1_1502              | <a href="#">AKB21773</a> | sensory transduction histidine kinase [Me...  | <a href="#">CDD</a> | <a href="#">UniProt</a> | <a href="#">Pfam</a> | <a href="#">InterPro</a>              |
| MSWH1_1572               | <a href="#">AKB21843</a> | Two-component response regulator [Methano...  | <a href="#">CDD</a> | <a href="#">UniProt</a> | <a href="#">Pfam</a> | <a href="#">InterPro</a>              |
| MSWH1_1614               | <a href="#">AKB21885</a> | response regulator receiver [Methanosarci...  | <a href="#">CDD</a> | <a href="#">UniProt</a> | <a href="#">Pfam</a> | <a href="#">InterPro</a>              |
| MSWH1_1615               | <a href="#">AKB21886</a> | response regulator receiver [Methanosarci...  | <a href="#">CDD</a> | <a href="#">UniProt</a> | <a href="#">Pfam</a> | <a href="#">InterPro</a>              |
| MSWH1_1672               | <a href="#">AKB21943</a> | response regulator receiver [Methanosarci...  | <a href="#">CDD</a> | <a href="#">UniProt</a> | <a href="#">Pfam</a> | <a href="#">InterPro</a>              |
| MSWH1_1673               | <a href="#">AKB21944</a> | Response regulator receiver [Methanosarci...  | <a href="#">CDD</a> | <a href="#">UniProt</a> | <a href="#">Pfam</a> | <a href="#">InterPro</a>              |
| MSWH1_3185               | <a href="#">AKB23456</a> | Two-component response regulator [Methano...  | <a href="#">CDD</a> | <a href="#">UniProt</a> | <a href="#">Pfam</a> | <a href="#">InterPro</a>              |
| MSWH1_3186               | <a href="#">AKB23457</a> | Chemotaxis regulator - transmits chemorec...  | <a href="#">CDD</a> | <a href="#">UniProt</a> | <a href="#">Pfam</a> | <a href="#">InterPro</a>              |
| *MSWH1_0475              | <a href="#">AKB20746</a> | sensory transduction histidine kinase [Me...  | <a href="#">CDD</a> | <a href="#">UniProt</a> | <a href="#">Pfam</a> | <a href="#">InterPro</a>              |
| *MSWH1_1574              | <a href="#">AKB21845</a> | sensory transduction histidine kinase [Me...  | <a href="#">CDD</a> | <a href="#">UniProt</a> | <a href="#">Pfam</a> | <a href="#">InterPro</a>              |
| <b>REC-HisK</b>          |                          |                                               |                     |                         |                      |                                       |
| MSWH1_1869               | <a href="#">AKB22140</a> | hypothetical protein MSWH1_1869 [Methanos...  | <a href="#">CDD</a> | <a href="#">UniProt</a> | <a href="#">Pfam</a> | <a href="#">InterPro</a>              |
| <b>REC-CheB</b>          |                          |                                               |                     |                         |                      |                                       |
| MSWH1_3187               | <a href="#">AKB23458</a> | Chemotaxis response regulator protein-glu...  | <a href="#">CDD</a> | <a href="#">UniProt</a> | <a href="#">Pfam</a> | <a href="#">InterPro</a>              |
| <b>wHTH-REC</b>          |                          |                                               |                     |                         |                      |                                       |
| MSWH1_2295               | <a href="#">AKB22566</a> | Phosphate regulon transcriptional regulat...  | <a href="#">CDD</a> | <a href="#">UniProt</a> | <a href="#">Pfam</a> | <a href="#">InterPro</a>              |
| <b>REC-MetOD1</b>        |                          |                                               |                     |                         |                      |                                       |
| MSWH1_1245               | <a href="#">AKB21516</a> | Response regulator receiver [Methanosarci...  | <a href="#">CDD</a> | <a href="#">UniProt</a> | <a href="#">Pfam</a> | <a href="#">InterPro</a> (REC-MetOD1) |

#### Methanosarcina sp. WMM596

|                          |                          |                                               |                     |                         |                      |                          |
|--------------------------|--------------------------|-----------------------------------------------|---------------------|-------------------------|----------------------|--------------------------|
| MSWHS_0265               | <a href="#">AKB17128</a> | sensory transduction histidine kinase [Met... | <a href="#">CDD</a> | <a href="#">UniProt</a> | <a href="#">Pfam</a> | <a href="#">InterPro</a> |
| MSWHS_1097               | <a href="#">AKB17960</a> | sensory transduction histidine kinase [Met... | <a href="#">CDD</a> | <a href="#">UniProt</a> | <a href="#">Pfam</a> | <a href="#">InterPro</a> |
| MSWHS_1150               | <a href="#">AKB18013</a> | sensory transduction histidine kinase [Met... | <a href="#">CDD</a> | <a href="#">UniProt</a> | <a href="#">Pfam</a> | <a href="#">InterPro</a> |
| MSWHS_1439               | <a href="#">AKB18302</a> | sensory transduction histidine kinase [Met... | <a href="#">CDD</a> | <a href="#">UniProt</a> | <a href="#">Pfam</a> | <a href="#">InterPro</a> |
| MSWHS_1608               | <a href="#">AKB18471</a> | sensory transduction histidine kinase [Met... | <a href="#">CDD</a> | <a href="#">UniProt</a> | <a href="#">Pfam</a> | <a href="#">InterPro</a> |
| MSWHS_1664               | <a href="#">AKB18527</a> | sensory transduction histidine kinase [Met... | <a href="#">CDD</a> | <a href="#">UniProt</a> | <a href="#">Pfam</a> | <a href="#">InterPro</a> |
| MSWHS_1683               | <a href="#">AKB18546</a> | sensory transduction histidine kinase [Met... | <a href="#">CDD</a> | <a href="#">UniProt</a> | <a href="#">Pfam</a> | <a href="#">InterPro</a> |
| MSWHS_1685               | <a href="#">AKB18548</a> | Sensory transduction histidine kinase [Met... | <a href="#">CDD</a> | <a href="#">UniProt</a> | <a href="#">Pfam</a> | <a href="#">InterPro</a> |
| MSWHS_1848               | <a href="#">AKB18711</a> | Sensory transduction histidine kinase [Met... | <a href="#">CDD</a> | <a href="#">UniProt</a> | <a href="#">Pfam</a> | <a href="#">InterPro</a> |
| MSWHS_2128               | <a href="#">AKB18991</a> | sensory transduction histidine kinase [Met... | <a href="#">CDD</a> | <a href="#">UniProt</a> | <a href="#">Pfam</a> | <a href="#">InterPro</a> |
| MSWHS_2277               | <a href="#">AKB19140</a> | sensory transduction histidine kinase [Met... | <a href="#">CDD</a> | <a href="#">UniProt</a> | <a href="#">Pfam</a> | <a href="#">InterPro</a> |
| MSWHS_2287               | <a href="#">AKB19150</a> | sensory transduction histidine kinase [Met... | <a href="#">CDD</a> | <a href="#">UniProt</a> | <a href="#">Pfam</a> | <a href="#">InterPro</a> |
| MSWHS_2410               | <a href="#">AKB19273</a> | Signal-transducing histidine kinase [Metha... | <a href="#">CDD</a> | <a href="#">UniProt</a> | <a href="#">Pfam</a> | <a href="#">InterPro</a> |
| MSWHS_2483               | <a href="#">AKB19346</a> | sensory transduction histidine kinase [Met... | <a href="#">CDD</a> | <a href="#">UniProt</a> | <a href="#">Pfam</a> | <a href="#">InterPro</a> |
| MSWHS_3065               | <a href="#">AKB19928</a> | sensory transduction histidine kinase [Met... | <a href="#">CDD</a> | <a href="#">UniProt</a> | <a href="#">Pfam</a> | <a href="#">InterPro</a> |
| MSWHS_3079               | <a href="#">AKB19942</a> | sensory transduction histidine kinase [Met... | <a href="#">CDD</a> | <a href="#">UniProt</a> | <a href="#">Pfam</a> | <a href="#">InterPro</a> |
| MSWHS_3098               | <a href="#">AKB19961</a> | sensory transduction histidine kinase [Met... | <a href="#">CDD</a> | <a href="#">UniProt</a> | <a href="#">Pfam</a> | <a href="#">InterPro</a> |
| MSWHS_3189               | <a href="#">AKB20052</a> | sensory transduction histidine kinase [Met... | <a href="#">CDD</a> | <a href="#">UniProt</a> | <a href="#">Pfam</a> | <a href="#">InterPro</a> |
| MSWHS_3196               | <a href="#">AKB20059</a> | Sensory transduction histidine kinase [Met... | <a href="#">CDD</a> | <a href="#">UniProt</a> | <a href="#">Pfam</a> | <a href="#">InterPro</a> |
| MSWHS_3397               | <a href="#">AKB20260</a> | Signal transduction histidine kinase CheA ... | <a href="#">CDD</a> | <a href="#">UniProt</a> | <a href="#">Pfam</a> | <a href="#">InterPro</a> |
| <b>Hybrid HisK</b>       |                          |                                               |                     |                         |                      |                          |
| MSWHS_1269               | <a href="#">AKB18132</a> | hypothetical protein MSWHS_1269 [Methanosa... | <a href="#">CDD</a> | <a href="#">UniProt</a> | <a href="#">Pfam</a> | <a href="#">InterPro</a> |
| MSWHS_1628               | <a href="#">AKB18491</a> | sensory transduction histidine kinase [Met... | <a href="#">CDD</a> | <a href="#">UniProt</a> | <a href="#">Pfam</a> | <a href="#">InterPro</a> |
| <b>HisKA, no HATPase</b> |                          |                                               |                     |                         |                      |                          |
| MSWHS_2744               | <a href="#">AKB19607</a> | Two component system histidine kinase [Met... | <a href="#">CDD</a> | <a href="#">UniProt</a> | <a href="#">Pfam</a> | <a href="#">InterPro</a> |
| <b>REC only</b>          |                          |                                               |                     |                         |                      |                          |
| MSWHS_0484               | <a href="#">AKB17347</a> | Two-component response regulator [Methanos... | <a href="#">CDD</a> | <a href="#">UniProt</a> | <a href="#">Pfam</a> | <a href="#">InterPro</a> |
| MSWHS_1268               | <a href="#">AKB18131</a> | GGDEF/response regulator receiver domain ...  | <a href="#">CDD</a> | <a href="#">UniProt</a> | <a href="#">Pfam</a> | <a href="#">InterPro</a> |
| MSWHS_1626               | <a href="#">AKB18489</a> | Response regulator receiver [Methanosarcin... | <a href="#">CDD</a> | <a href="#">UniProt</a> | <a href="#">Pfam</a> | <a href="#">InterPro</a> |
| MSWHS_1627               | <a href="#">AKB18490</a> | response regulator receiver [Methanosarcin... | <a href="#">CDD</a> | <a href="#">UniProt</a> | <a href="#">Pfam</a> | <a href="#">InterPro</a> |
| MSWHS_1686               | <a href="#">AKB18549</a> | response regulator receiver [Methanosarcin... | <a href="#">CDD</a> | <a href="#">UniProt</a> | <a href="#">Pfam</a> | <a href="#">InterPro</a> |
| MSWHS_1687               | <a href="#">AKB18550</a> | response regulator receiver [Methanosarcin... | <a href="#">CDD</a> | <a href="#">UniProt</a> | <a href="#">Pfam</a> | <a href="#">InterPro</a> |
| MSWHS_1737               | <a href="#">AKB18600</a> | Two-component response regulator [Methanos... | <a href="#">CDD</a> | <a href="#">UniProt</a> | <a href="#">Pfam</a> | <a href="#">InterPro</a> |

|                   |                          |                                               |     |                         |                      |                                       |
|-------------------|--------------------------|-----------------------------------------------|-----|-------------------------|----------------------|---------------------------------------|
| *MSWHS_1831       | <a href="#">AKB18694</a> | sensory transduction histidine kinase [Met... | CDD | <a href="#">UniProt</a> | <a href="#">Pfam</a> | <a href="#">InterPro</a>              |
| MSWHS_1832        | <a href="#">AKB18695</a> | Response regulator receiver [Methanosarcin... | CDD | <a href="#">UniProt</a> | <a href="#">Pfam</a> | <a href="#">InterPro</a>              |
| MSWHS_3190        | <a href="#">AKB20053</a> | response regulator receiver [Methanosarcin... | CDD | <a href="#">UniProt</a> | <a href="#">Pfam</a> | <a href="#">InterPro</a>              |
| MSWHS_3394        | <a href="#">AKB20257</a> | Two-component response regulator [Methanos... | CDD | <a href="#">UniProt</a> | <a href="#">Pfam</a> | <a href="#">InterPro</a>              |
| MSWHS_3395        | <a href="#">AKB20258</a> | Chemotaxis regulator - transmits chemorece... | CDD | <a href="#">UniProt</a> | <a href="#">Pfam</a> | <a href="#">InterPro</a>              |
| *MSWHS_0483       | <a href="#">AKB17346</a> | sensory transduction histidine kinase [Met... | CDD | <a href="#">UniProt</a> | <a href="#">Pfam</a> | <a href="#">InterPro</a>              |
| *MSWHS_1734       | <a href="#">AKB18597</a> | sensory transduction histidine kinase [Met... | CDD | <a href="#">UniProt</a> | <a href="#">Pfam</a> | <a href="#">InterPro</a>              |
| <b>REC-HisK</b>   |                          |                                               |     |                         |                      |                                       |
| MSWHS_1462        | <a href="#">AKB18325</a> | hypothetical protein MSWHS_1462 [Methanosa... | CDD | <a href="#">UniProt</a> | <a href="#">Pfam</a> | <a href="#">InterPro</a>              |
| <b>REC-CheB</b>   |                          |                                               |     |                         |                      |                                       |
| MSWHS_3396        | <a href="#">AKB20259</a> | Chemotaxis response regulator protein-glut... | CDD | <a href="#">UniProt</a> | <a href="#">Pfam</a> | <a href="#">InterPro</a>              |
| <b>wHTH-REC</b>   |                          |                                               |     |                         |                      |                                       |
| MSWHS_2780        | <a href="#">AKB19643</a> | Phosphate regulon transcriptional regulato... | CDD | <a href="#">UniProt</a> | <a href="#">Pfam</a> | <a href="#">InterPro</a> (wHTH-REC)   |
| <b>REC-MetOD1</b> |                          |                                               |     |                         |                      |                                       |
| MSWHS_1321        | <a href="#">AKB18184</a> | Response regulator receiver [Methanosarcin... | CDD | <a href="#">UniProt</a> | <a href="#">Pfam</a> | <a href="#">InterPro</a> (REC-MetOD1) |
| <b>Other RRs</b>  |                          |                                               |     |                         |                      |                                       |
| MSWHS_1735        | <a href="#">AKB18598</a> | sensory transduction histidine kinase [Met... | CDD | <a href="#">UniProt</a> | <a href="#">Pfam</a> | <a href="#">InterPro</a> (REC-xREC)   |
| *MSWHS_3191       | <a href="#">AKB20054</a> | hypothetical protein MSWHS_3191 [Methanosa... | CDD | <a href="#">UniProt</a> | <a href="#">Pfam</a> | <a href="#">InterPro</a>              |

### Methanosarcina thermophila CHTI-55

#### **HisK, no REC**

|             |                          |                                               |     |                         |                      |                          |
|-------------|--------------------------|-----------------------------------------------|-----|-------------------------|----------------------|--------------------------|
| MSTHC_0124  | <a href="#">AKB14442</a> | sensory transduction histidine kinase [Met... | CDD | <a href="#">UniProt</a> | <a href="#">Pfam</a> | <a href="#">InterPro</a> |
| MSTHC_0141  | <a href="#">AKB14459</a> | sensory transduction histidine kinase [Met... | CDD | <a href="#">UniProt</a> | <a href="#">Pfam</a> | <a href="#">InterPro</a> |
| MSTHC_0235  | <a href="#">AKB14553</a> | hypothetical protein MSTHC_0235 [Methanosa... | CDD | <a href="#">UniProt</a> | <a href="#">Pfam</a> | <a href="#">InterPro</a> |
| MSTHC_0272  | <a href="#">AKB14590</a> | sensory transduction histidine kinase [Met... | CDD | <a href="#">UniProt</a> | <a href="#">Pfam</a> | <a href="#">InterPro</a> |
| MSTHC_0274  | <a href="#">AKB14592</a> | sensory transduction histidine kinase [Met... | CDD | <a href="#">UniProt</a> | <a href="#">Pfam</a> | <a href="#">InterPro</a> |
| *MSTHC_0276 | <a href="#">AKB14594</a> | sensory transduction histidine kinase [Met... | CDD | <a href="#">UniProt</a> | <a href="#">Pfam</a> | <a href="#">InterPro</a> |
| MSTHC_0277  | <a href="#">AKB14595</a> | sensory transduction histidine kinase [Met... | CDD | <a href="#">UniProt</a> | <a href="#">Pfam</a> | <a href="#">InterPro</a> |
| MSTHC_0360  | <a href="#">AKB14678</a> | Sensory transduction histidine kinase [Met... | CDD | <a href="#">UniProt</a> | <a href="#">Pfam</a> | <a href="#">InterPro</a> |
| MSTHC_0502  | <a href="#">AKB14820</a> | sensory transduction histidine kinase [Met... | CDD | <a href="#">UniProt</a> | <a href="#">Pfam</a> | <a href="#">InterPro</a> |
| MSTHC_1085  | <a href="#">AKB15403</a> | sensory transduction histidine kinase [Met... | CDD | <a href="#">UniProt</a> | <a href="#">Pfam</a> | <a href="#">InterPro</a> |
| MSTHC_1088  | <a href="#">AKB15406</a> | sensory transduction histidine kinase [Met... | CDD | <a href="#">UniProt</a> | <a href="#">Pfam</a> | <a href="#">InterPro</a> |
| MSTHC_1096  | <a href="#">AKB15414</a> | sensory transduction histidine kinase [Met... | CDD | <a href="#">UniProt</a> | <a href="#">Pfam</a> | <a href="#">InterPro</a> |
| MSTHC_1155  | <a href="#">AKB15473</a> | Sensory transduction histidine kinase [Met... | CDD | <a href="#">UniProt</a> | <a href="#">Pfam</a> | <a href="#">InterPro</a> |
| MSTHC_1198  | <a href="#">AKB15516</a> | sensory transduction histidine kinase [Met... | CDD | <a href="#">UniProt</a> | <a href="#">Pfam</a> | <a href="#">InterPro</a> |
| *MSTHC_1199 | <a href="#">AKB15517</a> | sensory transduction histidine kinase [Met... | CDD | <a href="#">UniProt</a> | <a href="#">Pfam</a> | <a href="#">InterPro</a> |
| MSTHC_1457  | <a href="#">AKB15775</a> | Signal transduction histidine kinase CheA ... | CDD | <a href="#">UniProt</a> | <a href="#">Pfam</a> | <a href="#">InterPro</a> |
| MSTHC_1739  | <a href="#">AKB16057</a> | Sensory transduction histidine kinase [Met... | CDD | <a href="#">UniProt</a> | <a href="#">Pfam</a> | <a href="#">InterPro</a> |
| MSTHC_1916  | <a href="#">AKB16234</a> | sensory transduction histidine kinase [Met... | CDD | <a href="#">UniProt</a> | <a href="#">Pfam</a> | <a href="#">InterPro</a> |
| MSTHC_1918  | <a href="#">AKB16236</a> | sensory transduction histidine kinase [Met... | CDD | <a href="#">UniProt</a> | <a href="#">Pfam</a> | <a href="#">InterPro</a> |
| MSTHC_2084  | <a href="#">AKB16402</a> | Signal-transducing histidine kinase [Metha... | CDD | <a href="#">UniProt</a> | <a href="#">Pfam</a> | <a href="#">InterPro</a> |
| MSTHC_2312  | <a href="#">AKB16630</a> | sensory transduction histidine kinase [Met... | CDD | <a href="#">UniProt</a> | <a href="#">Pfam</a> | <a href="#">InterPro</a> |
| MSTHC_2537  | <a href="#">AKB16855</a> | sensory transduction histidine kinase [Met... | CDD | <a href="#">UniProt</a> | <a href="#">Pfam</a> | <a href="#">InterPro</a> |

#### **Hybrid HisK**

|            |                          |                                               |     |                         |                      |                          |
|------------|--------------------------|-----------------------------------------------|-----|-------------------------|----------------------|--------------------------|
| MSTHC_1534 | <a href="#">AKB15852</a> | Sensory transduction histidine kinase [Met... | CDD | <a href="#">UniProt</a> | <a href="#">Pfam</a> | <a href="#">InterPro</a> |
|------------|--------------------------|-----------------------------------------------|-----|-------------------------|----------------------|--------------------------|

#### **REC only**

|            |                          |                                              |     |                         |                      |                          |
|------------|--------------------------|----------------------------------------------|-----|-------------------------|----------------------|--------------------------|
| MSTHC_0236 | <a href="#">AKB14554</a> | response regulator receiver [Methanosarci... | CDD | <a href="#">UniProt</a> | <a href="#">Pfam</a> | <a href="#">InterPro</a> |
| MSTHC_0237 | <a href="#">AKB14555</a> | response regulator receiver [Methanosarci... | CDD | <a href="#">UniProt</a> | <a href="#">Pfam</a> | <a href="#">InterPro</a> |
| MSTHC_0341 | <a href="#">AKB14659</a> | Response regulator receiver [Methanosarci... | CDD | <a href="#">UniProt</a> | <a href="#">Pfam</a> | <a href="#">InterPro</a> |
| MSTHC_0396 | <a href="#">AKB14714</a> | Chemotaxis regulator - transmits chemorec... | CDD | <a href="#">UniProt</a> | <a href="#">Pfam</a> | <a href="#">InterPro</a> |
| MSTHC_0501 | <a href="#">AKB14819</a> | response regulator receiver [Methanosarci... | CDD | <a href="#">UniProt</a> | <a href="#">Pfam</a> | <a href="#">InterPro</a> |
| MSTHT_0940 | <a href="#">AKB12698</a> | response regulator receiver [Methanosarci... | CDD | <a href="#">UniProt</a> | <a href="#">Pfam</a> | <a href="#">InterPro</a> |
| MSTHC_1454 | <a href="#">AKB15772</a> | Two-component response regulator [Methano... | CDD | <a href="#">UniProt</a> | <a href="#">Pfam</a> | <a href="#">InterPro</a> |
| MSTHC_1455 | <a href="#">AKB15773</a> | Chemotaxis regulator - transmits chemorec... | CDD | <a href="#">UniProt</a> | <a href="#">Pfam</a> | <a href="#">InterPro</a> |
| MSTHC_1533 | <a href="#">AKB15851</a> | Two-component response regulator [Methano... | CDD | <a href="#">UniProt</a> | <a href="#">Pfam</a> | <a href="#">InterPro</a> |
| MSTHC_2311 | <a href="#">AKB16629</a> | Two-component system response regulator [... | CDD | <a href="#">UniProt</a> | <a href="#">Pfam</a> | <a href="#">InterPro</a> |
| MSTHC_2366 | <a href="#">AKB16684</a> | response regulator receiver [Methanosarci... | CDD | <a href="#">UniProt</a> | <a href="#">Pfam</a> | <a href="#">InterPro</a> |

#### **REC-HisK**

|            |                          |                                              |     |                         |                      |                          |
|------------|--------------------------|----------------------------------------------|-----|-------------------------|----------------------|--------------------------|
| MSTHC_2310 | <a href="#">AKB16628</a> | sensory transduction histidine kinase [Me... | CDD | <a href="#">UniProt</a> | <a href="#">Pfam</a> | <a href="#">InterPro</a> |
|------------|--------------------------|----------------------------------------------|-----|-------------------------|----------------------|--------------------------|

#### **REC-CheB**

|            |                          |                                              |     |                         |                      |                          |
|------------|--------------------------|----------------------------------------------|-----|-------------------------|----------------------|--------------------------|
| MSTHC_1456 | <a href="#">AKB15774</a> | Chemotaxis response regulator protein-glu... | CDD | <a href="#">UniProt</a> | <a href="#">Pfam</a> | <a href="#">InterPro</a> |
|------------|--------------------------|----------------------------------------------|-----|-------------------------|----------------------|--------------------------|

#### **wHTH-REC**

|            |                          |                                              |     |                         |                      |                          |
|------------|--------------------------|----------------------------------------------|-----|-------------------------|----------------------|--------------------------|
| MSTHT_0853 | <a href="#">AKB12611</a> | response regulator receiver [Methanosarci... | CDD | <a href="#">UniProt</a> | <a href="#">Pfam</a> | <a href="#">InterPro</a> |
|------------|--------------------------|----------------------------------------------|-----|-------------------------|----------------------|--------------------------|

|            |                          |                                              |     |                         |                      |                          |
|------------|--------------------------|----------------------------------------------|-----|-------------------------|----------------------|--------------------------|
| MSTHC_2418 | <a href="#">AKB16736</a> | response regulator receiver [Methanosarci... | CDD | <a href="#">UniProt</a> | <a href="#">Pfam</a> | <a href="#">InterPro</a> |
|------------|--------------------------|----------------------------------------------|-----|-------------------------|----------------------|--------------------------|

#### **REC-MetOD1**

|            |                          |                                              |     |                         |                      |                                       |
|------------|--------------------------|----------------------------------------------|-----|-------------------------|----------------------|---------------------------------------|
| MSTHC_2530 | <a href="#">AKB16848</a> | Response regulator receiver [Methanosarci... | CDD | <a href="#">UniProt</a> | <a href="#">Pfam</a> | <a href="#">InterPro</a> (REC-MetOD1) |
|------------|--------------------------|----------------------------------------------|-----|-------------------------|----------------------|---------------------------------------|

### Methanosarcina vacuolata Z-761

#### **HisK, no REC**

|            |                          |                                               |     |                         |                      |                          |
|------------|--------------------------|-----------------------------------------------|-----|-------------------------|----------------------|--------------------------|
| MSVAZ_0356 | <a href="#">AKB42625</a> | sensory transduction histidine kinase [Met... | CDD | <a href="#">UniProt</a> | <a href="#">Pfam</a> | <a href="#">InterPro</a> |
| MSVAZ_0372 | <a href="#">AKB42641</a> | Signal-transducing histidine kinase [Metha... | CDD | <a href="#">UniProt</a> | <a href="#">Pfam</a> | <a href="#">InterPro</a> |
| MSVAZ_0588 | <a href="#">AKB42857</a> | Sensory transduction histidine kinase [Met... | CDD | <a href="#">UniProt</a> | <a href="#">Pfam</a> | <a href="#">InterPro</a> |
| MSVAZ_0705 | <a href="#">AKB42974</a> | sensory transduction histidine kinase [Met... | CDD | <a href="#">UniProt</a> | <a href="#">Pfam</a> | <a href="#">InterPro</a> |
| MSVAZ_1090 | <a href="#">AKB43359</a> | Sensory transduction histidine kinase [Met... | CDD | <a href="#">UniProt</a> | <a href="#">Pfam</a> | <a href="#">InterPro</a> |
| MSVAZ_1169 | <a href="#">AKB43438</a> | sensory transduction histidine kinase [Met... | CDD | <a href="#">UniProt</a> | <a href="#">Pfam</a> | <a href="#">InterPro</a> |
| MSVAZ_1297 | <a href="#">AKB43566</a> | sensory transduction histidine kinase [Met... | CDD | <a href="#">UniProt</a> | <a href="#">Pfam</a> | <a href="#">InterPro</a> |
| MSVAZ_1321 | <a href="#">AKB43590</a> | Sensory transduction histidine kinase [Met... | CDD | <a href="#">UniProt</a> | <a href="#">Pfam</a> | <a href="#">InterPro</a> |

|                    |                          |                                               |                     |                         |                      |                          |              |
|--------------------|--------------------------|-----------------------------------------------|---------------------|-------------------------|----------------------|--------------------------|--------------|
| MSVAZ_1478         | <a href="#">AKB43747</a> | sensory transduction histidine kinase [Met... | <a href="#">CDD</a> | <a href="#">UniProt</a> | <a href="#">Pfam</a> | <a href="#">InterPro</a> |              |
| MSVAZ_1553         | <a href="#">AKB43822</a> | sensory transduction histidine kinase [Met... | <a href="#">CDD</a> | <a href="#">UniProt</a> | <a href="#">Pfam</a> | <a href="#">InterPro</a> |              |
| MSVAZ_1591         | <a href="#">AKB43860</a> | sensory transduction histidine kinase [Met... | <a href="#">CDD</a> | <a href="#">UniProt</a> | <a href="#">Pfam</a> | <a href="#">InterPro</a> |              |
| MSVAZ_1954         | <a href="#">AKB44223</a> | sensory transduction histidine kinase [Met... | <a href="#">CDD</a> | <a href="#">UniProt</a> | <a href="#">Pfam</a> | <a href="#">InterPro</a> |              |
| MSVAZ_2000         | <a href="#">AKB44269</a> | sensory transduction histidine kinase [Met... | <a href="#">CDD</a> | <a href="#">UniProt</a> | <a href="#">Pfam</a> | <a href="#">InterPro</a> |              |
| MSVAZ_2146         | <a href="#">AKB44415</a> | sensory transduction histidine kinase [Met... | <a href="#">CDD</a> | <a href="#">UniProt</a> | <a href="#">Pfam</a> | <a href="#">InterPro</a> |              |
| MSVAZ_2540         | <a href="#">AKB44809</a> | sensory transduction histidine kinase [Met... | <a href="#">CDD</a> | <a href="#">UniProt</a> | <a href="#">Pfam</a> | <a href="#">InterPro</a> |              |
| MSVAZ_2670         | <a href="#">AKB44939</a> | Sensory transduction histidine kinase [Met... | <a href="#">CDD</a> | <a href="#">UniProt</a> | <a href="#">Pfam</a> | <a href="#">InterPro</a> |              |
| MSVAZ_2694         | <a href="#">AKB44963</a> | sensory transduction histidine kinase [Met... | <a href="#">CDD</a> | <a href="#">UniProt</a> | <a href="#">Pfam</a> | <a href="#">InterPro</a> |              |
| MSVAZ_2797         | <a href="#">AKB45066</a> | sensory transduction histidine kinase [Met... | <a href="#">CDD</a> | <a href="#">UniProt</a> | <a href="#">Pfam</a> | <a href="#">InterPro</a> |              |
| MSVAZ_3145         | <a href="#">AKB45414</a> | sensory transduction histidine kinase [Met... | <a href="#">CDD</a> | <a href="#">UniProt</a> | <a href="#">Pfam</a> | <a href="#">InterPro</a> |              |
| MSVAZ_3244         | <a href="#">AKB45513</a> | Sensory transduction histidine kinase [Met... | <a href="#">CDD</a> | <a href="#">UniProt</a> | <a href="#">Pfam</a> | <a href="#">InterPro</a> |              |
| MSVAZ_3503         | <a href="#">AKB45772</a> | Signal transduction histidine kinase CheA ... | <a href="#">CDD</a> | <a href="#">UniProt</a> | <a href="#">Pfam</a> | <a href="#">InterPro</a> |              |
| <b>Hybrid HisK</b> |                          |                                               |                     |                         |                      |                          |              |
| MSVAZ_0219         | <a href="#">AKB42488</a> | Sensory transduction histidine kinase [Met... | <a href="#">CDD</a> | <a href="#">UniProt</a> | <a href="#">Pfam</a> | <a href="#">InterPro</a> |              |
| <b>REC only</b>    |                          |                                               |                     |                         |                      |                          |              |
| MSVAZ_0220         | <a href="#">AKB42489</a> | Two-component response regulator [Methano...  | <a href="#">CDD</a> | <a href="#">UniProt</a> | <a href="#">Pfam</a> | <a href="#">InterPro</a> |              |
| MSVAZ_1087         | <a href="#">AKB43356</a> | response regulator receiver [Methanosarci...  | <a href="#">CDD</a> | <a href="#">UniProt</a> | <a href="#">Pfam</a> | <a href="#">InterPro</a> |              |
| MSVAZ_1089         | <a href="#">AKB43358</a> | response regulator receiver [Methanosarci...  | <a href="#">CDD</a> | <a href="#">UniProt</a> | <a href="#">Pfam</a> | <a href="#">InterPro</a> |              |
| MSVAZ_1590         | <a href="#">AKB43859</a> | Two-component system response regulator [...  | <a href="#">CDD</a> | <a href="#">UniProt</a> | <a href="#">Pfam</a> | <a href="#">InterPro</a> |              |
| MSVAZ_1791         | <a href="#">AKB44060</a> | response regulator receiver [Methanosarci...  | <a href="#">CDD</a> | <a href="#">UniProt</a> | <a href="#">Pfam</a> | <a href="#">InterPro</a> |              |
| MSVAZ_1830         | <a href="#">AKB44099</a> | response regulator receiver [Methanosarci...  | <a href="#">CDD</a> | <a href="#">UniProt</a> | <a href="#">Pfam</a> | <a href="#">InterPro</a> |              |
| MSVAZ_2204         | <a href="#">AKB44473</a> | Chemotaxis regulator - transmits chemorec...  | <a href="#">CDD</a> | <a href="#">UniProt</a> | <a href="#">Pfam</a> | <a href="#">InterPro</a> |              |
| MSVAZ_2348         | <a href="#">AKB44617</a> | Response regulator receiver [Methanosarci...  | <a href="#">CDD</a> | <a href="#">UniProt</a> | <a href="#">Pfam</a> | <a href="#">InterPro</a> |              |
| MSVAZ_3499         | <a href="#">AKB45768</a> | Two-component response regulator [Methano...  | <a href="#">CDD</a> | <a href="#">UniProt</a> | <a href="#">Pfam</a> | <a href="#">InterPro</a> |              |
| MSVAZ_3500         | <a href="#">AKB45769</a> | Chemotaxis regulator - transmits chemorec...  | <a href="#">CDD</a> | <a href="#">UniProt</a> | <a href="#">Pfam</a> | <a href="#">InterPro</a> |              |
| MSVAZ_3502         | <a href="#">AKB45771</a> | Chemotaxis response regulator protein-glu...  | <a href="#">CDD</a> | <a href="#">UniProt</a> | <a href="#">Pfam</a> | <a href="#">InterPro</a> |              |
| <b>REC-HisK</b>    |                          |                                               |                     |                         |                      |                          |              |
| MSVAZ_1589         | <a href="#">AKB43858</a> | Sensory transduction histidine kinase [Me...  | <a href="#">CDD</a> | <a href="#">UniProt</a> | <a href="#">Pfam</a> | <a href="#">InterPro</a> |              |
| <b>wHTH-REC</b>    |                          |                                               |                     |                         |                      |                          |              |
| MSVAZ_1784         | <a href="#">AKB44053</a> | response regulator receiver [Methanosarci...  | <a href="#">CDD</a> | <a href="#">UniProt</a> | <a href="#">Pfam</a> | <a href="#">InterPro</a> | (wHTH-REC)   |
| <b>REC-MetOD1</b>  |                          |                                               |                     |                         |                      |                          |              |
| MSVAZ_2260         | <a href="#">AKB44529</a> | Response regulator receiver [Methanosarci...  | <a href="#">CDD</a> | <a href="#">UniProt</a> | <a href="#">Pfam</a> | <a href="#">InterPro</a> | (REC-MetOD1) |

### Methanosphaerula palustris E1-9c

#### **HisK, no REC**

|           |                          |                                                           |                     |                         |                      |                          |  |
|-----------|--------------------------|-----------------------------------------------------------|---------------------|-------------------------|----------------------|--------------------------|--|
| Mpal_0053 | <a href="#">ACL15447</a> | PAS/PAC sensor signal transduction histidi...             | <a href="#">CDD</a> | <a href="#">UniProt</a> | <a href="#">Pfam</a> | <a href="#">InterPro</a> |  |
| Mpal_0058 | <a href="#">ACL15452</a> | PAS/PAC sensor signal transduction histidi...             | <a href="#">CDD</a> | <a href="#">UniProt</a> | <a href="#">Pfam</a> | <a href="#">InterPro</a> |  |
| Mpal_0157 | <a href="#">ACL15550</a> | PAS/PAC sensor signal transduction histidi...             | <a href="#">CDD</a> | <a href="#">UniProt</a> | <a href="#">Pfam</a> | <a href="#">InterPro</a> |  |
| Mpal_0273 | <a href="#">ACL15656</a> | PAS/PAC sensor signal transduction histidi...             | <a href="#">CDD</a> | <a href="#">UniProt</a> | <a href="#">Pfam</a> | <a href="#">InterPro</a> |  |
| Mpal_0574 | <a href="#">ACL15946</a> | putative PAS/PAC sensor protein [Methanosp...             | <a href="#">CDD</a> | <a href="#">UniProt</a> | <a href="#">Pfam</a> | <a href="#">InterPro</a> |  |
| Mpal_0667 | <a href="#">ACL16035</a> | PAS/PAC sensor signal transduction histidi...             | <a href="#">CDD</a> | <a href="#">UniProt</a> | <a href="#">Pfam</a> | <a href="#">InterPro</a> |  |
| Mpal_0877 | <a href="#">ACL16235</a> | PAS/PAC sensor signal transduction histidi...             | <a href="#">CDD</a> | <a href="#">UniProt</a> | <a href="#">Pfam</a> | <a href="#">InterPro</a> |  |
| Mpal_0908 | <a href="#">ACL16262</a> | multi-sensor signal transduction histidine...             | <a href="#">CDD</a> | <a href="#">UniProt</a> | <a href="#">Pfam</a> | <a href="#">InterPro</a> |  |
| Mpal_0994 | <a href="#">ACL16345</a> | PAS/PAC sensor signal transduction histidi...             | <a href="#">CDD</a> | <a href="#">UniProt</a> | <a href="#">Pfam</a> | <a href="#">InterPro</a> |  |
| Mpal_1055 | <a href="#">ACL16402</a> | multi-sensor signal transduction histidine...             | <a href="#">CDD</a> | <a href="#">UniProt</a> | <a href="#">Pfam</a> | <a href="#">InterPro</a> |  |
| Mpal_1172 | <a href="#">ACL16514</a> | histidine kinase [Methanosphaerula palustr...             | <a href="#">CDD</a> | <a href="#">UniProt</a> | <a href="#">Pfam</a> | <a href="#">InterPro</a> |  |
| Mpal_1307 | <a href="#">ACL16641</a> | multi-sensor signal transduction histidine...             | <a href="#">CDD</a> | <a href="#">UniProt</a> | <a href="#">Pfam</a> | <a href="#">InterPro</a> |  |
| Mpal_1656 | <a href="#">ACL16968</a> | PAS/PAC sensor signal transduction histidi...             | <a href="#">CDD</a> | <a href="#">UniProt</a> | <a href="#">Pfam</a> | <a href="#">InterPro</a> |  |
| Mpal_1660 | <a href="#">ACL16972</a> | PAS/PAC sensor signal transduction histidi...             | <a href="#">CDD</a> | <a href="#">UniProt</a> | <a href="#">Pfam</a> | <a href="#">InterPro</a> |  |
| Mpal_1687 | <a href="#">ACL16996</a> | PAS/PAC sensor signal transduction histidi...             | <a href="#">CDD</a> | <a href="#">UniProt</a> | <a href="#">Pfam</a> | <a href="#">InterPro</a> |  |
| Mpal_1776 | <a href="#">ACL17083</a> | signal transduction histidine kinase [Meth...             | <a href="#">CDD</a> | <a href="#">UniProt</a> | <a href="#">Pfam</a> | <a href="#">InterPro</a> |  |
| Mpal_1856 | <a href="#">ACL17161</a> | CheA signal transduction histidine kinase ...             | <a href="#">CDD</a> | <a href="#">UniProt</a> | <a href="#">Pfam</a> | <a href="#">InterPro</a> |  |
| Mpal_2002 | <a href="#">ACL17305</a> | PAS/PAC sensor signal transduction histidi...             | <a href="#">CDD</a> | <a href="#">UniProt</a> | <a href="#">Pfam</a> | <a href="#">InterPro</a> |  |
| Mpal_2205 | <a href="#">ACL17501</a> | PAS/PAC sensor signal transduction histidi...             | <a href="#">CDD</a> | <a href="#">UniProt</a> | <a href="#">Pfam</a> | <a href="#">InterPro</a> |  |
| Mpal_2213 | <a href="#">ACL17508</a> | PAS/PAC sensor signal transduction histidi...             | <a href="#">CDD</a> | <a href="#">UniProt</a> | <a href="#">Pfam</a> | <a href="#">InterPro</a> |  |
| Mpal_2216 | <a href="#">ACL17510</a> | PAS/PAC sensor signal transduction histidi...             | <a href="#">CDD</a> | <a href="#">UniProt</a> | <a href="#">Pfam</a> | <a href="#">InterPro</a> |  |
| Mpal_2222 | <a href="#">ACL17515</a> | histidine kinase [Methanosphaerula palustr...             | <a href="#">CDD</a> | <a href="#">UniProt</a> | <a href="#">Pfam</a> | <a href="#">InterPro</a> |  |
| Mpal_2251 | <a href="#">ACL17544</a> | signal transduction histidine kinase, nitr...             | <a href="#">CDD</a> | <a href="#">UniProt</a> | <a href="#">Pfam</a> | <a href="#">InterPro</a> |  |
| Mpal_2258 | <a href="#">ACL17549</a> | PAS/PAC sensor signal transduction histidi...             | <a href="#">CDD</a> | <a href="#">UniProt</a> | <a href="#">Pfam</a> | <a href="#">InterPro</a> |  |
| Mpal_2259 | <a href="#">ACL17550</a> | PAS/PAC sensor signal transduction histidi...             | <a href="#">CDD</a> | <a href="#">UniProt</a> | <a href="#">Pfam</a> | <a href="#">InterPro</a> |  |
| Mpal_2433 | <a href="#">ACL17712</a> | Osmosensitive K <sup>+</sup> channel histidine kinase-... | <a href="#">CDD</a> | <a href="#">UniProt</a> | <a href="#">Pfam</a> | <a href="#">InterPro</a> |  |
| Mpal_2453 | <a href="#">ACL17730</a> | PAS/PAC sensor signal transduction histidi...             | <a href="#">CDD</a> | <a href="#">UniProt</a> | <a href="#">Pfam</a> | <a href="#">InterPro</a> |  |
| Mpal_2461 | <a href="#">ACL17738</a> | PAS/PAC sensor signal transduction histidi...             | <a href="#">CDD</a> | <a href="#">UniProt</a> | <a href="#">Pfam</a> | <a href="#">InterPro</a> |  |
| Mpal_2554 | <a href="#">ACL17826</a> | PAS/PAC sensor signal transduction histidi...             | <a href="#">CDD</a> | <a href="#">UniProt</a> | <a href="#">Pfam</a> | <a href="#">InterPro</a> |  |
| Mpal_2588 | <a href="#">ACL17858</a> | PAS/PAC sensor signal transduction histidi...             | <a href="#">CDD</a> | <a href="#">UniProt</a> | <a href="#">Pfam</a> | <a href="#">InterPro</a> |  |

#### **Hybrid HisK**

|           |                          |                                                |                     |                         |                      |                          |  |
|-----------|--------------------------|------------------------------------------------|---------------------|-------------------------|----------------------|--------------------------|--|
| Mpal_1329 | <a href="#">ACL16662</a> | CheA signal transduction histidine kinase [... | <a href="#">CDD</a> | <a href="#">UniProt</a> | <a href="#">Pfam</a> | <a href="#">InterPro</a> |  |
| Mpal_1518 | <a href="#">ACL16832</a> | PAS/PAC sensor hybrid histidine kinase [Met... | <a href="#">CDD</a> | <a href="#">UniProt</a> | <a href="#">Pfam</a> | <a href="#">InterPro</a> |  |
| Mpal_1818 | <a href="#">ACL17124</a> | PAS/PAC sensor hybrid histidine kinase [Met... | <a href="#">CDD</a> | <a href="#">UniProt</a> | <a href="#">Pfam</a> | <a href="#">InterPro</a> |  |

#### **HisKA, no HATPase**

|                 |                          |                                               |                     |                         |                      |                          |  |
|-----------------|--------------------------|-----------------------------------------------|---------------------|-------------------------|----------------------|--------------------------|--|
| Mpal_2249       | <a href="#">ACL17542</a> | multi-sensor signal transduction histidine... | <a href="#">CDD</a> | <a href="#">UniProt</a> | <a href="#">Pfam</a> | <a href="#">InterPro</a> |  |
| <b>REC only</b> |                          |                                               |                     |                         |                      |                          |  |
| Mpal_1519       | <a href="#">ACL16833</a> | response regulator receiver protein [Metha... | <a href="#">CDD</a> | <a href="#">UniProt</a> | <a href="#">Pfam</a> | <a href="#">InterPro</a> |  |
| Mpal_1771       | <a href="#">ACL17078</a> | response regulator receiver protein [Metha... | <a href="#">CDD</a> | <a href="#">UniProt</a> | <a href="#">Pfam</a> | <a href="#">InterPro</a> |  |
| Mpal_1858       | <a href="#">ACL17163</a> | response regulator receiver protein [Metha... | <a href="#">CDD</a> | <a href="#">UniProt</a> | <a href="#">Pfam</a> | <a href="#">InterPro</a> |  |
| Mpal_2157       | <a href="#">ACL17455</a> | response regulator receiver protein [Metha... | <a href="#">CDD</a> | <a href="#">UniProt</a> | <a href="#">Pfam</a> | <a href="#">InterPro</a> |  |
| Mpal_2212       | <a href="#">ACL17507</a> | response regulator receiver protein [Metha... | <a href="#">CDD</a> | <a href="#">UniProt</a> | <a href="#">Pfam</a> | <a href="#">InterPro</a> |  |

|                    |                          |                                               |     |                         |                      |                          |                              |
|--------------------|--------------------------|-----------------------------------------------|-----|-------------------------|----------------------|--------------------------|------------------------------|
| Mpal_2247          | <a href="#">ACL17540</a> | response regulator receiver protein [Metha... | CDD | <a href="#">UniProt</a> | <a href="#">Pfam</a> | <a href="#">InterPro</a> |                              |
| Mpal_2268          | <a href="#">ACL17557</a> | response regulator receiver protein [Metha... | CDD | <a href="#">UniProt</a> | <a href="#">Pfam</a> | <a href="#">InterPro</a> |                              |
| <b>REC-HisK</b>    |                          |                                               |     |                         |                      |                          |                              |
| Mpal_0015          | <a href="#">ACL15411</a> | response regulator receiver protein [Metha... | CDD | <a href="#">UniProt</a> | <a href="#">Pfam</a> | <a href="#">InterPro</a> |                              |
| Mpal_0047          | <a href="#">ACL15442</a> | signal transduction histidine kinase [Meth... | CDD | <a href="#">UniProt</a> | <a href="#">Pfam</a> | <a href="#">InterPro</a> |                              |
| Mpal_0079          | <a href="#">ACL15473</a> | signal transduction histidine kinase [Meth... | CDD | <a href="#">UniProt</a> | <a href="#">Pfam</a> | <a href="#">InterPro</a> |                              |
| Mpal_0170          | <a href="#">ACL15563</a> | multi-sensor signal transduction histidine... | CDD | <a href="#">UniProt</a> | <a href="#">Pfam</a> | <a href="#">InterPro</a> |                              |
| Mpal_0266          | <a href="#">ACL15650</a> | multi-sensor signal transduction histidine... | CDD | <a href="#">UniProt</a> | <a href="#">Pfam</a> | <a href="#">InterPro</a> |                              |
| Mpal_0715          | <a href="#">ACL16081</a> | multi-sensor signal transduction histidine... | CDD | <a href="#">UniProt</a> | <a href="#">Pfam</a> | <a href="#">InterPro</a> |                              |
| Mpal_0932          | <a href="#">ACL16284</a> | multi-sensor signal transduction histidine... | CDD | <a href="#">UniProt</a> | <a href="#">Pfam</a> | <a href="#">InterPro</a> |                              |
| Mpal_1070          | <a href="#">ACL16416</a> | multi-sensor signal transduction histidine... | CDD | <a href="#">UniProt</a> | <a href="#">Pfam</a> | <a href="#">InterPro</a> |                              |
| Mpal_1167          | <a href="#">ACL16509</a> | multi-sensor signal transduction histidine... | CDD | <a href="#">UniProt</a> | <a href="#">Pfam</a> | <a href="#">InterPro</a> |                              |
| Mpal_1293          | <a href="#">ACL16627</a> | putative PAS/PAC sensor protein [Methanosp... | CDD | <a href="#">UniProt</a> | <a href="#">Pfam</a> | <a href="#">InterPro</a> |                              |
| Mpal_1331          | <a href="#">ACL16664</a> | multi-sensor signal transduction histidine... | CDD | <a href="#">UniProt</a> | <a href="#">Pfam</a> | <a href="#">InterPro</a> |                              |
| Mpal_1514          | <a href="#">ACL16828</a> | multi-sensor signal transduction histidine... | CDD | <a href="#">UniProt</a> | <a href="#">Pfam</a> | <a href="#">InterPro</a> |                              |
| Mpal_1520          | <a href="#">ACL16834</a> | multi-sensor signal transduction histidine... | CDD | <a href="#">UniProt</a> | <a href="#">Pfam</a> | <a href="#">InterPro</a> |                              |
| Mpal_1525          | <a href="#">ACL16839</a> | multi-sensor signal transduction histidine... | CDD | <a href="#">UniProt</a> | <a href="#">Pfam</a> | <a href="#">InterPro</a> |                              |
| Mpal_1640          | <a href="#">ACL16952</a> | multi-sensor signal transduction histidine... | CDD | <a href="#">UniProt</a> | <a href="#">Pfam</a> | <a href="#">InterPro</a> |                              |
| Mpal_1755          | <a href="#">ACL17062</a> | multi-sensor signal transduction histidine... | CDD | <a href="#">UniProt</a> | <a href="#">Pfam</a> | <a href="#">InterPro</a> |                              |
| Mpal_1773          | <a href="#">ACL17080</a> | response regulator receiver protein [Metha... | CDD | <a href="#">UniProt</a> | <a href="#">Pfam</a> | <a href="#">InterPro</a> |                              |
| Mpal_1919          | <a href="#">ACL17223</a> | multi-sensor signal transduction histidine... | CDD | <a href="#">UniProt</a> | <a href="#">Pfam</a> | <a href="#">InterPro</a> |                              |
| Mpal_2462          | <a href="#">ACL17739</a> | multi-sensor signal transduction histidine... | CDD | <a href="#">UniProt</a> | <a href="#">Pfam</a> | <a href="#">InterPro</a> |                              |
| Mpal_2477          | <a href="#">ACL17753</a> | multi-sensor signal transduction histidine... | CDD | <a href="#">UniProt</a> | <a href="#">Pfam</a> | <a href="#">InterPro</a> |                              |
| Mpal_2700          | <a href="#">ACL17964</a> | multi-sensor signal transduction histidine... | CDD | <a href="#">UniProt</a> | <a href="#">Pfam</a> | <a href="#">InterPro</a> |                              |
| Mpal_2706          | <a href="#">ACL17970</a> | hypothetical protein Mpal_2706 [Methanosp...  | CDD | <a href="#">UniProt</a> | <a href="#">Pfam</a> | <a href="#">InterPro</a> |                              |
| <b>REC-CheB</b>    |                          |                                               |     |                         |                      |                          |                              |
| Mpal_1330          | <a href="#">ACL16663</a> | response regulator receiver protein [Metha... | CDD | <a href="#">UniProt</a> | <a href="#">Pfam</a> | <a href="#">InterPro</a> |                              |
| Mpal_1857          | <a href="#">ACL17162</a> | response regulator receiver protein [Metha... | CDD | <a href="#">UniProt</a> | <a href="#">Pfam</a> | <a href="#">InterPro</a> |                              |
| <b>REC-PAS/GAF</b> |                          |                                               |     |                         |                      |                          |                              |
| Mpal_0048          | <a href="#">ACL15443</a> | putative PAS/PAC sensor protein [Methanosp... | CDD | <a href="#">UniProt</a> | <a href="#">Pfam</a> | <a href="#">InterPro</a> |                              |
| Mpal_0141          | <a href="#">ACL15534</a> | putative PAS/PAC sensor protein [Methanosp... | CDD | <a href="#">UniProt</a> | <a href="#">Pfam</a> | <a href="#">InterPro</a> |                              |
| Mpal_0573          | <a href="#">ACL15945</a> | response regulator receiver protein [Metha... | CDD | <a href="#">UniProt</a> | <a href="#">Pfam</a> | <a href="#">InterPro</a> |                              |
| Mpal_0622          | <a href="#">ACL15993</a> | putative PAS/PAC sensor protein [Methanosp... | CDD | <a href="#">UniProt</a> | <a href="#">Pfam</a> | <a href="#">InterPro</a> |                              |
| Mpal_1335          | <a href="#">ACL16668</a> | putative PAS/PAC sensor protein [Methanosp... | CDD | <a href="#">UniProt</a> | <a href="#">Pfam</a> | <a href="#">InterPro</a> |                              |
| Mpal_1709          | <a href="#">ACL17017</a> | putative PAS/PAC sensor protein [Methanosp... | CDD | <a href="#">UniProt</a> | <a href="#">Pfam</a> | <a href="#">InterPro</a> |                              |
| Mpal_2215          | <a href="#">ACL17509</a> | putative PAS/PAC sensor protein [Methanosp... | CDD | <a href="#">UniProt</a> | <a href="#">Pfam</a> | <a href="#">InterPro</a> |                              |
| Mpal_2266          | <a href="#">ACL17555</a> | putative PAS/PAC sensor protein [Methanosp... | CDD | <a href="#">UniProt</a> | <a href="#">Pfam</a> | <a href="#">InterPro</a> |                              |
| Mpal_2464          | <a href="#">ACL17740</a> | putative PAS/PAC sensor protein [Methanosp... | CDD | <a href="#">UniProt</a> | <a href="#">Pfam</a> | <a href="#">InterPro</a> |                              |
| Mpal_2756          | <a href="#">ACL18015</a> | putative PAS/PAC sensor protein [Methanosp... | CDD | <a href="#">UniProt</a> | <a href="#">Pfam</a> | <a href="#">InterPro</a> |                              |
| <b>Other RRs</b>   |                          |                                               |     |                         |                      |                          |                              |
| Mpal_1470          | <a href="#">ACL16792</a> | response regulator receiver protein [Metha... | CDD | <a href="#">UniProt</a> | <a href="#">Pfam</a> | <a href="#">InterPro</a> | (unique???)                  |
| Mpal_1772          | <a href="#">ACL17079</a> | methyl-accepting chemotaxis sensory transd... | CDD | <a href="#">UniProt</a> | <a href="#">Pfam</a> | <a href="#">InterPro</a> | (REC-PAS-PAS-HAMP-MCPsignal) |
| Mpal_2156          | <a href="#">ACL17454</a> | response regulator receiver protein [Metha... | CDD | <a href="#">UniProt</a> | <a href="#">Pfam</a> | <a href="#">InterPro</a> | (REC-MetOD2)                 |

### Methanospirillum hungatei JF-1

#### **HisK, no REC**

|           |                          |                                               |     |                         |                      |                          |  |
|-----------|--------------------------|-----------------------------------------------|-----|-------------------------|----------------------|--------------------------|--|
| Mhun_0005 | <a href="#">ABD39786</a> | PAS/PAC sensor signal transduction histidi... | CDD | <a href="#">UniProt</a> | <a href="#">Pfam</a> | <a href="#">InterPro</a> |  |
| Mhun_0110 | <a href="#">ABD39888</a> | CheA signal transduction histidine kinases... | CDD | <a href="#">UniProt</a> | <a href="#">Pfam</a> | <a href="#">InterPro</a> |  |
| Mhun_0170 | <a href="#">ABD39946</a> | ATP-binding region, ATPase-like protein [M... | CDD | <a href="#">UniProt</a> | <a href="#">Pfam</a> | <a href="#">InterPro</a> |  |
| Mhun_0325 | <a href="#">ABD40095</a> | histidine kinase [Methanospirillum hungate... | CDD | <a href="#">UniProt</a> | <a href="#">Pfam</a> | <a href="#">InterPro</a> |  |
| Mhun_0358 | <a href="#">ABD40128</a> | multi-sensor signal transduction histidine... | CDD | <a href="#">UniProt</a> | <a href="#">Pfam</a> | <a href="#">InterPro</a> |  |
| Mhun_0463 | <a href="#">ABD40225</a> | putative signal transduction histidine kin... | CDD | <a href="#">UniProt</a> | <a href="#">Pfam</a> | <a href="#">InterPro</a> |  |
| Mhun_0471 | <a href="#">ABD40233</a> | histidine kinase [Methanospirillum hungate... | CDD | <a href="#">UniProt</a> | <a href="#">Pfam</a> | <a href="#">InterPro</a> |  |
| Mhun_0640 | <a href="#">ABD40396</a> | multi-sensor signal transduction histidine... | CDD | <a href="#">UniProt</a> | <a href="#">Pfam</a> | <a href="#">InterPro</a> |  |
| Mhun_0700 | <a href="#">ABD40453</a> | multi-sensor signal transduction histidine... | CDD | <a href="#">UniProt</a> | <a href="#">Pfam</a> | <a href="#">InterPro</a> |  |
| Mhun_0885 | <a href="#">ABD40635</a> | PAS/PAC sensor signal transduction histidi... | CDD | <a href="#">UniProt</a> | <a href="#">Pfam</a> | <a href="#">InterPro</a> |  |
| Mhun_0925 | <a href="#">ABD40675</a> | histidine kinase [Methanospirillum hungate... | CDD | <a href="#">UniProt</a> | <a href="#">Pfam</a> | <a href="#">InterPro</a> |  |
| Mhun_1199 | <a href="#">ABD40946</a> | multi-sensor signal transduction histidine... | CDD | <a href="#">UniProt</a> | <a href="#">Pfam</a> | <a href="#">InterPro</a> |  |
| Mhun_1234 | <a href="#">ABD40980</a> | multi-sensor signal transduction histidine... | CDD | <a href="#">UniProt</a> | <a href="#">Pfam</a> | <a href="#">InterPro</a> |  |
| Mhun_1287 | <a href="#">ABD41030</a> | multi-sensor signal transduction histidine... | CDD | <a href="#">UniProt</a> | <a href="#">Pfam</a> | <a href="#">InterPro</a> |  |
| Mhun_1346 | <a href="#">ABD41086</a> | histidine kinase [Methanospirillum hungate... | CDD | <a href="#">UniProt</a> | <a href="#">Pfam</a> | <a href="#">InterPro</a> |  |
| Mhun_1350 | <a href="#">ABD41090</a> | multi-sensor signal transduction histidine... | CDD | <a href="#">UniProt</a> | <a href="#">Pfam</a> | <a href="#">InterPro</a> |  |
| Mhun_1352 | <a href="#">ABD41092</a> | multi-sensor signal transduction histidine... | CDD | <a href="#">UniProt</a> | <a href="#">Pfam</a> | <a href="#">InterPro</a> |  |
| Mhun_1413 | <a href="#">ABD41148</a> | putative PAS/PAC sensor protein [Methanosp... | CDD | <a href="#">UniProt</a> | <a href="#">Pfam</a> | <a href="#">InterPro</a> |  |
| Mhun_1414 | <a href="#">ABD41149</a> | signal transduction histidine kinase regul... | CDD | <a href="#">UniProt</a> | <a href="#">Pfam</a> | <a href="#">InterPro</a> |  |
| Mhun_1417 | <a href="#">ABD41152</a> | multi-sensor signal transduction histidine... | CDD | <a href="#">UniProt</a> | <a href="#">Pfam</a> | <a href="#">InterPro</a> |  |
| Mhun_1433 | <a href="#">ABD41168</a> | multi-sensor signal transduction histidine... | CDD | <a href="#">UniProt</a> | <a href="#">Pfam</a> | <a href="#">InterPro</a> |  |
| Mhun_1435 | <a href="#">ABD41170</a> | periplasmic sensor signal transduction his... | CDD | <a href="#">UniProt</a> | <a href="#">Pfam</a> | <a href="#">InterPro</a> |  |
| Mhun_1442 | <a href="#">ABD41177</a> | multi-sensor signal transduction histidine... | CDD | <a href="#">UniProt</a> | <a href="#">Pfam</a> | <a href="#">InterPro</a> |  |
| Mhun_1563 | <a href="#">ABD41294</a> | multi-sensor signal transduction histidine... | CDD | <a href="#">UniProt</a> | <a href="#">Pfam</a> | <a href="#">InterPro</a> |  |
| Mhun_1647 | <a href="#">ABD41378</a> | PAS/PAC sensor signal transduction histidi... | CDD | <a href="#">UniProt</a> | <a href="#">Pfam</a> | <a href="#">InterPro</a> |  |
| Mhun_1933 | <a href="#">ABD41644</a> | multi-sensor signal transduction histidine... | CDD | <a href="#">UniProt</a> | <a href="#">Pfam</a> | <a href="#">InterPro</a> |  |
| Mhun_1958 | <a href="#">ABD41668</a> | periplasmic ligand-binding sensor protein ... | CDD | <a href="#">UniProt</a> | <a href="#">Pfam</a> | <a href="#">InterPro</a> |  |
| Mhun_1963 | <a href="#">ABD41673</a> | periplasmic sensor signal transduction his... | CDD | <a href="#">UniProt</a> | <a href="#">Pfam</a> | <a href="#">InterPro</a> |  |
| Mhun_2024 | <a href="#">ABD41733</a> | PAS/PAC sensor signal transduction histidi... | CDD | <a href="#">UniProt</a> | <a href="#">Pfam</a> | <a href="#">InterPro</a> |  |
| Mhun_2038 | <a href="#">ABD41746</a> | signal transduction histidine kinase regul... | CDD | <a href="#">UniProt</a> | <a href="#">Pfam</a> | <a href="#">InterPro</a> |  |
| Mhun_2434 | <a href="#">ABD42135</a> | multi-sensor signal transduction histidine... | CDD | <a href="#">UniProt</a> | <a href="#">Pfam</a> | <a href="#">InterPro</a> |  |

|                          |                          |                                               |     |                         |                      |                          |
|--------------------------|--------------------------|-----------------------------------------------|-----|-------------------------|----------------------|--------------------------|
| Mhun_2640                | <a href="#">ABD42337</a> | histidine kinase [Methanospirillum hungate... | CDD | <a href="#">UniProt</a> | <a href="#">Pfam</a> | <a href="#">InterPro</a> |
| Mhun_2642                | <a href="#">ABD42339</a> | multi-sensor signal transduction histidine... | CDD | <a href="#">UniProt</a> | <a href="#">Pfam</a> | <a href="#">InterPro</a> |
| Mhun_2672                | <a href="#">ABD42368</a> | PAS/PAC sensor signal transduction histidi... | CDD | <a href="#">UniProt</a> | <a href="#">Pfam</a> | <a href="#">InterPro</a> |
| Mhun_2676                | <a href="#">ABD42372</a> | histidine kinase [Methanospirillum hungate... | CDD | <a href="#">UniProt</a> | <a href="#">Pfam</a> | <a href="#">InterPro</a> |
| Mhun_2683                | <a href="#">ABD42378</a> | PAS/PAC sensor signal transduction histidi... | CDD | <a href="#">UniProt</a> | <a href="#">Pfam</a> | <a href="#">InterPro</a> |
| Mhun_2687                | <a href="#">ABD42382</a> | signal transduction histidine kinase [Meth... | CDD | <a href="#">UniProt</a> | <a href="#">Pfam</a> | <a href="#">InterPro</a> |
| Mhun_2689                | <a href="#">ABD42384</a> | Cache sensor signal transduction histidine... | CDD | <a href="#">UniProt</a> | <a href="#">Pfam</a> | <a href="#">InterPro</a> |
| Mhun_2693                | <a href="#">ABD42388</a> | PAS/PAC sensor signal transduction histidi... | CDD | <a href="#">UniProt</a> | <a href="#">Pfam</a> | <a href="#">InterPro</a> |
| Mhun_2719                | <a href="#">ABD42414</a> | periplasmic sensor signal transduction his... | CDD | <a href="#">UniProt</a> | <a href="#">Pfam</a> | <a href="#">InterPro</a> |
| Mhun_2775                | <a href="#">ABD42470</a> | ATP-binding region, ATPase-like protein [M... | CDD | <a href="#">UniProt</a> | <a href="#">Pfam</a> | <a href="#">InterPro</a> |
| Mhun_2876                | <a href="#">ABD42568</a> | multi-sensor signal transduction histidine... | CDD | <a href="#">UniProt</a> | <a href="#">Pfam</a> | <a href="#">InterPro</a> |
| Mhun_2965                | <a href="#">ABD42653</a> | histidine kinase [Methanospirillum hungate... | CDD | <a href="#">UniProt</a> | <a href="#">Pfam</a> | <a href="#">InterPro</a> |
| Mhun_3167                | <a href="#">ABD42849</a> | multi-sensor signal transduction histidine... | CDD | <a href="#">UniProt</a> | <a href="#">Pfam</a> | <a href="#">InterPro</a> |
| <b>Hybrid HisK</b>       |                          |                                               |     |                         |                      |                          |
| Mhun_0494                | <a href="#">ABD40256</a> | CheA signal transduction histidine kinases... | CDD | <a href="#">UniProt</a> | <a href="#">Pfam</a> | <a href="#">InterPro</a> |
| Mhun_0989                | <a href="#">ABD40739</a> | CheA signal transduction histidine kinase ... | CDD | <a href="#">UniProt</a> | <a href="#">Pfam</a> | <a href="#">InterPro</a> |
| <b>HisKA, no HATPase</b> |                          |                                               |     |                         |                      |                          |
| Mhun_0006                | <a href="#">ABD39787</a> | putative PAS/PAC sensor protein [Methanosp... | CDD | <a href="#">UniProt</a> | <a href="#">Pfam</a> | <a href="#">InterPro</a> |
| <b>REC only</b>          |                          |                                               |     |                         |                      |                          |
| Mhun_0108                | <a href="#">ABD39886</a> | Response regulator receiver domain protein... | CDD | <a href="#">UniProt</a> | <a href="#">Pfam</a> | <a href="#">InterPro</a> |
| Mhun_0126                | <a href="#">ABD39903</a> | Response regulator receiver domain protein... | CDD | <a href="#">UniProt</a> | <a href="#">Pfam</a> | <a href="#">InterPro</a> |
| Mhun_0159                | <a href="#">ABD39935</a> | Response regulator receiver domain protein... | CDD | <a href="#">UniProt</a> | <a href="#">Pfam</a> | <a href="#">InterPro</a> |
| Mhun_0161                | <a href="#">ABD39937</a> | Response regulator receiver domain protein... | CDD | <a href="#">UniProt</a> | <a href="#">Pfam</a> | <a href="#">InterPro</a> |
| Mhun_0315                | <a href="#">ABD40085</a> | Response regulator receiver domain protein... | CDD | <a href="#">UniProt</a> | <a href="#">Pfam</a> | <a href="#">InterPro</a> |
| Mhun_0886                | <a href="#">ABD40636</a> | Response regulator receiver domain protein... | CDD | <a href="#">UniProt</a> | <a href="#">Pfam</a> | <a href="#">InterPro</a> |
| Mhun_0953                | <a href="#">ABD40703</a> | Response regulator receiver domain protein... | CDD | <a href="#">UniProt</a> | <a href="#">Pfam</a> | <a href="#">InterPro</a> |
| Mhun_1439                | <a href="#">ABD41174</a> | Response regulator receiver domain protein... | CDD | <a href="#">UniProt</a> | <a href="#">Pfam</a> | <a href="#">InterPro</a> |
| Mhun_1643                | <a href="#">ABD41374</a> | Response regulator receiver domain protein... | CDD | <a href="#">UniProt</a> | <a href="#">Pfam</a> | <a href="#">InterPro</a> |
| Mhun_1923                | <a href="#">ABD41634</a> | Response regulator receiver domain protein... | CDD | <a href="#">UniProt</a> | <a href="#">Pfam</a> | <a href="#">InterPro</a> |
| Mhun_1941                | <a href="#">ABD41652</a> | Response regulator receiver domain protein... | CDD | <a href="#">UniProt</a> | <a href="#">Pfam</a> | <a href="#">InterPro</a> |
| Mhun_1966                | <a href="#">ABD41676</a> | Response regulator receiver domain protein... | CDD | <a href="#">UniProt</a> | <a href="#">Pfam</a> | <a href="#">InterPro</a> |
| Mhun_2031                | <a href="#">ABD41739</a> | Response regulator receiver domain protein... | CDD | <a href="#">UniProt</a> | <a href="#">Pfam</a> | <a href="#">InterPro</a> |
| Mhun_2037                | <a href="#">ABD41745</a> | Response regulator receiver domain protein... | CDD | <a href="#">UniProt</a> | <a href="#">Pfam</a> | <a href="#">InterPro</a> |
| Mhun_2576                | <a href="#">ABD42273</a> | Response regulator receiver domain protein... | CDD | <a href="#">UniProt</a> | <a href="#">Pfam</a> | <a href="#">InterPro</a> |
| Mhun_2673                | <a href="#">ABD42369</a> | Response regulator receiver domain protein... | CDD | <a href="#">UniProt</a> | <a href="#">Pfam</a> | <a href="#">InterPro</a> |
| Mhun_2684                | <a href="#">ABD42379</a> | Response regulator receiver domain protein... | CDD | <a href="#">UniProt</a> | <a href="#">Pfam</a> | <a href="#">InterPro</a> |
| Mhun_2690                | <a href="#">ABD42385</a> | Response regulator receiver domain protein... | CDD | <a href="#">UniProt</a> | <a href="#">Pfam</a> | <a href="#">InterPro</a> |
| Mhun_2877                | <a href="#">ABD42569</a> | Response regulator receiver domain protein... | CDD | <a href="#">UniProt</a> | <a href="#">Pfam</a> | <a href="#">InterPro</a> |
| Mhun_2879                | <a href="#">ABD42571</a> | Response regulator receiver domain protein... | CDD | <a href="#">UniProt</a> | <a href="#">Pfam</a> | <a href="#">InterPro</a> |
| Mhun_3035                | <a href="#">ABD42722</a> | Response regulator receiver domain protein... | CDD | <a href="#">UniProt</a> | <a href="#">Pfam</a> | <a href="#">InterPro</a> |
| Mhun_3040                | <a href="#">ABD42727</a> | Response regulator receiver domain protein... | CDD | <a href="#">UniProt</a> | <a href="#">Pfam</a> | <a href="#">InterPro</a> |
| Mhun_3041                | <a href="#">ABD42728</a> | Response regulator receiver domain protein... | CDD | <a href="#">UniProt</a> | <a href="#">Pfam</a> | <a href="#">InterPro</a> |
| Mhun_3201                | <a href="#">ABD42883</a> | Response regulator receiver domain protein... | CDD | <a href="#">UniProt</a> | <a href="#">Pfam</a> | <a href="#">InterPro</a> |
| <b>REC-HisK</b>          |                          |                                               |     |                         |                      |                          |
| Mhun_0004                | <a href="#">ABD39785</a> | multi-sensor signal transduction histidine... | CDD | <a href="#">UniProt</a> | <a href="#">Pfam</a> | <a href="#">InterPro</a> |
| Mhun_0160                | <a href="#">ABD39936</a> | PAS/PAC sensor hybrid histidine kinase [Me... | CDD | <a href="#">UniProt</a> | <a href="#">Pfam</a> | <a href="#">InterPro</a> |
| Mhun_0454                | <a href="#">ABD40216</a> | signal transduction histidine kinase [Meth... | CDD | <a href="#">UniProt</a> | <a href="#">Pfam</a> | <a href="#">InterPro</a> |
| Mhun_0493                | <a href="#">ABD40255</a> | response regulator receiver sensor signal ... | CDD | <a href="#">UniProt</a> | <a href="#">Pfam</a> | <a href="#">InterPro</a> |
| Mhun_0545                | <a href="#">ABD40305</a> | multi-sensor signal transduction histidine... | CDD | <a href="#">UniProt</a> | <a href="#">Pfam</a> | <a href="#">InterPro</a> |
| Mhun_0549                | <a href="#">ABD40309</a> | multi-sensor signal transduction histidine... | CDD | <a href="#">UniProt</a> | <a href="#">Pfam</a> | <a href="#">InterPro</a> |
| Mhun_0986                | <a href="#">ABD40736</a> | response regulator receiver sensor signal ... | CDD | <a href="#">UniProt</a> | <a href="#">Pfam</a> | <a href="#">InterPro</a> |
| Mhun_0987                | <a href="#">ABD40737</a> | response regulator receiver sensor signal ... | CDD | <a href="#">UniProt</a> | <a href="#">Pfam</a> | <a href="#">InterPro</a> |
| Mhun_1048                | <a href="#">ABD40798</a> | multi-sensor signal transduction histidine... | CDD | <a href="#">UniProt</a> | <a href="#">Pfam</a> | <a href="#">InterPro</a> |
| Mhun_1208                | <a href="#">ABD40955</a> | multi-sensor signal transduction histidine... | CDD | <a href="#">UniProt</a> | <a href="#">Pfam</a> | <a href="#">InterPro</a> |
| Mhun_1309                | <a href="#">ABD41049</a> | multi-sensor signal transduction histidine... | CDD | <a href="#">UniProt</a> | <a href="#">Pfam</a> | <a href="#">InterPro</a> |
| Mhun_1349                | <a href="#">ABD41089</a> | multi-sensor signal transduction histidine... | CDD | <a href="#">UniProt</a> | <a href="#">Pfam</a> | <a href="#">InterPro</a> |
| Mhun_1353                | <a href="#">ABD41093</a> | multi-sensor signal transduction histidine... | CDD | <a href="#">UniProt</a> | <a href="#">Pfam</a> | <a href="#">InterPro</a> |
| Mhun_1354                | <a href="#">ABD41094</a> | multi-sensor signal transduction histidine... | CDD | <a href="#">UniProt</a> | <a href="#">Pfam</a> | <a href="#">InterPro</a> |
| Mhun_1415                | <a href="#">ABD41150</a> | multi-sensor signal transduction histidine... | CDD | <a href="#">UniProt</a> | <a href="#">Pfam</a> | <a href="#">InterPro</a> |
| Mhun_1419                | <a href="#">ABD41154</a> | multi-sensor signal transduction histidine... | CDD | <a href="#">UniProt</a> | <a href="#">Pfam</a> | <a href="#">InterPro</a> |
| Mhun_1420                | <a href="#">ABD41155</a> | multi-sensor signal transduction histidine... | CDD | <a href="#">UniProt</a> | <a href="#">Pfam</a> | <a href="#">InterPro</a> |
| Mhun_1481                | <a href="#">ABD41215</a> | multi-sensor signal transduction histidine... | CDD | <a href="#">UniProt</a> | <a href="#">Pfam</a> | <a href="#">InterPro</a> |
| Mhun_1649                | <a href="#">ABD41380</a> | response regulator receiver sensor signal ... | CDD | <a href="#">UniProt</a> | <a href="#">Pfam</a> | <a href="#">InterPro</a> |
| Mhun_1723                | <a href="#">ABD41446</a> | signal transduction histidine kinase [Meth... | CDD | <a href="#">UniProt</a> | <a href="#">Pfam</a> | <a href="#">InterPro</a> |
| Mhun_1739                | <a href="#">ABD41461</a> | multi-sensor signal transduction histidine... | CDD | <a href="#">UniProt</a> | <a href="#">Pfam</a> | <a href="#">InterPro</a> |
| Mhun_1792                | <a href="#">ABD41513</a> | multi-sensor signal transduction histidine... | CDD | <a href="#">UniProt</a> | <a href="#">Pfam</a> | <a href="#">InterPro</a> |
| Mhun_1846                | <a href="#">ABD41563</a> | multi-sensor signal transduction histidine... | CDD | <a href="#">UniProt</a> | <a href="#">Pfam</a> | <a href="#">InterPro</a> |
| Mhun_1847                | <a href="#">ABD41564</a> | multi-sensor signal transduction histidine... | CDD | <a href="#">UniProt</a> | <a href="#">Pfam</a> | <a href="#">InterPro</a> |
| Mhun_1943                | <a href="#">ABD41654</a> | multi-sensor signal transduction histidine... | CDD | <a href="#">UniProt</a> | <a href="#">Pfam</a> | <a href="#">InterPro</a> |
| Mhun_1962                | <a href="#">ABD41672</a> | multi-sensor signal transduction histidine... | CDD | <a href="#">UniProt</a> | <a href="#">Pfam</a> | <a href="#">InterPro</a> |
| Mhun_2385                | <a href="#">ABD42087</a> | multi-sensor signal transduction histidine... | CDD | <a href="#">UniProt</a> | <a href="#">Pfam</a> | <a href="#">InterPro</a> |
| Mhun_2636                | <a href="#">ABD42333</a> | signal transduction histidine kinase [Meth... | CDD | <a href="#">UniProt</a> | <a href="#">Pfam</a> | <a href="#">InterPro</a> |
| Mhun_3038                | <a href="#">ABD42725</a> | signal transduction histidine kinase [Meth... | CDD | <a href="#">UniProt</a> | <a href="#">Pfam</a> | <a href="#">InterPro</a> |
| Mhun_3039                | <a href="#">ABD42726</a> | response regulator receiver sensor signal ... | CDD | <a href="#">UniProt</a> | <a href="#">Pfam</a> | <a href="#">InterPro</a> |
| Mhun_3202                | <a href="#">ABD42884</a> | response regulator receiver sensor signal ... | CDD | <a href="#">UniProt</a> | <a href="#">Pfam</a> | <a href="#">InterPro</a> |
| <b>REC-CheB</b>          |                          |                                               |     |                         |                      |                          |
| Mhun_0109                | <a href="#">ABD39887</a> | response regulator receiver (CheY-like) mo... | CDD | <a href="#">UniProt</a> | <a href="#">Pfam</a> | <a href="#">InterPro</a> |
| Mhun_0988                | <a href="#">ABD40738</a> | response regulator receiver (CheY-like) mo... | CDD | <a href="#">UniProt</a> | <a href="#">Pfam</a> | <a href="#">InterPro</a> |
| <b>REC-PAS/GAF</b>       |                          |                                               |     |                         |                      |                          |

|                              |                          |                                               |     |                         |                      |                          |                     |
|------------------------------|--------------------------|-----------------------------------------------|-----|-------------------------|----------------------|--------------------------|---------------------|
| Mhun_0118                    | <a href="#">ABD39895</a> | putative PAS/PAC sensor protein [Methanosp... | CDD | <a href="#">UniProt</a> | <a href="#">Pfam</a> | <a href="#">InterPro</a> |                     |
| Mhun_0455                    | <a href="#">ABD40217</a> | response regulator receiver domain protein... | CDD | <a href="#">UniProt</a> | <a href="#">Pfam</a> | <a href="#">InterPro</a> |                     |
| Mhun_0642                    | <a href="#">ABD40398</a> | putative PAS/PAC sensor protein [Methanosp... | CDD | <a href="#">UniProt</a> | <a href="#">Pfam</a> | <a href="#">InterPro</a> |                     |
| Mhun_1026                    | <a href="#">ABD40776</a> | putative PAS/PAC sensor protein [Methanosp... | CDD | <a href="#">UniProt</a> | <a href="#">Pfam</a> | <a href="#">InterPro</a> |                     |
| Mhun_1267                    | <a href="#">ABD41010</a> | putative PAS/PAC sensor protein [Methanosp... | CDD | <a href="#">UniProt</a> | <a href="#">Pfam</a> | <a href="#">InterPro</a> |                     |
| Mhun_1438                    | <a href="#">ABD41173</a> | putative PAS/PAC sensor protein [Methanosp... | CDD | <a href="#">UniProt</a> | <a href="#">Pfam</a> | <a href="#">InterPro</a> |                     |
| Mhun_2026                    | <a href="#">ABD41735</a> | putative PAS/PAC sensor protein [Methanosp... | CDD | <a href="#">UniProt</a> | <a href="#">Pfam</a> | <a href="#">InterPro</a> |                     |
| Mhun_2671                    | <a href="#">ABD42367</a> | response regulator receiver domain protein... | CDD | <a href="#">UniProt</a> | <a href="#">Pfam</a> | <a href="#">InterPro</a> |                     |
| Mhun_2967                    | <a href="#">ABD42655</a> | putative PAS/PAC sensor protein [Methanosp... | CDD | <a href="#">UniProt</a> | <a href="#">Pfam</a> | <a href="#">InterPro</a> |                     |
| <b>REC-PAS-PAS-MCPsignal</b> |                          |                                               |     |                         |                      |                          |                     |
| Mhun_2551                    | <a href="#">ABD42250</a> | methyl-accepting chemotaxis sensory transd... | CDD | <a href="#">UniProt</a> | <a href="#">Pfam</a> | <a href="#">InterPro</a> |                     |
| <b>Other RRs</b>             |                          |                                               |     |                         |                      |                          |                     |
| Mhun_0264                    | <a href="#">ABD40035</a> | response regulator receiver domain protein... | CDD | <a href="#">UniProt</a> | <a href="#">Pfam</a> | <a href="#">InterPro</a> | (no archaeal hits)  |
| Mhun_0840                    | <a href="#">ABD40592</a> | response regulator receiver domain protein... | CDD | <a href="#">UniProt</a> | <a href="#">Pfam</a> | <a href="#">InterPro</a> | (no archaeal hits)  |
| Mhun_1200                    | <a href="#">ABD40947</a> | response regulator receiver domain protein... | CDD | <a href="#">UniProt</a> | <a href="#">Pfam</a> | <a href="#">InterPro</a> | (no archaeal hits)  |
| Mhun_1290                    | <a href="#">ABD41033</a> | response regulator receiver domain protein... | CDD | <a href="#">UniProt</a> | <a href="#">Pfam</a> | <a href="#">InterPro</a> |                     |
| Mhun_1440                    | <a href="#">ABD41175</a> | putative PAS/PAC sensor protein [Methanosp... | CDD | <a href="#">UniProt</a> | <a href="#">Pfam</a> | <a href="#">InterPro</a> | (REC-PAS-PAS-HisKA) |
| Mhun_1472                    | <a href="#">ABD41206</a> | response regulator receiver domain protein... | CDD | <a href="#">UniProt</a> | <a href="#">Pfam</a> | <a href="#">InterPro</a> | (REC-MetOD2)        |
| Mhun_1572                    | <a href="#">ABD41303</a> | response regulator receiver domain protein... | CDD | <a href="#">UniProt</a> | <a href="#">Pfam</a> | <a href="#">InterPro</a> |                     |
| Mhun_1607                    | <a href="#">ABD41338</a> | response regulator receiver domain protein... | CDD | <a href="#">UniProt</a> | <a href="#">Pfam</a> | <a href="#">InterPro</a> |                     |
| Mhun_1613                    | <a href="#">ABD41344</a> | response regulator receiver domain protein... | CDD | <a href="#">UniProt</a> | <a href="#">Pfam</a> | <a href="#">InterPro</a> | (REC-MetOD2)        |
| Mhun_1618                    | <a href="#">ABD41349</a> | response regulator receiver domain protein... | CDD | <a href="#">UniProt</a> | <a href="#">Pfam</a> | <a href="#">InterPro</a> | (REC-MetOD2)        |
| Mhun_1724                    | <a href="#">ABD41447</a> | response regulator receiver domain protein... | CDD | <a href="#">UniProt</a> | <a href="#">Pfam</a> | <a href="#">InterPro</a> |                     |
| Mhun_2637                    | <a href="#">ABD42334</a> | putative PAS/PAC sensor protein [Methanosp... | CDD | <a href="#">UniProt</a> | <a href="#">Pfam</a> | <a href="#">InterPro</a> | (REC-PAS-HisKA)     |
| Mhun_2638                    | <a href="#">ABD42335</a> | response regulator receiver domain protein... | CDD | <a href="#">UniProt</a> | <a href="#">Pfam</a> | <a href="#">InterPro</a> |                     |
| Mhun_2645                    | <a href="#">ABD42342</a> | putative PAS/PAC sensor protein [Methanosp... | CDD | <a href="#">UniProt</a> | <a href="#">Pfam</a> | <a href="#">InterPro</a> | (REC-PAS-HisKA)     |
| Mhun_2686                    | <a href="#">ABD42381</a> | putative PAS/PAC sensor protein [Methanosp... | CDD | <a href="#">UniProt</a> | <a href="#">Pfam</a> | <a href="#">InterPro</a> | (REC-PAS-HisKA)     |
| Mhun_2691                    | <a href="#">ABD42386</a> | putative PAS/PAC sensor protein [Methanosp... | CDD | <a href="#">UniProt</a> | <a href="#">Pfam</a> | <a href="#">InterPro</a> | (REC-PAS-HisKA)     |
| Mhun_2749                    | <a href="#">ABD42444</a> | response regulator receiver domain protein... | CDD | <a href="#">UniProt</a> | <a href="#">Pfam</a> | <a href="#">InterPro</a> | (REC-HATPase)       |
| Mhun_2968                    | <a href="#">ABD42656</a> | putative PAS/PAC sensor protein [Methanosp... | CDD | <a href="#">UniProt</a> | <a href="#">Pfam</a> | <a href="#">InterPro</a> | (REC-PAS-HisKA)     |
| Mhun_2986                    | <a href="#">ABD42673</a> | putative PAS/PAC sensor protein [Methanosp... | CDD | <a href="#">UniProt</a> | <a href="#">Pfam</a> | <a href="#">InterPro</a> | (REC-PAS-PAS-HisKA) |
| Mhun_3166                    | <a href="#">ABD42848</a> | putative PAS/PAC sensor protein [Methanosp... | CDD | <a href="#">UniProt</a> | <a href="#">Pfam</a> | <a href="#">InterPro</a> | (REC-PAS-xxx)       |

### Methanothermobacter marburgensis str. Marburg

|                     |                          |                                             |     |                         |                      |                          |                   |
|---------------------|--------------------------|---------------------------------------------|-----|-------------------------|----------------------|--------------------------|-------------------|
| <b>HisK, no REC</b> |                          |                                             |     |                         |                      |                          |                   |
| MTBMA_c05730        | <a href="#">ADL58168</a> | predicted sensory transduction histidine... | CDD | <a href="#">UniProt</a> | <a href="#">Pfam</a> | <a href="#">InterPro</a> |                   |
| MTBMA_c06270        | <a href="#">ADL58222</a> | predicted signal transduction histidine ... | CDD | <a href="#">UniProt</a> | <a href="#">Pfam</a> | <a href="#">InterPro</a> |                   |
| MTBMA_c07310        | <a href="#">ADL58326</a> | predicted sensory transduction histidine... | CDD | <a href="#">UniProt</a> | <a href="#">Pfam</a> | <a href="#">InterPro</a> |                   |
| MTBMA_c08400        | <a href="#">ADL58435</a> | predicted sensory transduction histidine... | CDD | <a href="#">UniProt</a> | <a href="#">Pfam</a> | <a href="#">InterPro</a> |                   |
| MTBMA_c08790        | <a href="#">ADL58474</a> | predicted sensory transduction histidine... | CDD | <a href="#">UniProt</a> | <a href="#">Pfam</a> | <a href="#">InterPro</a> |                   |
| MTBMA_c10000        | <a href="#">ADL58595</a> | predicted sensory transduction histidine... | CDD | <a href="#">UniProt</a> | <a href="#">Pfam</a> | <a href="#">InterPro</a> |                   |
| MTBMA_c12200        | <a href="#">ADL58810</a> | predicted sensory transduction histidine... | CDD | <a href="#">UniProt</a> | <a href="#">Pfam</a> | <a href="#">InterPro</a> |                   |
| MTBMA_c13690        | <a href="#">ADL58956</a> | predicted sensory transduction histidine... | CDD | <a href="#">UniProt</a> | <a href="#">Pfam</a> | <a href="#">InterPro</a> |                   |
| MTBMA_c14790        | <a href="#">ADL59058</a> | predicted sensory transduction histidine... | CDD | <a href="#">UniProt</a> | <a href="#">Pfam</a> | <a href="#">InterPro</a> |                   |
| MTBMA_c15070        | <a href="#">ADL59086</a> | predicted signal transduction histidine ... | CDD | <a href="#">UniProt</a> | <a href="#">Pfam</a> | <a href="#">InterPro</a> |                   |
| MTBMA_c16470        | <a href="#">ADL59226</a> | predicted signal transduction histidine ... | CDD | <a href="#">UniProt</a> | <a href="#">Pfam</a> | <a href="#">InterPro</a> |                   |
| <b>REC-HisK</b>     |                          |                                             |     |                         |                      |                          |                   |
| MTBMA_c08420        | <a href="#">ADL58437</a> | predicted sensory transduction histidine... | CDD | <a href="#">UniProt</a> | <a href="#">Pfam</a> | <a href="#">InterPro</a> |                   |
| MTBMA_c08500        | <a href="#">ADL58445</a> | predicted sensory transduction histidine... | CDD | <a href="#">UniProt</a> | <a href="#">Pfam</a> | <a href="#">InterPro</a> |                   |
| MTBMA_c08550        | <a href="#">ADL58450</a> | predicted sensory transduction histidine... | CDD | <a href="#">UniProt</a> | <a href="#">Pfam</a> | <a href="#">InterPro</a> |                   |
| MTBMA_c12950        | <a href="#">ADL58883</a> | predicted sensory transduction histidine... | CDD | <a href="#">UniProt</a> | <a href="#">Pfam</a> | <a href="#">InterPro</a> |                   |
| MTBMA_c12960        | <a href="#">ADL58884</a> | predicted sensory transduction histidine... | CDD | <a href="#">UniProt</a> | <a href="#">Pfam</a> | <a href="#">InterPro</a> |                   |
| <b>REC-PAS</b>      |                          |                                             |     |                         |                      |                          |                   |
| MTBMA_c08360        | <a href="#">ADL58431</a> | predicted sensory transduction regulator... | CDD | <a href="#">UniProt</a> | <a href="#">Pfam</a> | <a href="#">InterPro</a> |                   |
| <b>REC-PAS-GAF</b>  |                          |                                             |     |                         |                      |                          |                   |
| MTBMA_c03410        | <a href="#">ADL57942</a> | predicted signal transduction protein [M... | CDD | <a href="#">UniProt</a> | <a href="#">Pfam</a> | <a href="#">InterPro</a> |                   |
| <b>REC-BcsA</b>     |                          |                                             |     |                         |                      |                          |                   |
| MTBMA_c09390        | <a href="#">ADL58534</a> | predicted sensory transduction regulator... | CDD | <a href="#">UniProt</a> | <a href="#">Pfam</a> | <a href="#">InterPro</a> | (REC-BcsA)        |
| <b>REC-MetOD1</b>   |                          |                                             |     |                         |                      |                          |                   |
| MTBMA_c08430        | <a href="#">ADL58438</a> | predicted sensory transduction regulator... | CDD | <a href="#">UniProt</a> | <a href="#">Pfam</a> | <a href="#">InterPro</a> | (REC-MetOD1)      |
| <b>Other RRs</b>    |                          |                                             |     |                         |                      |                          |                   |
| MTBMA_c01930        | <a href="#">ADL57802</a> | predicted signal transduction protein [M... | CDD | <a href="#">UniProt</a> | <a href="#">Pfam</a> | <a href="#">InterPro</a> | (REC-PAS-GAF-xxx) |

### Methanothermobacter sp. CaT2

|                     |                          |                                              |     |                         |                      |                          |  |
|---------------------|--------------------------|----------------------------------------------|-----|-------------------------|----------------------|--------------------------|--|
| <b>HisK, no REC</b> |                          |                                              |     |                         |                      |                          |  |
| MTCT_0088           | <a href="#">BAM69337</a> | sensory transduction histidine kinase [Me... | CDD | <a href="#">UniProt</a> | <a href="#">Pfam</a> | <a href="#">InterPro</a> |  |
| MTCT_0141           | <a href="#">BAM69390</a> | sensory transduction histidine kinase [Me... | CDD | <a href="#">UniProt</a> | <a href="#">Pfam</a> | <a href="#">InterPro</a> |  |
| MTCT_0244           | <a href="#">BAM69493</a> | sensory transduction histidine kinase [Me... | CDD | <a href="#">UniProt</a> | <a href="#">Pfam</a> | <a href="#">InterPro</a> |  |
| MTCT_0300           | <a href="#">BAM69549</a> | sensory transduction histidine kinase [Me... | CDD | <a href="#">UniProt</a> | <a href="#">Pfam</a> | <a href="#">InterPro</a> |  |
| MTCT_0304           | <a href="#">BAM69553</a> | sensory transduction histidine kinase [Me... | CDD | <a href="#">UniProt</a> | <a href="#">Pfam</a> | <a href="#">InterPro</a> |  |
| MTCT_0384           | <a href="#">BAM69633</a> | sensory transduction histidine kinase [Me... | CDD | <a href="#">UniProt</a> | <a href="#">Pfam</a> | <a href="#">InterPro</a> |  |
| MTCT_0404           | <a href="#">BAM69653</a> | sensory transduction histidine kinase [Me... | CDD | <a href="#">UniProt</a> | <a href="#">Pfam</a> | <a href="#">InterPro</a> |  |

|                    |                          |                                              |     |                         |                      |                                           |
|--------------------|--------------------------|----------------------------------------------|-----|-------------------------|----------------------|-------------------------------------------|
| MTCT_0548          | <a href="#">BAM69797</a> | sensory transduction histidine kinase [Me... | CDD | <a href="#">UniProt</a> | <a href="#">Pfam</a> | <a href="#">InterPro</a>                  |
| MTCT_0739          | <a href="#">BAM69988</a> | sensory transduction histidine kinase [Me... | CDD | <a href="#">UniProt</a> | <a href="#">Pfam</a> | <a href="#">InterPro</a>                  |
| MTCT_0895          | <a href="#">BAM70144</a> | sensory transduction histidine kinase [Me... | CDD | <a href="#">UniProt</a> | <a href="#">Pfam</a> | <a href="#">InterPro</a>                  |
| MTCT_0989          | <a href="#">BAM70237</a> | sensory transduction histidine kinase [Me... | CDD | <a href="#">UniProt</a> | <a href="#">Pfam</a> | <a href="#">InterPro</a>                  |
| MTCT_1151          | <a href="#">BAM70399</a> | sensory transduction histidine kinase [Me... | CDD | <a href="#">UniProt</a> | <a href="#">Pfam</a> | <a href="#">InterPro</a>                  |
| <b>REC only</b>    |                          |                                              |     |                         |                      |                                           |
| MTCT_0385          | <a href="#">BAM69634</a> | sensory transduction regulatory protein [... | CDD | <a href="#">UniProt</a> | <a href="#">Pfam</a> | <a href="#">InterPro</a>                  |
| <b>REC-HisK</b>    |                          |                                              |     |                         |                      |                                           |
| MTCT_0386          | <a href="#">BAM69635</a> | sensory transduction histidine kinase [Me... | CDD | <a href="#">UniProt</a> | <a href="#">Pfam</a> | <a href="#">InterPro</a>                  |
| MTCT_0395          | <a href="#">BAM69644</a> | sensory transduction regulatory protein [... | CDD | <a href="#">UniProt</a> | <a href="#">Pfam</a> | <a href="#">InterPro</a>                  |
| MTCT_0817          | <a href="#">BAM70066</a> | sensory transduction regulatory protein [... | CDD | <a href="#">UniProt</a> | <a href="#">Pfam</a> | <a href="#">InterPro</a>                  |
| MTCT_0818          | <a href="#">BAM70067</a> | sensory transduction histidine kinase [Me... | CDD | <a href="#">UniProt</a> | <a href="#">Pfam</a> | <a href="#">InterPro</a>                  |
| <b>REC-PAS/GAF</b> |                          |                                              |     |                         |                      |                                           |
| MTCT_1611          | <a href="#">BAM70859</a> | sensory transduction regulatory protein [... | CDD | <a href="#">UniProt</a> | <a href="#">Pfam</a> | <a href="#">InterPro</a>                  |
| MTCT_1466          | <a href="#">BAM70714</a> | truncated sensory transduction regulatory... | CDD | <a href="#">UniProt</a> | <a href="#">Pfam</a> | <a href="#">InterPro</a>                  |
| <b>REC-BcsA</b>    |                          |                                              |     |                         |                      |                                           |
| MTCT_0476          | <a href="#">BAM69725</a> | sensory transduction regulatory protein [... | CDD | <a href="#">UniProt</a> | <a href="#">Pfam</a> | <a href="#">InterPro</a> (REC-BcsA)       |
| <b>REC-MetOD1</b>  |                          |                                              |     |                         |                      |                                           |
| MTCT_0380          | <a href="#">BAM69629</a> | sensory transduction regulatory protein [... | CDD | <a href="#">UniProt</a> | <a href="#">Pfam</a> | <a href="#">InterPro</a> (REC-PAS-MetOD1) |
| MTCT_0387          | <a href="#">BAM69636</a> | sensory transduction regulatory protein [... | CDD | <a href="#">UniProt</a> | <a href="#">Pfam</a> | <a href="#">InterPro</a> (REC-MetOD1)     |

### Methanothermobacter thermautotrophicus str. Delta H

#### HisK, no REC

|                    |                          |                                               |     |                         |                      |                                           |
|--------------------|--------------------------|-----------------------------------------------|-----|-------------------------|----------------------|-------------------------------------------|
| MTH_123            | <a href="#">AAB84629</a> | sensory transduction histidine kinase [Met... | CDD | <a href="#">UniProt</a> | <a href="#">Pfam</a> | <a href="#">InterPro</a>                  |
| MTH_174            | <a href="#">AAB84680</a> | sensory transduction histidine kinase [Met... | CDD | <a href="#">UniProt</a> | <a href="#">Pfam</a> | <a href="#">InterPro</a>                  |
| MTH_292            | <a href="#">AAB84798</a> | sensory transduction histidine kinase [Met... | CDD | <a href="#">UniProt</a> | <a href="#">Pfam</a> | <a href="#">InterPro</a>                  |
| MTH_356            | <a href="#">AAB84862</a> | sensory transduction histidine kinase [Met... | CDD | <a href="#">UniProt</a> | <a href="#">Pfam</a> | <a href="#">InterPro</a>                  |
| MTH_360            | <a href="#">AAB84866</a> | sensory transduction histidine kinase [Met... | CDD | <a href="#">UniProt</a> | <a href="#">Pfam</a> | <a href="#">InterPro</a>                  |
| MTH_444            | <a href="#">AAB84950</a> | sensory transduction histidine kinase [Met... | CDD | <a href="#">UniProt</a> | <a href="#">Pfam</a> | <a href="#">InterPro</a>                  |
| MTH_459            | <a href="#">AAB84965</a> | sensory transduction histidine kinase [Met... | CDD | <a href="#">UniProt</a> | <a href="#">Pfam</a> | <a href="#">InterPro</a>                  |
| MTH_468            | <a href="#">AAB84974</a> | sensory transduction histidine kinase [Met... | CDD | <a href="#">UniProt</a> | <a href="#">Pfam</a> | <a href="#">InterPro</a>                  |
| MTH_619            | <a href="#">AAB85125</a> | sensory transduction histidine kinase [Met... | CDD | <a href="#">UniProt</a> | <a href="#">Pfam</a> | <a href="#">InterPro</a>                  |
| MTH_823            | <a href="#">AAB85323</a> | sensory transduction histidine kinase [Met... | CDD | <a href="#">UniProt</a> | <a href="#">Pfam</a> | <a href="#">InterPro</a>                  |
| MTH_985            | <a href="#">AAB85482</a> | sensory transduction histidine kinase [Met... | CDD | <a href="#">UniProt</a> | <a href="#">Pfam</a> | <a href="#">InterPro</a>                  |
| MTH_1124           | <a href="#">AAB85613</a> | sensory transduction histidine kinase [Met... | CDD | <a href="#">UniProt</a> | <a href="#">Pfam</a> | <a href="#">InterPro</a>                  |
| MTH_1260           | <a href="#">AAB85749</a> | sensory transduction histidine kinase [Met... | CDD | <a href="#">UniProt</a> | <a href="#">Pfam</a> | <a href="#">InterPro</a>                  |
| <b>REC only</b>    |                          |                                               |     |                         |                      |                                           |
| MTH445             | <a href="#">AAB84951</a> | sensory transduction regulatory protein [M... | CDD | <a href="#">UniProt</a> | <a href="#">Pfam</a> | <a href="#">InterPro</a>                  |
| <b>REC-HisK</b>    |                          |                                               |     |                         |                      |                                           |
| MTH_446            | <a href="#">AAB84952</a> | sensory transduction regulatory protein [M... | CDD | <a href="#">UniProt</a> | <a href="#">Pfam</a> | <a href="#">InterPro</a>                  |
| MTH_901            | <a href="#">AAB85399</a> | sensory transduction regulatory protein [M... | CDD | <a href="#">UniProt</a> | <a href="#">Pfam</a> | <a href="#">InterPro</a>                  |
| MTH_902            | <a href="#">AAB85400</a> | sensory transduction histidine kinase [Met... | CDD | <a href="#">UniProt</a> | <a href="#">Pfam</a> | <a href="#">InterPro</a>                  |
| <b>REC-PAS/GAF</b> |                          |                                               |     |                         |                      |                                           |
| MTH457             | <a href="#">AAB84963</a> | sensory transduction regulatory protein [M... | CDD | <a href="#">UniProt</a> | <a href="#">Pfam</a> | <a href="#">InterPro</a>                  |
| MTH1764            | <a href="#">AAB86230</a> | sensory transduction regulatory protein [M... | CDD | <a href="#">UniProt</a> | <a href="#">Pfam</a> | <a href="#">InterPro</a>                  |
| <b>REC-BcsA</b>    |                          |                                               |     |                         |                      |                                           |
| MTH548             | <a href="#">AAB85054</a> | sensory transduction regulatory protein [M... | CDD | <a href="#">UniProt</a> | <a href="#">Pfam</a> | <a href="#">InterPro</a> (REC-BcsA)       |
| *MTH549            | <a href="#">AAB85055</a> | sensory transduction regulatory protein [M... | CDD | <a href="#">UniProt</a> | <a href="#">Pfam</a> | <a href="#">InterPro</a>                  |
| <b>REC-MetOD1</b>  |                          |                                               |     |                         |                      |                                           |
| MTH440             | <a href="#">AAB84946</a> | sensory transduction regulatory protein [M... | CDD | <a href="#">UniProt</a> | <a href="#">Pfam</a> | <a href="#">InterPro</a> (REC-PAS-MetOD1) |
| MTH447             | <a href="#">AAB84953</a> | sensory transduction regulatory protein [M... | CDD | <a href="#">UniProt</a> | <a href="#">Pfam</a> | <a href="#">InterPro</a> (REC-MetOD1)     |
| <b>Other RRs</b>   |                          |                                               |     |                         |                      |                                           |
| MTH1607            | <a href="#">AAB86080</a> | sensory transduction regulatory protein [M... | CDD | <a href="#">UniProt</a> | <a href="#">Pfam</a> | <a href="#">InterPro</a> (PAS-GAF-xxx)    |

### Methanothermobacter wolfeii

#### HisK, no REC

|                 |                          |                                              |     |                         |                      |                          |
|-----------------|--------------------------|----------------------------------------------|-----|-------------------------|----------------------|--------------------------|
| MWSIV6_0538     | <a href="#">SCM56481</a> | Sensory transduction histidine kinase {EC... | CDD | <a href="#">UniProt</a> | <a href="#">Pfam</a> | <a href="#">InterPro</a> |
| MWSIV6_0590     | <a href="#">SCM56579</a> | putative sensor histidine kinase pdtaS [M... | CDD | <a href="#">UniProt</a> | <a href="#">Pfam</a> | <a href="#">InterPro</a> |
| MWSIV6_0703     | <a href="#">SCM56787</a> | Sensory transduction histidine kinase {EC... | CDD | <a href="#">UniProt</a> | <a href="#">Pfam</a> | <a href="#">InterPro</a> |
| MWSIV6_0748     | <a href="#">SCM56863</a> | Sensory transduction histidine kinase {EC... | CDD | <a href="#">UniProt</a> | <a href="#">Pfam</a> | <a href="#">InterPro</a> |
| MWSIV6_0752     | <a href="#">SCM56870</a> | Sensory transduction histidine kinase {EC... | CDD | <a href="#">UniProt</a> | <a href="#">Pfam</a> | <a href="#">InterPro</a> |
| MWSIV6_0761     | <a href="#">SCM56887</a> | putative sensor histidine kinase pdtaS [M... | CDD | <a href="#">UniProt</a> | <a href="#">Pfam</a> | <a href="#">InterPro</a> |
| MWSIV6_0842     | <a href="#">SCM57028</a> | putative sensor histidine kinase pdtaS [M... | CDD | <a href="#">UniProt</a> | <a href="#">Pfam</a> | <a href="#">InterPro</a> |
| MWSIV6_0847     | <a href="#">SCM57037</a> | Sensory transduction histidine kinase {EC... | CDD | <a href="#">UniProt</a> | <a href="#">Pfam</a> | <a href="#">InterPro</a> |
| MWSIV6_0868     | <a href="#">SCM57073</a> | putative sensory transduction histidine k... | CDD | <a href="#">UniProt</a> | <a href="#">Pfam</a> | <a href="#">InterPro</a> |
| MWSIV6_0994     | <a href="#">SCM57299</a> | putative sensor histidine kinase pdtaS [M... | CDD | <a href="#">UniProt</a> | <a href="#">Pfam</a> | <a href="#">InterPro</a> |
| MWSIV6_1199     | <a href="#">SCM57679</a> | Sensor protein FixL [Methanothermobacter ... | CDD | <a href="#">UniProt</a> | <a href="#">Pfam</a> | <a href="#">InterPro</a> |
| MWSIV6_1373     | <a href="#">SCM57984</a> | Methyl sulfide methyltransferase-associat... | CDD | <a href="#">UniProt</a> | <a href="#">Pfam</a> | <a href="#">InterPro</a> |
| MWSIV6_1516     | <a href="#">SCM58236</a> | Sensory transduction histidine kinase {EC... | CDD | <a href="#">UniProt</a> | <a href="#">Pfam</a> | <a href="#">InterPro</a> |
| *MWSIV6_1515    | <a href="#">SCM58234</a> | putative signal transduction histidine ki... | CDD | <a href="#">UniProt</a> | <a href="#">Pfam</a> | <a href="#">InterPro</a> |
| MWSIV6_1652     | <a href="#">SCM58475</a> | Sensory transduction histidine kinase {EC... | CDD | <a href="#">UniProt</a> | <a href="#">Pfam</a> | <a href="#">InterPro</a> |
| <b>REC only</b> |                          |                                              |     |                         |                      |                          |
| MWSIV6_0829     | <a href="#">SCM57006</a> | putative methanogenesis regulatory protei... | CDD | <a href="#">UniProt</a> | <a href="#">Pfam</a> | <a href="#">InterPro</a> |
| <b>REC-HisK</b> |                          |                                              |     |                         |                      |                          |
| MWSIV6_0830     | <a href="#">SCM57008</a> | putative sensor histidine kinase pdtaS [M... | CDD | <a href="#">UniProt</a> | <a href="#">Pfam</a> | <a href="#">InterPro</a> |
| MWSIV6_1274     | <a href="#">SCM57813</a> | putative transcriptional regulatory prote... | CDD | <a href="#">UniProt</a> | <a href="#">Pfam</a> | <a href="#">InterPro</a> |
| MWSIV6_1275     | <a href="#">SCM57815</a> | Nodulation protein V [Methanothermobacter... | CDD | <a href="#">UniProt</a> | <a href="#">Pfam</a> | <a href="#">InterPro</a> |

|                    |                          |                                               |                     |                         |                      |                          |                  |
|--------------------|--------------------------|-----------------------------------------------|---------------------|-------------------------|----------------------|--------------------------|------------------|
| <b>REC-PAS/GAF</b> |                          |                                               |                     |                         |                      |                          |                  |
| MWSIV6_0305        | <a href="#">SCM56061</a> | Acetoacetate metabolism regulatory protei...  | <a href="#">CDD</a> | <a href="#">UniProt</a> | <a href="#">Pfam</a> | <a href="#">InterPro</a> |                  |
| MWSIV6_0841        | <a href="#">SCM57027</a> | KDP operon transcriptional regulatory pro...  | <a href="#">CDD</a> | <a href="#">UniProt</a> | <a href="#">Pfam</a> | <a href="#">InterPro</a> |                  |
| <b>REC-BcsA</b>    |                          |                                               |                     |                         |                      |                          |                  |
| MWSIV6_0915        | <a href="#">SCM57154</a> | putative glycosyltransferase YdaM [Methan...  | <a href="#">CDD</a> | <a href="#">UniProt</a> | <a href="#">Pfam</a> | <a href="#">InterPro</a> | (REC-BcsA)       |
| <b>REC-MetOD1</b>  |                          |                                               |                     |                         |                      |                          |                  |
| MWSIV6_0824        | <a href="#">SCM56997</a> | putative transcriptional regulatory prote...  | <a href="#">CDD</a> | <a href="#">UniProt</a> | <a href="#">Pfam</a> | <a href="#">InterPro</a> | (REC-PAS-MetOD1) |
| MWSIV6_0831        | <a href="#">SCM57009</a> | putative transcriptional regulatory prote...  | <a href="#">CDD</a> | <a href="#">UniProt</a> | <a href="#">Pfam</a> | <a href="#">InterPro</a> | (REC-MetOD1)     |
| <b>Other RRs</b>   |                          |                                               |                     |                         |                      |                          |                  |
| MWSIV6_0153        | <a href="#">SCM55785</a> | Sensory transduction regulatory protein [...] | <a href="#">CDD</a> | <a href="#">UniProt</a> | <a href="#">Pfam</a> | <a href="#">InterPro</a> | (REC-GAF-xxx)    |

### Methanothermococcus okinawensis

|                     |                          |                                               |                     |                         |                      |                          |  |
|---------------------|--------------------------|-----------------------------------------------|---------------------|-------------------------|----------------------|--------------------------|--|
| <b>HisK, no REC</b> |                          |                                               |                     |                         |                      |                          |  |
| Metok_1036          | <a href="#">AEH07006</a> | integral membrane sensor signal transducti... | <a href="#">CDD</a> | <a href="#">UniProt</a> | <a href="#">Pfam</a> | <a href="#">InterPro</a> |  |
| Metok_1419          | <a href="#">AEH07384</a> | CheA signal transduction histidine kinase ... | <a href="#">CDD</a> | <a href="#">UniProt</a> | <a href="#">Pfam</a> | <a href="#">InterPro</a> |  |
| <b>REC only</b>     |                          |                                               |                     |                         |                      |                          |  |
| Metok_1037          | <a href="#">AEH07007</a> | response regulator receiver protein [Metha... | <a href="#">CDD</a> | <a href="#">UniProt</a> | <a href="#">Pfam</a> | <a href="#">InterPro</a> |  |
| Metok_1412          | <a href="#">AEH07377</a> | response regulator receiver protein [Metha... | <a href="#">CDD</a> | <a href="#">UniProt</a> | <a href="#">Pfam</a> | <a href="#">InterPro</a> |  |
| <b>REC-CheB</b>     |                          |                                               |                     |                         |                      |                          |  |
| Metok_1420          | <a href="#">AEH07385</a> | response regulator receiver modulated Chem... | <a href="#">CDD</a> | <a href="#">UniProt</a> | <a href="#">Pfam</a> | <a href="#">InterPro</a> |  |

### Natrialba magadii ATCC 43099

|                     |                          |                                               |                     |                         |                      |                          |             |
|---------------------|--------------------------|-----------------------------------------------|---------------------|-------------------------|----------------------|--------------------------|-------------|
| <b>HisK, no REC</b> |                          |                                               |                     |                         |                      |                          |             |
| Nmag_0168           | <a href="#">ADD03760</a> | sensor box histidine kinase [Natrialba mag... | <a href="#">CDD</a> | <a href="#">UniProt</a> | <a href="#">Pfam</a> | <a href="#">InterPro</a> |             |
| Nmag_0323           | <a href="#">ADD03914</a> | sensor box histidine kinase [Natrialba mag... | <a href="#">CDD</a> | <a href="#">UniProt</a> | <a href="#">Pfam</a> | <a href="#">InterPro</a> |             |
| Nmag_0435           | <a href="#">ADD04023</a> | histidine kinase [Natrialba magadii ATCC 4... | <a href="#">CDD</a> | <a href="#">UniProt</a> | <a href="#">Pfam</a> | <a href="#">InterPro</a> |             |
| Nmag_1296           | <a href="#">ADD04876</a> | histidine kinase [Natrialba magadii ATCC 4... | <a href="#">CDD</a> | <a href="#">UniProt</a> | <a href="#">Pfam</a> | <a href="#">InterPro</a> |             |
| Nmag_2062           | <a href="#">ADD05632</a> | sensor box histidine kinase [Natrialba mag... | <a href="#">CDD</a> | <a href="#">UniProt</a> | <a href="#">Pfam</a> | <a href="#">InterPro</a> |             |
| Nmag_2888           | <a href="#">ADD06441</a> | taxis sensor histidine kinase CheA [Natria... | <a href="#">CDD</a> | <a href="#">UniProt</a> | <a href="#">Pfam</a> | <a href="#">InterPro</a> |             |
| Nmag_3106           | <a href="#">ADD06658</a> | sensor box histidine kinase [Natrialba mag... | <a href="#">CDD</a> | <a href="#">UniProt</a> | <a href="#">Pfam</a> | <a href="#">InterPro</a> |             |
| Nmag_3149           | <a href="#">ADD06701</a> | taxis sensor histidine kinase CheA [Natria... | <a href="#">CDD</a> | <a href="#">UniProt</a> | <a href="#">Pfam</a> | <a href="#">InterPro</a> |             |
| Nmag_3188           | <a href="#">ADD06738</a> | histidine kinase [Natrialba magadii ATCC 4... | <a href="#">CDD</a> | <a href="#">UniProt</a> | <a href="#">Pfam</a> | <a href="#">InterPro</a> |             |
| Nmag_3216           | <a href="#">ADD06766</a> | sensor box histidine kinase [Natrialba mag... | <a href="#">CDD</a> | <a href="#">UniProt</a> | <a href="#">Pfam</a> | <a href="#">InterPro</a> |             |
| Nmag_3297           | <a href="#">ADD06847</a> | sensor box histidine kinase [Natrialba mag... | <a href="#">CDD</a> | <a href="#">UniProt</a> | <a href="#">Pfam</a> | <a href="#">InterPro</a> |             |
| Nmag_3535           | <a href="#">ADD07085</a> | sensor box histidine kinase [Natrialba mag... | <a href="#">CDD</a> | <a href="#">UniProt</a> | <a href="#">Pfam</a> | <a href="#">InterPro</a> |             |
| Nmag_3954           | <a href="#">ADD07494</a> | sensor box histidine kinase (plasmid) [Nat... | <a href="#">CDD</a> | <a href="#">UniProt</a> | <a href="#">Pfam</a> | <a href="#">InterPro</a> |             |
| Nmag_4064           | <a href="#">ADD07590</a> | sensor box histidine kinase (plasmid) [Nat... | <a href="#">CDD</a> | <a href="#">UniProt</a> | <a href="#">Pfam</a> | <a href="#">InterPro</a> |             |
| Nmag_4101           | <a href="#">ADD07622</a> | sensor box histidine kinase (plasmid) [Nat... | <a href="#">CDD</a> | <a href="#">UniProt</a> | <a href="#">Pfam</a> | <a href="#">InterPro</a> |             |
| Nmag_4114           | <a href="#">ADD07633</a> | histidine kinase (plasmid) [Natrialba maga... | <a href="#">CDD</a> | <a href="#">UniProt</a> | <a href="#">Pfam</a> | <a href="#">InterPro</a> |             |
| <b>REC only</b>     |                          |                                               |                     |                         |                      |                          |             |
| Nmag_0951           | <a href="#">ADD04535</a> | receiver box response regulator [Natrialba... | <a href="#">CDD</a> | <a href="#">UniProt</a> | <a href="#">Pfam</a> | <a href="#">InterPro</a> |             |
| Nmag_1095           | <a href="#">ADD04679</a> | receiver box response regulator [Natrialba... | <a href="#">CDD</a> | <a href="#">UniProt</a> | <a href="#">Pfam</a> | <a href="#">InterPro</a> |             |
| Nmag_1130           | <a href="#">ADD04714</a> | receiver box response regulator [Natrialba... | <a href="#">CDD</a> | <a href="#">UniProt</a> | <a href="#">Pfam</a> | <a href="#">InterPro</a> |             |
| Nmag_1797           | <a href="#">ADD05371</a> | receiver box response regulator [Natrialba... | <a href="#">CDD</a> | <a href="#">UniProt</a> | <a href="#">Pfam</a> | <a href="#">InterPro</a> |             |
| Nmag_2693           | <a href="#">ADD06249</a> | receiver box response regulator [Natrialba... | <a href="#">CDD</a> | <a href="#">UniProt</a> | <a href="#">Pfam</a> | <a href="#">InterPro</a> |             |
| Nmag_2877           | <a href="#">ADD06430</a> | response regulator CheY [Natrialba magadii... | <a href="#">CDD</a> | <a href="#">UniProt</a> | <a href="#">Pfam</a> | <a href="#">InterPro</a> |             |
| Nmag_3151           | <a href="#">ADD06703</a> | response regulator CheY [Natrialba magadii... | <a href="#">CDD</a> | <a href="#">UniProt</a> | <a href="#">Pfam</a> | <a href="#">InterPro</a> |             |
| Nmag_3379           | <a href="#">ADD06929</a> | receiver box response regulator [Natrialba... | <a href="#">CDD</a> | <a href="#">UniProt</a> | <a href="#">Pfam</a> | <a href="#">InterPro</a> |             |
| Nmag_3389           | <a href="#">ADD06939</a> | receiver box response regulator [Natrialba... | <a href="#">CDD</a> | <a href="#">UniProt</a> | <a href="#">Pfam</a> | <a href="#">InterPro</a> |             |
| Nmag_3679           | <a href="#">ADD07225</a> | receiver box response regulator (plasmid) ... | <a href="#">CDD</a> | <a href="#">UniProt</a> | <a href="#">Pfam</a> | <a href="#">InterPro</a> |             |
| <b>REC-HisK</b>     |                          |                                               |                     |                         |                      |                          |             |
| Nmag_2042           | <a href="#">ADD05612</a> | receiver/sensor box histidine kinase [Natr... | <a href="#">CDD</a> | <a href="#">UniProt</a> | <a href="#">Pfam</a> | <a href="#">InterPro</a> |             |
| Nmag_3740           | <a href="#">ADD07282</a> | receiver/sensor box histidine kinase (plas... | <a href="#">CDD</a> | <a href="#">UniProt</a> | <a href="#">Pfam</a> | <a href="#">InterPro</a> |             |
| <b>REC-CheB</b>     |                          |                                               |                     |                         |                      |                          |             |
| Nmag_2887           | <a href="#">ADD06440</a> | protein-glutamate methylesterase CheB [Nat... | <a href="#">CDD</a> | <a href="#">UniProt</a> | <a href="#">Pfam</a> | <a href="#">InterPro</a> |             |
| Nmag_3150           | <a href="#">ADD06702</a> | protein-glutamate methylesterase CheB [Nat... | <a href="#">CDD</a> | <a href="#">UniProt</a> | <a href="#">Pfam</a> | <a href="#">InterPro</a> |             |
| <b>REC-HalX</b>     |                          |                                               |                     |                         |                      |                          |             |
| Nmag_3536           | <a href="#">ADD07086</a> | receiver box response regulator [Natrialba... | <a href="#">CDD</a> | <a href="#">UniProt</a> | <a href="#">Pfam</a> | <a href="#">InterPro</a> |             |
| Nmag_3741           | <a href="#">ADD07283</a> | receiver box response regulator (plasmid) ... | <a href="#">CDD</a> | <a href="#">UniProt</a> | <a href="#">Pfam</a> | <a href="#">InterPro</a> |             |
| <b>HlxR-REC</b>     |                          |                                               |                     |                         |                      |                          |             |
| Nmag_2044           | <a href="#">ADD05614</a> | HxlR family transcription regulator / rece... | <a href="#">CDD</a> | <a href="#">UniProt</a> | <a href="#">Pfam</a> | <a href="#">InterPro</a> | (wHTH-REC)  |
| <b>BAT</b>          |                          |                                               |                     |                         |                      |                          |             |
| Nmag_1012           | <a href="#">ADD04596</a> | receiver/sensor box HTH-10 family transcri... | <a href="#">CDD</a> | <a href="#">UniProt</a> | <a href="#">Pfam</a> | <a href="#">InterPro</a> |             |
| Nmag_2147           | <a href="#">ADD05716</a> | receiver/bat box HTH-10 family transcripti... | <a href="#">CDD</a> | <a href="#">UniProt</a> | <a href="#">Pfam</a> | <a href="#">InterPro</a> |             |
| Nmag_2692           | <a href="#">ADD06248</a> | receiver/bat box HTH-10 family transcripti... | <a href="#">CDD</a> | <a href="#">UniProt</a> | <a href="#">Pfam</a> | <a href="#">InterPro</a> |             |
| Nmag_3054           | <a href="#">ADD06606</a> | sensor/bat box HTH-10 family transcription... | <a href="#">CDD</a> | <a href="#">UniProt</a> | <a href="#">Pfam</a> | <a href="#">InterPro</a> |             |
| <b>Other RRs</b>    |                          |                                               |                     |                         |                      |                          |             |
| Nmag_2043           | <a href="#">ADD05613</a> | receiver box response regulator [Natrialba... | <a href="#">CDD</a> | <a href="#">UniProt</a> | <a href="#">Pfam</a> | <a href="#">InterPro</a> | (REC-xHisK) |

### Natrialbaceae archaeon JW/NM-HA 15

|                     |                          |                                               |                     |                         |                      |                          |  |
|---------------------|--------------------------|-----------------------------------------------|---------------------|-------------------------|----------------------|--------------------------|--|
| <b>HisK, no REC</b> |                          |                                               |                     |                         |                      |                          |  |
| B1756_00280         | <a href="#">ARS91605</a> | histidine kinase [Natrialbaceae archaeon ...] | <a href="#">CDD</a> | <a href="#">UniProt</a> | <a href="#">Pfam</a> | <a href="#">InterPro</a> |  |
| B1756_00460         | <a href="#">ARS88377</a> | hypothetical protein B1756_00460 [Natrial...  | <a href="#">CDD</a> | <a href="#">UniProt</a> | <a href="#">Pfam</a> | <a href="#">InterPro</a> |  |
| B1756_02660         | <a href="#">ARS88765</a> | hypothetical protein B1756_02660 [Natrial...  | <a href="#">CDD</a> | <a href="#">UniProt</a> | <a href="#">Pfam</a> | <a href="#">InterPro</a> |  |
| B1756_02685         | <a href="#">ARS88770</a> | chemotaxis protein CheA [Natrialbaceae ar...  | <a href="#">CDD</a> | <a href="#">UniProt</a> | <a href="#">Pfam</a> | <a href="#">InterPro</a> |  |
| B1756_03155         | <a href="#">ARS88850</a> | hypothetical protein B1756_03155 [Natrial...  | <a href="#">CDD</a> | <a href="#">UniProt</a> | <a href="#">Pfam</a> | <a href="#">InterPro</a> |  |



|                  |                          |                                              |     |                         |                      |                          |             |
|------------------|--------------------------|----------------------------------------------|-----|-------------------------|----------------------|--------------------------|-------------|
| B1756_03245      | <a href="#">ARS88865</a> | hypothetical protein B1756_03245 [Natrial... | CDD | <a href="#">UniProt</a> | <a href="#">Pfam</a> | <a href="#">InterPro</a> |             |
| B1756_03310      | <a href="#">ARS88877</a> | hypothetical protein B1756_03310 [Natrial... | CDD | <a href="#">UniProt</a> | <a href="#">Pfam</a> | <a href="#">InterPro</a> |             |
| B1756_04810      | <a href="#">ARS89140</a> | PAS domain-containing sensor histidine ki... | CDD | <a href="#">UniProt</a> | <a href="#">Pfam</a> | <a href="#">InterPro</a> |             |
| B1756_05205      | <a href="#">ARS89202</a> | histidine kinase [Natrialbaceae archaeon ... | CDD | <a href="#">UniProt</a> | <a href="#">Pfam</a> | <a href="#">InterPro</a> |             |
| B1756_05510      | <a href="#">ARS91700</a> | hypothetical protein B1756_05510 [Natrial... | CDD | <a href="#">UniProt</a> | <a href="#">Pfam</a> | <a href="#">InterPro</a> |             |
| B1756_06735      | <a href="#">ARS89470</a> | hypothetical protein B1756_06735 [Natrial... | CDD | <a href="#">UniProt</a> | <a href="#">Pfam</a> | <a href="#">InterPro</a> |             |
| B1756_08005      | <a href="#">ARS89689</a> | histidine kinase [Natrialbaceae archaeon ... | CDD | <a href="#">UniProt</a> | <a href="#">Pfam</a> | <a href="#">InterPro</a> |             |
| B1756_08185      | <a href="#">ARS89720</a> | hypothetical protein B1756_08185 [Natrial... | CDD | <a href="#">UniProt</a> | <a href="#">Pfam</a> | <a href="#">InterPro</a> |             |
| B1756_09130      | <a href="#">ARS89881</a> | hypothetical protein B1756_09130 [Natrial... | CDD | <a href="#">UniProt</a> | <a href="#">Pfam</a> | <a href="#">InterPro</a> |             |
| B1756_10135      | <a href="#">ARS90050</a> | PAS domain-containing sensor histidine ki... | CDD | <a href="#">UniProt</a> | <a href="#">Pfam</a> | <a href="#">InterPro</a> |             |
| B1756_11295      | <a href="#">ARS90250</a> | hypothetical protein B1756_11295 [Natrial... | CDD | <a href="#">UniProt</a> | <a href="#">Pfam</a> | <a href="#">InterPro</a> |             |
| B1756_13070      | <a href="#">ARS90563</a> | hypothetical protein B1756_13070 [Natrial... | CDD | <a href="#">UniProt</a> | <a href="#">Pfam</a> | <a href="#">InterPro</a> |             |
| B1756_14660      | <a href="#">ARS90842</a> | hypothetical protein B1756_14660 [Natrial... | CDD | <a href="#">UniProt</a> | <a href="#">Pfam</a> | <a href="#">InterPro</a> |             |
| B1756_14665      | <a href="#">ARS90843</a> | PAS domain-containing sensor histidine ki... | CDD | <a href="#">UniProt</a> | <a href="#">Pfam</a> | <a href="#">InterPro</a> |             |
| B1756_14930      | <a href="#">ARS90894</a> | hypothetical protein B1756_14930 [Natrial... | CDD | <a href="#">UniProt</a> | <a href="#">Pfam</a> | <a href="#">InterPro</a> |             |
| B1756_16740      | <a href="#">ARS91211</a> | hypothetical protein B1756_16740 [Natrial... | CDD | <a href="#">UniProt</a> | <a href="#">Pfam</a> | <a href="#">InterPro</a> |             |
| B1756_16745      | <a href="#">ARS91212</a> | hypothetical protein B1756_16745 [Natrial... | CDD | <a href="#">UniProt</a> | <a href="#">Pfam</a> | <a href="#">InterPro</a> |             |
| B1756_16750      | <a href="#">ARS91213</a> | hypothetical protein B1756_16750 [Natrial... | CDD | <a href="#">UniProt</a> | <a href="#">Pfam</a> | <a href="#">InterPro</a> |             |
| B1756_17185      | <a href="#">ARS91283</a> | hypothetical protein B1756_17185 [Natrial... | CDD | <a href="#">UniProt</a> | <a href="#">Pfam</a> | <a href="#">InterPro</a> |             |
| B1756_17710      | <a href="#">ARS91374</a> | hypothetical protein B1756_17710 [Natrial... | CDD | <a href="#">UniProt</a> | <a href="#">Pfam</a> | <a href="#">InterPro</a> |             |
| B1756_17815      | <a href="#">ARS91392</a> | hypothetical protein B1756_17815 [Natrial... | CDD | <a href="#">UniProt</a> | <a href="#">Pfam</a> | <a href="#">InterPro</a> |             |
| B1756_18170      | <a href="#">ARS91456</a> | hypothetical protein B1756_18170 [Natrial... | CDD | <a href="#">UniProt</a> | <a href="#">Pfam</a> | <a href="#">InterPro</a> |             |
| B1756_18270      | <a href="#">ARS91475</a> | histidine kinase [Natrialbaceae archaeon ... | CDD | <a href="#">UniProt</a> | <a href="#">Pfam</a> | <a href="#">InterPro</a> |             |
| B1756_18940      | <a href="#">ARS91593</a> | hypothetical protein B1756_18940 [Natrial... | CDD | <a href="#">UniProt</a> | <a href="#">Pfam</a> | <a href="#">InterPro</a> |             |
| <b>REC only</b>  |                          |                                              |     |                         |                      |                          |             |
| B1756_02720      | <a href="#">ARS88777</a> | response regulator [Natrialbaceae archaeo... | CDD | <a href="#">UniProt</a> | <a href="#">Pfam</a> | <a href="#">InterPro</a> |             |
| B1756_03235      | <a href="#">ARS88863</a> | response regulator [Natrialbaceae archaeo... | CDD | <a href="#">UniProt</a> | <a href="#">Pfam</a> | <a href="#">InterPro</a> |             |
| B1756_05620      | <a href="#">ARS89274</a> | response regulator [Natrialbaceae archaeo... | CDD | <a href="#">UniProt</a> | <a href="#">Pfam</a> | <a href="#">InterPro</a> |             |
| B1756_05735      | <a href="#">ARS89293</a> | response regulator [Natrialbaceae archaeo... | CDD | <a href="#">UniProt</a> | <a href="#">Pfam</a> | <a href="#">InterPro</a> |             |
| B1756_11110      | <a href="#">ARS90219</a> | response regulator [Natrialbaceae archaeo... | CDD | <a href="#">UniProt</a> | <a href="#">Pfam</a> | <a href="#">InterPro</a> |             |
| B1756_16040      | <a href="#">ARS91093</a> | response regulator [Natrialbaceae archaeo... | CDD | <a href="#">UniProt</a> | <a href="#">Pfam</a> | <a href="#">InterPro</a> |             |
| <b>REC-HisK</b>  |                          |                                              |     |                         |                      |                          |             |
| B1756_07945      | <a href="#">ARS89679</a> | hybrid sensor histidine kinase/response r... | CDD | <a href="#">UniProt</a> | <a href="#">Pfam</a> | <a href="#">InterPro</a> |             |
| B1756_10015      | <a href="#">ARS90029</a> | hybrid sensor histidine kinase/response r... | CDD | <a href="#">UniProt</a> | <a href="#">Pfam</a> | <a href="#">InterPro</a> |             |
| B1756_13745      | <a href="#">ARS90686</a> | hypothetical protein B1756_13745 [Natrial... | CDD | <a href="#">UniProt</a> | <a href="#">Pfam</a> | <a href="#">InterPro</a> |             |
| B1756_16090      | <a href="#">ARS91893</a> | hypothetical protein B1756_16090 [Natrial... | CDD | <a href="#">UniProt</a> | <a href="#">Pfam</a> | <a href="#">InterPro</a> |             |
| B1756_17180      | <a href="#">ARS91282</a> | hybrid sensor histidine kinase/response r... | CDD | <a href="#">UniProt</a> | <a href="#">Pfam</a> | <a href="#">InterPro</a> |             |
| B1756_17715      | <a href="#">ARS91375</a> | hypothetical protein B1756_17715 [Natrial... | CDD | <a href="#">UniProt</a> | <a href="#">Pfam</a> | <a href="#">InterPro</a> |             |
| B1756_18395      | <a href="#">ARS91498</a> | hypothetical protein B1756_18395 [Natrial... | CDD | <a href="#">UniProt</a> | <a href="#">Pfam</a> | <a href="#">InterPro</a> |             |
| <b>REC-CheB</b>  |                          |                                              |     |                         |                      |                          |             |
| B1756_02690      | <a href="#">ARS88771</a> | chemotaxis response regulator protein-glu... | CDD | <a href="#">UniProt</a> | <a href="#">Pfam</a> | <a href="#">InterPro</a> |             |
| <b>REC-GAF</b>   |                          |                                              |     |                         |                      |                          |             |
| B1756_04385      | <a href="#">ARS89068</a> | diguanylate cyclase [Natrialbaceae archae... | CDD | <a href="#">UniProt</a> | <a href="#">Pfam</a> | <a href="#">InterPro</a> |             |
| <b>REC-HalX</b>  |                          |                                              |     |                         |                      |                          |             |
| B1756_17720      | <a href="#">ARS91376</a> | hypothetical protein B1756_17720 [Natrial... | CDD | <a href="#">UniProt</a> | <a href="#">Pfam</a> | <a href="#">InterPro</a> |             |
| B1756_18265      | <a href="#">ARS91474</a> | DNA-binding protein [Natrialbaceae archae... | CDD | <a href="#">UniProt</a> | <a href="#">Pfam</a> | <a href="#">InterPro</a> |             |
| <b>WHTH-REC</b>  |                          |                                              |     |                         |                      |                          |             |
| B1756_04815      | <a href="#">ARS89141</a> | response regulator [Natrialbaceae archaeo... | CDD | <a href="#">UniProt</a> | <a href="#">Pfam</a> | <a href="#">InterPro</a> | (WHTH-REC)  |
| B1756_07935      | <a href="#">ARS89677</a> | HxlR family transcriptional regulator [Na... | CDD | <a href="#">UniProt</a> | <a href="#">Pfam</a> | <a href="#">InterPro</a> | (WHTH-REC)  |
| <b>BAT</b>       |                          |                                              |     |                         |                      |                          |             |
| B1756_04700      | <a href="#">ARS91678</a> | diguanylate cyclase [Natrialbaceae archae... | CDD | <a href="#">UniProt</a> | <a href="#">Pfam</a> | <a href="#">InterPro</a> |             |
| B1756_07405      | <a href="#">ARS89584</a> | diguanylate cyclase [Natrialbaceae archae... | CDD | <a href="#">UniProt</a> | <a href="#">Pfam</a> | <a href="#">InterPro</a> |             |
| <b>Other RRs</b> |                          |                                              |     |                         |                      |                          |             |
| B1756_07940      | <a href="#">ARS89678</a> | hypothetical protein B1756_07940 [Natrial... | CDD | <a href="#">UniProt</a> | <a href="#">Pfam</a> | <a href="#">InterPro</a> | (REC-xHisK) |

### [Natrinema pellirubrum DSM 15624](#)

#### **HisK, no REC**

|            |                          |                                               |     |                         |                      |                          |  |
|------------|--------------------------|-----------------------------------------------|-----|-------------------------|----------------------|--------------------------|--|
| Natpe_0091 | <a href="#">AGB30037</a> | PAS domain S-box [Natrinema pellirubrum DS... | CDD | <a href="#">UniProt</a> | <a href="#">Pfam</a> | <a href="#">InterPro</a> |  |
| Natpe_0202 | <a href="#">AGB30142</a> | PAS domain S-box [Natrinema pellirubrum DS... | CDD | <a href="#">UniProt</a> | <a href="#">Pfam</a> | <a href="#">InterPro</a> |  |
| Natpe_0405 | <a href="#">AGB30336</a> | PAS domain S-box [Natrinema pellirubrum DS... | CDD | <a href="#">UniProt</a> | <a href="#">Pfam</a> | <a href="#">InterPro</a> |  |
| Natpe_1306 | <a href="#">AGB31211</a> | PAS domain S-box [Natrinema pellirubrum DS... | CDD | <a href="#">UniProt</a> | <a href="#">Pfam</a> | <a href="#">InterPro</a> |  |
| Natpe_1362 | <a href="#">AGB31266</a> | histidine kinase [Natrinema pellirubrum DS... | CDD | <a href="#">UniProt</a> | <a href="#">Pfam</a> | <a href="#">InterPro</a> |  |
| Natpe_1630 | <a href="#">AGB31527</a> | PAS domain S-box [Natrinema pellirubrum DS... | CDD | <a href="#">UniProt</a> | <a href="#">Pfam</a> | <a href="#">InterPro</a> |  |
| Natpe_1774 | <a href="#">AGB31663</a> | histidine kinase [Natrinema pellirubrum DS... | CDD | <a href="#">UniProt</a> | <a href="#">Pfam</a> | <a href="#">InterPro</a> |  |
| Natpe_2091 | <a href="#">AGB31920</a> | PAS domain S-box [Natrinema pellirubrum DS... | CDD | <a href="#">UniProt</a> | <a href="#">Pfam</a> | <a href="#">InterPro</a> |  |
| Natpe_2130 | <a href="#">AGB31959</a> | bacteriophytochrome (light-regulated signa... | CDD | <a href="#">UniProt</a> | <a href="#">Pfam</a> | <a href="#">InterPro</a> |  |
| Natpe_1778 | <a href="#">AGB31667</a> | histidine kinase [Natrinema pellirubrum DS... | CDD | <a href="#">UniProt</a> | <a href="#">Pfam</a> | <a href="#">InterPro</a> |  |
| Natpe_2301 | <a href="#">AGB32121</a> | signal transduction histidine kinase [Natr... | CDD | <a href="#">UniProt</a> | <a href="#">Pfam</a> | <a href="#">InterPro</a> |  |
| Natpe_2392 | <a href="#">AGB32208</a> | PAS domain S-box [Natrinema pellirubrum DS... | CDD | <a href="#">UniProt</a> | <a href="#">Pfam</a> | <a href="#">InterPro</a> |  |
| Natpe_2522 | <a href="#">AGB32334</a> | signal transduction histidine kinase [Natr... | CDD | <a href="#">UniProt</a> | <a href="#">Pfam</a> | <a href="#">InterPro</a> |  |
| Natpe_2613 | <a href="#">AGB32421</a> | PAS domain S-box [Natrinema pellirubrum DS... | CDD | <a href="#">UniProt</a> | <a href="#">Pfam</a> | <a href="#">InterPro</a> |  |
| Natpe_2661 | <a href="#">AGB32467</a> | chemotaxis protein histidine kinase-like p... | CDD | <a href="#">UniProt</a> | <a href="#">Pfam</a> | <a href="#">InterPro</a> |  |
| Natpe_3074 | <a href="#">AGB32867</a> | PAS domain S-box [Natrinema pellirubrum DS... | CDD | <a href="#">UniProt</a> | <a href="#">Pfam</a> | <a href="#">InterPro</a> |  |
| Natpe_3111 | <a href="#">AGB32904</a> | PAS domain S-box [Natrinema pellirubrum DS... | CDD | <a href="#">UniProt</a> | <a href="#">Pfam</a> | <a href="#">InterPro</a> |  |
| Natpe_3358 | <a href="#">AGB33145</a> | PAS domain S-box [Natrinema pellirubrum DS... | CDD | <a href="#">UniProt</a> | <a href="#">Pfam</a> | <a href="#">InterPro</a> |  |
| Natpe_3397 | <a href="#">AGB33183</a> | PAS domain S-box [Natrinema pellirubrum DS... | CDD | <a href="#">UniProt</a> | <a href="#">Pfam</a> | <a href="#">InterPro</a> |  |
| Natpe_3462 | <a href="#">AGB33237</a> | signal transduction histidine kinase [Natr... | CDD | <a href="#">UniProt</a> | <a href="#">Pfam</a> | <a href="#">InterPro</a> |  |
| Natpe_3578 | <a href="#">AGB33346</a> | PAS domain S-box [Natrinema pellirubrum DS... | CDD | <a href="#">UniProt</a> | <a href="#">Pfam</a> | <a href="#">InterPro</a> |  |

|                 |                          |                                               |     |                         |                      |                          |
|-----------------|--------------------------|-----------------------------------------------|-----|-------------------------|----------------------|--------------------------|
| Natpe_3603      | <a href="#">AGB33370</a> | signal transduction histidine kinase [Natr... | CDD | <a href="#">UniProt</a> | <a href="#">Pfam</a> | <a href="#">InterPro</a> |
| <b>REC only</b> |                          |                                               |     |                         |                      |                          |
| Natpe_2663      | <a href="#">AGB32469</a> | response regulator containing CheY-like re... | CDD | <a href="#">UniProt</a> | <a href="#">Pfam</a> | <a href="#">InterPro</a> |
| Natpe_2623      | <a href="#">AGB32430</a> | response regulator with CheY-like receiver... | CDD | <a href="#">UniProt</a> | <a href="#">Pfam</a> | <a href="#">InterPro</a> |
| Natpe_2548      | <a href="#">AGB32359</a> | response regulator with CheY-like receiver... | CDD | <a href="#">UniProt</a> | <a href="#">Pfam</a> | <a href="#">InterPro</a> |
| Natpe_3756      | <a href="#">AGB33518</a> | response regulator with CheY-like receiver... | CDD | <a href="#">UniProt</a> | <a href="#">Pfam</a> | <a href="#">InterPro</a> |
| Natpe_3156      | <a href="#">AGB32948</a> | response regulator with CheY-like receiver... | CDD | <a href="#">UniProt</a> | <a href="#">Pfam</a> | <a href="#">InterPro</a> |
| Natpe_2129      | <a href="#">AGB31958</a> | response regulator with CheY-like receiver... | CDD | <a href="#">UniProt</a> | <a href="#">Pfam</a> | <a href="#">InterPro</a> |
| *Natpe_1740     | <a href="#">AGB31629</a> | hypothetical protein Natpe_1740 [Natrinema... | CDD | <a href="#">UniProt</a> | <a href="#">Pfam</a> | <a href="#">InterPro</a> |
| *Natpe_1744     | <a href="#">AGB31633</a> | response regulator with CheY-like receiver... | CDD | <a href="#">UniProt</a> | <a href="#">Pfam</a> | <a href="#">InterPro</a> |
| <b>REC-HisK</b> |                          |                                               |     |                         |                      |                          |
| Natpe_0289      | <a href="#">AGB30223</a> | PAS domain S-box [Natrinema pellirubrum DS... | CDD | <a href="#">UniProt</a> | <a href="#">Pfam</a> | <a href="#">InterPro</a> |
| Natpe_0512      | <a href="#">AGB30441</a> | PAS domain S-box [Natrinema pellirubrum DS... | CDD | <a href="#">UniProt</a> | <a href="#">Pfam</a> | <a href="#">InterPro</a> |
| Natpe_0611      | <a href="#">AGB30536</a> | PAS domain S-box [Natrinema pellirubrum DS... | CDD | <a href="#">UniProt</a> | <a href="#">Pfam</a> | <a href="#">InterPro</a> |
| Natpe_1750      | <a href="#">AGB31639</a> | PAS domain S-box [Natrinema pellirubrum DS... | CDD | <a href="#">UniProt</a> | <a href="#">Pfam</a> | <a href="#">InterPro</a> |
| Natpe_1893      | <a href="#">AGB31753</a> | PAS domain S-box [Natrinema pellirubrum DS... | CDD | <a href="#">UniProt</a> | <a href="#">Pfam</a> | <a href="#">InterPro</a> |
| Natpe_2599      | <a href="#">AGB32407</a> | PAS domain S-box [Natrinema pellirubrum DS... | CDD | <a href="#">UniProt</a> | <a href="#">Pfam</a> | <a href="#">InterPro</a> |
| Natpe_3144      | <a href="#">AGB32936</a> | PAS domain S-box [Natrinema pellirubrum DS... | CDD | <a href="#">UniProt</a> | <a href="#">Pfam</a> | <a href="#">InterPro</a> |
| <b>REC-CheB</b> |                          |                                               |     |                         |                      |                          |
| Natpe_2662      | <a href="#">AGB32468</a> | chemotaxis response regulator containing a... | CDD | <a href="#">UniProt</a> | <a href="#">Pfam</a> | <a href="#">InterPro</a> |
| <b>REC-HalX</b> |                          |                                               |     |                         |                      |                          |
| Natpe_1772      | <a href="#">AGB31661</a> | response regulator with CheY-like receiver... | CDD | <a href="#">UniProt</a> | <a href="#">Pfam</a> | <a href="#">InterPro</a> |
| Natpe_2391      | <a href="#">AGB32207</a> | response regulator with CheY-like receiver... | CDD | <a href="#">UniProt</a> | <a href="#">Pfam</a> | <a href="#">InterPro</a> |
| <b>BAT</b>      |                          |                                               |     |                         |                      |                          |
| Natpe_1071      | <a href="#">AGB30983</a> | PAS domain S-box [Natrinema pellirubrum DS... | CDD | <a href="#">UniProt</a> | <a href="#">Pfam</a> | <a href="#">InterPro</a> |
| Natpe_1885      | <a href="#">AGB31748</a> | PAS domain S-box [Natrinema pellirubrum DS... | CDD | <a href="#">UniProt</a> | <a href="#">Pfam</a> | <a href="#">InterPro</a> |
| Natpe_3155      | <a href="#">AGB32947</a> | putative DNA binding protein [Natrinema pe... | CDD | <a href="#">UniProt</a> | <a href="#">Pfam</a> | <a href="#">InterPro</a> |
| Natpe_3634      | <a href="#">AGB33399</a> | response regulator with CheY-like receiver... | CDD | <a href="#">UniProt</a> | <a href="#">Pfam</a> | <a href="#">InterPro</a> |

### Natrinema sp. J7-2

#### HisK, no REC

|           |                          |                                               |     |                         |                      |                          |
|-----------|--------------------------|-----------------------------------------------|-----|-------------------------|----------------------|--------------------------|
| NJ7G_0185 | <a href="#">AFO55440</a> | ATP-binding region ATPase domain protein [... | CDD | <a href="#">UniProt</a> | <a href="#">Pfam</a> | <a href="#">InterPro</a> |
| NJ7G_0557 | <a href="#">AFO55812</a> | PAS sensor protein [Natrinema sp. J7-2] ...   | CDD | <a href="#">UniProt</a> | <a href="#">Pfam</a> | <a href="#">InterPro</a> |
| NJ7G_1164 | <a href="#">AFO56411</a> | multi-sensor signal transduction histidine... | CDD | <a href="#">UniProt</a> | <a href="#">Pfam</a> | <a href="#">InterPro</a> |
| NJ7G_1393 | <a href="#">AFO56640</a> | PAS sensor protein [Natrinema sp. J7-2] ...   | CDD | <a href="#">UniProt</a> | <a href="#">Pfam</a> | <a href="#">InterPro</a> |
| NJ7G_2984 | <a href="#">AFO58206</a> | PAS sensor protein [Natrinema sp. J7-2] ...   | CDD | <a href="#">UniProt</a> | <a href="#">Pfam</a> | <a href="#">InterPro</a> |
| NJ7G_3067 | <a href="#">AFO58288</a> | PAS sensor protein [Natrinema sp. J7-2] ...   | CDD | <a href="#">UniProt</a> | <a href="#">Pfam</a> | <a href="#">InterPro</a> |
| NJ7G_3336 | <a href="#">AFO58554</a> | PAS sensor protein [Natrinema sp. J7-2] ...   | CDD | <a href="#">UniProt</a> | <a href="#">Pfam</a> | <a href="#">InterPro</a> |
| NJ7G_3488 | <a href="#">AFO58705</a> | putative signal-transducing histidine kina... | CDD | <a href="#">UniProt</a> | <a href="#">Pfam</a> | <a href="#">InterPro</a> |
| NJ7G_3528 | <a href="#">AFO58745</a> | ATP-binding region ATPase domain protein [... | CDD | <a href="#">UniProt</a> | <a href="#">Pfam</a> | <a href="#">InterPro</a> |
| NJ7G_3793 | <a href="#">AFO59010</a> | PAS sensor protein [Natrinema sp. J7-2] ...   | CDD | <a href="#">UniProt</a> | <a href="#">Pfam</a> | <a href="#">InterPro</a> |

#### REC only

|           |                          |                                               |     |                         |                      |                          |
|-----------|--------------------------|-----------------------------------------------|-----|-------------------------|----------------------|--------------------------|
| NJ7G_0324 | <a href="#">AFO55577</a> | response regulator receiver [Natrinema sp.... | CDD | <a href="#">UniProt</a> | <a href="#">Pfam</a> | <a href="#">InterPro</a> |
| NJ7G_0885 | <a href="#">AFO56134</a> | response regulator receiver [Natrinema sp.... | CDD | <a href="#">UniProt</a> | <a href="#">Pfam</a> | <a href="#">InterPro</a> |
| NJ7G_2773 | <a href="#">AFO58001</a> | PAS sensor protein [Natrinema sp. J7-2].....  | CDD | <a href="#">UniProt</a> | <a href="#">Pfam</a> | <a href="#">InterPro</a> |
| NJ7G_3370 | <a href="#">AFO58588</a> | response regulator receiver protein [Natri... | CDD | <a href="#">UniProt</a> | <a href="#">Pfam</a> | <a href="#">InterPro</a> |
| NJ7G_3530 | <a href="#">AFO58747</a> | response regulator receiver [Natrinema sp. .. | CDD | <a href="#">UniProt</a> | <a href="#">Pfam</a> | <a href="#">InterPro</a> |
| NJ7G_3972 | <a href="#">AFO59186</a> | response regulator receiver protein [Natri... | CDD | <a href="#">UniProt</a> | <a href="#">Pfam</a> | <a href="#">InterPro</a> |

#### REC-HisK

|           |                          |                                              |     |                         |                      |                          |
|-----------|--------------------------|----------------------------------------------|-----|-------------------------|----------------------|--------------------------|
| NJ7G_2462 | <a href="#">AFO57693</a> | PAS sensor protein [Natrinema sp. J7-2]..... | CDD | <a href="#">UniProt</a> | <a href="#">Pfam</a> | <a href="#">InterPro</a> |
| NJ7G_3303 | <a href="#">AFO58522</a> | PAS sensor protein [Natrinema sp. J7-2]..... | CDD | <a href="#">UniProt</a> | <a href="#">Pfam</a> | <a href="#">InterPro</a> |
| NJ7G_3963 | <a href="#">AFO59177</a> | PAS sensor protein [Natrinema sp. J7-2] ...  | CDD | <a href="#">UniProt</a> | <a href="#">Pfam</a> | <a href="#">InterPro</a> |

#### REC-CheB

|           |                          |                                                 |     |                         |                      |                          |
|-----------|--------------------------|-------------------------------------------------|-----|-------------------------|----------------------|--------------------------|
| NJ7G_3529 | <a href="#">AFO58746</a> | CheB methyltransferase [Natrinema sp. J7-2].... | CDD | <a href="#">UniProt</a> | <a href="#">Pfam</a> | <a href="#">InterPro</a> |
|-----------|--------------------------|-------------------------------------------------|-----|-------------------------|----------------------|--------------------------|

#### REC-HalX

|           |                          |                                               |     |                         |                      |                          |
|-----------|--------------------------|-----------------------------------------------|-----|-------------------------|----------------------|--------------------------|
| NJ7G_3068 | <a href="#">AFO58289</a> | response regulator receiver protein [Natri... | CDD | <a href="#">UniProt</a> | <a href="#">Pfam</a> | <a href="#">InterPro</a> |
| NJ7G_3487 | <a href="#">AFO58706</a> | HalX domain protein [Natrinema sp. J7-2]..... | CDD | <a href="#">UniProt</a> | <a href="#">Pfam</a> | <a href="#">InterPro</a> |

#### BAT

|           |                          |                                               |     |                         |                      |                          |
|-----------|--------------------------|-----------------------------------------------|-----|-------------------------|----------------------|--------------------------|
| NJ7G_0213 | <a href="#">AFO55468</a> | Bacterio-opsin activator HTH domain protei... | CDD | <a href="#">UniProt</a> | <a href="#">Pfam</a> | <a href="#">InterPro</a> |
| NJ7G_1601 | <a href="#">AFO56845</a> | PAS sensor protein [Natrinema sp. J7-2].....  | CDD | <a href="#">UniProt</a> | <a href="#">Pfam</a> | <a href="#">InterPro</a> |
| NJ7G_3971 | <a href="#">AFO59185</a> | Bacterio-opsin activator HTH domain protei... | CDD | <a href="#">UniProt</a> | <a href="#">Pfam</a> | <a href="#">InterPro</a> |

### Natronobacterium gregoryi SP2

#### HisK, no REC

|            |                          |                                               |     |                         |                      |                          |
|------------|--------------------------|-----------------------------------------------|-----|-------------------------|----------------------|--------------------------|
| Natgr_0515 | <a href="#">AFZ71768</a> | chemotaxis protein histidine kinase-like p... | CDD | <a href="#">UniProt</a> | <a href="#">Pfam</a> | <a href="#">InterPro</a> |
| Natgr_0560 | <a href="#">AFZ71810</a> | PAS domain S-box [Natronobacterium gregory... | CDD | <a href="#">UniProt</a> | <a href="#">Pfam</a> | <a href="#">InterPro</a> |
| Natgr_1954 | <a href="#">AFZ73137</a> | chemotaxis protein histidine kinase-like p... | CDD | <a href="#">UniProt</a> | <a href="#">Pfam</a> | <a href="#">InterPro</a> |
| Natgr_2193 | <a href="#">AFZ73371</a> | PAS domain S-box [Natronobacterium gregory... | CDD | <a href="#">UniProt</a> | <a href="#">Pfam</a> | <a href="#">InterPro</a> |
| Natgr_3215 | <a href="#">AFZ74345</a> | PAS domain S-box [Natronobacterium gregory... | CDD | <a href="#">UniProt</a> | <a href="#">Pfam</a> | <a href="#">InterPro</a> |
| Natgr_3236 | <a href="#">AFZ74365</a> | PAS domain S-box [Natronobacterium gregory... | CDD | <a href="#">UniProt</a> | <a href="#">Pfam</a> | <a href="#">InterPro</a> |

#### REC only

|            |                          |                                               |     |                         |                      |                          |
|------------|--------------------------|-----------------------------------------------|-----|-------------------------|----------------------|--------------------------|
| Natgr_0517 | <a href="#">AFZ71770</a> | response regulator containing CheY-like re... | CDD | <a href="#">UniProt</a> | <a href="#">Pfam</a> | <a href="#">InterPro</a> |
| Natgr_1049 | <a href="#">AFZ72279</a> | response regulator with CheY-like receiver... | CDD | <a href="#">UniProt</a> | <a href="#">Pfam</a> | <a href="#">InterPro</a> |
| Natgr_1953 | <a href="#">AFZ73136</a> | response regulator containing a CheY-like ... | CDD | <a href="#">UniProt</a> | <a href="#">Pfam</a> | <a href="#">InterPro</a> |
| Natgr_2829 | <a href="#">AFZ73973</a> | response regulator with CheY-like receiver... | CDD | <a href="#">UniProt</a> | <a href="#">Pfam</a> | <a href="#">InterPro</a> |
| Natgr_3286 | <a href="#">AFZ74411</a> | CheY-like receiver domain-containing prote... | CDD | <a href="#">UniProt</a> | <a href="#">Pfam</a> | <a href="#">InterPro</a> |
| Natgr_3323 | <a href="#">AFZ74448</a> | response regulator with CheY-like receiver... | CDD | <a href="#">UniProt</a> | <a href="#">Pfam</a> | <a href="#">InterPro</a> |

|                 |                          |                                               |                     |                         |                      |                          |            |
|-----------------|--------------------------|-----------------------------------------------|---------------------|-------------------------|----------------------|--------------------------|------------|
| <b>REC-HisK</b> |                          |                                               |                     |                         |                      |                          |            |
| Natgr_3398      | <a href="#">AFZ74518</a> | PAS domain S-box [Natronobacterium gregory... | <a href="#">CDD</a> | <a href="#">UniProt</a> | <a href="#">Pfam</a> | <a href="#">InterPro</a> |            |
| <b>REC-CheB</b> |                          |                                               |                     |                         |                      |                          |            |
| Natgr_1955      | <a href="#">AFZ73138</a> | chemotaxis response regulator containing a... | <a href="#">CDD</a> | <a href="#">UniProt</a> | <a href="#">Pfam</a> | <a href="#">InterPro</a> |            |
| Natgr_0516      | <a href="#">AFZ71769</a> | chemotaxis response regulator containing a... | <a href="#">CDD</a> | <a href="#">UniProt</a> | <a href="#">Pfam</a> | <a href="#">InterPro</a> |            |
| <b>REC-HalX</b> |                          |                                               |                     |                         |                      |                          |            |
| Natgr_3393      | <a href="#">AFZ74513</a> | response regulator with CheY-like receiver... | <a href="#">CDD</a> | <a href="#">UniProt</a> | <a href="#">Pfam</a> | <a href="#">InterPro</a> |            |
| <b>wHTH-REC</b> |                          |                                               |                     |                         |                      |                          |            |
| Natgr_2194      | <a href="#">AFZ73372</a> | response regulator with CheY-like receiver... | <a href="#">CDD</a> | <a href="#">UniProt</a> | <a href="#">Pfam</a> | <a href="#">InterPro</a> | (wHTH-REC) |
| <b>BAT</b>      |                          |                                               |                     |                         |                      |                          |            |
| Natgr_1050      | <a href="#">AFZ72280</a> | putative DNA binding protein [Natronobacte... | <a href="#">CDD</a> | <a href="#">UniProt</a> | <a href="#">Pfam</a> | <a href="#">InterPro</a> |            |
| Natgr_1657      | <a href="#">AFZ72856</a> | response regulator with CheY-like receiver... | <a href="#">CDD</a> | <a href="#">UniProt</a> | <a href="#">Pfam</a> | <a href="#">InterPro</a> |            |
| Natgr_3018      | <a href="#">AFZ74152</a> | PAS domain S-box [Natronobacterium gregory... | <a href="#">CDD</a> | <a href="#">UniProt</a> | <a href="#">Pfam</a> | <a href="#">InterPro</a> |            |
| Natgr_3339      | <a href="#">AFZ74463</a> | PAS domain S-box [Natronobacterium gregory... | <a href="#">CDD</a> | <a href="#">UniProt</a> | <a href="#">Pfam</a> | <a href="#">InterPro</a> |            |

### Natronococcus occultus SP4

|                     |                          |                                               |                     |                         |                      |                          |  |
|---------------------|--------------------------|-----------------------------------------------|---------------------|-------------------------|----------------------|--------------------------|--|
| <b>HisK, no REC</b> |                          |                                               |                     |                         |                      |                          |  |
| Natoc_0064          | <a href="#">AGB35946</a> | bacteriophytochrome (light-regulated signa... | <a href="#">CDD</a> | <a href="#">UniProt</a> | <a href="#">Pfam</a> | <a href="#">InterPro</a> |  |
| Natoc_0123          | <a href="#">AGB36004</a> | bacteriophytochrome (light-regulated signa... | <a href="#">CDD</a> | <a href="#">UniProt</a> | <a href="#">Pfam</a> | <a href="#">InterPro</a> |  |
| Natoc_0362          | <a href="#">AGB36227</a> | PAS domain S-box [Natronococcus occultus S... | <a href="#">CDD</a> | <a href="#">UniProt</a> | <a href="#">Pfam</a> | <a href="#">InterPro</a> |  |
| Natoc_0482          | <a href="#">AGB36345</a> | PAS domain S-box [Natronococcus occultus S... | <a href="#">CDD</a> | <a href="#">UniProt</a> | <a href="#">Pfam</a> | <a href="#">InterPro</a> |  |
| Natoc_0527          | <a href="#">AGB36389</a> | PAS domain S-box [Natronococcus occultus S... | <a href="#">CDD</a> | <a href="#">UniProt</a> | <a href="#">Pfam</a> | <a href="#">InterPro</a> |  |
| Natoc_0531          | <a href="#">AGB36393</a> | PAS domain S-box [Natronococcus occultus S... | <a href="#">CDD</a> | <a href="#">UniProt</a> | <a href="#">Pfam</a> | <a href="#">InterPro</a> |  |
| Natoc_0766          | <a href="#">AGB36623</a> | PAS/PAC sensor hybrid histidine kinase [Na... | <a href="#">CDD</a> | <a href="#">UniProt</a> | <a href="#">Pfam</a> | <a href="#">InterPro</a> |  |
| Natoc_1623          | <a href="#">AGB37428</a> | PAS domain S-box [Natronococcus occultus S... | <a href="#">CDD</a> | <a href="#">UniProt</a> | <a href="#">Pfam</a> | <a href="#">InterPro</a> |  |
| Natoc_2617          | <a href="#">AGB38379</a> | PAS domain S-box [Natronococcus occultus S... | <a href="#">CDD</a> | <a href="#">UniProt</a> | <a href="#">Pfam</a> | <a href="#">InterPro</a> |  |
| Natoc_2674          | <a href="#">AGB38436</a> | PAS domain S-box [Natronococcus occultus S... | <a href="#">CDD</a> | <a href="#">UniProt</a> | <a href="#">Pfam</a> | <a href="#">InterPro</a> |  |
| Natoc_2836          | <a href="#">AGB38595</a> | bacteriophytochrome (light-regulated signa... | <a href="#">CDD</a> | <a href="#">UniProt</a> | <a href="#">Pfam</a> | <a href="#">InterPro</a> |  |
| Natoc_2872          | <a href="#">AGB38630</a> | PAS domain S-box [Natronococcus occultus S... | <a href="#">CDD</a> | <a href="#">UniProt</a> | <a href="#">Pfam</a> | <a href="#">InterPro</a> |  |
| Natoc_3096          | <a href="#">AGB38839</a> | PAS domain S-box [Natronococcus occultus S... | <a href="#">CDD</a> | <a href="#">UniProt</a> | <a href="#">Pfam</a> | <a href="#">InterPro</a> |  |
| Natoc_3124          | <a href="#">AGB38865</a> | PAS/PAC sensor signal transduction histidi... | <a href="#">CDD</a> | <a href="#">UniProt</a> | <a href="#">Pfam</a> | <a href="#">InterPro</a> |  |
| Natoc_3181          | <a href="#">AGB38920</a> | bacteriophytochrome (light-regulated signa..  | <a href="#">CDD</a> | <a href="#">UniProt</a> | <a href="#">Pfam</a> | <a href="#">InterPro</a> |  |
| Natoc_3348          | <a href="#">AGB39081</a> | PAS domain S-box [Natronococcus occultus S... | <a href="#">CDD</a> | <a href="#">UniProt</a> | <a href="#">Pfam</a> | <a href="#">InterPro</a> |  |
| Natoc_3377          | <a href="#">AGB39109</a> | PAS domain S-box [Natronococcus occultus S... | <a href="#">CDD</a> | <a href="#">UniProt</a> | <a href="#">Pfam</a> | <a href="#">InterPro</a> |  |
| Natoc_3594          | <a href="#">AGB39312</a> | PAS domain S-box [Natronococcus occultus S... | <a href="#">CDD</a> | <a href="#">UniProt</a> | <a href="#">Pfam</a> | <a href="#">InterPro</a> |  |
| Natoc_3640          | <a href="#">AGB39356</a> | PAS domain S-box [Natronococcus occultus S... | <a href="#">CDD</a> | <a href="#">UniProt</a> | <a href="#">Pfam</a> | <a href="#">InterPro</a> |  |
| Natoc_3719          | <a href="#">AGB39434</a> | bacteriophytochrome (light-regulated signa..  | <a href="#">CDD</a> | <a href="#">UniProt</a> | <a href="#">Pfam</a> | <a href="#">InterPro</a> |  |
| Natoc_3789          | <a href="#">AGB39498</a> | PAS domain S-box [Natronococcus occultus S... | <a href="#">CDD</a> | <a href="#">UniProt</a> | <a href="#">Pfam</a> | <a href="#">InterPro</a> |  |
| Natoc_3920          | <a href="#">AGB39618</a> | signal transduction histidine kinase [Natr... | <a href="#">CDD</a> | <a href="#">UniProt</a> | <a href="#">Pfam</a> | <a href="#">InterPro</a> |  |
| Natoc_4317          | <a href="#">AGB40007</a> | PAS domain S-box (plasmid) [Natronococcus ... | <a href="#">CDD</a> | <a href="#">UniProt</a> | <a href="#">Pfam</a> | <a href="#">InterPro</a> |  |
| <b>REC only</b>     |                          |                                               |                     |                         |                      |                          |  |
| Natoc_0500          | <a href="#">AGB36362</a> | response regulator with CheY-like receiver... | <a href="#">CDD</a> | <a href="#">UniProt</a> | <a href="#">Pfam</a> | <a href="#">InterPro</a> |  |
| Natoc_0549          | <a href="#">AGB36411</a> | response regulator containing a CheY-like ... | <a href="#">CDD</a> | <a href="#">UniProt</a> | <a href="#">Pfam</a> | <a href="#">InterPro</a> |  |
| Natoc_1460          | <a href="#">AGB37271</a> | response regulator containing a CheY-like ... | <a href="#">CDD</a> | <a href="#">UniProt</a> | <a href="#">Pfam</a> | <a href="#">InterPro</a> |  |
| Natoc_1794          | <a href="#">AGB37592</a> | response regulator with CheY-like receiver... | <a href="#">CDD</a> | <a href="#">UniProt</a> | <a href="#">Pfam</a> | <a href="#">InterPro</a> |  |
| Natoc_1795          | <a href="#">AGB37593</a> | CheY-like receiver domain-containing prote... | <a href="#">CDD</a> | <a href="#">UniProt</a> | <a href="#">Pfam</a> | <a href="#">InterPro</a> |  |
| Natoc_2082          | <a href="#">AGB37868</a> | response regulator with CheY-like receiver... | <a href="#">CDD</a> | <a href="#">UniProt</a> | <a href="#">Pfam</a> | <a href="#">InterPro</a> |  |
| Natoc_2174          | <a href="#">AGB37956</a> | response regulator with CheY-like receiver... | <a href="#">CDD</a> | <a href="#">UniProt</a> | <a href="#">Pfam</a> | <a href="#">InterPro</a> |  |
| Natoc_2257          | <a href="#">AGB38035</a> | response regulator with CheY-like receiver... | <a href="#">CDD</a> | <a href="#">UniProt</a> | <a href="#">Pfam</a> | <a href="#">InterPro</a> |  |
| Natoc_2423          | <a href="#">AGB38198</a> | response regulator with CheY-like receiver... | <a href="#">CDD</a> | <a href="#">UniProt</a> | <a href="#">Pfam</a> | <a href="#">InterPro</a> |  |
| <b>REC-HisK</b>     |                          |                                               |                     |                         |                      |                          |  |
| Natoc_0486          | <a href="#">AGB36348</a> | PAS domain S-box [Natronococcus occultus S... | <a href="#">CDD</a> | <a href="#">UniProt</a> | <a href="#">Pfam</a> | <a href="#">InterPro</a> |  |
| Natoc_2955          | <a href="#">AGB38710</a> | PAS domain S-box [Natronococcus occultus S... | <a href="#">CDD</a> | <a href="#">UniProt</a> | <a href="#">Pfam</a> | <a href="#">InterPro</a> |  |
| <b>REC-HalX</b>     |                          |                                               |                     |                         |                      |                          |  |
| Natoc_1303          | <a href="#">AGB37125</a> | response regulator with CheY-like receiver... | <a href="#">CDD</a> | <a href="#">UniProt</a> | <a href="#">Pfam</a> | <a href="#">InterPro</a> |  |
| Natoc_1629          | <a href="#">AGB37434</a> | response regulator with CheY-like receiver... | <a href="#">CDD</a> | <a href="#">UniProt</a> | <a href="#">Pfam</a> | <a href="#">InterPro</a> |  |
| <b>BAT</b>          |                          |                                               |                     |                         |                      |                          |  |
| Natoc_0262          | <a href="#">AGB36137</a> | putative DNA binding protein [Natronococcu... | <a href="#">CDD</a> | <a href="#">UniProt</a> | <a href="#">Pfam</a> | <a href="#">InterPro</a> |  |
| Natoc_0501          | <a href="#">AGB36363</a> | putative DNA binding protein [Natronococcu... | <a href="#">CDD</a> | <a href="#">UniProt</a> | <a href="#">Pfam</a> | <a href="#">InterPro</a> |  |
| Natoc_1930          | <a href="#">AGB37720</a> | PAS domain S-box [Natronococcus occultus S... | <a href="#">CDD</a> | <a href="#">UniProt</a> | <a href="#">Pfam</a> | <a href="#">InterPro</a> |  |
| Natoc_3414          | <a href="#">AGB39146</a> | PAS domain S-box [Natronococcus occultus S... | <a href="#">CDD</a> | <a href="#">UniProt</a> | <a href="#">Pfam</a> | <a href="#">InterPro</a> |  |
| Natoc_4318          | <a href="#">AGB40008</a> | response regulator with CheY-like receiver... | <a href="#">CDD</a> | <a href="#">UniProt</a> | <a href="#">Pfam</a> | <a href="#">InterPro</a> |  |

### Natronomonas moolapensis 8.8.11

|                     |                          |                                               |                     |                         |                      |                          |  |
|---------------------|--------------------------|-----------------------------------------------|---------------------|-------------------------|----------------------|--------------------------|--|
| <b>HisK, no REC</b> |                          |                                               |                     |                         |                      |                          |  |
| Nmlp_1339           | <a href="#">CCQ35547</a> | histidine kinase [Natronomonas moolapensis... | <a href="#">CDD</a> | <a href="#">UniProt</a> | <a href="#">Pfam</a> | <a href="#">InterPro</a> |  |
| Nmlp_1567           | <a href="#">CCQ35766</a> | histidine kinase [Natronomonas moolapensis... | <a href="#">CDD</a> | <a href="#">UniProt</a> | <a href="#">Pfam</a> | <a href="#">InterPro</a> |  |
| Nmlp_1633           | <a href="#">CCQ35828</a> | sensor box histidine kinase [Natronomonas ... | <a href="#">CDD</a> | <a href="#">UniProt</a> | <a href="#">Pfam</a> | <a href="#">InterPro</a> |  |
| Nmlp_1636           | <a href="#">CCQ35831</a> | sensor box histidine kinase [Natronomonas ... | <a href="#">CDD</a> | <a href="#">UniProt</a> | <a href="#">Pfam</a> | <a href="#">InterPro</a> |  |
| Nmlp_1963           | <a href="#">CCQ36148</a> | sensor box histidine kinase [Natronomonas ... | <a href="#">CDD</a> | <a href="#">UniProt</a> | <a href="#">Pfam</a> | <a href="#">InterPro</a> |  |
| Nmlp_2197           | <a href="#">CCQ36372</a> | histidine kinase [Natronomonas moolapensis... | <a href="#">CDD</a> | <a href="#">UniProt</a> | <a href="#">Pfam</a> | <a href="#">InterPro</a> |  |
| Nmlp_2234           | <a href="#">CCQ36406</a> | sensor box histidine kinase [Natronomonas ... | <a href="#">CDD</a> | <a href="#">UniProt</a> | <a href="#">Pfam</a> | <a href="#">InterPro</a> |  |
| Nmlp_2331           | <a href="#">CCQ36499</a> | sensor box histidine kinase [Natronomonas ... | <a href="#">CDD</a> | <a href="#">UniProt</a> | <a href="#">Pfam</a> | <a href="#">InterPro</a> |  |
| Nmlp_2493           | <a href="#">CCQ36659</a> | sensor box histidine kinase [Natronomonas ... | <a href="#">CDD</a> | <a href="#">UniProt</a> | <a href="#">Pfam</a> | <a href="#">InterPro</a> |  |
| Nmlp_2654           | <a href="#">CCQ36810</a> | histidine kinase [Natronomonas moolapensis... | <a href="#">CDD</a> | <a href="#">UniProt</a> | <a href="#">Pfam</a> | <a href="#">InterPro</a> |  |
| Nmlp_2689           | <a href="#">CCQ36843</a> | taxis sensor histidine kinase CheA [Natron... | <a href="#">CDD</a> | <a href="#">UniProt</a> | <a href="#">Pfam</a> | <a href="#">InterPro</a> |  |

|                    |                          |                                               |     |                         |                      |                                     |
|--------------------|--------------------------|-----------------------------------------------|-----|-------------------------|----------------------|-------------------------------------|
| Nmlp_2838          | <a href="#">CCQ36988</a> | sensor box histidine kinase [Natronomonas ... | CDD | <a href="#">UniProt</a> | <a href="#">Pfam</a> | <a href="#">InterPro</a>            |
| Nmlp_2853          | <a href="#">CCQ37003</a> | sensor box histidine kinase [Natronomonas ... | CDD | <a href="#">UniProt</a> | <a href="#">Pfam</a> | <a href="#">InterPro</a>            |
| Nmlp_2854          | <a href="#">CCQ37004</a> | sensor box histidine kinase [Natronomonas ... | CDD | <a href="#">UniProt</a> | <a href="#">Pfam</a> | <a href="#">InterPro</a>            |
| Nmlp_2967          | <a href="#">CCQ37110</a> | sensor box histidine kinase [Natronomonas ... | CDD | <a href="#">UniProt</a> | <a href="#">Pfam</a> | <a href="#">InterPro</a>            |
| Nmlp_3040          | <a href="#">CCQ37183</a> | histidine kinase [Natronomonas moolapensis... | CDD | <a href="#">UniProt</a> | <a href="#">Pfam</a> | <a href="#">InterPro</a>            |
| Nmlp_3120          | <a href="#">CCQ37262</a> | histidine kinase [Natronomonas moolapensis... | CDD | <a href="#">UniProt</a> | <a href="#">Pfam</a> | <a href="#">InterPro</a>            |
| Nmlp_3273          | <a href="#">CCQ37407</a> | sensor box histidine kinase [Natronomonas ... | CDD | <a href="#">UniProt</a> | <a href="#">Pfam</a> | <a href="#">InterPro</a>            |
| Nmlp_3396          | <a href="#">CCQ37525</a> | sensor box histidine kinase [Natronomonas ... | CDD | <a href="#">UniProt</a> | <a href="#">Pfam</a> | <a href="#">InterPro</a>            |
| Nmlp_3414          | <a href="#">CCQ37542</a> | sensor box histidine kinase [Natronomonas ... | CDD | <a href="#">UniProt</a> | <a href="#">Pfam</a> | <a href="#">InterPro</a>            |
| Nmlp_3522          | <a href="#">CCQ37647</a> | sensor box histidine kinase [Natronomonas ... | CDD | <a href="#">UniProt</a> | <a href="#">Pfam</a> | <a href="#">InterPro</a>            |
| Nmlp_3744          | <a href="#">CCQ37858</a> | sensor box histidine kinase [Natronomonas ... | CDD | <a href="#">UniProt</a> | <a href="#">Pfam</a> | <a href="#">InterPro</a>            |
| Nmlp_3775          | <a href="#">CCQ37888</a> | histidine kinase [Natronomonas moolapensis... | CDD | <a href="#">UniProt</a> | <a href="#">Pfam</a> | <a href="#">InterPro</a>            |
| Nmlp_3825          | <a href="#">CCQ37937</a> | sensor box histidine kinase [Natronomonas ... | CDD | <a href="#">UniProt</a> | <a href="#">Pfam</a> | <a href="#">InterPro</a>            |
| <b>REC only</b>    |                          |                                               |     |                         |                      |                                     |
| Nmlp_3163          | <a href="#">CCQ37300</a> | receiver box response regulator [Natronomo... | CDD | <a href="#">UniProt</a> | <a href="#">Pfam</a> | <a href="#">InterPro</a>            |
| Nmlp_3199          | <a href="#">CCQ37336</a> | response regulator CheY [Natronomonas mool... | CDD | <a href="#">UniProt</a> | <a href="#">Pfam</a> | <a href="#">InterPro</a>            |
| Nmlp_3895          | <a href="#">CCQ38007</a> | response regulator CheY [Natronomonas mool... | CDD | <a href="#">UniProt</a> | <a href="#">Pfam</a> | <a href="#">InterPro</a>            |
| <b>REC-HisK</b>    |                          |                                               |     |                         |                      |                                     |
| Nmlp_1112          | <a href="#">CCQ35323</a> | receiver/sensor box histidine kinase [Natr... | CDD | <a href="#">UniProt</a> | <a href="#">Pfam</a> | <a href="#">InterPro</a>            |
| Nmlp_1632          | <a href="#">CCQ35827</a> | receiver/sensor box histidine kinase [Natr... | CDD | <a href="#">UniProt</a> | <a href="#">Pfam</a> | <a href="#">InterPro</a>            |
| Nmlp_2277          | <a href="#">CCQ36447</a> | receiver/sensor box histidine kinase [Natr... | CDD | <a href="#">UniProt</a> | <a href="#">Pfam</a> | <a href="#">InterPro</a>            |
| Nmlp_2278          | <a href="#">CCQ36448</a> | receiver box histidine kinase [Natronomona... | CDD | <a href="#">UniProt</a> | <a href="#">Pfam</a> | <a href="#">InterPro</a>            |
| Nmlp_2339          | <a href="#">CCQ36507</a> | receiver/sensor box histidine kinase [Natr... | CDD | <a href="#">UniProt</a> | <a href="#">Pfam</a> | <a href="#">InterPro</a>            |
| Nmlp_3142          | <a href="#">CCQ37280</a> | receiver/sensor box histidine kinase [Natr... | CDD | <a href="#">UniProt</a> | <a href="#">Pfam</a> | <a href="#">InterPro</a>            |
| Nmlp_3362          | <a href="#">CCQ37491</a> | receiver/sensor box histidine kinase [Natr... | CDD | <a href="#">UniProt</a> | <a href="#">Pfam</a> | <a href="#">InterPro</a>            |
| Nmlp_3385          | <a href="#">CCQ37514</a> | receiver/sensor box histidine kinase [Natr... | CDD | <a href="#">UniProt</a> | <a href="#">Pfam</a> | <a href="#">InterPro</a>            |
| Nmlp_3506          | <a href="#">CCQ37631</a> | receiver/sensor box histidine kinase [Natr... | CDD | <a href="#">UniProt</a> | <a href="#">Pfam</a> | <a href="#">InterPro</a>            |
| Nmlp_3933          | <a href="#">CCQ38044</a> | receiver/sensor box histidine kinase [Natr... | CDD | <a href="#">UniProt</a> | <a href="#">Pfam</a> | <a href="#">InterPro</a>            |
| <b>REC-CheB</b>    |                          |                                               |     |                         |                      |                                     |
| Nmlp_2688          | <a href="#">CCQ36842</a> | protein-glutamate methylesterase CheB [Nat... | CDD | <a href="#">UniProt</a> | <a href="#">Pfam</a> | <a href="#">InterPro</a>            |
| <b>REC-PAS\GAF</b> |                          |                                               |     |                         |                      |                                     |
| Nmlp_2008          | <a href="#">CCQ36192</a> | receiver box response regulator [Natronomo... | CDD | <a href="#">UniProt</a> | <a href="#">Pfam</a> | <a href="#">InterPro</a>            |
| Nmlp_3616          | <a href="#">CCQ37735</a> | receiver/sensor box protein [Natronomonas ... | CDD | <a href="#">UniProt</a> | <a href="#">Pfam</a> | <a href="#">InterPro</a>            |
| <b>REC-HalX</b>    |                          |                                               |     |                         |                      |                                     |
| Nmlp_1999          | <a href="#">CCQ36183</a> | receiver box response regulator [Natronomo... | CDD | <a href="#">UniProt</a> | <a href="#">Pfam</a> | <a href="#">InterPro</a>            |
| Nmlp_2965          | <a href="#">CCQ37108</a> | receiver box response regulator [Natronomo... | CDD | <a href="#">UniProt</a> | <a href="#">Pfam</a> | <a href="#">InterPro</a>            |
| Nmlp_3118          | <a href="#">CCQ37260</a> | receiver box response regulator [Natronomo... | CDD | <a href="#">UniProt</a> | <a href="#">Pfam</a> | <a href="#">InterPro</a>            |
| Nmlp_3223          | <a href="#">CCQ37360</a> | receiver box response regulator [Natronomo... | CDD | <a href="#">UniProt</a> | <a href="#">Pfam</a> | <a href="#">InterPro</a>            |
| <b>REC-wHTH</b>    |                          |                                               |     |                         |                      |                                     |
| Nmlp_3226          | <a href="#">CCQ37363</a> | receiver box response regulator [Natronomo... | CDD | <a href="#">UniProt</a> | <a href="#">Pfam</a> | <a href="#">InterPro</a> (REC-wHTH) |
| <b>BAT</b>         |                          |                                               |     |                         |                      |                                     |
| Nmlp_1294          | <a href="#">CCQ35503</a> | receiver/sensor/bat box HTH-10 family tran... | CDD | <a href="#">UniProt</a> | <a href="#">Pfam</a> | <a href="#">InterPro</a>            |
| Nmlp_1964          | <a href="#">CCQ36149</a> | receiver/sensor/bat box HTH-10 family tran... | CDD | <a href="#">UniProt</a> | <a href="#">Pfam</a> | <a href="#">InterPro</a>            |
| Nmlp_2653          | <a href="#">CCQ36809</a> | receiver/bat box HTH-10 family transcripti... | CDD | <a href="#">UniProt</a> | <a href="#">Pfam</a> | <a href="#">InterPro</a>            |
| Nmlp_2966          | <a href="#">CCQ37109</a> | receiver box HTH-10 family transcription r... | CDD | <a href="#">UniProt</a> | <a href="#">Pfam</a> | <a href="#">InterPro</a>            |
| <b>Other RRs</b>   |                          |                                               |     |                         |                      |                                     |
| Nmlp_2279          | <a href="#">CCQ36449</a> | receiver box response regulator [Natronomo... | CDD | <a href="#">UniProt</a> | <a href="#">Pfam</a> | <a href="#">InterPro</a> (CheF-REC) |

### Natronomonas pharaonis DSM 2160

#### HisK, no REC

|          |                          |                                               |     |                         |                      |                          |
|----------|--------------------------|-----------------------------------------------|-----|-------------------------|----------------------|--------------------------|
| NP_0142A | <a href="#">CAI48162</a> | histidine kinase [Natronomonas pharaonis D... | CDD | <a href="#">UniProt</a> | <a href="#">Pfam</a> | <a href="#">InterPro</a> |
| NP_0144A | <a href="#">CAI48163</a> | sensor box histidine kinase [Natronomonas ... | CDD | <a href="#">UniProt</a> | <a href="#">Pfam</a> | <a href="#">InterPro</a> |
| NP_0730A | <a href="#">CAI48456</a> | histidine kinase [Natronomonas pharaonis D... | CDD | <a href="#">UniProt</a> | <a href="#">Pfam</a> | <a href="#">InterPro</a> |
| NP_1154A | <a href="#">CAI48668</a> | sensor box histidine kinase [Natronomonas ... | CDD | <a href="#">UniProt</a> | <a href="#">Pfam</a> | <a href="#">InterPro</a> |
| NP_1622A | <a href="#">CAI48902</a> | sensor box histidine kinase [Natronomonas ... | CDD | <a href="#">UniProt</a> | <a href="#">Pfam</a> | <a href="#">InterPro</a> |
| NP_1640A | <a href="#">CAI48911</a> | sensor box histidine kinase [Natronomonas ... | CDD | <a href="#">UniProt</a> | <a href="#">Pfam</a> | <a href="#">InterPro</a> |
| NP_1804A | <a href="#">CAI48993</a> | sensor box histidine kinase [Natronomonas ... | CDD | <a href="#">UniProt</a> | <a href="#">Pfam</a> | <a href="#">InterPro</a> |
| NP_1850A | <a href="#">CAI49016</a> | sensor box histidine kinase [Natronomonas ... | CDD | <a href="#">UniProt</a> | <a href="#">Pfam</a> | <a href="#">InterPro</a> |
| NP_1882A | <a href="#">CAI49032</a> | sensor box histidine kinase [Natronomonas ... | CDD | <a href="#">UniProt</a> | <a href="#">Pfam</a> | <a href="#">InterPro</a> |
| NP_1912A | <a href="#">CAI49047</a> | sensor box histidine kinase [Natronomonas ... | CDD | <a href="#">UniProt</a> | <a href="#">Pfam</a> | <a href="#">InterPro</a> |
| NP_2172A | <a href="#">CAI49177</a> | taxis sensor histidine kinase CheA [Natr...   | CDD | <a href="#">UniProt</a> | <a href="#">Pfam</a> | <a href="#">InterPro</a> |
| NP_2516A | <a href="#">CAI49349</a> | sensor box histidine kinase [Natronomonas ... | CDD | <a href="#">UniProt</a> | <a href="#">Pfam</a> | <a href="#">InterPro</a> |
| NP_2742A | <a href="#">CAI49462</a> | receiver/sensor box histidine kinase [Natr... | CDD | <a href="#">UniProt</a> | <a href="#">Pfam</a> | <a href="#">InterPro</a> |
| NP_3356A | <a href="#">CAI49769</a> | sensor box histidine kinase [Natronomonas ... | CDD | <a href="#">UniProt</a> | <a href="#">Pfam</a> | <a href="#">InterPro</a> |
| NP_3536A | <a href="#">CAI49859</a> | sensor box histidine kinase [Natronomonas ... | CDD | <a href="#">UniProt</a> | <a href="#">Pfam</a> | <a href="#">InterPro</a> |
| NP_3752A | <a href="#">CAI49967</a> | sensor box histidine kinase [Natronomonas ... | CDD | <a href="#">UniProt</a> | <a href="#">Pfam</a> | <a href="#">InterPro</a> |
| NP_4606A | <a href="#">CAI50394</a> | sensor box histidine kinase [Natronomonas ... | CDD | <a href="#">UniProt</a> | <a href="#">Pfam</a> | <a href="#">InterPro</a> |
| NP_4696A | <a href="#">CAI50439</a> | sensor box histidine kinase [Natronomonas ... | CDD | <a href="#">UniProt</a> | <a href="#">Pfam</a> | <a href="#">InterPro</a> |
| NP_5274A | <a href="#">CAI50728</a> | sensor box histidine kinase [Natronomonas ... | CDD | <a href="#">UniProt</a> | <a href="#">Pfam</a> | <a href="#">InterPro</a> |
| NP_6064A | <a href="#">CAI50812</a> | sensor box histidine kinase (plasmid) [Nat... | CDD | <a href="#">UniProt</a> | <a href="#">Pfam</a> | <a href="#">InterPro</a> |
| NP_6080A | <a href="#">CAI50820</a> | sensor box histidine kinase (plasmid) [Nat... | CDD | <a href="#">UniProt</a> | <a href="#">Pfam</a> | <a href="#">InterPro</a> |
| NP_0090A | <a href="#">CAI48136</a> | sensor box histidine kinase [Natronomonas ... | CDD | <a href="#">UniProt</a> | <a href="#">Pfam</a> | <a href="#">InterPro</a> |
| NP_1506A | <a href="#">CAI48844</a> | sensor box histidine kinase [Natronomonas ... | CDD | <a href="#">UniProt</a> | <a href="#">Pfam</a> | <a href="#">InterPro</a> |
| NP_1914A | <a href="#">CAI49048</a> | sensor box histidine kinase [Natronomonas ... | CDD | <a href="#">UniProt</a> | <a href="#">Pfam</a> | <a href="#">InterPro</a> |

#### REC only

|         |                          |                                               |     |                         |                      |                          |
|---------|--------------------------|-----------------------------------------------|-----|-------------------------|----------------------|--------------------------|
| NP0140A | <a href="#">CAI48161</a> | receiver box response regulator [Natronomo... | CDD | <a href="#">UniProt</a> | <a href="#">Pfam</a> | <a href="#">InterPro</a> |
| NP0516A | <a href="#">CAI48349</a> | response regulator CheY [Natronomonas phar... | CDD | <a href="#">UniProt</a> | <a href="#">Pfam</a> | <a href="#">InterPro</a> |
| NP0682A | <a href="#">CAI48432</a> | receiver box response regulator [Natronomo... | CDD | <a href="#">UniProt</a> | <a href="#">Pfam</a> | <a href="#">InterPro</a> |

|                 |                          |                                               |     |                         |                      |                          |
|-----------------|--------------------------|-----------------------------------------------|-----|-------------------------|----------------------|--------------------------|
| NP2102A         | <a href="#">CAI49142</a> | response regulator CheY [Natronomonas phar... | CDD | <a href="#">UniProt</a> | <a href="#">Pfam</a> | <a href="#">InterPro</a> |
| <b>REC-HisK</b> |                          |                                               |     |                         |                      |                          |
| NP0138A         | <a href="#">CAI48160</a> | receiver/sensor box histidine kinase [Natr... | CDD | <a href="#">UniProt</a> | <a href="#">Pfam</a> | <a href="#">InterPro</a> |
| NP0188A         | <a href="#">CAI48185</a> | receiver/sensor box histidine kinase [Natr... | CDD | <a href="#">UniProt</a> | <a href="#">Pfam</a> | <a href="#">InterPro</a> |
| NP0622A         | <a href="#">CAI48402</a> | receiver/sensor box histidine kinase [Natr... | CDD | <a href="#">UniProt</a> | <a href="#">Pfam</a> | <a href="#">InterPro</a> |
| NP0626A         | <a href="#">CAI48404</a> | receiver/sensor box histidine kinase [Natr... | CDD | <a href="#">UniProt</a> | <a href="#">Pfam</a> | <a href="#">InterPro</a> |
| NP0862A         | <a href="#">CAI48522</a> | receiver/sensor box histidine kinase [Natr... | CDD | <a href="#">UniProt</a> | <a href="#">Pfam</a> | <a href="#">InterPro</a> |
| NP1912A         | <a href="#">CAI49047</a> | sensor box histidine kinase [Natronomonas ... | CDD | <a href="#">UniProt</a> | <a href="#">Pfam</a> | <a href="#">InterPro</a> |
| NP2656A         | <a href="#">CAI49419</a> | receiver/sensor box histidine kinase [Natr... | CDD | <a href="#">UniProt</a> | <a href="#">Pfam</a> | <a href="#">InterPro</a> |
| NP3458A         | <a href="#">CAI49820</a> | receiver box histidine kinase [Natronomona... | CDD | <a href="#">UniProt</a> | <a href="#">Pfam</a> | <a href="#">InterPro</a> |
| NP4696A         | <a href="#">CAI50439</a> | sensor box histidine kinase [Natronomonas ... | CDD | <a href="#">UniProt</a> | <a href="#">Pfam</a> | <a href="#">InterPro</a> |
| NP5120A         | <a href="#">CAI50651</a> | receiver/sensor box histidine kinase [Natr... | CDD | <a href="#">UniProt</a> | <a href="#">Pfam</a> | <a href="#">InterPro</a> |
| NP6028A         | <a href="#">CAI50794</a> | receiver/sensor box histidine kinase [Natr... | CDD | <a href="#">UniProt</a> | <a href="#">Pfam</a> | <a href="#">InterPro</a> |
| NP6202A         | <a href="#">CAI50881</a> | receiver/sensor box histidine kinase [Natr... | CDD | <a href="#">UniProt</a> | <a href="#">Pfam</a> | <a href="#">InterPro</a> |
| <b>REC-CheB</b> |                          |                                               |     |                         |                      |                          |
| NP2174A         | <a href="#">CAI49178</a> | protein-glutamate methylesterase CheB [Nat... | CDD | <a href="#">UniProt</a> | <a href="#">Pfam</a> | <a href="#">InterPro</a> |
| <b>REC-GAF</b>  |                          |                                               |     |                         |                      |                          |
| NP1846A         | <a href="#">CAI49014</a> | receiver box response regulator [Natronomo... | CDD | <a href="#">UniProt</a> | <a href="#">Pfam</a> | <a href="#">InterPro</a> |
| NP2716A         | <a href="#">CAI49449</a> | receiver box response regulator [Natronomo... | CDD | <a href="#">UniProt</a> | <a href="#">Pfam</a> | <a href="#">InterPro</a> |
| <b>REC-HalX</b> |                          |                                               |     |                         |                      |                          |
| NP0028A         | <a href="#">CAI48105</a> | receiver box response regulator [Natronomo... | CDD | <a href="#">UniProt</a> | <a href="#">Pfam</a> | <a href="#">InterPro</a> |
| NP2906A         | <a href="#">CAI49544</a> | receiver box response regulator [Natronomo... | CDD | <a href="#">UniProt</a> | <a href="#">Pfam</a> | <a href="#">InterPro</a> |
| <b>BAT</b>      |                          |                                               |     |                         |                      |                          |
| NP0654A         | <a href="#">CAI48418</a> | receiver/sensor/bat box HTH-10 family tran... | CDD | <a href="#">UniProt</a> | <a href="#">Pfam</a> | <a href="#">InterPro</a> |

#### [Palaeococcus pacificus DY20341](#)

|                     |                          |                                               |     |                         |                      |                          |
|---------------------|--------------------------|-----------------------------------------------|-----|-------------------------|----------------------|--------------------------|
| <b>HisK, no REC</b> |                          |                                               |     |                         |                      |                          |
| PAP_04520           | <a href="#">AIF69315</a> | hypothetical protein PAP_04520 [Palaeococc... | CDD | <a href="#">UniProt</a> | <a href="#">Pfam</a> | <a href="#">InterPro</a> |
| <b>REC only</b>     |                          |                                               |     |                         |                      |                          |
| PAP_04530           | <a href="#">AIF69317</a> | chemotaxis protein CheY [Palaeococcus paci... | CDD | <a href="#">UniProt</a> | <a href="#">Pfam</a> | <a href="#">InterPro</a> |
| <b>REC-CheB</b>     |                          |                                               |     |                         |                      |                          |
| PAP_04525           | <a href="#">AIF69316</a> | hypothetical protein PAP_04525 [Palaeococc... | CDD | <a href="#">UniProt</a> | <a href="#">Pfam</a> | <a href="#">InterPro</a> |

#### [Pyrococcus abyssi GE5](#)

|                     |                          |                                               |     |                         |                      |                          |
|---------------------|--------------------------|-----------------------------------------------|-----|-------------------------|----------------------|--------------------------|
| <b>HisK, no REC</b> |                          |                                               |     |                         |                      |                          |
| PAB1332             | <a href="#">CAB50458</a> | cheA chemotaxis histidine kinase [Pyrococc... | CDD | <a href="#">UniProt</a> | <a href="#">Pfam</a> | <a href="#">InterPro</a> |
| <b>REC only</b>     |                          |                                               |     |                         |                      |                          |
| PAB1330             | <a href="#">CAB50460</a> | cheY chemotaxis response regulator [Pyroco... | CDD | <a href="#">UniProt</a> | <a href="#">Pfam</a> | <a href="#">InterPro</a> |
| <b>REC-CheB</b>     |                          |                                               |     |                         |                      |                          |
| PAB1331             | <a href="#">CAB50459</a> | cheB protein-glutamate methylesterase [Pyr... | CDD | <a href="#">UniProt</a> | <a href="#">Pfam</a> | <a href="#">InterPro</a> |

#### [Pyrococcus horikoshii OT3](#)

|                     |                          |                                               |     |                         |                      |                          |
|---------------------|--------------------------|-----------------------------------------------|-----|-------------------------|----------------------|--------------------------|
| <b>HisK, no REC</b> |                          |                                               |     |                         |                      |                          |
| PH0484              | <a href="#">BAA29572</a> | 766aa long hypothetical histidine kinase ...  | CDD | <a href="#">UniProt</a> | <a href="#">Pfam</a> | <a href="#">InterPro</a> |
| <b>REC only</b>     |                          |                                               |     |                         |                      |                          |
| PH0482              | <a href="#">BAA29570</a> | 120aa long hypothetical chemotaxis protein... | CDD | <a href="#">UniProt</a> | <a href="#">Pfam</a> | <a href="#">InterPro</a> |
| <b>REC-CheB</b>     |                          |                                               |     |                         |                      |                          |
| PH0483              | <a href="#">BAA29571</a> | 368aa long hypothetical protein-glutamate ... | CDD | <a href="#">UniProt</a> | <a href="#">Pfam</a> | <a href="#">InterPro</a> |

#### [Pyrococcus kukulkanii](#)

|                     |                          |                                               |     |                         |                      |                          |
|---------------------|--------------------------|-----------------------------------------------|-----|-------------------------|----------------------|--------------------------|
| <b>HisK, no REC</b> |                          |                                               |     |                         |                      |                          |
| TQ32_01480          | <a href="#">AMM53314</a> | histidine kinase [Pyrococcus kukulkanii] ...  | CDD | <a href="#">UniProt</a> | <a href="#">Pfam</a> | <a href="#">InterPro</a> |
| <b>REC only</b>     |                          |                                               |     |                         |                      |                          |
| TQ32_01470          | <a href="#">AMM53312</a> | chemotaxis protein CheY [Pyrococcus kukulk... | CDD | <a href="#">UniProt</a> | <a href="#">Pfam</a> | <a href="#">InterPro</a> |
| <b>REC-CheB</b>     |                          |                                               |     |                         |                      |                          |
| TQ32_01475          | <a href="#">AMM53313</a> | chemotaxis protein CheY [Pyrococcus kukulk... | CDD | <a href="#">UniProt</a> | <a href="#">Pfam</a> | <a href="#">InterPro</a> |

#### [Pyrococcus sp. NA2](#)

|                     |                          |                                               |     |                         |                      |                          |
|---------------------|--------------------------|-----------------------------------------------|-----|-------------------------|----------------------|--------------------------|
| <b>HisK, no REC</b> |                          |                                               |     |                         |                      |                          |
| PNA2_1134           | <a href="#">AEC52050</a> | histidine kinase (cheA) [Pyrococcus sp. NA... | CDD | <a href="#">UniProt</a> | <a href="#">Pfam</a> | <a href="#">InterPro</a> |
| <b>REC only</b>     |                          |                                               |     |                         |                      |                          |
| PNA2_1132           | <a href="#">AEC52048</a> | chemotaxis response regulator [Pyrococcus ... | CDD | <a href="#">UniProt</a> | <a href="#">Pfam</a> | <a href="#">InterPro</a> |
| <b>REC-CheB</b>     |                          |                                               |     |                         |                      |                          |
| PNA2_1133           | <a href="#">AEC52049</a> | chemotaxis-specific methylesterase [Pyroco... | CDD | <a href="#">UniProt</a> | <a href="#">Pfam</a> | <a href="#">InterPro</a> |

#### [Pyrococcus sp. ST04](#)

|                     |                          |                                               |     |                         |                      |                          |
|---------------------|--------------------------|-----------------------------------------------|-----|-------------------------|----------------------|--------------------------|
| <b>HisK, no REC</b> |                          |                                               |     |                         |                      |                          |
| Py04_0537           | <a href="#">AFK22139</a> | chemotaxis histidine kinase [Pyrococcus sp... | CDD | <a href="#">UniProt</a> | <a href="#">Pfam</a> | <a href="#">InterPro</a> |
| <b>REC only</b>     |                          |                                               |     |                         |                      |                          |
| Py04_0535           | <a href="#">AFK22137</a> | chemotaxis response regulator [Pyrococcus ... | CDD | <a href="#">UniProt</a> | <a href="#">Pfam</a> | <a href="#">InterPro</a> |
| <b>REC-CheB</b>     |                          |                                               |     |                         |                      |                          |
| Py04_0536           | <a href="#">AFK22138</a> | chemotaxis-specific methylesterase [Pyroco... | CDD | <a href="#">UniProt</a> | <a href="#">Pfam</a> | <a href="#">InterPro</a> |

### Pyrococcus yayanosii CHI

#### HisK, no REC

|                 |                          |                                               |                     |                         |                      |                          |
|-----------------|--------------------------|-----------------------------------------------|---------------------|-------------------------|----------------------|--------------------------|
| PYCH_15450      | <a href="#">AEH25211</a> | chemotaxis histidine kinase [Pyrococcus ya... | <a href="#">CDD</a> | <a href="#">UniProt</a> | <a href="#">Pfam</a> | <a href="#">InterPro</a> |
| <b>REC only</b> |                          |                                               |                     |                         |                      |                          |
| PYCH_15430      | <a href="#">AEH25209</a> | chemotaxis response regulator [Pyrococcus ... | <a href="#">CDD</a> | <a href="#">UniProt</a> | <a href="#">Pfam</a> | <a href="#">InterPro</a> |
| <b>REC-CheB</b> |                          |                                               |                     |                         |                      |                          |
| PYCH_15440      | <a href="#">AEH25210</a> | chemotaxis-specific methylesterase [Pyroco... | <a href="#">CDD</a> | <a href="#">UniProt</a> | <a href="#">Pfam</a> | <a href="#">InterPro</a> |

---

### Salinarchaeum sp. Harcht-Bsk1

#### HisK, no REC

|            |                          |                                               |                     |                         |                      |                          |
|------------|--------------------------|-----------------------------------------------|---------------------|-------------------------|----------------------|--------------------------|
| L593_00155 | <a href="#">AGM99985</a> | signal-transducing histidine kinase [Salin... | <a href="#">CDD</a> | <a href="#">UniProt</a> | <a href="#">Pfam</a> | <a href="#">InterPro</a> |
| L593_00245 | <a href="#">AGN00004</a> | chemotaxis protein CheA [Salinarchaeum sp.... | <a href="#">CDD</a> | <a href="#">UniProt</a> | <a href="#">Pfam</a> | <a href="#">InterPro</a> |
| L593_00745 | <a href="#">AGN00104</a> | PAS domain S-box [Salinarchaeum sp. Harcht... | <a href="#">CDD</a> | <a href="#">UniProt</a> | <a href="#">Pfam</a> | <a href="#">InterPro</a> |
| L593_01540 | <a href="#">AGN00261</a> | PAS/PAC sensor signal transduction histidi... | <a href="#">CDD</a> | <a href="#">UniProt</a> | <a href="#">Pfam</a> | <a href="#">InterPro</a> |
| L593_02555 | <a href="#">AGN00462</a> | histidine kinase [Salinarchaeum sp. Harcht... | <a href="#">CDD</a> | <a href="#">UniProt</a> | <a href="#">Pfam</a> | <a href="#">InterPro</a> |
| L593_02640 | <a href="#">AGN00479</a> | CheA signal transduction histidine kinase ... | <a href="#">CDD</a> | <a href="#">UniProt</a> | <a href="#">Pfam</a> | <a href="#">InterPro</a> |
| L593_03370 | <a href="#">AGN00625</a> | HTR-like protein [Salinarchaeum sp. Harcht... | <a href="#">CDD</a> | <a href="#">UniProt</a> | <a href="#">Pfam</a> | <a href="#">InterPro</a> |
| L593_03635 | <a href="#">AGN00678</a> | PAS/PAC sensor signal transduction histidi... | <a href="#">CDD</a> | <a href="#">UniProt</a> | <a href="#">Pfam</a> | <a href="#">InterPro</a> |
| L593_03980 | <a href="#">AGN00747</a> | signal-transducing histidine kinase [Salin... | <a href="#">CDD</a> | <a href="#">UniProt</a> | <a href="#">Pfam</a> | <a href="#">InterPro</a> |
| L593_04445 | <a href="#">AGN00840</a> | PAS/PAC sensor hybrid histidine kinase [Sa... | <a href="#">CDD</a> | <a href="#">UniProt</a> | <a href="#">Pfam</a> | <a href="#">InterPro</a> |
| L593_04515 | <a href="#">AGN00854</a> | histidine kinase [Salinarchaeum sp. Harcht... | <a href="#">CDD</a> | <a href="#">UniProt</a> | <a href="#">Pfam</a> | <a href="#">InterPro</a> |
| L593_04535 | <a href="#">AGN00858</a> | HTR-like protein [Salinarchaeum sp. Harcht... | <a href="#">CDD</a> | <a href="#">UniProt</a> | <a href="#">Pfam</a> | <a href="#">InterPro</a> |
| L593_04770 | <a href="#">AGN00903</a> | PAS/PAC sensor signal transduction histidi... | <a href="#">CDD</a> | <a href="#">UniProt</a> | <a href="#">Pfam</a> | <a href="#">InterPro</a> |
| L593_06165 | <a href="#">AGN01182</a> | redox sensing protein [Salinarchaeum sp. H... | <a href="#">CDD</a> | <a href="#">UniProt</a> | <a href="#">Pfam</a> | <a href="#">InterPro</a> |
| L593_08965 | <a href="#">AGN01738</a> | signal-transducing histidine kinase [Salin... | <a href="#">CDD</a> | <a href="#">UniProt</a> | <a href="#">Pfam</a> | <a href="#">InterPro</a> |
| L593_09630 | <a href="#">AGN01871</a> | GAF sensor signal transduction histidine k... | <a href="#">CDD</a> | <a href="#">UniProt</a> | <a href="#">Pfam</a> | <a href="#">InterPro</a> |
| L593_10955 | <a href="#">AGN02136</a> | PAS domain-containing protein [Salinarchae... | <a href="#">CDD</a> | <a href="#">UniProt</a> | <a href="#">Pfam</a> | <a href="#">InterPro</a> |
| L593_11925 | <a href="#">AGN02328</a> | light- and oxygen-sensing transcription re... | <a href="#">CDD</a> | <a href="#">UniProt</a> | <a href="#">Pfam</a> | <a href="#">InterPro</a> |
| L593_12315 | <a href="#">AGN02402</a> | histidine kinase [Salinarchaeum sp. Harcht... | <a href="#">CDD</a> | <a href="#">UniProt</a> | <a href="#">Pfam</a> | <a href="#">InterPro</a> |
| L593_13520 | <a href="#">AGN02643</a> | pas domain s-box [Salinarchaeum sp. Harcht... | <a href="#">CDD</a> | <a href="#">UniProt</a> | <a href="#">Pfam</a> | <a href="#">InterPro</a> |
| L593_14460 | <a href="#">AGN02831</a> | PAS domain S-box [Salinarchaeum sp. Harcht... | <a href="#">CDD</a> | <a href="#">UniProt</a> | <a href="#">Pfam</a> | <a href="#">InterPro</a> |
| L593_14480 | <a href="#">AGN02835</a> | PAS sensor protein [Salinarchaeum sp. Harc... | <a href="#">CDD</a> | <a href="#">UniProt</a> | <a href="#">Pfam</a> | <a href="#">InterPro</a> |
| L593_14520 | <a href="#">AGN02843</a> | putative signal-transducing histidine kina... | <a href="#">CDD</a> | <a href="#">UniProt</a> | <a href="#">Pfam</a> | <a href="#">InterPro</a> |

#### REC only

|            |                          |                                               |                     |                         |                      |                          |
|------------|--------------------------|-----------------------------------------------|---------------------|-------------------------|----------------------|--------------------------|
| L593_02335 | <a href="#">AGN00418</a> | response regulator containing chey-like re... | <a href="#">CDD</a> | <a href="#">UniProt</a> | <a href="#">Pfam</a> | <a href="#">InterPro</a> |
| L593_00255 | <a href="#">AGN00006</a> | response regulator containing CheY-like re... | <a href="#">CDD</a> | <a href="#">UniProt</a> | <a href="#">Pfam</a> | <a href="#">InterPro</a> |

#### REC-HisK

|            |                          |                                               |                     |                         |                      |                          |
|------------|--------------------------|-----------------------------------------------|---------------------|-------------------------|----------------------|--------------------------|
| L593_04230 | <a href="#">AGN00797</a> | multi-sensor signal transduction histidine... | <a href="#">CDD</a> | <a href="#">UniProt</a> | <a href="#">Pfam</a> | <a href="#">InterPro</a> |
| L593_05180 | <a href="#">AGN00985</a> | PAS/PAC sensor signal transduction histidi... | <a href="#">CDD</a> | <a href="#">UniProt</a> | <a href="#">Pfam</a> | <a href="#">InterPro</a> |
| L593_06385 | <a href="#">AGN01224</a> | Htr-like protein [Salinarchaeum sp. Harcht... | <a href="#">CDD</a> | <a href="#">UniProt</a> | <a href="#">Pfam</a> | <a href="#">InterPro</a> |
| L593_07045 | <a href="#">AGN01356</a> | sensor box histidine kinase [Salinarchaeum... | <a href="#">CDD</a> | <a href="#">UniProt</a> | <a href="#">Pfam</a> | <a href="#">InterPro</a> |
| L593_07370 | <a href="#">AGN01419</a> | histidine kinase [Salinarchaeum sp. Harcht... | <a href="#">CDD</a> | <a href="#">UniProt</a> | <a href="#">Pfam</a> | <a href="#">InterPro</a> |
| L593_10790 | <a href="#">AGN02103</a> | PAS/PAC sensor signal transduction histidi... | <a href="#">CDD</a> | <a href="#">UniProt</a> | <a href="#">Pfam</a> | <a href="#">InterPro</a> |
| L593_11575 | <a href="#">AGN02258</a> | HTR-like protein [Salinarchaeum sp. Harcht... | <a href="#">CDD</a> | <a href="#">UniProt</a> | <a href="#">Pfam</a> | <a href="#">InterPro</a> |
| L593_12465 | <a href="#">AGN02432</a> | PAS domain S-box [Salinarchaeum sp. Harcht... | <a href="#">CDD</a> | <a href="#">UniProt</a> | <a href="#">Pfam</a> | <a href="#">InterPro</a> |
| L593_14735 | <a href="#">AGN02881</a> | PAS/PAC sensor signal transduction histidi... | <a href="#">CDD</a> | <a href="#">UniProt</a> | <a href="#">Pfam</a> | <a href="#">InterPro</a> |

#### REC-CheB

|             |                          |                                               |                     |                         |                      |                          |
|-------------|--------------------------|-----------------------------------------------|---------------------|-------------------------|----------------------|--------------------------|
| L593_00250  | <a href="#">AGN00005</a> | chemotaxis-specific methylesterase [Salina... | <a href="#">CDD</a> | <a href="#">UniProt</a> | <a href="#">Pfam</a> | <a href="#">InterPro</a> |
| *L593_02645 | <a href="#">AGN00480</a> | chemotaxis-specific methylesterase [Salina... | <a href="#">CDD</a> | <a href="#">UniProt</a> | <a href="#">Pfam</a> | <a href="#">InterPro</a> |

#### REC-PAS

|            |                          |                                               |                     |                         |                      |                          |
|------------|--------------------------|-----------------------------------------------|---------------------|-------------------------|----------------------|--------------------------|
| L593_03645 | <a href="#">AGN00680</a> | HTR-like protein [Salinarchaeum sp. Harcht... | <a href="#">CDD</a> | <a href="#">UniProt</a> | <a href="#">Pfam</a> | <a href="#">InterPro</a> |
|------------|--------------------------|-----------------------------------------------|---------------------|-------------------------|----------------------|--------------------------|

#### REC-HalX

|            |                          |                                               |                     |                         |                      |                          |
|------------|--------------------------|-----------------------------------------------|---------------------|-------------------------|----------------------|--------------------------|
| L593_04530 | <a href="#">AGN00857</a> | response regulator receiver protein [Salin... | <a href="#">CDD</a> | <a href="#">UniProt</a> | <a href="#">Pfam</a> | <a href="#">InterPro</a> |
| L593_06565 | <a href="#">AGN01260</a> | response regulator with CheY-like receiver... | <a href="#">CDD</a> | <a href="#">UniProt</a> | <a href="#">Pfam</a> | <a href="#">InterPro</a> |
| L593_11525 | <a href="#">AGN02248</a> | response regulator with CheY-like receiver... | <a href="#">CDD</a> | <a href="#">UniProt</a> | <a href="#">Pfam</a> | <a href="#">InterPro</a> |
| L593_14935 | <a href="#">AGN02921</a> | HalX domain protein [Salinarchaeum sp. Har... | <a href="#">CDD</a> | <a href="#">UniProt</a> | <a href="#">Pfam</a> | <a href="#">InterPro</a> |

#### Other RRs

|            |                          |                                               |                     |                         |                      |                                       |
|------------|--------------------------|-----------------------------------------------|---------------------|-------------------------|----------------------|---------------------------------------|
| L593_02140 | <a href="#">AGN00379</a> | response regulator receiver protein [Salin... | <a href="#">CDD</a> | <a href="#">UniProt</a> | <a href="#">Pfam</a> | <a href="#">InterPro</a> (REC-HalOD2) |
|------------|--------------------------|-----------------------------------------------|---------------------|-------------------------|----------------------|---------------------------------------|

---

### Thermococcus barophilus

#### HisK, no REC

|                 |                          |                                             |                     |                         |                      |                          |
|-----------------|--------------------------|---------------------------------------------|---------------------|-------------------------|----------------------|--------------------------|
| TBCH5v1_1428    | <a href="#">ALM75345</a> | chemotaxis histidine kinase [Thermococcu... | <a href="#">CDD</a> | <a href="#">UniProt</a> | <a href="#">Pfam</a> | <a href="#">InterPro</a> |
| <b>REC only</b> |                          |                                             |                     |                         |                      |                          |
| TBCH5v1_1430    | <a href="#">ALM75347</a> | Chemotaxis protein CheY [Thermococcus ba... | <a href="#">CDD</a> | <a href="#">UniProt</a> | <a href="#">Pfam</a> | <a href="#">InterPro</a> |
| <b>REC-CheB</b> |                          |                                             |                     |                         |                      |                          |
| TBCH5v1_1429    | <a href="#">ALM75346</a> | Chemotaxis response regulator protein-gl... | <a href="#">CDD</a> | <a href="#">UniProt</a> | <a href="#">Pfam</a> | <a href="#">InterPro</a> |

---

### Thermococcus eurythermalis

#### HisK, no REC

|                 |                          |                                               |                     |                         |                      |                          |
|-----------------|--------------------------|-----------------------------------------------|---------------------|-------------------------|----------------------|--------------------------|
| TEU_11690       | <a href="#">AIU70934</a> | histidine kinase [Thermococcus eurythermal... | <a href="#">CDD</a> | <a href="#">UniProt</a> | <a href="#">Pfam</a> | <a href="#">InterPro</a> |
| <b>REC only</b> |                          |                                               |                     |                         |                      |                          |
| TEU_11680       | <a href="#">AIU70932</a> | chemotaxis protein CheY [Thermococcus eury... | <a href="#">CDD</a> | <a href="#">UniProt</a> | <a href="#">Pfam</a> | <a href="#">InterPro</a> |
| <b>REC-CheB</b> |                          |                                               |                     |                         |                      |                          |
| TEU_11685       | <a href="#">AIU70933</a> | chemotaxis protein CheY [Thermococcus eury... | <a href="#">CDD</a> | <a href="#">UniProt</a> | <a href="#">Pfam</a> | <a href="#">InterPro</a> |

---

### [Thermococcus gammatolerans EJ3](#)

HisK, no REC

|                 |                          |                                               |                     |                         |                      |                          |
|-----------------|--------------------------|-----------------------------------------------|---------------------|-------------------------|----------------------|--------------------------|
| TGAM_1529       | <a href="#">ACS34031</a> | Chemotaxis histidine kinase (cheA) [Thermo... | <a href="#">CDD</a> | <a href="#">UniProt</a> | <a href="#">Pfam</a> | <a href="#">InterPro</a> |
| <b>REC only</b> |                          |                                               |                     |                         |                      |                          |
| TGAM_1530       | <a href="#">ACS34032</a> | Chemotaxis response regulator (cheY) [Ther... | <a href="#">CDD</a> | <a href="#">UniProt</a> | <a href="#">Pfam</a> | <a href="#">InterPro</a> |

---

### [Thermococcus guaymasensis DSM 11113](#)

HisK, no REC

|                 |                          |                                               |                     |                         |                      |                          |
|-----------------|--------------------------|-----------------------------------------------|---------------------|-------------------------|----------------------|--------------------------|
| X802_00465      | <a href="#">AJC70836</a> | histidine kinase [Thermococcus guaymasensi... | <a href="#">CDD</a> | <a href="#">UniProt</a> | <a href="#">Pfam</a> | <a href="#">InterPro</a> |
| <b>REC only</b> |                          |                                               |                     |                         |                      |                          |
| X802_00470      | <a href="#">AJC70837</a> | chemotaxis protein CheY [Thermococcus guay... | <a href="#">CDD</a> | <a href="#">UniProt</a> | <a href="#">Pfam</a> | <a href="#">InterPro</a> |

---

### [Thermococcus kodakarensis KOD1](#)

HisK, no REC

|                 |                          |                                               |                     |                         |                      |                          |
|-----------------|--------------------------|-----------------------------------------------|---------------------|-------------------------|----------------------|--------------------------|
| TK0635          | <a href="#">BAD84824</a> | chemotaxis histidine kinase, flame shift [... | <a href="#">CDD</a> | <a href="#">UniProt</a> | <a href="#">Pfam</a> | <a href="#">InterPro</a> |
| <b>REC only</b> |                          |                                               |                     |                         |                      |                          |
| TK0632          | <a href="#">BAD84821</a> | chemotaxis response regulator [Thermococcu... | <a href="#">CDD</a> | <a href="#">UniProt</a> | <a href="#">Pfam</a> | <a href="#">InterPro</a> |
| <b>REC-CheB</b> |                          |                                               |                     |                         |                      |                          |
| TK0633          | <a href="#">BAD84822</a> | chemotaxis protein-glutamate methylestera...  | <a href="#">CDD</a> | <a href="#">UniProt</a> | <a href="#">Pfam</a> | <a href="#">InterPro</a> |

---

### [Thermococcus litoralis DSM 5473](#)

HisK, no REC

|                 |                          |                                               |                     |                         |                      |                          |
|-----------------|--------------------------|-----------------------------------------------|---------------------|-------------------------|----------------------|--------------------------|
| OCC_10424       | <a href="#">EHR77516</a> | cheA chemotaxis histidine kinase [Thermoco... | <a href="#">CDD</a> | <a href="#">UniProt</a> | <a href="#">Pfam</a> | <a href="#">InterPro</a> |
| <b>REC only</b> |                          |                                               |                     |                         |                      |                          |
| OCC_10414       | <a href="#">EHR77514</a> | chemotaxis response regulator [Thermococcu... | <a href="#">CDD</a> | <a href="#">UniProt</a> | <a href="#">Pfam</a> | <a href="#">InterPro</a> |
| <b>REC-CheB</b> |                          |                                               |                     |                         |                      |                          |
| OCC_10419       | <a href="#">EHR77515</a> | chemotaxis-specific methylesterase [Thermo... | <a href="#">CDD</a> | <a href="#">UniProt</a> | <a href="#">Pfam</a> | <a href="#">InterPro</a> |

---

### [Thermococcus nautili](#)

HisK, no REC

|                 |                          |                                               |                     |                         |                      |                          |
|-----------------|--------------------------|-----------------------------------------------|---------------------|-------------------------|----------------------|--------------------------|
| BD01_1162       | <a href="#">AHL22779</a> | Chemotaxis protein histidine kinase-relate... | <a href="#">CDD</a> | <a href="#">UniProt</a> | <a href="#">Pfam</a> | <a href="#">InterPro</a> |
| <b>REC only</b> |                          |                                               |                     |                         |                      |                          |
| BD01_1160       | <a href="#">AHL22777</a> | CheY-like receiver [Thermococcus nautili] ... | <a href="#">CDD</a> | <a href="#">UniProt</a> | <a href="#">Pfam</a> | <a href="#">InterPro</a> |
| <b>REC-CheB</b> |                          |                                               |                     |                         |                      |                          |
| BD01_1161       | <a href="#">AHL22778</a> | Chemotaxis response regulator containing a... | <a href="#">CDD</a> | <a href="#">UniProt</a> | <a href="#">Pfam</a> | <a href="#">InterPro</a> |

---

### [Thermococcus onnurineus NA1](#)

HisK, no REC

|                 |                          |                                               |                     |                         |                      |                          |
|-----------------|--------------------------|-----------------------------------------------|---------------------|-------------------------|----------------------|--------------------------|
| TON_1198        | <a href="#">ACJ16686</a> | cheA chemotaxis histidine kinase [Thermoco... | <a href="#">CDD</a> | <a href="#">UniProt</a> | <a href="#">Pfam</a> | <a href="#">InterPro</a> |
| <b>REC only</b> |                          |                                               |                     |                         |                      |                          |
| TON_1196        | <a href="#">ACJ16684</a> | chemotaxis response regulator [Thermococcu... | <a href="#">CDD</a> | <a href="#">UniProt</a> | <a href="#">Pfam</a> | <a href="#">InterPro</a> |
| <b>REC-CheB</b> |                          |                                               |                     |                         |                      |                          |
| TON_1197        | <a href="#">ACJ16685</a> | cheB protein-glutamate methylesterase [The... | <a href="#">CDD</a> | <a href="#">UniProt</a> | <a href="#">Pfam</a> | <a href="#">InterPro</a> |

---

### [Thermococcus sp. AM4](#)

HisK, no REC

|                 |                          |                                               |                     |                         |                      |                          |
|-----------------|--------------------------|-----------------------------------------------|---------------------|-------------------------|----------------------|--------------------------|
| TAM4_1755       | <a href="#">EEB74388</a> | Signal transduction histidine kinase CheA ... | <a href="#">CDD</a> | <a href="#">UniProt</a> | <a href="#">Pfam</a> | <a href="#">InterPro</a> |
| <b>REC only</b> |                          |                                               |                     |                         |                      |                          |
| TAM4_1512       | <a href="#">EEB74145</a> | chemotaxis response regulator protein-glut... | <a href="#">CDD</a> | <a href="#">UniProt</a> | <a href="#">Pfam</a> | <a href="#">InterPro</a> |

---

### [Thermococcus peptonophilus JCM 9653](#)

HisK, no REC

|                 |                          |                                              |                     |                         |                      |                          |
|-----------------|--------------------------|----------------------------------------------|---------------------|-------------------------|----------------------|--------------------------|
| A0127_00765     | <a href="#">AMQ17807</a> | chemotaxis rotein CheA [Thermococcus pept... | <a href="#">CDD</a> | <a href="#">UniProt</a> | <a href="#">Pfam</a> | <a href="#">InterPro</a> |
| <b>REC only</b> |                          |                                              |                     |                         |                      |                          |
| A0127_00755     | <a href="#">AMQ17805</a> | two-component system response regulator [... | <a href="#">CDD</a> | <a href="#">UniProt</a> | <a href="#">Pfam</a> | <a href="#">InterPro</a> |
| <b>REC-CheB</b> |                          |                                              |                     |                         |                      |                          |
| A0127_00760     | <a href="#">AMQ17806</a> | chemotaxis response regulator protein-glu... | <a href="#">CDD</a> | <a href="#">UniProt</a> | <a href="#">Pfam</a> | <a href="#">InterPro</a> |

---

### [Thermoplasmatales archaeon BRNA1](#)

Other RRs

|            |                          |                                               |                     |                         |                      |                                       |
|------------|--------------------------|-----------------------------------------------|---------------------|-------------------------|----------------------|---------------------------------------|
| TALC_00527 | <a href="#">AGI47527</a> | Response regulator containing CheY-like re... | <a href="#">CDD</a> | <a href="#">UniProt</a> | <a href="#">Pfam</a> | <a href="#">InterPro</a> (REC-DUF835) |
|------------|--------------------------|-----------------------------------------------|---------------------|-------------------------|----------------------|---------------------------------------|

---

### [unclassified Euryarchaeota](#)

#### [uncultured marine group II euryarchaeote](#)

**REC only**

|          |                          |                                               |                     |                         |                      |                          |
|----------|--------------------------|-----------------------------------------------|---------------------|-------------------------|----------------------|--------------------------|
| MG2_0491 | <a href="#">EHR76079</a> | putative acetoacetate metabolism regulator... | <a href="#">CDD</a> | <a href="#">UniProt</a> | <a href="#">Pfam</a> | <a href="#">InterPro</a> |
|----------|--------------------------|-----------------------------------------------|---------------------|-------------------------|----------------------|--------------------------|

**Other RRs**

|          |                          |                                               |                     |                         |                      |                                           |
|----------|--------------------------|-----------------------------------------------|---------------------|-------------------------|----------------------|-------------------------------------------|
| MG2_0171 | <a href="#">EHR75759</a> | putative Signal transduction response regu... | <a href="#">CDD</a> | <a href="#">UniProt</a> | <a href="#">Pfam</a> | <a href="#">InterPro</a> (low complexity) |
|----------|--------------------------|-----------------------------------------------|---------------------|-------------------------|----------------------|-------------------------------------------|

MG2\_0555 [EHR76143](#) putative CheY-like superfamily protein wit... [CDD](#) [UniProt](#) [Pfam](#) [InterPro](#) (no archaeal hits)

### Thaumarchaeota

#### Candidatus Nitrocosmicus oleophilus strain MY3

##### **HisK, no REC**

|             |                          |                                               |                     |                         |                      |                          |
|-------------|--------------------------|-----------------------------------------------|---------------------|-------------------------|----------------------|--------------------------|
| NMY3_00019  | <a href="#">ALI34233</a> | Sensor protein SrrB [Candidatus Nitrocosmi... | <a href="#">CDD</a> | <a href="#">UniProt</a> | <a href="#">Pfam</a> | <a href="#">InterPro</a> |
| NMY3_00141  | <a href="#">ALI34355</a> | Sensory/regulatory protein RpfC [Candidatu... | <a href="#">CDD</a> | <a href="#">UniProt</a> | <a href="#">Pfam</a> | <a href="#">InterPro</a> |
| NMY3_00302  | <a href="#">ALI34516</a> | Sensor histidine kinase TodS [Candidatus N... | <a href="#">CDD</a> | <a href="#">UniProt</a> | <a href="#">Pfam</a> | <a href="#">InterPro</a> |
| NMY3_00671  | <a href="#">ALI34880</a> | Sensor protein kinase WalK [Candidatus Nit... | <a href="#">CDD</a> | <a href="#">UniProt</a> | <a href="#">Pfam</a> | <a href="#">InterPro</a> |
| NMY3_00763  | <a href="#">ALI34972</a> | Sensory/regulatory protein RpfC [Candidatu... | <a href="#">CDD</a> | <a href="#">UniProt</a> | <a href="#">Pfam</a> | <a href="#">InterPro</a> |
| NMY3_00767  | <a href="#">ALI34976</a> | Sensor protein DivL [Candidatus Nitrocosmi... | <a href="#">CDD</a> | <a href="#">UniProt</a> | <a href="#">Pfam</a> | <a href="#">InterPro</a> |
| NMY3_00923  | <a href="#">ALI35130</a> | Signal transduction histidine-protein kina... | <a href="#">CDD</a> | <a href="#">UniProt</a> | <a href="#">Pfam</a> | <a href="#">InterPro</a> |
| NMY3_01369  | <a href="#">ALI35573</a> | Sensor protein SrrB [Candidatus Nitrocosmi... | <a href="#">CDD</a> | <a href="#">UniProt</a> | <a href="#">Pfam</a> | <a href="#">InterPro</a> |
| NMY3_01566  | <a href="#">ALI35769</a> | Phytochrome-like protein cph1 [Candidatus ... | <a href="#">CDD</a> | <a href="#">UniProt</a> | <a href="#">Pfam</a> | <a href="#">InterPro</a> |
| NMY3_01835  | <a href="#">ALI36038</a> | Non-motile and phage-resistance protein [C... | <a href="#">CDD</a> | <a href="#">UniProt</a> | <a href="#">Pfam</a> | <a href="#">InterPro</a> |
| NMY3_02176  | <a href="#">ALI36376</a> | Sensor protein SrrB [Candidatus Nitrocosmi... | <a href="#">CDD</a> | <a href="#">UniProt</a> | <a href="#">Pfam</a> | <a href="#">InterPro</a> |
| NMY3_02759  | <a href="#">ALI36949</a> | Non-motile and phage-resistance protein [C... | <a href="#">CDD</a> | <a href="#">UniProt</a> | <a href="#">Pfam</a> | <a href="#">InterPro</a> |
| NMY3_02849  | <a href="#">ALI37038</a> | Alkaline phosphatase synthesis sensor prot... | <a href="#">CDD</a> | <a href="#">UniProt</a> | <a href="#">Pfam</a> | <a href="#">InterPro</a> |
| NMY3_02960  | <a href="#">ALI37147</a> | Sensor protein SrrB [Candidatus Nitrocosmi... | <a href="#">CDD</a> | <a href="#">UniProt</a> | <a href="#">Pfam</a> | <a href="#">InterPro</a> |
| NMY3_02973  | <a href="#">ALI37160</a> | Alkaline phosphatase synthesis sensor prot... | <a href="#">CDD</a> | <a href="#">UniProt</a> | <a href="#">Pfam</a> | <a href="#">InterPro</a> |
| NMY3_02978  | <a href="#">ALI37165</a> | Sensor histidine kinase YycG [Candidatus N... | <a href="#">CDD</a> | <a href="#">UniProt</a> | <a href="#">Pfam</a> | <a href="#">InterPro</a> |
| NMY3_03253  | <a href="#">ALI37438</a> | Alkaline phosphatase synthesis sensor prot... | <a href="#">CDD</a> | <a href="#">UniProt</a> | <a href="#">Pfam</a> | <a href="#">InterPro</a> |
| NMY3_03423  | <a href="#">ALI37606</a> | Alkaline phosphatase synthesis sensor prot... | <a href="#">CDD</a> | <a href="#">UniProt</a> | <a href="#">Pfam</a> | <a href="#">InterPro</a> |
| NMY3_03614  | <a href="#">ALI37796</a> | Alkaline phosphatase synthesis sensor prot... | <a href="#">CDD</a> | <a href="#">UniProt</a> | <a href="#">Pfam</a> | <a href="#">InterPro</a> |
| NMY3_03758  | <a href="#">ALI37939</a> | Non-motile and phage-resistance protein [C... | <a href="#">CDD</a> | <a href="#">UniProt</a> | <a href="#">Pfam</a> | <a href="#">InterPro</a> |
| *NMY3_01774 | <a href="#">ALI35977</a> | Virulence sensor protein BvgS precursor [C... | <a href="#">CDD</a> | <a href="#">UniProt</a> | <a href="#">Pfam</a> | <a href="#">InterPro</a> |
| NMY3_01775  | <a href="#">ALI35978</a> | Sensor protein FixL [Candidatus Nitrocosmi... | <a href="#">CDD</a> | <a href="#">UniProt</a> | <a href="#">Pfam</a> | <a href="#">InterPro</a> |

##### **Hybrid HisK**

|            |                          |                                               |                     |                         |                      |                          |
|------------|--------------------------|-----------------------------------------------|---------------------|-------------------------|----------------------|--------------------------|
| NMY3_00894 | <a href="#">ALI35103</a> | Aerobic respiration control sensor protein... | <a href="#">CDD</a> | <a href="#">UniProt</a> | <a href="#">Pfam</a> | <a href="#">InterPro</a> |
|------------|--------------------------|-----------------------------------------------|---------------------|-------------------------|----------------------|--------------------------|

##### **REC only**

|            |                          |                                               |                     |                         |                      |                          |
|------------|--------------------------|-----------------------------------------------|---------------------|-------------------------|----------------------|--------------------------|
| NMY3_00001 | <a href="#">ALI34215</a> | Response regulator SaeR [Candidatus Nitroc... | <a href="#">CDD</a> | <a href="#">UniProt</a> | <a href="#">Pfam</a> | <a href="#">InterPro</a> |
| NMY3_00010 | <a href="#">ALI34224</a> | C4-dicarboxylate transport transcriptional... | <a href="#">CDD</a> | <a href="#">UniProt</a> | <a href="#">Pfam</a> | <a href="#">InterPro</a> |
| NMY3_00095 | <a href="#">ALI34309</a> | Blue-light-activated protein [Candidatus N... | <a href="#">CDD</a> | <a href="#">UniProt</a> | <a href="#">Pfam</a> | <a href="#">InterPro</a> |
| NMY3_00311 | <a href="#">ALI34525</a> | Alkaline phosphatase synthesis transcripti... | <a href="#">CDD</a> | <a href="#">UniProt</a> | <a href="#">Pfam</a> | <a href="#">InterPro</a> |
| NMY3_00699 | <a href="#">ALI34908</a> | hypothetical protein NMY3_00699 [Candidatu... | <a href="#">CDD</a> | <a href="#">UniProt</a> | <a href="#">Pfam</a> | <a href="#">InterPro</a> |
| NMY3_00764 | <a href="#">ALI34973</a> | Response regulator MprA [Candidatus Nitroc... | <a href="#">CDD</a> | <a href="#">UniProt</a> | <a href="#">Pfam</a> | <a href="#">InterPro</a> |
| NMY3_00922 | <a href="#">ALI35129</a> | Response regulator ArlR [Candidatus Nitroc... | <a href="#">CDD</a> | <a href="#">UniProt</a> | <a href="#">Pfam</a> | <a href="#">InterPro</a> |
| NMY3_01534 | <a href="#">ALI35737</a> | Alkaline phosphatase synthesis transcripti... | <a href="#">CDD</a> | <a href="#">UniProt</a> | <a href="#">Pfam</a> | <a href="#">InterPro</a> |
| NMY3_01702 | <a href="#">ALI35905</a> | Sporulation initiation phosphotransferase ... | <a href="#">CDD</a> | <a href="#">UniProt</a> | <a href="#">Pfam</a> | <a href="#">InterPro</a> |
| NMY3_01845 | <a href="#">ALI36048</a> | Response regulator receiver domain protein... | <a href="#">CDD</a> | <a href="#">UniProt</a> | <a href="#">Pfam</a> | <a href="#">InterPro</a> |
| NMY3_02193 | <a href="#">ALI36393</a> | Sensory transduction protein regX3 [Candid... | <a href="#">CDD</a> | <a href="#">UniProt</a> | <a href="#">Pfam</a> | <a href="#">InterPro</a> |
| NMY3_02760 | <a href="#">ALI36950</a> | DNA-binding response regulator MtrA [Candi... | <a href="#">CDD</a> | <a href="#">UniProt</a> | <a href="#">Pfam</a> | <a href="#">InterPro</a> |
| NMY3_02970 | <a href="#">ALI37157</a> | Sensor histidine kinase RcsC [Candidatus N... | <a href="#">CDD</a> | <a href="#">UniProt</a> | <a href="#">Pfam</a> | <a href="#">InterPro</a> |
| NMY3_03013 | <a href="#">ALI37200</a> | C4-dicarboxylate transport transcriptional... | <a href="#">CDD</a> | <a href="#">UniProt</a> | <a href="#">Pfam</a> | <a href="#">InterPro</a> |
| NMY3_03255 | <a href="#">ALI37440</a> | Transcriptional regulatory protein ZraR [C... | <a href="#">CDD</a> | <a href="#">UniProt</a> | <a href="#">Pfam</a> | <a href="#">InterPro</a> |
| NMY3_03566 | <a href="#">ALI37748</a> | Chemotaxis protein CheY [Candidatus Nitroc... | <a href="#">CDD</a> | <a href="#">UniProt</a> | <a href="#">Pfam</a> | <a href="#">InterPro</a> |

##### **ACyc-REC**

|            |                          |                                               |                     |                         |                      |                          |
|------------|--------------------------|-----------------------------------------------|---------------------|-------------------------|----------------------|--------------------------|
| NMY3_00724 | <a href="#">ALI34933</a> | C4-dicarboxylate transport transcriptional... | <a href="#">CDD</a> | <a href="#">UniProt</a> | <a href="#">Pfam</a> | <a href="#">InterPro</a> |
| NMY3_00765 | <a href="#">ALI34974</a> | Transcriptional regulatory protein ZraR [C... | <a href="#">CDD</a> | <a href="#">UniProt</a> | <a href="#">Pfam</a> | <a href="#">InterPro</a> |
| NMY3_00775 | <a href="#">ALI34984</a> | C4-dicarboxylate transport transcriptional... | <a href="#">CDD</a> | <a href="#">UniProt</a> | <a href="#">Pfam</a> | <a href="#">InterPro</a> |
| NMY3_03427 | <a href="#">ALI37610</a> | Transcriptional regulatory protein CssR [C... | <a href="#">CDD</a> | <a href="#">UniProt</a> | <a href="#">Pfam</a> | <a href="#">InterPro</a> |

##### **REC-NTPase**

|            |                          |                                               |                     |                         |                      |                          |
|------------|--------------------------|-----------------------------------------------|---------------------|-------------------------|----------------------|--------------------------|
| NMY3_02059 | <a href="#">ALI36260</a> | hypothetical protein NMY3_02059 [Candidatu... | <a href="#">CDD</a> | <a href="#">UniProt</a> | <a href="#">Pfam</a> | <a href="#">InterPro</a> |
|------------|--------------------------|-----------------------------------------------|---------------------|-------------------------|----------------------|--------------------------|

##### **Other RRs**

|            |                          |                                               |                     |                         |                      |                                             |
|------------|--------------------------|-----------------------------------------------|---------------------|-------------------------|----------------------|---------------------------------------------|
| NMY3_00895 | <a href="#">ALI35104</a> | Response regulator receiver domain protein... | <a href="#">CDD</a> | <a href="#">UniProt</a> | <a href="#">Pfam</a> | <a href="#">InterPro</a> (no archaeal hits) |
| NMY3_01832 | <a href="#">ALI36035</a> | Cell cycle response regulator CtrA [Candid... | <a href="#">CDD</a> | <a href="#">UniProt</a> | <a href="#">Pfam</a> | <a href="#">InterPro</a> (no archaeal hits) |
| NMY3_03599 | <a href="#">ALI37781</a> | Response regulator receiver domain protein... | <a href="#">CDD</a> | <a href="#">UniProt</a> | <a href="#">Pfam</a> | <a href="#">InterPro</a> (no archaeal hits) |

#### Candidatus Nitrosoarchaeum limnia SFB1

##### **HisK, no REC**

|           |                          |                                               |                     |                         |                      |                          |
|-----------|--------------------------|-----------------------------------------------|---------------------|-------------------------|----------------------|--------------------------|
| Nlim_0130 | <a href="#">EGG42944</a> | Signal transduction histidine kinase [Cand... | <a href="#">CDD</a> | <a href="#">UniProt</a> | <a href="#">Pfam</a> | <a href="#">InterPro</a> |
| Nlim_0172 | <a href="#">EGG42942</a> | Signal transduction histidine kinase [Cand... | <a href="#">CDD</a> | <a href="#">UniProt</a> | <a href="#">Pfam</a> | <a href="#">InterPro</a> |
| Nlim_0457 | <a href="#">EGG42645</a> | Signal transduction histidine kinase [Cand... | <a href="#">CDD</a> | <a href="#">UniProt</a> | <a href="#">Pfam</a> | <a href="#">InterPro</a> |
| Nlim_0468 | <a href="#">EGG42656</a> | Signal transduction histidine kinase [Cand... | <a href="#">CDD</a> | <a href="#">UniProt</a> | <a href="#">Pfam</a> | <a href="#">InterPro</a> |
| Nlim_0477 | <a href="#">EGG42665</a> | Chemotaxis protein histidine kinase [Candi... | <a href="#">CDD</a> | <a href="#">UniProt</a> | <a href="#">Pfam</a> | <a href="#">InterPro</a> |
| Nlim_0502 | <a href="#">EGG42617</a> | Signal transduction histidine kinase [Cand... | <a href="#">CDD</a> | <a href="#">UniProt</a> | <a href="#">Pfam</a> | <a href="#">InterPro</a> |
| Nlim_0503 | <a href="#">EGG42618</a> | Signal transduction histidine kinase [Cand... | <a href="#">CDD</a> | <a href="#">UniProt</a> | <a href="#">Pfam</a> | <a href="#">InterPro</a> |
| Nlim_0706 | <a href="#">EGG42525</a> | Signal transduction histidine kinase [Cand... | <a href="#">CDD</a> | <a href="#">UniProt</a> | <a href="#">Pfam</a> | <a href="#">InterPro</a> |
| Nlim_0741 | <a href="#">EGG42560</a> | Signal transduction histidine kinase [Cand... | <a href="#">CDD</a> | <a href="#">UniProt</a> | <a href="#">Pfam</a> | <a href="#">InterPro</a> |
| Nlim_1060 | <a href="#">EGG42045</a> | Signal transduction histidine kinase [Cand... | <a href="#">CDD</a> | <a href="#">UniProt</a> | <a href="#">Pfam</a> | <a href="#">InterPro</a> |
| Nlim_1130 | <a href="#">EGG42005</a> | histidine kinase [Candidatus Nitrosoarchae... | <a href="#">CDD</a> | <a href="#">UniProt</a> | <a href="#">Pfam</a> | <a href="#">InterPro</a> |



|                  |                          |                                               |                     |                         |                      |                                            |
|------------------|--------------------------|-----------------------------------------------|---------------------|-------------------------|----------------------|--------------------------------------------|
| Nlim_1227        | <a href="#">EGG41993</a> | Signal transduction histidine kinase [Cand... | <a href="#">CDD</a> | <a href="#">UniProt</a> | <a href="#">Pfam</a> | <a href="#">InterPro</a>                   |
| Nlim_1312        | <a href="#">EGG41788</a> | histidine kinase [Candidatus Nitrosoarchae... | <a href="#">CDD</a> | <a href="#">UniProt</a> | <a href="#">Pfam</a> | <a href="#">InterPro</a>                   |
| Nlim_1675        | <a href="#">EGG41515</a> | Signal transduction histidine kinase [Cand... | <a href="#">CDD</a> | <a href="#">UniProt</a> | <a href="#">Pfam</a> | <a href="#">InterPro</a>                   |
| Nlim_1676        | <a href="#">EGG41516</a> | Signal transduction histidine kinase [Cand... | <a href="#">CDD</a> | <a href="#">UniProt</a> | <a href="#">Pfam</a> | <a href="#">InterPro</a>                   |
| Nlim_1743        | <a href="#">EGG41451</a> | histidine kinase [Candidatus Nitrosoarchae... | <a href="#">CDD</a> | <a href="#">UniProt</a> | <a href="#">Pfam</a> | <a href="#">InterPro</a>                   |
| <b>REC only</b>  |                          |                                               |                     |                         |                      |                                            |
| Nlim_0096        | <a href="#">EGG43046</a> | CheY-like receiver [Candidatus Nitrosoarch... | <a href="#">CDD</a> | <a href="#">UniProt</a> | <a href="#">Pfam</a> | <a href="#">InterPro</a>                   |
| Nlim_0228        | <a href="#">EGG42918</a> | response regulator receiver protein [Candi... | <a href="#">CDD</a> | <a href="#">UniProt</a> | <a href="#">Pfam</a> | <a href="#">InterPro</a>                   |
| Nlim_0417        | <a href="#">EGG42704</a> | CheY-like receiver [Candidatus Nitrosoarch... | <a href="#">CDD</a> | <a href="#">UniProt</a> | <a href="#">Pfam</a> | <a href="#">InterPro</a>                   |
| Nlim_0466        | <a href="#">EGG42654</a> | CheY-like receiver [Candidatus Nitrosoarch... | <a href="#">CDD</a> | <a href="#">UniProt</a> | <a href="#">Pfam</a> | <a href="#">InterPro</a>                   |
| Nlim_0467        | <a href="#">EGG42655</a> | CheY-like receiver [Candidatus Nitrosoarch... | <a href="#">CDD</a> | <a href="#">UniProt</a> | <a href="#">Pfam</a> | <a href="#">InterPro</a>                   |
| Nlim_0469        | <a href="#">EGG42657</a> | CheY-like receiver [Candidatus Nitrosoarch... | <a href="#">CDD</a> | <a href="#">UniProt</a> | <a href="#">Pfam</a> | <a href="#">InterPro</a>                   |
| Nlim_0472        | <a href="#">EGG42660</a> | CheY-like receiver [Candidatus Nitrosoarch... | <a href="#">CDD</a> | <a href="#">UniProt</a> | <a href="#">Pfam</a> | <a href="#">InterPro</a>                   |
| Nlim_0499        | <a href="#">EGG42614</a> | CheY-like receiver [Candidatus Nitrosoarch... | <a href="#">CDD</a> | <a href="#">UniProt</a> | <a href="#">Pfam</a> | <a href="#">InterPro</a>                   |
| Nlim_0739        | <a href="#">EGG42558</a> | CheY-like receiver [Candidatus Nitrosoarch... | <a href="#">CDD</a> | <a href="#">UniProt</a> | <a href="#">Pfam</a> | <a href="#">InterPro</a>                   |
| Nlim_0779        | <a href="#">EGG42334</a> | CheY-like receiver [Candidatus Nitrosoarch... | <a href="#">CDD</a> | <a href="#">UniProt</a> | <a href="#">Pfam</a> | <a href="#">InterPro</a>                   |
| Nlim_0780        | <a href="#">EGG42335</a> | CheY-like receiver [Candidatus Nitrosoarch... | <a href="#">CDD</a> | <a href="#">UniProt</a> | <a href="#">Pfam</a> | <a href="#">InterPro</a>                   |
| Nlim_0781        | <a href="#">EGG42336</a> | CheY-like receiver [Candidatus Nitrosoarch... | <a href="#">CDD</a> | <a href="#">UniProt</a> | <a href="#">Pfam</a> | <a href="#">InterPro</a>                   |
| Nlim_0783        | <a href="#">EGG42338</a> | CheY-like receiver [Candidatus Nitrosoarch... | <a href="#">CDD</a> | <a href="#">UniProt</a> | <a href="#">Pfam</a> | <a href="#">InterPro</a>                   |
| Nlim_0784        | <a href="#">EGG42339</a> | CheY-like receiver [Candidatus Nitrosoarch... | <a href="#">CDD</a> | <a href="#">UniProt</a> | <a href="#">Pfam</a> | <a href="#">InterPro</a>                   |
| Nlim_0785        | <a href="#">EGG42340</a> | response regulator receiver protein [Candi... | <a href="#">CDD</a> | <a href="#">UniProt</a> | <a href="#">Pfam</a> | <a href="#">InterPro</a>                   |
| Nlim_0839        | <a href="#">EGG42193</a> | Hypothetical protein Nlim_0839 [Candidatus... | <a href="#">CDD</a> | <a href="#">UniProt</a> | <a href="#">Pfam</a> | <a href="#">InterPro</a>                   |
| Nlim_0841        | <a href="#">EGG42195</a> | CheY-like receiver [Candidatus Nitrosoarch... | <a href="#">CDD</a> | <a href="#">UniProt</a> | <a href="#">Pfam</a> | <a href="#">InterPro</a>                   |
| Nlim_0842        | <a href="#">EGG42196</a> | CheY-like receiver [Candidatus Nitrosoarch... | <a href="#">CDD</a> | <a href="#">UniProt</a> | <a href="#">Pfam</a> | <a href="#">InterPro</a>                   |
| Nlim_0847        | <a href="#">EGG42201</a> | Chemotaxis response regulator [Candidatus ... | <a href="#">CDD</a> | <a href="#">UniProt</a> | <a href="#">Pfam</a> | <a href="#">InterPro</a>                   |
| Nlim_0862        | <a href="#">EGG42216</a> | CheY-like receiver [Candidatus Nitrosoarch... | <a href="#">CDD</a> | <a href="#">UniProt</a> | <a href="#">Pfam</a> | <a href="#">InterPro</a>                   |
| Nlim_0894        | <a href="#">EGG42248</a> | Hypothetical protein Nlim_0894 [Candidatus... | <a href="#">CDD</a> | <a href="#">UniProt</a> | <a href="#">Pfam</a> | <a href="#">InterPro</a>                   |
| Nlim_0912        | <a href="#">EGG42266</a> | CheY-like receiver [Candidatus Nitrosoarch... | <a href="#">CDD</a> | <a href="#">UniProt</a> | <a href="#">Pfam</a> | <a href="#">InterPro</a>                   |
| Nlim_1129        | <a href="#">EGG42004</a> | response regulator receiver protein [Candi... | <a href="#">CDD</a> | <a href="#">UniProt</a> | <a href="#">Pfam</a> | <a href="#">InterPro</a>                   |
| Nlim_1313        | <a href="#">EGG41789</a> | CheY-like receiver [Candidatus Nitrosoarch... | <a href="#">CDD</a> | <a href="#">UniProt</a> | <a href="#">Pfam</a> | <a href="#">InterPro</a>                   |
| Nlim_1378        | <a href="#">EGG41761</a> | response regulator receiver protein [Candi... | <a href="#">CDD</a> | <a href="#">UniProt</a> | <a href="#">Pfam</a> | <a href="#">InterPro</a>                   |
| Nlim_1744        | <a href="#">EGG41452</a> | response regulator receiver protein [Candi... | <a href="#">CDD</a> | <a href="#">UniProt</a> | <a href="#">Pfam</a> | <a href="#">InterPro</a>                   |
| *Nlim_0460       | <a href="#">EGG42648</a> | Hypothetical protein Nlim_0460 [Candidatus... | <a href="#">CDD</a> | <a href="#">UniProt</a> | <a href="#">Pfam</a> | <a href="#">InterPro</a>                   |
| *Nlim_0838       | <a href="#">EGG42192</a> | Hypothetical protein Nlim_0838 [Candidatus... | <a href="#">CDD</a> | <a href="#">UniProt</a> | <a href="#">Pfam</a> | <a href="#">InterPro</a>                   |
| <b>TrmB-REC</b>  |                          |                                               |                     |                         |                      |                                            |
| Nlim_0171        | <a href="#">EGG42941</a> | response regulator receiver protein [Candi... | <a href="#">CDD</a> | <a href="#">UniProt</a> | <a href="#">Pfam</a> | <a href="#">InterPro</a>                   |
| <b>REC-CheB</b>  |                          |                                               |                     |                         |                      |                                            |
| Nlim_0478        | <a href="#">EGG42666</a> | Chemotaxis response regulator [Candidatus ... | <a href="#">CDD</a> | <a href="#">UniProt</a> | <a href="#">Pfam</a> | <a href="#">InterPro</a>                   |
| <b>REC-HisK</b>  |                          |                                               |                     |                         |                      |                                            |
| Nlim_0782        | <a href="#">EGG42337</a> | Signal transduction histidine kinase [Cand... | <a href="#">CDD</a> | <a href="#">UniProt</a> | <a href="#">Pfam</a> | <a href="#">InterPro</a>                   |
| <b>TPR-REC</b>   |                          |                                               |                     |                         |                      |                                            |
| Nlim_0076        | <a href="#">EGG43026</a> | Hypothetical protein Nlim_0076 [Candidatus... | <a href="#">CDD</a> | <a href="#">UniProt</a> | <a href="#">Pfam</a> | <a href="#">InterPro</a> (TPR-TPR-TPR-REC) |
| <b>Other RRs</b> |                          |                                               |                     |                         |                      |                                            |
| Nlim_0427        | <a href="#">EGG42714</a> | CheY-like receiver [Candidatus Nitrosoarch... | <a href="#">CDD</a> | <a href="#">UniProt</a> | <a href="#">Pfam</a> | <a href="#">InterPro</a> (REC-TackOD1)     |

### Candidatus Nitrosopumilus adriaticus

#### **HisK, no REC**

|               |                          |                                             |                     |                         |                      |                          |
|---------------|--------------------------|---------------------------------------------|---------------------|-------------------------|----------------------|--------------------------|
| NADRNF5_0257  | <a href="#">AJW69956</a> | PAS/PAC sensor signal transduction histi... | <a href="#">CDD</a> | <a href="#">UniProt</a> | <a href="#">Pfam</a> | <a href="#">InterPro</a> |
| NADRNF5_0796  | <a href="#">AJW70490</a> | ATPase/histidine kinase/DNA gyrase B/HSP... | <a href="#">CDD</a> | <a href="#">UniProt</a> | <a href="#">Pfam</a> | <a href="#">InterPro</a> |
| NADRNF5_0803  | <a href="#">AJW70497</a> | chemotaxis sensor histidine kinase CheA ... | <a href="#">CDD</a> | <a href="#">UniProt</a> | <a href="#">Pfam</a> | <a href="#">InterPro</a> |
| NADRNF5_0830  | <a href="#">AJW70524</a> | Signal transduction histidine kinase [Ca... | <a href="#">CDD</a> | <a href="#">UniProt</a> | <a href="#">Pfam</a> | <a href="#">InterPro</a> |
| NADRNF5_0838  | <a href="#">AJW70532</a> | ATPase/histidine kinase/DNA gyrase B/HSP... | <a href="#">CDD</a> | <a href="#">UniProt</a> | <a href="#">Pfam</a> | <a href="#">InterPro</a> |
| NADRNF5_0876  | <a href="#">AJW70570</a> | ATPase/histidine kinase/DNA gyrase B/HSP... | <a href="#">CDD</a> | <a href="#">UniProt</a> | <a href="#">Pfam</a> | <a href="#">InterPro</a> |
| NADRNF5_0915  | <a href="#">AJW70609</a> | Signal transduction histidine kinase [Ca... | <a href="#">CDD</a> | <a href="#">UniProt</a> | <a href="#">Pfam</a> | <a href="#">InterPro</a> |
| NADRNF5_0932  | <a href="#">AJW70626</a> | PAS domain S-box [Candidatus Nitrosopumi... | <a href="#">CDD</a> | <a href="#">UniProt</a> | <a href="#">Pfam</a> | <a href="#">InterPro</a> |
| NADRNF5_1098  | <a href="#">AJW70788</a> | Histidine kinase [Candidatus Nitrosopumi... | <a href="#">CDD</a> | <a href="#">UniProt</a> | <a href="#">Pfam</a> | <a href="#">InterPro</a> |
| NADRNF5_1201  | <a href="#">AJW70889</a> | ATPase/histidine kinase/DNA gyrase B/HSP... | <a href="#">CDD</a> | <a href="#">UniProt</a> | <a href="#">Pfam</a> | <a href="#">InterPro</a> |
| NADRNF5_1294  | <a href="#">AJW70980</a> | putative Histidine kinase [Candidatus Ni... | <a href="#">CDD</a> | <a href="#">UniProt</a> | <a href="#">Pfam</a> | <a href="#">InterPro</a> |
| NADRNF5_1555  | <a href="#">AJW71236</a> | Signal transduction histidine kinase [Ca... | <a href="#">CDD</a> | <a href="#">UniProt</a> | <a href="#">Pfam</a> | <a href="#">InterPro</a> |
| NADRNF5_1608  | <a href="#">AJW71289</a> | Sensor protein [Candidatus Nitrosopumilu... | <a href="#">CDD</a> | <a href="#">UniProt</a> | <a href="#">Pfam</a> | <a href="#">InterPro</a> |
| NADRNF5_1610  | <a href="#">AJW71291</a> | putative Histidine kinase [Candidatus Ni... | <a href="#">CDD</a> | <a href="#">UniProt</a> | <a href="#">Pfam</a> | <a href="#">InterPro</a> |
| NADRNF5_1612  | <a href="#">AJW71293</a> | Histidine kinase [Candidatus Nitrosopumi... | <a href="#">CDD</a> | <a href="#">UniProt</a> | <a href="#">Pfam</a> | <a href="#">InterPro</a> |
| NADRNF5_1796  | <a href="#">AJW71474</a> | Histidine kinase [Candidatus Nitrosopumi... | <a href="#">CDD</a> | <a href="#">UniProt</a> | <a href="#">Pfam</a> | <a href="#">InterPro</a> |
| NADRNF5_1806  | <a href="#">AJW71484</a> | Histidine kinase [Candidatus Nitrosopumi... | <a href="#">CDD</a> | <a href="#">UniProt</a> | <a href="#">Pfam</a> | <a href="#">InterPro</a> |
| NADRNF5_1813  | <a href="#">AJW71491</a> | ATPase/histidine kinase/DNA gyrase B/HSP... | <a href="#">CDD</a> | <a href="#">UniProt</a> | <a href="#">Pfam</a> | <a href="#">InterPro</a> |
| NADRNF5_1815  | <a href="#">AJW71493</a> | putative Histidine kinase [Candidatus Ni... | <a href="#">CDD</a> | <a href="#">UniProt</a> | <a href="#">Pfam</a> | <a href="#">InterPro</a> |
| NADRNF5_1875  | <a href="#">AJW71553</a> | putative Histidine kinase [Candidatus Ni... | <a href="#">CDD</a> | <a href="#">UniProt</a> | <a href="#">Pfam</a> | <a href="#">InterPro</a> |
| NADRNF5_2062  | <a href="#">AJW71736</a> | Histidine kinase [Candidatus Nitrosopumi... | <a href="#">CDD</a> | <a href="#">UniProt</a> | <a href="#">Pfam</a> | <a href="#">InterPro</a> |
| NADRNF5_1631  | <a href="#">AJW71311</a> | Sensor protein ZraS [Candidatus Nitrosop... | <a href="#">CDD</a> | <a href="#">UniProt</a> | <a href="#">Pfam</a> | <a href="#">InterPro</a> |
| *NADRNF5_1632 | <a href="#">AJW71312</a> | membrane protein of unknown function [Ca... | <a href="#">CDD</a> | <a href="#">UniProt</a> | <a href="#">Pfam</a> | <a href="#">InterPro</a> |

#### **REC only**

|              |                          |                                             |                     |                         |                      |                          |
|--------------|--------------------------|---------------------------------------------|---------------------|-------------------------|----------------------|--------------------------|
| NADRNF5_0878 | <a href="#">AJW70572</a> | putative chemotaxis response regulator r... | <a href="#">CDD</a> | <a href="#">UniProt</a> | <a href="#">Pfam</a> | <a href="#">InterPro</a> |
| NADRNF5_0520 | <a href="#">AJW70216</a> | putative chemotaxis response regulator r... | <a href="#">CDD</a> | <a href="#">UniProt</a> | <a href="#">Pfam</a> | <a href="#">InterPro</a> |
| NADRNF5_0800 | <a href="#">AJW70494</a> | putative chemotaxis response regulator r... | <a href="#">CDD</a> | <a href="#">UniProt</a> | <a href="#">Pfam</a> | <a href="#">InterPro</a> |
| NADRNF5_0760 | <a href="#">AJW70454</a> | putative chemotaxis response regulator r... | <a href="#">CDD</a> | <a href="#">UniProt</a> | <a href="#">Pfam</a> | <a href="#">InterPro</a> |
| NADRNF5_2087 | <a href="#">AJW71760</a> | putative chemotaxis response regulator r... | <a href="#">CDD</a> | <a href="#">UniProt</a> | <a href="#">Pfam</a> | <a href="#">InterPro</a> |
| NADRNF5_2089 | <a href="#">AJW71762</a> | putative chemotaxis response regulator r... | <a href="#">CDD</a> | <a href="#">UniProt</a> | <a href="#">Pfam</a> | <a href="#">InterPro</a> |
| NADRNF5_2061 | <a href="#">AJW71735</a> | Response regulator receiver domain prote... | <a href="#">CDD</a> | <a href="#">UniProt</a> | <a href="#">Pfam</a> | <a href="#">InterPro</a> |

|                  |                          |                                             |     |                         |                      |                          |                   |
|------------------|--------------------------|---------------------------------------------|-----|-------------------------|----------------------|--------------------------|-------------------|
| NADRN5_1807      | <a href="#">AJW71485</a> | Response regulator receiver protein [Can... | CDD | <a href="#">UniProt</a> | <a href="#">Pfam</a> | <a href="#">InterPro</a> |                   |
| NADRN5_1798      | <a href="#">AJW71476</a> | Response regulator receiver protein [Can... | CDD | <a href="#">UniProt</a> | <a href="#">Pfam</a> | <a href="#">InterPro</a> |                   |
| NADRN5_1840      | <a href="#">AJW71518</a> | Response regulator receiver protein [Can... | CDD | <a href="#">UniProt</a> | <a href="#">Pfam</a> | <a href="#">InterPro</a> |                   |
| NADRN5_0264      | <a href="#">AJW69962</a> | Response regulator receiver protein [Can... | CDD | <a href="#">UniProt</a> | <a href="#">Pfam</a> | <a href="#">InterPro</a> |                   |
| NADRN5_0795      | <a href="#">AJW70489</a> | putative chemotaxis response regulator r... | CDD | <a href="#">UniProt</a> | <a href="#">Pfam</a> | <a href="#">InterPro</a> |                   |
| NADRN5_1039      | <a href="#">AJW70730</a> | Response regulator receiver protein [Can... | CDD | <a href="#">UniProt</a> | <a href="#">Pfam</a> | <a href="#">InterPro</a> |                   |
| NADRN5_0825      | <a href="#">AJW70519</a> | putative chemotaxis response regulator r... | CDD | <a href="#">UniProt</a> | <a href="#">Pfam</a> | <a href="#">InterPro</a> |                   |
| NADRN5_0797      | <a href="#">AJW70491</a> | putative chemotaxis response regulator r... | CDD | <a href="#">UniProt</a> | <a href="#">Pfam</a> | <a href="#">InterPro</a> |                   |
| NADRN5_0694      | <a href="#">AJW70389</a> | Response regulator receiver domain prote... | CDD | <a href="#">UniProt</a> | <a href="#">Pfam</a> | <a href="#">InterPro</a> |                   |
| NADRN5_1404      | <a href="#">AJW71089</a> | putative chemotaxis response regulator r... | CDD | <a href="#">UniProt</a> | <a href="#">Pfam</a> | <a href="#">InterPro</a> |                   |
| NADRN5_0397      | <a href="#">AJW70093</a> | hypothetical protein NADRN5_0397 [Candi...  | CDD | <a href="#">UniProt</a> | <a href="#">Pfam</a> | <a href="#">InterPro</a> |                   |
| NADRN5_0794      | <a href="#">AJW70488</a> | putative chemotaxis response regulator r... | CDD | <a href="#">UniProt</a> | <a href="#">Pfam</a> | <a href="#">InterPro</a> |                   |
| NADRN5_1609      | <a href="#">AJW71290</a> | Response regulator receiver protein [Can... | CDD | <a href="#">UniProt</a> | <a href="#">Pfam</a> | <a href="#">InterPro</a> |                   |
| NADRN5_1887      | <a href="#">AJW71565</a> | putative chemotaxis response regulator r... | CDD | <a href="#">UniProt</a> | <a href="#">Pfam</a> | <a href="#">InterPro</a> |                   |
| NADRN5_0258      | <a href="#">AJW69957</a> | response regulator receiver protein [Can... | CDD | <a href="#">UniProt</a> | <a href="#">Pfam</a> | <a href="#">InterPro</a> |                   |
| NADRN5_0844      | <a href="#">AJW70538</a> | putative chemotaxis response regulator r... | CDD | <a href="#">UniProt</a> | <a href="#">Pfam</a> | <a href="#">InterPro</a> |                   |
| NADRN5_0831      | <a href="#">AJW70525</a> | putative chemotaxis response regulator r... | CDD | <a href="#">UniProt</a> | <a href="#">Pfam</a> | <a href="#">InterPro</a> |                   |
| NADRN5_1402      | <a href="#">AJW71087</a> | Response regulator receiver protein (mod... | CDD | <a href="#">UniProt</a> | <a href="#">Pfam</a> | <a href="#">InterPro</a> |                   |
| NADRN5_1099      | <a href="#">AJW70789</a> | Response regulator receiver protein [Can... | CDD | <a href="#">UniProt</a> | <a href="#">Pfam</a> | <a href="#">InterPro</a> |                   |
| NADRN5_1293      | <a href="#">AJW70979</a> | putative Response regulator receiver pro... | CDD | <a href="#">UniProt</a> | <a href="#">Pfam</a> | <a href="#">InterPro</a> |                   |
| NADRN5_2088      | <a href="#">AJW71761</a> | chemotaxis response regulator protein-gl... | CDD | <a href="#">UniProt</a> | <a href="#">Pfam</a> | <a href="#">InterPro</a> |                   |
| <b>REC-CheB</b>  |                          |                                             |     |                         |                      |                          |                   |
| NADRN5_0804      | <a href="#">AJW70498</a> | chemotaxis response regulator protein-gl... | CDD | <a href="#">UniProt</a> | <a href="#">Pfam</a> | <a href="#">InterPro</a> |                   |
| <b>TrmB-REC</b>  |                          |                                             |     |                         |                      |                          |                   |
| NADRN5_1556      | <a href="#">AJW71237</a> | Response regulator receiver protein [Can... | CDD | <a href="#">UniProt</a> | <a href="#">Pfam</a> | <a href="#">InterPro</a> |                   |
| <b>TPR-REC</b>   |                          |                                             |     |                         |                      |                          |                   |
| NADRN5_1661      | <a href="#">AJW71341</a> | Response regulator receiver and ANTAR do... | CDD | <a href="#">UniProt</a> | <a href="#">Pfam</a> | <a href="#">InterPro</a> | (TPR-TPR-TPR-REC) |
| <b>Other RRs</b> |                          |                                             |     |                         |                      |                          |                   |
| NADRN5_1202      | <a href="#">AJW70890</a> | putative chemotaxis response regulator r... | CDD | <a href="#">UniProt</a> | <a href="#">Pfam</a> | <a href="#">InterPro</a> | (unique)          |
| NADRN5_1240      | <a href="#">AJW70928</a> | Response regulator receiver domain prote... | CDD | <a href="#">UniProt</a> | <a href="#">Pfam</a> | <a href="#">InterPro</a> | (FeS domain)      |
| NADRN5_1333      | <a href="#">AJW71019</a> | Response regulator receiver domain prote... | CDD | <a href="#">UniProt</a> | <a href="#">Pfam</a> | <a href="#">InterPro</a> | (FeS domain)      |

#### Candidatus Nitrosopumilus koreensis ARI

##### **HisK, no REC**

|             |                          |                                               |     |                         |                      |                          |  |
|-------------|--------------------------|-----------------------------------------------|-----|-------------------------|----------------------|--------------------------|--|
| NKOR_00745  | <a href="#">AFS80067</a> | histidine kinase [Candidatus Nitrosopumilu... | CDD | <a href="#">UniProt</a> | <a href="#">Pfam</a> | <a href="#">InterPro</a> |  |
| NKOR_01745  | <a href="#">AFS80255</a> | histidine kinase [Candidatus Nitrosopumilu... | CDD | <a href="#">UniProt</a> | <a href="#">Pfam</a> | <a href="#">InterPro</a> |  |
| NKOR_02260  | <a href="#">AFS80352</a> | histidine kinase [Candidatus Nitrosopumilu... | CDD | <a href="#">UniProt</a> | <a href="#">Pfam</a> | <a href="#">InterPro</a> |  |
| NKOR_03025  | <a href="#">AFS80499</a> | PAS/PAC sensor signal transduction histidi... | CDD | <a href="#">UniProt</a> | <a href="#">Pfam</a> | <a href="#">InterPro</a> |  |
| NKOR_04865  | <a href="#">AFS80859</a> | PAS/PAC sensor signal transduction histidi... | CDD | <a href="#">UniProt</a> | <a href="#">Pfam</a> | <a href="#">InterPro</a> |  |
| NKOR_05185  | <a href="#">AFS80923</a> | histidine kinase [Candidatus Nitrosopumilu... | CDD | <a href="#">UniProt</a> | <a href="#">Pfam</a> | <a href="#">InterPro</a> |  |
| NKOR_05930  | <a href="#">AFS81069</a> | histidine kinase [Candidatus Nitrosopumilu... | CDD | <a href="#">UniProt</a> | <a href="#">Pfam</a> | <a href="#">InterPro</a> |  |
| *NKOR_05935 | <a href="#">AFS81070</a> | hypothetical protein NKOR_05935 [Candidatu... | CDD | <a href="#">UniProt</a> | <a href="#">Pfam</a> | <a href="#">InterPro</a> |  |
| NKOR_05970  | <a href="#">AFS81077</a> | PAS/PAC sensor signal transduction histidi... | CDD | <a href="#">UniProt</a> | <a href="#">Pfam</a> | <a href="#">InterPro</a> |  |
| NKOR_06145  | <a href="#">AFS81110</a> | histidine kinase [Candidatus Nitrosopumilu... | CDD | <a href="#">UniProt</a> | <a href="#">Pfam</a> | <a href="#">InterPro</a> |  |
| NKOR_06360  | <a href="#">AFS81151</a> | integral membrane sensor signal transducti... | CDD | <a href="#">UniProt</a> | <a href="#">Pfam</a> | <a href="#">InterPro</a> |  |
| NKOR_07465  | <a href="#">AFS81354</a> | PAS/PAC sensor signal transduction histidi... | CDD | <a href="#">UniProt</a> | <a href="#">Pfam</a> | <a href="#">InterPro</a> |  |
| NKOR_08145  | <a href="#">AFS81490</a> | histidine kinase [Candidatus Nitrosopumilu... | CDD | <a href="#">UniProt</a> | <a href="#">Pfam</a> | <a href="#">InterPro</a> |  |

##### **REC only**

|            |                          |                                               |     |                         |                      |                          |  |
|------------|--------------------------|-----------------------------------------------|-----|-------------------------|----------------------|--------------------------|--|
| NKOR_00740 | <a href="#">AFS80066</a> | response regulator receiver protein [Candi... | CDD | <a href="#">UniProt</a> | <a href="#">Pfam</a> | <a href="#">InterPro</a> |  |
| NKOR_01775 | <a href="#">AFS80261</a> | response regulator receiver protein [Candi... | CDD | <a href="#">UniProt</a> | <a href="#">Pfam</a> | <a href="#">InterPro</a> |  |
| NKOR_01875 | <a href="#">AFS80281</a> | response regulator receiver protein [Candi... | CDD | <a href="#">UniProt</a> | <a href="#">Pfam</a> | <a href="#">InterPro</a> |  |
| NKOR_02265 | <a href="#">AFS80353</a> | response regulator receiver protein [Candi... | CDD | <a href="#">UniProt</a> | <a href="#">Pfam</a> | <a href="#">InterPro</a> |  |
| NKOR_03020 | <a href="#">AFS80498</a> | response regulator receiver modulated digu... | CDD | <a href="#">UniProt</a> | <a href="#">Pfam</a> | <a href="#">InterPro</a> |  |
| NKOR_04860 | <a href="#">AFS80858</a> | protein MprA [Candidatus Nitrosopumilus ko... | CDD | <a href="#">UniProt</a> | <a href="#">Pfam</a> | <a href="#">InterPro</a> |  |
| NKOR_05945 | <a href="#">AFS81072</a> | response regulator receiver protein [Candi... | CDD | <a href="#">UniProt</a> | <a href="#">Pfam</a> | <a href="#">InterPro</a> |  |
| NKOR_05965 | <a href="#">AFS81076</a> | response regulator [Candidatus Nitrosopumi... | CDD | <a href="#">UniProt</a> | <a href="#">Pfam</a> | <a href="#">InterPro</a> |  |
| NKOR_06350 | <a href="#">AFS81149</a> | two-component response regulator involved ... | CDD | <a href="#">UniProt</a> | <a href="#">Pfam</a> | <a href="#">InterPro</a> |  |
| NKOR_07460 | <a href="#">AFS81353</a> | response regulator receiver protein [Candi... | CDD | <a href="#">UniProt</a> | <a href="#">Pfam</a> | <a href="#">InterPro</a> |  |
| NKOR_08150 | <a href="#">AFS81491</a> | response regulator receiver protein [Candi... | CDD | <a href="#">UniProt</a> | <a href="#">Pfam</a> | <a href="#">InterPro</a> |  |
| NKOR_08810 | <a href="#">AFS81613</a> | response regulator receiver protein [Candi... | CDD | <a href="#">UniProt</a> | <a href="#">Pfam</a> | <a href="#">InterPro</a> |  |

##### **TPR-REC**

|            |                          |                                               |     |                         |                      |                          |  |
|------------|--------------------------|-----------------------------------------------|-----|-------------------------|----------------------|--------------------------|--|
| NKOR_02705 | <a href="#">AFS80435</a> | response regulator receiver and ANTAR doma... | CDD | <a href="#">UniProt</a> | <a href="#">Pfam</a> | <a href="#">InterPro</a> |  |
|------------|--------------------------|-----------------------------------------------|-----|-------------------------|----------------------|--------------------------|--|

##### **Other RRs**

|            |                          |                                               |     |                         |                      |                          |               |
|------------|--------------------------|-----------------------------------------------|-----|-------------------------|----------------------|--------------------------|---------------|
| NKOR_04960 | <a href="#">AFS80878</a> | histidine kinase [Candidatus Nitrosopumilu... | CDD | <a href="#">UniProt</a> | <a href="#">Pfam</a> | <a href="#">InterPro</a> | (NitrOD4-REC) |
| NKOR_04565 | <a href="#">AFS80801</a> | hypothetical protein NKOR_04565 [Candidatu... | CDD | <a href="#">UniProt</a> | <a href="#">Pfam</a> | <a href="#">InterPro</a> | (REC-TackOD1) |

#### Candidatus Nitrosopumilus piranensis

##### **HisK, no REC**

|              |                          |                                             |     |                         |                      |                          |  |
|--------------|--------------------------|---------------------------------------------|-----|-------------------------|----------------------|--------------------------|--|
| NPIRD3C_1703 | <a href="#">AJM92915</a> | putative Histidine kinase [Candidatus Ni... | CDD | <a href="#">UniProt</a> | <a href="#">Pfam</a> | <a href="#">InterPro</a> |  |
| NPIRD3C_1833 | <a href="#">AJM93043</a> | putative Histidine kinase [Candidatus Ni... | CDD | <a href="#">UniProt</a> | <a href="#">Pfam</a> | <a href="#">InterPro</a> |  |

##### **REC only**

|               |                          |                                             |     |                         |                      |                          |  |
|---------------|--------------------------|---------------------------------------------|-----|-------------------------|----------------------|--------------------------|--|
| NPIRD3C_1061  | <a href="#">AJM92273</a> | putative chemotaxis response regulator r... | CDD | <a href="#">UniProt</a> | <a href="#">Pfam</a> | <a href="#">InterPro</a> |  |
| *NPIRD3C_0946 | <a href="#">AJM92158</a> | Sensor histidine kinase/response regulat... | CDD | <a href="#">UniProt</a> | <a href="#">Pfam</a> | <a href="#">InterPro</a> |  |

##### **Other RRs**

|              |                          |                                             |     |                         |                      |                          |                    |
|--------------|--------------------------|---------------------------------------------|-----|-------------------------|----------------------|--------------------------|--------------------|
| NPIRD3C_1834 | <a href="#">AJM93044</a> | hypothetical protein NPIRD3C_1834 [Candi... | CDD | <a href="#">UniProt</a> | <a href="#">Pfam</a> | <a href="#">InterPro</a> | (no archaeal hits) |
| NPIRD3C_0940 | <a href="#">AJM92152</a> | conserved membrane protein of unknown fu... | CDD | <a href="#">UniProt</a> | <a href="#">Pfam</a> | <a href="#">InterPro</a> | (RhaT/EamA-REC)    |

---

### Candidatus Nitrosopumilus sediminis

#### HisK, no REC

|            |                          |                                               |                     |                         |                      |                          |
|------------|--------------------------|-----------------------------------------------|---------------------|-------------------------|----------------------|--------------------------|
| NSED_00425 | <a href="#">AFS81897</a> | histidine kinase [Candidatus Nitrosopumilu... | <a href="#">CDD</a> | <a href="#">UniProt</a> | <a href="#">Pfam</a> | <a href="#">InterPro</a> |
| NSED_04350 | <a href="#">AFS82676</a> | histidine kinase [Candidatus Nitrosopumilu... | <a href="#">CDD</a> | <a href="#">UniProt</a> | <a href="#">Pfam</a> | <a href="#">InterPro</a> |
| NSED_04820 | <a href="#">AFS82768</a> | integral membrane sensor signal transducti... | <a href="#">CDD</a> | <a href="#">UniProt</a> | <a href="#">Pfam</a> | <a href="#">InterPro</a> |
| NSED_05770 | <a href="#">AFS82956</a> | histidine kinase [Candidatus Nitrosopumilu... | <a href="#">CDD</a> | <a href="#">UniProt</a> | <a href="#">Pfam</a> | <a href="#">InterPro</a> |
| NSED_06180 | <a href="#">AFS83038</a> | integral membrane sensor signal transducti... | <a href="#">CDD</a> | <a href="#">UniProt</a> | <a href="#">Pfam</a> | <a href="#">InterPro</a> |
| NSED_06525 | <a href="#">AFS83105</a> | histidine kinase [Candidatus Nitrosopumilu... | <a href="#">CDD</a> | <a href="#">UniProt</a> | <a href="#">Pfam</a> | <a href="#">InterPro</a> |

#### REC only

|             |                          |                                               |                     |                         |                      |                          |
|-------------|--------------------------|-----------------------------------------------|---------------------|-------------------------|----------------------|--------------------------|
| NSED_00420  | <a href="#">AFS81896</a> | two component sigma54 specific Fis family ... | <a href="#">CDD</a> | <a href="#">UniProt</a> | <a href="#">Pfam</a> | <a href="#">InterPro</a> |
| NSED_04815  | <a href="#">AFS82767</a> | response regulator receiver protein [Candi... | <a href="#">CDD</a> | <a href="#">UniProt</a> | <a href="#">Pfam</a> | <a href="#">InterPro</a> |
| NSED_05350  | <a href="#">AFS82874</a> | response regulator receiver protein [Candi... | <a href="#">CDD</a> | <a href="#">UniProt</a> | <a href="#">Pfam</a> | <a href="#">InterPro</a> |
| NSED_06170  | <a href="#">AFS83036</a> | response regulator receiver protein [Candi... | <a href="#">CDD</a> | <a href="#">UniProt</a> | <a href="#">Pfam</a> | <a href="#">InterPro</a> |
| NSED_08760  | <a href="#">AFS83544</a> | response regulator receiver protein [Candi... | <a href="#">CDD</a> | <a href="#">UniProt</a> | <a href="#">Pfam</a> | <a href="#">InterPro</a> |
| *NSED_00495 | <a href="#">AFS81911</a> | response regulator receiver protein [Candi... | <a href="#">CDD</a> | <a href="#">UniProt</a> | <a href="#">Pfam</a> | <a href="#">InterPro</a> |

#### TPR-REC

|            |                          |                                               |                     |                         |                      |                          |                   |
|------------|--------------------------|-----------------------------------------------|---------------------|-------------------------|----------------------|--------------------------|-------------------|
| NSED_02635 | <a href="#">AFS82335</a> | two-component response regulator KdpE [Can... | <a href="#">CDD</a> | <a href="#">UniProt</a> | <a href="#">Pfam</a> | <a href="#">InterPro</a> | (TPR-TPR-TPR-REC) |
|------------|--------------------------|-----------------------------------------------|---------------------|-------------------------|----------------------|--------------------------|-------------------|

#### Other RRs

|            |                          |                                               |                     |                         |                      |                          |               |
|------------|--------------------------|-----------------------------------------------|---------------------|-------------------------|----------------------|--------------------------|---------------|
| NSED_03545 | <a href="#">AFS82515</a> | response regulator receiver protein [Candi... | <a href="#">CDD</a> | <a href="#">UniProt</a> | <a href="#">Pfam</a> | <a href="#">InterPro</a> | (REC-NitrOD1) |
| NSED_04940 | <a href="#">AFS82792</a> | response regulator receiver protein [Candi... | <a href="#">CDD</a> | <a href="#">UniProt</a> | <a href="#">Pfam</a> | <a href="#">InterPro</a> | (REC-NitrOD1) |
| NSED_05360 | <a href="#">AFS82876</a> | response regulator receiver protein [Candi... | <a href="#">CDD</a> | <a href="#">UniProt</a> | <a href="#">Pfam</a> | <a href="#">InterPro</a> | (REC-NitrOD1) |
| NSED_05820 | <a href="#">AFS82966</a> | response regulator receiver protein [Candi... | <a href="#">CDD</a> | <a href="#">UniProt</a> | <a href="#">Pfam</a> | <a href="#">InterPro</a> | (REC-NitrOD1) |

---

### Candidatus Nitrososphaera evergladensis SR1

#### HisK, no REC

|           |                          |                                               |                     |                         |                      |                          |
|-----------|--------------------------|-----------------------------------------------|---------------------|-------------------------|----------------------|--------------------------|
| NTE_00160 | <a href="#">AIF82242</a> | signal transduction histidine kinase [Cand... | <a href="#">CDD</a> | <a href="#">UniProt</a> | <a href="#">Pfam</a> | <a href="#">InterPro</a> |
| NTE_00201 | <a href="#">AIF82283</a> | histidine kinase [Candidatus Nitrososphaer... | <a href="#">CDD</a> | <a href="#">UniProt</a> | <a href="#">Pfam</a> | <a href="#">InterPro</a> |
| NTE_00233 | <a href="#">AIF82315</a> | signal transduction histidine kinase [Cand... | <a href="#">CDD</a> | <a href="#">UniProt</a> | <a href="#">Pfam</a> | <a href="#">InterPro</a> |
| NTE_00338 | <a href="#">AIF82420</a> | histidine kinase [Candidatus Nitrososphaer... | <a href="#">CDD</a> | <a href="#">UniProt</a> | <a href="#">Pfam</a> | <a href="#">InterPro</a> |
| NTE_00370 | <a href="#">AIF82452</a> | signal transduction histidine kinase [Cand... | <a href="#">CDD</a> | <a href="#">UniProt</a> | <a href="#">Pfam</a> | <a href="#">InterPro</a> |
| NTE_00468 | <a href="#">AIF82550</a> | signal transduction histidine kinase [Cand... | <a href="#">CDD</a> | <a href="#">UniProt</a> | <a href="#">Pfam</a> | <a href="#">InterPro</a> |
| NTE_00852 | <a href="#">AIF82928</a> | PAS domain S-box [Candidatus Nitrososphaer... | <a href="#">CDD</a> | <a href="#">UniProt</a> | <a href="#">Pfam</a> | <a href="#">InterPro</a> |
| NTE_01052 | <a href="#">AIF83125</a> | histidine kinase [Candidatus Nitrososphaer... | <a href="#">CDD</a> | <a href="#">UniProt</a> | <a href="#">Pfam</a> | <a href="#">InterPro</a> |
| NTE_01439 | <a href="#">AIF83503</a> | signal transduction histidine kinase [Cand... | <a href="#">CDD</a> | <a href="#">UniProt</a> | <a href="#">Pfam</a> | <a href="#">InterPro</a> |
| NTE_01471 | <a href="#">AIF83535</a> | signal transduction histidine kinase [Cand... | <a href="#">CDD</a> | <a href="#">UniProt</a> | <a href="#">Pfam</a> | <a href="#">InterPro</a> |
| NTE_01492 | <a href="#">AIF83555</a> | histidine kinase [Candidatus Nitrososphaer... | <a href="#">CDD</a> | <a href="#">UniProt</a> | <a href="#">Pfam</a> | <a href="#">InterPro</a> |
| NTE_01496 | <a href="#">AIF83559</a> | signal transduction histidine kinase [Cand... | <a href="#">CDD</a> | <a href="#">UniProt</a> | <a href="#">Pfam</a> | <a href="#">InterPro</a> |
| NTE_01820 | <a href="#">AIF83880</a> | signal transduction histidine kinase [Cand... | <a href="#">CDD</a> | <a href="#">UniProt</a> | <a href="#">Pfam</a> | <a href="#">InterPro</a> |
| NTE_01927 | <a href="#">AIF83986</a> | signal transduction histidine kinase [Cand... | <a href="#">CDD</a> | <a href="#">UniProt</a> | <a href="#">Pfam</a> | <a href="#">InterPro</a> |
| NTE_02123 | <a href="#">AIF84178</a> | signal transduction histidine kinase [Cand... | <a href="#">CDD</a> | <a href="#">UniProt</a> | <a href="#">Pfam</a> | <a href="#">InterPro</a> |
| NTE_02155 | <a href="#">AIF84209</a> | signal transduction histidine kinase [Cand... | <a href="#">CDD</a> | <a href="#">UniProt</a> | <a href="#">Pfam</a> | <a href="#">InterPro</a> |
| NTE_02334 | <a href="#">AIF84387</a> | signal transduction histidine kinase [Cand... | <a href="#">CDD</a> | <a href="#">UniProt</a> | <a href="#">Pfam</a> | <a href="#">InterPro</a> |
| NTE_02348 | <a href="#">AIF84400</a> | chemotaxis protein histidine kinase-like p... | <a href="#">CDD</a> | <a href="#">UniProt</a> | <a href="#">Pfam</a> | <a href="#">InterPro</a> |
| NTE_02940 | <a href="#">AIF84976</a> | PAS domain S-box [Candidatus Nitrososphaer... | <a href="#">CDD</a> | <a href="#">UniProt</a> | <a href="#">Pfam</a> | <a href="#">InterPro</a> |

#### REC only

|            |                          |                                               |                     |                         |                      |                          |
|------------|--------------------------|-----------------------------------------------|---------------------|-------------------------|----------------------|--------------------------|
| NTE_00090  | <a href="#">AIF82174</a> | response regulator with CheY-like receiver... | <a href="#">CDD</a> | <a href="#">UniProt</a> | <a href="#">Pfam</a> | <a href="#">InterPro</a> |
| NTE_00162  | <a href="#">AIF82244</a> | response regulator with CheY-like receiver... | <a href="#">CDD</a> | <a href="#">UniProt</a> | <a href="#">Pfam</a> | <a href="#">InterPro</a> |
| NTE_00195  | <a href="#">AIF82277</a> | response regulator with CheY-like receiver... | <a href="#">CDD</a> | <a href="#">UniProt</a> | <a href="#">Pfam</a> | <a href="#">InterPro</a> |
| NTE_00356  | <a href="#">AIF82438</a> | response regulator with CheY-like receiver... | <a href="#">CDD</a> | <a href="#">UniProt</a> | <a href="#">Pfam</a> | <a href="#">InterPro</a> |
| NTE_00851  | <a href="#">AIF82927</a> | response regulator with CheY-like receiver... | <a href="#">CDD</a> | <a href="#">UniProt</a> | <a href="#">Pfam</a> | <a href="#">InterPro</a> |
| NTE_01320  | <a href="#">AIF83388</a> | response regulator with CheY-like receiver... | <a href="#">CDD</a> | <a href="#">UniProt</a> | <a href="#">Pfam</a> | <a href="#">InterPro</a> |
| NTE_01491  | <a href="#">AIF83554</a> | response regulator with CheY-like receiver... | <a href="#">CDD</a> | <a href="#">UniProt</a> | <a href="#">Pfam</a> | <a href="#">InterPro</a> |
| NTE_01926  | <a href="#">AIF83985</a> | response regulator with CheY-like receiver... | <a href="#">CDD</a> | <a href="#">UniProt</a> | <a href="#">Pfam</a> | <a href="#">InterPro</a> |
| NTE_02124  | <a href="#">AIF84179</a> | response regulator with CheY-like receiver... | <a href="#">CDD</a> | <a href="#">UniProt</a> | <a href="#">Pfam</a> | <a href="#">InterPro</a> |
| NTE_02333  | <a href="#">AIF84386</a> | response regulator with CheY-like receiver... | <a href="#">CDD</a> | <a href="#">UniProt</a> | <a href="#">Pfam</a> | <a href="#">InterPro</a> |
| NTE_02346  | <a href="#">AIF84398</a> | response regulator containing CheY-like re... | <a href="#">CDD</a> | <a href="#">UniProt</a> | <a href="#">Pfam</a> | <a href="#">InterPro</a> |
| NTE_02941  | <a href="#">AIF84977</a> | response regulator with CheY-like receiver... | <a href="#">CDD</a> | <a href="#">UniProt</a> | <a href="#">Pfam</a> | <a href="#">InterPro</a> |
| *NTE_00211 | <a href="#">AIF82293</a> | hypothetical protein NTE_00211 [Candidatus... | <a href="#">CDD</a> | <a href="#">UniProt</a> | <a href="#">Pfam</a> | <a href="#">InterPro</a> |

#### REC-CheB

|           |                          |                                               |                     |                         |                      |                          |
|-----------|--------------------------|-----------------------------------------------|---------------------|-------------------------|----------------------|--------------------------|
| NTE_02347 | <a href="#">AIF84399</a> | chemotaxis response regulator containing a... | <a href="#">CDD</a> | <a href="#">UniProt</a> | <a href="#">Pfam</a> | <a href="#">InterPro</a> |
|-----------|--------------------------|-----------------------------------------------|---------------------|-------------------------|----------------------|--------------------------|

#### ACyc-REC

|           |                          |                                               |                     |                         |                      |                          |
|-----------|--------------------------|-----------------------------------------------|---------------------|-------------------------|----------------------|--------------------------|
| NTE_01493 | <a href="#">AIF83556</a> | response regulator with CheY-like receiver... | <a href="#">CDD</a> | <a href="#">UniProt</a> | <a href="#">Pfam</a> | <a href="#">InterPro</a> |
|-----------|--------------------------|-----------------------------------------------|---------------------|-------------------------|----------------------|--------------------------|

#### wHTH-REC

|           |                          |                                               |                     |                         |                      |                          |            |
|-----------|--------------------------|-----------------------------------------------|---------------------|-------------------------|----------------------|--------------------------|------------|
| NTE_01494 | <a href="#">AIF83557</a> | response regulator with CheY-like receiver... | <a href="#">CDD</a> | <a href="#">UniProt</a> | <a href="#">Pfam</a> | <a href="#">InterPro</a> | (wHTH-REC) |
|-----------|--------------------------|-----------------------------------------------|---------------------|-------------------------|----------------------|--------------------------|------------|

#### Other RRs

|           |                          |                                               |                     |                         |                      |                          |               |
|-----------|--------------------------|-----------------------------------------------|---------------------|-------------------------|----------------------|--------------------------|---------------|
| NTE_00171 | <a href="#">AIF82253</a> | response regulator containing CheY-like re... | <a href="#">CDD</a> | <a href="#">UniProt</a> | <a href="#">Pfam</a> | <a href="#">InterPro</a> | (REC-NitrOD2) |
| NTE_00257 | <a href="#">AIF82339</a> | response regulator with CheY-like receiver... | <a href="#">CDD</a> | <a href="#">UniProt</a> | <a href="#">Pfam</a> | <a href="#">InterPro</a> | (REC-TackOD1) |
| NTE_00367 | <a href="#">AIF82449</a> | response regulator with CheY-like receiver... | <a href="#">CDD</a> | <a href="#">UniProt</a> | <a href="#">Pfam</a> | <a href="#">InterPro</a> | (REC-NitrOD2) |
| NTE_01443 | <a href="#">AIF83507</a> | response regulator with CheY-like receiver... | <a href="#">CDD</a> | <a href="#">UniProt</a> | <a href="#">Pfam</a> | <a href="#">InterPro</a> | (NitrOD3-REC) |

---

### Candidatus Nitrososphaera gargensis Ga9.2

#### HisK, no REC

|             |                          |                                              |                     |                         |                      |                          |
|-------------|--------------------------|----------------------------------------------|---------------------|-------------------------|----------------------|--------------------------|
| Ngar_c08540 | <a href="#">AFU57796</a> | putative signal transduction histidine ki... | <a href="#">CDD</a> | <a href="#">UniProt</a> | <a href="#">Pfam</a> | <a href="#">InterPro</a> |
| Ngar_c08680 | <a href="#">AFU57810</a> | signal transduction histidine kinase, wit... | <a href="#">CDD</a> | <a href="#">UniProt</a> | <a href="#">Pfam</a> | <a href="#">InterPro</a> |
| Ngar_c08700 | <a href="#">AFU57812</a> | signal transduction histidine kinase, wit... | <a href="#">CDD</a> | <a href="#">UniProt</a> | <a href="#">Pfam</a> | <a href="#">InterPro</a> |

|                  |                          |                                              |                     |                         |                      |                          |                |
|------------------|--------------------------|----------------------------------------------|---------------------|-------------------------|----------------------|--------------------------|----------------|
| Ngar_c08930      | <a href="#">AFU57835</a> | signal transduction histidine kinase, wit... | <a href="#">CDD</a> | <a href="#">UniProt</a> | <a href="#">Pfam</a> | <a href="#">InterPro</a> |                |
| Ngar_c09690      | <a href="#">AFU57911</a> | signal transduction histidine kinase, wit... | <a href="#">CDD</a> | <a href="#">UniProt</a> | <a href="#">Pfam</a> | <a href="#">InterPro</a> |                |
| Ngar_c09970      | <a href="#">AFU57939</a> | putative signal transduction histidine ki... | <a href="#">CDD</a> | <a href="#">UniProt</a> | <a href="#">Pfam</a> | <a href="#">InterPro</a> |                |
| Ngar_c10180      | <a href="#">AFU57960</a> | chemotactic sensor histidine kinase CheA ... | <a href="#">CDD</a> | <a href="#">UniProt</a> | <a href="#">Pfam</a> | <a href="#">InterPro</a> |                |
| Ngar_c12530      | <a href="#">AFU58193</a> | putative signal transduction histidine ki... | <a href="#">CDD</a> | <a href="#">UniProt</a> | <a href="#">Pfam</a> | <a href="#">InterPro</a> |                |
| Ngar_c21530      | <a href="#">AFU59083</a> | signal transduction histidine kinase, wit... | <a href="#">CDD</a> | <a href="#">UniProt</a> | <a href="#">Pfam</a> | <a href="#">InterPro</a> |                |
| Ngar_c22010      | <a href="#">AFU59131</a> | signal transduction histidine kinase, wit... | <a href="#">CDD</a> | <a href="#">UniProt</a> | <a href="#">Pfam</a> | <a href="#">InterPro</a> |                |
| Ngar_c22090      | <a href="#">AFU59139</a> | putative signal transduction histidine ki... | <a href="#">CDD</a> | <a href="#">UniProt</a> | <a href="#">Pfam</a> | <a href="#">InterPro</a> |                |
| Ngar_c24800      | <a href="#">AFU59402</a> | signal transduction histidine kinase, wit... | <a href="#">CDD</a> | <a href="#">UniProt</a> | <a href="#">Pfam</a> | <a href="#">InterPro</a> |                |
| Ngar_c24860      | <a href="#">AFU59408</a> | putative signal transduction histidine ki... | <a href="#">CDD</a> | <a href="#">UniProt</a> | <a href="#">Pfam</a> | <a href="#">InterPro</a> |                |
| Ngar_c27670      | <a href="#">AFU59688</a> | signal transduction histidine kinase, wit... | <a href="#">CDD</a> | <a href="#">UniProt</a> | <a href="#">Pfam</a> | <a href="#">InterPro</a> |                |
| Ngar_c28690      | <a href="#">AFU59788</a> | putative signal transduction histidine ki... | <a href="#">CDD</a> | <a href="#">UniProt</a> | <a href="#">Pfam</a> | <a href="#">InterPro</a> |                |
| Ngar_c31260      | <a href="#">AFU60042</a> | putative signal transduction histidine ki... | <a href="#">CDD</a> | <a href="#">UniProt</a> | <a href="#">Pfam</a> | <a href="#">InterPro</a> |                |
| Ngar_c32750      | <a href="#">AFU60190</a> | signal transduction histidine kinase, wit... | <a href="#">CDD</a> | <a href="#">UniProt</a> | <a href="#">Pfam</a> | <a href="#">InterPro</a> |                |
| Ngar_c33320      | <a href="#">AFU60247</a> | putative signal transduction histidine ki... | <a href="#">CDD</a> | <a href="#">UniProt</a> | <a href="#">Pfam</a> | <a href="#">InterPro</a> |                |
| Ngar_c33500      | <a href="#">AFU60265</a> | putative signal transduction histidine ki... | <a href="#">CDD</a> | <a href="#">UniProt</a> | <a href="#">Pfam</a> | <a href="#">InterPro</a> |                |
| <b>REC only</b>  |                          |                                              |                     |                         |                      |                          |                |
| Ngar_c00050      | <a href="#">AFU56955</a> | putative signal transduction response reg... | <a href="#">CDD</a> | <a href="#">UniProt</a> | <a href="#">Pfam</a> | <a href="#">InterPro</a> |                |
| Ngar_c02520      | <a href="#">AFU57200</a> | putative signal transduction response reg... | <a href="#">CDD</a> | <a href="#">UniProt</a> | <a href="#">Pfam</a> | <a href="#">InterPro</a> |                |
| Ngar_c02740      | <a href="#">AFU57222</a> | putative signal transduction response reg... | <a href="#">CDD</a> | <a href="#">UniProt</a> | <a href="#">Pfam</a> | <a href="#">InterPro</a> |                |
| Ngar_c08410      | <a href="#">AFU57783</a> | putative signal transduction response reg... | <a href="#">CDD</a> | <a href="#">UniProt</a> | <a href="#">Pfam</a> | <a href="#">InterPro</a> |                |
| Ngar_c08520      | <a href="#">AFU57794</a> | putative signal transduction response reg... | <a href="#">CDD</a> | <a href="#">UniProt</a> | <a href="#">Pfam</a> | <a href="#">InterPro</a> |                |
| Ngar_c08880      | <a href="#">AFU57830</a> | putative two component transcriptional re... | <a href="#">CDD</a> | <a href="#">UniProt</a> | <a href="#">Pfam</a> | <a href="#">InterPro</a> |                |
| Ngar_c10200      | <a href="#">AFU57962</a> | chemotaxis response regulator CheY [Candi... | <a href="#">CDD</a> | <a href="#">UniProt</a> | <a href="#">Pfam</a> | <a href="#">InterPro</a> |                |
| Ngar_c10570      | <a href="#">AFU57999</a> | putative signal transduction response reg... | <a href="#">CDD</a> | <a href="#">UniProt</a> | <a href="#">Pfam</a> | <a href="#">InterPro</a> |                |
| Ngar_c10640      | <a href="#">AFU58006</a> | putative signal transduction response reg... | <a href="#">CDD</a> | <a href="#">UniProt</a> | <a href="#">Pfam</a> | <a href="#">InterPro</a> |                |
| Ngar_c13050      | <a href="#">AFU58243</a> | putative signal transduction response reg... | <a href="#">CDD</a> | <a href="#">UniProt</a> | <a href="#">Pfam</a> | <a href="#">InterPro</a> |                |
| Ngar_c13380      | <a href="#">AFU58276</a> | putative signal transduction response reg... | <a href="#">CDD</a> | <a href="#">UniProt</a> | <a href="#">Pfam</a> | <a href="#">InterPro</a> |                |
| Ngar_c14130      | <a href="#">AFU58349</a> | putative signal transduction response reg... | <a href="#">CDD</a> | <a href="#">UniProt</a> | <a href="#">Pfam</a> | <a href="#">InterPro</a> |                |
| Ngar_c16500      | <a href="#">AFU58583</a> | response regulatory domain-containing pro... | <a href="#">CDD</a> | <a href="#">UniProt</a> | <a href="#">Pfam</a> | <a href="#">InterPro</a> |                |
| Ngar_c22000      | <a href="#">AFU59130</a> | putative response regulator receiver prot... | <a href="#">CDD</a> | <a href="#">UniProt</a> | <a href="#">Pfam</a> | <a href="#">InterPro</a> |                |
| Ngar_c22510      | <a href="#">AFU59181</a> | hypothetical protein Ngar_c22510 [Candida... | <a href="#">CDD</a> | <a href="#">UniProt</a> | <a href="#">Pfam</a> | <a href="#">InterPro</a> |                |
| Ngar_c24870      | <a href="#">AFU59409</a> | putative signal transduction response reg... | <a href="#">CDD</a> | <a href="#">UniProt</a> | <a href="#">Pfam</a> | <a href="#">InterPro</a> |                |
| Ngar_c25990      | <a href="#">AFU59521</a> | putative signal transduction response reg... | <a href="#">CDD</a> | <a href="#">UniProt</a> | <a href="#">Pfam</a> | <a href="#">InterPro</a> |                |
| Ngar_c26590      | <a href="#">AFU59580</a> | putative signal transduction response reg... | <a href="#">CDD</a> | <a href="#">UniProt</a> | <a href="#">Pfam</a> | <a href="#">InterPro</a> |                |
| Ngar_c27650      | <a href="#">AFU59686</a> | hypothetical protein Ngar_c27650 [Candida... | <a href="#">CDD</a> | <a href="#">UniProt</a> | <a href="#">Pfam</a> | <a href="#">InterPro</a> |                |
| Ngar_c28680      | <a href="#">AFU59787</a> | hypothetical protein Ngar_c28680 [Candida... | <a href="#">CDD</a> | <a href="#">UniProt</a> | <a href="#">Pfam</a> | <a href="#">InterPro</a> |                |
| Ngar_c28750      | <a href="#">AFU59794</a> | putative signal transduction response reg... | <a href="#">CDD</a> | <a href="#">UniProt</a> | <a href="#">Pfam</a> | <a href="#">InterPro</a> |                |
| Ngar_c28870      | <a href="#">AFU59806</a> | putative signal transduction response reg... | <a href="#">CDD</a> | <a href="#">UniProt</a> | <a href="#">Pfam</a> | <a href="#">InterPro</a> |                |
| Ngar_c28890      | <a href="#">AFU59808</a> | putative signal transduction response reg... | <a href="#">CDD</a> | <a href="#">UniProt</a> | <a href="#">Pfam</a> | <a href="#">InterPro</a> |                |
| Ngar_c33330      | <a href="#">AFU60248</a> | putative signal transduction response reg... | <a href="#">CDD</a> | <a href="#">UniProt</a> | <a href="#">Pfam</a> | <a href="#">InterPro</a> |                |
| Ngar_c33950      | <a href="#">AFU60310</a> | putative signal transduction response reg... | <a href="#">CDD</a> | <a href="#">UniProt</a> | <a href="#">Pfam</a> | <a href="#">InterPro</a> |                |
| *Ngar_c04310     | <a href="#">AFU57378</a> | hypothetical protein Ngar_c04310 [Candida... | <a href="#">CDD</a> | <a href="#">UniProt</a> | <a href="#">Pfam</a> | <a href="#">InterPro</a> |                |
| *Ngar_c04320     | <a href="#">AFU57379</a> | signal receiver domain-containing protein... | <a href="#">CDD</a> | <a href="#">UniProt</a> | <a href="#">Pfam</a> | <a href="#">InterPro</a> |                |
| *Ngar_c08390     | <a href="#">AFU57781</a> | putative response regulator receiver prot... | <a href="#">CDD</a> | <a href="#">UniProt</a> | <a href="#">Pfam</a> | <a href="#">InterPro</a> |                |
| *Ngar_c11730     | <a href="#">AFU58113</a> | putative short signal transduction respon... | <a href="#">CDD</a> | <a href="#">UniProt</a> | <a href="#">Pfam</a> | <a href="#">InterPro</a> |                |
| *Ngar_c12540     | <a href="#">AFU58194</a> | putative short signal transduction respon... | <a href="#">CDD</a> | <a href="#">UniProt</a> | <a href="#">Pfam</a> | <a href="#">InterPro</a> |                |
| *Ngar_c18900     | <a href="#">AFU58822</a> | response regulatory domain-containing pro... | <a href="#">CDD</a> | <a href="#">UniProt</a> | <a href="#">Pfam</a> | <a href="#">InterPro</a> |                |
| <b>REC-CheB</b>  |                          |                                              |                     |                         |                      |                          |                |
| Ngar_c10190      | <a href="#">AFU57961</a> | chemotaxis response regulator methylester... | <a href="#">CDD</a> | <a href="#">UniProt</a> | <a href="#">Pfam</a> | <a href="#">InterPro</a> |                |
| <b>Other RRs</b> |                          |                                              |                     |                         |                      |                          |                |
| Ngar_c08720      | <a href="#">AFU57814</a> | putative signal transduction response reg... | <a href="#">CDD</a> | <a href="#">UniProt</a> | <a href="#">Pfam</a> | <a href="#">InterPro</a> | (NitrOD3-REC)  |
| Ngar_c21520      | <a href="#">AFU59082</a> | putative signal transduction response reg... | <a href="#">CDD</a> | <a href="#">UniProt</a> | <a href="#">Pfam</a> | <a href="#">InterPro</a> |                |
| Ngar_c21780      | <a href="#">AFU59108</a> | hypothetical protein Ngar_c21780 [Candida... | <a href="#">CDD</a> | <a href="#">UniProt</a> | <a href="#">Pfam</a> | <a href="#">InterPro</a> | (MEDS-REC)     |
| Ngar_c27680      | <a href="#">AFU59689</a> | putative signal transduction response reg... | <a href="#">CDD</a> | <a href="#">UniProt</a> | <a href="#">Pfam</a> | <a href="#">InterPro</a> | (Ser-rich-REC) |
| Ngar_c33150      | <a href="#">AFU60230</a> | putative signal transduction response reg... | <a href="#">CDD</a> | <a href="#">UniProt</a> | <a href="#">Pfam</a> | <a href="#">InterPro</a> | (Ser-rich-REC) |
| *Ngar_c10040     | <a href="#">AFU57946</a> | putative response regulator receiver [Can... | <a href="#">CDD</a> | <a href="#">UniProt</a> | <a href="#">Pfam</a> | <a href="#">InterPro</a> |                |
| *Ngar_c33200     | <a href="#">AFU60235</a> | putative response regulator receiver [Can... | <a href="#">CDD</a> | <a href="#">UniProt</a> | <a href="#">Pfam</a> | <a href="#">InterPro</a> |                |

### Candidatus Nitrosotalea devanaterrea

#### **HisK, no REC**

|           |                          |                                               |                     |                         |                      |                          |  |
|-----------|--------------------------|-----------------------------------------------|---------------------|-------------------------|----------------------|--------------------------|--|
| NDEV_0432 | <a href="#">CUR51197</a> | putative Histidine kinase [Candidatus Nitr... | <a href="#">CDD</a> | <a href="#">UniProt</a> | <a href="#">Pfam</a> | <a href="#">InterPro</a> |  |
| NDEV_0725 | <a href="#">CUR51490</a> | putative Histidine kinase [Candidatus Nitr... | <a href="#">CDD</a> | <a href="#">UniProt</a> | <a href="#">Pfam</a> | <a href="#">InterPro</a> |  |
| NDEV_0741 | <a href="#">CUR51506</a> | ATPase/histidine kinase/DNA gyrase B/HSP90... | <a href="#">CDD</a> | <a href="#">UniProt</a> | <a href="#">Pfam</a> | <a href="#">InterPro</a> |  |
| NDEV_0999 | <a href="#">CUR51764</a> | Chemotaxis histidine kinase CheA [Candidat... | <a href="#">CDD</a> | <a href="#">UniProt</a> | <a href="#">Pfam</a> | <a href="#">InterPro</a> |  |
| NDEV_1007 | <a href="#">CUR51772</a> | putative Histidine kinase [Candidatus Nitr... | <a href="#">CDD</a> | <a href="#">UniProt</a> | <a href="#">Pfam</a> | <a href="#">InterPro</a> |  |
| NDEV_1010 | <a href="#">CUR51775</a> | putative Histidine kinase [Candidatus Nitr... | <a href="#">CDD</a> | <a href="#">UniProt</a> | <a href="#">Pfam</a> | <a href="#">InterPro</a> |  |
| NDEV_1385 | <a href="#">CUR52150</a> | putative Histidine kinase [Candidatus Nitr... | <a href="#">CDD</a> | <a href="#">UniProt</a> | <a href="#">Pfam</a> | <a href="#">InterPro</a> |  |
| NDEV_1408 | <a href="#">CUR52173</a> | Histidine kinase [Candidatus Nitrosotalea ... | <a href="#">CDD</a> | <a href="#">UniProt</a> | <a href="#">Pfam</a> | <a href="#">InterPro</a> |  |
| NDEV_1419 | <a href="#">CUR52184</a> | PAS domain S-box (modular protein) [Candid... | <a href="#">CDD</a> | <a href="#">UniProt</a> | <a href="#">Pfam</a> | <a href="#">InterPro</a> |  |
| NDEV_1454 | <a href="#">CUR52219</a> | Putative PAS/PAC sensor histidine kinase [... | <a href="#">CDD</a> | <a href="#">UniProt</a> | <a href="#">Pfam</a> | <a href="#">InterPro</a> |  |
| NDEV_1455 | <a href="#">CUR52220</a> | K+ channel signal transduction histidine k... | <a href="#">CDD</a> | <a href="#">UniProt</a> | <a href="#">Pfam</a> | <a href="#">InterPro</a> |  |
| NDEV_1499 | <a href="#">CUR52264</a> | Signal transduction histidine kinase, with... | <a href="#">CDD</a> | <a href="#">UniProt</a> | <a href="#">Pfam</a> | <a href="#">InterPro</a> |  |
| NDEV_1508 | <a href="#">CUR52273</a> | putative Histidine kinase [Candidatus Nitr... | <a href="#">CDD</a> | <a href="#">UniProt</a> | <a href="#">Pfam</a> | <a href="#">InterPro</a> |  |
| NDEV_1531 | <a href="#">CUR52296</a> | putative signal transduction histidine kin... | <a href="#">CDD</a> | <a href="#">UniProt</a> | <a href="#">Pfam</a> | <a href="#">InterPro</a> |  |
| NDEV_1535 | <a href="#">CUR52300</a> | putative Histidine kinase [Candidatus Nitr... | <a href="#">CDD</a> | <a href="#">UniProt</a> | <a href="#">Pfam</a> | <a href="#">InterPro</a> |  |
| NDEV_1571 | <a href="#">CUR52333</a> | putative Histidine kinase [Candidatus Nitr... | <a href="#">CDD</a> | <a href="#">UniProt</a> | <a href="#">Pfam</a> | <a href="#">InterPro</a> |  |
| NDEV_1706 | <a href="#">CUR52468</a> | Signal transduction histidine kinase [Cand... | <a href="#">CDD</a> | <a href="#">UniProt</a> | <a href="#">Pfam</a> | <a href="#">InterPro</a> |  |

|                  |                          |                                               |     |                         |                      |                          |                   |
|------------------|--------------------------|-----------------------------------------------|-----|-------------------------|----------------------|--------------------------|-------------------|
| NDEV_1717        | <a href="#">CUR52479</a> | Signal transduction histidine kinase [Cand... | CDD | <a href="#">UniProt</a> | <a href="#">Pfam</a> | <a href="#">InterPro</a> |                   |
| NDEV_1773        | <a href="#">CUR52535</a> | putative Histidine kinase [Candidatus Nitr... | CDD | <a href="#">UniProt</a> | <a href="#">Pfam</a> | <a href="#">InterPro</a> |                   |
| <b>REC only</b>  |                          |                                               |     |                         |                      |                          |                   |
| NDEV_0249        | <a href="#">CUR51014</a> | CheY-like receiver [Candidatus Nitrosotale... | CDD | <a href="#">UniProt</a> | <a href="#">Pfam</a> | <a href="#">InterPro</a> |                   |
| NDEV_0433        | <a href="#">CUR51198</a> | CheY-like receiver [Candidatus Nitrosotale... | CDD | <a href="#">UniProt</a> | <a href="#">Pfam</a> | <a href="#">InterPro</a> |                   |
| NDEV_0649        | <a href="#">CUR51414</a> | CheY-like receiver [Candidatus Nitrosotale... | CDD | <a href="#">UniProt</a> | <a href="#">Pfam</a> | <a href="#">InterPro</a> |                   |
| NDEV_0739        | <a href="#">CUR51504</a> | Chemotaxis protein CheY [Candidatus Nitro...  | CDD | <a href="#">UniProt</a> | <a href="#">Pfam</a> | <a href="#">InterPro</a> |                   |
| NDEV_0981        | <a href="#">CUR51746</a> | CheY-like receiver [Candidatus Nitrosotale... | CDD | <a href="#">UniProt</a> | <a href="#">Pfam</a> | <a href="#">InterPro</a> |                   |
| NDEV_0997        | <a href="#">CUR51762</a> | Chemotaxis response regulator CheY [Candid... | CDD | <a href="#">UniProt</a> | <a href="#">Pfam</a> | <a href="#">InterPro</a> |                   |
| NDEV_1002        | <a href="#">CUR51767</a> | Protein CcdB [Candidatus Nitrosotalea deva... | CDD | <a href="#">UniProt</a> | <a href="#">Pfam</a> | <a href="#">InterPro</a> |                   |
| NDEV_1009        | <a href="#">CUR51774</a> | Putative chemotaxis response regulator Che... | CDD | <a href="#">UniProt</a> | <a href="#">Pfam</a> | <a href="#">InterPro</a> |                   |
| NDEV_1011        | <a href="#">CUR51776</a> | CheY-like receiver [Candidatus Nitrosotale... | CDD | <a href="#">UniProt</a> | <a href="#">Pfam</a> | <a href="#">InterPro</a> |                   |
| NDEV_1012        | <a href="#">CUR51777</a> | CheY-like receiver [Candidatus Nitrosotale... | CDD | <a href="#">UniProt</a> | <a href="#">Pfam</a> | <a href="#">InterPro</a> |                   |
| NDEV_1015        | <a href="#">CUR51780</a> | CheY-like receiver [Candidatus Nitrosotale... | CDD | <a href="#">UniProt</a> | <a href="#">Pfam</a> | <a href="#">InterPro</a> |                   |
| NDEV_1076        | <a href="#">CUR51841</a> | CheY-like receiver [Candidatus Nitrosotale... | CDD | <a href="#">UniProt</a> | <a href="#">Pfam</a> | <a href="#">InterPro</a> |                   |
| NDEV_1395        | <a href="#">CUR52160</a> | CheY-like receiver [Candidatus Nitrosotale... | CDD | <a href="#">UniProt</a> | <a href="#">Pfam</a> | <a href="#">InterPro</a> |                   |
| NDEV_1422        | <a href="#">CUR52187</a> | CheY-like receiver [Candidatus Nitrosotale... | CDD | <a href="#">UniProt</a> | <a href="#">Pfam</a> | <a href="#">InterPro</a> |                   |
| NDEV_1457        | <a href="#">CUR52222</a> | K+ channel signal transduction response re... | CDD | <a href="#">UniProt</a> | <a href="#">Pfam</a> | <a href="#">InterPro</a> |                   |
| NDEV_1500        | <a href="#">CUR52265</a> | putative signal transduction response regu... | CDD | <a href="#">UniProt</a> | <a href="#">Pfam</a> | <a href="#">InterPro</a> |                   |
| <b>REC-CheB</b>  |                          |                                               |     |                         |                      |                          |                   |
| NDEV_0998        | <a href="#">CUR51763</a> | Chemotaxis response regulator protein-glut... | CDD | <a href="#">UniProt</a> | <a href="#">Pfam</a> | <a href="#">InterPro</a> |                   |
| <b>TPR-REC</b>   |                          |                                               |     |                         |                      |                          |                   |
| NDEV_0516        | <a href="#">CUR51281</a> | conserved protein of unknown function [Can... | CDD | <a href="#">UniProt</a> | <a href="#">Pfam</a> | <a href="#">InterPro</a> | (TPR-TPR-TPR-REC) |
| <b>Other RRs</b> |                          |                                               |     |                         |                      |                          |                   |
| NDEV_0738        | <a href="#">CUR51503</a> | conserved protein of unknown function [Can... | CDD | <a href="#">UniProt</a> | <a href="#">Pfam</a> | <a href="#">InterPro</a> | (REC-TackOD1)     |

#### Candidatus Nitrosotenuis cloacae strain SAT1

|                     |                          |                                              |     |                         |                      |                          |                   |
|---------------------|--------------------------|----------------------------------------------|-----|-------------------------|----------------------|--------------------------|-------------------|
| <b>HisK, no REC</b> |                          |                                              |     |                         |                      |                          |                   |
| SU86_000030         | <a href="#">AJZ76515</a> | hypothetical protein SU86_000030 [Candida... | CDD | <a href="#">UniProt</a> | <a href="#">Pfam</a> | <a href="#">InterPro</a> |                   |
| SU86_000945         | <a href="#">AJZ75188</a> | histidine kinase [Candidatus Nitrosotenui... | CDD | <a href="#">UniProt</a> | <a href="#">Pfam</a> | <a href="#">InterPro</a> |                   |
| SU86_001160         | <a href="#">AJZ75220</a> | hypothetical protein SU86_001160 [Candida... | CDD | <a href="#">UniProt</a> | <a href="#">Pfam</a> | <a href="#">InterPro</a> |                   |
| SU86_001735         | <a href="#">AJZ76557</a> | hypothetical protein SU86_001735 [Candida... | CDD | <a href="#">UniProt</a> | <a href="#">Pfam</a> | <a href="#">InterPro</a> |                   |
| SU86_001905         | <a href="#">AJZ76565</a> | hypothetical protein SU86_001905 [Candida... | CDD | <a href="#">UniProt</a> | <a href="#">Pfam</a> | <a href="#">InterPro</a> |                   |
| SU86_008670         | <a href="#">AJZ76744</a> | hypothetical protein SU86_008670 [Candida... | CDD | <a href="#">UniProt</a> | <a href="#">Pfam</a> | <a href="#">InterPro</a> |                   |
| <b>REC only</b>     |                          |                                              |     |                         |                      |                          |                   |
| SU86_002750         | <a href="#">AJZ76586</a> | hypothetical protein SU86_002750 [Candida... | CDD | <a href="#">UniProt</a> | <a href="#">Pfam</a> | <a href="#">InterPro</a> |                   |
| SU86_005490         | <a href="#">AJZ75909</a> | chemotaxis protein CheY [Candidatus Nitro... | CDD | <a href="#">UniProt</a> | <a href="#">Pfam</a> | <a href="#">InterPro</a> |                   |
| SU86_002825         | <a href="#">AJZ75489</a> | hypothetical protein SU86_002825 [Candida... | CDD | <a href="#">UniProt</a> | <a href="#">Pfam</a> | <a href="#">InterPro</a> |                   |
| SU86_002745         | <a href="#">AJZ75477</a> | chemotaxis protein CheY [Candidatus Nitro... | CDD | <a href="#">UniProt</a> | <a href="#">Pfam</a> | <a href="#">InterPro</a> |                   |
| SU86_002475         | <a href="#">AJZ75439</a> | hypothetical protein SU86_002475 [Candida... | CDD | <a href="#">UniProt</a> | <a href="#">Pfam</a> | <a href="#">InterPro</a> |                   |
| SU86_001625         | <a href="#">AJZ75300</a> | hypothetical protein SU86_001625 [Candida... | CDD | <a href="#">UniProt</a> | <a href="#">Pfam</a> | <a href="#">InterPro</a> |                   |
| SU86_001485         | <a href="#">AJZ75276</a> | chemotaxis protein CheY [Candidatus Nitro... | CDD | <a href="#">UniProt</a> | <a href="#">Pfam</a> | <a href="#">InterPro</a> |                   |
| SU86_000955         | <a href="#">AJZ75189</a> | chemotaxis protein CheY [Candidatus Nitro... | CDD | <a href="#">UniProt</a> | <a href="#">Pfam</a> | <a href="#">InterPro</a> |                   |
| SU86_000455         | <a href="#">AJZ75113</a> | histidine kinase [Candidatus Nitrosotenui... | CDD | <a href="#">UniProt</a> | <a href="#">Pfam</a> | <a href="#">InterPro</a> |                   |
| SU86_000325         | <a href="#">AJZ75092</a> | hypothetical protein SU86_000325 [Candida... | CDD | <a href="#">UniProt</a> | <a href="#">Pfam</a> | <a href="#">InterPro</a> |                   |
| SU86_001310         | <a href="#">AJZ75247</a> | hypothetical protein SU86_001310 [Candida... | CDD | <a href="#">UniProt</a> | <a href="#">Pfam</a> | <a href="#">InterPro</a> |                   |
| SU86_002590         | <a href="#">AJZ75453</a> | hypothetical protein SU86_002590 [Candida... | CDD | <a href="#">UniProt</a> | <a href="#">Pfam</a> | <a href="#">InterPro</a> |                   |
| <b>REC-CheB</b>     |                          |                                              |     |                         |                      |                          |                   |
| SU86_005520         | <a href="#">AJZ76668</a> | chemotaxis protein [Candidatus Nitrosoten... | CDD | <a href="#">UniProt</a> | <a href="#">Pfam</a> | <a href="#">InterPro</a> |                   |
| <b>TPR-REC</b>      |                          |                                              |     |                         |                      |                          |                   |
| SU86_003460         | <a href="#">AJZ75585</a> | hypothetical protein SU86_003460 [Candida... | CDD | <a href="#">UniProt</a> | <a href="#">Pfam</a> | <a href="#">InterPro</a> | (TPR-TPR-TPR-REC) |
| <b>Other RRs</b>    |                          |                                              |     |                         |                      |                          |                   |
| SU86_000960         | <a href="#">AJZ75190</a> | hypothetical protein SU86_000960 [Candida... | CDD | <a href="#">UniProt</a> | <a href="#">Pfam</a> | <a href="#">InterPro</a> | (REC-TackOD1)     |

#### Nitrosopumilus maritimus SCM1

|                     |                          |                                               |     |                         |                      |                          |  |
|---------------------|--------------------------|-----------------------------------------------|-----|-------------------------|----------------------|--------------------------|--|
| <b>HisK, no REC</b> |                          |                                               |     |                         |                      |                          |  |
| Nmar_0189           | <a href="#">ABX12085</a> | histidine kinase [Nitrosopumilus maritimus... | CDD | <a href="#">UniProt</a> | <a href="#">Pfam</a> | <a href="#">InterPro</a> |  |
| Nmar_0249           | <a href="#">ABX12145</a> | histidine kinase [Nitrosopumilus maritimus... | CDD | <a href="#">UniProt</a> | <a href="#">Pfam</a> | <a href="#">InterPro</a> |  |
| Nmar_0372           | <a href="#">ABX12268</a> | histidine kinase [Nitrosopumilus maritimus... | CDD | <a href="#">UniProt</a> | <a href="#">Pfam</a> | <a href="#">InterPro</a> |  |
| Nmar_0460           | <a href="#">ABX12356</a> | histidine kinase [Nitrosopumilus maritimus... | CDD | <a href="#">UniProt</a> | <a href="#">Pfam</a> | <a href="#">InterPro</a> |  |
| Nmar_0556           | <a href="#">ABX12452</a> | histidine kinase [Nitrosopumilus maritimus... | CDD | <a href="#">UniProt</a> | <a href="#">Pfam</a> | <a href="#">InterPro</a> |  |
| Nmar_0656           | <a href="#">ABX12552</a> | histidine kinase [Nitrosopumilus maritimus... | CDD | <a href="#">UniProt</a> | <a href="#">Pfam</a> | <a href="#">InterPro</a> |  |
| Nmar_0920           | <a href="#">ABX12816</a> | histidine kinase [Nitrosopumilus maritimus... | CDD | <a href="#">UniProt</a> | <a href="#">Pfam</a> | <a href="#">InterPro</a> |  |
| Nmar_1076           | <a href="#">ABX12972</a> | putative sensor with HAMP domain [Nitrosop... | CDD | <a href="#">UniProt</a> | <a href="#">Pfam</a> | <a href="#">InterPro</a> |  |
| Nmar_1207           | <a href="#">ABX13103</a> | histidine kinase [Nitrosopumilus maritimus... | CDD | <a href="#">UniProt</a> | <a href="#">Pfam</a> | <a href="#">InterPro</a> |  |
| Nmar_1247           | <a href="#">ABX13143</a> | histidine kinase [Nitrosopumilus maritimus... | CDD | <a href="#">UniProt</a> | <a href="#">Pfam</a> | <a href="#">InterPro</a> |  |
| Nmar_1299           | <a href="#">ABX13195</a> | PAS/PAC sensor signal transduction histidi... | CDD | <a href="#">UniProt</a> | <a href="#">Pfam</a> | <a href="#">InterPro</a> |  |
| Nmar_1440           | <a href="#">ABX13336</a> | histidine kinase [Nitrosopumilus maritimus... | CDD | <a href="#">UniProt</a> | <a href="#">Pfam</a> | <a href="#">InterPro</a> |  |
| <b>REC only</b>     |                          |                                               |     |                         |                      |                          |  |
| Nmar_0251           | <a href="#">ABX12147</a> | response regulator receiver protein [Nitro... | CDD | <a href="#">UniProt</a> | <a href="#">Pfam</a> | <a href="#">InterPro</a> |  |
| Nmar_0376           | <a href="#">ABX12272</a> | response regulator receiver protein [Nitro... | CDD | <a href="#">UniProt</a> | <a href="#">Pfam</a> | <a href="#">InterPro</a> |  |
| Nmar_0452           | <a href="#">ABX12348</a> | response regulator receiver protein [Nitro... | CDD | <a href="#">UniProt</a> | <a href="#">Pfam</a> | <a href="#">InterPro</a> |  |
| Nmar_0465           | <a href="#">ABX12361</a> | response regulator receiver protein [Nitro... | CDD | <a href="#">UniProt</a> | <a href="#">Pfam</a> | <a href="#">InterPro</a> |  |
| Nmar_1045           | <a href="#">ABX12941</a> | response regulator receiver protein [Nitro... | CDD | <a href="#">UniProt</a> | <a href="#">Pfam</a> | <a href="#">InterPro</a> |  |
| Nmar_1202           | <a href="#">ABX13098</a> | response regulator receiver protein [Nitro... | CDD | <a href="#">UniProt</a> | <a href="#">Pfam</a> | <a href="#">InterPro</a> |  |
| Nmar_1206           | <a href="#">ABX13102</a> | response regulator receiver protein [Nitro... | CDD | <a href="#">UniProt</a> | <a href="#">Pfam</a> | <a href="#">InterPro</a> |  |
| Nmar_1248           | <a href="#">ABX13144</a> | response regulator receiver protein [Nitro... | CDD | <a href="#">UniProt</a> | <a href="#">Pfam</a> | <a href="#">InterPro</a> |  |

|                  |                          |                                               |                     |                         |                      |                          |               |
|------------------|--------------------------|-----------------------------------------------|---------------------|-------------------------|----------------------|--------------------------|---------------|
| Nmar_1619        | <a href="#">ABX13515</a> | response regulator receiver protein [Nitro... | <a href="#">CDD</a> | <a href="#">UniProt</a> | <a href="#">Pfam</a> | <a href="#">InterPro</a> |               |
| <b>Other RRs</b> |                          |                                               |                     |                         |                      |                          |               |
| Nmar_0707        | <a href="#">ABX12603</a> | response regulator receiver protein [Nitro... | <a href="#">CDD</a> | <a href="#">UniProt</a> | <a href="#">Pfam</a> | <a href="#">InterPro</a> | (REC-NitrOD5) |

---

**Nitrososphaera viennensis EN76**

**HisK, no REC**

|             |                          |                                              |                     |                         |                      |                          |  |
|-------------|--------------------------|----------------------------------------------|---------------------|-------------------------|----------------------|--------------------------|--|
| NVIE_001040 | <a href="#">AIC14285</a> | putative membrane associated signal trans... | <a href="#">CDD</a> | <a href="#">UniProt</a> | <a href="#">Pfam</a> | <a href="#">InterPro</a> |  |
| NVIE_001570 | <a href="#">AIC14342</a> | putative membrane associated signal trans... | <a href="#">CDD</a> | <a href="#">UniProt</a> | <a href="#">Pfam</a> | <a href="#">InterPro</a> |  |
| NVIE_005590 | <a href="#">AIC14759</a> | putative membrane associated signal trans... | <a href="#">CDD</a> | <a href="#">UniProt</a> | <a href="#">Pfam</a> | <a href="#">InterPro</a> |  |
| NVIE_007400 | <a href="#">AIC14950</a> | putative membrane associated signal trans... | <a href="#">CDD</a> | <a href="#">UniProt</a> | <a href="#">Pfam</a> | <a href="#">InterPro</a> |  |
| NVIE_009870 | <a href="#">AIC15214</a> | chemotactic sensor histidine kinase CheA ... | <a href="#">CDD</a> | <a href="#">UniProt</a> | <a href="#">Pfam</a> | <a href="#">InterPro</a> |  |
| NVIE_015250 | <a href="#">AIC15771</a> | putative signal transduction histidine ki... | <a href="#">CDD</a> | <a href="#">UniProt</a> | <a href="#">Pfam</a> | <a href="#">InterPro</a> |  |
| NVIE_021310 | <a href="#">AIC16393</a> | putative membrane associated signal trans... | <a href="#">CDD</a> | <a href="#">UniProt</a> | <a href="#">Pfam</a> | <a href="#">InterPro</a> |  |
| NVIE_021340 | <a href="#">AIC16396</a> | putative membrane associated signal trans... | <a href="#">CDD</a> | <a href="#">UniProt</a> | <a href="#">Pfam</a> | <a href="#">InterPro</a> |  |
| NVIE_026350 | <a href="#">AIC16904</a> | putative membrane associated signal trans... | <a href="#">CDD</a> | <a href="#">UniProt</a> | <a href="#">Pfam</a> | <a href="#">InterPro</a> |  |
| NVIE_030060 | <a href="#">AIC17283</a> | putative signal transduction histidine ki... | <a href="#">CDD</a> | <a href="#">UniProt</a> | <a href="#">Pfam</a> | <a href="#">InterPro</a> |  |

**REC only**

|             |                          |                                              |                     |                         |                      |                          |  |
|-------------|--------------------------|----------------------------------------------|---------------------|-------------------------|----------------------|--------------------------|--|
| NVIE_015260 | <a href="#">AIC15772</a> | putative signal transduction response reg... | <a href="#">CDD</a> | <a href="#">UniProt</a> | <a href="#">Pfam</a> | <a href="#">InterPro</a> |  |
| NVIE_005580 | <a href="#">AIC14758</a> | putative CheY-like signal transduction re... | <a href="#">CDD</a> | <a href="#">UniProt</a> | <a href="#">Pfam</a> | <a href="#">InterPro</a> |  |
| NVIE_007410 | <a href="#">AIC14952</a> | putative signal transduction response reg... | <a href="#">CDD</a> | <a href="#">UniProt</a> | <a href="#">Pfam</a> | <a href="#">InterPro</a> |  |
| NVIE_026340 | <a href="#">AIC16903</a> | putative signal transduction response reg... | <a href="#">CDD</a> | <a href="#">UniProt</a> | <a href="#">Pfam</a> | <a href="#">InterPro</a> |  |
| NVIE_009850 | <a href="#">AIC15212</a> | chemotaxis response regulator CheY [Nitro... | <a href="#">CDD</a> | <a href="#">UniProt</a> | <a href="#">Pfam</a> | <a href="#">InterPro</a> |  |
| NVIE_021320 | <a href="#">AIC16394</a> | putative Polar-differentiation response r... | <a href="#">CDD</a> | <a href="#">UniProt</a> | <a href="#">Pfam</a> | <a href="#">InterPro</a> |  |
| NVIE_021330 | <a href="#">AIC16395</a> | putative signal transduction response reg... | <a href="#">CDD</a> | <a href="#">UniProt</a> | <a href="#">Pfam</a> | <a href="#">InterPro</a> |  |
| NVIE_020450 | <a href="#">AIC16303</a> | putative signal transduction response reg... | <a href="#">CDD</a> | <a href="#">UniProt</a> | <a href="#">Pfam</a> | <a href="#">InterPro</a> |  |

**REC-CheB**

|             |                          |                                              |                     |                         |                      |                          |  |
|-------------|--------------------------|----------------------------------------------|---------------------|-------------------------|----------------------|--------------------------|--|
| NVIE_009860 | <a href="#">AIC15213</a> | Chemotaxis response regulator protein [Ni... | <a href="#">CDD</a> | <a href="#">UniProt</a> | <a href="#">Pfam</a> | <a href="#">InterPro</a> |  |
|-------------|--------------------------|----------------------------------------------|---------------------|-------------------------|----------------------|--------------------------|--|

**wHTH-REC**

|             |                          |                                              |                     |                         |                      |                          |            |
|-------------|--------------------------|----------------------------------------------|---------------------|-------------------------|----------------------|--------------------------|------------|
| NVIE_030040 | <a href="#">AIC17281</a> | putative signal transduction response reg... | <a href="#">CDD</a> | <a href="#">UniProt</a> | <a href="#">Pfam</a> | <a href="#">InterPro</a> | (wHTH-REC) |
|-------------|--------------------------|----------------------------------------------|---------------------|-------------------------|----------------------|--------------------------|------------|

**Other RRs**

|           |                          |                                              |                     |                         |                      |                          |               |
|-----------|--------------------------|----------------------------------------------|---------------------|-------------------------|----------------------|--------------------------|---------------|
| NVIE_0132 | <a href="#">AIC14313</a> | putative signal transduction response reg... | <a href="#">CDD</a> | <a href="#">UniProt</a> | <a href="#">Pfam</a> | <a href="#">InterPro</a> | (NitrOD3-REC) |
|-----------|--------------------------|----------------------------------------------|---------------------|-------------------------|----------------------|--------------------------|---------------|

---

Please send corrections, questions and comments to [Michael Galperin](#)
