# Supplementary material for: Phyletic Distribution and Lineage-Specific Domain Architectures of Archaeal Two-Component Signal Transduction Systems
Source: PubMed Central journal article supplement (PMC5847659; doi:10.1128/jb.00681-17), 2018-03-12
Supplement: JB.00681-17_zjb999094653s3.pdf [file JB.00681-17_zjb999094653s3.pdf]

**Table S3. Histidine kinases and response regulators encoded in unfinished genomes of Archaea**

**Asgard group**

**Candidatus Lokiarchaeota**

|                                                                |                                                 |
|----------------------------------------------------------------|-------------------------------------------------|
| . <a href="#">Lokiarchaeum sp. GC14_75</a> .....               | <a href="#">65 HKs</a> , <a href="#">27 RRs</a> |
| . <a href="#">Candidatus Lokiarchaeota archaeon CR_4</a> ..... | <a href="#">26 HKs</a> , <a href="#">14 RRs</a> |

**Candidatus Heimdallarchaeota**

|                                                                      |                                                 |
|----------------------------------------------------------------------|-------------------------------------------------|
| . <a href="#">Candidatus Heimdallarchaeota archaeon AB_125</a> ..... | <a href="#">7 HKs</a> , <a href="#">4 RRs</a>   |
| . <a href="#">Candidatus Heimdallarchaeota archaeon LC_2</a> .....   | <a href="#">15 HKs</a> , <a href="#">23 RRs</a> |
| . <a href="#">Candidatus Heimdallarchaeota archaeon LC_3</a> .....   | <a href="#">31 HKs</a> , <a href="#">46 RRs</a> |

**Candidatus Odinararchaeota**

|                                                                   |        |
|-------------------------------------------------------------------|--------|
| . <a href="#">Candidatus Odinararchaeota archaeon LCB_4</a> ..... | 0 hits |
|-------------------------------------------------------------------|--------|

**Candidatus Thorarchaeota**

|                                                                    |                                                |
|--------------------------------------------------------------------|------------------------------------------------|
| . <a href="#">Candidatus Thorarchaeota archaeon AB_25</a> .....    | <a href="#">10 HKs</a> , <a href="#">6 RRs</a> |
| . <a href="#">Candidatus Thorarchaeota archaeon SMTZ-45</a> .....  | <a href="#">4 HKs</a> , <a href="#">2 RRs</a>  |
| . <a href="#">Candidatus Thorarchaeota archaeon SMTZ1-45</a> ..... | <a href="#">8 HKs</a> , <a href="#">6 RRs</a>  |
| . <a href="#">Candidatus Thorarchaeota archaeon SMTZ1-83</a> ..... | <a href="#">14 HKs</a> , <a href="#">5 RRs</a> |

**DPANN group**

**Candidatus Aenigmarchaeota**

|                                                                          |                                              |
|--------------------------------------------------------------------------|----------------------------------------------|
| . <a href="#">Candidatus Aenigmarchaeota archaeon CG1_02_38_14</a> ..... | <a href="#">1 HK</a> , <a href="#">3 RRs</a> |
|--------------------------------------------------------------------------|----------------------------------------------|

**Candidatus Micrarchaeota**

|                                                                        |                                              |
|------------------------------------------------------------------------|----------------------------------------------|
| . <a href="#">Candidatus Micrarchaeota archaeon CG1_02_55_22</a> ..... | <a href="#">1 HK</a> , <a href="#">1 RR</a>  |
| . <a href="#">Candidatus Micrarchaeota archaeon RBG_16_49_10</a> ..... | <a href="#">1 HK</a> , <a href="#">1 RR</a>  |
| . <a href="#">Candidatus Micrarchaeum acidiphilum ARMAN-1</a> .....    | <a href="#">1 HK</a> , <a href="#">1 RR</a>  |
| . <a href="#">Candidatus Micrarchaeum acidiphilum ARMAN-2</a> .....    | <a href="#">2 HKs</a> , <a href="#">1 RR</a> |
| . <a href="#">Candidatus Micrarchaeum sp. AZ1</a> .....                | <a href="#">0 HKs</a> , <a href="#">1 RR</a> |

**Candidatus Nanohaloarchaeota**

|                                                              |                                               |
|--------------------------------------------------------------|-----------------------------------------------|
| . <a href="#">Candidatus Nanosalina sp. J07AB43</a> .....    | <a href="#">1 HK</a> , <a href="#">3 RRs</a>  |
| . <a href="#">Candidatus Nanosalinarum sp. J07AB56</a> ..... | <a href="#">0 HKs</a> , <a href="#">1 RRs</a> |

**Candidatus Pacearchaeota**

|                                                                       |                                               |
|-----------------------------------------------------------------------|-----------------------------------------------|
| . <a href="#">Candidatus Pacearchaeota archaeon RBG_13_36_9</a> ..... | <a href="#">3 HKs</a> , <a href="#">6 RRs</a> |
| . <a href="#">Candidatus Pacearchaeota archaeon RBG_16_35_8</a> ..... | <a href="#">0 HKs</a> , <a href="#">1 RR</a>  |

**Candidatus Woesearchaeota**

|                                                                         |                                              |
|-------------------------------------------------------------------------|----------------------------------------------|
| . <a href="#">Candidatus Woesearchaeota archaeon CG1_02_57_44</a> ..... | <a href="#">3 HKs</a> , <a href="#">1 RR</a> |
|-------------------------------------------------------------------------|----------------------------------------------|

**TACK group**

**Candidatus Bathyarchaeota**

|                                                                          |                                               |
|--------------------------------------------------------------------------|-----------------------------------------------|
| . <a href="#">Candidatus Bathyarchaeota archaeon B26-1</a> .....         | <a href="#">0 HKs</a> , <a href="#">1 RR</a>  |
| . <a href="#">Candidatus Bathyarchaeota archaeon B26-2</a> .....         | <a href="#">0 HKs</a> , <a href="#">2 RRs</a> |
| . <a href="#">Candidatus Bathyarchaeota archaeon B63</a> .....           | <a href="#">0 HKs</a> , <a href="#">1 RR</a>  |
| . <a href="#">Candidatus Bathyarchaeota archaeon RBG_13_38_9</a> .....   | <a href="#">1 HK</a> , <a href="#">7 RRs</a>  |
| . <a href="#">Candidatus Bathyarchaeota archaeon RBG_13_46_16b</a> ..... | <a href="#">3 HKs</a> , <a href="#">5 RRs</a> |
| . <a href="#">Candidatus Bathyarchaeota archaeon RBG_13_52_12</a> .....  | <a href="#">4 HKs</a> , <a href="#">8 RRs</a> |
| . <a href="#">Candidatus Bathyarchaeota archaeon RBG_13_60_20</a> .....  | <a href="#">1 HKs</a> , <a href="#">6 RRs</a> |
| . <a href="#">Candidatus Bathyarchaeota archaeon RBG_16_48_13</a> .....  | <a href="#">1 HKs</a> , <a href="#">2 RRs</a> |
| . <a href="#">Candidatus Bathyarchaeota archaeon RBG_16_57_9</a> .....   | <a href="#">2 HKs</a> , <a href="#">6 RRs</a> |

**unclassified Crenarchaeota**

|                                                                             |                                               |
|-----------------------------------------------------------------------------|-----------------------------------------------|
| . <a href="#">Crenarchaeota archaeon 13_1_20CM_2_51_8</a> .....             | <a href="#">0 HKs</a> , <a href="#">6 RRs</a> |
| . <a href="#">Crenarchaeota archaeon 13_1_20CM_2_53_14</a> .....            | <a href="#">1 HK</a> , <a href="#">1 RR</a>   |
| . <a href="#">miscellaneous Crenarchaeota group archaeon SMTZ-80</a> .....  | <a href="#">0 HKs</a> , <a href="#">4 RRs</a> |
| . <a href="#">miscellaneous Crenarchaeota group archaeon SMTZ1-55</a> ..... | <a href="#">5 HKs</a> , <a href="#">3 RRs</a> |
| . <a href="#">miscellaneous Crenarchaeota group-6 archaeon AD8-1</a> .....  | <a href="#">1 HK</a> , <a href="#">1 RR</a>   |

**Asgard group**

**Candidatus Lokiarchaeota**

**Lokiarchaeum sp. GC14\_75**

HisK, no REC

|                |                          |                                           |                     |                         |                      |                          |
|----------------|--------------------------|-------------------------------------------|---------------------|-------------------------|----------------------|--------------------------|
| Lokiarch_00070 | <a href="#">KKK46579</a> | Signal transduction histidine kinase [... | <a href="#">CDD</a> | <a href="#">UniProt</a> | <a href="#">Pfam</a> | <a href="#">InterPro</a> |
| Lokiarch_00460 | <a href="#">KKK46537</a> | Signal transduction histidine kinase [... | <a href="#">CDD</a> | <a href="#">UniProt</a> | <a href="#">Pfam</a> | <a href="#">InterPro</a> |
| Lokiarch_00870 | <a href="#">KKK46428</a> | Signal transduction histidine kinase [... | <a href="#">CDD</a> | <a href="#">UniProt</a> | <a href="#">Pfam</a> | <a href="#">InterPro</a> |
| Lokiarch_01610 | <a href="#">KKK46402</a> | Signal transduction histidine kinase [... | <a href="#">CDD</a> | <a href="#">UniProt</a> | <a href="#">Pfam</a> | <a href="#">InterPro</a> |
| Lokiarch_01950 | <a href="#">KKK46363</a> | Signal transduction histidine kinase [... | <a href="#">CDD</a> | <a href="#">UniProt</a> | <a href="#">Pfam</a> | <a href="#">InterPro</a> |
| Lokiarch_02340 | <a href="#">KKK46292</a> | histidine kinase, partial [Lokiarchaeu... | <a href="#">CDD</a> | <a href="#">UniProt</a> | <a href="#">Pfam</a> | <a href="#">InterPro</a> |
| Lokiarch_02370 | <a href="#">KKK46295</a> | histidine kinase [Lokiarchaeum sp. GC1... | <a href="#">CDD</a> | <a href="#">UniProt</a> | <a href="#">Pfam</a> | <a href="#">InterPro</a> |
| Lokiarch_02430 | <a href="#">KKK46301</a> | Signal transduction histidine kinase [... | <a href="#">CDD</a> | <a href="#">UniProt</a> | <a href="#">Pfam</a> | <a href="#">InterPro</a> |
| Lokiarch_03510 | <a href="#">KKK46181</a> | Signal transduction histidine kinase [... | <a href="#">CDD</a> | <a href="#">UniProt</a> | <a href="#">Pfam</a> | <a href="#">InterPro</a> |
| Lokiarch_03590 | <a href="#">KKK46173</a> | Signal transduction histidine kinase [... | <a href="#">CDD</a> | <a href="#">UniProt</a> | <a href="#">Pfam</a> | <a href="#">InterPro</a> |
| Lokiarch_04650 | <a href="#">KKK46050</a> | Signal transduction histidine kinase, ... | <a href="#">CDD</a> | <a href="#">UniProt</a> | <a href="#">Pfam</a> | <a href="#">InterPro</a> |
| Lokiarch_05040 | <a href="#">KKK46003</a> | Signal transduction histidine kinase [... | <a href="#">CDD</a> | <a href="#">UniProt</a> | <a href="#">Pfam</a> | <a href="#">InterPro</a> |
| Lokiarch_05060 | <a href="#">KKK46005</a> | Signal transduction histidine kinase [... | <a href="#">CDD</a> | <a href="#">UniProt</a> | <a href="#">Pfam</a> | <a href="#">InterPro</a> |
| Lokiarch_05100 | <a href="#">KKK46009</a> | Signal transduction histidine kinase [... | <a href="#">CDD</a> | <a href="#">UniProt</a> | <a href="#">Pfam</a> | <a href="#">InterPro</a> |
| Lokiarch_05410 | <a href="#">KKK45954</a> | Signal transduction histidine kinase [... | <a href="#">CDD</a> | <a href="#">UniProt</a> | <a href="#">Pfam</a> | <a href="#">InterPro</a> |
| Lokiarch_05430 | <a href="#">KKK45956</a> | Signal transduction histidine kinase [... | <a href="#">CDD</a> | <a href="#">UniProt</a> | <a href="#">Pfam</a> | <a href="#">InterPro</a> |
| Lokiarch_07230 | <a href="#">KKK45741</a> | Signal transduction histidine kinase [... | <a href="#">CDD</a> | <a href="#">UniProt</a> | <a href="#">Pfam</a> | <a href="#">InterPro</a> |
| Lokiarch_07910 | <a href="#">KKK45664</a> | Signal transduction histidine kinase [... | <a href="#">CDD</a> | <a href="#">UniProt</a> | <a href="#">Pfam</a> | <a href="#">InterPro</a> |

|                  |                          |                                                   |     |                         |                      |                                               |  |
|------------------|--------------------------|---------------------------------------------------|-----|-------------------------|----------------------|-----------------------------------------------|--|
| Lokiarch_08320   | <a href="#">KKK45605</a> | Signal transduction histidine kinase, ...         | CDD | <a href="#">UniProt</a> | <a href="#">Pfam</a> | <a href="#">InterPro</a>                      |  |
| Lokiarch_08370   | <a href="#">KKK45609</a> | Signal transduction histidine kinase [...         | CDD | <a href="#">UniProt</a> | <a href="#">Pfam</a> | <a href="#">InterPro</a>                      |  |
| Lokiarch_09070   | <a href="#">KKK45532</a> | Signal transduction histidine kinase [...         | CDD | <a href="#">UniProt</a> | <a href="#">Pfam</a> | <a href="#">InterPro</a>                      |  |
| Lokiarch_09590   | <a href="#">KKK45479</a> | Signal transduction histidine kinase [...         | CDD | <a href="#">UniProt</a> | <a href="#">Pfam</a> | <a href="#">InterPro</a>                      |  |
| Lokiarch_12330   | <a href="#">KKK45149</a> | Signal transduction histidine kinase [...         | CDD | <a href="#">UniProt</a> | <a href="#">Pfam</a> | <a href="#">InterPro</a>                      |  |
| Lokiarch_12590   | <a href="#">KKK45111</a> | Signal transduction histidine kinase [...         | CDD | <a href="#">UniProt</a> | <a href="#">Pfam</a> | <a href="#">InterPro</a>                      |  |
| Lokiarch_14070   | <a href="#">KKK44935</a> | Signal transduction histidine kinase [...         | CDD | <a href="#">UniProt</a> | <a href="#">Pfam</a> | <a href="#">InterPro</a>                      |  |
| Lokiarch_14080   | <a href="#">KKK44936</a> | Signal transduction histidine kinase, ...         | CDD | <a href="#">UniProt</a> | <a href="#">Pfam</a> | <a href="#">InterPro</a>                      |  |
| Lokiarch_15000   | <a href="#">KKK44816</a> | Signal transduction histidine kinase, ...         | CDD | <a href="#">UniProt</a> | <a href="#">Pfam</a> | <a href="#">InterPro</a>                      |  |
| Lokiarch_18040   | <a href="#">KKK44457</a> | Signal transduction histidine kinase, ...         | CDD | <a href="#">UniProt</a> | <a href="#">Pfam</a> | <a href="#">InterPro</a>                      |  |
| Lokiarch_18550   | <a href="#">KKK44408</a> | Signal transduction histidine kinase [...         | CDD | <a href="#">UniProt</a> | <a href="#">Pfam</a> | <a href="#">InterPro</a>                      |  |
| Lokiarch_18860   | <a href="#">KKK44364</a> | Signal transduction histidine kinase [...         | CDD | <a href="#">UniProt</a> | <a href="#">Pfam</a> | <a href="#">InterPro</a>                      |  |
| Lokiarch_19330   | <a href="#">KKK44301</a> | Signal transduction histidine kinase [...         | CDD | <a href="#">UniProt</a> | <a href="#">Pfam</a> | <a href="#">InterPro</a>                      |  |
| Lokiarch_20000   | <a href="#">KKK44257</a> | Signal transduction histidine kinase [...         | CDD | <a href="#">UniProt</a> | <a href="#">Pfam</a> | <a href="#">InterPro</a>                      |  |
| Lokiarch_22330   | <a href="#">KKK43953</a> | Signal transduction histidine kinase [...         | CDD | <a href="#">UniProt</a> | <a href="#">Pfam</a> | <a href="#">InterPro</a>                      |  |
| Lokiarch_23340   | <a href="#">KKK43867</a> | Signal transduction histidine kinase [...         | CDD | <a href="#">UniProt</a> | <a href="#">Pfam</a> | <a href="#">InterPro</a>                      |  |
| Lokiarch_23480   | <a href="#">KKK43829</a> | Signal transduction histidine kinase [...         | CDD | <a href="#">UniProt</a> | <a href="#">Pfam</a> | <a href="#">InterPro</a>                      |  |
| Lokiarch_23540   | <a href="#">KKK43835</a> | Signal transduction histidine kinase [...         | CDD | <a href="#">UniProt</a> | <a href="#">Pfam</a> | <a href="#">InterPro</a>                      |  |
| Lokiarch_23560   | <a href="#">KKK43837</a> | Signal transduction histidine kinase [...         | CDD | <a href="#">UniProt</a> | <a href="#">Pfam</a> | <a href="#">InterPro</a>                      |  |
| Lokiarch_25620   | <a href="#">KKK43640</a> | Signal transduction histidine kinase, ...         | CDD | <a href="#">UniProt</a> | <a href="#">Pfam</a> | <a href="#">InterPro</a>                      |  |
| Lokiarch_25750   | <a href="#">KKK43591</a> | Signal transduction histidine kinase [...         | CDD | <a href="#">UniProt</a> | <a href="#">Pfam</a> | <a href="#">InterPro</a>                      |  |
| Lokiarch_28080   | <a href="#">KKK43304</a> | Signal transduction histidine kinase, ...         | CDD | <a href="#">UniProt</a> | <a href="#">Pfam</a> | <a href="#">InterPro</a>                      |  |
| Lokiarch_28410   | <a href="#">KKK43246</a> | Signal transduction histidine kinase [...         | CDD | <a href="#">UniProt</a> | <a href="#">Pfam</a> | <a href="#">InterPro</a>                      |  |
| Lokiarch_28650   | <a href="#">KKK43236</a> | Signal transduction histidine kinase [...         | CDD | <a href="#">UniProt</a> | <a href="#">Pfam</a> | <a href="#">InterPro</a>                      |  |
| Lokiarch_28900   | <a href="#">KKK43226</a> | Signal transduction histidine kinase [...         | CDD | <a href="#">UniProt</a> | <a href="#">Pfam</a> | <a href="#">InterPro</a>                      |  |
| Lokiarch_29610   | <a href="#">KKK43131</a> | Signal transduction histidine kinase [...         | CDD | <a href="#">UniProt</a> | <a href="#">Pfam</a> | <a href="#">InterPro</a>                      |  |
| Lokiarch_31540   | <a href="#">KKK42889</a> | Signal transduction histidine kinase [...         | CDD | <a href="#">UniProt</a> | <a href="#">Pfam</a> | <a href="#">InterPro</a>                      |  |
| Lokiarch_32010   | <a href="#">KKK42779</a> | Signal transduction histidine kinase, ...         | CDD | <a href="#">UniProt</a> | <a href="#">Pfam</a> | <a href="#">InterPro</a>                      |  |
| Lokiarch_32380   | <a href="#">KKK42815</a> | Chemotaxis protein CheA [Lokiarchaeum ...         | CDD | <a href="#">UniProt</a> | <a href="#">Pfam</a> | <a href="#">InterPro</a>                      |  |
| Lokiarch_37990   | <a href="#">KKK42045</a> | Signal transduction histidine kinase [...         | CDD | <a href="#">UniProt</a> | <a href="#">Pfam</a> | <a href="#">InterPro</a>                      |  |
| Lokiarch_39210   | <a href="#">KKK41896</a> | Signal transduction histidine kinase [...         | CDD | <a href="#">UniProt</a> | <a href="#">Pfam</a> | <a href="#">InterPro</a>                      |  |
| Lokiarch_39440   | <a href="#">KKK41869</a> | Signal transduction histidine kinase [...         | CDD | <a href="#">UniProt</a> | <a href="#">Pfam</a> | <a href="#">InterPro</a>                      |  |
| Lokiarch_41490   | <a href="#">KKK41609</a> | Signal transduction histidine kinase [...         | CDD | <a href="#">UniProt</a> | <a href="#">Pfam</a> | <a href="#">InterPro</a>                      |  |
| Lokiarch_41560   | <a href="#">KKK41616</a> | Signal transduction histidine kinase [...         | CDD | <a href="#">UniProt</a> | <a href="#">Pfam</a> | <a href="#">InterPro</a>                      |  |
| Lokiarch_42190   | <a href="#">KKK41530</a> | Signal transduction histidine kinase [...         | CDD | <a href="#">UniProt</a> | <a href="#">Pfam</a> | <a href="#">InterPro</a>                      |  |
| Lokiarch_43180   | <a href="#">KKK41384</a> | Signal transduction histidine kinase, ...         | CDD | <a href="#">UniProt</a> | <a href="#">Pfam</a> | <a href="#">InterPro</a>                      |  |
| Lokiarch_43190   | <a href="#">KKK41385</a> | Signal transduction histidine kinase [...         | CDD | <a href="#">UniProt</a> | <a href="#">Pfam</a> | <a href="#">InterPro</a>                      |  |
| Lokiarch_43950   | <a href="#">KKK41336</a> | Signal transduction histidine kinase [...         | CDD | <a href="#">UniProt</a> | <a href="#">Pfam</a> | <a href="#">InterPro</a>                      |  |
| Lokiarch_45820   | <a href="#">KKK41094</a> | Signal transduction histidine kinase [...         | CDD | <a href="#">UniProt</a> | <a href="#">Pfam</a> | <a href="#">InterPro</a>                      |  |
| Lokiarch_45830   | <a href="#">KKK41095</a> | Signal transduction histidine kinase [...         | CDD | <a href="#">UniProt</a> | <a href="#">Pfam</a> | <a href="#">InterPro</a>                      |  |
| Lokiarch_48050   | <a href="#">KKK40829</a> | Signal transduction histidine kinase [...         | CDD | <a href="#">UniProt</a> | <a href="#">Pfam</a> | <a href="#">InterPro</a>                      |  |
| Lokiarch_49130   | <a href="#">KKK40714</a> | Signal transduction histidine kinase, ...         | CDD | <a href="#">UniProt</a> | <a href="#">Pfam</a> | <a href="#">InterPro</a>                      |  |
| Lokiarch_50120   | <a href="#">KKK40577</a> | Signal transduction histidine kinase [...         | CDD | <a href="#">UniProt</a> | <a href="#">Pfam</a> | <a href="#">InterPro</a>                      |  |
| Lokiarch_51420   | <a href="#">KKK40441</a> | Signal transduction histidine kinase [...         | CDD | <a href="#">UniProt</a> | <a href="#">Pfam</a> | <a href="#">InterPro</a>                      |  |
| Lokiarch_51540   | <a href="#">KKK40437</a> | Signal transduction histidine kinase [...         | CDD | <a href="#">UniProt</a> | <a href="#">Pfam</a> | <a href="#">InterPro</a>                      |  |
| Lokiarch_52410   | <a href="#">KKK40347</a> | Signal transduction histidine kinase [...         | CDD | <a href="#">UniProt</a> | <a href="#">Pfam</a> | <a href="#">InterPro</a>                      |  |
| Lokiarch_53490   | <a href="#">KKK40193</a> | Signal transduction histidine kinase [...         | CDD | <a href="#">UniProt</a> | <a href="#">Pfam</a> | <a href="#">InterPro</a>                      |  |
| <b>REC only</b>  |                          |                                                   |     |                         |                      |                                               |  |
| Lokiarch_00080   | <a href="#">KKK46580</a> | Signal transduction response regulator...         | CDD | <a href="#">UniProt</a> | <a href="#">Pfam</a> | <a href="#">InterPro</a>                      |  |
| Lokiarch_00470   | <a href="#">KKK46538</a> | Signal transduction response regulator...         | CDD | <a href="#">UniProt</a> | <a href="#">Pfam</a> | <a href="#">InterPro</a>                      |  |
| Lokiarch_02270   | <a href="#">KKK46321</a> | Signal transduction response regulator...         | CDD | <a href="#">UniProt</a> | <a href="#">Pfam</a> | <a href="#">InterPro</a>                      |  |
| Lokiarch_04340   | <a href="#">KKK46073</a> | Signal transduction response regulator...         | CDD | <a href="#">UniProt</a> | <a href="#">Pfam</a> | <a href="#">InterPro</a>                      |  |
| Lokiarch_05420   | <a href="#">KKK45955</a> | Signal transduction response regulator...         | CDD | <a href="#">UniProt</a> | <a href="#">Pfam</a> | <a href="#">InterPro</a>                      |  |
| Lokiarch_08380   | <a href="#">KKK45610</a> | Signal transduction response regulator...         | CDD | <a href="#">UniProt</a> | <a href="#">Pfam</a> | <a href="#">InterPro</a>                      |  |
| Lokiarch_12580   | <a href="#">KKK45110</a> | Signal transduction response regulator...         | CDD | <a href="#">UniProt</a> | <a href="#">Pfam</a> | <a href="#">InterPro</a>                      |  |
| Lokiarch_15070   | <a href="#">KKK44823</a> | Signal transduction response regulator...         | CDD | <a href="#">UniProt</a> | <a href="#">Pfam</a> | <a href="#">InterPro</a>                      |  |
| Lokiarch_20950   | <a href="#">KKK44134</a> | Signal transduction response regulator...         | CDD | <a href="#">UniProt</a> | <a href="#">Pfam</a> | <a href="#">InterPro</a>                      |  |
| Lokiarch_22830   | <a href="#">KKK43941</a> | Signal transduction response regulator...         | CDD | <a href="#">UniProt</a> | <a href="#">Pfam</a> | <a href="#">InterPro</a>                      |  |
| Lokiarch_24680   | <a href="#">KKK43712</a> | Signal transduction response regulator...         | CDD | <a href="#">UniProt</a> | <a href="#">Pfam</a> | <a href="#">InterPro</a>                      |  |
| Lokiarch_32370   | <a href="#">KKK42814</a> | Chemotaxis protein CheY [Lokiarchaeum ...         | CDD | <a href="#">UniProt</a> | <a href="#">Pfam</a> | <a href="#">InterPro</a>                      |  |
| Lokiarch_32880   | <a href="#">KKK42744</a> | Signal transduction response regulator...         | CDD | <a href="#">UniProt</a> | <a href="#">Pfam</a> | <a href="#">InterPro</a>                      |  |
| Lokiarch_36940   | <a href="#">KKK42174</a> | Signal transduction response regulator...         | CDD | <a href="#">UniProt</a> | <a href="#">Pfam</a> | <a href="#">InterPro</a>                      |  |
| Lokiarch_37290   | <a href="#">KKK42141</a> | Signal transduction response regulator...         | CDD | <a href="#">UniProt</a> | <a href="#">Pfam</a> | <a href="#">InterPro</a>                      |  |
| Lokiarch_37560   | <a href="#">KKK42103</a> | Signal transduction response regulator...         | CDD | <a href="#">UniProt</a> | <a href="#">Pfam</a> | <a href="#">InterPro</a>                      |  |
| Lokiarch_39220   | <a href="#">KKK41897</a> | Signal transduction response regulator...         | CDD | <a href="#">UniProt</a> | <a href="#">Pfam</a> | <a href="#">InterPro</a>                      |  |
| Lokiarch_43970   | <a href="#">KKK41338</a> | Signal transduction response regulator...         | CDD | <a href="#">UniProt</a> | <a href="#">Pfam</a> | <a href="#">InterPro</a>                      |  |
| *Lokiarch_42390  | <a href="#">KKK41515</a> | Signal transduction response regulator...         | CDD | <a href="#">UniProt</a> | <a href="#">Pfam</a> | <a href="#">InterPro</a>                      |  |
| <b>REC-HisK</b>  |                          |                                                   |     |                         |                      |                                               |  |
| Lokiarch_29550   | <a href="#">KKK43125</a> | Signal transduction histidine kinase [...         | CDD | <a href="#">UniProt</a> | <a href="#">Pfam</a> | <a href="#">InterPro</a>                      |  |
| <b>REC-CheB</b>  |                          |                                                   |     |                         |                      |                                               |  |
| Lokiarch_16240   | <a href="#">KKK44677</a> | Signal transduction response regulator...         | CDD | <a href="#">UniProt</a> | <a href="#">Pfam</a> | <a href="#">InterPro</a>                      |  |
| Lokiarch_32440   | <a href="#">KKK42821</a> | Signal transduction response regulator...         | CDD | <a href="#">UniProt</a> | <a href="#">Pfam</a> | <a href="#">InterPro</a>                      |  |
| <b>Other RRs</b> |                          |                                                   |     |                         |                      |                                               |  |
| Lokiarch_05110   | <a href="#">KKK46010</a> | hypothetical protein Lokiarch_05110 [L...<br>REC) | CDD | <a href="#">UniProt</a> | <a href="#">Pfam</a> | <a href="#">InterPro</a> (RibbonHH-HisKA-REC) |  |
| Lokiarch_06650   | <a href="#">KKK45814</a> | Signal transduction response regulator...         | CDD | <a href="#">UniProt</a> | <a href="#">Pfam</a> | <a href="#">InterPro</a> (??-HisKA-REC)       |  |
| Lokiarch_07240   | <a href="#">KKK45742</a> | Signal transduction response regulator...         | CDD | <a href="#">UniProt</a> | <a href="#">Pfam</a> | <a href="#">InterPro</a> (RibbonHH-HisKA-REC) |  |

|                |                          |                                           |                     |                         |                      |                          |                      |
|----------------|--------------------------|-------------------------------------------|---------------------|-------------------------|----------------------|--------------------------|----------------------|
| Lokiarch_13560 | <a href="#">KKK44996</a> | Signal transduction response regulator... | <a href="#">CDD</a> | <a href="#">UniProt</a> | <a href="#">Pfam</a> | <a href="#">InterPro</a> | only in Loki,        |
| Heimdall       |                          |                                           |                     |                         |                      |                          |                      |
| Lokiarch_20350 | <a href="#">KKK44156</a> | Signal transduction response regulator... | <a href="#">CDD</a> | <a href="#">UniProt</a> | <a href="#">Pfam</a> | <a href="#">InterPro</a> | (RibbonHH-HisKA-REC) |
| Lokiarch_20360 | <a href="#">KKK44157</a> | Signal transduction response regulator... | <a href="#">CDD</a> | <a href="#">UniProt</a> | <a href="#">Pfam</a> | <a href="#">InterPro</a> | (RibbonHH-HisKA-REC) |
| Lokiarch_49480 | <a href="#">KKK40668</a> | Signal transduction response regulator... | <a href="#">CDD</a> | <a href="#">UniProt</a> | <a href="#">Pfam</a> | <a href="#">InterPro</a> | unique               |

#### Candidatus Lokiarchaeota archaeon CR 4

##### **HisK, no REC**

|                |                          |                                           |                     |                         |                      |                          |  |
|----------------|--------------------------|-------------------------------------------|---------------------|-------------------------|----------------------|--------------------------|--|
| RBG13Loki_0330 | <a href="#">OLS16050</a> | multi-sensor signal transduction histi... | <a href="#">CDD</a> | <a href="#">UniProt</a> | <a href="#">Pfam</a> | <a href="#">InterPro</a> |  |
| RBG13Loki_0480 | <a href="#">OLS15889</a> | sensory box protein [Candidatus Lokiar... | <a href="#">CDD</a> | <a href="#">UniProt</a> | <a href="#">Pfam</a> | <a href="#">InterPro</a> |  |
| RBG13Loki_0482 | <a href="#">OLS15891</a> | PAS domain S-box [Candidatus Lokiarcha... | <a href="#">CDD</a> | <a href="#">UniProt</a> | <a href="#">Pfam</a> | <a href="#">InterPro</a> |  |
| RBG13Loki_0546 | <a href="#">OLS15812</a> | CheA signal transduction histidine kin... | <a href="#">CDD</a> | <a href="#">UniProt</a> | <a href="#">Pfam</a> | <a href="#">InterPro</a> |  |
| RBG13Loki_0550 | <a href="#">OLS15816</a> | hypothetical protein RBG13Loki_0550 [C... | <a href="#">CDD</a> | <a href="#">UniProt</a> | <a href="#">Pfam</a> | <a href="#">InterPro</a> |  |
| RBG13Loki_0800 | <a href="#">OLS15572</a> | hybrid sensory histidine kinase BarA [... | <a href="#">CDD</a> | <a href="#">UniProt</a> | <a href="#">Pfam</a> | <a href="#">InterPro</a> |  |
| RBG13Loki_1041 | <a href="#">OLS15336</a> | integral membrane sensor signal transd... | <a href="#">CDD</a> | <a href="#">UniProt</a> | <a href="#">Pfam</a> | <a href="#">InterPro</a> |  |
| RBG13Loki_1711 | <a href="#">OLS14669</a> | phosphate sensor histidine kinase, HAM... | <a href="#">CDD</a> | <a href="#">UniProt</a> | <a href="#">Pfam</a> | <a href="#">InterPro</a> |  |
| RBG13Loki_1732 | <a href="#">OLS14630</a> | integral membrane sensor hybrid histid... | <a href="#">CDD</a> | <a href="#">UniProt</a> | <a href="#">Pfam</a> | <a href="#">InterPro</a> |  |
| RBG13Loki_1752 | <a href="#">OLS14650</a> | PAS/PAC sensor signal transduction his... | <a href="#">CDD</a> | <a href="#">UniProt</a> | <a href="#">Pfam</a> | <a href="#">InterPro</a> |  |
| RBG13Loki_1838 | <a href="#">OLS14555</a> | PAS domain S-box [Candidatus Lokiarcha... | <a href="#">CDD</a> | <a href="#">UniProt</a> | <a href="#">Pfam</a> | <a href="#">InterPro</a> |  |
| RBG13Loki_2731 | <a href="#">OLS13665</a> | sensory transduction histidine kinase ... | <a href="#">CDD</a> | <a href="#">UniProt</a> | <a href="#">Pfam</a> | <a href="#">InterPro</a> |  |
| RBG13Loki_2732 | <a href="#">OLS13666</a> | putative signal transduction histidine... | <a href="#">CDD</a> | <a href="#">UniProt</a> | <a href="#">Pfam</a> | <a href="#">InterPro</a> |  |
| RBG13Loki_3134 | <a href="#">OLS13260</a> | integral membrane sensor signal transd... | <a href="#">CDD</a> | <a href="#">UniProt</a> | <a href="#">Pfam</a> | <a href="#">InterPro</a> |  |
| RBG13Loki_3498 | <a href="#">OLS12863</a> | signal transduction histidine kinase [... | <a href="#">CDD</a> | <a href="#">UniProt</a> | <a href="#">Pfam</a> | <a href="#">InterPro</a> |  |
| RBG13Loki_3963 | <a href="#">OLS12427</a> | sensory box protein [Candidatus Lokiar... | <a href="#">CDD</a> | <a href="#">UniProt</a> | <a href="#">Pfam</a> | <a href="#">InterPro</a> |  |
| RBG13Loki_3964 | <a href="#">OLS12428</a> | PAS domain S-box [Candidatus Lokiarcha... | <a href="#">CDD</a> | <a href="#">UniProt</a> | <a href="#">Pfam</a> | <a href="#">InterPro</a> |  |
| RBG13Loki_4103 | <a href="#">OLS12280</a> | sensory transduction histidine kinase ... | <a href="#">CDD</a> | <a href="#">UniProt</a> | <a href="#">Pfam</a> | <a href="#">InterPro</a> |  |
| RBG13Loki_4106 | <a href="#">OLS12283</a> | multi-sensor signal transduction histi... | <a href="#">CDD</a> | <a href="#">UniProt</a> | <a href="#">Pfam</a> | <a href="#">InterPro</a> |  |
| RBG13Loki_4112 | <a href="#">OLS12289</a> | PAS/PAC sensor signal transduction his... | <a href="#">CDD</a> | <a href="#">UniProt</a> | <a href="#">Pfam</a> | <a href="#">InterPro</a> |  |
| RBG13Loki_4114 | <a href="#">OLS12291</a> | PAS/PAC sensor signal transduction his... | <a href="#">CDD</a> | <a href="#">UniProt</a> | <a href="#">Pfam</a> | <a href="#">InterPro</a> |  |
| RBG13Loki_4117 | <a href="#">OLS12294</a> | two component system histidine kinase ... | <a href="#">CDD</a> | <a href="#">UniProt</a> | <a href="#">Pfam</a> | <a href="#">InterPro</a> |  |
| RBG13Loki_4207 | <a href="#">OLS12141</a> | PAS/PAC sensor signal transduction his... | <a href="#">CDD</a> | <a href="#">UniProt</a> | <a href="#">Pfam</a> | <a href="#">InterPro</a> |  |
| RBG13Loki_4368 | <a href="#">OLS12024</a> | PAS/PAC sensor signal transduction his... | <a href="#">CDD</a> | <a href="#">UniProt</a> | <a href="#">Pfam</a> | <a href="#">InterPro</a> |  |
| RBG13Loki_4422 | <a href="#">OLS11967</a> | sensor histidine kinase protein [Candi... | <a href="#">CDD</a> | <a href="#">UniProt</a> | <a href="#">Pfam</a> | <a href="#">InterPro</a> |  |

##### **Other HisK**

|                |                          |                                           |                     |                         |                      |                          |  |
|----------------|--------------------------|-------------------------------------------|---------------------|-------------------------|----------------------|--------------------------|--|
| RBG13Loki_2516 | <a href="#">OLS13839</a> | sensory transduction histidine kinase ... | <a href="#">CDD</a> | <a href="#">UniProt</a> | <a href="#">Pfam</a> | <a href="#">InterPro</a> |  |
|----------------|--------------------------|-------------------------------------------|---------------------|-------------------------|----------------------|--------------------------|--|

##### **REC only**

|                |                          |                                           |                     |                         |                      |                          |  |
|----------------|--------------------------|-------------------------------------------|---------------------|-------------------------|----------------------|--------------------------|--|
| RBG13Loki_1918 | <a href="#">OLS14433</a> | response regulator receiver protein [C... | <a href="#">CDD</a> | <a href="#">UniProt</a> | <a href="#">Pfam</a> | <a href="#">InterPro</a> |  |
| RBG13Loki_4056 | <a href="#">OLS12406</a> | response regulator receiver protein [C... | <a href="#">CDD</a> | <a href="#">UniProt</a> | <a href="#">Pfam</a> | <a href="#">InterPro</a> |  |
| RBG13Loki_1919 | <a href="#">OLS14434</a> | response regulator receiver protein [C... | <a href="#">CDD</a> | <a href="#">UniProt</a> | <a href="#">Pfam</a> | <a href="#">InterPro</a> |  |
| RBG13Loki_2133 | <a href="#">OLS14257</a> | putative response regulator (CheY-like... | <a href="#">CDD</a> | <a href="#">UniProt</a> | <a href="#">Pfam</a> | <a href="#">InterPro</a> |  |
| RBG13Loki_4057 | <a href="#">OLS12407</a> | response regulator receiver protein [C... | <a href="#">CDD</a> | <a href="#">UniProt</a> | <a href="#">Pfam</a> | <a href="#">InterPro</a> |  |
| RBG13Loki_0147 | <a href="#">OLS16236</a> | two-component hybrid sensor and regula... | <a href="#">CDD</a> | <a href="#">UniProt</a> | <a href="#">Pfam</a> | <a href="#">InterPro</a> |  |
| RBG13Loki_0548 | <a href="#">OLS15814</a> | response regulator receiver protein [C... | <a href="#">CDD</a> | <a href="#">UniProt</a> | <a href="#">Pfam</a> | <a href="#">InterPro</a> |  |
| RBG13Loki_4290 | <a href="#">OLS12092</a> | component of chemotactic signal transd... | <a href="#">CDD</a> | <a href="#">UniProt</a> | <a href="#">Pfam</a> | <a href="#">InterPro</a> |  |
| RBG13Loki_1689 | <a href="#">OLS14688</a> | response regulator receiver [Candidatu... | <a href="#">CDD</a> | <a href="#">UniProt</a> | <a href="#">Pfam</a> | <a href="#">InterPro</a> |  |

##### **REC-HisK**

|                |                          |                                           |                     |                         |                      |                          |  |
|----------------|--------------------------|-------------------------------------------|---------------------|-------------------------|----------------------|--------------------------|--|
| RBG13Loki_1733 | <a href="#">OLS14631</a> | multisensor signal transduction histid... | <a href="#">CDD</a> | <a href="#">UniProt</a> | <a href="#">Pfam</a> | <a href="#">InterPro</a> |  |
|----------------|--------------------------|-------------------------------------------|---------------------|-------------------------|----------------------|--------------------------|--|

##### **REC-CheB**

|                |                          |                                           |                     |                         |                      |                          |  |
|----------------|--------------------------|-------------------------------------------|---------------------|-------------------------|----------------------|--------------------------|--|
| RBG13Loki_0547 | <a href="#">OLS15813</a> | response regulator receiver modulated ... | <a href="#">CDD</a> | <a href="#">UniProt</a> | <a href="#">Pfam</a> | <a href="#">InterPro</a> |  |
|----------------|--------------------------|-------------------------------------------|---------------------|-------------------------|----------------------|--------------------------|--|

##### **REC-PAS**

|                |                          |                                           |                     |                         |                      |                          |  |
|----------------|--------------------------|-------------------------------------------|---------------------|-------------------------|----------------------|--------------------------|--|
| RBG13Loki_4101 | <a href="#">OLS12278</a> | putative signaling protein [Candidatus... | <a href="#">CDD</a> | <a href="#">UniProt</a> | <a href="#">Pfam</a> | <a href="#">InterPro</a> |  |
|----------------|--------------------------|-------------------------------------------|---------------------|-------------------------|----------------------|--------------------------|--|

##### **Other RRs**

|                |                          |                                           |                     |                         |                      |                          |                |
|----------------|--------------------------|-------------------------------------------|---------------------|-------------------------|----------------------|--------------------------|----------------|
| RBG13Loki_1688 | <a href="#">OLS14687</a> | putative PAS/PAC sensor protein [Candi... | <a href="#">CDD</a> | <a href="#">UniProt</a> | <a href="#">Pfam</a> | <a href="#">InterPro</a> | (REC-PAS-wHTH) |
| RBG13Loki_1585 | <a href="#">OLS14826</a> | transcriptional regulatory protein [Ca... | <a href="#">CDD</a> | <a href="#">UniProt</a> | <a href="#">Pfam</a> | <a href="#">InterPro</a> |                |

#### Candidatus Heimdallarchaeota

##### Candidatus Heimdallarchaeota archaeon AB 125

##### **HisK, no REC**

|                 |                          |                                          |                     |                         |                      |                          |  |
|-----------------|--------------------------|------------------------------------------|---------------------|-------------------------|----------------------|--------------------------|--|
| HeimAB125_14200 | <a href="#">OLS31916</a> | Alkaline phosphatase synthesis sensor... | <a href="#">CDD</a> | <a href="#">UniProt</a> | <a href="#">Pfam</a> | <a href="#">InterPro</a> |  |
| HeimAB125_16760 | <a href="#">OLS31219</a> | Sensor histidine kinase TodS [Candida... | <a href="#">CDD</a> | <a href="#">UniProt</a> | <a href="#">Pfam</a> | <a href="#">InterPro</a> |  |
| HeimAB125_20900 | <a href="#">OLS29990</a> | Alginate biosynthesis sensor protein ... | <a href="#">CDD</a> | <a href="#">UniProt</a> | <a href="#">Pfam</a> | <a href="#">InterPro</a> |  |
| HeimAB125_17880 | <a href="#">OLS30870</a> | hypothetical protein HeimAB125_17880,... | <a href="#">CDD</a> | <a href="#">UniProt</a> | <a href="#">Pfam</a> | <a href="#">InterPro</a> |  |
| HeimAB125_11490 | <a href="#">OLS32185</a> | hypothetical protein HeimAB125_11490 ... | <a href="#">CDD</a> | <a href="#">UniProt</a> | <a href="#">Pfam</a> | <a href="#">InterPro</a> |  |
| HeimAB125_20520 | <a href="#">OLS30112</a> | hypothetical protein HeimAB125_20520,... | <a href="#">CDD</a> | <a href="#">UniProt</a> | <a href="#">Pfam</a> | <a href="#">InterPro</a> |  |

##### **Hybrid HisK**

|                 |                          |                                          |                     |                         |                      |                          |  |
|-----------------|--------------------------|------------------------------------------|---------------------|-------------------------|----------------------|--------------------------|--|
| HeimAB125_12030 | <a href="#">OLS32128</a> | Blue-light-activated protein [Candida... | <a href="#">CDD</a> | <a href="#">UniProt</a> | <a href="#">Pfam</a> | <a href="#">InterPro</a> |  |
|-----------------|--------------------------|------------------------------------------|---------------------|-------------------------|----------------------|--------------------------|--|

##### **REC only**

|                 |                          |                                          |                     |                         |                      |                          |  |
|-----------------|--------------------------|------------------------------------------|---------------------|-------------------------|----------------------|--------------------------|--|
| HeimAB125_14190 | <a href="#">OLS31915</a> | Chemotaxis protein CheY [Candidatus H... | <a href="#">CDD</a> | <a href="#">UniProt</a> | <a href="#">Pfam</a> | <a href="#">InterPro</a> |  |
| HeimAB125_22250 | <a href="#">OLS29525</a> | Transcriptional regulatory protein Yy... | <a href="#">CDD</a> | <a href="#">UniProt</a> | <a href="#">Pfam</a> | <a href="#">InterPro</a> |  |

##### **Other RRs**

|                 |                          |                                          |                     |                         |                      |                          |            |
|-----------------|--------------------------|------------------------------------------|---------------------|-------------------------|----------------------|--------------------------|------------|
| HeimAB125_05440 | <a href="#">OLS32769</a> | hypothetical protein HeimAB125_05440 ... | <a href="#">CDD</a> | <a href="#">UniProt</a> | <a href="#">Pfam</a> | <a href="#">InterPro</a> | (REC-PPDK) |
|-----------------|--------------------------|------------------------------------------|---------------------|-------------------------|----------------------|--------------------------|------------|

#### Candidatus Heimdallarchaeota archaeon LC 2

**HisK, no REC**

|              |                          |                                             |                     |                         |                      |                          |
|--------------|--------------------------|---------------------------------------------|---------------------|-------------------------|----------------------|--------------------------|
| HeimC2_15810 | <a href="#">OLS26337</a> | Nitrogen regulation protein NR(II), part... | <a href="#">CDD</a> | <a href="#">UniProt</a> | <a href="#">Pfam</a> | <a href="#">InterPro</a> |
| HeimC2_01450 | <a href="#">OLS29297</a> | Sensor protein ZraS [Candidatus Heimdall... | <a href="#">CDD</a> | <a href="#">UniProt</a> | <a href="#">Pfam</a> | <a href="#">InterPro</a> |
| HeimC2_34180 | <a href="#">OLS21200</a> | Sensor protein kinase Walk [Candidatus H... | <a href="#">CDD</a> | <a href="#">UniProt</a> | <a href="#">Pfam</a> | <a href="#">InterPro</a> |
| HeimC2_19620 | <a href="#">OLS25286</a> | hypothetical protein HeimC2_19620, parti... | <a href="#">CDD</a> | <a href="#">UniProt</a> | <a href="#">Pfam</a> | <a href="#">InterPro</a> |
| HeimC2_45130 | <a href="#">OLS17060</a> | Chemotaxis protein CheA [Candidatus Heim... | <a href="#">CDD</a> | <a href="#">UniProt</a> | <a href="#">Pfam</a> | <a href="#">InterPro</a> |
| HeimC2_12630 | <a href="#">OLS27153</a> | Chemotaxis protein CheA [Candidatus Heim... | <a href="#">CDD</a> | <a href="#">UniProt</a> | <a href="#">Pfam</a> | <a href="#">InterPro</a> |

**Hybrid HisK**

|              |                          |                                                     |                     |                         |                      |                          |                    |
|--------------|--------------------------|-----------------------------------------------------|---------------------|-------------------------|----------------------|--------------------------|--------------------|
| HeimC2_01230 | <a href="#">OLS29276</a> | Blue-light-activated protein [Candidatus...<br>REC) | <a href="#">CDD</a> | <a href="#">UniProt</a> | <a href="#">Pfam</a> | <a href="#">InterPro</a> | (PAS-PAS-HisK-REC) |
| HeimC2_08310 | <a href="#">OLS28176</a> | Sporulation kinase E [Candidatus Heimdall...        | <a href="#">CDD</a> | <a href="#">UniProt</a> | <a href="#">Pfam</a> | <a href="#">InterPro</a> |                    |
| HeimC2_23060 | <a href="#">OLS24360</a> | Blue-light-activated protein [Candidatus...<br>REC) | <a href="#">CDD</a> | <a href="#">UniProt</a> | <a href="#">Pfam</a> | <a href="#">InterPro</a> | (PAS-PAS-HisK-REC) |
| HeimC2_36150 | <a href="#">OLS20714</a> | Blue-light-activated protein [Candidatus...<br>REC) | <a href="#">CDD</a> | <a href="#">UniProt</a> | <a href="#">Pfam</a> | <a href="#">InterPro</a> | (CHASE-HisK-REC)   |
| HeimC2_45040 | <a href="#">OLS17051</a> | Blue-light-activated protein [Candidatus...<br>REC) | <a href="#">CDD</a> | <a href="#">UniProt</a> | <a href="#">Pfam</a> | <a href="#">InterPro</a> | (PAS-PAS-HisK-REC) |
| HeimC2_45180 | <a href="#">OLS17065</a> | Blue-light-activated protein [Candidatus...<br>REC) | <a href="#">CDD</a> | <a href="#">UniProt</a> | <a href="#">Pfam</a> | <a href="#">InterPro</a> | (PAS-PAS-HisK-REC) |
| HeimC2_45200 | <a href="#">OLS17067</a> | Sensor protein FixL [Candidatus Heimdall...         | <a href="#">CDD</a> | <a href="#">UniProt</a> | <a href="#">Pfam</a> | <a href="#">InterPro</a> |                    |
| HeimC2_45220 | <a href="#">OLS17069</a> | Blue-light-activated protein [Candidatus...<br>REC) | <a href="#">CDD</a> | <a href="#">UniProt</a> | <a href="#">Pfam</a> | <a href="#">InterPro</a> |                    |
| HeimC2_45230 | <a href="#">OLS17070</a> | Sensor protein ZraS [Candidatus Heimdall...         | <a href="#">CDD</a> | <a href="#">UniProt</a> | <a href="#">Pfam</a> | <a href="#">InterPro</a> |                    |

**REC only**

|              |                          |                                             |                     |                         |                      |                          |
|--------------|--------------------------|---------------------------------------------|---------------------|-------------------------|----------------------|--------------------------|
| HeimC2_27350 | <a href="#">OLS23182</a> | Chemotaxis protein CheY [Candidatus Heim... | <a href="#">CDD</a> | <a href="#">UniProt</a> | <a href="#">Pfam</a> | <a href="#">InterPro</a> |
| HeimC2_44360 | <a href="#">OLS18434</a> | Chemotaxis protein CheY [Candidatus Heim... | <a href="#">CDD</a> | <a href="#">UniProt</a> | <a href="#">Pfam</a> | <a href="#">InterPro</a> |
| HeimC2_32290 | <a href="#">OLS21770</a> | Chemotaxis protein CheY [Candidatus Heim... | <a href="#">CDD</a> | <a href="#">UniProt</a> | <a href="#">Pfam</a> | <a href="#">InterPro</a> |
| HeimC2_45120 | <a href="#">OLS17059</a> | Chemotaxis protein CheY [Candidatus Heim... | <a href="#">CDD</a> | <a href="#">UniProt</a> | <a href="#">Pfam</a> | <a href="#">InterPro</a> |
| HeimC2_44340 | <a href="#">OLS18432</a> | Chemotaxis protein CheY [Candidatus Heim... | <a href="#">CDD</a> | <a href="#">UniProt</a> | <a href="#">Pfam</a> | <a href="#">InterPro</a> |
| HeimC2_41320 | <a href="#">OLS19452</a> | hypothetical protein HeimC2_41320 [Candi... | <a href="#">CDD</a> | <a href="#">UniProt</a> | <a href="#">Pfam</a> | <a href="#">InterPro</a> |

**REC-CheB**

|              |                          |                                             |                     |                         |                      |                          |
|--------------|--------------------------|---------------------------------------------|---------------------|-------------------------|----------------------|--------------------------|
| HeimC2_12600 | <a href="#">OLS27150</a> | Chemotaxis response regulator protein-gl... | <a href="#">CDD</a> | <a href="#">UniProt</a> | <a href="#">Pfam</a> | <a href="#">InterPro</a> |
| HeimC2_45160 | <a href="#">OLS17063</a> | Chemotaxis response regulator protein-gl... | <a href="#">CDD</a> | <a href="#">UniProt</a> | <a href="#">Pfam</a> | <a href="#">InterPro</a> |

**Other RRs**

|              |                          |                                                           |                     |                         |                      |                          |                   |
|--------------|--------------------------|-----------------------------------------------------------|---------------------|-------------------------|----------------------|--------------------------|-------------------|
| HeimC2_01350 | <a href="#">OLS29287</a> | KDP operon transcriptional regulatory pr...               | <a href="#">CDD</a> | <a href="#">UniProt</a> | <a href="#">Pfam</a> | <a href="#">InterPro</a> |                   |
| HeimC2_04740 | <a href="#">OLS28744</a> | hypothetical protein HeimC2_04740 [Candi...               | <a href="#">CDD</a> | <a href="#">UniProt</a> | <a href="#">Pfam</a> | <a href="#">InterPro</a> |                   |
| HeimC2_10410 | <a href="#">OLS27845</a> | hypothetical protein HeimC2_10410 [Candi...               | <a href="#">CDD</a> | <a href="#">UniProt</a> | <a href="#">Pfam</a> | <a href="#">InterPro</a> |                   |
| HeimC2_10910 | <a href="#">OLS27643</a> | hypothetical protein HeimC2_10910 [Candi...               | <a href="#">CDD</a> | <a href="#">UniProt</a> | <a href="#">Pfam</a> | <a href="#">InterPro</a> |                   |
| HeimC2_11830 | <a href="#">OLS27346</a> | hypothetical protein HeimC2_11830 [Candi...               | <a href="#">CDD</a> | <a href="#">UniProt</a> | <a href="#">Pfam</a> | <a href="#">InterPro</a> | (REC-PPDK)        |
| HeimC2_12440 | <a href="#">OLS27252</a> | Chemotaxis response regulator protein-gl...               | <a href="#">CDD</a> | <a href="#">UniProt</a> | <a href="#">Pfam</a> | <a href="#">InterPro</a> |                   |
| HeimC2_12450 | <a href="#">OLS27253</a> | Transcriptional regulatory protein SrrA ...               | <a href="#">CDD</a> | <a href="#">UniProt</a> | <a href="#">Pfam</a> | <a href="#">InterPro</a> |                   |
| HeimC2_15800 | <a href="#">OLS26336</a> | Thioredoxin reductase [Candidatus Heimda...<br>reductase) | <a href="#">CDD</a> | <a href="#">UniProt</a> | <a href="#">Pfam</a> | <a href="#">InterPro</a> | (REC-Thioredoxin) |
| HeimC2_16010 | <a href="#">OLS26189</a> | hypothetical protein HeimC2_16010 [Candi...               | <a href="#">CDD</a> | <a href="#">UniProt</a> | <a href="#">Pfam</a> | <a href="#">InterPro</a> |                   |
| HeimC2_24580 | <a href="#">OLS23943</a> | Chemotaxis protein CheY [Candidatus Heim...               | <a href="#">CDD</a> | <a href="#">UniProt</a> | <a href="#">Pfam</a> | <a href="#">InterPro</a> |                   |
| HeimC2_25020 | <a href="#">OLS23763</a> | hypothetical protein HeimC2_25020 [Candi...               | <a href="#">CDD</a> | <a href="#">UniProt</a> | <a href="#">Pfam</a> | <a href="#">InterPro</a> |                   |
| HeimC2_26340 | <a href="#">OLS23430</a> | Chemotaxis protein CheY [Candidatus Heim...               | <a href="#">CDD</a> | <a href="#">UniProt</a> | <a href="#">Pfam</a> | <a href="#">InterPro</a> |                   |
| HeimC2_30070 | <a href="#">OLS22308</a> | hypothetical protein HeimC2_30070 [Candi...               | <a href="#">CDD</a> | <a href="#">UniProt</a> | <a href="#">Pfam</a> | <a href="#">InterPro</a> |                   |
| HeimC2_34170 | <a href="#">OLS21199</a> | hypothetical protein HeimC2_34170 [Candi...               | <a href="#">CDD</a> | <a href="#">UniProt</a> | <a href="#">Pfam</a> | <a href="#">InterPro</a> |                   |
| HeimC2_45210 | <a href="#">OLS17068</a> | Hydrogenase transcriptional regulatory p...               | <a href="#">CDD</a> | <a href="#">UniProt</a> | <a href="#">Pfam</a> | <a href="#">InterPro</a> |                   |

**Candidatus Heimdallarchaeota archaeon LC\_3****HisK, no REC**

|              |                          |                                              |                     |                         |                      |                          |
|--------------|--------------------------|----------------------------------------------|---------------------|-------------------------|----------------------|--------------------------|
| HeimC3_02430 | <a href="#">OLS27666</a> | Adaptive-response sensory-kinase SasA [C...  | <a href="#">CDD</a> | <a href="#">UniProt</a> | <a href="#">Pfam</a> | <a href="#">InterPro</a> |
| HeimC3_04220 | <a href="#">OLS27423</a> | putative sensor histidine kinase TcrY [C...  | <a href="#">CDD</a> | <a href="#">UniProt</a> | <a href="#">Pfam</a> | <a href="#">InterPro</a> |
| HeimC3_05810 | <a href="#">OLS27114</a> | Phytochrome-like protein cph1 [Candidatu...  | <a href="#">CDD</a> | <a href="#">UniProt</a> | <a href="#">Pfam</a> | <a href="#">InterPro</a> |
| HeimC3_06810 | <a href="#">OLS26789</a> | Osmolarity sensor protein EnvZ [Candidat...  | <a href="#">CDD</a> | <a href="#">UniProt</a> | <a href="#">Pfam</a> | <a href="#">InterPro</a> |
| HeimC3_08490 | <a href="#">OLS26530</a> | putative sensor histidine kinase TcrY [C...  | <a href="#">CDD</a> | <a href="#">UniProt</a> | <a href="#">Pfam</a> | <a href="#">InterPro</a> |
| HeimC3_08940 | <a href="#">OLS26575</a> | Sensor protein KdpD [Candidatus Heimdall...  | <a href="#">CDD</a> | <a href="#">UniProt</a> | <a href="#">Pfam</a> | <a href="#">InterPro</a> |
| HeimC3_09130 | <a href="#">OLS26363</a> | Sensor histidine kinase TmoS [Candidatus...  | <a href="#">CDD</a> | <a href="#">UniProt</a> | <a href="#">Pfam</a> | <a href="#">InterPro</a> |
| HeimC3_13240 | <a href="#">OLS25745</a> | putative sensor histidine kinase TcrY [C...  | <a href="#">CDD</a> | <a href="#">UniProt</a> | <a href="#">Pfam</a> | <a href="#">InterPro</a> |
| HeimC3_13930 | <a href="#">OLS25645</a> | Sporulation kinase E [Candidatus Heimdall... | <a href="#">CDD</a> | <a href="#">UniProt</a> | <a href="#">Pfam</a> | <a href="#">InterPro</a> |
| HeimC3_14280 | <a href="#">OLS25680</a> | Adaptive-response sensory-kinase SasA [C...  | <a href="#">CDD</a> | <a href="#">UniProt</a> | <a href="#">Pfam</a> | <a href="#">InterPro</a> |
| HeimC3_16290 | <a href="#">OLS25185</a> | Sensor protein KdpD [Candidatus Heimdall...  | <a href="#">CDD</a> | <a href="#">UniProt</a> | <a href="#">Pfam</a> | <a href="#">InterPro</a> |
| HeimC3_16410 | <a href="#">OLS25197</a> | Alkaline phosphatase synthesis sensor pr...  | <a href="#">CDD</a> | <a href="#">UniProt</a> | <a href="#">Pfam</a> | <a href="#">InterPro</a> |
| HeimC3_19410 | <a href="#">OLS24511</a> | Globin-coupled histidine kinase [Candida...  | <a href="#">CDD</a> | <a href="#">UniProt</a> | <a href="#">Pfam</a> | <a href="#">InterPro</a> |
| HeimC3_19630 | <a href="#">OLS24533</a> | Sensor protein ZraS [Candidatus Heimdall...  | <a href="#">CDD</a> | <a href="#">UniProt</a> | <a href="#">Pfam</a> | <a href="#">InterPro</a> |
| HeimC3_20510 | <a href="#">OLS24333</a> | Alkaline phosphatase synthesis sensor pr...  | <a href="#">CDD</a> | <a href="#">UniProt</a> | <a href="#">Pfam</a> | <a href="#">InterPro</a> |
| HeimC3_22890 | <a href="#">OLS23817</a> | Sensor protein ZraS [Candidatus Heimdall...  | <a href="#">CDD</a> | <a href="#">UniProt</a> | <a href="#">Pfam</a> | <a href="#">InterPro</a> |
| HeimC3_22910 | <a href="#">OLS23819</a> | Sensor protein ZraS [Candidatus Heimdall...  | <a href="#">CDD</a> | <a href="#">UniProt</a> | <a href="#">Pfam</a> | <a href="#">InterPro</a> |
| HeimC3_24300 | <a href="#">OLS23618</a> | putative sensor histidine kinase TcrY [C...  | <a href="#">CDD</a> | <a href="#">UniProt</a> | <a href="#">Pfam</a> | <a href="#">InterPro</a> |
| HeimC3_25250 | <a href="#">OLS23361</a> | Alkaline phosphatase synthesis sensor pr...  | <a href="#">CDD</a> | <a href="#">UniProt</a> | <a href="#">Pfam</a> | <a href="#">InterPro</a> |
| HeimC3_34540 | <a href="#">OLS21607</a> | Alkaline phosphatase synthesis sensor pr...  | <a href="#">CDD</a> | <a href="#">UniProt</a> | <a href="#">Pfam</a> | <a href="#">InterPro</a> |
| HeimC3_34830 | <a href="#">OLS21574</a> | Alkaline phosphatase synthesis sensor pr...  | <a href="#">CDD</a> | <a href="#">UniProt</a> | <a href="#">Pfam</a> | <a href="#">InterPro</a> |
| HeimC3_37340 | <a href="#">OLS21087</a> | Alkaline phosphatase synthesis sensor pr...  | <a href="#">CDD</a> | <a href="#">UniProt</a> | <a href="#">Pfam</a> | <a href="#">InterPro</a> |
| HeimC3_38260 | <a href="#">OLS20915</a> | Sensor protein ZraS [Candidatus Heimdall...  | <a href="#">CDD</a> | <a href="#">UniProt</a> | <a href="#">Pfam</a> | <a href="#">InterPro</a> |
| HeimC3_39970 | <a href="#">OLS20539</a> | Sensor protein KdpD [Candidatus Heimdall...  | <a href="#">CDD</a> | <a href="#">UniProt</a> | <a href="#">Pfam</a> | <a href="#">InterPro</a> |
| HeimC3_42490 | <a href="#">OLS20038</a> | Sensor protein ZraS [Candidatus Heimdall...  | <a href="#">CDD</a> | <a href="#">UniProt</a> | <a href="#">Pfam</a> | <a href="#">InterPro</a> |
| HeimC3_44250 | <a href="#">OLS19662</a> | Nitrogen fixation regulatory protein [Ca...  | <a href="#">CDD</a> | <a href="#">UniProt</a> | <a href="#">Pfam</a> | <a href="#">InterPro</a> |
| HeimC3_49540 | <a href="#">OLS18429</a> | hypothetical protein HeimC3_49540, parti...  | <a href="#">CDD</a> | <a href="#">UniProt</a> | <a href="#">Pfam</a> | <a href="#">InterPro</a> |

|                    |                          |                                             |                     |                         |                      |                                                      |
|--------------------|--------------------------|---------------------------------------------|---------------------|-------------------------|----------------------|------------------------------------------------------|
| HeimC3_52020       | <a href="#">OLS16692</a> | Cell-division control histidine kinase P... | <a href="#">CDD</a> | <a href="#">UniProt</a> | <a href="#">Pfam</a> | <a href="#">InterPro</a>                             |
| HeimC3_55280       | <a href="#">OLS16294</a> | Chemotaxis protein CheA, partial [Candid... | <a href="#">CDD</a> | <a href="#">UniProt</a> | <a href="#">Pfam</a> | <a href="#">InterPro</a>                             |
| HeimC3_55320       | <a href="#">OLS16298</a> | Chemotaxis protein CheA [Candidatus Heim... | <a href="#">CDD</a> | <a href="#">UniProt</a> | <a href="#">Pfam</a> | <a href="#">InterPro</a>                             |
| <b>Hybrid HisK</b> |                          |                                             |                     |                         |                      |                                                      |
| HeimC3_40090       | <a href="#">OLS20551</a> | Blue-light-activated protein [Candidatus... | <a href="#">CDD</a> | <a href="#">UniProt</a> | <a href="#">Pfam</a> | <a href="#">InterPro</a>                             |
| <b>REC only</b>    |                          |                                             |                     |                         |                      |                                                      |
| HeimC3_04930       | <a href="#">OLS27026</a> | hypothetical protein HeimC3_04930 [Candi... | <a href="#">CDD</a> | <a href="#">UniProt</a> | <a href="#">Pfam</a> | <a href="#">InterPro</a>                             |
| HeimC3_05030       | <a href="#">OLS27036</a> | Regulator of RpoS [Candidatus Heimdallar... | <a href="#">CDD</a> | <a href="#">UniProt</a> | <a href="#">Pfam</a> | <a href="#">InterPro</a>                             |
| HeimC3_07500       | <a href="#">OLS26648</a> | Transcriptional regulatory protein ZraR ... | <a href="#">CDD</a> | <a href="#">UniProt</a> | <a href="#">Pfam</a> | <a href="#">InterPro</a>                             |
| HeimC3_10590       | <a href="#">OLS26086</a> | Response regulator SaeR [Candidatus Heim... | <a href="#">CDD</a> | <a href="#">UniProt</a> | <a href="#">Pfam</a> | <a href="#">InterPro</a>                             |
| HeimC3_16650       | <a href="#">OLS25035</a> | Cyclic di-GMP phosphodiesterase response... | <a href="#">CDD</a> | <a href="#">UniProt</a> | <a href="#">Pfam</a> | <a href="#">InterPro</a>                             |
| HeimC3_22080       | <a href="#">OLS23983</a> | Regulator of RpoS [Candidatus Heimdallar... | <a href="#">CDD</a> | <a href="#">UniProt</a> | <a href="#">Pfam</a> | <a href="#">InterPro</a>                             |
| HeimC3_24850       | <a href="#">OLS23410</a> | Regulator of RpoS [Candidatus Heimdallar... | <a href="#">CDD</a> | <a href="#">UniProt</a> | <a href="#">Pfam</a> | <a href="#">InterPro</a>                             |
| HeimC3_25280       | <a href="#">OLS23364</a> | Signal transduction histidine-protein ki... | <a href="#">CDD</a> | <a href="#">UniProt</a> | <a href="#">Pfam</a> | <a href="#">InterPro</a>                             |
| HeimC3_34560       | <a href="#">OLS21609</a> | Chemotaxis protein CheY [Candidatus Heim... | <a href="#">CDD</a> | <a href="#">UniProt</a> | <a href="#">Pfam</a> | <a href="#">InterPro</a>                             |
| HeimC3_34820       | <a href="#">OLS21573</a> | Response regulator MprA, partial [Candid... | <a href="#">CDD</a> | <a href="#">UniProt</a> | <a href="#">Pfam</a> | <a href="#">InterPro</a>                             |
| HeimC3_37350       | <a href="#">OLS21088</a> | Response regulator MprA, partial [Candid... | <a href="#">CDD</a> | <a href="#">UniProt</a> | <a href="#">Pfam</a> | <a href="#">InterPro</a>                             |
| HeimC3_47210       | <a href="#">OLS19145</a> | hypothetical protein HeimC3_47210 [Candi... | <a href="#">CDD</a> | <a href="#">UniProt</a> | <a href="#">Pfam</a> | <a href="#">InterPro</a>                             |
| HeimC3_47220       | <a href="#">OLS19146</a> | Transcriptional regulatory protein ZraR ... | <a href="#">CDD</a> | <a href="#">UniProt</a> | <a href="#">Pfam</a> | <a href="#">InterPro</a>                             |
| HeimC3_47990       | <a href="#">OLS18861</a> | hypothetical protein HeimC3_47990 [Candi... | <a href="#">CDD</a> | <a href="#">UniProt</a> | <a href="#">Pfam</a> | <a href="#">InterPro</a>                             |
| HeimC3_55290       | <a href="#">OLS16295</a> | Chemotaxis protein CheY [Candidatus Heim... | <a href="#">CDD</a> | <a href="#">UniProt</a> | <a href="#">Pfam</a> | <a href="#">InterPro</a>                             |
| *HeimC3_10920      | <a href="#">OLS26119</a> | hypothetical protein HeimC3_10920 [Candi... | <a href="#">CDD</a> | <a href="#">UniProt</a> | <a href="#">Pfam</a> | <a href="#">InterPro</a>                             |
| <b>REC-HisK</b>    |                          |                                             |                     |                         |                      |                                                      |
| HeimC3_05100       | <a href="#">OLS27043</a> | Sporulation kinase A [Candidatus Heimdal... | <a href="#">CDD</a> | <a href="#">UniProt</a> | <a href="#">Pfam</a> | <a href="#">InterPro</a>                             |
| HeimC3_06660       | <a href="#">OLS26909</a> | Sensor protein FixL [Candidatus Heimdall... | <a href="#">CDD</a> | <a href="#">UniProt</a> | <a href="#">Pfam</a> | <a href="#">InterPro</a>                             |
| HeimC3_07560       | <a href="#">OLS26654</a> | Sporulation kinase A [Candidatus Heimdal... | <a href="#">CDD</a> | <a href="#">UniProt</a> | <a href="#">Pfam</a> | <a href="#">InterPro</a>                             |
| HeimC3_08590       | <a href="#">OLS26540</a> | Sporulation kinase E [Candidatus Heimdal... | <a href="#">CDD</a> | <a href="#">UniProt</a> | <a href="#">Pfam</a> | <a href="#">InterPro</a>                             |
| HeimC3_16370       | <a href="#">OLS25193</a> | Response regulator SaeR [Candidatus Heim... | <a href="#">CDD</a> | <a href="#">UniProt</a> | <a href="#">Pfam</a> | <a href="#">InterPro</a>                             |
| HeimC3_24200       | <a href="#">OLS23608</a> | Sporulation kinase E [Candidatus Heimdal... | <a href="#">CDD</a> | <a href="#">UniProt</a> | <a href="#">Pfam</a> | <a href="#">InterPro</a>                             |
| HeimC3_36920       | <a href="#">OLS21133</a> | Sensor protein ZraS [Candidatus Heimdall... | <a href="#">CDD</a> | <a href="#">UniProt</a> | <a href="#">Pfam</a> | <a href="#">InterPro</a>                             |
| HeimC3_38320       | <a href="#">OLS20921</a> | Response regulator ArlR [Candidatus Heim... | <a href="#">CDD</a> | <a href="#">UniProt</a> | <a href="#">Pfam</a> | <a href="#">InterPro</a>                             |
| <b>REC-PAS</b>     |                          |                                             |                     |                         |                      |                                                      |
| HeimC3_08160       | <a href="#">OLS26714</a> | Response regulator SaeR [Candidatus Heim... | <a href="#">CDD</a> | <a href="#">UniProt</a> | <a href="#">Pfam</a> | <a href="#">InterPro</a>                             |
| HeimC3_08350       | <a href="#">OLS26733</a> | Sensor histidine kinase TmoS [Candidatus... | <a href="#">CDD</a> | <a href="#">UniProt</a> | <a href="#">Pfam</a> | <a href="#">InterPro</a>                             |
| HeimC3_08410       | <a href="#">OLS26739</a> | Stage 0 sporulation protein A [Candidatu... | <a href="#">CDD</a> | <a href="#">UniProt</a> | <a href="#">Pfam</a> | <a href="#">InterPro</a>                             |
| HeimC3_16300       | <a href="#">OLS25186</a> | Cyclic di-GMP phosphodiesterase response... | <a href="#">CDD</a> | <a href="#">UniProt</a> | <a href="#">Pfam</a> | <a href="#">InterPro</a>                             |
| HeimC3_19170       | <a href="#">OLS24487</a> | Response regulator SaeR [Candidatus Heim... | <a href="#">CDD</a> | <a href="#">UniProt</a> | <a href="#">Pfam</a> | <a href="#">InterPro</a>                             |
| HeimC3_29710       | <a href="#">OLS22697</a> | Response regulator MprA [Candidatus Heim... | <a href="#">CDD</a> | <a href="#">UniProt</a> | <a href="#">Pfam</a> | <a href="#">InterPro</a>                             |
| HeimC3_35910       | <a href="#">OLS21346</a> | Transcriptional regulatory protein TcrA ... | <a href="#">CDD</a> | <a href="#">UniProt</a> | <a href="#">Pfam</a> | <a href="#">InterPro</a>                             |
| HeimC3_36900       | <a href="#">OLS21131</a> | Sensor histidine kinase TmoS [Candidatus... | <a href="#">CDD</a> | <a href="#">UniProt</a> | <a href="#">Pfam</a> | <a href="#">InterPro</a>                             |
| HeimC3_39980       | <a href="#">OLS20540</a> | Cyclic di-GMP phosphodiesterase response... | <a href="#">CDD</a> | <a href="#">UniProt</a> | <a href="#">Pfam</a> | <a href="#">InterPro</a>                             |
| HeimC3_42540       | <a href="#">OLS20043</a> | Stage 0 sporulation protein A [Candidatu... | <a href="#">CDD</a> | <a href="#">UniProt</a> | <a href="#">Pfam</a> | <a href="#">InterPro</a>                             |
| HeimC3_55370       | <a href="#">OLS16303</a> | Nitrogen fixation regulatory protein [Ca... | <a href="#">CDD</a> | <a href="#">UniProt</a> | <a href="#">Pfam</a> | <a href="#">InterPro</a>                             |
| <b>Other RRs</b>   |                          |                                             |                     |                         |                      |                                                      |
| HeimC3_34530       | <a href="#">OLS21606</a> | Alkaline phosphatase synthesis transcrip... | <a href="#">CDD</a> | <a href="#">UniProt</a> | <a href="#">Pfam</a> | <a href="#">InterPro</a>                             |
| HeimC3_20500       | <a href="#">OLS24332</a> | Alkaline phosphatase synthesis transcrip... | <a href="#">CDD</a> | <a href="#">UniProt</a> | <a href="#">Pfam</a> | <a href="#">InterPro</a>                             |
| HeimC3_16400       | <a href="#">OLS25196</a> | Alkaline phosphatase synthesis transcrip... | <a href="#">CDD</a> | <a href="#">UniProt</a> | <a href="#">Pfam</a> | <a href="#">InterPro</a>                             |
| HeimC3_25240       | <a href="#">OLS23360</a> | Alkaline phosphatase synthesis transcrip... | <a href="#">CDD</a> | <a href="#">UniProt</a> | <a href="#">Pfam</a> | <a href="#">InterPro</a>                             |
| HeimC3_46250       | <a href="#">OLS19303</a> | Response regulator SaeR [Candidatus Heim... | <a href="#">CDD</a> | <a href="#">UniProt</a> | <a href="#">Pfam</a> | <a href="#">InterPro</a> (wHTH-PAS-REC-PAS)          |
| HeimC3_04650       | <a href="#">OLS27294</a> | Response regulator SaeR [Candidatus Heim... | <a href="#">CDD</a> | <a href="#">UniProt</a> | <a href="#">Pfam</a> | <a href="#">InterPro</a>                             |
| HeimC3_38270       | <a href="#">OLS20916</a> | Hydrogenase transcriptional regulatory p... | <a href="#">CDD</a> | <a href="#">UniProt</a> | <a href="#">Pfam</a> | <a href="#">InterPro</a>                             |
| HeimC3_22900       | <a href="#">OLS23818</a> | Hydrogenase transcriptional regulatory p... | <a href="#">CDD</a> | <a href="#">UniProt</a> | <a href="#">Pfam</a> | <a href="#">InterPro</a>                             |
| HeimC3_09140       | <a href="#">OLS26364</a> | Thioredoxin reductase [Candidatus Heimda... | <a href="#">CDD</a> | <a href="#">UniProt</a> | <a href="#">Pfam</a> | <a href="#">InterPro</a> (REC-Thioredoxin reductase) |
| HeimC3_22750       | <a href="#">OLS23803</a> | Transforming protein p29 precursor [Cand... | <a href="#">CDD</a> | <a href="#">UniProt</a> | <a href="#">Pfam</a> | <a href="#">InterPro</a> (REC-GTPase_XXX)            |
| HeimC3_22760       | <a href="#">OLS23804</a> | DNA-binding response regulator MtrA [Can... | <a href="#">CDD</a> | <a href="#">UniProt</a> | <a href="#">Pfam</a> | <a href="#">InterPro</a> (REC-GTPase_XXX)            |
| HeimC3_22790       | <a href="#">OLS23807</a> | hypothetical protein HeimC3_22790 [Candi... | <a href="#">CDD</a> | <a href="#">UniProt</a> | <a href="#">Pfam</a> | <a href="#">InterPro</a> (REC-PPDK)                  |

## Candidatus Thorarchaeota

### Candidatus Thorarchaeota archaeon AB\_25

#### **HisK, no REC**

|                 |                          |                                           |                     |                         |                      |                          |
|-----------------|--------------------------|-------------------------------------------|---------------------|-------------------------|----------------------|--------------------------|
| ThorAB25_12070  | <a href="#">OLS30105</a> | hypothetical protein ThorAB25_12070, p... | <a href="#">CDD</a> | <a href="#">UniProt</a> | <a href="#">Pfam</a> | <a href="#">InterPro</a> |
| ThorAB25_13800  | <a href="#">OLS29848</a> | Sensor protein FixL [Candidatus Thorar... | <a href="#">CDD</a> | <a href="#">UniProt</a> | <a href="#">Pfam</a> | <a href="#">InterPro</a> |
| ThorAB25_14840  | <a href="#">OLS29699</a> | Histidine protein kinase SaeS [Candida... | <a href="#">CDD</a> | <a href="#">UniProt</a> | <a href="#">Pfam</a> | <a href="#">InterPro</a> |
| ThorAB25_18290  | <a href="#">OLS28591</a> | Sporulation kinase A [Candidatus Thora... | <a href="#">CDD</a> | <a href="#">UniProt</a> | <a href="#">Pfam</a> | <a href="#">InterPro</a> |
| ThorAB25_18300  | <a href="#">OLS28592</a> | Swarming motility regulation sensor pr... | <a href="#">CDD</a> | <a href="#">UniProt</a> | <a href="#">Pfam</a> | <a href="#">InterPro</a> |
| ThorAB25_24240  | <a href="#">OLS23754</a> | Sensor histidine kinase DpiB [Candidat... | <a href="#">CDD</a> | <a href="#">UniProt</a> | <a href="#">Pfam</a> | <a href="#">InterPro</a> |
| ThorAB25_25390  | <a href="#">OLS22577</a> | Autoinducer 2 sensor kinase/phosphatas... | <a href="#">CDD</a> | <a href="#">UniProt</a> | <a href="#">Pfam</a> | <a href="#">InterPro</a> |
| ThorAB25_26240  | <a href="#">OLS21915</a> | Sporulation kinase A [Candidatus Thora... | <a href="#">CDD</a> | <a href="#">UniProt</a> | <a href="#">Pfam</a> | <a href="#">InterPro</a> |
| ThorAB25_28470  | <a href="#">OLS20297</a> | hypothetical protein ThorAB25_28470, p... | <a href="#">CDD</a> | <a href="#">UniProt</a> | <a href="#">Pfam</a> | <a href="#">InterPro</a> |
| ThorAB25_28990  | <a href="#">OLS19832</a> | Signal-transduction histidine kinase s... | <a href="#">CDD</a> | <a href="#">UniProt</a> | <a href="#">Pfam</a> | <a href="#">InterPro</a> |
| <b>REC only</b> |                          |                                           |                     |                         |                      |                          |
| ThorAB25_07510  | <a href="#">OLS30773</a> | Response regulator protein VraR [Candi... | <a href="#">CDD</a> | <a href="#">UniProt</a> | <a href="#">Pfam</a> | <a href="#">InterPro</a> |
| ThorAB25_11630  | <a href="#">OLS30166</a> | Chemotaxis protein CheY [Candidatus Th... | <a href="#">CDD</a> | <a href="#">UniProt</a> | <a href="#">Pfam</a> | <a href="#">InterPro</a> |
| ThorAB25_11640  | <a href="#">OLS30167</a> | putative transcriptional regulatory pr... | <a href="#">CDD</a> | <a href="#">UniProt</a> | <a href="#">Pfam</a> | <a href="#">InterPro</a> |
| ThorAB25_11660  | <a href="#">OLS30169</a> | Alkaline phosphatase synthesis transcr... | <a href="#">CDD</a> | <a href="#">UniProt</a> | <a href="#">Pfam</a> | <a href="#">InterPro</a> |

**REC-HisK**

|                    |                          |                                           |                     |                         |                      |                          |
|--------------------|--------------------------|-------------------------------------------|---------------------|-------------------------|----------------------|--------------------------|
| ThorAB25_17150     | <a href="#">OLS29206</a> | Sporulation kinase E [Candidatus Thora... | <a href="#">CDD</a> | <a href="#">UniProt</a> | <a href="#">Pfam</a> | <a href="#">InterPro</a> |
| <b>REC-PAS\GAF</b> |                          |                                           |                     |                         |                      |                          |
| ThorAB25_18330     | <a href="#">OLS28595</a> | Stage 0 sporulation protein A [Candida... | <a href="#">CDD</a> | <a href="#">UniProt</a> | <a href="#">Pfam</a> | <a href="#">InterPro</a> |

**Candidatus Thorarchaeota****Candidatus Thorarchaeota archaeon SMTZ-45****HisK, no REC**

|             |                          |                                              |                     |                         |                      |                          |
|-------------|--------------------------|----------------------------------------------|---------------------|-------------------------|----------------------|--------------------------|
| AM326_00720 | <a href="#">KXH72882</a> | hypothetical protein AM326_00720 [Candida... | <a href="#">CDD</a> | <a href="#">UniProt</a> | <a href="#">Pfam</a> | <a href="#">InterPro</a> |
| AM326_06830 | <a href="#">KXH76655</a> | hypothetical protein AM326_06830 [Candida... | <a href="#">CDD</a> | <a href="#">UniProt</a> | <a href="#">Pfam</a> | <a href="#">InterPro</a> |
| AM326_07950 | <a href="#">KXH76036</a> | hypothetical protein AM326_07950 [Candida... | <a href="#">CDD</a> | <a href="#">UniProt</a> | <a href="#">Pfam</a> | <a href="#">InterPro</a> |
| AM326_01840 | <a href="#">KXH77035</a> | hypothetical protein AM326_01840 [Candida... | <a href="#">CDD</a> | <a href="#">UniProt</a> | <a href="#">Pfam</a> | <a href="#">InterPro</a> |

**REC only**

|             |                          |                                              |                     |                         |                      |                          |
|-------------|--------------------------|----------------------------------------------|---------------------|-------------------------|----------------------|--------------------------|
| AM326_03580 | <a href="#">KXH72432</a> | hypothetical protein AM326_03580 [Candida... | <a href="#">CDD</a> | <a href="#">UniProt</a> | <a href="#">Pfam</a> | <a href="#">InterPro</a> |
|-------------|--------------------------|----------------------------------------------|---------------------|-------------------------|----------------------|--------------------------|

**Candidatus Thorarchaeota archaeon SMTZ1-45****HisK, no REC**

|             |                          |                                              |                     |                         |                      |                          |
|-------------|--------------------------|----------------------------------------------|---------------------|-------------------------|----------------------|--------------------------|
| AM325_12800 | <a href="#">KXH74302</a> | hypothetical protein AM325_12800 [Candida... | <a href="#">CDD</a> | <a href="#">UniProt</a> | <a href="#">Pfam</a> | <a href="#">InterPro</a> |
| AM325_13570 | <a href="#">KXH73682</a> | hypothetical protein AM325_13570 [Candida... | <a href="#">CDD</a> | <a href="#">UniProt</a> | <a href="#">Pfam</a> | <a href="#">InterPro</a> |
| AM325_13650 | <a href="#">KXH73644</a> | hypothetical protein AM325_13650 [Candida... | <a href="#">CDD</a> | <a href="#">UniProt</a> | <a href="#">Pfam</a> | <a href="#">InterPro</a> |
| AM325_13670 | <a href="#">KXH73648</a> | hypothetical protein AM325_13670 [Candida... | <a href="#">CDD</a> | <a href="#">UniProt</a> | <a href="#">Pfam</a> | <a href="#">InterPro</a> |
| AM325_13725 | <a href="#">KXH73581</a> | hypothetical protein AM325_13725 [Candida... | <a href="#">CDD</a> | <a href="#">UniProt</a> | <a href="#">Pfam</a> | <a href="#">InterPro</a> |
| AM325_13730 | <a href="#">KXH73582</a> | hypothetical protein AM325_13730 [Candida... | <a href="#">CDD</a> | <a href="#">UniProt</a> | <a href="#">Pfam</a> | <a href="#">InterPro</a> |
| AM325_14985 | <a href="#">KXH71395</a> | hypothetical protein AM325_14985 [Candida... | <a href="#">CDD</a> | <a href="#">UniProt</a> | <a href="#">Pfam</a> | <a href="#">InterPro</a> |
| AM325_16040 | <a href="#">KXH75682</a> | hypothetical protein AM325_16040 [Candida... | <a href="#">CDD</a> | <a href="#">UniProt</a> | <a href="#">Pfam</a> | <a href="#">InterPro</a> |

**REC only**

|              |                          |                                              |                     |                         |                      |                          |
|--------------|--------------------------|----------------------------------------------|---------------------|-------------------------|----------------------|--------------------------|
| AM325_08215  | <a href="#">KXH73176</a> | hypothetical protein AM325_08215 [Candida... | <a href="#">CDD</a> | <a href="#">UniProt</a> | <a href="#">Pfam</a> | <a href="#">InterPro</a> |
| AM325_08210  | <a href="#">KXH73193</a> | hypothetical protein AM325_08210 [Candida... | <a href="#">CDD</a> | <a href="#">UniProt</a> | <a href="#">Pfam</a> | <a href="#">InterPro</a> |
| AM325_06800  | <a href="#">KXH73889</a> | hypothetical protein AM325_06800 [Candida... | <a href="#">CDD</a> | <a href="#">UniProt</a> | <a href="#">Pfam</a> | <a href="#">InterPro</a> |
| *AM325_08225 | <a href="#">KXH73178</a> | hypothetical protein AM325_08225 [Candida... | <a href="#">CDD</a> | <a href="#">UniProt</a> | <a href="#">Pfam</a> | <a href="#">InterPro</a> |

**REC-HisK**

|             |                          |                                              |                     |                         |                      |                          |
|-------------|--------------------------|----------------------------------------------|---------------------|-------------------------|----------------------|--------------------------|
| AM325_03235 | <a href="#">KXH70391</a> | hypothetical protein AM325_03235 [Candida... | <a href="#">CDD</a> | <a href="#">UniProt</a> | <a href="#">Pfam</a> | <a href="#">InterPro</a> |
|-------------|--------------------------|----------------------------------------------|---------------------|-------------------------|----------------------|--------------------------|

**REC-GAF-PAS**

|             |                          |                                              |                     |                         |                      |                          |
|-------------|--------------------------|----------------------------------------------|---------------------|-------------------------|----------------------|--------------------------|
| AM325_13850 | <a href="#">KXH73528</a> | hypothetical protein AM325_13850 [Candida... | <a href="#">CDD</a> | <a href="#">UniProt</a> | <a href="#">Pfam</a> | <a href="#">InterPro</a> |
|-------------|--------------------------|----------------------------------------------|---------------------|-------------------------|----------------------|--------------------------|

**Other RRs**

|             |                          |                                              |                     |                         |                      |                          |           |
|-------------|--------------------------|----------------------------------------------|---------------------|-------------------------|----------------------|--------------------------|-----------|
| AM325_16070 | <a href="#">KXH75686</a> | hypothetical protein AM325_16070 [Candida... | <a href="#">CDD</a> | <a href="#">UniProt</a> | <a href="#">Pfam</a> | <a href="#">InterPro</a> | REC-HisKA |
|-------------|--------------------------|----------------------------------------------|---------------------|-------------------------|----------------------|--------------------------|-----------|

**Candidatus Thorarchaeota archaeon SMTZ1-83****HisK, no REC**

|             |                          |                                              |                     |                         |                      |                          |
|-------------|--------------------------|----------------------------------------------|---------------------|-------------------------|----------------------|--------------------------|
| AM324_00720 | <a href="#">KXH72757</a> | hypothetical protein AM324_00720 [Candida... | <a href="#">CDD</a> | <a href="#">UniProt</a> | <a href="#">Pfam</a> | <a href="#">InterPro</a> |
| AM324_01610 | <a href="#">KXH70125</a> | hypothetical protein AM324_01610 [Candida... | <a href="#">CDD</a> | <a href="#">UniProt</a> | <a href="#">Pfam</a> | <a href="#">InterPro</a> |
| AM324_01875 | <a href="#">KXH69850</a> | hypothetical protein AM324_01875 [Candida... | <a href="#">CDD</a> | <a href="#">UniProt</a> | <a href="#">Pfam</a> | <a href="#">InterPro</a> |
| AM324_02020 | <a href="#">KXH69727</a> | hypothetical protein AM324_02020 [Candida... | <a href="#">CDD</a> | <a href="#">UniProt</a> | <a href="#">Pfam</a> | <a href="#">InterPro</a> |
| AM324_03460 | <a href="#">KXH77605</a> | hypothetical protein AM324_03460, partial... | <a href="#">CDD</a> | <a href="#">UniProt</a> | <a href="#">Pfam</a> | <a href="#">InterPro</a> |
| AM324_07590 | <a href="#">KXH72273</a> | hypothetical protein AM324_07590 [Candida... | <a href="#">CDD</a> | <a href="#">UniProt</a> | <a href="#">Pfam</a> | <a href="#">InterPro</a> |
| AM324_10450 | <a href="#">KXH69774</a> | hypothetical protein AM324_10450 [Candida... | <a href="#">CDD</a> | <a href="#">UniProt</a> | <a href="#">Pfam</a> | <a href="#">InterPro</a> |
| AM324_10920 | <a href="#">KXH78072</a> | hypothetical protein AM324_10920 [Candida... | <a href="#">CDD</a> | <a href="#">UniProt</a> | <a href="#">Pfam</a> | <a href="#">InterPro</a> |
| AM324_10940 | <a href="#">KXH78076</a> | hypothetical protein AM324_10940 [Candida... | <a href="#">CDD</a> | <a href="#">UniProt</a> | <a href="#">Pfam</a> | <a href="#">InterPro</a> |
| AM324_10955 | <a href="#">KXH78079</a> | hypothetical protein AM324_10955 [Candida... | <a href="#">CDD</a> | <a href="#">UniProt</a> | <a href="#">Pfam</a> | <a href="#">InterPro</a> |
| AM324_10960 | <a href="#">KXH78080</a> | hypothetical protein AM324_10960 [Candida... | <a href="#">CDD</a> | <a href="#">UniProt</a> | <a href="#">Pfam</a> | <a href="#">InterPro</a> |
| AM324_14600 | <a href="#">KXH76103</a> | hypothetical protein AM324_14600 [Candida... | <a href="#">CDD</a> | <a href="#">UniProt</a> | <a href="#">Pfam</a> | <a href="#">InterPro</a> |
| AM324_14700 | <a href="#">KXH76058</a> | hypothetical protein AM324_14700 [Candida... | <a href="#">CDD</a> | <a href="#">UniProt</a> | <a href="#">Pfam</a> | <a href="#">InterPro</a> |
| AM324_15385 | <a href="#">KXH75146</a> | hypothetical protein AM324_15385 [Candida... | <a href="#">CDD</a> | <a href="#">UniProt</a> | <a href="#">Pfam</a> | <a href="#">InterPro</a> |

**REC only**

|             |                          |                                              |                     |                         |                      |                          |
|-------------|--------------------------|----------------------------------------------|---------------------|-------------------------|----------------------|--------------------------|
| AM324_05925 | <a href="#">KXH74275</a> | hypothetical protein AM324_05925 [Candida... | <a href="#">CDD</a> | <a href="#">UniProt</a> | <a href="#">Pfam</a> | <a href="#">InterPro</a> |
| AM324_05930 | <a href="#">KXH74276</a> | hypothetical protein AM324_05930 [Candida... | <a href="#">CDD</a> | <a href="#">UniProt</a> | <a href="#">Pfam</a> | <a href="#">InterPro</a> |
| AM324_10965 | <a href="#">KXH78081</a> | hypothetical protein AM324_10965 [Candida... | <a href="#">CDD</a> | <a href="#">UniProt</a> | <a href="#">Pfam</a> | <a href="#">InterPro</a> |
| AM324_10585 | <a href="#">KXH78171</a> | hypothetical protein AM324_10585 [Candida... | <a href="#">CDD</a> | <a href="#">UniProt</a> | <a href="#">Pfam</a> | <a href="#">InterPro</a> |

**NtrC family (REC-AAA-Fis)**

|             |                          |                                              |                     |                         |                      |                          |
|-------------|--------------------------|----------------------------------------------|---------------------|-------------------------|----------------------|--------------------------|
| AM324_01870 | <a href="#">KXH69849</a> | Fis family transcriptional regulator [Can... | <a href="#">CDD</a> | <a href="#">UniProt</a> | <a href="#">Pfam</a> | <a href="#">InterPro</a> |
|-------------|--------------------------|----------------------------------------------|---------------------|-------------------------|----------------------|--------------------------|

**DPANN group****Candidatus Aenigmarchaeota****Candidatus Aenigmarchaeota archaeon CG1\_02\_38\_14****HisK, no REC**

|             |                          |                                              |                     |                         |                      |                          |
|-------------|--------------------------|----------------------------------------------|---------------------|-------------------------|----------------------|--------------------------|
| AUJ50_03965 | <a href="#">OIN86203</a> | hypothetical protein AUJ50_03965 [Candida... | <a href="#">CDD</a> | <a href="#">UniProt</a> | <a href="#">Pfam</a> | <a href="#">InterPro</a> |
|-------------|--------------------------|----------------------------------------------|---------------------|-------------------------|----------------------|--------------------------|

**REC only**

|             |                          |                                              |                     |                         |                      |                          |
|-------------|--------------------------|----------------------------------------------|---------------------|-------------------------|----------------------|--------------------------|
| AUJ50_00645 | <a href="#">OIN88531</a> | hypothetical protein AUJ50_00645 [Candida... | <a href="#">CDD</a> | <a href="#">UniProt</a> | <a href="#">Pfam</a> | <a href="#">InterPro</a> |
| AUJ50_03955 | <a href="#">OIN86201</a> | hypothetical protein AUJ50_03955 [Candida... | <a href="#">CDD</a> | <a href="#">UniProt</a> | <a href="#">Pfam</a> | <a href="#">InterPro</a> |
| AUJ50_03960 | <a href="#">OIN86202</a> | hypothetical protein AUJ50_03960 [Candida... | <a href="#">CDD</a> | <a href="#">UniProt</a> | <a href="#">Pfam</a> | <a href="#">InterPro</a> |

Candidatus Micrarchaeota

Candidatus Micrarchaeota archaeon CGI\_02\_55\_22

**HisK, no REC**

AUJ14\_02250 [OIO26197](#) hypothetical protein AUJ14\_02250 [Candida... [CDD](#) [UniProt](#) [Pfam](#) [InterPro](#)

**Other RRs**

AUJ14\_05545 [OIO24744](#) hypothetical protein AUJ14\_05545 [Candida... [CDD](#) [UniProt](#) [Pfam](#) [InterPro](#)

---

Candidatus Micrarchaeota archaeon RBG\_16\_49\_10

**REC only**

A3K63\_00125 [OGI15767](#) hypothetical protein A3K63\_00125 [Candida... [CDD](#) [UniProt](#) [Pfam](#) [InterPro](#)

---

Candidatus Micrarchaeum acidiphilum ARMAN-1

**HisK, no REC**

BK997\_01990 [OJI07769](#) hypothetical protein BK997\_01990 [Candida... [CDD](#) [UniProt](#) [Pfam](#) [InterPro](#)

**REC-GGDEF**

BK997\_02000 [OJI07771](#) hypothetical protein BK997\_02000 [Candida... [CDD](#) [UniProt](#) [Pfam](#) [InterPro](#) (REC-GGDEF)

---

Candidatus Micrarchaeum acidiphilum ARMAN-2

**HisK, no REC**

UNLARM2\_0160 [EET90488](#) Signal transduction histidine kinase reg... [CDD](#) [UniProt](#) [Pfam](#) [InterPro](#)

UNLARM2\_0237 [EET90383](#) PAS/PAC sensor signal transduction histi... [CDD](#) [UniProt](#) [Pfam](#) [InterPro](#)

**REC-GGDEF**

UNLARM2\_0239 [EET90385](#) response regulator receiver protein [Can... [CDD](#) [UniProt](#) [Pfam](#) [InterPro](#) (wHTH-REC-GGDEF)

---

Candidatus Micrarchaeum sp. AZ1

**REC-GGDEF**

JJ59\_05330 [OJT93977](#) hypothetical protein JJ59\_05330 [Candidatu... [CDD](#) [UniProt](#) [Pfam](#) [InterPro](#) (REC-GGDEF)

---

Candidatus Nanohaloarchaeota

Candidatus Nanosalina sp. J07AB43

**HisK, no REC**

J07AB43\_06780 [EGQ42691](#) putative histidine kinase [Candidatus N... [CDD](#) [UniProt](#) [Pfam](#) [InterPro](#)

**REC-HisK**

J07AB43\_10260 [EGQ43037](#) PAS sensor histidine kinase [Candidatus... [CDD](#) [UniProt](#) [Pfam](#) [InterPro](#)

**REC-PAS**

J07AB43\_06220 [EGQ43744](#) response regulator [Candidatus Nanosali... [CDD](#) [UniProt](#) [Pfam](#) [InterPro](#)

**wHTH-REC**

J07AB43\_10250 [EGQ43036](#) putative transcriptional regulator [Can... [CDD](#) [UniProt](#) [Pfam](#) [InterPro](#)

---

Candidatus Nanosalinarum sp. J07AB56

**REC only**

J07AB56\_11580 [EGQ40429](#) hypothetical protein J07AB56\_11580 [Ca... [CDD](#) [UniProt](#) [Pfam](#) [InterPro](#)

---

Candidatus Pacearchaeota

Candidatus Pacearchaeota archaeon RBG\_13\_36\_9

**HisK, no REC**

A3K73\_04080 [OGJ15728](#) hypothetical protein A3K73\_04080, partial... [CDD](#) [UniProt](#) [Pfam](#) [InterPro](#)

A3K73\_05640 [OGJ21307](#) hypothetical protein A3K73\_05640 [Candida... [CDD](#) [UniProt](#) [Pfam](#) [InterPro](#)

A3K73\_05595 [OGJ21298](#) hypothetical protein A3K73\_05595 [Candida... [CDD](#) [UniProt](#) [Pfam](#) [InterPro](#)

**REC only**

A3K73\_05570 [OGJ21293](#) hypothetical protein A3K73\_05570 [Candida... [CDD](#) [UniProt](#) [Pfam](#) [InterPro](#)

A3K73\_05590 [OGJ21297](#) hypothetical protein A3K73\_05590 [Candida... [CDD](#) [UniProt](#) [Pfam](#) [InterPro](#)

A3K73\_05635 [OGJ21306](#) hypothetical protein A3K73\_05635 [Candida... [CDD](#) [UniProt](#) [Pfam](#) [InterPro](#)

A3K73\_05620 [OGJ21303](#) hypothetical protein A3K73\_05620 [Candida... [CDD](#) [UniProt](#) [Pfam](#) [InterPro](#)

**Other RRs**

A3K73\_00520 [OGJ16906](#) hypothetical protein A3K73\_00520 [Candida... [CDD](#) [UniProt](#) [Pfam](#) [InterPro](#)

A3K73\_04085 [OGJ15729](#) hypothetical protein A3K73\_04085 [Candida... [CDD](#) [UniProt](#) [Pfam](#) [InterPro](#)

---

Candidatus Pacearchaeota archaeon RBG\_16\_35\_8

**REC only**

A3K62\_00590 [OGJ12735](#) hypothetical protein A3K62\_00590 [Candida... [CDD](#) [UniProt](#) [Pfam](#) [InterPro](#)

---

Candidatus Woesearchaeota

Candidatus Woesearchaeota archaeon CGI\_02\_57\_44

**HisK, no REC**

AUJ68\_00545 [OIO66483](#) hypothetical protein AUJ68\_00545 [Candida... [CDD](#) [UniProt](#) [Pfam](#) [InterPro](#)

AUJ68\_00560 [OIO66486](#) hypothetical protein AUJ68\_00560 [Candida... [CDD](#) [UniProt](#) [Pfam](#) [InterPro](#)

|                 |                          |                                              |                     |                         |                      |                          |
|-----------------|--------------------------|----------------------------------------------|---------------------|-------------------------|----------------------|--------------------------|
| AUJ68_04715     | <a href="#">OIO64828</a> | hypothetical protein AUJ68_04715 [Candida... | <a href="#">CDD</a> | <a href="#">UniProt</a> | <a href="#">Pfam</a> | <a href="#">InterPro</a> |
| <b>REC only</b> |                          |                                              |                     |                         |                      |                          |
| AUJ68_00555     | <a href="#">OIO66485</a> | hypothetical protein AUJ68_00555 [Candida... | <a href="#">CDD</a> | <a href="#">UniProt</a> | <a href="#">Pfam</a> | <a href="#">InterPro</a> |

---

**TACK group**

**Candidatus Bathyarchaeota**

**Candidatus Bathyarchaeota archaeon B26-1**

|                 |                          |                                             |                     |                         |                      |                          |
|-----------------|--------------------------|---------------------------------------------|---------------------|-------------------------|----------------------|--------------------------|
| <b>REC only</b> |                          |                                             |                     |                         |                      |                          |
| AYL31_009600    | <a href="#">KYH39473</a> | response regulator receiver domain-conta... | <a href="#">CDD</a> | <a href="#">UniProt</a> | <a href="#">Pfam</a> | <a href="#">InterPro</a> |

---

**Candidatus Bathyarchaeota archaeon B26-2**

|                 |                          |                                             |                     |                         |                      |                          |
|-----------------|--------------------------|---------------------------------------------|---------------------|-------------------------|----------------------|--------------------------|
| <b>REC only</b> |                          |                                             |                     |                         |                      |                          |
| AYL32_010350    | <a href="#">KYH40679</a> | response regulator receiver domain-conta... | <a href="#">CDD</a> | <a href="#">UniProt</a> | <a href="#">Pfam</a> | <a href="#">InterPro</a> |
| AYL32_011520    | <a href="#">KYH40474</a> | response regulator receiver domain-conta... | <a href="#">CDD</a> | <a href="#">UniProt</a> | <a href="#">Pfam</a> | <a href="#">InterPro</a> |

---

**Candidatus Bathyarchaeota archaeon B63**

|                 |                          |                                             |                     |                         |                      |                          |
|-----------------|--------------------------|---------------------------------------------|---------------------|-------------------------|----------------------|--------------------------|
| <b>REC only</b> |                          |                                             |                     |                         |                      |                          |
| AYL33_000980    | <a href="#">KYH42750</a> | response regulator receiver domain-conta... | <a href="#">CDD</a> | <a href="#">UniProt</a> | <a href="#">Pfam</a> | <a href="#">InterPro</a> |

---

**Candidatus Bathyarchaeota archaeon RBG\_13\_38\_9**

|                     |                          |                                              |                     |                         |                      |                          |
|---------------------|--------------------------|----------------------------------------------|---------------------|-------------------------|----------------------|--------------------------|
| <b>HisK, no REC</b> |                          |                                              |                     |                         |                      |                          |
| A3K80_03685         | <a href="#">OGD53009</a> | hypothetical protein A3K80_03685 [Candida... | <a href="#">CDD</a> | <a href="#">UniProt</a> | <a href="#">Pfam</a> | <a href="#">InterPro</a> |
| <b>REC only</b>     |                          |                                              |                     |                         |                      |                          |
| A3K80_03790         | <a href="#">OGD53025</a> | response regulator [Candidatus Bathyarcha... | <a href="#">CDD</a> | <a href="#">UniProt</a> | <a href="#">Pfam</a> | <a href="#">InterPro</a> |
| A3K80_03830         | <a href="#">OGD53028</a> | hypothetical protein A3K80_03830 [Candida... | <a href="#">CDD</a> | <a href="#">UniProt</a> | <a href="#">Pfam</a> | <a href="#">InterPro</a> |
| <b>REC-HisK</b>     |                          |                                              |                     |                         |                      |                          |
| A3K80_03775         | <a href="#">OGD53022</a> | hypothetical protein A3K80_03775 [Candida... | <a href="#">CDD</a> | <a href="#">UniProt</a> | <a href="#">Pfam</a> | <a href="#">InterPro</a> |
| <b>Other RRs</b>    |                          |                                              |                     |                         |                      |                          |
| A3K80_03680         | <a href="#">OGD53008</a> | hypothetical protein A3K80_03680 [Candida... | <a href="#">CDD</a> | <a href="#">UniProt</a> | <a href="#">Pfam</a> | <a href="#">InterPro</a> |
| A3K80_03780         | <a href="#">OGD53023</a> | hypothetical protein A3K80_03780 [Candida... | <a href="#">CDD</a> | <a href="#">UniProt</a> | <a href="#">Pfam</a> | <a href="#">InterPro</a> |
| A3K80_03765         | <a href="#">OGD53020</a> | hypothetical protein A3K80_03765 [Candida... | <a href="#">CDD</a> | <a href="#">UniProt</a> | <a href="#">Pfam</a> | <a href="#">InterPro</a> |
| A3K80_03770         | <a href="#">OGD53021</a> | hypothetical protein A3K80_03770 [Candida... | <a href="#">CDD</a> | <a href="#">UniProt</a> | <a href="#">Pfam</a> | <a href="#">InterPro</a> |

---

**Candidatus Bathyarchaeota archaeon RBG\_13\_46\_16b**

|                     |                          |                                              |                     |                         |                      |                          |
|---------------------|--------------------------|----------------------------------------------|---------------------|-------------------------|----------------------|--------------------------|
| <b>HisK, no REC</b> |                          |                                              |                     |                         |                      |                          |
| A3K79_04075         | <a href="#">OGD45073</a> | hypothetical protein A3K79_04075 [Candida... | <a href="#">CDD</a> | <a href="#">UniProt</a> | <a href="#">Pfam</a> | <a href="#">InterPro</a> |
| A3K79_05095         | <a href="#">OGD47194</a> | hypothetical protein A3K79_05095, partial... | <a href="#">CDD</a> | <a href="#">UniProt</a> | <a href="#">Pfam</a> | <a href="#">InterPro</a> |
| A3K79_06350         | <a href="#">OGD47042</a> | hypothetical protein A3K79_06350 [Candida... | <a href="#">CDD</a> | <a href="#">UniProt</a> | <a href="#">Pfam</a> | <a href="#">InterPro</a> |
| <b>REC only</b>     |                          |                                              |                     |                         |                      |                          |
| A3K79_00270         | <a href="#">OGD47957</a> | hypothetical protein A3K79_00270 [Candida... | <a href="#">CDD</a> | <a href="#">UniProt</a> | <a href="#">Pfam</a> | <a href="#">InterPro</a> |
| A3K79_01200         | <a href="#">OGD45118</a> | hypothetical protein A3K79_01200 [Candida... | <a href="#">CDD</a> | <a href="#">UniProt</a> | <a href="#">Pfam</a> | <a href="#">InterPro</a> |
| A3K79_02080         | <a href="#">OGD47072</a> | hypothetical protein A3K79_02080 [Candida... | <a href="#">CDD</a> | <a href="#">UniProt</a> | <a href="#">Pfam</a> | <a href="#">InterPro</a> |
| <b>REC-HisK</b>     |                          |                                              |                     |                         |                      |                          |
| A3K79_00265         | <a href="#">OGD47956</a> | hypothetical protein A3K79_00265 [Candida... | <a href="#">CDD</a> | <a href="#">UniProt</a> | <a href="#">Pfam</a> | <a href="#">InterPro</a> |
| <b>REC-PAS</b>      |                          |                                              |                     |                         |                      |                          |
| A3K79_07615         | <a href="#">OGD44168</a> | hypothetical protein A3K79_07615, partial... | <a href="#">CDD</a> | <a href="#">UniProt</a> | <a href="#">Pfam</a> | <a href="#">InterPro</a> |

---

**Candidatus Bathyarchaeota archaeon RBG\_13\_52\_12**

|                     |                          |                                              |                     |                         |                      |                          |
|---------------------|--------------------------|----------------------------------------------|---------------------|-------------------------|----------------------|--------------------------|
| <b>HisK, no REC</b> |                          |                                              |                     |                         |                      |                          |
| A3K78_02615         | <a href="#">OGD55262</a> | hypothetical protein A3K78_02615 [Candida... | <a href="#">CDD</a> | <a href="#">UniProt</a> | <a href="#">Pfam</a> | <a href="#">InterPro</a> |
| A3K78_06220         | <a href="#">OGD56148</a> | hypothetical protein A3K78_06220, partial... | <a href="#">CDD</a> | <a href="#">UniProt</a> | <a href="#">Pfam</a> | <a href="#">InterPro</a> |
| A3K78_09135         | <a href="#">OGD60431</a> | hypothetical protein A3K78_09135 [Candida... | <a href="#">CDD</a> | <a href="#">UniProt</a> | <a href="#">Pfam</a> | <a href="#">InterPro</a> |
| A3K78_10795         | <a href="#">OGD58987</a> | hypothetical protein A3K78_10795 [Candida... | <a href="#">CDD</a> | <a href="#">UniProt</a> | <a href="#">Pfam</a> | <a href="#">InterPro</a> |
| <b>REC only</b>     |                          |                                              |                     |                         |                      |                          |
| A3K78_02610         | <a href="#">OGD55264</a> | hypothetical protein A3K78_02610 [Candida... | <a href="#">CDD</a> | <a href="#">UniProt</a> | <a href="#">Pfam</a> | <a href="#">InterPro</a> |
| A3K78_05125         | <a href="#">OGD56561</a> | two-component system response regulator [... | <a href="#">CDD</a> | <a href="#">UniProt</a> | <a href="#">Pfam</a> | <a href="#">InterPro</a> |
| A3K78_06255         | <a href="#">OGD56153</a> | hypothetical protein A3K78_06255 [Candida... | <a href="#">CDD</a> | <a href="#">UniProt</a> | <a href="#">Pfam</a> | <a href="#">InterPro</a> |
| A3K78_06265         | <a href="#">OGD56155</a> | hypothetical protein A3K78_06265 [Candida... | <a href="#">CDD</a> | <a href="#">UniProt</a> | <a href="#">Pfam</a> | <a href="#">InterPro</a> |
| A3K78_10790         | <a href="#">OGD58986</a> | hypothetical protein A3K78_10790 [Candida... | <a href="#">CDD</a> | <a href="#">UniProt</a> | <a href="#">Pfam</a> | <a href="#">InterPro</a> |
| <b>Other RRs</b>    |                          |                                              |                     |                         |                      |                          |
| A3K78_02605         | <a href="#">OGD55261</a> | hypothetical protein A3K78_02605 [Candida... | <a href="#">CDD</a> | <a href="#">UniProt</a> | <a href="#">Pfam</a> | <a href="#">InterPro</a> |
| A3K78_05120         | <a href="#">OGD56550</a> | hypothetical protein A3K78_05120 [Candida... | <a href="#">CDD</a> | <a href="#">UniProt</a> | <a href="#">Pfam</a> | <a href="#">InterPro</a> |
| A3K78_09140         | <a href="#">OGD60432</a> | hypothetical protein A3K78_09140 [Candida... | <a href="#">CDD</a> | <a href="#">UniProt</a> | <a href="#">Pfam</a> | <a href="#">InterPro</a> |

---

**Candidatus Bathyarchaeota archaeon RBG\_13\_60\_20**

|                     |                          |                                              |                     |                         |                      |                          |
|---------------------|--------------------------|----------------------------------------------|---------------------|-------------------------|----------------------|--------------------------|
| <b>HisK, no REC</b> |                          |                                              |                     |                         |                      |                          |
| A3K81_01540         | <a href="#">OGD55865</a> | hypothetical protein A3K81_01540 [Candida... | <a href="#">CDD</a> | <a href="#">UniProt</a> | <a href="#">Pfam</a> | <a href="#">InterPro</a> |
| <b>REC only</b>     |                          |                                              |                     |                         |                      |                          |
| A3K81_04645         | <a href="#">OGD53355</a> | hypothetical protein A3K81_04645 [Candida... | <a href="#">CDD</a> | <a href="#">UniProt</a> | <a href="#">Pfam</a> | <a href="#">InterPro</a> |
| <b>REC-HisK</b>     |                          |                                              |                     |                         |                      |                          |
| A3K81_06585         | <a href="#">OGD54085</a> | hypothetical protein A3K81_06585 [Candida... | <a href="#">CDD</a> | <a href="#">UniProt</a> | <a href="#">Pfam</a> | <a href="#">InterPro</a> |



|                  |                          |                      |             |             |                     |                         |                      |                          |
|------------------|--------------------------|----------------------|-------------|-------------|---------------------|-------------------------|----------------------|--------------------------|
| A3K81_00905      | <a href="#">OGD54583</a> | hypothetical protein | A3K81_00905 | [Candida... | <a href="#">CDD</a> | <a href="#">UniProt</a> | <a href="#">Pfam</a> | <a href="#">InterPro</a> |
| A3K81_02575      | <a href="#">OGD53329</a> | hypothetical protein | A3K81_02575 | [Candida... | <a href="#">CDD</a> | <a href="#">UniProt</a> | <a href="#">Pfam</a> | <a href="#">InterPro</a> |
| <b>Other RRs</b> |                          |                      |             |             |                     |                         |                      |                          |
| A3K81_01690      | <a href="#">OGD55697</a> | hypothetical protein | A3K81_01690 | [Candida... | <a href="#">CDD</a> | <a href="#">UniProt</a> | <a href="#">Pfam</a> | <a href="#">InterPro</a> |
| A3K81_03960      | <a href="#">OGD52326</a> | hypothetical protein | A3K81_03960 | [Candida... | <a href="#">CDD</a> | <a href="#">UniProt</a> | <a href="#">Pfam</a> | <a href="#">InterPro</a> |

[Candidatus Bathyarchaeota archaeon RBG 16\\_48\\_13](#)

|                     |                          |                      |             |             |                     |                         |                      |                          |
|---------------------|--------------------------|----------------------|-------------|-------------|---------------------|-------------------------|----------------------|--------------------------|
| <b>HisK, no REC</b> |                          |                      |             |             |                     |                         |                      |                          |
| A3K70_04505         | <a href="#">OGD45808</a> | hypothetical protein | A3K70_04505 | [Candida... | <a href="#">CDD</a> | <a href="#">UniProt</a> | <a href="#">Pfam</a> | <a href="#">InterPro</a> |
| <b>REC only</b>     |                          |                      |             |             |                     |                         |                      |                          |
| A3K70_00955         | <a href="#">OGD45656</a> | hypothetical protein | A3K70_00955 | [Candida... | <a href="#">CDD</a> | <a href="#">UniProt</a> | <a href="#">Pfam</a> | <a href="#">InterPro</a> |
| <b>REC-HisK</b>     |                          |                      |             |             |                     |                         |                      |                          |
| A3K70_00960         | <a href="#">OGD45657</a> | hypothetical protein | A3K70_00960 | [Candida... | <a href="#">CDD</a> | <a href="#">UniProt</a> | <a href="#">Pfam</a> | <a href="#">InterPro</a> |

[Candidatus Bathyarchaeota archaeon RBG 16\\_57\\_9](#)

|                     |                          |                      |             |             |                     |                         |                      |                          |
|---------------------|--------------------------|----------------------|-------------|-------------|---------------------|-------------------------|----------------------|--------------------------|
| <b>HisK, no REC</b> |                          |                      |             |             |                     |                         |                      |                          |
| A3K69_03215         | <a href="#">OGD44555</a> | hypothetical protein | A3K69_03215 | [Candida... | <a href="#">CDD</a> | <a href="#">UniProt</a> | <a href="#">Pfam</a> | <a href="#">InterPro</a> |
| A3K69_03770         | <a href="#">OGD45604</a> | hypothetical protein | A3K69_03770 | [Candida... | <a href="#">CDD</a> | <a href="#">UniProt</a> | <a href="#">Pfam</a> | <a href="#">InterPro</a> |
| <b>REC only</b>     |                          |                      |             |             |                     |                         |                      |                          |
| A3K69_02765         | <a href="#">OGD45447</a> | hypothetical protein | A3K69_02765 | [Candida... | <a href="#">CDD</a> | <a href="#">UniProt</a> | <a href="#">Pfam</a> | <a href="#">InterPro</a> |
| A3K69_00135         | <a href="#">OGD44459</a> | hypothetical protein | A3K69_00135 | [Candida... | <a href="#">CDD</a> | <a href="#">UniProt</a> | <a href="#">Pfam</a> | <a href="#">InterPro</a> |
| <b>REC-HisK</b>     |                          |                      |             |             |                     |                         |                      |                          |
| A3K69_01050         | <a href="#">OGD46118</a> | hypothetical protein | A3K69_01050 | [Candida... | <a href="#">CDD</a> | <a href="#">UniProt</a> | <a href="#">Pfam</a> | <a href="#">InterPro</a> |
| <b>Other RRs</b>    |                          |                      |             |             |                     |                         |                      |                          |
| A3K69_06655         | <a href="#">OGD44705</a> | hypothetical protein | A3K69_06655 | [Candida... | <a href="#">CDD</a> | <a href="#">UniProt</a> | <a href="#">Pfam</a> | <a href="#">InterPro</a> |
| A3K69_03970         | <a href="#">OGD48311</a> | hypothetical protein | A3K69_03970 | [Candida... | <a href="#">CDD</a> | <a href="#">UniProt</a> | <a href="#">Pfam</a> | <a href="#">InterPro</a> |
| A3K69_05730         | <a href="#">OGD48668</a> | hypothetical protein | A3K69_05730 | [Candida... | <a href="#">CDD</a> | <a href="#">UniProt</a> | <a href="#">Pfam</a> | <a href="#">InterPro</a> |

[unclassified Crenarchaeota](#)

[Crenarchaeota archaeon 13\\_1\\_20CM\\_2\\_51\\_8](#)

|                 |                          |                                |               |             |                     |                         |                      |                                     |
|-----------------|--------------------------|--------------------------------|---------------|-------------|---------------------|-------------------------|----------------------|-------------------------------------|
| <b>REC only</b> |                          |                                |               |             |                     |                         |                      |                                     |
| AUF79_04595     | <a href="#">OLE91433</a> | hypothetical protein           | AUF79_04595   | [Crenarc... | <a href="#">CDD</a> | <a href="#">UniProt</a> | <a href="#">Pfam</a> | <a href="#">InterPro</a>            |
| AUF79_17120     | <a href="#">OLE84948</a> | hypothetical protein           | AUF79_17120   | [Crenarc... | <a href="#">CDD</a> | <a href="#">UniProt</a> | <a href="#">Pfam</a> | <a href="#">InterPro</a>            |
| AUF79_01930     | <a href="#">OLE91858</a> | hypothetical protein           | AUF79_01930   | [Crenarc... | <a href="#">CDD</a> | <a href="#">UniProt</a> | <a href="#">Pfam</a> | <a href="#">InterPro</a>            |
| <b>REC-wHTH</b> |                          |                                |               |             |                     |                         |                      |                                     |
| AUF79_12530     | <a href="#">OLE89065</a> | hypothetical protein           | AUF79_12530   | [Crenarc... | <a href="#">CDD</a> | <a href="#">UniProt</a> | <a href="#">Pfam</a> | <a href="#">InterPro</a> (REC-LuxR) |
| AUF79_11280     | <a href="#">OLE89891</a> | DNA-binding response regulator | [Crenarcha... |             | <a href="#">CDD</a> | <a href="#">UniProt</a> | <a href="#">Pfam</a> | <a href="#">InterPro</a> (REC-LuxR) |
| AUF79_11870     | <a href="#">OLE89516</a> | hypothetical protein           | AUF79_11870   | [Crenarc... | <a href="#">CDD</a> | <a href="#">UniProt</a> | <a href="#">Pfam</a> | <a href="#">InterPro</a> (REC-LuxR) |

[Crenarchaeota archaeon 13\\_1\\_20CM\\_2\\_53\\_14](#)

|                     |                          |                      |             |             |                     |                         |                      |                          |
|---------------------|--------------------------|----------------------|-------------|-------------|---------------------|-------------------------|----------------------|--------------------------|
| <b>HisK, no REC</b> |                          |                      |             |             |                     |                         |                      |                          |
| AUG17_00415         | <a href="#">OLE59984</a> | hypothetical protein | AUG17_00415 | [Crenarc... | <a href="#">CDD</a> | <a href="#">UniProt</a> | <a href="#">Pfam</a> | <a href="#">InterPro</a> |
| <b>REC only</b>     |                          |                      |             |             |                     |                         |                      |                          |
| AUG17_00410         | <a href="#">OLE59983</a> | hypothetical protein | AUG17_00410 | [Crenarc... | <a href="#">CDD</a> | <a href="#">UniProt</a> | <a href="#">Pfam</a> | <a href="#">InterPro</a> |

[miscellaneous Crenarchaeota group archaeon SMTZ-80](#)

|                                  |                          |                           |                           |  |                     |                         |                      |                                        |
|----------------------------------|--------------------------|---------------------------|---------------------------|--|---------------------|-------------------------|----------------------|----------------------------------------|
| <b>HisK, no REC</b>              |                          |                           |                           |  |                     |                         |                      |                                        |
| AC481_01535                      | <a href="#">KON28410</a> | hypothetical protein      | AC481_01535, partial...   |  | <a href="#">CDD</a> | <a href="#">UniProt</a> | <a href="#">Pfam</a> | <a href="#">InterPro</a>               |
| AC481_01710                      | <a href="#">KON28442</a> | hypothetical protein      | AC481_01710 [miscell...   |  | <a href="#">CDD</a> | <a href="#">UniProt</a> | <a href="#">Pfam</a> | <a href="#">InterPro</a>               |
| AC481_05500                      | <a href="#">KON27185</a> | hypothetical protein      | AC481_05500 [miscell...   |  | <a href="#">CDD</a> | <a href="#">UniProt</a> | <a href="#">Pfam</a> | <a href="#">InterPro</a>               |
| AC481_05740                      | <a href="#">KON27109</a> | hypothetical protein      | AC481_05740 [miscell...   |  | <a href="#">CDD</a> | <a href="#">UniProt</a> | <a href="#">Pfam</a> | <a href="#">InterPro</a>               |
| AC481_07300                      | <a href="#">KON26384</a> | histidine kinase, partial | [miscellaneous ...        |  | <a href="#">CDD</a> | <a href="#">UniProt</a> | <a href="#">Pfam</a> | <a href="#">InterPro</a>               |
| <b>REC only</b>                  |                          |                           |                           |  |                     |                         |                      |                                        |
| AC481_04280                      | <a href="#">KON27604</a> | hypothetical protein      | AC481_04280 [miscell...   |  | <a href="#">CDD</a> | <a href="#">UniProt</a> | <a href="#">Pfam</a> | <a href="#">InterPro</a>               |
| <b>NtrC family (REC-AAA-Fis)</b> |                          |                           |                           |  |                     |                         |                      |                                        |
| AC481_01540                      | <a href="#">KON28411</a> | hypothetical protein      | AC481_01540 [miscell...   |  | <a href="#">CDD</a> | <a href="#">UniProt</a> | <a href="#">Pfam</a> | <a href="#">InterPro</a> (REC-AAA-Fis) |
| AC481_01705                      | <a href="#">KON28441</a> | hypothetical protein      | AC481_01705 [miscell...   |  | <a href="#">CDD</a> | <a href="#">UniProt</a> | <a href="#">Pfam</a> | <a href="#">InterPro</a> (REC-AAA-Fis) |
| <b>Other RRs</b>                 |                          |                           |                           |  |                     |                         |                      |                                        |
| AC481_01605                      | <a href="#">KON28423</a> | response regulator        | [miscellaneous Crenarc... |  | <a href="#">CDD</a> | <a href="#">UniProt</a> | <a href="#">Pfam</a> | <a href="#">InterPro</a> (REC-PglZ)    |

[miscellaneous Crenarchaeota group archaeon SMTZ1-55](#)

|                                  |                          |                      |                         |  |                     |                         |                      |                                        |
|----------------------------------|--------------------------|----------------------|-------------------------|--|---------------------|-------------------------|----------------------|----------------------------------------|
| <b>REC only</b>                  |                          |                      |                         |  |                     |                         |                      |                                        |
| *AC480_06220                     | <a href="#">KON26173</a> | hypothetical protein | AC480_06220, partial... |  | <a href="#">CDD</a> | <a href="#">UniProt</a> | <a href="#">Pfam</a> | <a href="#">InterPro</a>               |
| <b>Frz family (REC-REC)</b>      |                          |                      |                         |  |                     |                         |                      |                                        |
| AC480_06215                      | <a href="#">KON26172</a> | hypothetical protein | AC480_06215 [miscell... |  | <a href="#">CDD</a> | <a href="#">UniProt</a> | <a href="#">Pfam</a> | <a href="#">InterPro</a> (REC-REC)     |
| <b>NtrC family (REC-AAA-Fis)</b> |                          |                      |                         |  |                     |                         |                      |                                        |
| AC480_00075                      | <a href="#">KON30915</a> | hypothetical protein | AC480_00075 [miscell... |  | <a href="#">CDD</a> | <a href="#">UniProt</a> | <a href="#">Pfam</a> | <a href="#">InterPro</a> (REC-AAA-Fis) |

[miscellaneous Crenarchaeota group-6 archaeon AD8-1](#)

|                     |                          |                      |                         |  |                     |                         |                      |                          |
|---------------------|--------------------------|----------------------|-------------------------|--|---------------------|-------------------------|----------------------|--------------------------|
| <b>HisK, no REC</b> |                          |                      |                         |  |                     |                         |                      |                          |
| AC479_03670         | <a href="#">KON33644</a> | hypothetical protein | AC479_03670 [miscell... |  | <a href="#">CDD</a> | <a href="#">UniProt</a> | <a href="#">Pfam</a> | <a href="#">InterPro</a> |

REC-HisK

AC479\_01620 [KON34176](#) hypothetical protein AC479\_01620 [miscell...

[CDD](#)

[UniProt](#)

[Pfam](#)

[InterPro](#)

---

Please send corrections, questions and comments to [Michael Galperin](#)
